# Supplementary material
Source: PubMed Central journal article supplement (PMC141204)
Supplement: plntcell_15_2_317__1.pdf [file plntcell_15_2_317__1.pdf]

|         |         |         |                  |
|---------|---------|---------|------------------|
| NODE1X  | ARRY8X  | ARRY9X  | 0.96636962890625 |
| NODE2X  | ARRY10X | ARRY11X | 0.96624755859375 |
| NODE3X  | ARRY1X  | ARRY2X  | 0.86956787109375 |
| NODE4X  | NODE1X  | NODE2X  | 0.8681640625     |
| NODE5X  | ARRY6X  | ARRY7X  | 0.83978271484375 |
| NODE6X  | ARRY4X  | ARRY5X  | 0.72930908203125 |
| NODE7X  | NODE3X  | ARRY3X  | 0.71234130859375 |
| NODE8X  | NODE6X  | NODE5X  | 0.54376220703125 |
| NODE9X  | ARRY0X  | NODE7X  | 0.53948974609375 |
| NODE10X | NODE8X  | NODE4X  | 0.4075927734375  |
| NODE11X | NODE9X  | NODE10X | 0.064453125      |
