# Supplementary material
Source: PubMed Central journal article supplement (PMC141204)
Supplement: plntcell_15_2_317__4.pdf [file plntcell_15_2_317__4.pdf]

| GID       | probeset_id | NAME       | GWEIGHT | Pst 3h | Pst 6h | Pst 9h | Psm 3h | Psm 6h | Psm 9h   | Pst/avrRpt2 3h | Pst/avrRpt2 6h | Pst/avrRpt2 9h | Psm 30h |
|-----------|-------------|------------|---------|--------|--------|--------|--------|--------|----------|----------------|----------------|----------------|---------|
| EWEIGHT   | 1           | 1          | 1       | 1      | 1      | 1      | 1      | 1      | 1        | 1              | 1              | 1              | 1       |
| GENE2953X | 17533_s_at  | 17533_s_at | 1       | 0.65   | 0.26   | -0.48  | 1.08   | 1.76   | 1.19     |                |                |                |         |
|           | 2.42        | 2.92       | 1.77    | 2.34   | 4.36   | 3.83   | 5.36   |        |          |                |                |                |         |
| GENE2952X | 19916_at    | 19916_at   | 1       | 0.43   | 0.15   | 0.12   | 0.67   | 0.39   | 0.32     |                |                |                |         |
|           | 1.35        | 1.62       | 0.93    | 1      | 1.81   | 1.3    | 2.54   |        |          |                |                |                |         |
| GENE2951X | 18257_at    | 18257_at   | 1       | 0.27   | -0.27  | -0.27  | 0.29   | 0.1    | -0.00893 |                |                |                |         |
|           | 0.4         | 0.57       | 0.31    | 0.42   | 0.98   | 0.72   | 1.29   |        |          |                |                |                |         |
| GENE2875X | 18567_at    | 18567_at   | 1       | 1.6    | -0.2   | 0.14   | 1.41   | 0.01   | 0.28     |                |                |                |         |
|           | 2.01        | 1.88       | 0.84    | 1.58   | 2.06   | 0.84   | 2.67   |        |          |                |                |                |         |
| GENE2874X | 16968_at    | 16968_at   | 1       | 2.89   | 1.45   | 0.36   | 2.28   | 1.72   | 0.61     |                |                |                |         |
|           | 2.94        | 3.55       | 2.28    | 2.92   | 3.92   | 2.3    | 5.09   |        |          |                |                |                |         |
| GENE2873X | 12062_at    | 12062_at   | 1       | 1.21   | 0.5    | 0.43   | 0.75   | 0.42   | 0.59     |                |                |                |         |
|           | 1.34        | 1.71       | 1.12    | 1.06   | 1.9    | 1.28   | 2.1    |        |          |                |                |                |         |
| GENE2872X | 19914_at    | 19914_at   | 1       | 1.13   | 0.31   | 0.07   | 0.68   | 0.42   | 0.67     |                |                |                |         |
|           | 1.06        | 1.28       | 0.48    | 0.88   | 1.33   | 0.83   | 1.6    |        |          |                |                |                |         |
| GENE2871X | 19747_at    | 19747_at   | 1       | 0.63   | 0.1    | 0.66   | 1.63   | 0.88   | 0.8      |                |                |                |         |
|           | 1.83        | 1.85       | 1.22    | 1.29   | 1.97   | 1.22   | 2.2    |        |          |                |                |                |         |
| GENE2870X | 16570_s_at  | 16570_s_at | 1       | 1.62   | 0.7    | 0.06   | 1.35   | 1.02   | 0.51     |                |                |                |         |
|           | 2.86        | 3.05       | 1.63    | 2.32   | 3.08   | 1.85   | 3.43   |        |          |                |                |                |         |
| GENE2869X | 15900_at    | 15900_at   | 1       | 0.75   | 0.18   | 0.11   | 0.76   | 0.34   | 0.08     |                |                |                |         |
|           | 1.44        | 1.23       | 0.93    | 1.1    | 1.3    | 1.04   | 1.41   |        |          |                |                |                |         |
| GENE2868X | 20258_at    | 20258_at   | 1       | 1.36   | 0.78   | 0.48   | 1.2    | 0.73   | 0.32     |                |                |                |         |
|           | 1.79        | 2.11       | 1.15    | 1.83   | 2      | 1.41   | 2.45   |        |          |                |                |                |         |
| GENE2867X | 19433_at    | 19433_at   | 1       | 0.84   | 0.31   | 0.28   | 0.74   | 0.53   | 0.26     |                |                |                |         |
|           | 1.07        | 1.33       | 0.72    | 1.08   | 1.27   | 0.96   | 1.2    |        |          |                |                |                |         |
| GENE2863X | 17881_at    | 17881_at   | 1       | 0.55   | 0.46   | 0.17   | 1.05   | 0.88   | 0.42     |                |                |                |         |
|           | 1.23        | 1.34       | 0.57    | 1.54   | 1.56   | 0.69   | 2.08   |        |          |                |                |                |         |
| GENE2626X | 16568_s_at  | 16568_s_at | 1       | 0.58   | 0.17   | 0.17   | 0.63   | 0.31   | 0        |                |                |                |         |
|           | 1.02        | 1.19       | 0.46    | 1.25   | 1.25   | 0.38   | 1.53   |        |          |                |                |                |         |
| GENE2625X | 15884_at    | 15884_at   | 1       | 0.52   | 0.19   | -0.03  | 0.76   | 0.44   | 0.03     |                |                |                |         |
|           | 0.56        | 1.23       | 0.4     | 1      | 1      | 0.54   | 1.39   |        |          |                |                |                |         |
| GENE2624X | 13087_at    | 13087_at   | 1       | 0.24   | 0.32   | -0.07  | 0.33   | 0.27   | 0.18     |                |                |                |         |
|           | 0.57        | 0.94       | 0.5     | 1.07   | 0.87   | 0.54   | 1.17   |        |          |                |                |                |         |
| GENE2422X | 18720_s_at  | 18720_s_at | 1       | 0.81   | 0.3    | -0.27  | 0.8    | 0.62   | -0.04    |                |                |                |         |
|           | 1.45        | 1.94       | 0.74    | 1.5    | 1.9    | 1      | 1.43   |        |          |                |                |                |         |
| GENE2421X | 13944_at    | 13944_at   | 1       | 0.75   | 0.39   | -0.06  | 1.05   | 0.48   | -0.56    |                |                |                |         |
|           | 1.34        | 1.34       | 0.65    | 1.38   | 1.65   | 1.09   | 1.39   |        |          |                |                |                |         |
| GENE2623X | 15355_at    | 15355_at   | 1       | 0.33   | -0.07  | 0.35   | 0.16   | 0.07   | 0        |                |                |                |         |
|           | 0.38        | 1.03       | 0.55    | 0.77   | 0.89   | 0.51   | 0.96   |        |          |                |                |                |         |
| GENE2622X | 18719_r_at  | 18719_r_at | 1       | 0.51   | 0.11   | 0.28   | 0.53   | 0.06   | 0.14     |                |                |                |         |
|           | 0.81        | 1.14       | 0.93    | 1.11   | 0.74   | 1.04   | 1.54   |        |          |                |                |                |         |
| GENE2702X | 16721_at    | 16721_at   | 1       | 0.87   | 0.9    | 0.7    | 1.66   | 0.93   | 1.08     |                |                |                |         |
|           | 1.97        | 3.27       | 2.27    | 1.93   | 3.45   | 2.7    | 2.8    |        |          |                |                |                |         |
| GENE2195X | 17967_at    | 17967_at   | 1       | 1.41   | 1.32   | 0.58   | 1.58   | 1.52   | 0.95     |                |                |                |         |
|           | 2.15        | 2.85       | 1.93    | 2.5    | 3.12   | 2.23   | 3.05   |        |          |                |                |                |         |
| GENE2194X | 19465_at    | 19465_at   | 1       | 1      | 0.79   | 0.33   | 0.85   | 1.45   | 0.73     |                |                |                |         |
|           | 2.19        | 2.56       | 1.62    | 2.22   | 2.73   | 2.05   | 2.52   |        |          |                |                |                |         |
| GENE2193X | 18045_at    | 18045_at   | 1       | 0.37   | 0.32   | 0.16   | 0.86   | 0.73   | 0.27     |                |                |                |         |
|           | 0.49        | 1.41       | 0.84    | 1.23   | 1.32   | 0.9    | 1.18   |        |          |                |                |                |         |
| GENE2634X | 17930_s_at  | 17930_s_at | 1       | 1.62   | 1.43   | 0.44   | 1.21   | 1.37   | 0.66     |                |                |                |         |
|           | 0.85        | 1.88       | 1.61    | 1.64   | 3.2    | 2.19   | 6.11   |        |          |                |                |                |         |
| GENE2633X | 19060_at    | 19060_at   | 1       | 1.05   | 1.24   | 1.2    | 1.03   | 0.93   | 0.25     |                |                |                |         |
|           | 0.84        | 1.75       | 1.32    | 0.88   | 1.24   | 1.13   | 3.9    |        |          |                |                |                |         |

|           |            |            |       |       |       |       |      |       |       |   |  |  |
|-----------|------------|------------|-------|-------|-------|-------|------|-------|-------|---|--|--|
| GENE2631X | 13025_at   | 13025_at   | 1     | 0.33  | 0.67  | 1.03  | 0.48 | 0.75  | -0.44 |   |  |  |
|           | 0.58       | 1.26       | 0.87  | 0.67  | 1.16  | 0.92  | 2.02 |       |       |   |  |  |
| GENE2632X | 15614_s_at | 15614_s_at | 1     | 0.13  | 0.62  | 0.09  | 0.33 | 0.14  | -0.44 |   |  |  |
|           | 0.3        | 1.06       | 0.44  | 0.88  | 0.95  | 0.36  | 2.1  |       |       |   |  |  |
| GENE2630X | 14584_at   | 14584_at   | 1     | 0.92  | 0.33  | -0.4  | 0.8  | 0.79  | 0.15  | 1 |  |  |
|           | 1.11       | 0.53       | 1.37  | 1.58  | 0.69  | 2.65  |      |       |       |   |  |  |
| GENE2629X | 17507_at   | 17507_at   | 1     | 0.67  | 1.22  | 0.32  | 1.07 | 0.69  | 0.26  |   |  |  |
|           | 1.44       | 1.56       | 0.76  | 1.4   | 1.44  | 0.74  | 3.2  |       |       |   |  |  |
| GENE2628X | 15815_at   | 15815_at   | 1     | 0.56  | 0.24  | 0.02  | 0.53 | 0.51  | -0.1  |   |  |  |
|           | 0.75       | 1.05       | 0.1   | 0.96  | 1.12  | 0.38  | 2.17 |       |       |   |  |  |
| GENE2627X | 18304_s_at | 18304_s_at | 1     | 0.32  | 0.48  | 0.07  | 0.41 | 0.45  | -0.05 |   |  |  |
|           | 0.45       | 1.01       | 0.31  | 0.69  | 0.94  | 0.26  | 2.07 |       |       |   |  |  |
| GENE2714X | 16908_at   | 16908_at   | 1     | 0.54  | 0.69  | -0.05 | 0.33 | 0.82  | 0.18  |   |  |  |
|           | 0.42       | 1.16       | 0.5   | 0.03  | 1.27  | 1.02  | 1.46 |       |       |   |  |  |
| GENE2713X | 16641_at   | 16641_at   | 1     | 0.27  | 0.38  | -0.08 | 0.19 | 0.66  | 0.21  |   |  |  |
|           | 0.25       | 0.94       | 0.19  | 0.21  | 0.89  | 0.21  | 1.21 |       |       |   |  |  |
| GENE2418X | 14085_at   | 14085_at   | 1     | 0.42  | 0.27  | -0.36 | 0.42 | 0.07  | 0.23  |   |  |  |
|           | 0.55       | 1.17       | 0.23  | 0.28  | 1.12  | 0.53  | 1.21 |       |       |   |  |  |
| GENE2192X | 13880_s_at | 13880_s_at | 1     | 0.47  | 0.45  | -0.52 | 0.33 | 1.11  | 0.36  |   |  |  |
|           | 0.76       | 1.52       | 0.92  | 1.38  | 2.1   | 1.39  | 1.89 |       |       |   |  |  |
| GENE2191X | 17925_at   | 17925_at   | 1     | 0.33  | 0.32  | -0.31 | 0.38 | 0.78  | 0.32  |   |  |  |
|           | 0.47       | 1.04       | 0.17  | 0.62  | 1.22  | 0.57  | 0.79 |       |       |   |  |  |
| GENE2190X | 20402_at   | 20402_at   | 1     | 0.42  | 0.52  | -0.28 | 0.45 | 1.22  | 0.16  |   |  |  |
|           | 0.59       | 1.06       | 0.46  | 0.67  | 1.08  | 0.53  | 1.03 |       |       |   |  |  |
| GENE2523X | 16134_at   | 16134_at   | 1     | 0.48  | -0.29 | -0.32 | 0.77 | 0.25  | 0.28  |   |  |  |
|           | 1.73       | 0.44       | 0.53  | 1.74  | 0.99  | 0.89  | 2.13 |       |       |   |  |  |
| GENE2516X | 17752_at   | 17752_at   | 1     | 0.85  | -0.47 | -0.34 | 0.88 | 0.19  | 0.21  |   |  |  |
|           | 1.09       | 0.49       | 0.56  | 0.96  | 0.72  | 0.6   | 1.62 |       |       |   |  |  |
| GENE2515X | 12584_at   | 12584_at   | 1     | 1.24  | -0.53 | -0.23 | 1.08 | -0.37 | -0.18 |   |  |  |
|           | 1.75       | 0.58       | 0.88  | 1.85  | 0.72  | 1.34  | 3.43 |       |       |   |  |  |
| GENE2518X | 19230_at   | 19230_at   | 1     | 1.06  | 0.2   | 0.2   | 1.55 | 0.5   | 0.19  |   |  |  |
|           | 2.24       | 1.5        | 0.82  | 2.42  | 1.45  | 0.83  | 4.18 |       |       |   |  |  |
| GENE2517X | 12958_at   | 12958_at   | 1     | 1.34  | 0.06  | 0.22  | 1.6  | 0.4   | 0     |   |  |  |
|           | 1.75       | 1.28       | 0.74  | 1.75  | 1.23  | 1.12  | 3.47 |       |       |   |  |  |
| GENE2514X | 20382_s_at | 20382_s_at | 1     | 0.47  | -0.31 | -0.36 | 0.83 | -0.12 | -0.15 |   |  |  |
|           | 1.07       | 0.82       | 0.04  | 1.06  | 0.89  | 0.14  | 1.89 |       |       |   |  |  |
| GENE2492X | 15203_s_at | 15203_s_at | 1     | -0.03 | -0.3  | 0.71  | 0.54 | 0.2   | 0.68  |   |  |  |
|           | 1.53       | 0.22       | 1.01  | 1.17  | 1.34  | 0.87  | 2.93 |       |       |   |  |  |
| GENE2491X | 16329_at   | 16329_at   | 1     | 0.25  | -0.31 | 0.09  | 0.6  | 0.38  | 0.38  |   |  |  |
|           | 0.66       | 0.14       | 0.45  | 0.47  | 0.23  | 0.3   | 1.58 |       |       |   |  |  |
| GENE2490X | 14502_at   | 14502_at   | 1     | 0.48  | 0     | -0.26 | 1.67 | 0     | 0.22  |   |  |  |
|           | 1.48       | 0          | 1.41  | 1.67  | 0.67  | 0.87  | 2.58 |       |       |   |  |  |
| GENE2500X | 16781_at   | 16781_at   | 1     | 0.09  | 0.2   | -1.24 | 0.65 | 0.62  | 0.5   |   |  |  |
|           | 0.89       | 1.2        | -0.11 | 0.28  | 2     | 0.75  | 3.51 |       |       |   |  |  |
| GENE2499X | 18140_at   | 18140_at   | 1     | 0.36  | 0.35  | -0.66 | 0.41 | 1.21  | 0.95  |   |  |  |
|           | 0.63       | 0.81       | 0.26  | 0.12  | 1.83  | 0.97  | 2.78 |       |       |   |  |  |
| GENE2498X | 16950_s_at | 16950_s_at | 1     | 0.51  | 0.1   | -0.07 | 0.23 | 0.45  | 0.1   |   |  |  |
|           | 0.54       | 0.44       | 0.03  | 0.22  | 0.54  | 0.22  | 1.31 |       |       |   |  |  |
| GENE2497X | 20069_at   | 20069_at   | 1     | 0.41  | 0.05  | -0.34 | 0.26 | 0.33  | 0.02  |   |  |  |
|           | 0.31       | 0.25       | -0.25 | 0.28  | 0.52  | 0.16  | 1.15 |       |       |   |  |  |
| GENE2496X | 18676_g_at | 18676_g_at | 1     | 0.25  | 0.29  | -0.34 | 0.17 | 0.33  | 0.03  |   |  |  |
|           | 0.33       | 0.33       | 0.03  | 0.1   | 0.32  | 0.35  | 1.28 |       |       |   |  |  |
| GENE2495X | 20239_g_at | 20239_g_at | 1     | 1.22  | 0.04  | -0.52 | 1.13 | 0.83  | 0.42  |   |  |  |
|           | 1.3        | 0.18       | -0.33 | 1.24  | 0.85  | 0.73  | 3    |       |       |   |  |  |
| GENE2494X | 20238_at   | 20238_at   | 1     | 1.14  | 0.19  | -0.03 | 0.92 | 0.76  | 0.43  |   |  |  |
|           | 1.16       | 0.23       | 0.06  | 0.93  | 0.72  | 0.79  | 2.45 |       |       |   |  |  |

|           |            |            |       |       |       |       |      |       |       |   |  |
|-----------|------------|------------|-------|-------|-------|-------|------|-------|-------|---|--|
| GENE2493X | 14381_at   | 14381_at   | 1     | 0.59  | -0.32 | -0.15 | 0.16 | 0.08  | 0.41  |   |  |
|           | 0.5        | 0          | 0.09  | 0.25  | 0.66  | 0.62  | 1.89 |       |       |   |  |
| GENE2642X | 17877_g_at | 17877_g_at | 1     | -0.27 | 0.02  | -0.54 | 0.12 | 0.78  | 0.3   | - |  |
|           | 0.31       | 0.49       | 0     | 0.43  | 2.25  | 0.82  | 1.77 |       |       |   |  |
| GENE2503X | 17876_at   | 17876_at   | 1     | -0.15 | -0.22 | -0.72 | 0.51 | 0.47  | 0.2   | - |  |
|           | 0.23       | 0.3        | -0.09 | 0.53  | 1.31  | 0.3   | 2.82 |       |       |   |  |
| GENE2502X | 17380_at   | 17380_at   | 1     | 0.03  | -0.08 | -0.6  | 0.3  | 0.22  | 0.12  |   |  |
|           | 0.3        | 0.25       | 0.21  | 0.62  | 0.66  | 0.64  | 1.75 |       |       |   |  |
| GENE2501X | 20030_at   | 20030_at   | 1     | -0.15 | 0.03  | -0.75 | 0.45 | 0.53  | -0.52 |   |  |
|           | 0.46       | 0.11       | 0.08  | 0.9   | 0.85  | 0.16  | 1.85 |       |       |   |  |
| GENE2837X | 15197_s_at | 15197_s_at | 1     | -0.2  | -0.66 | -0.32 | 0.06 | -0.2  | 0.29  |   |  |
|           | 0.41       | 0.27       | 0.34  | 0.58  | 0.99  | 1.17  | 1.3  |       |       |   |  |
| GENE2836X | 18575_at   | 18575_at   | 1     | 0     | -0.52 | -0.4  | 0.27 | -0.41 | 0.18  |   |  |
|           | 0.32       | 0          | 0.4   | 0.96  | 0.03  | 1.2   | 0.95 |       |       |   |  |
| GENE2839X | 20572_at   | 20572_at   | 1     | 0     | 0.08  | 0.58  | 1.25 | 0.7   | 1.04  |   |  |
|           | 0.22       | 0          | 2.08  | 0.63  | 0.58  | 2.35  | 1.12 |       |       |   |  |
| GENE2838X | 19667_at   | 19667_at   | 1     | 1     | -0.45 | 1.13  | 2.32 | 0.44  | 1.96  |   |  |
|           | 0.26       | 0.24       | 1.58  | 2     | 0.54  | 2.35  | 1.46 |       |       |   |  |
| GENE2841X | 17514_s_at | 17514_s_at | 1     | 0     | -0.24 | 0.84  | 1.26 | 0.62  | 1.92  |   |  |
|           | 1.26       | -0.53      | 2     | 2.07  | 0.88  | 2.72  | 3.35 |       |       |   |  |
| GENE2840X | 12198_at   | 12198_at   | 1     | 0.1   | -0.57 | 1.14  | 1.08 | -0.24 | 0.88  |   |  |
|           | 0.75       | -0.57      | 1.05  | 0.89  | 0.42  | 0.95  | 1.58 |       |       |   |  |
| GENE1892X | 18888_at   | 18888_at   | 1     | 1.92  | 0     | 2.43  | 2.13 | 0.67  | 1.76  |   |  |
|           | 2.07       | 1.26       | 3.2   | 1.84  | 1.37  | 4.13  | 5.83 |       |       |   |  |
| GENE1891X | 18782_at   | 18782_at   | 1     | 0.22  | 0.03  | 0.76  | 0.37 | 0.21  | 0.78  |   |  |
|           | 0.65       | 0.61       | 1.11  | 0.81  | 0.57  | 0.86  | 2.11 |       |       |   |  |
| GENE1890X | 12037_at   | 12037_at   | 1     | 1.12  | -0.12 | 1.56  | 1.86 | 0.62  | 1.4   |   |  |
|           | 1.27       | 0.75       | 1.48  | 1.59  | 0.68  | 1.23  | 3    |       |       |   |  |
| GENE1889X | 19848_s_at | 19848_s_at | 1     | 0.76  | 0.13  | 0.89  | 0.91 | 0.27  | 1.15  |   |  |
|           | 1.35       | 0.5        | 1.09  | 1.18  | 0.61  | 1.27  | 2.69 |       |       |   |  |
| GENE2506X | 15930_at   | 15930_at   | 1     | 0.68  | 0.27  | -0.08 | 0.95 | -0.12 | 0.63  |   |  |
|           | 0.58       | 0          | -0.16 | 0.07  | 0.27  | 0.41  | 1.02 |       |       |   |  |
| GENE2505X | 17097_at   | 17097_at   | 1     | 1.16  | -0.13 | 0.2   | 1.66 | 0.17  | 0.77  |   |  |
|           | 1.2        | 0.04       | 0.26  | 1.69  | 0.18  | 0.4   | 1.81 |       |       |   |  |
| GENE2504X | 20229_at   | 20229_at   | 1     | 0.54  | -0.01 | 0.17  | 0.69 | -0.04 | 0.39  |   |  |
|           | 0.5        | -0.19      | 0.08  | 0.43  | -0.14 | 0.37  | 1.03 |       |       |   |  |
| GENE2489X | 13211_s_at | 13211_s_at | 1     | 0.69  | 1.07  | -0.07 | 1.3  | -0.51 | 0.65  |   |  |
|           | 0.82       | 0.37       | 0.79  | 0.46  | 1     | 1.53  | 3.04 |       |       |   |  |
| GENE2488X | 15543_at   | 15543_at   | 1     | 0.48  | 0.16  | -1    | 1.13 | 0.16  | 1.14  |   |  |
|           | 0.67       | 0.8        | 0.58  | 1.37  | 0     | 1.19  | 3.83 |       |       |   |  |
| GENE1677X | 19645_at   | 19645_at   | 1     | 0.48  | 0     | -0.58 | 1.32 | -0.2  | 0.83  | 0 |  |
|           | -0.09      | 0.78       | 0.92  | -0.32 | 1.55  | 1.6   |      |       |       |   |  |
| GENE2954X | 18258_at   | 18258_at   | 1     | 0.48  | 0     | 0     | 0    | 0.87  | 1.48  |   |  |
|           | 2.13       | 1.32       | 2.07  | 2.48  | 2.41  | 4.05  | 5.77 |       |       |   |  |
| GENE2823X | 12760_g_at | 12760_g_at | 1     | 0.36  | 0.19  | -0.28 | 0.5  | 0.88  | 0.94  |   |  |
|           | 1.3        | 1.56       | 1.92  | 1.5   | 2.18  | 2.54  | 3.25 |       |       |   |  |
| GENE2822X | 12772_at   | 12772_at   | 1     | 0.41  | -0.1  | -0.18 | 0.47 | 0.64  | 1.24  |   |  |
|           | 1.3        | 1.5        | 2.29  | 1.69  | 1.93  | 2.82  | 3.64 |       |       |   |  |
| GENE2830X | 17585_s_at | 17585_s_at | 1     | 0.81  | 0.11  | 0.92  | 0.55 | 0.81  | 1.17  |   |  |
|           | 1.69       | 2.18       | 2.38  | 1.46  | 2.18  | 2.46  | 4.24 |       |       |   |  |
| GENE2835X | 13565_at   | 13565_at   | 1     | 1.58  | -0.07 | 1.58  | 1.58 | 1.17  | 2.88  |   |  |
|           | 1.39       | 3.52       | 5.43  | 2.42  | 4.61  | 6.56  | 8.4  |       |       |   |  |
| GENE2820X | 14697_g_at | 14697_g_at | 1     | 0.52  | 0.08  | 0.41  | 0.42 | 0.46  | 0.93  |   |  |
|           | 0.79       | 1.5        | 1.58  | 0.9   | 1.75  | 1.99  | 2.64 |       |       |   |  |
| GENE2821X | 19421_at   | 19421_at   | 1     | 0.13  | 0.29  | 0.55  | 0.17 | 0.72  | 1.34  |   |  |
|           | 1.01       | 1.27       | 1.75  | 0.81  | 2     | 2.42  | 2.85 |       |       |   |  |

|           |            |            |           |      |         |       |       |      |      |   |  |
|-----------|------------|------------|-----------|------|---------|-------|-------|------|------|---|--|
| GENE2568X | 13589_at   | 13589_at   | 1         | 0.71 | 0.89    | 0.71  | 0.21  | 0.69 | 1.71 |   |  |
|           | 0.91       | 1.53 2.29  | 0.91 1.39 | 2.44 | 3.27    |       |       |      |      |   |  |
| GENE2567X | 15622_s_at | 15622_s_at | 1         | 0.9  | 0.87    | 0.92  | 0.67  | 0.57 | 1.32 |   |  |
|           | 1.67       | 1.34 2.35  | 1.28 1.36 | 2.52 | 3.9     |       |       |      |      |   |  |
| GENE2740X | 14487_at   | 14487_at   | 1         | 0.5  | 0.16    | -0.08 | -0.39 | 1.2  | 1.09 |   |  |
|           | 0.55       | 0.66 0.51  | 0.15 1.28 | 1.52 | 1.85    |       |       |      |      |   |  |
| GENE2834X | 15116_f_at | 15116_f_at | 1         | 1.21 | 0.49    | 1     | 1.72  | 1.4  | 2.79 |   |  |
|           | 0.84       | 2.14 3.48  | 1.92 3.7  | 4.85 | 7.35    |       |       |      |      |   |  |
| GENE2832X | 13437_at   | 13437_at   | 1         | 0.23 | 0.36    | 0.04  | 0.58  | 0.73 | 1.16 |   |  |
|           | 0.36       | 0.93 1.09  | 0.44 1.29 | 1.77 | 2.27    |       |       |      |      |   |  |
| GENE2551X | 15976_at   | 15976_at   | 1         | 0.29 | 0.00845 |       | 0.01  | 0.25 | 0.5  |   |  |
|           | 0.57       | 0.17 0.18  | 0.62 0.13 | 0.6  | 1.15    | 1.4   |       |      |      |   |  |
| GENE2553X | 15162_at   | 15162_at   | 1         | 0.5  | 0.25    | 0.54  | 0.61  | 0.78 | 2.07 | - |  |
|           | 0.24 0.31  | 1.87 0.7   | 1.64 3.01 | 3.12 |         |       |       |      |      |   |  |
| GENE2552X | 14025_s_at | 14025_s_at | 1         | 0.07 | 0.26    | 0.35  | 0.22  | 0.56 | 1.24 |   |  |
|           | 0.17       | 0.31 0.77  | 0.56 0.61 | 1.4  | 1.94    |       |       |      |      |   |  |
| GENE2829X | 14083_at   | 14083_at   | 1         | 0.37 | 0.23    | 0     | 1.12  | 1.58 | 2.25 |   |  |
|           | 1.81       | 2.58 2.37  | 1.89 3.55 | 3.5  | 4.72    |       |       |      |      |   |  |
| GENE2828X | 20051_at   | 20051_at   | 1         | 0.92 | 1.03    | 0.7   | 1.41  | 1.79 | 1.77 |   |  |
|           | 1.89       | 2.67 2.47  | 1.87 3.56 | 3.67 | 3.91    |       |       |      |      |   |  |
| GENE2827X | 18255_at   | 18255_at   | 1         | 0.9  | 0.62    | 0.66  | 1.25  | 1.3  | 1.61 |   |  |
|           | 1.42       | 1.83 2.01  | 1.27 2.75 | 3    | 3.6     |       |       |      |      |   |  |
| GENE2826X | 16391_at   | 16391_at   | 1         | 1.32 | 0.45    | 0.43  | 0.58  | 0.79 | 2.17 |   |  |
|           | 1.92       | 2.11 2     | 1.26 2.81 | 2.75 | 3.42    |       |       |      |      |   |  |
| GENE2825X | 15646_s_at | 15646_s_at | 1         | 0.56 | 0.08    | 0.09  | 0.36  | 0.83 | 0.88 |   |  |
|           | 0.88       | 1.58 1.92  | 0.96 2.25 | 2.4  | 1.84    |       |       |      |      |   |  |
| GENE2824X | 18885_at   | 18885_at   | 1         | 0.73 | 0.13    | 0.06  | 0.78  | 1.09 | 1.3  |   |  |
|           | 1.3        | 1.77 2.51  | 1.24 2.01 | 2.48 | 2.75    |       |       |      |      |   |  |
| GENE2930X | 14068_s_at | 14068_s_at | 1         | 0.93 | 0.35    | 0.48  | 0.84  | 0.79 | 0.3  |   |  |
|           | 0.97       | 0.58 1.63  | 0.85 1.58 | 2.3  | 2.23    |       |       |      |      |   |  |
| GENE1954X | 16364_at   | 16364_at   | 1         | 0.67 | 0       | 0.67  | 0.67  | 2    | 1.37 |   |  |
|           | 1.13       | 1.37 2.63  | 0.48 3.78 | 3.78 | 2.72    |       |       |      |      |   |  |
| GENE2799X | 13818_s_at | 13818_s_at | 1         | 1.92 | 1.22    | 2.04  | 2.76  | 1.58 | 2.79 | 2 |  |
|           | 3.7        | 4.02 2.37  | 4.36 4.1  | 7.6  |         |       |       |      |      |   |  |
| GENE2798X | 15540_at   | 15540_at   | 1         | 0.54 | 0.14    | 0.62  | 0.55  | 0.31 | 0.86 |   |  |
|           | 0.41       | 0.88 0.83  | 0.69 0.91 | 1    | 1.45    |       |       |      |      |   |  |
| GENE2797X | 13932_at   | 13932_at   | 1         | 0.61 | 0.11    | 0.56  | 0.48  | 0.36 | 0.76 |   |  |
|           | 0.33       | 0.83 0.69  | 0.14 0.93 | 0.91 | 1.44    |       |       |      |      |   |  |
| GENE2786X | 12880_at   | 12880_at   | 1         | 0.68 | 0.37    | 0.84  | 0.97  | 0.65 | 1.25 |   |  |
|           | 1.19       | 1.52 1.63  | 1.17 1.88 | 2.14 | 2.27    |       |       |      |      |   |  |
| GENE2785X | 16902_at   | 16902_at   | 1         | 0.64 | 0.07    | 0.55  | 0.68  | 0.47 | 1.21 |   |  |
|           | 0.91       | 1.21 1.45  | 0.83 1.47 | 1.75 | 1.93    |       |       |      |      |   |  |
| GENE2784X | 16080_f_at | 16080_f_at | 1         | 0.37 | 0.23    | 0.79  | 0.73  | 0.45 | 0.99 |   |  |
|           | 0.66       | 1.28 1.58  | 0.73 1.42 | 1.57 | 1.67    |       |       |      |      |   |  |
| GENE2783X | 13267_at   | 13267_at   | 1         | 0.49 | 0.09    | 0.73  | 0.68  | 0.14 | 0.72 |   |  |
|           | 0.66       | 0.99 1.16  | 0.38 0.97 | 1.18 | 1.34    |       |       |      |      |   |  |
| GENE2801X | 15629_s_at | 15629_s_at | 1         | 0.73 | 0.87    | 1.63  | 1.05  | 1.34 | 2.3  |   |  |
|           | 0.97       | 1.88 2.18  | 1.12 2.28 | 2.46 | 3.25    |       |       |      |      |   |  |
| GENE2800X | 19132_at   | 19132_at   | 1         | 0.55 | 0.43    | 0.99  | 0.73  | 1.1  | 1.3  |   |  |
|           | 0.4        | 1.43 1.29  | 0.54 1.16 | 1.37 | 2       |       |       |      |      |   |  |
| GENE2760X | 18010_s_at | 18010_s_at | 1         | 0.29 | 0.58    | 0.67  | 0.29  | 0.67 | 0.73 |   |  |
|           | 0.41       | 0.99 0.76  | 0.4 1.2   | 1.09 | 1.65    |       |       |      |      |   |  |
| GENE2748X | 15192_at   | 15192_at   | 1         | 0.52 | 1.14    | 1.55  | 0.86  | 1.11 | 1.45 |   |  |
|           | 0.85       | 2.06 1.79  | 1.23 2.08 | 1.85 | 3.01    |       |       |      |      |   |  |
| GENE2747X | 14638_at   | 14638_at   | 1         | 0.44 | 1       | 1.37  | 0.69  | 0.82 | 1.22 |   |  |
|           | 0.55       | 1.76 1.87  | 1.3 1.88  | 1.9  | 3.01    |       |       |      |      |   |  |

|           |            |            |           |       |       |      |      |       |      |   |  |
|-----------|------------|------------|-----------|-------|-------|------|------|-------|------|---|--|
| GENE2746X | 19623_at   | 19623_at   | 1         | 0.21  | 0.28  | 0.72 | 0.4  | 0.29  | 0.73 |   |  |
|           | 0.39       | 0.91 0.94  | 0.43 0.97 | 1.01  | 1.67  |      |      |       |      |   |  |
| GENE2745X | 15173_f_at | 15173_f_at | 1         | 0.2   | 0.37  | 0.61 | 0.37 | 0.19  | 0.59 |   |  |
|           | 0.28       | 0.63 0.87  | 0.36 0.62 | 0.86  | 1.11  |      |      |       |      |   |  |
| GENE2833X | 16995_at   | 16995_at   | 1         | 1.45  | 1.15  | 1.84 | 0.93 | 2.85  | 2.96 |   |  |
|           | 1.28       | 2.76 4.13  | 1.17 3.68 | 5     | 7.15  |      |      |       |      |   |  |
| GENE2583X | 20291_at   | 20291_at   | 1         | 0.25  | 0.9   | 1.78 | 0.57 | 1.29  | 2.2  |   |  |
|           | 0.58       | 1.42 2.56  | 1.02 2.21 | 3.09  | 4.2   |      |      |       |      |   |  |
| GENE2587X | 17485_s_at | 17485_s_at | 1         | 1.67  | 1.36  | 2.13 | 2    | 2.05  | 3.84 |   |  |
|           | 1.26       | 3.53 4.68  | 1.84 4.75 | 6.34  | 7.45  |      |      |       |      |   |  |
| GENE2586X | 20189_at   | 20189_at   | 1         | 0.28  | 0.96  | 1.61 | 1.33 | 1.1   | 2.3  |   |  |
|           | 0.68       | 2.15 3.3   | 1.49 3.1  | 3.98  | 4.41  |      |      |       |      |   |  |
| GENE2585X | 20491_at   | 20491_at   | 1         | 1     | 1.34  | 1.88 | 1.89 | 1.8   | 3.29 |   |  |
|           | 0.42       | 2.02 3.4   | 0.87 3.39 | 4.22  | 4.78  |      |      |       |      |   |  |
| GENE2719X | 13186_g_at | 13186_g_at | 1         | 0.15  | 0.15  | 0.34 | 0.3  | 0.15  | 0.07 |   |  |
|           | 0.11       | 0.7 0.54   | 0.14 0.87 | 0.62  | 1.08  |      |      |       |      |   |  |
| GENE2831X | 15132_s_at | 15132_s_at | 1         | 0     | 0.14  | 1.11 | 0.4  | 0.62  | 0.97 |   |  |
|           | 0.8        | 2.24 2.42  | 0.94 2.35 | 2.24  | 3.84  |      |      |       |      |   |  |
| GENE2720X | 13190_s_at | 13190_s_at | 1         | 0.06  | 0.28  | 0.48 | 0.19 | 0.37  | 0.39 |   |  |
|           | 0.23       | 1.19 1.07  | 0.4 1.57  | 1.21  | 1.82  |      |      |       |      |   |  |
| GENE2557X | 15140_s_at | 15140_s_at | 1         | 0.18  | 0.47  | 0.32 | 0.3  | 0.24  | 0.62 |   |  |
|           | 0.31       | 1.08 0.96  | 0.09 1.04 | 1.21  | 2.08  |      |      |       |      |   |  |
| GENE2564X | 14978_at   | 14978_at   | 1         | 0.2   | 0.58  | 0.65 | 0.53 | 1.27  | 1.87 |   |  |
|           | 0.07       | 2.13 1.85  | 0.69 2.68 | 2.15  | 3.53  |      |      |       |      |   |  |
| GENE2844X | 16130_s_at | 16130_s_at | 1         | -0.32 | -0.56 | 1.06 | 1.09 | 0.36  | 1.89 |   |  |
|           | 1.26       | 0.77 2.32  | 1.48 2.5  | 4.1   | 4.61  |      |      |       |      |   |  |
| GENE2843X | 16440_at   | 16440_at   | 1         | 0.24  | -1.03 | 1.97 | 1.38 | 0.54  | 1.81 |   |  |
|           | 2.06       | 0.85 3.02  | 2.07 2.12 | 2.9   | 3.94  |      |      |       |      |   |  |
| GENE2842X | 13706_at   | 13706_at   | 1         | 0.01  | -0.76 | 0.57 | 0.07 | -0.07 | 0.76 |   |  |
|           | 0.37       | 0.31 1.6   | 0.79 0.98 | 1.68  | 1.68  |      |      |       |      |   |  |
| GENE2593X | 19741_at   | 19741_at   | 1         | -0.24 | -0.73 | 0.8  | 0.29 | -0.4  | 1.1  |   |  |
|           | 0.29       | 0.93 1.61  | 0 1.62    | 2.17  | 1.95  |      |      |       |      |   |  |
| GENE2592X | 13480_at   | 13480_at   | 1         | -0.01 | -0.27 | 0.23 | 0.22 | -0.15 | 0.35 |   |  |
|           | 0.33       | 0.67 0.95  | 0.13 0.94 | 0.86  | 1.33  |      |      |       |      |   |  |
| GENE2591X | 18622_g_at | 18622_g_at | 1         | 0.22  | -0.27 | 0.05 | 0.2  | 0.17  | 0.66 |   |  |
|           | 0.28       | 0.82 0.85  | 0.16 0.91 | 1.16  | 1.45  |      |      |       |      |   |  |
| GENE2569X | 12736_f_at | 12736_f_at | 1         | -0.32 | 0.24  | 1.42 | 0.48 | 0.85  | 2.3  |   |  |
|           | 0.26       | 1.08 2.03  | 1.26 1.52 | 2.07  | 3.51  |      |      |       |      |   |  |
| GENE2556X | 17484_at   | 17484_at   | 1         | 0     | 0     | 2.37 | 0    | 0.67  | 3.35 | 0 |  |
|           | 2          | 4.52 0     | 1.84 4.36 | 5.59  |       |      |      |       |      |   |  |
| GENE2555X | 12449_s_at | 12449_s_at | 1         | -0.12 | 0.21  | 1.9  | 0    | 1.92  | 4.81 | - |  |
|           | 0.12       | 0.65 3.45  | 0.5 1.75  | 3.9   | 4.69  |      |      |       |      |   |  |
| GENE2554X | 16429_at   | 16429_at   | 1         | 0.05  | -0.14 | 0.61 | 0.34 | 0.07  | 0.92 |   |  |
|           | 0.2        | 0.12 0.73  | 0.09 0.35 | 0.97  | 1.11  |      |      |       |      |   |  |
| GENE2576X | 20479_i_at | 20479_i_at | 1         | -0.67 | 1.5   | 2.19 | 0.16 | 2.27  | 2.71 |   |  |
|           | 1.28       | 2.18 3.37  | 0.85 3.18 | 4.87  | 4.79  |      |      |       |      |   |  |
| GENE2575X | 20480_s_at | 20480_s_at | 1         | -0.85 | 1.11  | 1.48 | 0.76 | 1.45  | 2.28 |   |  |
|           | 1.27       | 1.66 2.56  | 1.01 2.65 | 3.91  | 3.94  |      |      |       |      |   |  |
| GENE2574X | 17511_s_at | 17511_s_at | 1         | 0.48  | 2.17  | 4.76 | 2    | 2.73  | 5.9  |   |  |
|           | 1.48       | 2.7 5.99   | 1.13 4.41 | 7.33  | 7.04  |      |      |       |      |   |  |
| GENE2573X | 15485_at   | 15485_at   | 1         | 0.06  | 1.22  | 2.53 | 1.12 | 1.2   | 2.34 |   |  |
|           | 0.96       | 1.58 3.03  | 1.39 2.09 | 3.16  | 3.07  |      |      |       |      |   |  |
| GENE2572X | 18224_s_at | 18224_s_at | 1         | -0.09 | 1.34  | 3.6  | 1.24 | 1.39  | 3.74 |   |  |
|           | 1.41       | 2.48 4.04  | 1.07 3.45 | 4.92  | 5.9   |      |      |       |      |   |  |
| GENE2571X | 20215_s_at | 20215_s_at | 1         | -0.08 | 0.28  | 0.83 | 0.08 | 0.34  | 0.82 |   |  |
|           | 0.44       | 0.48 0.94  | 0.32 0.7  | 1.1   | 1.26  |      |      |       |      |   |  |

|           |            |            |      |       |          |       |       |      |      |   |  |
|-----------|------------|------------|------|-------|----------|-------|-------|------|------|---|--|
| GENE2566X | 18908_i_at | 18908_i_at | 1    | 0.78  | 0.4      | 0.85  | 0.25  | 1.25 | 1.46 |   |  |
|           | 1.11       | 0.88       | 1.25 | 0.6   | 1.15     | 2.03  | 2.27  |      |      |   |  |
| GENE2565X | 18909_s_at | 18909_s_at | 1    | 0.64  | 0.21     | 0.55  | 0.37  | 0.82 | 1.63 |   |  |
|           | 0.61       | 0.58       | 1.23 | 0.7   | 0.81     | 1.63  | 1.89  |      |      |   |  |
| GENE1959X | 12777_i_at | 12777_i_at | 1    | 0.21  | 0.1      | 0.55  | 0.44  | 0.62 | 1.22 |   |  |
|           | 0.31       | 0.54       | 0.84 | 0.16  | 0.82     | 1.79  | 1     |      |      |   |  |
| GENE2607X | 16916_s_at | 16916_s_at | 1    | 1.34  | -0.06    | 2.7   | 1.26  | 0.27 | 2.88 |   |  |
|           | 2.51       | 2.44       | 4.29 | 2.3   | 2.61     | 3.97  | 3.49  |      |      |   |  |
| GENE2606X | 16465_at   | 16465_at   | 1    | 1.15  | -0.00404 |       | 2.68  | 1.17 | 0.31 |   |  |
|           | 3.02       | 2.2        | 2.06 | 3.97  | 1.72     | 2.2   | 3.78  | 3.44 |      |   |  |
| GENE2605X | 13285_at   | 13285_at   | 1    | 0.92  | -0.59    | 1.44  | 0.48  | 0.19 | 2.49 |   |  |
|           | 1.43       | 1.51       | 2.99 | 1.05  | 1.55     | 2.97  | 1.72  |      |      |   |  |
| GENE2604X | 12989_at   | 12989_at   | 1    | 0     | -0.85    | 4.52  | 1.58  | 0.56 | 6.15 |   |  |
|           | 2.96       | 3.57       | 7.94 | 2.53  | 4.66     | 8.71  | 7.97  |      |      |   |  |
| GENE2603X | 15582_s_at | 15582_s_at | 1    | 0.47  | 0.06     | 1.44  | 0.57  | 0.2  | 1.5  |   |  |
|           | 0.85       | 1.63       | 2.63 | 0.75  | 1.86     | 2.87  | 2.37  |      |      |   |  |
| GENE2602X | 20023_at   | 20023_at   | 1    | 0.43  | -0.11    | 1.68  | 0.45  | 0.44 | 1.76 |   |  |
|           | 0.49       | 1.5        | 2.47 | 0.43  | 1.31     | 2.75  | 2.3   |      |      |   |  |
| GENE2601X | 18935_at   | 18935_at   | 1    | 0     | 0.34     | 1.84  | 0.2   | 0.71 | 2.32 |   |  |
|           | 0.82       | 2          | 3.4  | 1.05  | 1.82     | 3.43  | 2.48  |      |      |   |  |
| GENE2600X | 19110_s_at | 19110_s_at | 1    | -0.26 | 0.29     | 2.64  | 0.73  | 0.69 | 2.64 | 2 |  |
|           | 1.82       | 3.24       | 1.32 | 1.97  | 3.83     | 2.33  |       |      |      |   |  |
| GENE2599X | 12092_at   | 12092_at   | 1    | -0.16 | 0.17     | 1.97  | 0.25  | 0.22 | 1.69 |   |  |
|           | 0.95       | 1.32       | 2.45 | 1.18  | 1.31     | 2.56  | 1.67  |      |      |   |  |
| GENE1895X | 15665_at   | 15665_at   | 1    | 0.89  | 0.67     | 3.51  | 0.93  | 1.2  | 3.84 |   |  |
|           | 2.45       | 1.11       | 3.91 | 2.42  | 1.23     | 4.39  | 3.82  |      |      |   |  |
| GENE1894X | 18738_f_at | 18738_f_at | 1    | 1     | 0.23     | 1.38  | 0     | 0.55 | 1.91 |   |  |
|           | 1.11       | 0.55       | 1.97 | 1.11  | 0.81     | 2.05  | 2.76  |      |      |   |  |
| GENE2733X | 17854_at   | 17854_at   | 1    | 0     | 1        | 1.5   | 0     | 1.26 | 1.75 | 0 |  |
|           | 3.1        | 1.94       | 0    | 2.53  | 2.08     | 4.26  |       |      |      |   |  |
| GENE2732X | 17744_s_at | 17744_s_at | 1    | 0.18  | 1.17     | 1.07  | 0.06  | 1.64 | 1.23 | - |  |
|           | 0.19       | 2.34       | 1.36 | -0.19 | 2.1      | 1.34  | 3.33  |      |      |   |  |
| GENE2731X | 14923_at   | 14923_at   | 1    | 0.2   | 0.27     | 0.18  | -0.12 | 0.97 | 1.01 |   |  |
|           | 0.08       | 1.52       | 0.78 | -0.74 | 1.51     | 0.96  | 2.38  |      |      |   |  |
| GENE2730X | 13261_at   | 13261_at   | 1    | 0.12  | 0.68     | 0.48  | -0.11 | 0.5  | 0.15 |   |  |
|           | 0.34       | 1.48       | 0.74 | -0.18 | 1.45     | 1.08  | 2.14  |      |      |   |  |
| GENE2729X | 14100_at   | 14100_at   | 1    | 0.32  | 0.27     | 0.18  | 0.03  | 0.35 | 0.18 |   |  |
|           | 0.21       | 0.9        | 0.33 | -0.12 | 0.45     | 0.54  | 1.11  |      |      |   |  |
| GENE2641X | 17578_at   | 17578_at   | 1    | 0     | 0.25     | -0.21 | -0.28 | 0.53 | 0.37 |   |  |
|           | 0.26       | 1.5        | 0.73 | 0.38  | 1.43     | 0.98  | 1.83  |      |      |   |  |
| GENE2640X | 15577_s_at | 15577_s_at | 1    | 0.24  | 0.18     | 0.09  | 0.04  | 0.21 | 0.15 |   |  |
|           | 0.38       | 1.13       | 0.63 | 0.35  | 1.34     | 0.84  | 1.7   |      |      |   |  |
| GENE2639X | 13604_at   | 13604_at   | 1    | 0.13  | 0.28     | 0.02  | -0.08 | 0.16 | 0.3  |   |  |
|           | 0.21       | 1.38       | 0.86 | 0.18  | 1.13     | 0.92  | 1.88  |      |      |   |  |
| GENE2638X | 19257_s_at | 19257_s_at | 1    | -0.36 | 0.08     | 0.05  | -0.84 | 0.52 | 0.82 | - |  |
|           | 0.16       | 1.85       | 1.67 | 0.15  | 2.19     | 1.91  | 4.35  |      |      |   |  |
| GENE2637X | 15580_at   | 15580_at   | 1    | -0.15 | -0.01    | 0.05  | 0.07  | 0.3  | 0.34 | - |  |
|           | 0.1        | 1.11       | 1.11 | 0.31  | 1.16     | 0.97  | 2.11  |      |      |   |  |
| GENE2636X | 13119_at   | 13119_at   | 1    | 0     | -0.09    | 0.08  | -0.07 | 0.25 | 0.4  | - |  |
|           | 0.03       | 1.16       | 0.82 | 0.18  | 1.15     | 0.86  | 1.85  |      |      |   |  |
| GENE2635X | 18651_at   | 18651_at   | 1    | -0.18 | 0.22     | -0.08 | -0.01 | 0.42 | 0.24 |   |  |
|           | 0.04       | 0.57       | 0.25 | 0.22  | 0.68     | 0.51  | 1.03  |      |      |   |  |
| GENE2766X | 16203_at   | 16203_at   | 1    | 1.92  | 2.13     | 1.77  | 0.26  | 3.1  | 2.46 |   |  |
|           | 0.48       | 4.58       | 3.73 | 3.17  | 4.56     | 4.31  | 5.31  |      |      |   |  |
| GENE2744X | 13174_r_at | 13174_r_at | 1    | 0.32  | 0.53     | 0.78  | 0.09  | 0.48 | 0.34 |   |  |
|           | 0.28       | 0.8        | 0.85 | 0.4   | 0.67     | 0.64  | 1.28  |      |      |   |  |

|           |            |            |      |       |       |       |       |      |      |   |  |
|-----------|------------|------------|------|-------|-------|-------|-------|------|------|---|--|
| GENE2644X | 14043_at   | 14043_at   | 1    | -0.33 | 0.6   | 0.51  | -0.05 | 0.56 | 0.58 |   |  |
|           | 0.04       | 0.96       | 1.02 | 0.49  | 0.73  | 0.65  | 0.87  |      |      |   |  |
| GENE2738X | 18953_at   | 18953_at   | 1    | 0.45  | 1.5   | 1.04  | -0.65 | 2.18 | 1.29 | - |  |
|           | 0.44       | 1.94       | 1.33 | 0.45  | 2.2   | 1.85  | 3.24  |      |      |   |  |
| GENE2737X | 15798_at   | 15798_at   | 1    | -0.3  | 0.94  | 0.48  | -0.03 | 1.68 | 0.88 | - |  |
|           | 0.5        | 1.74       | 1.26 | -0.08 | 1.94  | 1.17  | 2.35  |      |      |   |  |
| GENE2560X | 18234_at   | 18234_at   | 1    | -0.22 | 0.54  | 0.56  | 0.23  | 0.7  | 0.71 | - |  |
|           | 0.26       | 0.85       | 0.95 | -0.01 | 0.45  | 1.03  | 1.51  |      |      |   |  |
| GENE2688X | 13275_f_at | 13275_f_at | 1    | 1.58  | 0     | 1.26  | 0.67  | 1.26 | 1.13 | 0 |  |
|           | 3.78       | 3.82       | 1    | 4.39  | 3.56  | 3.17  |       |      |      |   |  |
| GENE2687X | 13450_at   | 13450_at   | 1    | 0.19  | 0.21  | 0.52  | 0.29  | 0.5  | 0.15 |   |  |
|           | 0.17       | 1.13       | 1.01 | 0.29  | 1.37  | 1.18  | 0.95  |      |      |   |  |
| GENE2686X | 18557_at   | 18557_at   | 1    | 0.5   | 0.25  | 0.74  | 0.28  | 0.83 | 0.61 |   |  |
|           | 0.5        | 1.43       | 1.55 | 0.31  | 1.67  | 1.3   | 1.27  |      |      |   |  |
| GENE2679X | 14656_i_at | 14656_i_at | 1    | 0.28  | 0.8   | 0.26  | 0.51  | 1.52 | 1.8  |   |  |
|           | 0.19       | 2.8        | 1.88 | 0.19  | 2.85  | 2.32  | 2.26  |      |      |   |  |
| GENE2678X | 20224_at   | 20224_at   | 1    | 0.05  | 0.48  | 0.29  | 0.51  | 1.37 | 1.29 |   |  |
|           | 0.23       | 1.76       | 1.51 | 0.19  | 2.32  | 1.86  | 1.23  |      |      |   |  |
| GENE2677X | 17192_s_at | 17192_s_at | 1    | -0.04 | 0.41  | 0.4   | 0.48  | 0.49 | 0.72 | - |  |
|           | 0.18       | 1.1        | 1.19 | 0.28  | 1.23  | 1.06  | 0.83  |      |      |   |  |
| GENE2725X | 20323_at   | 20323_at   | 1    | -0.07 | 0     | -0.7  | 0.7   | 2.1  | 2.2  |   |  |
|           | 0.7        | 3.62       | 2.1  | 0.79  | 4.82  | 2.86  | 4.15  |      |      |   |  |
| GENE2724X | 16343_at   | 16343_at   | 1    | -0.22 | 0.18  | 0.13  | 0.34  | 0.79 | 0.43 |   |  |
|           | 0.44       | 1.35       | 0.74 | 0.47  | 1.34  | 0.87  | 1.14  |      |      |   |  |
| GENE2723X | 18621_at   | 18621_at   | 1    | 0.12  | 0.33  | -0.07 | 0.25  | 0.73 | 0.28 |   |  |
|           | 0.05       | 1.08       | 0.43 | 0.29  | 1.11  | 0.76  | 0.93  |      |      |   |  |
| GENE2298X | 18305_at   | 18305_at   | 1    | -0.11 | 0.09  | 0.14  | -0.09 | 0.5  | 0.28 |   |  |
|           | 0.01       | 1.01       | 0.34 | -0.04 | 0.79  | 0.69  | 0.62  |      |      |   |  |
| GENE2661X | 12851_s_at | 12851_s_at | 1    | 0     | 1     | 0.84  | 0     | 0.67 | 1.76 |   |  |
|           | 0.84       | 2.48       | 2.88 | 0.48  | 2.84  | 3.6   | 3.8   |      |      |   |  |
| GENE2660X | 19411_at   | 19411_at   | 1    | 0.35  | 0.57  | 0.69  | 0.5   | 0.93 | 1.48 |   |  |
|           | 0.62       | 2.38       | 2.21 | 0.55  | 2.83  | 2.99  | 3.29  |      |      |   |  |
| GENE2659X | 16103_s_at | 16103_s_at | 1    | 0.41  | 0.45  | 0.66  | 0.16  | 0.51 | 0.72 |   |  |
|           | 0.54       | 1.56       | 1.66 | 0.46  | 1.78  | 1.74  | 2.28  |      |      |   |  |
| GENE2658X | 15594_s_at | 15594_s_at | 1    | 0.48  | 1.33  | 1.71  | 0.38  | 1.34 | 1.96 |   |  |
|           | 0.78       | 3.29       | 3.79 | 1.48  | 3.99  | 4.47  | 4.35  |      |      |   |  |
| GENE2657X | 13137_at   | 13137_at   | 1    | 0.57  | 0.84  | 1.02  | 0.52  | 1    | 1.47 |   |  |
|           | 0.6        | 2.03       | 2.38 | 0.43  | 2.29  | 2.82  | 2.67  |      |      |   |  |
| GENE2656X | 17482_at   | 17482_at   | 1    | 0.37  | 0.16  | 0.67  | 0.26  | 0.48 | 1.02 |   |  |
|           | 0.52       | 1.43       | 1.43 | 0.4   | 1.59  | 1.75  | 1.59  |      |      |   |  |
| GENE2655X | 20529_at   | 20529_at   | 1    | 0.25  | 0.73  | 0.68  | 0.37  | 0.71 | 0.5  |   |  |
|           | 0.74       | 2.1        | 1.92 | 0.38  | 1.96  | 2.17  | 1.83  |      |      |   |  |
| GENE2654X | 17851_at   | 17851_at   | 1    | 0.26  | 0.35  | 0.28  | 0.03  | 0.35 | 0.22 |   |  |
|           | 0.51       | 1          | 0.76 | 0.24  | 0.96  | 1.25  | 0.92  |      |      |   |  |
| GENE2653X | 14520_at   | 14520_at   | 1    | 0.14  | -0.11 | 0.4   | -0.15 | 0.45 | 0.34 |   |  |
|           | 0.27       | 0.99       | 0.85 | 0.2   | 0.69  | 1.18  | 1.06  |      |      |   |  |
| GENE2652X | 13588_at   | 13588_at   | 1    | -0.28 | 1.75  | 2.03  | -0.04 | 1.58 | 2.07 | - |  |
|           | 0.11       | 2.83       | 2.74 | -0.27 | 3.13  | 3.21  | 3.95  |      |      |   |  |
| GENE2651X | 19624_at   | 19624_at   | 1    | -0.2  | 1.51  | 1.15  | -0.38 | 1.32 | 1.62 |   |  |
|           | 0.3        | 2.63       | 2.32 | 0.33  | 2.77  | 2.55  | 3.21  |      |      |   |  |
| GENE2563X | 19546_at   | 19546_at   | 1    | 0     | 1.13  | 2.24  | 0     | 1.84 | 3.61 | 0 |  |
|           | 4.54       | 5.31       | 0    | 5.46  | 5.25  | 6.38  |       |      |      |   |  |
| GENE2562X | 19881_at   | 19881_at   | 1    | 0.01  | 0.27  | 0.41  | 0     | 0.68 | 1.11 | - |  |
|           | 0.12       | 1.16       | 1.27 | 0     | 1.45  | 1.54  | 1.46  |      |      |   |  |
| GENE2650X | 16301_at   | 16301_at   | 1    | 0.27  | 1.04  | 1.51  | 0     | 1.3  | 1.69 |   |  |
|           | 0.27       | 2.08       | 2.55 | 0.03  | 1.53  | 1.99  | 2.82  |      |      |   |  |

|           |            |            |            |       |       |      |       |       |      |   |
|-----------|------------|------------|------------|-------|-------|------|-------|-------|------|---|
| GENE2582X | 13627_at   | 13627_at   | 1          | 0     | 1.76  | 3.13 | 0.26  | 2.13  | 3.4  | 2 |
|           | 3.94       | 5.54 1.58  | 5.12 6.08  | 6.48  |       |      |       |       |      |   |
| GENE2581X | 16405_at   | 16405_at   | 1          | 0     | 0.84  | 1.92 | 0     | 1     | 1.84 |   |
|           | 0.48       | 1.92 2.63  | 0.48 2.32  | 3.35  | 3.76  |      |       |       |      |   |
| GENE2580X | 20194_at   | 20194_at   | 1          | 0.58  | 1.96  | 3.39 | 0.87  | 1.71  | 3.16 |   |
|           | 0.41       | 3.39 4.18  | 0.95 3.8   | 4.68  | 5.26  |      |       |       |      |   |
| GENE2579X | 16058_s_at | 16058_s_at | 1          | 0.28  | 0.95  | 1.59 | 0.27  | 0.93  | 1.72 |   |
|           | 0.32       | 1.7 2.48   | 0.27 2.07  | 2.87  | 2.41  |      |       |       |      |   |
| GENE2578X | 17907_s_at | 17907_s_at | 1          | 0.84  | 1.58  | 3.32 | 1.37  | 1.58  | 4.23 |   |
|           | 1.26       | 4 5.24     | 0 4.49     | 5.75  | 6.15  |      |       |       |      |   |
| GENE2577X | 13259_s_at | 13259_s_at | 1          | 0.34  | 0.41  | 1.12 | 0.42  | 0.47  | 1.28 |   |
|           | 0.24       | 1.54 2.02  | 0.31 1.87  | 2.35  | 2.5   |      |       |       |      |   |
| GENE2621X | 20245_s_at | 20245_s_at | 1          | 0.39  | 0.59  | 0.08 | 0.39  | 0.92  | 0.62 | - |
|           | 0.35       | 1.31 0.4   | -0.24 1.87 | 0.91  | 4.88  |      |       |       |      |   |
| GENE2620X | 17007_at   | 17007_at   | 1          | 0.3   | 0.5   | 0.39 | 0.14  | 0.81  | 0.44 |   |
|           | 0.17       | 0.98 0.47  | 0.2 0.96   | 0.71  | 2.07  |      |       |       |      |   |
| GENE2618X | 19407_at   | 19407_at   | 1          | 0.43  | 0.3   | 0.56 | 0.41  | 0.32  | 0.83 |   |
|           | 0.31       | 0.91 0.59  | -0.16 0.86 | 0.81  | 2.38  |      |       |       |      |   |
| GENE2619X | 20134_s_at | 20134_s_at | 1          | 0     | 0     | 0.46 | 0.9   | 0.27  | 0.72 |   |
|           | 0.12       | 0.5 0.75   | 0.12 0.73  | 1.16  | 3.56  |      |       |       |      |   |
| GENE2617X | 12742_at   | 12742_at   | 1          | 0.2   | 0.17  | 0.2  | 0.06  | 0.16  | 0.1  |   |
|           | 0.22       | 0.36 0.47  | -0.06 0.26 | 0.49  | 1.25  |      |       |       |      |   |
| GENE2615X | 16233_at   | 16233_at   | 1          | 0     | 0     | 0    | 0.84  | 0.26  | 1.48 |   |
|           | 0.26       | 1.37 2     | 0 3.13     | 4.23  | 4.57  |      |       |       |      |   |
| GENE2614X | 20247_at   | 20247_at   | 1          | 0     | 0     | 0.84 | 0     | 0     | 1    | 0 |
|           | 2.2        | 3.9 0      | 4.01 5.51  | 5.12  |       |      |       |       |      |   |
| GENE2613X | 18213_at   | 18213_at   | 1          | 0     | 0     | 0.84 | 0     | 0     | 1.48 | 0 |
|           | 3          | 3.03 0     | 3.53 4.8   | 4.54  |       |      |       |       |      |   |
| GENE2612X | 15199_s_at | 15199_s_at | 1          | 0.22  | 0.36  | 0.85 | 0.55  | 0.16  | 1.15 |   |
|           | 0.3        | 1.37 2.2   | 0.45 2.38  | 3.11  | 2.93  |      |       |       |      |   |
| GENE2611X | 13381_at   | 13381_at   | 1          | 0     | 0     | 0    | 0     | 1.67  | 3.63 | 0 |
|           | 2.8        | 4.36 0     | 5.21 6.78  | 6.67  |       |      |       |       |      |   |
| GENE2610X | 18650_s_at | 18650_s_at | 1          | -0.04 | 0.09  | 0.1  | -0.01 | 0.3   | 0.35 | - |
|           | 0.03       | 0.63 0.57  | 0.02 0.85  | 0.93  | 1.06  |      |       |       |      |   |
| GENE2584X | 20356_at   | 20356_at   | 1          | 0     | 0.36  | 3.07 | 0.84  | 2.32  | 4.75 | 0 |
|           | 3.61       | 5.76 1.48  | 5.21 7.53  | 8.45  |       |      |       |       |      |   |
| GENE2561X | 19819_at   | 19819_at   | 1          | 0.3   | 0.36  | 0.72 | 0.21  | 0.45  | 1.13 | - |
|           | 0.38       | 0.88 1.29  | -0.2 1.38  | 1.82  | 1.92  |      |       |       |      |   |
| GENE2559X | 12002_at   | 12002_at   | 1          | -0.02 | 0.59  | 1    | -0.34 | 0.86  | 1.69 |   |
|           | 0.19       | 1.45 1.95  | 0 2.06     | 2.51  | 3.77  |      |       |       |      |   |
| GENE2558X | 14660_at   | 14660_at   | 1          | 0.08  | 0.47  | 0.6  | -0.32 | 0.14  | 0.55 |   |
|           | 0.07       | 1.04 1.12  | 0.08 1.17  | 1.33  | 2.24  |      |       |       |      |   |
| GENE1754X | 15342_at   | 15342_at   | 1          | 0     | 0.26  | 0.96 | -0.32 | 0.48  | 0.92 | - |
|           | 0.15       | 1.51 1.91  | -0.32 1.32 | 1.85  | 2.11  |      |       |       |      |   |
| GENE1753X | 13647_at   | 13647_at   | 1          | -0.43 | 0.35  | 0.55 | -0.48 | 0.13  | 0.54 | - |
|           | 0.27       | 1.15 1.38  | -0.17 1.11 | 1.12  | 1.9   |      |       |       |      |   |
| GENE1758X | 16272_at   | 16272_at   | 1          | -0.37 | -0.36 | 0.83 | -0.37 | 0.15  | 0.83 | - |
|           | 0.24       | 2.38 2.66  | -0.24 3    | 3.79  | 4.72  |      |       |       |      |   |
| GENE1757X | 18930_at   | 18930_at   | 1          | -0.47 | -0.08 | 0.33 | -0.05 | 0.16  | 0.65 | - |
|           | 0.73       | 1.3 1.58   | -0.39 1.91 | 2.49  | 2.97  |      |       |       |      |   |
| GENE1756X | 12921_s_at | 12921_s_at | 1          | -0.29 | 0.05  | 0.52 | -0.09 | -0.29 | 0.39 | - |
|           | 0.16       | 0.72 1.1   | 0.16 0.69  | 1.03  | 1.92  |      |       |       |      |   |
| GENE1755X | 12920_at   | 12920_at   | 1          | -0.26 | -0.06 | 0.5  | -0.34 | -0.18 | 0.47 | - |
|           | 0.33       | 0.57 0.93  | -0.21 0.52 | 0.87  | 1.24  |      |       |       |      |   |
| GENE1752X | 17041_s_at | 17041_s_at | 1          | -0.28 | 0.49  | 0.58 | -0.63 | 0.06  | 0.32 | - |
|           | 0.31       | 1.21 2.06  | -0.85 0.86 | 2.37  | 2.59  |      |       |       |      |   |



|           |            |            |       |       |       |       |       |       |       |   |
|-----------|------------|------------|-------|-------|-------|-------|-------|-------|-------|---|
| GENE2616X | 14461_at   | 14461_at   | 1     | 0     | 0     | 0     | 1.26  | 1.37  | 0.84  | 0 |
| 2.48      | 1.67       | 0          | 5.17  | 5.4   | 3.66  |       |       |       |       |   |
| GENE2609X | 19530_at   | 19530_at   | 1     | 0     | 0     | -0.26 | 0     | 0     | -0.26 | 0 |
| 0         | 2.05       | 0          | 2.32  | 3.19  | 2.32  |       |       |       |       |   |
| GENE2608X | 14954_i_at | 14954_i_at | 1     | 0.08  | -0.43 | 0.29  | 0.28  | -0.56 | 0.35  |   |
| 0.16      | 0.08       | 0.67       | -0.49 | 0.92  | 1.5   | 0.99  |       |       |       |   |
| GENE1742X | 18601_s_at | 18601_s_at | 1     | -0.53 | -0.29 | 0.24  | -0.07 | -0.18 | -0.46 | - |
| 0.56      | 1.18       | 0.96       | 0.01  | 1.26  | 0.65  | 1.52  |       |       |       |   |
| GENE1741X | 17318_at   | 17318_at   | 1     | -0.18 | -0.08 | -0.25 | 0.34  | -0.02 | 0     | - |
| 0.12      | 0.7        | 0.6        | 0     | 0.89  | 0.37  | 1.79  |       |       |       |   |
| GENE1740X | 14468_at   | 14468_at   | 1     | -0.64 | -1.05 | 0.38  | -0.16 | 0.05  | 0.25  |   |
| 0.32      | 0.43       | 0.54       | 0.42  | 0.78  | 0.38  | 1.9   |       |       |       |   |
| GENE2956X | 20032_at   | 20032_at   | 1     | 0.72  | -0.22 | -0.08 | 0.35  | 0.67  | 0.91  |   |
| 0.84      | 0.27       | 0.49       | 0.51  | 0.94  | 1.26  | 1.65  |       |       |       |   |
| GENE2955X | 13102_at   | 13102_at   | 1     | 0.39  | -0.26 | -0.05 | 0.51  | 0.21  | 0.92  |   |
| 1.02      | 0.38       | 0.41       | 0.71  | 0.77  | 1.01  | 1.1   |       |       |       |   |
| GENE2966X | 18263_at   | 18263_at   | 1     | 1.43  | -0.82 | 0.26  | 1.78  | 0.36  | 1.11  |   |
| 2.84      | 2.33       | 2.57       | 2.68  | 2.32  | 3.19  | 4.33  |       |       |       |   |
| GENE2965X | 12892_g_at | 12892_g_at | 1     | 0.92  | -0.52 | 0.45  | 1.77  | 0.68  | 1.91  |   |
| 2.68      | 1.58       | 2.53       | 2.65  | 2.36  | 3.76  | 5.09  |       |       |       |   |
| GENE2964X | 12891_at   | 12891_at   | 1     | 0.91  | -0.48 | 0.4   | 1.71  | 0.68  | 1.68  |   |
| 2.53      | 1.48       | 2.31       | 2.7   | 2.22  | 3.58  | 4.76  |       |       |       |   |
| GENE2942X | 18126_at   | 18126_at   | 1     | 1.16  | -0.63 | -0.41 | 1.36  | 0.58  | 1.17  |   |
| 1.77      | 1.14       | 2.12       | 1.69  | 1.61  | 2.08  | 2.26  |       |       |       |   |
| GENE2963X | 14763_at   | 14763_at   | 1     | 1.18  | 0.32  | 0.09  | 1.51  | 1.08  | 1.03  |   |
| 2.62      | 2.47       | 1.68       | 2.47  | 3.18  | 2.62  | 4.27  |       |       |       |   |
| GENE2962X | 13094_at   | 13094_at   | 1     | 0.77  | 0.35  | 0.28  | 0.89  | 0.88  | 0.87  |   |
| 1.77      | 1.47       | 1.07       | 1.75  | 2.07  | 1.95  | 3.03  |       |       |       |   |
| GENE2961X | 12764_f_at | 12764_f_at | 1     | 1.18  | 0.2   | -0.23 | 1.17  | 0.91  | 1.22  |   |
| 1.42      | 1.24       | 1.25       | 1.74  | 1.69  | 1.83  | 2.84  |       |       |       |   |
| GENE2929X | 15526_at   | 15526_at   | 1     | 1.13  | -0.41 | 0.19  | 2.32  | 1.52  | 1.77  |   |
| 1.92      | 1.85       | 1.51       | 1.92  | 3.32  | 3.21  | 3.17  |       |       |       |   |
| GENE2928X | 17051_s_at | 17051_s_at | 1     | 1.32  | 0.16  | 0.34  | 1.8   | 1.07  | 1.01  |   |
| 1.54      | 1.75       | 1.34       | 2.07  | 2.53  | 2.29  | 2.67  |       |       |       |   |
| GENE2946X | 16409_at   | 16409_at   | 1     | 1.26  | -0.12 | 0     | 2.13  | 0.93  | 1.27  |   |
| 2.32      | 1.7        | 1.34       | 2.84  | 2.58  | 2.11  | 2.36  |       |       |       |   |
| GENE2913X | 17303_s_at | 17303_s_at | 1     | 1.45  | 0.25  | 0.61  | 2.18  | 1.46  | 1.78  |   |
| 3.31      | 1.93       | 1.99       | 3.7   | 2.69  | 2.79  | 3.2   |       |       |       |   |
| GENE2970X | 13656_at   | 13656_at   | 1     | 2     | 0.23  | 1.48  | 2     | 1.17  | 2.79  |   |
| 3.47      | 3.08       | 4.46       | 2.98  | 3.52  | 5.09  | 5.66  |       |       |       |   |
| GENE2969X | 19991_at   | 19991_at   | 1     | 2.33  | 0.32  | 1.17  | 3.67  | 1.88  | 3.48  |   |
| 4.19      | 3.86       | 4.25       | 4.09  | 4.56  | 5.19  | 6.4   |       |       |       |   |
| GENE2968X | 16817_s_at | 16817_s_at | 1     | 1.74  | 0.27  | 0.84  | 2.28  | 1.45  | 2.49  |   |
| 3.49      | 2.06       | 3.15       | 3.42  | 2.89  | 4.26  | 4.92  |       |       |       |   |
| GENE2967X | 17894_at   | 17894_at   | 1     | 1.23  | 0.37  | 1.5   | 1.6   | 0.81  | 2.07  |   |
| 2.33      | 1.78       | 2.41       | 2.39  | 1.98  | 2.74  | 4.4   |       |       |       |   |
| GENE2931X | 17899_at   | 17899_at   | 1     | 1.5   | 1.21  | 0.66  | 1.61  | 1.06  | 0.99  |   |
| 1.72      | 2.24       | 2.71       | 1.86  | 2.59  | 3.12  | 3.56  |       |       |       |   |
| GENE2916X | 20433_at   | 20433_at   | 1     | 1.75  | 1.26  | 1.47  | 1.89  | 1.51  | 1.22  |   |
| 2.18      | 2.87       | 2.7        | 2.64  | 2.77  | 2.89  | 4.23  |       |       |       |   |
| GENE2915X | 14959_at   | 14959_at   | 1     | 2.04  | 0.58  | 1.15  | 2.08  | 1.07  | 1.84  |   |
| 2.17      | 2.3        | 2.41       | 2.35  | 2.3   | 2.73  | 3.92  |       |       |       |   |
| GENE2914X | 15216_at   | 15216_at   | 1     | 1.7   | 0.82  | 0.77  | 1.55  | 0.86  | 1.15  |   |
| 1.84      | 1.6        | 1.69       | 1.68  | 1.82  | 1.93  | 3.29  |       |       |       |   |
| GENE2809X | 14609_at   | 14609_at   | 1     | 1.58  | 1.69  | 2.2   | 4.36  | 3.38  | 4.89  |   |
| 2.96      | 3.71       | 4.68       | 3.67  | 6.04  | 6.36  | 7.79  |       |       |       |   |

|           |            |            |           |      |       |       |      |      |      |
|-----------|------------|------------|-----------|------|-------|-------|------|------|------|
| GENE2808X | 15866_s_at | 15866_s_at | 1         | 0.88 | 0.52  | 0.53  | 1.24 | 0.93 | 1.06 |
|           | 1.28       | 1.17 1.42  | 1.15 1.68 | 2.05 | 2.63  |       |      |      |      |
| GENE2807X | 15137_s_at | 15137_s_at | 1         | 2.63 | 1.3   | 1.82  | 2.74 | 2.91 | 4.16 |
|           | 3.81       | 3.36 3.91  | 3.43 4.03 | 5.18 | 5.78  |       |      |      |      |
| GENE2806X | 18121_s_at | 18121_s_at | 1         | 2    | 1.52  | 1.83  | 2.72 | 2.61 | 2.58 |
|           | 2.67       | 2.83 2.76  | 2.8 3.26  | 3.1  | 5.35  |       |      |      |      |
| GENE2805X | 19178_at   | 19178_at   | 1         | 0.77 | 0.55  | 0.84  | 0.95 | 0.84 | 1.16 |
|           | 1.01       | 1.05 1.31  | 0.92 1.17 | 1.4  | 2.1   |       |      |      |      |
| GENE2959X | 13152_s_at | 13152_s_at | 1         | 1    | -0.06 | 0.4   | 1.17 | 0.56 | 1.37 |
|           | 0.99       | 0.4 1.05   | 1.29 1.18 | 1.34 | 2.51  |       |      |      |      |
| GENE2958X | 19247_at   | 19247_at   | 1         | 1.62 | 0.3   | 0.47  | 2.07 | 1.18 | 1.42 |
|           | 2.74       | 2.12 1.43  | 2.63 2.76 | 2.51 | 5.68  |       |      |      |      |
| GENE2957X | 16054_s_at | 16054_s_at | 1         | 1.15 | 0.36  | 0.02  | 1.3  | 1.08 | 1.3  |
|           | 1.37       | 1.09 0.87  | 1.32 1.37 | 1.42 | 3.63  |       |      |      |      |
| GENE2960X | 16053_i_at | 16053_i_at | 1         | 2.63 | 0.21  | 0.33  | 2.83 | 1.4  | 2.38 |
|           | 3.13       | 1.56 1.67  | 3.12 2.47 | 2.84 | 4.48  |       |      |      |      |
| GENE2852X | 15118_s_at | 15118_s_at | 1         | 1.2  | 0.26  | -0.06 | 1.29 | 0.49 | 0.77 |
|           | 1.3        | 0.9 0.81   | 1.52 1.05 | 0.91 | 2.12  |       |      |      |      |
| GENE2858X | 16357_at   | 16357_at   | 1         | 2.45 | 0.1   | -0.28 | 2.45 | 1.46 | 1.84 |
|           | 3.66       | 2.14 1.86  | 3.5 2.94  | 2.94 | 5.29  |       |      |      |      |
| GENE2857X | 14032_at   | 14032_at   | 1         | 2.58 | -0.46 | -0.14 | 3.11 | 0.84 | 1.45 |
|           | 4.17       | 2.19 2.22  | 4.24 2.76 | 2.86 | 6.1   |       |      |      |      |
| GENE2856X | 12642_at   | 12642_at   | 1         | 1.62 | 0.01  | 0.39  | 2.1  | 1.08 | 1.64 |
|           | 3.02       | 1.23 1.4   | 3.15 2.07 | 2.38 | 5.1   |       |      |      |      |
| GENE2855X | 15139_s_at | 15139_s_at | 1         | 1.11 | 0.24  | 0.42  | 1.03 | 0.23 | 0.45 |
|           | 1.21       | 0.88 0.62  | 1.07 0.88 | 0.88 | 1.54  |       |      |      |      |
| GENE2854X | 19092_at   | 19092_at   | 1         | 2.19 | 0.5   | 0.73  | 2.25 | 0.9  | 0.97 |
|           | 2.64       | 1.62 1.15  | 2.36 1.63 | 0.82 | 4.06  |       |      |      |      |
| GENE2853X | 16236_g_at | 16236_g_at | 1         | 1.67 | 0.71  | 0.65  | 1.71 | 0.7  | 0.9  |
|           | 1.48       | 1.17 1.14  | 1.93 1.35 | 0.86 | 2.96  |       |      |      |      |
| GENE2925X | 14016_s_at | 14016_s_at | 1         | 3.55 | 2.13  | 0     | 2.85 | 3.7  | 3.35 |
|           | 3.95       | 2.8 3.58   | 3.58 4.44 | 5.48 | 5.05  |       |      |      |      |
| GENE2924X | 17882_at   | 17882_at   | 1         | 0.98 | 0.29  | 0.18  | 0.94 | 0.96 | 0.83 |
|           | 1.4        | 1.02 0.9   | 1 1.54    | 1.41 | 1.54  |       |      |      |      |
| GENE2923X | 12042_at   | 12042_at   | 1         | 1.03 | 0.29  | 0.38  | 0.9  | 0.77 | 0.95 |
|           | 0.88       | 0.49 0.65  | 0.72 0.88 | 1.2  | 1.32  |       |      |      |      |
| GENE2851X | 13659_at   | 13659_at   | 1         | 3.77 | 2.35  | 1.81  | 5.02 | 2.66 | 2.76 |
|           | 4.72       | 3.72 2.64  | 4.28 4.54 | 3.79 | 5.15  |       |      |      |      |
| GENE2850X | 12307_at   | 12307_at   | 1         | 3.74 | 2.15  | 1.63  | 3.36 | 2.85 | 3.14 |
|           | 3.61       | 2.98 2.24  | 3.39 3.6  | 3.18 | 4.67  |       |      |      |      |
| GENE2849X | 20223_at   | 20223_at   | 1         | 2.97 | 1.17  | 1.37  | 2.79 | 1.47 | 1.93 |
|           | 3.44       | 2.36 1.92  | 3.37 2.6  | 2.39 | 3.58  |       |      |      |      |
| GENE2848X | 19531_at   | 19531_at   | 1         | 1.95 | 0.66  | 0.73  | 1.77 | 1.1  | 1.23 |
|           | 2.28       | 1.49 1.7   | 2.11 1.82 | 1.71 | 2.52  |       |      |      |      |
| GENE2847X | 12079_s_at | 12079_s_at | 1         | 3.32 | 2     | 1.58  | 2.58 | 1.76 | 1.76 |
|           | 3.39       | 1.26 1.84  | 2.77 2    | 2.76 | 3.35  |       |      |      |      |
| GENE2945X | 18287_at   | 18287_at   | 1         | 1.1  | -0.19 | -0.28 | 1.27 | 0.46 | 0.41 |
|           | 1.92       | 1.4 1.18   | 1.97 1.75 | 1.85 | 1.48  |       |      |      |      |
| GENE2944X | 18508_at   | 18508_at   | 1         | 1.38 | -0.3  | -0.24 | 1.75 | 1.16 | 1.27 |
|           | 3.04       | 1.74 3.01  | 2.73 3.26 | 4.06 | 1.94  |       |      |      |      |
| GENE2943X | 12123_at   | 12123_at   | 1         | 0.74 | -0.37 | -0.41 | 1.14 | 0.22 | 0.97 |
|           | 1.71       | 1.28 1.58  | 1.87 2.36 | 2.35 | 1.96  |       |      |      |      |
| GENE2922X | 19948_at   | 19948_at   | 1         | 0.67 | 0.38  | -0.1  | 0.84 | 0.12 | 0.37 |
|           | 0.8        | 0.62 0.52  | 0.48 0.78 | 1.05 | 0.83  |       |      |      |      |
| GENE2939X | 12965_at   | 12965_at   | 1         | 0.87 | 0     | 0.96  | 0.54 | 1    | 0.92 |
|           | 1.68       | 1.76 2.14  | 1.62 1.83 | 2.28 | 2.46  |       |      |      |      |

|           |            |            |           |      |       |      |      |      |      |
|-----------|------------|------------|-----------|------|-------|------|------|------|------|
| GENE2938X | 20689_at   | 20689_at   | 1         | 0.86 | 0.19  | 0.74 | 1.02 | 0.4  | 0.58 |
|           | 1.57       | 2.15 1.93  | 1.37 1.54 | 2.15 | 2.26  |      |      |      |      |
| GENE2937X | 17900_s_at | 17900_s_at | 1         | 0.77 | 0.01  | 0.63 | 0.88 | 0.21 | 0.49 |
|           | 1.29       | 1.23 1.91  | 1.29 1.3  | 1.86 | 1.31  |      |      |      |      |
| GENE2936X | 20432_at   | 20432_at   | 1         | 2    | 0.84  | 0    | 2.13 | 1.37 | 1.37 |
|           | 1.84       | 3.17 3.63  | 2.53 4.01 | 4.53 | 2.67  |      |      |      |      |
| GENE2935X | 15617_s_at | 15617_s_at | 1         | 0.62 | 0.19  | 0.5  | 1    | 0.38 | 0.74 |
|           | 0.94       | 1.73 1.54  | 0.89 1.86 | 1.82 | 1.75  |      |      |      |      |
| GENE2934X | 16940_g_at | 16940_g_at | 1         | 0.51 | -0.05 | 0.3  | 0.74 | 0.29 | 0.89 |
|           | 0.94       | 1.55 1.51  | 0.8 1.86  | 2.02 | 1.54  |      |      |      |      |
| GENE2927X | 20577_at   | 20577_at   | 1         | 1.32 | -0.08 | 0.65 | 1.37 | 0.81 | 1.74 |
|           | 1.88       | 1.64 1.61  | 1.8 2.69  | 2.49 | 2.07  |      |      |      |      |
| GENE2926X | 12233_at   | 12233_at   | 1         | 0.98 | 0.32  | 0.32 | 1    | 0.69 | 1.05 |
|           | 1.12       | 1.33 1.06  | 0.86 1.6  | 1.61 | 1.34  |      |      |      |      |
| GENE2774X | 16363_at   | 16363_at   | 1         | 1.37 | 0.26  | 1.26 | 1.37 | 2.2  | 2.2  |
|           | 2.32       | 3.17 3.1   | 2.13 3.88 | 3.94 | 2.84  |      |      |      |      |
| GENE2773X | 18605_s_at | 18605_s_at | 1         | 0.36 | -0.05 | 0.3  | 0.49 | 0.36 | 0.79 |
|           | 0.72       | 0.8 1      | 0.54 1.01 | 1.17 | 0.97  |      |      |      |      |
| GENE2950X | 18662_s_at | 18662_s_at | 1         | 1.32 | 0.7   | 0.58 | 1.51 | 1.19 | 1    |
|           | 2.76       | 2.63 2.18  | 2.36 2.76 | 2.6  | 2     |      |      |      |      |
| GENE2949X | 16753_at   | 16753_at   | 1         | 1.37 | 0.08  | 0.46 | 1.61 | 0.55 | 0.57 |
|           | 2.51       | 2.5 2.17   | 2.36 2.54 | 2.37 | 1.64  |      |      |      |      |
| GENE2462X | 15672_s_at | 15672_s_at | 1         | 1.34 | 0.36  | 1.1  | 1.55 | 0.69 | 1.39 |
|           | 2.72       | 3.27 3.48  | 2.51 3.22 | 3.66 | 1.75  |      |      |      |      |
| GENE2461X | 20242_at   | 20242_at   | 1         | 0.29 | 0.17  | 0.29 | 0.51 | 0.11 | 0.43 |
|           | 0.96       | 1.14 0.84  | 0.65 0.94 | 0.94 | 0.41  |      |      |      |      |
| GENE2464X | 20142_at   | 20142_at   | 1         | 0.93 | -0.01 | 0.99 | 1.04 | 0.48 | 1.09 |
|           | 3.27       | 3.02 2.73  | 2.71 2.86 | 3.05 | 1.98  |      |      |      |      |
| GENE2463X | 18284_at   | 18284_at   | 1         | 0.4  | 0.02  | 0.03 | 0.87 | 0.13 | 0.39 |
|           | 2.14       | 1.81 1.45  | 1.94 1.8  | 1.87 | 1.49  |      |      |      |      |
| GENE2941X | 13015_s_at | 13015_s_at | 1         | 0.98 | 0.21  | 2.17 | 1.51 | 0.86 | 2.11 |
|           | 3.37       | 2.91 3.91  | 3.07 3.2  | 4.17 | 4.81  |      |      |      |      |
| GENE2940X | 18591_at   | 18591_at   | 1         | 0.67 | 0.08  | 1.41 | 1.23 | 0.58 | 1.62 |
|           | 1.93       | 1.67 2.48  | 2.1 1.86  | 2.55 | 2.39  |      |      |      |      |
| GENE2893X | 13177_at   | 13177_at   | 1         | 0.42 | 0.44  | 1.61 | 0.48 | 0.6  | 1.51 |
|           | 2.49       | 1.6 1.99   | 2.09 1.33 | 2.09 | 2.48  |      |      |      |      |
| GENE2919X | 14882_at   | 14882_at   | 1         | 2.71 | 0.9   | 2.52 | 2.86 | 1.82 | 3.32 |
|           | 5.08       | 3.58 4.51  | 4.96 3.72 | 4.67 | 5.87  |      |      |      |      |
| GENE2918X | 14030_at   | 14030_at   | 1         | 2.14 | 0.79  | 2.14 | 1.96 | 0.89 | 2.14 |
|           | 3.21       | 2.63 3.29  | 2.96 2.32 | 3.38 | 3.94  |      |      |      |      |
| GENE2917X | 17180_at   | 17180_at   | 1         | 1.54 | 1.15  | 2.07 | 1.62 | 1.08 | 1.64 |
|           | 3.55       | 2.5 2.7    | 3.15 2.24 | 2.43 | 4.39  |      |      |      |      |
| GENE2908X | 15778_at   | 15778_at   | 1         | 1.5  | 1.8   | 2.87 | 1.73 | 1.95 | 2.17 |
|           | 3.85       | 4.12 3.89  | 3.81 3.79 | 4    | 3.9   |      |      |      |      |
| GENE2907X | 15779_g_at | 15779_g_at | 1         | 0.55 | 0.95  | 2.35 | 0.94 | 0.98 | 1.9  |
|           | 3.16       | 3.25 3.64  | 3.05 3.1  | 3.56 | 3.53  |      |      |      |      |
| GENE2906X | 16232_s_at | 16232_s_at | 1         | 1.05 | 2.21  | 2.39 | 1.05 | 1.75 | 1.75 |
|           | 3.13       | 2.65 3.45  | 3.14 2.79 | 3.11 | 4     |      |      |      |      |
| GENE2905X | 19970_s_at | 19970_s_at | 1         | 1    | 0.93  | 1.39 | 1.45 | 1.24 | 2    |
|           | 3.76       | 2.54 2.9   | 3.79 2.67 | 3.44 | 2.13  |      |      |      |      |
| GENE2904X | 15431_at   | 15431_at   | 1         | 0.9  | 0.55  | 1.83 | 1.66 | 1.08 | 1.95 |
|           | 3.8        | 2.45 2.65  | 3.69 2.51 | 3.25 | 2.73  |      |      |      |      |
| GENE2903X | 12571_s_at | 12571_s_at | 1         | 0.85 | 0.47  | 0.82 | 1.13 | 1.01 | 1.73 |
|           | 2.46       | 1.39 1.64  | 2.42 1.79 | 2.13 | 2.12  |      |      |      |      |
| GENE2899X | 17379_at   | 17379_at   | 1         | 0.29 | 0.72  | 1.21 | 1.26 | 1.17 | 1.44 |
|           | 2.8        | 2.32 1.92  | 3.12 2.46 | 2.11 | 2.72  |      |      |      |      |

|           |            |            |           |      |       |      |      |       |      |  |  |
|-----------|------------|------------|-----------|------|-------|------|------|-------|------|--|--|
| GENE2898X | 18672_s_at | 18672_s_at | 1         | 0.29 | 0.44  | 0.62 | 0.56 | 0.69  | 0.89 |  |  |
|           | 2.06       | 1.38 1.16  | 1.67 1.41 | 1.25 | 1.37  |      |      |       |      |  |  |
| GENE2892X | 17323_at   | 17323_at   | 1         | 0.35 | 0.75  | 0.9  | 0.4  | 0.85  | 1.19 |  |  |
|           | 1.81       | 0.75 1.35  | 1.84 0.71 | 1.45 | 1.55  |      |      |       |      |  |  |
| GENE2912X | 13842_at   | 13842_at   | 1         | 1.3  | 0.64  | 0.96 | 1.98 | 1.18  | 1.5  |  |  |
|           | 3.9        | 2.31 2.47  | 3.64 2.56 | 2.93 | 4.15  |      |      |       |      |  |  |
| GENE2910X | 19460_s_at | 19460_s_at | 1         | 1.44 | 0.67  | 1.01 | 1.46 | 0.75  | 0.74 |  |  |
|           | 3.19       | 2.13 2.29  | 2.97 2.02 | 2.2  | 2.77  |      |      |       |      |  |  |
| GENE2911X | 14711_at   | 14711_at   | 1         | 1.01 | 0.51  | 1.35 | 1.83 | 0.31  | 1.08 |  |  |
|           | 3.5        | 2.28 2.16  | 3.93 2.43 | 2.01 | 3.29  |      |      |       |      |  |  |
| GENE2909X | 19946_at   | 19946_at   | 1         | 1.13 | -0.25 | 1.04 | 1.16 | 0.2   | 1.32 |  |  |
|           | 2.76       | 1.42 1.69  | 2.59 1.4  | 1.86 | 3.24  |      |      |       |      |  |  |
| GENE2891X | 18631_at   | 18631_at   | 1         | 1.84 | 0.43  | 1.84 | 2.37 | 0.49  | 1.58 |  |  |
|           | 4.2        | 2.79 3.02  | 3.82 2.73 | 3.17 | 3     |      |      |       |      |  |  |
| GENE2890X | 19555_at   | 19555_at   | 1         | 1.41 | 0.67  | 2.45 | 2.62 | 0.25  | 2    |  |  |
|           | 3.43       | 2.86 3.45  | 3.03 2.51 | 3.23 | 2.82  |      |      |       |      |  |  |
| GENE2889X | 14250_r_at | 14250_r_at | 1         | 1.2  | 0.69  | 2.29 | 1.27 | 0.02  | 1.38 |  |  |
|           | 2.9        | 1.68 2.49  | 2.75 1.35 | 2.17 | 1.92  |      |      |       |      |  |  |
| GENE2888X | 14249_i_at | 14249_i_at | 1         | 0.89 | 0.41  | 1.86 | 1.23 | -0.45 | 1.02 |  |  |
|           | 2.41       | 1.55 2.11  | 2.36 1.09 | 1.71 | 1.96  |      |      |       |      |  |  |
| GENE2895X | 13834_at   | 13834_at   | 1         | 0.8  | 1.05  | 3.03 | 1    | 0.88  | 3.1  |  |  |
|           | 2.83       | 2.3 3.32   | 2.75 2.54 | 3.65 | 2.45  |      |      |       |      |  |  |
| GENE2894X | 19263_at   | 19263_at   | 1         | 0.7  | 0.77  | 2.38 | 0.58 | 0.77  | 1.79 |  |  |
|           | 2.61       | 2.02 3.27  | 2.08 1.92 | 2.75 | 2.53  |      |      |       |      |  |  |
| GENE2897X | 18217_g_at | 18217_g_at | 1         | 1.39 | 1.51  | 2.94 | 2.11 | 1.49  | 2.63 |  |  |
|           | 3.37       | 1.82 3.29  | 3.42 2    | 3.5  | 4.75  |      |      |       |      |  |  |
| GENE2896X | 18216_at   | 18216_at   | 1         | 1.27 | 1.27  | 2.99 | 1.73 | 1.49  | 2.67 |  |  |
|           | 2.82       | 1.76 3.22  | 3.07 1.88 | 3.47 | 4.77  |      |      |       |      |  |  |
| GENE2752X | 16952_s_at | 16952_s_at | 1         | 0.53 | 0.71  | 1.38 | 0.74 | 1.07  | 1.57 |  |  |
|           | 1.44       | 1.27 1.38  | 1.25 1.19 | 1.17 | 2.09  |      |      |       |      |  |  |
| GENE2152X | 13154_s_at | 13154_s_at | 1         | 1.72 | 1.33  | 2.71 | 2.9  | 2     | 3.89 |  |  |
|           | 3.32       | 2.6 4.24   | 3.4 2.98  | 3.81 | 4.17  |      |      |       |      |  |  |
| GENE2151X | 13966_at   | 13966_at   | 1         | 1.28 | 0.6   | 1.39 | 1.53 | 1.08  | 1.96 |  |  |
|           | 1.7        | 1.05 1.81  | 1.56 1.64 | 2.36 | 1.87  |      |      |       |      |  |  |
| GENE2150X | 14116_at   | 14116_at   | 1         | 1.13 | 0.6   | 1.05 | 1.34 | 0.48  | 1.2  |  |  |
|           | 1.46       | 1.05 1.41  | 1.48 1.25 | 1.61 | 1.5   |      |      |       |      |  |  |
| GENE1893X | 19951_at   | 19951_at   | 1         | 1.67 | 0.33  | 1.27 | 0.75 | 0.28  | 2.16 |  |  |
|           | 1.95       | 0.96 1.49  | 1.8 0.79  | 1.91 | 2.28  |      |      |       |      |  |  |
| GENE2933X | 13070_at   | 13070_at   | 1         | 0.94 | 0.63  | 0.62 | 0.78 | 0.92  | 1    |  |  |
|           | 0.96       | 1.6 1.27   | 0.69 1.8  | 1.65 | 2.02  |      |      |       |      |  |  |
| GENE2932X | 20551_at   | 20551_at   | 1         | 0.78 | 0.28  | 0.27 | 0.86 | 0.77  | 0.68 |  |  |
|           | 0.92       | 1.48 0.87  | 0.81 1.69 | 1.39 | 1.96  |      |      |       |      |  |  |
| GENE2819X | 17840_at   | 17840_at   | 1         | 2.48 | 2.61  | 2.24 | 3.59 | 2.64  | 2.51 |  |  |
|           | 2.05       | 4.31 3.4   | 2.71 4.69 | 3.59 | 5.1   |      |      |       |      |  |  |
| GENE2818X | 12341_s_at | 12341_s_at | 1         | 1.39 | 1.26  | 0.88 | 1.52 | 1.13  | 0.86 |  |  |
|           | 1.41       | 2.53 1.35  | 1.39 2.78 | 1.71 | 2.85  |      |      |       |      |  |  |
| GENE2815X | 16230_at   | 16230_at   | 1         | 1.07 | 1.32  | 1.01 | 0.97 | 1.45  | 1.2  |  |  |
|           | 1.16       | 1.85 1.3   | 0.86 2.05 | 1.46 | 2.52  |      |      |       |      |  |  |
| GENE2761X | 12007_at   | 12007_at   | 1         | 0.96 | 1.54  | 1.3  | 1.03 | 1.79  | 1.46 |  |  |
|           | 1.37       | 2.17 1.2   | 0.83 2.84 | 2.08 | 2.84  |      |      |       |      |  |  |
| GENE2718X | 13367_at   | 13367_at   | 1         | 0.37 | 0.85  | 0.35 | 0.7  | 0.98  | 0.96 |  |  |
|           | 0.77       | 1.74 0.67  | 0.75 1.91 | 1.09 | 2.26  |      |      |       |      |  |  |
| GENE2817X | 18597_at   | 18597_at   | 1         | 1.77 | 2.37  | 1.27 | 1.89 | 2.43  | 1.8  |  |  |
|           | 2.15       | 3.08 2.42  | 1.7 3.19  | 2.79 | 3.98  |      |      |       |      |  |  |
| GENE2816X | 13908_s_at | 13908_s_at | 1         | 1.7  | 1.94  | 1.25 | 1.32 | 2.02  | 1.7  |  |  |
|           | 1.9        | 2.57 2.15  | 1.85 2.86 | 2.43 | 3.12  |      |      |       |      |  |  |

|           |            |            |           |      |      |      |      |      |      |
|-----------|------------|------------|-----------|------|------|------|------|------|------|
| GENE2814X | 13215_at   | 13215_at   | 1         | 2.92 | 3.2  | 2.53 | 3.56 | 3.51 | 3.48 |
|           | 3.4        | 4.65 4.51  | 4.42 5.5  | 5.99 | 6.71 |      |      |      |      |
| GENE2813X | 19845_g_at | 19845_g_at | 1         | 1.01 | 1.42 | 1.19 | 1.19 | 1.63 | 1.6  |
|           | 1.44       | 2.36 1.96  | 1.95 2.79 | 2.2  | 3.43 |      |      |      |      |
| GENE2812X | 14015_s_at | 14015_s_at | 1         | 3.36 | 3.23 | 2.67 | 2.93 | 4.47 | 4.23 |
|           | 3.64       | 3.63 4.1   | 3.6 5.06  | 6.1  | 5.72 |      |      |      |      |
| GENE2811X | 19640_at   | 19640_at   | 1         | 1.98 | 2.51 | 3.19 | 2.6  | 3.61 | 4.27 |
|           | 2.86       | 4.21 4.15  | 2.96 4.94 | 4.48 | 6.15 |      |      |      |      |
| GENE2810X | 19894_at   | 19894_at   | 1         | 1.19 | 0.99 | 1.29 | 1.13 | 1.49 | 1.45 |
|           | 1.14       | 1.44 1.68  | 1.07 1.59 | 1.99 | 2.54 |      |      |      |      |
| GENE2804X | 20420_at   | 20420_at   | 1         | 1.74 | 2    | 0.26 | 1.68 | 2.58 | 3.1  |
|           | 1.61       | 2.07 2.88  | 1.4 3.23  | 3.74 | 5.17 |      |      |      |      |
| GENE2803X | 19641_at   | 19641_at   | 1         | 1.76 | 1.19 | 0.19 | 1.48 | 2.19 | 1.94 |
|           | 1.37       | 3.05 2.4   | 1.37 3.87 | 3.39 | 5.47 |      |      |      |      |
| GENE2802X | 13176_at   | 13176_at   | 1         | 0.77 | 0.45 | 0.39 | 0.69 | 1.23 | 1.43 |
|           | 0.91       | 1.45 1.15  | 1.15 1.64 | 1.82 | 2.61 |      |      |      |      |
| GENE2862X | 18604_at   | 18604_at   | 1         | 1.66 | 1.15 | 1.58 | 1.57 | 1.36 | 1.65 |
|           | 3.03       | 2.04 1.95  | 2.71 2.11 | 1.95 | 4.85 |      |      |      |      |
| GENE2861X | 19181_s_at | 19181_s_at | 1         | 1.66 | 0.79 | 1.33 | 1.72 | 1.18 | 1.44 |
|           | 2.86       | 1.95 1.74  | 2.78 1.97 | 1.77 | 5.11 |      |      |      |      |
| GENE2860X | 19182_at   | 19182_at   | 1         | 1.51 | 0.86 | 0.88 | 1.65 | 1.43 | 1.4  |
|           | 2.67       | 1.46 1.05  | 2.64 1.71 | 1.33 | 4.47 |      |      |      |      |
| GENE2859X | 20017_at   | 20017_at   | 1         | 0.62 | 0.69 | 0.94 | 1.31 | 0.62 | 1.2  |
|           | 2.01       | 1.41 0.82  | 1.5 1.24  | 0.88 | 2.27 |      |      |      |      |
| GENE2866X | 13115_at   | 13115_at   | 1         | 1.72 | 1.87 | 0.45 | 2.05 | 2.37 | 1.26 |
|           | 2.74       | 2.54 2.16  | 2.89 3.45 | 2.46 | 4.8  |      |      |      |      |
| GENE2865X | 20685_at   | 20685_at   | 1         | 1.29 | 0.78 | 0.5  | 1.43 | 1.58 | 1.13 |
|           | 1.36       | 2.04 1.32  | 1.73 2.24 | 1.57 | 3.49 |      |      |      |      |
| GENE2864X | 14614_at   | 14614_at   | 1         | 1.05 | 0.87 | 0.3  | 1.12 | 1.68 | 0.79 |
|           | 1.56       | 1.75 0.7   | 1.55 1.8  | 1    | 3.52 |      |      |      |      |
| GENE2759X | 17008_at   | 17008_at   | 1         | 0.87 | 1.74 | 1.82 | 1.31 | 2.15 | 2.1  |
|           | 1.67       | 2.55 1.82  | 1.84 2.23 | 1.96 | 4.41 |      |      |      |      |
| GENE2758X | 13189_s_at | 13189_s_at | 1         | 0.74 | 0.97 | 1.46 | 1.23 | 0.87 | 1.39 |
|           | 1.17       | 1.94 1.55  | 1.49 2.16 | 1.64 | 3.75 |      |      |      |      |
| GENE2757X | 16981_s_at | 16981_s_at | 1         | 0.8  | 0.89 | 1.4  | 1.16 | 1.06 | 1.47 |
|           | 1.26       | 1.61 1.5   | 1.54 1.91 | 1.53 | 3.18 |      |      |      |      |
| GENE2756X | 15680_s_at | 15680_s_at | 1         | 0.58 | 1.23 | 1.26 | 0.62 | 1.31 | 1.16 |
|           | 2.08       | 2.1 1.59   | 1.91 2.04 | 1.74 | 4.34 |      |      |      |      |
| GENE2755X | 15479_at   | 15479_at   | 1         | 0.63 | 0.72 | 0.85 | 0.72 | 0.59 | 0.75 |
|           | 0.93       | 1.36 1.14  | 1.03 1.38 | 1.13 | 3.06 |      |      |      |      |
| GENE2754X | 13187_i_at | 13187_i_at | 1         | 0.93 | 0.79 | 1.2  | 1.54 | 0.84 | 1.07 |
|           | 1.3        | 1.6 1.23   | 1.42 1.81 | 1.48 | 2.93 |      |      |      |      |
| GENE2753X | 13188_r_at | 13188_r_at | 1         | 0.69 | 0.78 | 0.91 | 1.23 | 0.64 | 0.75 |
|           | 0.91       | 1.55 0.67  | 1.4 1.45  | 1.08 | 2.62 |      |      |      |      |
| GENE2846X | 13549_at   | 13549_at   | 1         | 0.42 | 1.17 | 0.24 | 0.56 | 0.7  | 0.49 |
|           | 0.78       | 0.95 1.12  | 1.16 0.7  | 0.97 | 1.42 |      |      |      |      |
| GENE2155X | 14635_s_at | 14635_s_at | 1         | 3.98 | 4.73 | 3.35 | 5.58 | 3.42 | 3.33 |
|           | 1.58       | 5.27 4.48  | 4.08 6.05 | 4.94 | 4.8  |      |      |      |      |
| GENE2154X | 17280_at   | 17280_at   | 1         | 0.84 | 0.87 | 1.15 | 1.03 | 0.71 | 0.9  |
|           | 0.27       | 0.9 1.09   | 1.05 0.8  | 1.13 | 1.32 |      |      |      |      |
| GENE2948X | 19462_at   | 19462_at   | 1         | 2.35 | 0.88 | 1.29 | 2.13 | 1.48 | 1.98 |
|           | 3.59       | 2.71 2.71  | 3.51 2.97 | 3.25 | 2.6  |      |      |      |      |
| GENE2947X | 18268_s_at | 18268_s_at | 1         | 1.58 | 0.58 | 0.86 | 1.2  | 0.8  | 0.68 |
|           | 2.15       | 1.98 1.69  | 2.11 1.96 | 1.84 | 1.92 |      |      |      |      |
| GENE2145X | 20599_at   | 20599_at   | 1         | 1.07 | 0.63 | 0.73 | 1.42 | 0.67 | 0.82 |
|           | 1.58       | 1.86 1.56  | 1.58 2.07 | 1.5  | 1.19 |      |      |      |      |

|           |            |            |           |      |      |       |      |      |      |
|-----------|------------|------------|-----------|------|------|-------|------|------|------|
| GENE2144X | 16992_at   | 16992_at   | 1         | 0.71 | 0.45 | 0.65  | 0.77 | 0.33 | 0.74 |
|           | 1.04       | 1.16 0.97  | 0.82 1.16 | 1.09 | 0.81 |       |      |      |      |
| GENE2146X | 16235_at   | 16235_at   | 1         | 1.32 | 0.83 | 0.94  | 1.76 | 1.14 | 1.3  |
|           | 1.67       | 1.94 1.46  | 2.13 2.14 | 1.42 | 1.22 |       |      |      |      |
| GENE2149X | 19844_at   | 19844_at   | 1         | 1.45 | 1.56 | 1.26  | 1.65 | 1.83 | 1.14 |
|           | 1.97       | 2.36 1.84  | 2.37 2.68 | 2.32 | 2.53 |       |      |      |      |
| GENE2148X | 19376_at   | 19376_at   | 1         | 1.53 | 0.77 | 0.74  | 1.51 | 0.95 | 1.18 |
|           | 1.71       | 1.86 1.31  | 1.59 2.12 | 1.79 | 2.1  |       |      |      |      |
| GENE2147X | 14320_at   | 14320_at   | 1         | 1.6  | 1.23 | 0.73  | 1.72 | 1.21 | 1.12 |
|           | 2.2        | 1.62 1.74  | 1.84 1.96 | 2.05 | 2.4  |       |      |      |      |
| GENE2203X | 13219_at   | 13219_at   | 1         | 1.89 | 1.39 | -0.25 | 0.96 | 1.11 | 0.33 |
|           | 1.92       | 2.21 0.93  | 1.6 2.56  | 1.51 | 1.8  |       |      |      |      |
| GENE2202X | 20287_at   | 20287_at   | 1         | 1.57 | 1.26 | -0.18 | 1.16 | 1.37 | 0.83 |
|           | 1.64       | 2.01 0.96  | 1.22 2.46 | 1.63 | 2.25 |       |      |      |      |
| GENE2201X | 15463_at   | 15463_at   | 1         | 0.76 | 0.59 | 0.29  | 0.81 | 0.55 | 0.46 |
|           | 1.34       | 1.52 0.72  | 1.02 1.63 | 0.93 | 1.08 |       |      |      |      |
| GENE2200X | 18330_at   | 18330_at   | 1         | 0.77 | 0.61 | 0.27  | 0.58 | 0.65 | 0.27 |
|           | 0.85       | 1.22 0.69  | 0.62 1.41 | 1.01 | 0.83 |       |      |      |      |
| GENE2199X | 20129_at   | 20129_at   | 1         | 0.96 | 0.28 | 0.22  | 0.97 | 0.58 | 0.48 |
|           | 0.79       | 1.15 0.65  | 0.81 1.26 | 0.83 | 1    |       |      |      |      |
| GENE2196X | 13685_at   | 13685_at   | 1         | 1.46 | 1.27 | 0.23  | 2.07 | 2.08 | 1.4  |
|           | 2.23       | 2.59 1.51  | 2.47 3.94 | 3.08 | 2.58 |       |      |      |      |
| GENE2206X | 15641_s_at | 15641_s_at | 1         | 1.52 | 1.95 | 0.84  | 1.17 | 2.41 | 1    |
|           | 2.04       | 3.18 1.42  | 2.17 3.43 | 1.65 | 2.67 |       |      |      |      |
| GENE2184X | 14640_at   | 14640_at   | 1         | 1.95 | 2.26 | 0.55  | 1.39 | 2.33 | 1.08 |
|           | 2.24       | 2.36 1.17  | 1.82 2.58 | 0.66 | 2.83 |       |      |      |      |
| GENE2183X | 14686_at   | 14686_at   | 1         | 0.77 | 1.6  | 0.76  | 0.68 | 1.31 | 1    |
|           | 1.46       | 1.6 0.75   | 1.46 1.67 | 0.86 | 2.12 |       |      |      |      |
| GENE2182X | 17956_i_at | 17956_i_at | 1         | 1.15 | 1.26 | 0.58  | 0.66 | 1.89 | 0.57 |
|           | 0.53       | 1.28 0.61  | 1.02 1.75 | 1.47 | 1.44 |       |      |      |      |
| GENE2205X | 20259_at   | 20259_at   | 1         | 1.48 | 1.58 | 0.62  | 1.16 | 1.72 | 0.87 |
|           | 2.33       | 2.46 1.68  | 1.85 2.21 | 2    | 1.58 |       |      |      |      |
| GENE2204X | 19128_at   | 19128_at   | 1         | 1.07 | 0.96 | 0.39  | 0.83 | 1.07 | 0.43 |
|           | 1.08       | 1.34 0.66  | 0.73 1.12 | 0.69 | 0.8  |       |      |      |      |
| GENE2181X | 13863_at   | 13863_at   | 1         | 1.22 | 1.91 | 1.46  | 2.17 | 1.73 | 1.97 |
|           | 1.87       | 3.91 1.72  | 1.32 3.07 | 1.93 | 2.1  |       |      |      |      |
| GENE2178X | 16668_at   | 16668_at   | 1         | 1    | 1.51 | 0.8   | 1    | 2.14 | 0.95 |
|           | 1.45       | 2.61 1.67  | 0.7 1.44  | 1.39 | 1.2  |       |      |      |      |
| GENE2177X | 12004_at   | 12004_at   | 1         | 1.53 | 2.24 | 1.67  | 1.83 | 1.93 | 1    |
|           | 1.78       | 1.86 1.67  | 1.07 1.93 | 1.28 | 1.96 |       |      |      |      |
| GENE2176X | 19171_at   | 19171_at   | 1         | 1.28 | 1.69 | 1.58  | 1.4  | 1.78 | 1.6  |
|           | 1.26       | 1.57 1.46  | 1.36 1.7  | 1.72 | 1.76 |       |      |      |      |
| GENE2175X | 15181_at   | 15181_at   | 1         | 1.14 | 1.51 | 0.93  | 0.82 | 1.29 | 1.04 |
|           | 1.23       | 1.54 1.34  | 1.25 1.42 | 1.21 | 1.2  |       |      |      |      |
| GENE1921X | 14460_at   | 14460_at   | 1         | 0.51 | 0.74 | 0.73  | 0.41 | 0.85 | 0.56 |
|           | 0.86       | 1.1 0.89   | 0.9 0.94  | 0.86 | 0.87 |       |      |      |      |
| GENE1923X | 15859_at   | 15859_at   | 1         | 1.13 | 1.76 | 1.95  | 0.48 | 1.6  | 1.58 |
|           | 2.61       | 2.76 1.27  | 1.67 2.31 | 1.54 | 2.51 |       |      |      |      |
| GENE1922X | 15775_at   | 15775_at   | 1         | 1.19 | 2.24 | 2.98  | 1.49 | 2.05 | 2.12 |
|           | 2.97       | 3.13 2.61  | 2.66 2.57 | 2.09 | 2.63 |       |      |      |      |
| GENE2743X | 17548_s_at | 17548_s_at | 1         | 1.13 | 1.91 | 1.36  | 0    | 2.87 | 2.82 |
|           | 1.48       | 2.29 1.86  | 1.26 2.93 | 2.14 | 4.55 |       |      |      |      |
| GENE2742X | 16888_at   | 16888_at   | 1         | 0.73 | 1.74 | 1.22  | 0.17 | 3.17 | 2.74 |
|           | 0.62       | 2.24 1.65  | 0.94 2.68 | 1.77 | 3.72 |       |      |      |      |
| GENE2751X | 16951_i_at | 16951_i_at | 1         | 0.2  | 0.45 | 1.01  | 0.39 | 0.84 | 0.92 |
|           | 0.82       | 0.92 0.74  | 0.7 0.62  | 0.79 | 2    |       |      |      |      |

|           |            |            |           |       |      |      |      |      |      |   |
|-----------|------------|------------|-----------|-------|------|------|------|------|------|---|
| GENE2741X | 19614_at   | 19614_at   | 1         | 1.26  | 1.78 | 1.9  | 0    | 2.78 | 3.41 | 2 |
|           | 1.7        | 2.14 1.58  | 2.36 2.64 | 4.38  |      |      |      |      |      |   |
| GENE2570X | 13217_s_at | 13217_s_at | 1         | -0.04 | 1.15 | 2.25 | 0.19 | 2.24 | 3.44 |   |
|           | 1.57       | 1.67 2.27  | 2.06 2.01 | 2.58  | 4.93 |      |      |      |      |   |
| GENE2019X | 12500_s_at | 12500_s_at | 1         | 0.6   | 1.99 | 2.26 | 0.67 | 2.13 | 2.34 |   |
|           | 0.7        | 2.38 2.29  | 0.76 2.77 | 2.72  | 3.69 |      |      |      |      |   |
| GENE2018X | 16524_at   | 16524_at   | 1         | 0.28  | 1.32 | 1.68 | 0.53 | 1.68 | 1.89 |   |
|           | 0.32       | 1.72 1.61  | 0.86 1.55 | 1.39  | 2.46 |      |      |      |      |   |
| GENE2017X | 17516_at   | 17516_at   | 1         | 0.93  | 2.14 | 3.11 | 0.12 | 2.47 | 3.29 |   |
|           | 1.18       | 3 3.62     | 1.34 2.68 | 3.6   | 4.68 |      |      |      |      |   |
| GENE2016X | 18681_at   | 18681_at   | 1         | 0.44  | 0.96 | 1.46 | 0.3  | 1.05 | 1.13 |   |
|           | 0.36       | 1.34 1.32  | 0.49 0.96 | 1.35  | 2.32 |      |      |      |      |   |
| GENE2015X | 19284_at   | 19284_at   | 1         | 0.89  | 3.17 | 4.2  | 0.85 | 2.34 | 4    |   |
|           | 0.92       | 2.69 4.46  | 0.84 2.85 | 4.64  | 5.95 |      |      |      |      |   |
| GENE2014X | 17119_s_at | 17119_s_at | 1         | 0.2   | 1.21 | 1.29 | 0.26 | 0.91 | 1.39 |   |
|           | 0.38       | 0.93 1.33  | 0.35 1.09 | 1.67  | 1.63 |      |      |      |      |   |
| GENE2013X | 17522_at   | 17522_at   | 1         | 0.57  | 0.97 | 1.45 | 0.43 | 0.94 | 1.73 |   |
|           | 0.11       | 0.82 1.35  | 0.94 1.23 | 1.68  | 2.19 |      |      |      |      |   |
| GENE2012X | 15982_s_at | 15982_s_at | 1         | 0.41  | 0.99 | 0.96 | 0.66 | 0.6  | 0.72 |   |
|           | 0.22       | 0.59 0.81  | 0.42 0.41 | 0.88  | 1.36 |      |      |      |      |   |
| GENE2030X | 16298_at   | 16298_at   | 1         | 0.92  | 3.26 | 5.81 | 1.2  | 2.63 | 5.57 |   |
|           | 3.12       | 3.65 5.54  | 2.37 3.73 | 5.47  | 5.43 |      |      |      |      |   |
| GENE2029X | 19288_at   | 19288_at   | 1         | 1.25  | 3.33 | 4.96 | 1.6  | 2.99 | 5    | 1 |
|           | 3.17       | 5.22 1.39  | 2.85 5.28 | 5.43  |      |      |      |      |      |   |
| GENE2028X | 19672_at   | 19672_at   | 1         | 1.19  | 2.74 | 4.13 | 1.31 | 2.9  | 3.72 |   |
|           | 1.55       | 3.1 4.24   | 1.64 2.82 | 4.25  | 4.03 |      |      |      |      |   |
| GENE2027X | 18668_at   | 18668_at   | 1         | 1.56  | 2.63 | 3.59 | 1.36 | 1.94 | 3.12 |   |
|           | 1.75       | 1.73 3.5   | 1.43 1.73 | 3.76  | 3.52 |      |      |      |      |   |
| GENE2026X | 13244_s_at | 13244_s_at | 1         | 1.33  | 2.04 | 3.28 | 1.18 | 1.57 | 3.17 |   |
|           | 1.86       | 2.25 3.71  | 1.54 1.98 | 3.99  | 4.6  |      |      |      |      |   |
| GENE2025X | 15088_at   | 15088_at   | 1         | 0.73  | 1.08 | 2.03 | 0.94 | 0.97 | 2.06 |   |
|           | 0.8        | 1.54 2.48  | 1.34 1.17 | 2.22  | 3.17 |      |      |      |      |   |
| GENE2024X | 13243_r_at | 13243_r_at | 1         | 1.84  | 3.23 | 3.2  | 1.5  | 2.83 | 3.07 |   |
|           | 2.17       | 3.94 3.67  | 2.23 3.42 | 3.86  | 5.22 |      |      |      |      |   |
| GENE2023X | 18314_i_at | 18314_i_at | 1         | 0.83  | 1.31 | 1.6  | 0.63 | 0.86 | 1.07 |   |
|           | 0.7        | 1.65 1.42  | 0.4 1.28  | 1.33  | 1.75 |      |      |      |      |   |
| GENE2022X | 18280_at   | 18280_at   | 1         | 0.85  | 1.15 | 1.95 | 0.81 | 0.93 | 1.48 |   |
|           | 0.6        | 1.33 1.68  | 0.88 1.35 | 1.44  | 2.2  |      |      |      |      |   |
| GENE2021X | 19982_at   | 19982_at   | 1         | 0.79  | 1.77 | 1.79 | 0.77 | 1.58 | 2.06 |   |
|           | 0.49       | 2.38 2     | 0.66 1.89 | 1.63  | 2.22 |      |      |      |      |   |
| GENE2020X | 19591_at   | 19591_at   | 1         | 0.54  | 1.97 | 1.52 | 0.68 | 1.53 | 1.62 |   |
|           | 0.64       | 1.48 1.46  | 0.82 1.46 | 1.78  | 2.12 |      |      |      |      |   |
| GENE1915X | 18596_at   | 18596_at   | 1         | 0.95  | 1.48 | 1.89 | 1    | 1.72 | 2.62 |   |
|           | 1.15       | 2.33 2.44  | 0.95 1.88 | 2.32  | 1.91 |      |      |      |      |   |
| GENE1914X | 15042_at   | 15042_at   | 1         | 1.13  | 1.03 | 1.29 | 1.05 | 1.38 | 1.84 |   |
|           | 1.26       | 1.57 2.01  | 0.97 1.57 | 2.07  | 1.95 |      |      |      |      |   |
| GENE1913X | 18122_at   | 18122_at   | 1         | 1.02  | 1.49 | 2.49 | 1.13 | 1.89 | 2.3  |   |
|           | 1.48       | 2.03 2.46  | 1.6 1.63  | 2.25  | 2.24 |      |      |      |      |   |
| GENE1931X | 16063_s_at | 16063_s_at | 1         | 0.09  | 3.98 | 4.67 | 1.55 | 3.99 | 4.55 |   |
|           | 3.45       | 5 5.76     | 4.22 5.43 | 6.25  | 4.59 |      |      |      |      |   |
| GENE1930X | 13312_at   | 13312_at   | 1         | 0     | 2.06 | 3.4  | 0.26 | 2.42 | 2.92 |   |
|           | 3.8        | 4.04 4.91  | 3.65 4.12 | 5.3   | 3.58 |      |      |      |      |   |
| GENE1929X | 18166_at   | 18166_at   | 1         | 0     | 2.42 | 3.09 | 0.67 | 2.67 | 2.89 |   |
|           | 3.82       | 4.91 3.7   | 3.2 4.72  | 3.81  | 2.13 |      |      |      |      |   |
| GENE1928X | 15424_at   | 15424_at   | 1         | 0     | 2.88 | 2.92 | 1    | 3.2  | 3.23 |   |
|           | 5.09       | 4.33 3.63  | 5.24 4.4  | 3.84  | 1.67 |      |      |      |      |   |

|           |            |            |      |          |       |       |       |       |      |   |  |
|-----------|------------|------------|------|----------|-------|-------|-------|-------|------|---|--|
| GENE1920X | 19673_g_at | 19673_g_at | 1    | 1.97     | 5.29  | 7.31  | 2.09  | 5.08  | 7.08 |   |  |
|           | 2.22       | 5.32       | 7.15 | 2.61     | 5.17  | 7.02  | 3.86  |       |      |   |  |
| GENE1919X | 20214_i_at | 20214_i_at | 1    | 0.52     | 0.74  | 1.65  | 0.45  | 1.08  | 1.22 |   |  |
|           | 0.84       | 0.67       | 1.54 | 0.55     | 1.2   | 1.65  | 0.8   |       |      |   |  |
| GENE1918X | 12454_at   | 12454_at   | 1    | 0.34     | 1.1   | 2.04  | 0.38  | 0.78  | 0.77 |   |  |
|           | 0.56       | 1.17       | 1.34 | 0.78     | 0.88  | 1.39  | 1.05  |       |      |   |  |
| GENE1917X | 17179_at   | 17179_at   | 1    | 1.76     | 2.88  | 2.76  | 0.48  | 3.13  | 3.58 |   |  |
|           | 2.63       | 3.03       | 3.37 | 1.48     | 2.26  | 2.37  | 2.32  |       |      |   |  |
| GENE1916X | 13999_at   | 13999_at   | 1    | 1.49     | 2.12  | 2.52  | 1.41  | 1.9   | 2    |   |  |
|           | 1.3        | 2.48       | 2.68 | 1.17     | 2.16  | 2.12  | 1.41  |       |      |   |  |
| GENE1910X | 13933_at   | 13933_at   | 1    | 0.2      | 1.35  | 1.77  | 1     | 1.22  | 1.73 |   |  |
|           | 1.37       | 1.01       | 1.67 | 1.27     | 0.91  | 1.54  | 0.98  |       |      |   |  |
| GENE1909X | 13934_g_at | 13934_g_at | 1    | 0.49     | 1.24  | 1.52  | 0.54  | 0.87  | 1.49 |   |  |
|           | 1.59       | 0.95       | 1.36 | 1.46     | 0.8   | 1.17  | 1.14  |       |      |   |  |
| GENE1908X | 14643_s_at | 14643_s_at | 1    | 1.14     | 0.66  | 2.13  | 1.12  | 0.2   | 1.41 |   |  |
|           | 1.47       | 1.65       | 1.43 | 1.96     | 1.64  | 0.6   | 1.67  |       |      |   |  |
| GENE1907X | 20461_at   | 20461_at   | 1    | 0.94     | 0.29  | 1.83  | 1.03  | 0.1   | 1.35 |   |  |
|           | 1.4        | 1.65       | 1.93 | 1.13     | 1.55  | 1.31  | 1.36  |       |      |   |  |
| GENE1905X | 17044_at   | 17044_at   | 1    | 0.53     | 0.79  | 1.31  | 0.29  | 0.08  | 0.62 |   |  |
|           | 0.68       | 0.93       | 0.9  | 0.55     | 0.26  | 0.54  | 0.87  |       |      |   |  |
| GENE1888X | 13175_s_at | 13175_s_at | 1    | 0.84     | 0.08  | 1.05  | 0.61  | -0.14 | 0.65 |   |  |
|           | 0.8        | 0.38       | 0.86 | 0.85     | -0.13 | 0.37  | 1.16  |       |      |   |  |
| GENE1899X | 13212_s_at | 13212_s_at | 1    | 1.95     | 3.16  | 2.57  | 2.98  | 2     | 2.18 | - |  |
|           | 0.56       | 0.66       | 1.02 | 2.24     | 1.79  | 1.33  | 3.78  |       |      |   |  |
| GENE1898X | 14636_s_at | 14636_s_at | 1    | 1.61     | 1.48  | 1.75  | 2     | 0.95  | 1.3  | - |  |
|           | 0.2        | 0.88       | 0.84 | 0.95     | 0.94  | 1.21  | 2.27  |       |      |   |  |
| GENE1897X | 16129_at   | 16129_at   | 1    | 0        | 0.84  | 2.2   | 1     | 0     | 1.37 | 0 |  |
|           | 0.84       | 1.48       | 1.48 | 0        | 0     | 3.53  |       |       |      |   |  |
| GENE1896X | 20093_i_at | 20093_i_at | 1    | 0.07     | 0.36  | 1.11  | 0.51  | 0.18  | 0.84 | - |  |
|           | 0.15       | 0.08       | 0.82 | 0.67     | 0     | 0.68  | 1.17  |       |      |   |  |
| GENE2589X | 15130_s_at | 15130_s_at | 1    | 0.45     | 0.09  | 0.49  | 0.59  | -0.36 | 0.38 |   |  |
|           | 0.23       | 1.07       | 0.88 | 0.37     | 1.2   | 0.73  | 0.84  |       |      |   |  |
| GENE2588X | 18625_at   | 18625_at   | 1    | 0.54     | -0.02 | 0.9   | 0.47  | -0.79 | 0.67 |   |  |
|           | 0.31       | 1.05       | 1.13 | 0.42     | 0.89  | 0.99  | 1.47  |       |      |   |  |
| GENE2692X | 20422_g_at | 20422_g_at | 1    | 0        | 0.26  | 0.78  | 0.84  | 1.26  | 0.78 |   |  |
|           | 0.26       | 5.37       | 4.81 | 0.26     | 5.49  | 5.53  | 3.48  |       |      |   |  |
| GENE2691X | 13163_s_at | 13163_s_at | 1    | -0.19    | 0.16  | 0.52  | 0.14  | 0.07  | 0.5  |   |  |
|           | 0.33       | 1.57       | 1.44 | 0.39     | 1.55  | 1.7   | 0.8   |       |      |   |  |
| GENE2690X | 14591_at   | 14591_at   | 1    | 0.36     | 0.44  | 0.7   | 0.77  | 0.51  | 0.4  |   |  |
|           | 1.02       | 1.95       | 1.67 | 0.63     | 1.71  | 1.89  | 0.96  |       |      |   |  |
| GENE2689X | 12347_at   | 12347_at   | 1    | 0.18     | 0.39  | 0.47  | 0.09  | 0.18  | 0.14 |   |  |
|           | 0.59       | 1.84       | 1.2  | 0.36     | 1.7   | 1.66  | 0.64  |       |      |   |  |
| GENE2598X | 20421_at   | 20421_at   | 1    | 0        | -0.32 | 1.5   | 0     | 0.58  | 1.96 |   |  |
|           | 2.2        | 5.19       | 5.36 | 1        | 5.47  | 5.92  | 5     |       |      |   |  |
| GENE2597X | 16133_at   | 16133_at   | 1    | 0.25     | -0.09 | 0.24  | 0.15  | 0.03  | 0.27 |   |  |
|           | 0.46       | 1.31       | 0.98 | 0.41     | 1.18  | 1.26  | 1.42  |       |      |   |  |
| GENE2596X | 14900_at   | 14900_at   | 1    | -0.12    | -0.4  | 0.54  | -0.04 | -0.13 | 0.31 |   |  |
|           | 0.76       | 1.55       | 1.53 | 0.88     | 1.52  | 1.69  | 1.78  |       |      |   |  |
| GENE2465X | 15091_at   | 15091_at   | 1    | -0.00709 |       | -0.32 | -0.15 | 0.52  | 0.12 |   |  |
|           | 1.01       | 1.08       | 1.78 | 1.7      | 0.82  | 1.93  | 2.05  | 1.48  |      |   |  |
| GENE2595X | 15874_at   | 15874_at   | 1    | 0.16     | -1.11 | 0.8   | 1.08  | 0     | 0.32 |   |  |
|           | 0.45       | 1.88       | 2.36 | 0.58     | 1.69  | 2.52  | 1.9   |       |      |   |  |
| GENE2594X | 17034_s_at | 17034_s_at | 1    | 0.55     | -0.41 | 0.08  | 0.18  | -0.41 | 0.39 |   |  |
|           | 0.48       | 1.12       | 1.42 | 0.34     | 1.17  | 1.85  | 1.13  |       |      |   |  |
| GENE2337X | 15697_at   | 15697_at   | 1    | 0        | -0.67 | 0     | 0.73  | -0.67 | 0.48 |   |  |
|           | 0.58       | 2.7        | 3.07 | -0.26    | 2.42  | 3.23  | 1.07  |       |      |   |  |



|           |            |            |      |       |       |          |      |       |       |  |  |
|-----------|------------|------------|------|-------|-------|----------|------|-------|-------|--|--|
| GENE2590X | 13681_s_at | 13681_s_at | 1    | 0.3   | 0.35  | 0.78     | 0.25 | -0.51 | -0.45 |  |  |
|           | 0.76       | 2          | 1.73 | 0.59  | 1.38  | 1.62     | 1.88 |       |       |  |  |
| GENE2468X | 20312_s_at | 20312_s_at | 1    | 0.05  | 0.24  | 0.15     | 0.58 | 0.12  | -0.42 |  |  |
|           | 1.43       | 1.85       | 1.01 | 0.73  | 1.61  | 1.44     | 0.82 |       |       |  |  |
| GENE2062X | 15184_s_at | 15184_s_at | 1    | -0.22 | -0.19 | 0.52     | -0.3 | -0.55 | 0.15  |  |  |
|           | 1.12       | 0.91       | 1.28 | 0.58  | 0.93  | 1.62     | 0.43 |       |       |  |  |
| GENE2728X | 14786_at   | 14786_at   | 1    | 0.95  | 1.11  | -0.18    | 1.08 | 1.9   | 1.19  |  |  |
|           | 1.88       | 2.68       | 1.72 | 1.35  | 3.7   | 3.1      | 3.07 |       |       |  |  |
| GENE2727X | 13534_at   | 13534_at   | 1    | 0.28  | 0.63  | 0.2      | 0.31 | 0.66  | 0.6   |  |  |
|           | 0.74       | 1.48       | 0.92 | 0.42  | 1.93  | 1.65     | 1.27 |       |       |  |  |
| GENE2726X | 14724_f_at | 14724_f_at | 1    | 0.29  | 0.25  | -0.00621 |      | 0.3   | 0.57  |  |  |
|           | 0.37       | 0.48       | 1.05 | 0.72  | 0.42  | 1.25     | 1.11 | 0.88  |       |  |  |
| GENE2681X | 19393_at   | 19393_at   | 1    | 0.47  | 0.33  | 0.1      | 0.4  | 0.4   | 0.34  |  |  |
|           | 0.14       | 1.06       | 0.61 | 0.28  | 1.06  | 0.81     | 0.8  |       |       |  |  |
| GENE2680X | 18686_at   | 18686_at   | 1    | 0.29  | 0.24  | 0.2      | 0.22 | 0.35  | 0.34  |  |  |
|           | 0.33       | 1.14       | 0.63 | 0.48  | 1     | 1.04     | 0.74 |       |       |  |  |
| GENE2685X | 17075_s_at | 17075_s_at | 1    | 0.51  | 1.5   | 0.81     | 0.68 | 1.8   | 1.12  |  |  |
|           | 0.54       | 2.79       | 2.42 | 0.88  | 4.07  | 3.96     | 1.84 |       |       |  |  |
| GENE2684X | 18465_s_at | 18465_s_at | 1    | 0.58  | 0.87  | 0.56     | 0.28 | 0.8   | 0.77  |  |  |
|           | 0.78       | 2.36       | 1.89 | 0.42  | 2.65  | 2.21     | 1.32 |       |       |  |  |
| GENE2683X | 13825_s_at | 13825_s_at | 1    | 0.43  | 0.72  | 0.37     | 0.53 | 0.87  | 0.7   |  |  |
|           | 0.61       | 2.03       | 1.43 | 0.27  | 2.19  | 1.87     | 1.14 |       |       |  |  |
| GENE2668X | 20718_at   | 20718_at   | 1    | 0.53  | 0.9   | 0.28     | 0.27 | 0.96  | 0.5   |  |  |
|           | 0.17       | 1.09       | 0.73 | 0.37  | 1.36  | 1.13     | 1.04 |       |       |  |  |
| GENE2667X | 13106_at   | 13106_at   | 1    | 0.12  | 0.52  | 0.17     | 0.34 | 0.68  | 0.39  |  |  |
|           | 0.13       | 1.04       | 0.65 | 0.2   | 1.13  | 0.78     | 0.52 |       |       |  |  |
| GENE2772X | 18590_at   | 18590_at   | 1    | 0.07  | 1.18  | 2        | 1.12 | 2.26  | 2.92  |  |  |
|           | 0.58       | 2.91       | 3.47 | 1.09  | 3.71  | 3.54     | 3.7  |       |       |  |  |
| GENE2771X | 17111_s_at | 17111_s_at | 1    | 0.67  | 2.2   | 2.84     | 0.76 | 2.58  | 3.39  |  |  |
|           | 1.43       | 3.96       | 4.62 | 1.37  | 4.93  | 4.9      | 5.01 |       |       |  |  |
| GENE2770X | 13666_s_at | 13666_s_at | 1    | 0.46  | 1.42  | 1.64     | 0.36 | 1.57  | 1.93  |  |  |
|           | 0.88       | 2.19       | 2.41 | 0.61  | 2.52  | 3.06     | 3.04 |       |       |  |  |
| GENE2769X | 14672_at   | 14672_at   | 1    | 0.57  | 1.79  | 1.15     | 0.9  | 1.88  | 1.67  |  |  |
|           | 0.87       | 2.4        | 2.27 | 1.02  | 3.03  | 2.94     | 3.01 |       |       |  |  |
| GENE2768X | 16083_at   | 16083_at   | 1    | 0.16  | 1.2   | 0.86     | 0.35 | 1.23  | 1.45  |  |  |
|           | 0.4        | 2.03       | 1.94 | 0.27  | 2.73  | 2.84     | 2.72 |       |       |  |  |
| GENE2767X | 18653_s_at | 18653_s_at | 1    | 0.33  | 0.37  | 0.3      | 0.34 | 0.65  | 0.76  |  |  |
|           | 0.26       | 0.56       | 0.59 | 0.21  | 1.1   | 1.16     | 0.98 |       |       |  |  |
| GENE2765X | 19639_at   | 19639_at   | 1    | 0.65  | 0.9   | 0.56     | 0.38 | 1.49  | 1.02  |  |  |
|           | 0.69       | 1.88       | 1.31 | 0.69  | 2.34  | 1.66     | 1.82 |       |       |  |  |
| GENE2764X | 17431_at   | 17431_at   | 1    | 0.47  | 0.55  | 0.42     | 0.08 | 0.7   | 0.42  |  |  |
|           | 0.53       | 1.3        | 0.76 | 0.38  | 1.35  | 1.05     | 1.17 |       |       |  |  |
| GENE2762X | 18698_s_at | 18698_s_at | 1    | 0.54  | 0.92  | 0.47     | 0.35 | 0.88  | 0.92  |  |  |
|           | 0.67       | 1.52       | 1.26 | 0.24  | 1.31  | 1.44     | 1.46 |       |       |  |  |
| GENE2675X | 18966_at   | 18966_at   | 1    | 0.73  | 1.57  | 1.04     | 0.58 | 1.75  | 1.37  |  |  |
|           | 1.4        | 2.32       | 2.31 | 0.79  | 2.67  | 2.9      | 1.98 |       |       |  |  |
| GENE2676X | 18054_at   | 18054_at   | 1    | 1.5   | 2.73  | 1.58     | 1.73 | 3.03  | 2.71  |  |  |
|           | 2.84       | 4.65       | 3.34 | 1.87  | 4.92  | 3.83     | 3.37 |       |       |  |  |
| GENE2180X | 16747_at   | 16747_at   | 1    | 1.2   | 2.92  | 2.14     | 1.42 | 3.43  | 2.45  |  |  |
|           | 2.32       | 3.94       | 2.72 | 2.02  | 4.07  | 2.79     | 3.45 |       |       |  |  |
| GENE2179X | 19137_at   | 19137_at   | 1    | 0.89  | 2.07  | 1.34     | 0.84 | 2.35  | 1.57  |  |  |
|           | 1.16       | 2.99       | 2.2  | 0.84  | 2.62  | 2.33     | 2.46 |       |       |  |  |
| GENE2287X | 12217_at   | 12217_at   | 1    | 0.42  | 0.75  | 0.58     | 0.09 | 1.05  | 0.82  |  |  |
|           | 0.54       | 1.25       | 0.74 | -0.09 | 1.44  | 0.95     | 0.85 |       |       |  |  |
| GENE2674X | 17955_at   | 17955_at   | 1    | 0.59  | 0.89  | 0.75     | 0.41 | 0.99  | 0.66  |  |  |
|           | 0.67       | 1.86       | 1.48 | 0.81  | 1.59  | 1.54     | 1.3  |       |       |  |  |

|           |            |            |           |      |      |      |      |      |      |   |  |
|-----------|------------|------------|-----------|------|------|------|------|------|------|---|--|
| GENE2673X | 20715_at   | 20715_at   | 1         | 0.32 | 0.69 | 0.76 | 0.1  | 0.86 | 0.6  |   |  |
|           | 0.57       | 1.6 1.39   | 0.84 1.58 | 1.29 | 0.87 |      |      |      |      |   |  |
| GENE2664X | 17114_s_at | 17114_s_at | 1         | 0.45 | 0.55 | 0.49 | 0.44 | 0.81 | 0.46 |   |  |
|           | 0.65       | 1.6 0.8    | 0.47 1.45 | 0.96 | 0.8  |      |      |      |      |   |  |
| GENE2663X | 16955_at   | 16955_at   | 1         | 0.37 | 0.65 | 0.61 | 0.39 | 0.67 | 0.57 |   |  |
|           | 0.82       | 1.56 0.96  | 0.9 1.53  | 1.02 | 1.22 |      |      |      |      |   |  |
| GENE2662X | 20584_at   | 20584_at   | 1         | 0.25 | 0.59 | 0.31 | 0.25 | 0.57 | 0.41 |   |  |
|           | 0.61       | 1.37 0.7   | 0.83 1.32 | 0.79 | 0.68 |      |      |      |      |   |  |
| GENE2666X | 17885_at   | 17885_at   | 1         | 1.49 | 1.28 | 0.93 | 1.75 | 1.94 | 1.54 |   |  |
|           | 2.09       | 3.32 2.64  | 1.75 3.71 | 2.29 | 1.58 |      |      |      |      |   |  |
| GENE2665X | 16537_s_at | 16537_s_at | 1         | 0.46 | 0.41 | 0.72 | 0.78 | 0.73 | 0.49 |   |  |
|           | 0.46       | 1.75 1.2   | 0.92 1.81 | 1.12 | 0.7  |      |      |      |      |   |  |
| GENE2790X | 13273_at   | 13273_at   | 1         | 2.27 | 2.06 | 2.74 | 2.25 | 2.28 | 2.65 |   |  |
|           | 3.1        | 3.78 3.68  | 2.91 3.76 | 3.9  | 4.81 |      |      |      |      |   |  |
| GENE2789X | 17758_at   | 17758_at   | 1         | 1.29 | 1.2  | 2.53 | 1.7  | 1.89 | 2.78 |   |  |
|           | 2.88       | 3.6 3.3    | 2.58 3.81 | 3.84 | 4.35 |      |      |      |      |   |  |
| GENE2788X | 20262_at   | 20262_at   | 1         | 1.09 | 1.17 | 1.8  | 1.29 | 1.16 | 1.83 |   |  |
|           | 2.32       | 2.61 2.43  | 1.95 2.7  | 2.74 | 2.54 |      |      |      |      |   |  |
| GENE1924X | 15993_at   | 15993_at   | 1         | 0.44 | 0.69 | 0.67 | 0.37 | 0.43 | 0.62 |   |  |
|           | 0.83       | 1.08 0.84  | 0.68 1.52 | 1.1  | 1.06 |      |      |      |      |   |  |
| GENE2749X | 16635_s_at | 16635_s_at | 1         | 0.31 | 0.86 | 1.38 | 0.62 | 0.57 | 1.11 |   |  |
|           | 1.13       | 1.89 1.48  | 0.83 1.68 | 1.46 | 2.19 |      |      |      |      |   |  |
| GENE2750X | 13014_at   | 13014_at   | 1         | 0.99 | 1.12 | 1.97 | 1.1  | 0.9  | 1.8  | 1 |  |
|           | 2.86       | 2.74 1.16  | 2.95 2.52 | 3.02 |      |      |      |      |      |   |  |
| GENE1970X | 17781_at   | 17781_at   | 1         | 0.86 | 1.75 | 2.71 | 1.12 | 1.78 | 2.89 |   |  |
|           | 2.26       | 3.91 4.19  | 1.78 4.19 | 4.24 | 3.4  |      |      |      |      |   |  |
| GENE2672X | 12187_at   | 12187_at   | 1         | 1.28 | 2.09 | 2.3  | 0.85 | 2.17 | 1.93 |   |  |
|           | 1.19       | 3.32 2.73  | 0.93 3.34 | 3.08 | 2.35 |      |      |      |      |   |  |
| GENE2671X | 18936_at   | 18936_at   | 1         | 0.86 | 1.69 | 1.89 | 0.86 | 1.88 | 2.17 |   |  |
|           | 0.81       | 3.37 2.45  | 0.44 2.89 | 2.56 | 2.32 |      |      |      |      |   |  |
| GENE2670X | 11997_at   | 11997_at   | 1         | 0.57 | 0.93 | 1.07 | 0.64 | 0.9  | 1.28 |   |  |
|           | 0.4        | 1.56 1.58  | 0.49 1.68 | 1.61 | 1.32 |      |      |      |      |   |  |
| GENE2669X | 17905_at   | 17905_at   | 1         | 0.37 | 0.76 | 0.84 | 0.68 | 0.7  | 0.78 |   |  |
|           | 0.44       | 1.45 0.94  | 0.37 1.39 | 0.97 | 0.76 |      |      |      |      |   |  |
| GENE1927X | 14750_s_at | 14750_s_at | 1         | 2.2  | 2.84 | 3.07 | 1    | 2.26 | 2.32 |   |  |
|           | 2.96       | 4.58 3.98  | 2.2 3.8   | 3.61 | 2.96 |      |      |      |      |   |  |
| GENE1926X | 19883_at   | 19883_at   | 1         | 1.22 | 2.53 | 2.73 | 1.11 | 1.84 | 1.82 |   |  |
|           | 2.27       | 4.12 3.08  | 1.5 3.6   | 3.66 | 2.07 |      |      |      |      |   |  |
| GENE1925X | 20200_at   | 20200_at   | 1         | 0.53 | 0.71 | 1.16 | 0.72 | 0.75 | 0.97 |   |  |
|           | 0.75       | 1.8 1.21   | 1.06 1.46 | 1.06 | 1.07 |      |      |      |      |   |  |
| GENE2695X | 13584_at   | 13584_at   | 1         | 0.52 | 0.1  | 0.42 | 0.23 | 0.33 | 0.94 |   |  |
|           | 0.57       | 1.42 1.25  | 0.07 1.62 | 1.32 | 1.45 |      |      |      |      |   |  |
| GENE2694X | 14481_at   | 14481_at   | 1         | 0.48 | 0.25 | 0.31 | 0.22 | 0.13 | 0.43 |   |  |
|           | 0.3        | 1.07 0.7   | 0.13 1.1  | 0.96 | 0.83 |      |      |      |      |   |  |
| GENE2693X | 15136_s_at | 15136_s_at | 1         | 0.12 | 0.21 | 0.28 | 0.03 | 0.32 | 0.63 |   |  |
|           | 0.48       | 1.17 0.76  | 0.04 1.29 | 1    | 0.62 |      |      |      |      |   |  |
| GENE2169X | 18884_at   | 18884_at   | 1         | 1.32 | 0.09 | 0.69 | 0.28 | 0.55 | 0.79 | 1 |  |
|           | 2.07       | 1.23 0.51  | 2.09 1.25 | 0.88 |      |      |      |      |      |   |  |
| GENE2682X | 15924_at   | 15924_at   | 1         | 0.25 | 0.23 | 0.51 | 0.96 | 1    | 1    |   |  |
|           | 0.13       | 2.38 1.38  | 0.6 2.67  | 1.97 | 1.06 |      |      |      |      |   |  |
| GENE2171X | 19170_at   | 19170_at   | 1         | 0.45 | 0.01 | 0.34 | 0.3  | 0.48 | 0.73 |   |  |
|           | 0.18       | 0.93 0.45  | 0.17 1.07 | 0.83 | 0.34 |      |      |      |      |   |  |
| GENE2796X | 17653_at   | 17653_at   | 1         | 0.25 | 1.19 | 2.58 | 0.93 | 1.51 | 2.73 |   |  |
|           | 3.26       | 2.91 3.38  | 2.48 3.02 | 3.55 | 4.18 |      |      |      |      |   |  |
| GENE2795X | 14924_at   | 14924_at   | 1         | 0.41 | 0.91 | 2.5  | 0.75 | 1.53 | 2.66 |   |  |
|           | 2.16       | 2.91 3.16  | 1.89 2.91 | 3.25 | 4.51 |      |      |      |      |   |  |

|           |            |            |      |       |      |      |       |      |      |
|-----------|------------|------------|------|-------|------|------|-------|------|------|
| GENE2794X | 13246_at   | 13246_at   | 1    | -0.15 | 0.51 | 1    | 0.84  | 0.93 | 1.54 |
| 1.63      | 1.53       | 2          | 1.64 | 2.22  | 2.42 | 3.09 |       |      |      |
| GENE2793X | 12150_at   | 12150_at   | 1    | 0.64  | 0.25 | 1.54 | 1     | 1.25 | 2.71 |
| 1.7       | 1.73       | 3.17       | 1.82 | 2.48  | 4.28 | 3.83 |       |      |      |
| GENE2792X | 17775_at   | 17775_at   | 1    | 1.11  | 1.36 | 2.8  | 1.31  | 1.63 | 3.5  |
| 2.84      | 3.69       | 5.05       | 2.39 | 4.17  | 5.68 | 5.29 |       |      |      |
| GENE2791X | 20144_at   | 20144_at   | 1    | 0.53  | 0.54 | 2.38 | 0.76  | 1.32 | 2.71 |
| 1.88      | 2.57       | 3.38       | 1.72 | 2.61  | 3.71 | 3.86 |       |      |      |
| GENE2779X | 14667_at   | 14667_at   | 1    | 0.63  | 0.55 | 0.94 | 0.87  | 0.63 | 1.16 |
| 0.93      | 0.86       | 1.5        | 0.94 | 1.39  | 2.29 | 1.62 |       |      |      |
| GENE2776X | 15978_at   | 15978_at   | 1    | 1.21  | 0.63 | 1.19 | 1.79  | 1.47 | 2.53 |
| 1.75      | 2.19       | 2.54       | 1.93 | 2.89  | 3.3  | 2.32 |       |      |      |
| GENE2775X | 12112_at   | 12112_at   | 1    | 0.57  | 0.35 | 0.69 | 0.59  | 0.59 | 1.08 |
| 0.63      | 1.1        | 1.23       | 0.69 | 1.21  | 1.53 | 0.89 |       |      |      |
| GENE2782X | 18194_i_at | 18194_i_at | 1    | 1.48  | 1.84 | 2.13 | 1.13  | 2.53 | 3.53 |
| 1.58      | 3.37       | 4.68       | 2.88 | 4.39  | 5.31 | 4.23 |       |      |      |
| GENE2781X | 13100_at   | 13100_at   | 1    | 2.37  | 1.72 | 1.58 | 2.07  | 2.56 | 3.12 |
| 2.48      | 3.77       | 4.31       | 2.84 | 4.24  | 4.87 | 5.51 |       |      |      |
| GENE2780X | 12081_at   | 12081_at   | 1    | 1.02  | 0.52 | 0.73 | 1.22  | 1.31 | 1.86 |
| 1.38      | 1.92       | 2.8        | 1.58 | 2.33  | 3.14 | 2.81 |       |      |      |
| GENE2778X | 16003_s_at | 16003_s_at | 1    | 0.97  | 0.69 | 1.07 | 1.2   | 0.95 | 1.49 |
| 1.17      | 2.42       | 2.34       | 1.27 | 2.61  | 2.35 | 2.11 |       |      |      |
| GENE2777X | 15551_at   | 15551_at   | 1    | 0.98  | 0.53 | 0.91 | 1     | 0.69 | 1.56 |
| 1.25      | 1.67       | 1.93       | 1.08 | 2.22  | 2.32 | 1.96 |       |      |      |
| GENE2708X | 13645_at   | 13645_at   | 1    | 1.06  | 0.86 | 1.73 | 1.25  | 1.28 | 2.79 |
| 2.47      | 3.98       | 4.49       | 2.18 | 4.48  | 4.95 | 4.23 |       |      |      |
| GENE2707X | 18544_at   | 18544_at   | 1    | 0.88  | 0.65 | 1.48 | 1.17  | 1.33 | 2.33 |
| 2.32      | 3.2        | 3.39       | 2.07 | 3.26  | 3.64 | 3.22 |       |      |      |
| GENE2712X | 13703_at   | 13703_at   | 1    | -0.16 | 0.58 | 1.45 | 0.28  | 0.67 | 1.64 |
| 1.78      | 2.67       | 3.08       | 1.73 | 2.67  | 3.53 | 2.53 |       |      |      |
| GENE2711X | 13920_at   | 13920_at   | 1    | 0.49  | 0.7  | 1.36 | 0.78  | 0.77 | 1.79 |
| 2.21      | 3.1        | 3.21       | 1.95 | 3.41  | 3.72 | 1.62 |       |      |      |
| GENE2710X | 18267_at   | 18267_at   | 1    | 1.05  | 0.88 | 2.01 | 1.41  | 1.25 | 2.19 |
| 3.18      | 3.92       | 4.27       | 2.73 | 4.17  | 4.46 | 3.15 |       |      |      |
| GENE1999X | 20686_at   | 20686_at   | 1    | 0.65  | 0.28 | 1.62 | 0.78  | 0.73 | 2.42 |
| 1.78      | 2.16       | 3.14       | 1.39 | 2.36  | 3.51 | 1.58 |       |      |      |
| GENE1998X | 12626_at   | 12626_at   | 1    | 0.46  | 0.06 | 1.62 | 0.31  | 0.44 | 1.5  |
| 1.48      | 1.73       | 2.88       | 1.42 | 2.19  | 2.95 | 1.4  |       |      |      |
| GENE2131X | 16609_at   | 16609_at   | 1    | 0.3   | 1.51 | 1.34 | 0.66  | 1.67 | 2.22 |
| 1.37      | 1.42       | 2.73       | 1.84 | 2.49  | 3.87 | 1.43 |       |      |      |
| GENE1953X | 15211_s_at | 15211_s_at | 1    | 0.1   | 0.34 | 0.5  | -0.01 | 0.53 | 0.65 |
| 0.3       | 0.54       | 1.1        | 0.55 | 1.32  | 1.33 | 0.83 |       |      |      |
| GENE2173X | 14455_at   | 14455_at   | 1    | 1     | 1.43 | 1.48 | 0.78  | 2    | 2.2  |
| 1.58      | 2.45       | 1.76       | 1.07 | 2.76  | 2.35 | 1.19 |       |      |      |
| GENE2172X | 14057_at   | 14057_at   | 1    | 0.66  | 0.5  | 0.29 | 0.34  | 0.76 | 0.84 |
| 0.77      | 0.93       | 0.66       | 0.55 | 1.32  | 1.19 | 0.61 |       |      |      |
| GENE2134X | 12438_at   | 12438_at   | 1    | 3.17  | 1.87 | 1.67 | 2.84  | 2.8  | 3.2  |
| 3.35      | 3.68       | 4.05       | 3.03 | 4.22  | 4.59 | 2.84 |       |      |      |
| GENE2133X | 14489_at   | 14489_at   | 1    | 0.66  | 0.42 | 0.39 | 1.08  | 0.78 | 1.02 |
| 0.8       | 1.2        | 1.26       | 0.66 | 1.2   | 1.44 | 0.66 |       |      |      |
| GENE2132X | 17852_g_at | 17852_g_at | 1    | 0.76  | 0.62 | 0.23 | 0.64  | 0.54 | 0.44 |
| 0.89      | 1.13       | 1.07       | 0.41 | 1.4   | 1.42 | 0.59 |       |      |      |
| GENE2143X | 20269_at   | 20269_at   | 1    | 3.74  | 1.81 | 3.31 | 3.89  | 1.79 | 3.89 |
| 4.16      | 4.34       | 5.29       | 3.93 | 4.74  | 5.94 | 5.44 |       |      |      |
| GENE2142X | 20462_at   | 20462_at   | 1    | 2.01  | 1.17 | 1.81 | 1.67  | 0.58 | 1.63 |
| 2.66      | 2.58       | 2.96       | 2.13 | 2.44  | 2.99 | 2.72 |       |      |      |

|           |            |            |           |      |      |      |       |      |      |   |  |
|-----------|------------|------------|-----------|------|------|------|-------|------|------|---|--|
| GENE2141X | 17458_at   | 17458_at   | 1         | 1.2  | 0.54 | 1.09 | 1.25  | 0.6  | 1.19 |   |  |
|           | 1.63       | 1.75 2.04  | 1.29 1.71 | 2.13 | 1.41 |      |       |      |      |   |  |
| GENE2140X | 15151_f_at | 15151_f_at | 1         | 1.11 | 0.9  | 0.69 | 1     | 0.19 | 0.63 |   |  |
|           | 0.95       | 1.5 1.49   | 0.78 1.55 | 1.41 | 1.2  |      |       |      |      |   |  |
| GENE2139X | 18660_at   | 18660_at   | 1         | 1.52 | 1.6  | 1.83 | 1     | 0.64 | 1.44 |   |  |
|           | 1.88       | 3.28 2.8   | 1.42 2.35 | 2.27 | 1.37 |      |       |      |      |   |  |
| GENE2138X | 17391_at   | 17391_at   | 1         | 1    | 0.85 | 1.1  | 0.85  | 0.63 | 0.86 |   |  |
|           | 1.41       | 1.53 1.66  | 0.97 1.3  | 1.65 | 0.69 |      |       |      |      |   |  |
| GENE2153X | 17371_at   | 17371_at   | 1         | 1.93 | 1.92 | 3.35 | 2.7   | 0.96 | 2.98 |   |  |
|           | 2.22       | 3.8 3.87   | 2.45 3.63 | 3.51 | 3.35 |      |       |      |      |   |  |
| GENE2137X | 12314_at   | 12314_at   | 1         | 2.26 | 1.41 | 2.8  | 2.07  | 1.32 | 2.92 |   |  |
|           | 1.26       | 3.64 4.23  | 2.58 3.56 | 4.65 | 3    |      |       |      |      |   |  |
| GENE2136X | 19642_at   | 19642_at   | 1         | 0.61 | 0.53 | 0.87 | 0.55  | 0.54 | 0.83 |   |  |
|           | 0.49       | 1 1.22     | 0.46 1.04 | 1.36 | 0.48 |      |       |      |      |   |  |
| GENE2135X | 13127_s_at | 13127_s_at | 1         | 0.69 | 0.48 | 0.94 | 0.69  | 0.31 | 1.03 |   |  |
|           | 0.79       | 0.93 1.26  | 0.57 0.96 | 1.55 | 0.57 |      |       |      |      |   |  |
| GENE1912X | 12068_at   | 12068_at   | 1         | 0.94 | 1.17 | 1.26 | 0.94  | 1.21 | 1.31 |   |  |
|           | 1.42       | 1.71 1.63  | 0.77 1.68 | 2.24 | 1.31 |      |       |      |      |   |  |
| GENE1911X | 17952_at   | 17952_at   | 1         | 0.62 | 0.55 | 1.2  | 0.6   | 0.69 | 1.11 |   |  |
|           | 1.01       | 1.16 1.38  | 0.86 1.14 | 1.5  | 1.01 |      |       |      |      |   |  |
| GENE2787X | 12879_at   | 12879_at   | 1         | 0.67 | 1.07 | 1.66 | 0.96  | 0.74 | 1.25 |   |  |
|           | 2.08       | 2.82 2.57  | 1.6 2.73  | 2.6  | 3.64 |      |       |      |      |   |  |
| GENE2709X | 16638_at   | 16638_at   | 1         | 1.53 | 1.73 | 2.14 | 1.66  | 2.18 | 2.8  |   |  |
|           | 2.95       | 5.02 4.59  | 2.61 5.1  | 5.24 | 5.99 |      |       |      |      |   |  |
| GENE2706X | 17352_at   | 17352_at   | 1         | 0.57 | 0.5  | 0.88 | 0.71  | 0.49 | 0.81 |   |  |
|           | 1.45       | 2.31 2.08  | 1.1 2.08  | 1.93 | 1.97 |      |       |      |      |   |  |
| GENE2705X | 20587_at   | 20587_at   | 1         | 0.41 | 0.08 | 0.71 | 0.16  | 0.66 | 0.71 | 1 |  |
|           | 1.77       | 1.54 0.89  | 1.98 1.61 | 2.11 |      |      |       |      |      |   |  |
| GENE2704X | 18820_at   | 18820_at   | 1         | 0.05 | 0.27 | 0.8  | 0.24  | 0.75 | 0.77 |   |  |
|           | 0.93       | 1.42 1.22  | 0.79 1.59 | 1.11 | 1.32 |      |       |      |      |   |  |
| GENE2703X | 14498_at   | 14498_at   | 1         | 0.43 | 0.16 | 0.63 | 0.25  | 0.53 | 0.66 |   |  |
|           | 0.79       | 1.48 1     | 0.43 1.52 | 1.06 | 1.04 |      |       |      |      |   |  |
| GENE2700X | 12487_at   | 12487_at   | 1         | 0.26 | 1.32 | 2.49 | 0.67  | 1.32 | 1.95 | 1 |  |
|           | 3.34       | 3.3 1.37   | 4.23 3.4  | 3.65 |      |      |       |      |      |   |  |
| GENE2699X | 13205_at   | 13205_at   | 1         | 0.19 | 0.31 | 0.58 | 0.21  | 0.42 | 0.77 |   |  |
|           | 0.34       | 1.24 1.13  | 0.42 1.61 | 1.12 | 1.16 |      |       |      |      |   |  |
| GENE2698X | 19161_at   | 19161_at   | 1         | 0.28 | 0.37 | 0.97 | 0.28  | 0.48 | 0.84 |   |  |
|           | 0.38       | 1.35 1     | 0.23 1.4  | 0.97 | 1.12 |      |       |      |      |   |  |
| GENE2721X | 17376_at   | 17376_at   | 1         | 0.38 | 1.03 | 1.22 | 0.22  | 0.9  | 0.82 |   |  |
|           | 0.47       | 2.45 1.98  | 0.6 2.36  | 1.6  | 3.28 |      |       |      |      |   |  |
| GENE2697X | 19879_at   | 19879_at   | 1         | 0.5  | 0.92 | 0.79 | 0.28  | 0.71 | 0.64 |   |  |
|           | 0.66       | 2.28 1.56  | 0.57 2.22 | 1.17 | 1.8  |      |       |      |      |   |  |
| GENE2696X | 12951_at   | 12951_at   | 1         | 0.28 | 0.45 | 0.55 | 0.36  | 0.37 | 0.32 |   |  |
|           | 0.48       | 1.11 1.06  | 0.36 1.28 | 0.96 | 1.23 |      |       |      |      |   |  |
| GENE2701X | 18241_at   | 18241_at   | 1         | 0    | 1.47 | 2.02 | -0.19 | 1.15 | 1.1  |   |  |
|           | 1.32       | 3.33 2.83  | 0.8 2.8   | 2.44 | 2.61 |      |       |      |      |   |  |
| GENE2168X | 14243_at   | 14243_at   | 1         | 0.37 | 1.02 | 0.77 | 0.23  | 0.6  | 0.51 |   |  |
|           | 0.43       | 2.39 0.76  | 0.23 2.15 | 0.68 | 1.35 |      |       |      |      |   |  |
| GENE2167X | 13386_at   | 13386_at   | 1         | 0.53 | 0.5  | 0.53 | 0.67  | 0.12 | 0.39 |   |  |
|           | 0.7        | 1.67 0.74  | 0.03 1.57 | 0.6  | 0.96 |      |       |      |      |   |  |
| GENE2166X | 13128_at   | 13128_at   | 1         | 0.25 | 1.07 | 0.82 | 0.25  | 1.12 | 0.65 |   |  |
|           | 0.64       | 2.62 1.22  | 0.33 2.52 | 1.46 | 1.19 |      |       |      |      |   |  |
| GENE2165X | 20191_at   | 20191_at   | 1         | 0.18 | 0.34 | 0.23 | 0.16  | 0.22 | 0.15 |   |  |
|           | 0.11       | 1.03 0.68  | 0.14 0.96 | 0.56 | 0.41 |      |       |      |      |   |  |
| GENE2159X | 15032_at   | 15032_at   | 1         | 0.58 | 0.67 | 0.24 | 0.44  | 0.6  | 0.2  |   |  |
|           | 0.8        | 1.75 0.75  | 0.68 1.86 | 0.88 | 1.72 |      |       |      |      |   |  |

|           |            |            |      |          |       |       |       |       |          |   |  |
|-----------|------------|------------|------|----------|-------|-------|-------|-------|----------|---|--|
| GENE2157X | 15596_s_at | 15596_s_at | 1    | 0.49     | 0.4   | 0.27  | 0.57  | 0.29  | 0.17     |   |  |
|           | 0.54       | 1.24       | 0.65 | 0.59     | 1.02  | 0.5   | 1.21  |       |          |   |  |
| GENE2158X | 14058_at   | 14058_at   | 1    | 0.47     | 0.48  | 0.5   | 0.01  | 0.31  | -0.00928 |   |  |
|           | 0.6        | 1.31       | 0.44 | 0.54     | 1.05  | 0.42  | 0.87  |       |          |   |  |
| GENE2156X | 15043_at   | 15043_at   | 1    | 0.42     | 0.46  | 0.66  | 0.4   | 0.41  | 0.28     |   |  |
|           | 0.53       | 1.18       | 0.69 | 0.65     | 1.01  | 0.29  | 0.95  |       |          |   |  |
| GENE2460X | 19096_at   | 19096_at   | 1    | 0.26     | -0.41 | -0.26 | 0.48  | 0.16  | 0.58     |   |  |
|           | 2.13       | 2.67       | 1.41 | 1.67     | 3.91  | 1.66  | 1.76  |       |          |   |  |
| GENE2459X | 17702_at   | 17702_at   | 1    | 0.19     | 0.32  | 0.47  | 0.94  | 0.66  | 1.14     |   |  |
|           | 1.77       | 1.45       | 1.38 | 1.77     | 2.9   | 1.45  | 2.06  |       |          |   |  |
| GENE2458X | 18226_s_at | 18226_s_at | 1    | 0.44     | -0.12 | 0.35  | 0.66  | 0.16  | 0.3      |   |  |
|           | 0.28       | 1.29       | 1.09 | 0.95     | 1.25  | 0.65  | 0.61  |       |          |   |  |
| GENE2457X | 13135_at   | 13135_at   | 1    | 0.39     | 0.18  | 0     | 0.5   | 0.33  | 0.29     |   |  |
|           | 0.79       | 1.61       | 1.03 | 0.74     | 1.51  | 1.2   | 0.47  |       |          |   |  |
| GENE2456X | 15541_at   | 15541_at   | 1    | 0.53     | -0.02 | 0.03  | 0.57  | 0.02  | 0.29     |   |  |
|           | 0.49       | 1.13       | 0.7  | 0.71     | 0.92  | 0.91  | 0.61  |       |          |   |  |
| GENE2320X | 20098_at   | 20098_at   | 1    | -0.12    | 1.22  | 0.53  | -1.77 | 1.07  | 1.22     |   |  |
|           | 0.22       | 2.32       | 2.58 | -2.26    | 3.07  | 2.91  | 2.45  |       |          |   |  |
| GENE2319X | 13287_at   | 13287_at   | 1    | 0.04     | 0.01  | 0.11  | -0.23 | 0.18  | 0.44     |   |  |
|           | 0.26       | 0.88       | 0.57 | -0.39    | 1.22  | 1.18  | 1.13  |       |          |   |  |
| GENE2304X | 12883_at   | 12883_at   | 1    | -0.27    | 0.8   | 0.61  | -0.47 | 0.66  | 0.36     | - |  |
|           | 0.53       | 1.81       | 1.08 | -0.42    | 1.71  | 1.33  | 2.11  |       |          |   |  |
| GENE2303X | 14582_at   | 14582_at   | 1    | -0.14    | 0.84  | 0.77  | -0.33 | 0.63  | -0.00978 |   |  |
|           | -0.1       | 1.45       | 0.97 | -0.26    | 1.33  | 0.6   | 1.16  |       |          |   |  |
| GENE2649X | 14972_at   | 14972_at   | 1    | 0.09     | 0.62  | 1     | -0.09 | 1     | 1.37     | - |  |
|           | 0.09       | 1.58       | 1.18 | -0.2     | 1.85  | 1.82  | 1.61  |       |          |   |  |
| GENE2648X | 18948_s_at | 18948_s_at | 1    | 0.02     | 0.58  | 0.85  | 0.11  | 0.83  | 0.82     |   |  |
|           | 0.01       | 1.48       | 1.1  | -0.09    | 1.46  | 1.27  | 0.89  |       |          |   |  |
| GENE2647X | 19596_at   | 19596_at   | 1    | 0.09     | 0.57  | 0.57  | 0.01  | 0.56  | 0.61     | - |  |
|           | 0.14       | 1.31       | 1.26 | -0.33    | 1.31  | 1.24  | 1.08  |       |          |   |  |
| GENE2646X | 19198_at   | 19198_at   | 1    | 0.06     | 0.28  | 0.38  | 0.03  | 0.57  | 0.67     | - |  |
|           | 0.09       | 1.09       | 1.04 | -0.14    | 1.29  | 1.13  | 0.98  |       |          |   |  |
| GENE2645X | 14895_at   | 14895_at   | 1    | 0.37     | 0.46  | 0.7   | -0.07 | 0.42  | 0.72     | - |  |
|           | 0.17       | 1.2        | 1    | 0.18     | 1.15  | 1.03  | 0.93  |       |          |   |  |
| GENE2302X | 14026_at   | 14026_at   | 1    | -0.4     | 0.47  | 0.92  | -0.22 | 0.82  | 0.64     | - |  |
|           | 0.4        | 1.7        | 1.58 | -0.22    | 1.8   | 1.34  | 1.44  |       |          |   |  |
| GENE2301X | 19651_s_at | 19651_s_at | 1    | -0.25    | 0.25  | 0.43  | -0.19 | 0.47  | 0.56     | - |  |
|           | 0.45       | 1.01       | 0.84 | -0.06    | 1.28  | 0.94  | 0.85  |       |          |   |  |
| GENE2300X | 18242_g_at | 18242_g_at | 1    | -0.37    | 1     | 1.3   | -0.64 | 0.68  | 0.8      | - |  |
|           | 0.03       | 2.6        | 1.96 | -0.11    | 2.14  | 1.65  | 2.23  |       |          |   |  |
| GENE2299X | 13652_at   | 13652_at   | 1    | -0.17    | 0.23  | 0.23  | -0.06 | 0.41  | 0.38     | - |  |
|           | 0.09       | 1.02       | 0.72 | -0.1     | 0.82  | 0.45  | 0.63  |       |          |   |  |
| GENE1865X | 14673_s_at | 14673_s_at | 1    | -0.93    | 1.91  | 2.53  | -1.07 | 1.47  | 1.96     |   |  |
|           | 0.25       | 2.55       | 3.07 | -1.07    | 3.05  | 3.5   | 3.95  |       |          |   |  |
| GENE1864X | 16087_s_at | 16087_s_at | 1    | -0.00916 |       | 1.51  | 1.63  | -0.57 | 1.23     |   |  |
|           | 1.24       | 0.1        | 2.05 | 2.2      | -0.57 | 1.82  | 2.02  | 2.04  |          |   |  |
| GENE1863X | 17558_s_at | 17558_s_at | 1    | -0.24    | 0.58  | 0.77  | -0.3  | 0.58  | 0.69     |   |  |
|           | 0.15       | 1.43       | 0.92 | -0.61    | 1.03  | 1.19  | 1.3   |       |          |   |  |
| GENE1862X | 13964_at   | 13964_at   | 1    | 0        | 1.11  | 0.7   | -0.32 | 0.95  | 0.49     | - |  |
|           | 0.12       | 1.55       | 1.38 | -0.55    | 1.6   | 1.47  | 0.97  |       |          |   |  |
| GENE1861X | 15660_s_at | 15660_s_at | 1    | -0.12    | 0.7   | 0.6   | -0.27 | 0.59  | 0.41     | - |  |
|           | 0.2        | 1.02       | 0.98 | -0.49    | 0.76  | 1.18  | 0.48  |       |          |   |  |
| GENE2297X | 20354_s_at | 20354_s_at | 1    | -0.11    | -0.11 | 0.06  | -0.12 | 0.31  | 0.19     | - |  |
|           | 0.2        | 1.06       | 0.32 | -0.22    | 1.35  | 0.42  | 0.74  |       |          |   |  |
| GENE2296X | 20305_at   | 20305_at   | 1    | -0.13    | 0.02  | 0.13  | -0.4  | 0.66  | 0.51     | - |  |
|           | 0.53       | 0.96       | 0.77 | -0.45    | 1.22  | 1.05  | 0.69  |       |          |   |  |

|           |            |            |       |       |       |       |       |       |       |   |
|-----------|------------|------------|-------|-------|-------|-------|-------|-------|-------|---|
| GENE2270X | 20517_at   | 20517_at   | 1     | -0.26 | 0.73  | -0.02 | -0.26 | 0.85  | 0.24  | - |
| 0.46      | 1.79       | 0.87       | -0.18 | 1.87  | 1.07  | 0.97  |       |       |       |   |
| GENE2269X | 18610_s_at | 18610_s_at | 1     | -0.11 | 0.33  | -0.07 | -0.07 | 0.53  | 0.15  | - |
| 0.23      | 1.23       | 0.66       | -0.15 | 1.59  | 0.82  | 0.43  |       |       |       |   |
| GENE2268X | 20647_at   | 20647_at   | 1     | 0     | 0.56  | -0.18 | 0.14  | 0.51  | -0.18 | - |
| 0.45      | 1.58       | 0.54       | 0.16  | 1.46  | 1.2   | 0.75  |       |       |       |   |
| GENE2308X | 16043_at   | 16043_at   | 1     | -0.41 | 2.08  | 0.91  | -0.36 | 2.08  | 1.46  |   |
| 0.76      | 3.45       | 2.17       | -1    | 3.92  | 2.79  | 2.17  |       |       |       |   |
| GENE2307X | 15911_at   | 15911_at   | 1     | 0.17  | 1.68  | 1.15  | -0.06 | 1.91  | 0.78  |   |
| 0.33      | 2.73       | 1.71       | -0.43 | 2.91  | 1.6   | 1.48  |       |       |       |   |
| GENE2306X | 20140_at   | 20140_at   | 1     | -0.39 | 1.65  | 0.53  | -0.48 | 1.51  | 0.41  | - |
| 0.3       | 2.71       | 1.71       | -0.48 | 2.71  | 1.29  | 0.58  |       |       |       |   |
| GENE2305X | 18947_i_at | 18947_i_at | 1     | -0.01 | 0.64  | 0.45  | -0.01 | 0.83  | 0.04  | - |
| 0.23      | 1.19       | 0.41       | -0.3  | 1.05  | 0.85  | 0.42  |       |       |       |   |
| GENE2272X | 15034_at   | 15034_at   | 1     | 0.1   | 0.7   | 0.44  | -0.4  | 0.48  | 0.22  | - |
| 0.02      | 1.63       | 0.89       | -0.44 | 1.49  | 1.22  | 0.48  |       |       |       |   |
| GENE2271X | 12006_at   | 12006_at   | 1     | 0.27  | 0.76  | 0.54  | -0.3  | 0.35  | 0.05  | - |
| 0.43      | 1.51       | 1.33       | -0.02 | 1.43  | 1.34  | 0.65  |       |       |       |   |
| GENE2273X | 20669_at   | 20669_at   | 1     | 0.37  | 0.95  | 0.31  | 0.33  | 1.21  | 0.17  |   |
| 0.18      | 2.08       | 1.57       | -0.04 | 1.97  | 1.61  | 0.27  |       |       |       |   |
| GENE2274X | 16071_s_at | 16071_s_at | 1     | 0.16  | 0.38  | 0.25  | 0.3   | 0.54  | 0.46  |   |
| 0.09      | 1.64       | 1.52       | -0.06 | 2.16  | 1.55  | 0.48  |       |       |       |   |
| GENE1841X | 12702_at   | 12702_at   | 1     | -0.43 | 0.88  | 0.88  | -0.08 | 1.2   | 1.1   |   |
| 0.33      | 3.13       | 2.48       | -0.15 | 2.72  | 2.74  | 0.62  |       |       |       |   |
| GENE2343X | 13361_at   | 13361_at   | 1     | 0     | 0     | 0     | 0     | 0     | 0     | 1 |
| 3.35      | 3.37       | 0          | 4.05  | 4.4   | 0     |       |       |       |       |   |
| GENE2342X | 20104_at   | 20104_at   | 1     | 0     | -0.26 | 1     | 0     | -0.26 | 0     | 0 |
| 3.82      | 3.48       | 0.67       | 4.04  | 3.29  | 0     |       |       |       |       |   |
| GENE2341X | 17134_at   | 17134_at   | 1     | 0     | 0     | 2     | 0     | 0.84  | 0     | 0 |
| 5.39      | 5.71       | 0          | 5.4   | 6.05  | 0     |       |       |       |       |   |
| GENE2340X | 19763_at   | 19763_at   | 1     | 0     | 0     | 0.48  | 0     | 0     | 0     | 0 |
| 3.48      | 3.1        | 0          | 3.35  | 3.6   | 0     |       |       |       |       |   |
| GENE2339X | 17279_at   | 17279_at   | 1     | 0     | 0     | 1     | 0     | 0.48  | 2.26  |   |
| 0.84      | 4.49       | 4.07       | 0.84  | 4.76  | 5.14  | 0     |       |       |       |   |
| GENE2338X | 20337_at   | 20337_at   | 1     | -0.11 | -0.13 | 0.5   | -0.04 | 0.2   | 0.5   |   |
| 0.31      | 2          | 1.54       | 0.09  | 1.82  | 1.78  | -0.09 |       |       |       |   |
| GENE2336X | 13919_at   | 13919_at   | 1     | 0     | 1     | 2.88  | 0     | 0     | 0.67  | 0 |
| 5.05      | 5.37       | 0          | 3.88  | 4.87  | 1.28  |       |       |       |       |   |
| GENE2335X | 15912_at   | 15912_at   | 1     | -0.05 | 0.07  | 0.33  | 0.12  | 0.18  | 0.07  |   |
| 0.22      | 1.11       | 1.11       | -0.01 | 0.75  | 1.1   | 0.18  |       |       |       |   |
| GENE2334X | 16168_s_at | 16168_s_at | 1     | -0.06 | 0.36  | 0.58  | 0.07  | 0.01  | -0.14 |   |
| 0.12      | 1.68       | 1.53       | 0.19  | 1.09  | 0.93  | -0.4  |       |       |       |   |
| GENE1839X | 18623_at   | 18623_at   | 1     | -0.06 | 0.89  | 0.99  | -0.54 | 0.33  | 0.35  | - |
| 0.1       | 2.37       | 1.96       | -0.19 | 2.18  | 1.92  | -0.17 |       |       |       |   |
| GENE1838X | 20627_at   | 20627_at   | 1     | 0.15  | 0.5   | 0.39  | 0.03  | 0.37  | 0.34  |   |
| 0.27      | 1.01       | 0.92       | -0.03 | 1.01  | 1.03  | -0.16 |       |       |       |   |
| GENE2328X | 15517_at   | 15517_at   | 1     | 0.04  | -0.07 | 0.39  | 0.06  | 0.28  | 0.64  |   |
| 0.33      | 1.41       | 0.99       | 0.19  | 1.64  | 0.7   | -0.33 |       |       |       |   |
| GENE2327X | 15200_s_at | 15200_s_at | 1     | 0.15  | 0.01  | 0.26  | 0.24  | 0.07  | 0.34  |   |
| 0.21      | 1.05       | 0.75       | 0.46  | 1.17  | 0.85  | -0.27 |       |       |       |   |
| GENE1842X | 19489_s_at | 19489_s_at | 1     | -0.67 | 0.79  | 0.67  | 0.58  | 0.67  | 1.76  | 0 |
| 3.14      | 3.13       | 0.9        | 2.91  | 2.58  | -0.24 |       |       |       |       |   |
| GENE2473X | 15533_at   | 15533_at   | 1     | 0     | 0     | 1.58  | 0     | 1.58  | 0.67  |   |
| 2.48      | 3.43       | 2.63       | 1.67  | 3.29  | 3.26  | 0     |       |       |       |   |
| GENE2002X | 14931_at   | 14931_at   | 1     | 0.48  | 0.7   | 3.45  | 0     | 0.75  | 2.88  |   |
| 3.13      | 4.83       | 5.49       | 2.67  | 4.62  | 5.51  | 1.67  |       |       |       |   |



|           |            |            |            |       |         |       |       |       |       |   |  |
|-----------|------------|------------|------------|-------|---------|-------|-------|-------|-------|---|--|
| GENE1995X | 18659_at   | 18659_at   | 1          | 0.28  | 0.22    | 0.42  | 0.31  | 0.06  | 0.3   |   |  |
|           | 0.32       | 0.89 0.99  | 0.46 0.8   | 1.05  | 0.31    |       |       |       |       |   |  |
| GENE1994X | 13097_at   | 13097_at   | 1          | 0.26  | 0.62    | 0.56  | 0.34  | 0.32  | 0.69  |   |  |
|           | 0.14       | 1.19 1.3   | 0.2 1.3    | 1.25  | 0.33    |       |       |       |       |   |  |
| GENE1993X | 12846_s_at | 12846_s_at | 1          | 0.01  | 0.29    | 0.72  | 0.41  | 0.14  | 0.67  |   |  |
|           | 0.13       | 1.37 1.89  | 0.44 1.23  | 1.48  | 0.16    |       |       |       |       |   |  |
| GENE1992X | 15120_at   | 15120_at   | 1          | 0.48  | 0.66    | 2.88  | 0.48  | 0.22  | 2.76  |   |  |
|           | 2.07       | 4.27 5.54  | 1.26 3.93  | 5.68  | 2.48    |       |       |       |       |   |  |
| GENE1991X | 13789_at   | 13789_at   | 1          | -0.18 | 0.24    | 2.82  | 0.31  | 0.2   | 1.68  |   |  |
|           | 1.65       | 3.8 5      | 0.97 3.21  | 4.82  | 1.38    |       |       |       |       |   |  |
| GENE1990X | 15166_s_at | 15166_s_at | 1          | -0.04 | 0.18    | 0.73  | 0.05  | -0.36 | 0.5   |   |  |
|           | 0.24       | 1.04 1.1   | 0.4 0.82   | 1.06  | 0.39    |       |       |       |       |   |  |
| GENE1989X | 14017_at   | 14017_at   | 1          | 0     | 0       | 2.8   | 0     | 0     | 1.26  | 0 |  |
|           | 4.07       | 3.76 0     | 2.48 3.23  | 1.92  |         |       |       |       |       |   |  |
| GENE1988X | 13351_at   | 13351_at   | 1          | 0     | 0.48    | 1.67  | 0     | 0.84  | 1.26  | 0 |  |
|           | 2.48       | 3.48 0     | 2.13 2.32  | 0.84  |         |       |       |       |       |   |  |
| GENE1987X | 15487_at   | 15487_at   | 1          | 0.3   | 0.7     | 1.61  | 0     | 0.36  | 1.02  |   |  |
|           | 0.18       | 2 2.46     | 0.26 1.59  | 2.03  | 0.37    |       |       |       |       |   |  |
| GENE1986X | 13179_at   | 13179_at   | 1          | -0.02 | 0.9     | 1.64  | 0.07  | 0.47  | 1.03  |   |  |
|           | 0.37       | 2.16 2.36  | 0.35 1.12  | 1.51  | 0.78    |       |       |       |       |   |  |
| GENE1961X | 13279_at   | 13279_at   | 1          | -0.48 | 0.83    | 1.54  | 0.42  | 2.34  | 4.02  |   |  |
|           | 0.89       | 4.17 3.01  | 0 4.44     | 2.73  | 1.92    |       |       |       |       |   |  |
| GENE1960X | 12534_g_at | 12534_g_at | 1          | 0.02  | 0.36    | 0.5   | 0.04  | 0.21  | 1.19  |   |  |
|           | 0.09       | 1 0.93     | -0.16 0.92 | 0.8   | 0.73    |       |       |       |       |   |  |
| GENE1956X | 13274_at   | 13274_at   | 1          | 0.24  | -1      | 0.84  | -0.28 | 0.34  | 1.84  | 1 |  |
|           | 2.74       | 2.67 0.39  | 3.01 2.2   | 0.67  |         |       |       |       |       |   |  |
| GENE1955X | 17094_s_at | 17094_s_at | 1          | 0.13  | -0.28   | 0.34  | -0.32 | 0.41  | 1.05  |   |  |
|           | 0.41       | 1.4 1.25   | 0.09 1.71  | 0.94  | 0.38    |       |       |       |       |   |  |
| GENE1957X | 13284_at   | 13284_at   | 1          | 0.08  | -0.85   | 1.19  | 0.09  | 0.14  | 2.33  |   |  |
|           | 1.14       | 2.28 3     | 0.51 2.57  | 2.45  | 1.1     |       |       |       |       |   |  |
| GENE1947X | 12789_at   | 12789_at   | 1          | 0     | 0.00934 |       | 0.46  | -0.09 | 0.02  |   |  |
|           | 0.88       | 0.23 0.75  | 0.94 -0.1  | 0.9   | 1.07    | 0.36  |       |       |       |   |  |
| GENE1949X | 16027_s_at | 16027_s_at | 1          | 0.07  | 0.2     | 0.45  | 0.19  | 0.35  | 0.86  |   |  |
|           | 0.17       | 1 1.37     | 0.07 1.11  | 1.55  | 0.44    |       |       |       |       |   |  |
| GENE1948X | 14417_at   | 14417_at   | 1          | 0.16  | 0.15    | 0.39  | 0.1   | 0.21  | 0.85  |   |  |
|           | 0.2        | 0.57 1.03  | -0.01 0.77 | 1.59  | 0.32    |       |       |       |       |   |  |
| GENE1946X | 20639_at   | 20639_at   | 1          | 0.03  | -0.06   | 0.55  | -0.01 | 0.46  | 0.95  | - |  |
|           | 0.03       | 0.73 0.87  | -0.17 0.85 | 1.16  | 0.39    |       |       |       |       |   |  |
| GENE1951X | 12159_at   | 12159_at   | 1          | -0.08 | 0.09    | 0.49  | 0.18  | 0.54  | 0.39  |   |  |
|           | 0.02       | 0.64 0.94  | -0.11 1.17 | 1.26  | 0.43    |       |       |       |       |   |  |
| GENE1952X | 20151_at   | 20151_at   | 1          | -0.01 | 0.37    | 0.15  | -0.06 | 0.74  | 0.78  |   |  |
|           | 0.03       | 1.05 0.9   | -0.09 1.46 | 1.54  | 0.51    |       |       |       |       |   |  |
| GENE1840X | 20511_at   | 20511_at   | 1          | -0.17 | 0.63    | 0.51  | 0.06  | 0.79  | 1     | - |  |
|           | 0.06       | 1.43 1.55  | 0.12 1.75  | 1.69  | 0.57    |       |       |       |       |   |  |
| GENE1837X | 16358_s_at | 16358_s_at | 1          | 0.28  | 0.13    | 0.62  | 0.08  | 0.72  | 0.75  | - |  |
|           | 0.14       | 1.43 0.86  | 0.45 0.67  | 0.54  | -0.24   |       |       |       |       |   |  |
| GENE1835X | 13916_at   | 13916_at   | 1          | -0.07 | 1.76    | 2.44  | 0.09  | 2.76  | 2.23  | - |  |
|           | 0.44       | 2.07 2.77  | 1.34 3.2   | 3.17  | 0.82    |       |       |       |       |   |  |
| GENE1834X | 19503_at   | 19503_at   | 1          | 0.07  | 0.51    | 0.53  | 0.14  | 0.8   | 1.08  | 0 |  |
|           | 1.22       | 0.74 -0.07 | 1.45 1.26  | 0.43  |         |       |       |       |       |   |  |
| GENE1833X | 15867_at   | 15867_at   | 1          | 0.32  | 0.73    | 0.64  | -0.01 | 0.78  | 0.85  |   |  |
|           | 0.16       | 1.18 0.62  | -0.05 1.44 | 0.95  | 0.24    |       |       |       |       |   |  |
| GENE1832X | 13468_at   | 13468_at   | 1          | -0.4  | 0.38    | 0.71  | 0     | 0.86  | 1     |   |  |
|           | 0.41       | 1.3 0.54   | 0.38 0.96  | 1.03  | -0.21   |       |       |       |       |   |  |
| GENE2845X | 19158_at   | 19158_at   | 1          | 0.87  | 0.69    | -0.09 | 0.75  | 0.71  | -0.09 |   |  |
|           | 1.26       | 0.23 0.85  | 0.57 0.52  | 0.77  | 0.97    |       |       |       |       |   |  |



|           |            |            |           |       |       |       |      |       |       |
|-----------|------------|------------|-----------|-------|-------|-------|------|-------|-------|
| GENE2507X | 17089_s_at | 17089_s_at | 1         | 0.88  | 0.38  | -0.56 | 0.87 | 0.3   | 0.24  |
|           | 1.05       | -0.41 0.1  | 0.54 0.14 | 0.9   | 0.79  |       |      |       |       |
| GENE2538X | 16791_at   | 16791_at   | 1         | 2.62  | 0.96  | 0.11  | 2.77 | 1.03  | 1.08  |
|           | 2.32       | 1.63 0.58  | 2.9 2.22  | 1.27  | 2.58  |       |      |       |       |
| GENE2537X | 16340_at   | 16340_at   | 1         | 2.08  | 0.43  | -0.13 | 2.07 | 1.34  | 0.85  |
|           | 2.75       | 1.54 0.61  | 2.62 1.92 | 1.5   | 1.78  |       |      |       |       |
| GENE2536X | 20235_i_at | 20235_i_at | 1         | 2.23  | 0.38  | -0.08 | 2.13 | 1.64  | 0.57  |
|           | 2.88       | 1.68 0.15  | 2.45 2.27 | 0.75  | 2.51  |       |      |       |       |
| GENE2534X | 16393_s_at | 16393_s_at | 1         | 1.25  | 0.46  | -0.02 | 1.29 | 0.56  | 0.3   |
|           | 1.84       | 1.27 0.08  | 1.63 1.46 | 0.39  | 1.22  |       |      |       |       |
| GENE2535X | 13617_at   | 13617_at   | 1         | 1.79  | 0.74  | -0.16 | 1.84 | 1.22  | 0.54  |
|           | 2.71       | 1.48 0.47  | 2.61 1.43 | 0.52  | 2.45  |       |      |       |       |
| GENE2532X | 17278_at   | 17278_at   | 1         | 2.93  | 0.75  | 0.3   | 2.51 | 1.02  | 0.35  |
|           | 2.43       | 1.68 0.31  | 2.36 1.61 | 0.48  | 2.24  |       |      |       |       |
| GENE2531X | 20345_at   | 20345_at   | 1         | 2.21  | 1.05  | 0.08  | 1.81 | 1.79  | 0.73  |
|           | 2.18       | 1.39 -0.01 | 1.86 1.52 | -0.11 | 2.25  |       |      |       |       |
| GENE2530X | 20406_g_at | 20406_g_at | 1         | 0.89  | -0.09 | -0.15 | 1.14 | 0.76  | 0.92  |
|           | 1.26       | 0.68 -0.01 | 1.56 0.94 | 0.52  | 1.77  |       |      |       |       |
| GENE2529X | 20589_at   | 20589_at   | 1         | 1.16  | 0.26  | -0.61 | 0.81 | 0.26  | 0.23  |
|           | 1.06       | 0.79 0.03  | 1.38 0.7  | 0.12  | 1.45  |       |      |       |       |
| GENE2528X | 20346_at   | 20346_at   | 1         | 1.09  | 0.62  | 0.85  | 0.82 | 0.33  | 0.26  |
|           | 2.12       | 1.56 0.78  | 1.67 1.17 | 0.65  | 2.17  |       |      |       |       |
| GENE2527X | 15475_s_at | 15475_s_at | 1         | 1.01  | 0.55  | 0.58  | 0.82 | 0.3   | 0.21  |
|           | 1.39       | 0.99 0.61  | 1.36 0.38 | 0.63  | 1.37  |       |      |       |       |
| GENE2526X | 13641_at   | 13641_at   | 1         | 1.04  | 0.47  | 0.21  | 0.74 | 0.45  | 0.27  |
|           | 1.72       | 0.93 0.29  | 1.04 0.54 | -0.03 | 1.56  |       |      |       |       |
| GENE2542X | 14408_at   | 14408_at   | 1         | 1.91  | 0.53  | -0.26 | 1.62 | 0.91  | -0.53 |
|           | 2.58       | 2.37 0.3   | 2.58 2.44 | 0.62  | 3.26  |       |      |       |       |
| GENE2541X | 16972_at   | 16972_at   | 1         | 1.38  | 0.52  | -0.44 | 1.1  | 0.13  | -0.93 |
|           | 1.36       | 1.49 0.1   | 1.38 1.3  | 0.32  | 1.76  |       |      |       |       |
| GENE2540X | 16088_f_at | 16088_f_at | 1         | 0.94  | 0.46  | -0.98 | 1.1  | 0.44  | -0.23 |
|           | 1.61       | 0.96 -0.4  | 1.24 1    | 0.33  | 1.14  |       |      |       |       |
| GENE2539X | 16060_at   | 16060_at   | 1         | 0.56  | 0.24  | -0.55 | 0.39 | 0.2   | -0.44 |
|           | 1.33       | 0.55 -0.07 | 1.36 0.74 | 0.18  | 0.79  |       |      |       |       |
| GENE2521X | 13271_g_at | 13271_g_at | 1         | 0.9   | -0.29 | -0.26 | 1.13 | -0.07 | -0.14 |
|           | 2.17       | 0.88 0.47  | 2.12 1.25 | 0.3   | 1.09  |       |      |       |       |
| GENE2520X | 13270_at   | 13270_at   | 1         | 1.07  | -0.38 | -0.09 | 1.38 | -0.48 | -0.32 |
|           | 2.12       | 0.71 0.48  | 2.23 0.67 | 0.33  | 1.6   |       |      |       |       |
| GENE2522X | 14608_at   | 14608_at   | 1         | 0.84  | -0.11 | -0.44 | 1.07 | 0.01  | 0.18  |
|           | 1.95       | 0.64 0.05  | 1.78 1.11 | 0.79  | 1.47  |       |      |       |       |
| GENE2519X | 15143_s_at | 15143_s_at | 1         | 0.55  | -0.06 | -0.13 | 0.41 | -0.15 | -0.13 |
|           | 1.45       | 0.64 0.25  | 1.35 0.8  | 0.49  | 1.43  |       |      |       |       |
| GENE2533X | 16331_at   | 16331_at   | 1         | 1.84  | 0.26  | 0.03  | 1.67 | 0.71  | 0.47  |
|           | 2.45       | 0.97 0.03  | 2.17 1.35 | 0.41  | 0.96  |       |      |       |       |
| GENE2408X | 19664_at   | 19664_at   | 1         | 1.77  | 0.16  | -0.18 | 2.02 | 0.81  | 1.05  |
|           | 2.35       | 0.94 0     | 2.37 1.4  | 0.84  | 0.51  |       |      |       |       |
| GENE2406X | 12943_at   | 12943_at   | 1         | 2.77  | -0.34 | -0.52 | 2.32 | 0.88  | 0.16  |
|           | 3.5        | 1.79 -0.18 | 3.24 2.32 | 0.77  | -0.07 |       |      |       |       |
| GENE2405X | 12175_at   | 12175_at   | 1         | 0.8   | 0.12  | -0.34 | 0.78 | 0.61  | -0.1  |
|           | 0.91       | 0.4 -0.11  | 1.03 0.82 | 0.3   | 0.01  |       |      |       |       |
| GENE2410X | 13615_at   | 13615_at   | 1         | 1.07  | 0.54  | 0.16  | 0.83 | 0.77  | 0.87  |
|           | 1.07       | 0.5 0.13   | 0.83 1.01 | 0.6   | -0.21 |       |      |       |       |
| GENE2409X | 19268_at   | 19268_at   | 1         | 3.92  | 0.63  | 0     | 2.76 | 1.87  | 1.76  |
|           | 4.27       | 1.95 0.84  | 3.17 2.35 | 1.13  | 0     |       |      |       |       |
| GENE2407X | 15620_s_at | 15620_s_at | 1         | 0.93  | 0.31  | -0.25 | 0.99 | 0.56  | 0.78  |
|           | 1.4        | 0.28 0.18  | 1.18 0.83 | 0.53  | 0.1   |       |      |       |       |

|           |            |            |       |       |       |          |       |       |       |   |  |
|-----------|------------|------------|-------|-------|-------|----------|-------|-------|-------|---|--|
| GENE2404X | 20463_s_at | 20463_s_at | 1     | 1.39  | 0.4   | -0.52    | 1.44  | 0.4   | -0.09 |   |  |
|           | 1.8        | 1.4        | 0.83  | 1.5   | 1.17  | 1.06     | -0.55 |       |       |   |  |
| GENE2403X | 20331_at   | 20331_at   | 1     | 0.86  | 0.04  | -0.58    | 1.09  | 0.52  | 0.21  |   |  |
|           | 1.16       | 0.8        | 0.02  | 0.75  | 1.1   | 0.72     | -0.56 |       |       |   |  |
| GENE2358X | 20662_g_at | 20662_g_at | 1     | 1.24  | 0.41  | -0.02    | 1.39  | 0.27  | 0.25  |   |  |
|           | 0.91       | 0.07       | -0.01 | 0.81  | 0.18  | -0.04    | -0.16 |       |       |   |  |
| GENE2524X | 18600_at   | 18600_at   | 1     | 1.05  | 0.1   | -0.00998 |       | 1.17  | 0.35  | - |  |
|           | 0.00998    | 2.55       | 0.37  | -0.3  | 2.58  | 0.36     | -0.29 | 1.39  |       |   |  |
| GENE2357X | 16539_s_at | 16539_s_at | 1     | 0.75  | 0.64  | 0.44     | 1.3   | 0.31  | 0.24  |   |  |
|           | 2.75       | 0.11       | -0.06 | 2.85  | -0.12 | 0.71     | 0.49  |       |       |   |  |
| GENE2356X | 15040_g_at | 15040_g_at | 1     | 0.64  | 0.12  | 0.67     | 0.29  | 0.04  | 0.27  |   |  |
|           | 1.77       | 0.1        | -0.04 | 1.78  | -0.39 | -0.23    | 0.05  |       |       |   |  |
| GENE2381X | 20620_g_at | 20620_g_at | 1     | 1.29  | -0.77 | 0.19     | 2.06  | 1.36  | 1.28  |   |  |
|           | 3.77       | 0.58       | 1.51  | 3.85  | 1.58  | 2.28     | 0.41  |       |       |   |  |
| GENE2380X | 16536_at   | 16536_at   | 1     | 1.63  | -1.1  | -1.37    | 3.05  | 0.55  | 0.1   |   |  |
|           | 4.31       | -0.38      | 1.25  | 4.93  | 1.11  | 2.13     | 1.84  |       |       |   |  |
| GENE2379X | 14529_at   | 14529_at   | 1     | 0.61  | -0.55 | -0.66    | 1.3   | -0.1  | 0.04  |   |  |
|           | 1.9        | 0          | 0.39  | 1.67  | 0.23  | 0.19     | 0     |       |       |   |  |
| GENE2378X | 20619_at   | 20619_at   | 1     | 0.97  | -1.42 | -0.3     | 1.44  | -0.08 | 0.34  |   |  |
|           | 2.99       | -0.48      | 0     | 3.26  | 0.33  | 0.87     | -0.04 |       |       |   |  |
| GENE2377X | 20335_s_at | 20335_s_at | 1     | 0.25  | -1.05 | -0.25    | 1.21  | -0.18 | 0.35  |   |  |
|           | 2.73       | -0.64      | 0.71  | 2.47  | -0.05 | 0.44     | -0.48 |       |       |   |  |
| GENE2374X | 12335_at   | 12335_at   | 1     | 0.47  | 0.37  | -0.32    | 0.55  | 0.21  | -0.46 |   |  |
|           | 1.43       | 0.86       | -0.15 | 1.19  | 0.62  | -0.07    | -1.37 |       |       |   |  |
| GENE2373X | 17627_at   | 17627_at   | 1     | 0.26  | -0.63 | -0.42    | 0.16  | -0.04 | -0.04 |   |  |
|           | 1.06       | 0.64       | 0.39  | 0.76  | 0.49  | -0.02    | -0.27 |       |       |   |  |
| GENE2372X | 17302_at   | 17302_at   | 1     | 0.77  | -0.78 | -0.64    | 0.77  | -0.54 | -0.51 |   |  |
|           | 0.62       | 0.36       | -0.05 | 1.11  | 0.36  | 0.18     | -0.23 |       |       |   |  |
| GENE2371X | 17933_at   | 17933_at   | 1     | 0.36  | -0.28 | -0.78    | 0.47  | 0.14  | -0.74 |   |  |
|           | 0.28       | 0.35       | 0.02  | 1.17  | 0.32  | 0.65     | -0.37 |       |       |   |  |
| GENE2487X | 16061_s_at | 16061_s_at | 1     | 0.27  | -0.35 | -0.73    | 0.23  | -0.15 | -0.63 |   |  |
|           | 1.02       | 0.66       | -0.71 | 0.95  | 1     | -0.63    | 0.85  |       |       |   |  |
| GENE2486X | 12490_at   | 12490_at   | 1     | 0.41  | -0.19 | -0.09    | 0.38  | 0.06  | -0.11 |   |  |
|           | 1.17       | 1.03       | 0.3   | 0.81  | 0.96  | -0.54    | 1.38  |       |       |   |  |
| GENE2386X | 12278_at   | 12278_at   | 1     | 2     | 0.54  | -2.28    | 2.52  | 2.26  | 0.54  |   |  |
|           | 2.92       | 2.18       | 0     | 3.04  | 3.36  | 1.72     | 3.98  |       |       |   |  |
| GENE2385X | 12315_at   | 12315_at   | 1     | 0.45  | 0.07  | -0.53    | 0.45  | 0.7   | 0.07  |   |  |
|           | 1.07       | 0.73       | -0.11 | 1.34  | 1.34  | 0.26     | 0.67  |       |       |   |  |
| GENE2384X | 17841_at   | 17841_at   | 1     | 0.09  | -0.08 | -0.57    | 0.27  | 0.53  | -0.03 |   |  |
|           | 0.45       | 0.77       | -0.22 | 0.52  | 1.08  | 0.07     | 0.63  |       |       |   |  |
| GENE2383X | 17148_at   | 17148_at   | 1     | 0.48  | 0.43  | -0.64    | 0.98  | 1.06  | 0.02  |   |  |
|           | 0.53       | 1          | -0.38 | 0.32  | 1.52  | -0.58    | 0.68  |       |       |   |  |
| GENE2382X | 19450_at   | 19450_at   | 1     | 0.68  | 0.61  | -0.25    | 0.56  | 0.94  | 0.07  |   |  |
|           | 0.69       | 0.81       | -0.93 | 0.52  | 1.01  | -0.31    | 0.92  |       |       |   |  |
| GENE2388X | 12627_at   | 12627_at   | 1     | 0.48  | 0.14  | -0.63    | 0.26  | 0.66  | -0.59 |   |  |
|           | 0.54       | 1.05       | 0.02  | 0.84  | 1.19  | 0.11     | 0.09  |       |       |   |  |
| GENE2387X | 12421_at   | 12421_at   | 1     | 0.84  | 0.54  | -0.61    | 0.21  | 0.8   | -0.97 |   |  |
|           | 0.76       | 1.12       | -0.17 | 0.32  | 1.03  | 0.41     | 0.77  |       |       |   |  |
| GENE2390X | 16257_at   | 16257_at   | 1     | 0.42  | 0.36  | -0.4     | 0.5   | 0.29  | -0.18 |   |  |
|           | 0.57       | 0.93       | 0.06  | -0.18 | 1.19  | 0.13     | 0.1   |       |       |   |  |
| GENE2393X | 16900_at   | 16900_at   | 1     | 0.38  | 1.49  | -0.11    | 0.95  | 1.14  | -0.88 |   |  |
|           | 0.9        | 1.65       | 0.49  | 0.59  | 1.6   | 0.48     | -0.08 |       |       |   |  |
| GENE2228X | 15915_at   | 15915_at   | 1     | 0.91  | 0.87  | 0.34     | 0.15  | 0.8   | -0.57 | 1 |  |
|           | 2.19       | 0.2        | 0.15  | 1.22  | -0.14 | 0.05     |       |       |       |   |  |
| GENE2354X | 18751_f_at | 18751_f_at | 1     | 3.14  | 2.32  | -1.78    | 2.58  | 2.48  | -0.49 |   |  |
|           | 3.62       | 1.67       | -1.54 | 3.11  | 2     | -0.92    | 0.28  |       |       |   |  |

|           |            |            |      |      |       |       |      |      |       |
|-----------|------------|------------|------|------|-------|-------|------|------|-------|
| GENE2353X | 17031_s_at | 17031_s_at | 1    | 1.9  | 1.67  | -1.11 | 1.12 | 1.58 | -0.7  |
|           | 2.02       | 1.37 -1.37 | 1.7  | 1.37 | -1.37 | 0     |      |      |       |
| GENE2352X | 12504_at   | 12504_at   | 1    | 0.76 | 0.56  | -0.4  | 1.05 | 0.65 | -0.2  |
|           | 0.93       | 0.63 -0.26 | 0.84 | 0.66 | -0.13 | -0.34 |      |      |       |
| GENE2351X | 15013_at   | 15013_at   | 1    | 1.18 | 0.61  | -0.22 | 0.52 | 0.79 | -0.65 |
|           | 0.74       | 1.14 -0.35 | 0.64 | 0.21 | -0.65 | -0.38 |      |      |       |
| GENE2215X | 16615_s_at | 16615_s_at | 1    | 1.96 | 4.18  | -0.8  | 1.66 | 2.76 | 0     |
|           | 1.89       | 2.13 -0.1  | 2.37 | 1    | 0.19  | 0     |      |      |       |
| GENE2214X | 14603_at   | 14603_at   | 1    | 1.41 | 1.32  | 0.37  | 1.08 | 0.92 | 0.08  |
|           | 1.12       | 1.35 0.04  | 0.84 | 0.95 | -0.41 | -0.57 |      |      |       |
| GENE2213X | 14518_at   | 14518_at   | 1    | 0.67 | 1.06  | 0.09  | 0.64 | 1.13 | 0.01  |
|           | 0.55       | 1 -0.36    | 0.81 | 0.75 | -0.2  | -0.16 |      |      |       |
| GENE2513X | 17413_s_at | 17413_s_at | 1    | 2.18 | 1.61  | 0.66  | 1.99 | 1.78 | 1.53  |
|           | 2.16       | 1.21 0.61  | 2.2  | 1.5  | 0.9   | 2.45  |      |      |       |
| GENE2512X | 17464_at   | 17464_at   | 1    | 0.96 | 0.79  | 0.48  | 1.16 | 1.01 | 0.99  |
|           | 1.37       | 0.75 0.35  | 1.37 | 1.02 | 0.67  | 2.03  |      |      |       |
| GENE2511X | 19892_at   | 19892_at   | 1    | 1.07 | 0.82  | -0.13 | 1.1  | 1.38 | 1.14  |
|           | 1.24       | 0.86 0.15  | 0.94 | 1.23 | 0.76  | 1.92  |      |      |       |
| GENE2510X | 16989_at   | 16989_at   | 1    | 0.53 | 1.22  | 0.18  | 0.8  | 0.96 | 0.86  |
|           | 1.13       | 0.41 0.35  | 0.95 | 0.81 | 0.75  | 1.9   |      |      |       |
| GENE2509X | 18928_at   | 18928_at   | 1    | 1.48 | 1.24  | 1.04  | 1.44 | 1.39 | 1.4   |
|           | 1.65       | 1.01 0.3   | 1.35 | 1.01 | -0.02 | 1.79  |      |      |       |
| GENE2508X | 20698_at   | 20698_at   | 1    | 2.15 | 1.13  | 0     | 1.47 | 2.37 | 1.26  |
|           | 1.76       | 0 0.48     | 1.68 | 0.48 | 1.26  | 1.37  |      |      |       |
| GENE2411X | 12630_at   | 12630_at   | 1    | 3.09 | 0.5   | 0.27  | 2.14 | 2.35 | 3.55  |
|           | 3.4        | 0.77 0.21  | 2.8  | 2.08 | 2.39  | 1.44  |      |      |       |
| GENE2878X | 12712_f_at | 12712_f_at | 1    | 2    | 1.03  | 0.96  | 2.77 | 1.58 | 1.92  |
|           | 4.55       | 1.74 1.79  | 4.95 | 2.4  | 2.29  | 3.43  |      |      |       |
| GENE2877X | 17381_at   | 17381_at   | 1    | 0.45 | -0.16 | 0.02  | 1.1  | 0.35 | 0.54  |
|           | 1.75       | 0.44 0.5   | 1.94 | 0.89 | 0.78  | 1.27  |      |      |       |
| GENE2876X | 12094_at   | 12094_at   | 1    | 1.58 | -0.36 | 1.53  | 2.88 | 0.6  | 2.45  |
|           | 5.08       | 0.28 2.07  | 5.18 | 1.26 | 2.6   | 3.03  |      |      |       |
| GENE2887X | 16398_s_at | 16398_s_at | 1    | 2.72 | 0.78  | 0.36  | 3.26 | 2.2  | 2.11  |
|           | 4.59       | 2.53 2.01  | 4.65 | 3.34 | 2.91  | 3     |      |      |       |
| GENE2886X | 17341_at   | 17341_at   | 1    | 2.8  | 1.33  | 1.13  | 3.23 | 1.81 | 1.93  |
|           | 4.49       | 3.14 1.93  | 4.3  | 3.28 | 2.7   | 2.42  |      |      |       |
| GENE2885X | 12480_s_at | 12480_s_at | 1    | 1.56 | 0.85  | 0.16  | 1.36 | 1.06 | 1.01  |
|           | 2.09       | 1.29 1.13  | 1.94 | 1.47 | 1.13  | 1.22  |      |      |       |
| GENE2884X | 13078_at   | 13078_at   | 1    | 0.79 | 0.19  | -0.1  | 0.68 | 0.58 | 0.71  |
|           | 1.07       | 0.59 0.39  | 1.03 | 0.67 | 0.86  | 0.51  |      |      |       |
| GENE2883X | 17338_at   | 17338_at   | 1    | 2.48 | 0     | 0.19  | 2.17 | 1.19 | 1.1   |
|           | 3.67       | 1.89 1.71  | 2.53 | 1.44 | 2.19  | 2.07  |      |      |       |
| GENE2882X | 20167_i_at | 20167_i_at | 1    | 1.76 | 0.74  | 0.65  | 1.58 | 1.27 | 1.3   |
|           | 2.19       | 1.18 1.38  | 1.79 | 1.6  | 1.45  | 0.86  |      |      |       |
| GENE2881X | 15195_s_at | 15195_s_at | 1    | 1.43 | 0.39  | 0.39  | 1.37 | 0.38 | 1.18  |
|           | 1.84       | 0.92 1.46  | 1.76 | 1.09 | 1.45  | 0.67  |      |      |       |
| GENE2880X | 20285_s_at | 20285_s_at | 1    | 1.21 | 0.32  | 0     | 1.09 | 0.65 | 0.33  |
|           | 1.88       | 0.89 0.86  | 1.76 | 1.2  | 1.26  | 1.76  |      |      |       |
| GENE2879X | 13157_at   | 13157_at   | 1    | 1.02 | 0.27  | -0.04 | 0.77 | 0.18 | 0.18  |
|           | 1.3        | 0.32 0.62  | 1.27 | 0.77 | 0.67  | 0.87  |      |      |       |
| GENE2413X | 12695_at   | 12695_at   | 1    | 0.8  | 0.23  | 0.08  | 1.58 | 0.49 | 0.45  |
|           | 2.64       | 1.64 0.8   | 2.52 | 1.43 | 1.61  | 0.3   |      |      |       |
| GENE2091X | 19426_s_at | 19426_s_at | 1    | 0.57 | 0.07  | 0.39  | 0.5  | 0.1  | 0.72  |
|           | 1.72       | 1.02 0.75  | 1.11 | 1.02 | 0.85  | 0.34  |      |      |       |
| GENE2090X | 20653_s_at | 20653_s_at | 1    | 0.6  | 0.16  | 0.58  | 1.01 | 0.37 | 0.77  |
|           | 2.36       | 1.2 0.62   | 1.79 | 1.06 | 0.57  | 0.83  |      |      |       |

|           |            |            |           |       |       |       |      |       |      |
|-----------|------------|------------|-----------|-------|-------|-------|------|-------|------|
| GENE2116X | 12128_at   | 12128_at   | 1         | 4.47  | 2.92  | 1.37  | 3.43 | 2.48  | 0.67 |
|           | 5.38       | 5 2.32     | 5 4.7     | 2.32  | 1     |       |      |       |      |
| GENE2115X | 12305_i_at | 12305_i_at | 1         | 2.48  | 0.66  | 0.65  | 1.88 | 0.89  | 0.41 |
|           | 2.23       | 2.23 1.23  | 2.05 1.74 | 1.17  | 0.97  |       |      |       |      |
| GENE2114X | 13963_at   | 13963_at   | 1         | 2.53  | 1.11  | 0.26  | 2.76 | 1.17  | 0.81 |
|           | 3.17       | 1.97 1.08  | 2.88 2.11 | 1.26  | 0.72  |       |      |       |      |
| GENE2113X | 15415_at   | 15415_at   | 1         | 2.13  | 1.66  | 1.12  | 1.88 | 0.73  | 1.06 |
|           | 2.63       | 1.9 0.93   | 1.88 2.41 | 1.39  | 0.19  |       |      |       |      |
| GENE2112X | 18378_at   | 18378_at   | 1         | 1.22  | 0.85  | 0.63  | 1.73 | 1.2   | 1.1  |
|           | 2.22       | 2.12 1.4   | 2.32 1.78 | 1.26  | 0     |       |      |       |      |
| GENE2111X | 16412_s_at | 16412_s_at | 1         | 1.45  | 0.68  | 0.18  | 1.18 | 1.03  | 1.21 |
|           | 1.87       | 1.51 0.72  | 1.59 2.07 | 1.39  | 0.46  |       |      |       |      |
| GENE2110X | 13559_at   | 13559_at   | 1         | 0.75  | 0.36  | 0.16  | 0.8  | 0.48  | 0.74 |
|           | 1.44       | 0.85 0.78  | 1.05 1.22 | 0.72  | 0.19  |       |      |       |      |
| GENE2109X | 12115_at   | 12115_at   | 1         | 2.31  | 2.43  | 0.74  | 1.97 | 2.2   | 0.95 |
|           | 2.46       | 2.16 1.1   | 2.58 1.65 | 1.43  | 0.73  |       |      |       |      |
| GENE2108X | 12737_f_at | 12737_f_at | 1         | 2.12  | 1.75  | 1.26  | 2    | 1.85  | 1.87 |
|           | 3.5        | 1.49 1.79  | 3.62 1.64 | 1.92  | 0.84  |       |      |       |      |
| GENE2107X | 16064_s_at | 16064_s_at | 1         | 0.96  | 0.95  | 0.46  | 0.98 | 0.68  | 0.61 |
|           | 1.42       | 0.76 0.44  | 1.27 0.54 | 1.35  | 0.16  |       |      |       |      |
| GENE2104X | 20034_i_at | 20034_i_at | 1         | 4.36  | 3.56  | 3.58  | 4.49 | 3.45  | 3.45 |
|           | 4.68       | 3.07 3.48  | 4.35 2.67 | 4.1   | 0.58  |       |      |       |      |
| GENE2105X | 13942_at   | 13942_at   | 1         | 0.73  | 1.02  | 1.17  | 0.87 | 1.08  | 1.82 |
|           | 1.67       | 0.93 0.98  | 1.74 0.9  | 1.32  | 1.09  |       |      |       |      |
| GENE2106X | 12349_s_at | 12349_s_at | 1         | 1.7   | 0.98  | 1.37  | 1.54 | 1.23  | 1.83 |
|           | 2.25       | 1.05 1.16  | 1.99 1.44 | 1.42  | 1.64  |       |      |       |      |
| GENE2103X | 13631_at   | 13631_at   | 1         | 1.5   | 1.4   | 1.29  | 1.56 | 1.54  | 1.78 |
|           | 1.98       | 1.08 0.95  | 1.4 1     | 1.32  | 0.94  |       |      |       |      |
| GENE2102X | 16150_at   | 16150_at   | 1         | 1.96  | 1.37  | 1.37  | 1.83 | 1.04  | 1.53 |
|           | 2.01       | 1.33 1.14  | 1.77 0.9  | 1.06  | 1.25  |       |      |       |      |
| GENE2101X | 14691_at   | 14691_at   | 1         | 1.23  | 0.75  | 1.14  | 1.1  | 0.78  | 0.83 |
|           | 1.01       | 0.74 0.73  | 0.81 0.34 | 0.8   | 0.82  |       |      |       |      |
| GENE2100X | 20014_at   | 20014_at   | 1         | 1.02  | 0.17  | 0.3   | 1.28 | 0.26  | 0.6  |
|           | 0.97       | 0.62 0.7   | 1.25 0.88 | 1.05  | 0.66  |       |      |       |      |
| GENE2099X | 17926_s_at | 17926_s_at | 1         | 0.46  | 0.1   | 0.29  | 0.61 | 0.04  | 0.52 |
|           | 0.64       | 0.45 0.48  | 1.02 0.52 | 0.7   | 0.54  |       |      |       |      |
| GENE2098X | 20361_s_at | 20361_s_at | 1         | 1     | 0.22  | 0.64  | 1.03 | -0.09 | 0.81 |
|           | 0.88       | 0.55 0.84  | 1 0.62    | 0.93  | 0.45  |       |      |       |      |
| GENE2370X | 19840_s_at | 19840_s_at | 1         | 1.9   | 1.94  | -0.27 | 1.42 | 2.56  | 1.1  |
|           | 1.89       | 1.43 0.02  | 2.21 1.85 | 0.24  | 0     |       |      |       |      |
| GENE2369X | 16818_at   | 16818_at   | 1         | 1.59  | 1.49  | -0.1  | 0.93 | 1.6   | 0.86 |
|           | 1.76       | 0.62 -0.71 | 1.75 0.62 | -0.22 | -0.58 |       |      |       |      |
| GENE2368X | 12412_at   | 12412_at   | 1         | 0.79  | 0.32  | -0.31 | 0.9  | 0.69  | 0.73 |
|           | 1.12       | 0.37 -0.44 | 0.91 0.82 | -0.05 | -0.02 |       |      |       |      |
| GENE2367X | 12566_at   | 12566_at   | 1         | 2.1   | 1.93  | 2.3   | 2.03 | 2.48  | 2.76 |
|           | 2.37       | 1.32 0.48  | 1.63 1.07 | -0.58 | 0     |       |      |       |      |
| GENE2366X | 17317_at   | 17317_at   | 1         | 3.33  | 1.45  | 0.63  | 2.84 | 3.12  | 3.22 |
|           | 2.89       | 0.16 -0.36 | 1.49 1.32 | 0.28  | 1.7   |       |      |       |      |
| GENE2365X | 19926_at   | 19926_at   | 1         | 2     | 0.9   | 0.8   | 1.13 | 2.91  | 3.12 |
|           | 1.96       | 0.08 0.32  | 1.38 0.16 | 0.16  | 0.24  |       |      |       |      |
| GENE2901X | 16059_at   | 16059_at   | 1         | 1.15  | 1.49  | 0.98  | 0.96 | 1.07  | 0.53 |
|           | 2.81       | 2.42 1.97  | 2.6 2.2   | 2     | 2.45  |       |      |       |      |
| GENE2900X | 12051_at   | 12051_at   | 1         | 0.73  | 0.66  | 0.57  | 0.9  | 1.03  | 0.51 |
|           | 2.25       | 1.91 1.26  | 2.32 2.22 | 1.12  | 1.94  |       |      |       |      |
| GENE2097X | 12317_at   | 12317_at   | 1         | 0.78  | 0.95  | 0.75  | 0.07 | 1.22  | 0.85 |
|           | 1.47       | 1.46 0.49  | 1.53 1.56 | 0.85  | 1.1   |       |      |       |      |

|           |            |            |           |       |       |       |       |      |       |  |  |
|-----------|------------|------------|-----------|-------|-------|-------|-------|------|-------|--|--|
| GENE2096X | 19464_at   | 19464_at   | 1         | 0.92  | 0.84  | 1.01  | 0.75  | 1.2  | 0.88  |  |  |
|           | 1.67       | 1.08 0.47  | 1.67 1.18 | 0.58  | 1.43  |       |       |      |       |  |  |
| GENE2095X | 17300_at   | 17300_at   | 1         | 0.39  | 0.55  | 0.47  | 0.42  | 0.68 | 0.15  |  |  |
|           | 1.24       | 0.8 0.33   | 1.18 0.76 | 0.51  | 1.01  |       |       |      |       |  |  |
| GENE2225X | 15768_at   | 15768_at   | 1         | 1.92  | 1.68  | 0.8   | 0.26  | 1.63 | 1     |  |  |
|           | 4.05       | 3.15 1.45  | 3.1 2.87  | 0.9   | 0.48  |       |       |      |       |  |  |
| GENE2220X | 15171_s_at | 15171_s_at | 1         | 0.84  | 1.23  | 1.1   | 0.73  | 0.41 | -0.05 |  |  |
|           | 0.89       | 1.56 0.78  | 0.73 1.12 | 0.09  | 0.84  |       |       |      |       |  |  |
| GENE2446X | 17818_at   | 17818_at   | 1         | 0.51  | 0.32  | 0.4   | 0.69  | 0.26 | 0.23  |  |  |
|           | 0.69       | 1.2 0.73   | 0.69 0.86 | 0.58  | 0.25  |       |       |      |       |  |  |
| GENE1906X | 13408_s_at | 13408_s_at | 1         | 1.23  | 0.74  | 1.12  | 0.97  | 0.72 | 0.67  |  |  |
|           | 1.5        | 2.1 1.72   | 1.7 0.93  | 0.94  | 0.74  |       |       |      |       |  |  |
| GENE2219X | 18894_at   | 18894_at   | 1         | 0.29  | 1.23  | 1.3   | 0.44  | 0.98 | 0.35  |  |  |
|           | 1.17       | 0.99 -0.15 | 0.85 1    | -0.13 | 1.27  |       |       |      |       |  |  |
| GENE2218X | 14544_at   | 14544_at   | 1         | 0.09  | 1     | 0.28  | 0.13  | 0.68 | -0.08 |  |  |
|           | 1.15       | 1 -0.02    | 1.02 0.97 | 0     | 0.78  |       |       |      |       |  |  |
| GENE2221X | 14592_at   | 14592_at   | 1         | 0.81  | 1     | 0.35  | 0.36  | 0.83 | 0.08  |  |  |
|           | 0.84       | 1.27 0.16  | 0.48 1.03 | -0.19 | 1.16  |       |       |      |       |  |  |
| GENE2216X | 16786_at   | 16786_at   | 1         | 0.71  | 1.03  | 0.41  | 0.33  | 0.86 | -0.1  |  |  |
|           | 0.53       | 0.84 -0.1  | 0.61 0.82 | -0.05 | 0.43  |       |       |      |       |  |  |
| GENE2224X | 19176_at   | 19176_at   | 1         | 0.11  | 0.38  | 0.3   | 0.14  | 0.09 | -0.45 |  |  |
|           | 1.39       | 1.04 0.43  | 1.19 0.67 | 0.04  | 0.17  |       |       |      |       |  |  |
| GENE2223X | 18445_at   | 18445_at   | 1         | 0.12  | 0.32  | 0.18  | -0.25 | 0.71 | 0.05  |  |  |
|           | 1.29       | 1.02 0.23  | 1.13 0.7  | -0.52 | 0.42  |       |       |      |       |  |  |
| GENE2222X | 20199_at   | 20199_at   | 1         | 0.26  | 0.78  | 0.59  | 0.07  | 0.54 | -0.06 |  |  |
|           | 1.27       | 0.38 0.47  | 1.42 0.47 | -0.36 | -0.5  |       |       |      |       |  |  |
| GENE2089X | 13297_at   | 13297_at   | 1         | 0.36  | 1.08  | 0.77  | 0.55  | 0.98 | -0.05 |  |  |
|           | 0.31       | 1.79 0.93  | 0.69 1.64 | 0.95  | -0.88 |       |       |      |       |  |  |
| GENE2088X | 17732_at   | 17732_at   | 1         | 0.6   | 0.63  | 0.36  | 0.7   | 0.75 | 0.36  |  |  |
|           | 0.46       | 1.49 0.8   | 0.57 1.32 | 0.61  | -0.95 |       |       |      |       |  |  |
| GENE2087X | 16634_s_at | 16634_s_at | 1         | 0.56  | 0.86  | 0.94  | 0.48  | 0.53 | 0.45  |  |  |
|           | 0.16       | 1.72 0.93  | 0.44 1.4  | 0.41  | -0.46 |       |       |      |       |  |  |
| GENE2086X | 19971_at   | 19971_at   | 1         | 0.33  | 0.15  | 0.29  | 0.97  | 0.65 | 0.49  |  |  |
|           | 0.13       | 1.3 0.29   | 0.4 1.36  | 0.62  | -0.71 |       |       |      |       |  |  |
| GENE2085X | 19698_at   | 19698_at   | 1         | 1.05  | 0.85  | 0.23  | 0.74  | 0.72 | 0.31  |  |  |
|           | 0.89       | 1.28 0.45  | 1 1.27    | 0.1   | -1.19 |       |       |      |       |  |  |
| GENE2084X | 18663_s_at | 18663_s_at | 1         | 0.59  | 0.8   | -0.06 | 0.51  | 1.23 | 1.14  |  |  |
|           | 1.02       | 0.84 0.28  | 0.31 1    | 0.76  | -0.34 |       |       |      |       |  |  |
| GENE1821X | 20438_at   | 20438_at   | 1         | 0.8   | 1.19  | 1.08  | 0.97  | 1.51 | 1.39  |  |  |
|           | 0.94       | 1.27 1.27  | 0.78 0.86 | 0.84  | -1.71 |       |       |      |       |  |  |
| GENE1820X | 20060_at   | 20060_at   | 1         | 0.48  | 0.92  | 0.84  | 0.45  | 1.05 | 0.98  |  |  |
|           | 0.59       | 0.97 0.86  | 0.4 0.49  | 0.59  | -1.01 |       |       |      |       |  |  |
| GENE1819X | 18594_at   | 18594_at   | 1         | 0.45  | 0.84  | 1.04  | 0.41  | 0.7  | 1.05  |  |  |
|           | 0.5        | 0.45 0.62  | 0.34 0.43 | 0.31  | -0.82 |       |       |      |       |  |  |
| GENE1818X | 15065_at   | 15065_at   | 1         | 0.45  | 1.01  | 0.93  | 0.57  | 0.29 | 0.41  |  |  |
|           | 0.38       | 0.79 0.62  | 0.34 0.16 | 0.31  | -0.7  |       |       |      |       |  |  |
| GENE1815X | 12544_at   | 12544_at   | 1         | 0.68  | 1.84  | 1.26  | 0.86  | 1.37 | 0     |  |  |
|           | 1.47       | 2.13 1.13  | 1.03 0.26 | 0     | -1.26 |       |       |      |       |  |  |
| GENE1817X | 20314_s_at | 20314_s_at | 1         | 0.35  | 0.7   | 0.89  | 0.43  | 0.04 | 0     |  |  |
|           | 0.37       | 1.15 0.47  | 0.21 0.62 | -0.03 | -0.23 |       |       |      |       |  |  |
| GENE1816X | 20560_at   | 20560_at   | 1         | 0.58  | 1.37  | 1.24  | 0.82  | 0.1  | 0.15  |  |  |
|           | 0.79       | 1.02 0.57  | 0.82 0.49 | -0.04 | -0.23 |       |       |      |       |  |  |
| GENE2920X | 13116_at   | 13116_at   | 1         | 0.46  | -0.13 | 0.02  | 0.41  | 0.1  | 0.98  |  |  |
|           | 0.56       | 0.95 1.18  | 0.49 0.98 | 1.48  | 0.68  |       |       |      |       |  |  |
| GENE1950X | 19212_at   | 19212_at   | 1         | 0.26  | -0.01 | 0.23  | 0.25  | 0.44 | 0.74  |  |  |
|           | 0.37       | 0.71 1.01  | 0.36 1.14 | 1.5   | 0.35  |       |       |      |       |  |  |

|           |            |            |           |       |       |       |      |       |       |   |  |
|-----------|------------|------------|-----------|-------|-------|-------|------|-------|-------|---|--|
| GENE2466X | 16370_s_at | 16370_s_at | 1         | 0.48  | 0     | 0.67  | 0.67 | 2.07  | 2.37  |   |  |
|           | 3.72       | 3.13 3.29  | 3.07 4.85 | 4.81  | 2.96  |       |      |       |       |   |  |
| GENE2082X | 20128_at   | 20128_at   | 1         | 0.67  | 0.7   | 1.41  | 1.37 | 2.28  | 3.08  |   |  |
|           | 3.56       | 3.24 3.58  | 3.45 3.74 | 4.5   | 2.32  |       |      |       |       |   |  |
| GENE2081X | 17105_at   | 17105_at   | 1         | 0.39  | 0.54  | 0.57  | 0.87 | 1.04  | 1.3   |   |  |
|           | 2.13       | 1.63 1.86  | 2.07 1.93 | 2.63  | 0.66  |       |      |       |       |   |  |
| GENE2080X | 17392_at   | 17392_at   | 1         | 0.88  | 0.29  | 0.45  | 0.76 | 0.93  | 1.85  |   |  |
|           | 1.78       | 1.45 2.65  | 1.79 2.2  | 2.95  | 0.37  |       |      |       |       |   |  |
| GENE2077X | 12539_s_at | 12539_s_at | 1         | 0.93  | -0.28 | 0.43  | 1.11 | 0.64  | 1.62  |   |  |
|           | 2.32       | 1.67 2.03  | 2.08 1.95 | 2.91  | 0.46  |       |      |       |       |   |  |
| GENE2902X | 13136_at   | 13136_at   | 1         | 0.51  | 0.05  | 0.82  | 0.49 | 0.41  | 0.7   |   |  |
|           | 1.45       | 0.74 0.88  | 1.01 1.23 | 1.25  | 0.84  |       |      |       |       |   |  |
| GENE2076X | 13439_at   | 13439_at   | 1         | 1.39  | 0.34  | 0.65  | 1.12 | 1.18  | 1.71  |   |  |
|           | 2.67       | 2.21 2.47  | 2.06 2.51 | 2.4   | 1.18  |       |      |       |       |   |  |
| GENE2075X | 16008_i_at | 16008_i_at | 1         | 0.97  | 0.08  | 0.74  | 0.96 | 0.33  | 1.24  |   |  |
|           | 1.75       | 1.34 1.5   | 1.21 1.42 | 1.46  | 0.42  |       |      |       |       |   |  |
| GENE2074X | 16009_s_at | 16009_s_at | 1         | 0.72  | 0.04  | 0.33  | 0.87 | 0.25  | 1     |   |  |
|           | 1.44       | 1.14 1.09  | 1.13 1.25 | 1.12  | 0.42  |       |      |       |       |   |  |
| GENE2079X | 16373_i_at | 16373_i_at | 1         | 0.84  | 0.09  | 1.92  | 1.48 | 0.58  | 2.76  | 3 |  |
|           | 1.97       | 3.45 3.13  | 1.89 3.45 | 0.67  |       |       |      |       |       |   |  |
| GENE2078X | 20182_at   | 20182_at   | 1         | 0.32  | 0.04  | 0.96  | 1    | 0.35  | 1.08  |   |  |
|           | 1.15       | 0.88 1.19  | 1.42 1.12 | 1.59  | 0.88  |       |      |       |       |   |  |
| GENE2130X | 19852_s_at | 19852_s_at | 1         | 0.28  | 0.31  | 0.28  | 0.41 | 0.24  | 0.51  |   |  |
|           | 0.32       | 0.32 0.64  | 0.27 0.62 | 1     | 0.19  |       |      |       |       |   |  |
| GENE2073X | 15384_at   | 15384_at   | 1         | 1.47  | 0.31  | 0.87  | 1.2  | 0.41  | 1.4   |   |  |
|           | 1.45       | 1.72 2.17  | 1.15 1.62 | 2.48  | 0.13  |       |      |       |       |   |  |
| GENE2072X | 20261_at   | 20261_at   | 1         | 0.83  | 0.19  | 0.36  | 0.93 | 0.1   | 0.61  |   |  |
|           | 0.87       | 0.87 1.09  | 0.72 0.95 | 1.36  | 0.58  |       |      |       |       |   |  |
| GENE2071X | 14928_at   | 14928_at   | 1         | 1.38  | -0.68 | 0.75  | 1.25 | 0.27  | 2.08  |   |  |
|           | 2.38       | 1.14 2.2   | 2.46 1.69 | 2.95  | 1.5   |       |      |       |       |   |  |
| GENE2070X | 14553_at   | 14553_at   | 1         | 0.85  | -1.15 | 0.44  | 1.18 | -0.53 | 1.5   |   |  |
|           | 1.77       | 0.5 2.15   | 1.81 1    | 2.74  | 1.3   |       |      |       |       |   |  |
| GENE2069X | 15337_at   | 15337_at   | 1         | 0.24  | -0.43 | 0.62  | 0.71 | -0.43 | 0.42  |   |  |
|           | 0.76       | 0.78 1.5   | 0.89 1.01 | 1.26  | 0     |       |      |       |       |   |  |
| GENE2061X | 15392_at   | 15392_at   | 1         | 0.24  | -0.14 | 0.12  | 0.63 | -0.44 | -0.81 |   |  |
|           | 1.41       | 1.31 2.23  | 1.52 1    | 2.11  | -0.68 |       |      |       |       |   |  |
| GENE2060X | 16712_at   | 16712_at   | 1         | -0.23 | 0.2   | 0.3   | 0.07 | 0.13  | -0.69 |   |  |
|           | 1.48       | 1 1.44     | 1.32 0.72 | 1.71  | -0.3  |       |      |       |       |   |  |
| GENE2444X | 16939_at   | 16939_at   | 1         | 1.55  | -0.1  | 0.85  | 0.75 | 0.32  | 0.83  |   |  |
|           | 2.57       | 3.19 3.71  | 2.12 3.19 | 4.03  | -0.46 |       |      |       |       |   |  |
| GENE2443X | 13687_s_at | 13687_s_at | 1         | 0.26  | 0.24  | -0.12 | 0.5  | 0.09  | 0.04  |   |  |
|           | 0.68       | 1.06 1.04  | 0.58 0.72 | 1.19  | -0.16 |       |      |       |       |   |  |
| GENE2442X | 14627_i_at | 14627_i_at | 1         | 0.66  | 0.15  | 0.2   | 0.43 | 0.36  | 0.63  |   |  |
|           | 0.62       | 1.31 1.51  | 0.43 1.44 | 2.01  | -0.16 |       |      |       |       |   |  |
| GENE2441X | 20434_at   | 20434_at   | 1         | 0.51  | 0.46  | 0.38  | 0.55 | 0.22  | 0.58  |   |  |
|           | 0.48       | 1.31 1.51  | 0.31 1.31 | 1.76  | -0.21 |       |      |       |       |   |  |
| GENE2129X | 14392_g_at | 14392_g_at | 1         | -0.14 | 0.42  | 0.24  | 1.05 | 0.58  | 0.79  |   |  |
|           | 0.22       | 0.98 0.74  | 0.33 1.3  | 1.35  | 0.45  |       |      |       |       |   |  |
| GENE2083X | 19164_g_at | 19164_g_at | 1         | 0.4   | -0.02 | 0.19  | 0.88 | 0.89  | 0.3   |   |  |
|           | 0.71       | 0.85 0.46  | 0.02 0.85 | 1.41  | -0.03 |       |      |       |       |   |  |
| GENE2128X | 19186_s_at | 19186_s_at | 1         | 1.29  | 1.8   | 1.53  | 1.51 | 2.24  | 1.93  |   |  |
|           | 1.9        | 2.29 2.23  | 1.69 2.21 | 1.59  | -0.2  |       |      |       |       |   |  |
| GENE2127X | 20168_s_at | 20168_s_at | 1         | 1.23  | 0.74  | 0.7   | 1.29 | 1.07  | 1.33  |   |  |
|           | 1.5        | 1.25 1.06  | 0.95 1.55 | 1.37  | 0.14  |       |      |       |       |   |  |
| GENE2117X | 18794_at   | 18794_at   | 1         | 0.4   | 0.29  | 0.22  | 0.68 | 0.75  | 1.13  |   |  |
|           | 0.68       | 0.87 0.68  | 0.83 0.72 | 0.76  | 0.15  |       |      |       |       |   |  |

|           |            |               |            |      |       |       |      |       |       |  |  |
|-----------|------------|---------------|------------|------|-------|-------|------|-------|-------|--|--|
| GENE2119X | 18946_at   | 18946_at      | 1          | 1.39 | 0.86  | 1.42  | 0.96 | 1.98  | 2.56  |  |  |
|           | 1.75       | 1.33 2.2      | 1.82 2.14  | 2.76 | 0.84  |       |      |       |       |  |  |
| GENE2118X | 13158_at   | 13158_at      | 1          | 0.71 | 0.63  | 0.83  | 0.4  | 0.89  | 1.5   |  |  |
|           | 0.8        | 0.98 1.27     | 0.65 0.98  | 1.09 | 0.48  |       |      |       |       |  |  |
| GENE2122X | 12360_at   | 12360_at      | 1          | 1.37 | 1.16  | 1.78  | 1.4  | 0.78  | 1.34  |  |  |
|           | 2.57       | 2.78 2.3      | 2.31 2.43  | 2    | 0.09  |       |      |       |       |  |  |
| GENE2121X | 17047_at   | 17047_at      | 1          | 0.71 | 0.56  | 1.12  | 0.52 | 0.69  | 1.14  |  |  |
|           | 1.8        | 1.18 1.76     | 1.56 1.45  | 1.6  | -0.16 |       |      |       |       |  |  |
| GENE2120X | 12294_s_at | 12294_s_at    | 1          | 0.8  | 0.66  | 1.5   | 0.65 | 0.6   | 1.27  |  |  |
|           | 0.97       | 0.92 0.81     | 0.83 0.56  | 1.09 | 0     |       |      |       |       |  |  |
| GENE2126X | 16533_at   | 16533_at      | 1          | 1.1  | 1.24  | 1.17  | 1.24 | 1.33  | 1.06  |  |  |
|           | 1.1        | 1.41 1.56     | 0.23 1.44  | 1.93 | -0.1  |       |      |       |       |  |  |
| GENE1828X | 13009_i_at | 13009_i_at    | 1          | 1.11 | 2.8   | 2.07  | 1.45 | 2.63  | 1.84  |  |  |
|           | 2.5        | 4.2 4.2       | 1 4.15     | 4.15 | -0.84 |       |      |       |       |  |  |
| GENE1827X | 19397_at   | 19397_at      | 1          | 0.79 | 0.5   | 0.54  | 0.52 | 0.71  | 0.75  |  |  |
|           | 0.75       | 1.41 1.36     | 0.53 1.31  | 1.66 | -0.54 |       |      |       |       |  |  |
| GENE1822X | 17909_at   | 17909_at      | 1          | 0.61 | 0.95  | 0.46  | 0.29 | 1.04  | 0.5   |  |  |
|           | 0.91       | 0.54 1.25     | 0.47 0.63  | 1.47 | -0.74 |       |      |       |       |  |  |
| GENE1831X | 18889_at   | 18889_at      | 1          | 1.23 | 0.8   | 2.58  | 1.28 | 0.58  | 2.2   |  |  |
|           | 1.58       | 2.83 3.45     | 1.68 2.95  | 3.65 | -0.73 |       |      |       |       |  |  |
| GENE1830X | 17824_s_at | 17824_s_at    | 1          | 0.7  | 0.32  | 1.34  | 0.8  | 1.39  | 2.06  |  |  |
|           | 1.45       | 2.08 2.88     | 1.7 1.58   | 2.58 | -1.26 |       |      |       |       |  |  |
| GENE1829X | 19835_at   | 19835_at      | 1          | 0.07 | 0.45  | 1.08  | 0.74 | 0.36  | 0.77  |  |  |
|           | 0.65       | 1.21 1.51     | 0.57 1.12  | 1.08 | -1    |       |      |       |       |  |  |
| GENE1824X | 17521_at   | 17521_at      | 1          | 0.68 | 0.74  | 1.5   | 1.06 | 0.23  | 1.01  |  |  |
|           | 1.04       | 1.16 2.38     | 1.15 0.95  | 2    | 0.25  |       |      |       |       |  |  |
| GENE1823X | 13435_at   | 13435_at      | 1          | 0.69 | 1.18  | 2.3   | 0.96 | 1.12  | 1.82  |  |  |
|           | 0.9        | 1.26 2.69     | 0.95 1.19  | 3.08 | -0.7  |       |      |       |       |  |  |
| GENE2068X | 12431_at   | 12431_at      | 1          | 0.76 | -1.48 | 0.26  | 0.84 | 0.71  | 1     |  |  |
|           | 2.13       | 1.71 1.84     | 1.37 2.19  | 1.67 | -0.32 |       |      |       |       |  |  |
| GENE2067X | 20294_at   | 20294_at      | 1          | 1.24 | -0.73 | 0.28  | 1.71 | -0.07 | 0.9   |  |  |
|           | 1.58       | 1.1 1.62      | 1.86 2.36  | 2.74 | 0.28  |       |      |       |       |  |  |
| GENE2066X | 19992_at   | 19992_at      | 1          | 0.87 | -1    | -0.37 | 1.11 | -0.14 | 0.32  |  |  |
|           | 1.35       | 1.26 1.59     | 1.44 1.58  | 2.57 | -0.77 |       |      |       |       |  |  |
| GENE2064X | 17982_s_at | 17982_s_at    | 1          | 0.55 | -0.51 | 0.28  | 0.86 | -0.15 | 1.05  |  |  |
|           | 0.61       | 1 0.68        | 1.05 0.73  | 0.58 | -0.68 |       |      |       |       |  |  |
| GENE2063X | 16617_s_at | 16617_s_at    | 1          | 0.42 | -0.46 | 0.3   | 0.18 | -0.32 | 0.49  |  |  |
|           | 1.09       | 0.49 0.71     | 0.3 0.04   | 0.12 | -0.02 |       |      |       |       |  |  |
| GENE2059X | 13198_i_at | 13198_i_at    | 1          | 0.96 | 0.2   | 1.68  | 1.14 | 0.05  | 0.47  |  |  |
|           | 0.61       | 0.46 0.58     | 0.7 0.75   | 0.86 | 0.06  |       |      |       |       |  |  |
| GENE2058X | 20527_s_at | 20527_s_at    | 1          | 0.75 | 0.31  | 0.5   | 1.01 | 0.18  | 0.54  |  |  |
|           | 0.62       | 0.43 0.7      | 0.69 0.52  | 0.86 | -0.39 |       |      |       |       |  |  |
| GENE2057X | 17948_i_at | 17948_i_at    | 1          | 1.06 | 0     | 0.48  | 0.73 | 0.19  | -0.06 |  |  |
|           | 0.92       | 0.3 0.64      | 0.94 0     | 0.67 | 0.7   |       |      |       |       |  |  |
| GENE2056X | 18745_f_at | 18745_f_at    | 1          | 1.51 | 0.49  | 0.96  | 0.96 | 0     | 0.28  |  |  |
|           | 1.73       | 0.35 1.12     | 1.21 -0.39 | 0.86 | 0     |       |      |       |       |  |  |
| GENE2921X | 18228_at   | 18228_at      | 1          | 1.11 | -0.37 | -1.1  | 1.35 | 1.58  | 1.99  |  |  |
|           | 1.63       | 1.68 0.87     | 1.61 2.34  | 2.56 | 1.37  |       |      |       |       |  |  |
| GENE2414X | 12805_s_at | 12805_s_at    | 1          | 1.26 | -0.17 | -0.58 | 0.62 | 0.25  | 0.41  |  |  |
|           | 1.31       | 1.09 0.42     | 1.31 1.2   | 0.99 | 0.44  |       |      |       |       |  |  |
| GENE2402X | 17441_s_at | 17441_s_at    | 1          | 0.64 | -0.39 | -1.33 | 0.55 | 0.85  | 0.28  |  |  |
|           | 1.21       | 0.56 -0.00759 | 1.4        | 1.2  | 0.76  | 0     |      |       |       |  |  |
| GENE2401X | 17442_i_at | 17442_i_at    | 1          | 0.89 | -0.39 | -1.28 | 0.83 | 0.82  | 0.39  |  |  |
|           | 1.49       | 0.56 0.12     | 1.52 1.18  | 0.93 | -0.37 |       |      |       |       |  |  |
| GENE2436X | 16779_at   | 16779_at      | 1          | 0    | -0.41 | -0.39 | 0.2  | 0.24  | 0.18  |  |  |
|           | 0.62       | 1.08 0.46     | 0.94 1.39  | 1.2  | 0.41  |       |      |       |       |  |  |

|           |            |            |       |       |         |       |       |       |       |   |  |
|-----------|------------|------------|-------|-------|---------|-------|-------|-------|-------|---|--|
| GENE2435X | 16441_s_at | 16441_s_at | 1     | 0.11  | -0.23   | -0.43 | 0.33  | 0.06  | 0.01  |   |  |
|           | 0.75       | 0.51       | 0.46  | 0.69  | 1.25    | 1.06  | 0.8   |       |       |   |  |
| GENE2434X | 13040_at   | 13040_at   | 1     | 0.37  | -0.23   | -0.63 | 0.41  | -0.04 | 0.25  |   |  |
|           | 0.3        | 0.68       | 0.06  | 0.41  | 1.31    | 0.94  | 0.79  |       |       |   |  |
| GENE2433X | 19597_s_at | 19597_s_at | 1     | 0.43  | -0.58   | -0.78 | 0.7   | 0.14  | 0.09  |   |  |
|           | 0.48       | 0.82       | 0.3   | 0.48  | 1.19    | 0.84  | 0.61  |       |       |   |  |
| GENE2432X | 12399_at   | 12399_at   | 1     | 0.4   | -0.47   | -0.71 | 0.31  | 0.16  | 0.28  | - |  |
|           | 0.12       | 0.61       | 0.38  | 0.87  | 1.22    | 1.17  | 0.56  |       |       |   |  |
| GENE2400X | 14310_at   | 14310_at   | 1     | 0.68  | -1.08   | -2.1  | 1.33  | 1     | -0.03 |   |  |
|           | 1.22       | 0.61       | 0.32  | 1.61  | 2.66    | 1.69  | 0.76  |       |       |   |  |
| GENE2399X | 19869_at   | 19869_at   | 1     | 0.04  | -0.29   | -1.58 | 0.51  | 1.05  | 0.31  |   |  |
|           | 0.75       | 0.1        | 0     | 0.56  | 1.15    | 0.93  | 1.1   |       |       |   |  |
| GENE2398X | 18429_at   | 18429_at   | 1     | 0.23  | -1.05   | -0.79 | -0.08 | -0.18 | 0.25  |   |  |
|           | 0.3        | 0.31       | 0.1   | 0.23  | 0.97    | 1.05  | -0.19 |       |       |   |  |
| GENE2431X | 19823_at   | 19823_at   | 1     | 0.54  | 0.69    | -0.46 | -0.28 | 0.2   | 0.73  | - |  |
|           | 0.28       | 2.34       | 0.47  | 0.54  | 2.74    | 1.11  | 1.87  |       |       |   |  |
| GENE2430X | 16702_at   | 16702_at   | 1     | 0.12  | 0.03    | -0.44 | 0.25  | 0.43  | 0.27  |   |  |
|           | 0.19       | 1.02       | 0.21  | 0.14  | 1.37    | 0.16  | 0.65  |       |       |   |  |
| GENE2429X | 12158_at   | 12158_at   | 1     | 0.54  | 0.4     | 0.11  | 0.17  | 0     | 0.43  |   |  |
|           | 0.75       | 1.5        | -0.03 | 0.93  | 1.69    | 0.4   | 0.61  |       |       |   |  |
| GENE2428X | 15489_at   | 15489_at   | 1     | 0.32  | 0.3     | 0.06  | -0.21 | 0.2   | 0.17  |   |  |
|           | 0.76       | 0.95       | -0.19 | 0.21  | 1.29    | 0.25  | 0.88  |       |       |   |  |
| GENE2427X | 20645_s_at | 20645_s_at | 1     | 0.14  | 0.16    | -0.32 | 0.25  | 1     | -0.26 |   |  |
|           | 0.37       | 1.17       | 0.18  | 0.18  | 1.66    | 0.43  | 0.38  |       |       |   |  |
| GENE2426X | 20552_at   | 20552_at   | 1     | -0.01 | 0.2     | -0.38 | -0.16 | 0.34  | -0.13 |   |  |
|           | 0.16       | 0.82       | -0.02 | 0.13  | 1.23    | 0.31  | 0.15  |       |       |   |  |
| GENE2425X | 20281_at   | 20281_at   | 1     | -0.05 | -0.05   | -0.38 | -0.39 | 0.46  | 0.06  |   |  |
|           | 0.46       | 1.04       | -0.17 | 0.69  | 1.33    | 0.3   | 0.22  |       |       |   |  |
| GENE2424X | 15367_at   | 15367_at   | 1     | 0.65  | -0.35   | -0.76 | 0.07  | -0.52 | -1.06 | 1 |  |
|           | 1.47       | 0.25       | 1.21  | 1.6   | 0.7     | 0.77  |       |       |       |   |  |
| GENE2423X | 14744_at   | 14744_at   | 1     | 0.51  | 0.2     | -1.41 | 0.58  | 0.82  | -0.41 |   |  |
|           | 1.71       | 1.65       | 0.66  | 1.4   | 2.13    | 1.14  | 1.24  |       |       |   |  |
| GENE2419X | 20379_at   | 20379_at   | 1     | 0.39  | 0.38    | -0.48 | 0.4   | 0.21  | 0.07  |   |  |
|           | 0.61       | 0.94       | 0.33  | 0.56  | 1.2     | 0.62  | 0.74  |       |       |   |  |
| GENE2420X | 14459_at   | 14459_at   | 1     | 0.37  | 0.29    | -0.57 | 0.69  | 0.18  | -0.56 |   |  |
|           | 0.62       | 0.73       | 0.32  | 0.43  | 1.07    | 0.38  | 1.05  |       |       |   |  |
| GENE2445X | 15461_at   | 15461_at   | 1     | 0.4   | 0.35    | 0.05  | 0.72  | 0.4   | 0.54  |   |  |
|           | 0.81       | 1.3        | 0.87  | 0.72  | 1.01    | 0.7   | -0.42 |       |       |   |  |
| GENE2472X | 15341_at   | 15341_at   | 1     | 0.82  | 0.32    | 0.45  | 1.4   | 0.74  | 0.6   |   |  |
|           | 2.86       | 2.77       | 2.95  | 2.56  | 3.21    | 3.5   | 0.41  |       |       |   |  |
| GENE2471X | 18526_at   | 18526_at   | 1     | 0.67  | 0.67    | 0.48  | 1.37  | 0.67  | 0.37  |   |  |
|           | 2.26       | 2.53       | 1.8   | 2.8   | 3.17    | 2.67  | 0     |       |       |   |  |
| GENE2470X | 13255_i_at | 13255_i_at | 1     | 1.15  | 0.75    | -0.24 | 1.08  | 1.27  | 0.58  |   |  |
|           | 2.66       | 2.8        | 1.82  | 2.14  | 2.96    | 2.62  | 0.59  |       |       |   |  |
| GENE2469X | 13256_s_at | 13256_s_at | 1     | 0.7   | 0.38    | -0.2  | 0.35  | 0.49  | 0.27  |   |  |
|           | 2.11       | 2.17       | 1.22  | 1.71  | 2.32    | 2.05  | 0.05  |       |       |   |  |
| GENE2417X | 19345_at   | 19345_at   | 1     | 2     | 0.26    | 0     | 2     | 1.26  | 1.37  |   |  |
|           | 3.37       | 2.96       | 1.58  | 2.53  | 2.88    | 2.43  | 0     |       |       |   |  |
| GENE2416X | 17252_at   | 17252_at   | 1     | 0.97  | 0       | 0.07  | 1.03  | 0.44  | 0.6   |   |  |
|           | 1.51       | 1.22       | 1     | 1.31  | 1.57    | 1.34  | 0.55  |       |       |   |  |
| GENE2415X | 14391_at   | 14391_at   | 1     | 0.94  | 0.00699 |       | 0.08  | 0.61  | 0.45  |   |  |
|           | 0.47       | 1.1        | 0.98  | 0.56  | 0.84    | 1.27  | 1.11  | 0.28  |       |   |  |
| GENE2412X | 16499_at   | 16499_at   | 1     | 0.38  | 0.19    | -0.14 | 0.71  | 0.41  | 0.5   |   |  |
|           | 1.17       | 0.69       | 0.78  | 0.98  | 0.98    | 1.15  | 0.08  |       |       |   |  |
| GENE2440X | 18253_s_at | 18253_s_at | 1     | 0.98  | 0.08    | -1.04 | 1.07  | 0.96  | 0.3   |   |  |
|           | 1.66       | 1.59       | 1.06  | 1.52  | 2.02    | 1.38  | -0.2  |       |       |   |  |



|           |            |            |       |       |       |       |       |       |       |   |  |
|-----------|------------|------------|-------|-------|-------|-------|-------|-------|-------|---|--|
| GENE2439X | 16571_s_at | 16571_s_at | 1     | 0.64  | 0.42  | -0.96 | 0.65  | 0.34  | -0.15 |   |  |
|           | 0.83       | 1.47       | 0.36  | 0.9   | 1.94  | 1.1   | 0.15  |       |       |   |  |
| GENE2437X | 16600_s_at | 16600_s_at | 1     | 0.43  | -0.41 | -0.38 | 0.36  | -0.06 | 0.22  |   |  |
|           | 0.72       | 0.95       | 0.31  | 1.07  | 1.44  | 0.79  | -0.38 |       |       |   |  |
| GENE2438X | 18859_at   | 18859_at   | 1     | 0.39  | 0.07  | -0.1  | 0.37  | 0.2   | 0.24  |   |  |
|           | 0.43       | 0.61       | 0.05  | 0.2   | 1.01  | 0.81  | -0.16 |       |       |   |  |
| GENE2392X | 18119_s_at | 18119_s_at | 1     | 0.23  | 0.61  | -0.53 | 0.61  | 1.16  | 0.2   |   |  |
|           | 0.66       | 1.3        | -0.24 | 0.86  | 1.74  | 0.5   | 0.07  |       |       |   |  |
| GENE2391X | 18174_at   | 18174_at   | 1     | 0.66  | 0.93  | -0.46 | 1.23  | 0.93  | 0     | 1 |  |
|           | 1.17       | 0.3        | 0.95  | 1.54  | 0.47  | 0.28  |       |       |       |   |  |
| GENE2210X | 16342_at   | 16342_at   | 1     | 0.85  | 0.53  | -0.35 | 0.85  | 1.37  | 0.38  |   |  |
|           | 1.16       | 1.98       | 0.51  | 1.17  | 1.7   | 0.23  | 0.42  |       |       |   |  |
| GENE2447X | 20397_at   | 20397_at   | 1     | 0.73  | 0.34  | 0.21  | 0.77  | 0.62  | 0.36  |   |  |
|           | 0.58       | 1.2        | 0.55  | 0.87  | 1.32  | 0.68  | 0.25  |       |       |   |  |
| GENE2212X | 15919_at   | 15919_at   | 1     | 1.01  | 0.85  | -0.06 | 1.12  | 1.63  | 0.33  |   |  |
|           | 1.84       | 2.64       | 0.88  | 2.32  | 3.07  | 1.41  | 1.17  |       |       |   |  |
| GENE2211X | 20373_at   | 20373_at   | 1     | 1.41  | 0.73  | -0.03 | 1.22  | 1.8   | 0.18  |   |  |
|           | 2.32       | 2.75       | 1.01  | 2.07  | 2.77  | 1.33  | 0.84  |       |       |   |  |
| GENE2208X | 17748_at   | 17748_at   | 1     | 2.7   | 1.92  | -0.16 | 2.51  | 2.53  | 0.33  |   |  |
|           | 3.37       | 3.03       | 1.58  | 3.08  | 3.03  | 1.39  | 2.13  |       |       |   |  |
| GENE2207X | 12274_at   | 12274_at   | 1     | 1.45  | 0.95  | 0.31  | 1.11  | 1.07  | -0.23 |   |  |
|           | 0.92       | 1.78       | 0.73  | 1.3   | 1.38  | 0.83  | 0.5   |       |       |   |  |
| GENE2198X | 20059_at   | 20059_at   | 1     | 1.58  | 1.24  | -0.58 | 1.13  | 1     | 0.8   |   |  |
|           | 1.37       | 2.2        | 1.36  | 0.84  | 2.85  | 1.11  | 1.11  |       |       |   |  |
| GENE2197X | 12229_at   | 12229_at   | 1     | 0.75  | 0.85  | -0.41 | 0.75  | 0.49  | 0.47  |   |  |
|           | 0.69       | 1.17       | 0.34  | 0.53  | 1.35  | 0.54  | 0.07  |       |       |   |  |
| GENE2209X | 13022_at   | 13022_at   | 1     | 1.15  | 0.17  | 0.02  | 0.67  | 0.52  | 0.03  |   |  |
|           | 1.15       | 1.81       | 0.5   | 1.39  | 1.59  | 0.22  | 0.79  |       |       |   |  |
| GENE2189X | 15176_s_at | 15176_s_at | 1     | 0.89  | 0.82  | -0.41 | 0.53  | 0.86  | -0.02 |   |  |
|           | 1.33       | 1.51       | -0.1  | 1.66  | 1.74  | 0.47  | 1.15  |       |       |   |  |
| GENE2188X | 19207_at   | 19207_at   | 1     | 1.35  | 0.48  | -0.47 | 0.98  | 1.17  | -0.21 |   |  |
|           | 1.33       | 1.58       | 0.04  | 1.23  | 1.71  | 0.59  | 1.35  |       |       |   |  |
| GENE2187X | 20246_s_at | 20246_s_at | 1     | 1.05  | 0.4   | -0.28 | 0.94  | 0.95  | 0.19  |   |  |
|           | 1.25       | 1.5        | 0.14  | 1.07  | 1.66  | 0.49  | 1.59  |       |       |   |  |
| GENE2094X | 20405_at   | 20405_at   | 1     | 1.01  | 0.56  | 0.19  | 0.96  | 1.33  | 0.82  |   |  |
|           | 1.44       | 1.15       | 0.19  | 1.26  | 1.21  | 0.51  | 0.63  |       |       |   |  |
| GENE2093X | 19871_at   | 19871_at   | 1     | 0.68  | 0.25  | 0     | 0.4   | 0.73  | 0.68  |   |  |
|           | 0.79       | 0.83       | 0.23  | 0.8   | 1.12  | 0.4   | 0.96  |       |       |   |  |
| GENE2643X | 19423_at   | 19423_at   | 1     | -0.43 | 0.38  | 0.09  | -0.75 | 0.33  | 0.56  |   |  |
|           | 1.17       | 1.54       | 0.56  | 0.79  | 1.33  | 1.04  | 1.13  |       |       |   |  |
| GENE2092X | 17445_at   | 17445_at   | 1     | 0.51  | 0.04  | 0.94  | 0.45  | 0.69  | 1.72  |   |  |
|           | 1.78       | 1.46       | 0.65  | 1.45  | 1.46  | 0.18  | 0.44  |       |       |   |  |
| GENE2065X | 18641_at   | 18641_at   | 1     | -0.09 | -0.53 | 0.16  | 0.08  | -0.24 | 1.05  |   |  |
|           | 1.67       | 1.45       | 0.81  | 1.28  | 0.98  | 0.81  | -0.16 |       |       |   |  |
| GENE2323X | 12246_s_at | 12246_s_at | 1     | -0.34 | -0.28 | -0.32 | -0.1  | 0.55  | 0.26  | 0 |  |
|           | 1.64       | 1.09       | -0.1  | 1.81  | 1.79  | -1.24 |       |       |       |   |  |
| GENE2322X | 14007_at   | 14007_at   | 1     | 0.08  | -0.16 | 0.32  | -0.09 | 0.4   | 0.7   | - |  |
|           | 0.09       | 1.04       | 0.45  | -0.09 | 1.14  | 0.76  | -0.84 |       |       |   |  |
| GENE2321X | 12057_at   | 12057_at   | 1     | 0.02  | 0.25  | 0.07  | -0.35 | 0.4   | 0.17  |   |  |
|           | 0.37       | 0.74       | 0.53  | 0.3   | 0.82  | 1.03  | -0.67 |       |       |   |  |
| GENE2326X | 12440_at   | 12440_at   | 1     | -0.17 | 0.77  | 0.51  | 0.07  | 0.83  | 0.27  |   |  |
|           | 0.15       | 2.31       | 1.21  | 0.13  | 1.84  | 0.89  | -0.2  |       |       |   |  |
| GENE2325X | 17139_at   | 17139_at   | 1     | -0.04 | 0.38  | 0.45  | 0     | 0.14  | 0.04  | - |  |
|           | 0.04       | 1.5        | 0.55  | -0.13 | 1.2   | 0.67  | -0.28 |       |       |   |  |
| GENE2324X | 14412_at   | 14412_at   | 1     | 0.22  | 0.26  | 0.09  | 0.08  | 0.56  | 0.14  |   |  |
|           | 0.11       | 1.21       | 0.4   | -0.03 | 0.87  | 0.58  | -0.58 |       |       |   |  |

|           |            |            |       |          |       |       |       |       |       |   |
|-----------|------------|------------|-------|----------|-------|-------|-------|-------|-------|---|
| GENE2256X | 16119_s_at | 16119_s_at | 1     | -0.46    | 1.05  | 0.65  | -0.54 | 0.23  | 0.58  | - |
|           | 0.54       | 1.9        | 1.13  | -0.8     | 1.79  | 0.85  | -1.69 |       |       |   |
| GENE2255X | 18014_s_at | 18014_s_at | 1     | -0.02    | 0.4   | 0.35  | -0.23 | 0.4   | 0     | - |
|           | 0.44       | 1.14       | 0.42  | -0.52    | 1.3   | 0.56  | -0.36 |       |       |   |
| GENE2254X | 16711_s_at | 16711_s_at | 1     | -0.13    | 0     | 0.5   | -0.22 | 0.27  | 0.21  | - |
|           | 0.22       | 0.94       | 0.47  | -0.08    | 1.02  | 0.25  | -0.2  |       |       |   |
| GENE2331X | 17554_at   | 17554_at   | 1     | -0.45    | 0.13  | -0.61 | 0.13  | 0.92  | 0     |   |
|           | 0.03       | 3.18       | 1.54  | 0.31     | 3.03  | 1.62  | -0.67 |       |       |   |
| GENE2329X | 17757_at   | 17757_at   | 1     | -0.24    | 0.32  | -0.09 | 0.1   | 0     | 0.32  |   |
|           | 0.82       | 2.48       | 1.08  | 0.54     | 2.29  | 1.28  | 0     |       |       |   |
| GENE2267X | 13278_f_at | 13278_f_at | 1     | -0.77    | 0     | 0     | -0.58 | 0.84  | 0.67  |   |
|           | 0.5        | 4.15       | 1.92  | -1.26    | 4.01  | 1.76  | 1.26  |       |       |   |
| GENE2266X | 12600_at   | 12600_at   | 1     | -0.08    | 0.41  | 0.32  | -0.11 | 0.25  | -0.1  |   |
|           | 0.05       | 1.59       | 1.04  | -0.11    | 1.59  | 0.87  | 0.45  |       |       |   |
| GENE2265X | 15883_at   | 15883_at   | 1     | -0.48    | 0.22  | 0.09  | 0.01  | 0.1   | 0.17  |   |
|           | 0.03       | 1.45       | 0.78  | -0.16    | 1.46  | 0.97  | 0.23  |       |       |   |
| GENE2264X | 19157_at   | 19157_at   | 1     | 0.2      | 0.29  | 0.08  | 0.53  | 0.14  | 0.1   |   |
|           | 0.07       | 1.41       | 0.57  | -0.73    | 1.15  | 0.75  | 0.32  |       |       |   |
| GENE2263X | 18873_at   | 18873_at   | 1     | 0.47     | 0.49  | -0.15 | -0.04 | 0.09  | -0.33 |   |
|           | 0.5        | 1.46       | 0.54  | -0.12    | 1.39  | 0.54  | 0.49  |       |       |   |
| GENE2262X | 15457_at   | 15457_at   | 1     | 0.22     | 0.33  | -0.15 | -0.2  | 0.34  | 0.19  |   |
|           | 0.06       | 1.21       | 0.23  | -0.33    | 1.16  | 0.41  | 0.57  |       |       |   |
| GENE2261X | 14450_at   | 14450_at   | 1     | 0.06     | 0.47  | -0.44 | -0.05 | 0.33  | -0.16 | - |
|           | 0.01       | 1.06       | 0.22  | -0.16    | 1.12  | 0.56  | 0.54  |       |       |   |
| GENE2260X | 16819_at   | 16819_at   | 1     | -0.42    | 1.72  | 0.41  | -1.58 | 1.54  | -0.73 | - |
|           | 0.03       | 3.12       | 1.69  | -1.7     | 3     | 1.84  | 0     |       |       |   |
| GENE2259X | 20646_at   | 20646_at   | 1     | -1.24    | 1.22  | 0.5   | -1.24 | 1.5   | -0.07 | - |
|           | 1.24       | 2.58       | 1.77  | -1.07    | 2     | 1.3   | 0.85  |       |       |   |
| GENE2258X | 18421_at   | 18421_at   | 1     | -0.55    | 0.2   | 0.06  | -0.16 | 0.42  | -0.28 | - |
|           | 0.91       | 1.4        | 0.76  | -0.51    | 1.24  | 0.54  | -0.37 |       |       |   |
| GENE2257X | 20519_at   | 20519_at   | 1     | 0        | 0     | -0.77 | -0.89 | 1.17  | -0.19 | - |
|           | 0.37       | 1.28       | 0.5   | -0.53    | 1.35  | 0.79  | -0.1  |       |       |   |
| GENE2251X | 13653_at   | 13653_at   | 1     | 0.39     | 0.32  | -1.34 | 0.39  | 0.32  | -0.95 |   |
|           | 1.17       | 1.43       | 0.44  | 0.55     | 1.45  | 0.47  | -1.25 |       |       |   |
| GENE2250X | 12912_at   | 12912_at   | 1     | 0.2      | 0.19  | -0.21 | 0.2   | -0.08 | -0.63 |   |
|           | 0.48       | 1.25       | 0.59  | 0.49     | 0.95  | 0.56  | -0.21 |       |       |   |
| GENE2249X | 12446_at   | 12446_at   | 1     | -1.1     | -0.05 | -0.69 | 0.04  | 0.32  | -0.33 |   |
|           | 0.55       | 1.21       | 0.12  | 0.04     | 0.97  | 0.93  | -0.52 |       |       |   |
| GENE2248X | 14554_at   | 14554_at   | 1     | -0.37    | -0.11 | -0.47 | -1.24 | -0.07 | -0.64 |   |
|           | 0.31       | 1.45       | 1.48  | -0.35    | 1.07  | 1.67  | -1.54 |       |       |   |
| GENE2247X | 12031_at   | 12031_at   | 1     | 0.26     | 0.19  | 0.1   | 0.19  | 0.05  | -0.3  |   |
|           | 0.29       | 1.02       | 0.94  | -0.00928 | 0.6   | 0.6   | -0.87 |       |       |   |
| GENE2246X | 13099_s_at | 13099_s_at | 1     | 0.05     | 0.3   | -0.31 | 0.07  | 0.16  | -0.26 |   |
|           | 0.11       | 0.52       | 0.4   | -0.09    | 0.47  | 0.51  | -1.27 |       |       |   |
| GENE2389X | 12052_at   | 12052_at   | 1     | 0.44     | 1.13  | -0.27 | 0.26  | 0.94  | -0.68 |   |
|           | 0.08       | 1.13       | -0.59 | 0.53     | 1.44  | -0.14 | 0     |       |       |   |
| GENE2226X | 15891_at   | 15891_at   | 1     | 0.06     | 3.26  | -0.14 | -0.13 | 2.07  | -0.67 |   |
|           | 0.62       | 2.58       | 0.15  | -0.13    | 1.58  | -0.33 | -1.18 |       |       |   |
| GENE2233X | 18165_at   | 18165_at   | 1     | -0.07    | 0.56  | -0.14 | -0.67 | 1.25  | -0.16 |   |
|           | 0.6        | 1.51       | -0.14 | -0.23    | 1.28  | -0.23 | 0.15  |       |       |   |
| GENE2232X | 17182_at   | 17182_at   | 1     | 0.23     | 0.76  | -0.32 | -0.16 | 0.71  | -0.29 |   |
|           | 0.48       | 1.22       | 0.2   | -0.32    | 1.24  | 0.26  | -0.16 |       |       |   |
| GENE2245X | 19708_at   | 19708_at   | 1     | 0.15     | -0.02 | -0.46 | 0.17  | 0.23  | 0.17  | - |
|           | 0.01       | 0.97       | -0.15 | -0.29    | 1.29  | 0.24  | -0.69 |       |       |   |
| GENE2244X | 17859_at   | 17859_at   | 1     | 0.09     | -0.24 | 0.06  | -0.25 | 0.52  | 0.22  |   |
|           | 0.24       | 1.34       | 0     | -0.03    | 0.95  | -0.58 | -0.5  |       |       |   |

|           |            |            |       |         |       |       |       |      |       |   |
|-----------|------------|------------|-------|---------|-------|-------|-------|------|-------|---|
| GENE2253X | 15897_s_at | 15897_s_at | 1     | 0       | 0.88  | 0     | 0.07  | 0.84 | 0.51  | - |
| 0.34      | 1.2        | 0.67       | -0.92 | 1.43    | 0.64  | -0.24 |       |      |       |   |
| GENE2252X | 16681_s_at | 16681_s_at | 1     | -0.28   | 0.96  | 0.39  | -0.25 | 0.94 | 0.3   | - |
| 0.4       | 0.98       | 0.61       | -1.21 | 0.79    | 0.95  | -0.79 |       |      |       |   |
| GENE2235X | 13063_at   | 13063_at   | 1     | -0.82   | 1.16  | -0.47 | -0.76 | 0.56 | -0.13 | - |
| 0.52      | 1.48       | 0.02       | -1.27 | 0.97    | -0.21 | -0.67 |       |      |       |   |
| GENE2234X | 20569_s_at | 20569_s_at | 1     | -0.35   | 1.16  | -0.18 | -0.37 | 1.33 | 0.22  | - |
| 0.7       | 0.69       | -0.18      | -1.33 | 0.63    | -0.39 | -0.24 |       |      |       |   |
| GENE2243X | 16991_at   | 16991_at   | 1     | -0.32   | 0.37  | 0     | 0.16  | 1.08 | 1.1   | - |
| 0.38      | 0.55       | -0.58      | -0.74 | 0.74    | 0.2   | -0.55 |       |      |       |   |
| GENE2739X | 14620_at   | 14620_at   | 1     | 0.27    | 1.5   | 1.02  | 0     | 1.68 | 0.86  |   |
| 0.4       |            | 1.92       | 0.82  | -0.07   | 2.35  | 1.94  | 2.56  |      |       |   |
| GENE2735X | 13564_at   | 13564_at   | 1     | 0.1     | 1.21  | 0.3   | -0.2  | 1.61 | 0.57  |   |
| 0.23      |            | 2.13       | 1.11  | 0.28    | 2.29  | 1.22  | 2.27  |      |       |   |
| GENE2734X | 20022_at   | 20022_at   | 1     | 0.02    | 0.45  | 0.19  | 0.08  | 0.79 | 0.18  | - |
| 0.04      | 0.95       | 0.25       | -0.02 | 1.02    | 0.59  | 1.09  |       |      |       |   |
| GENE2722X | 19364_at   | 19364_at   | 1     | -0.07   | 0.52  | 0.18  | 0.15  | 0.89 | 0.12  |   |
| 0.22      |            | 1.07       | 0.11  | 0.00851 |       | 1.64  | 1.03  | 1.32 |       |   |
| GENE2763X | 16288_at   | 16288_at   | 1     | 0.64    | 1.41  | 0.88  | 0.67  | 1.19 | 0.98  |   |
| 0.94      |            | 2.34       | 1.49  | 0.39    | 2.32  | 1.78  | 2.53  |      |       |   |
| GENE2716X | 16522_at   | 16522_at   | 1     | 0.34    | 1.29  | 0.6   | 0.42  | 0.95 | 0.4   |   |
| 0.46      |            | 1.73       | 0.86  | 0.47    | 1.96  | 0.93  | 1.78  |      |       |   |
| GENE2736X | 19878_at   | 19878_at   | 1     | 0.29    | 2.32  | 1.12  | 0.33  | 1.89 | 0.96  | 0 |
| 2.87      |            | 1.61       | 0.47  | 2.54    | 1.47  | 3.42  |       |      |       |   |
| GENE2715X | 18673_at   | 18673_at   | 1     | 0.1     | 0.74  | 0.17  | 0.23  | 0.85 | 0.26  |   |
| 0.56      |            | 1.29       | 0.4   | 0.5     | 1.26  | 0.55  | 1.19  |      |       |   |
| GENE2717X | 13123_at   | 13123_at   | 1     | 0.81    | 0.94  | 0.45  | 0.56  | 0.94 | 0.75  |   |
| 0.64      |            | 1.88       | 0.92  | 0.5     | 1.91  | 0.48  | 1.94  |      |       |   |
| GENE2185X | 14448_at   | 14448_at   | 1     | 1.32    | 2.46  | 1.15  | 1.29  | 2.3  | 1.28  |   |
| 1.19      |            | 2.79       | 0.82  | 1.36    | 2.79  | 1.01  | 3.45  |      |       |   |
| GENE2284X | 14136_at   | 14136_at   | 1     | 0.52    | 1.26  | 0.48  | -0.01 | 1.06 | 0.5   |   |
| 0.03      |            | 1.45       | 0.88  | 0.15    | 1.25  | 0.94  | 0.48  |      |       |   |
| GENE1874X | 12231_at   | 12231_at   | 1     | 0.15    | 1.16  | 0.73  | -0.08 | 0.85 | 0.08  |   |
| 0.07      |            | 1.51       | 0.73  | 0.11    | 1.38  | 0.81  | 0.52  |      |       |   |
| GENE1878X | 13850_i_at | 13850_i_at | 1     | -0.01   | 1     | 0.56  | 0.18  | 0.95 | 0.12  |   |
| 0.09      |            | 1          | 0.82  | 0.03    | 0.75  | 0.48  | 0.72  |      |       |   |
| GENE1880X | 19655_at   | 19655_at   | 1     | 0.49    | 2.64  | 1.12  | -0.26 | 2.56 | 0.73  |   |
| 0.18      |            | 2.73       | 1.04  | 0.64    | 3.05  | 0.47  | 1.89  |      |       |   |
| GENE1879X | 16483_at   | 16483_at   | 1     | 0.73    | 1.93  | 0.83  | 0.22  | 1.73 | 0.73  |   |
| 0.28      |            | 2.22       | 0.77  | 0       | 1.9   | 0.63  | 1.39  |      |       |   |
| GENE1883X | 15379_at   | 15379_at   | 1     | 0.34    | 1.74  | 0.96  | 0.06  | 1.11 | -0.06 |   |
| 0.31      |            | 1.62       | 0.86  | -0.58   | 1.95  | 0.5   | 1.27  |      |       |   |
| GENE1882X | 19635_at   | 19635_at   | 1     | 0.36    | 1.72  | 1.17  | 0.22  | 1.15 | 0.14  |   |
| 0.77      |            | 2.48       | 1.65  | 0.11    | 2.02  | 1.39  | 1.73  |      |       |   |
| GENE1881X | 17174_at   | 17174_at   | 1     | 0.71    | 1.4   | 1.01  | 0.04  | 0.65 | -0.03 |   |
| 0.46      |            | 1.7        | 0.93  | -0.08   | 1.45  | 0.49  | 1.21  |      |       |   |
| GENE2395X | 16299_at   | 16299_at   | 1     | 0.72    | 2.11  | -0.94 | 0.79  | 2.68 | -0.79 |   |
| 1.14      |            | 2.64       | -0.47 | 0.86    | 3.4   | 0.81  | 1.48  |      |       |   |
| GENE2394X | 12000_at   | 12000_at   | 1     | 0.71    | 1.29  | -0.03 | 0.33  | 1.07 | -0.22 |   |
| 0.65      |            | 2          | 0.06  | 0.3     | 1.98  | 0.2   | 0.88  |      |       |   |
| GENE2283X | 16840_at   | 16840_at   | 1     | 0.2     | 2.05  | 0.04  | -0.35 | 2.27 | 0.11  |   |
| 0.32      |            | 3.36       | 0.51  | 0.78    | 3.22  | 0.48  | 1.51  |      |       |   |
| GENE2186X | 15129_at   | 15129_at   | 1     | 0.57    | 0.79  | -0.03 | 0.61  | 0.45 | -0.22 |   |
| 0.52      |            | 1.41       | 0.14  | 0.9     | 1.34  | 0.07  | 1.32  |      |       |   |
| GENE1761X | 15598_s_at | 15598_s_at | 1     | 0.23    | 1.04  | 0.34  | 0.27  | 0.39 | -0.55 |   |
| 0.38      |            | 1.17       | 0.36  | 0.33    | 0.79  | 0.09  | 1.09  |      |       |   |

|           |            |            |            |      |       |       |       |      |       |
|-----------|------------|------------|------------|------|-------|-------|-------|------|-------|
| GENE2467X | 15174_f_at | 15174_f_at | 1          | 0.05 | 0.46  | -0.03 | 0.39  | 0.41 | -0.04 |
|           | 0.25       | 1.09 0.71  | 0.37 0.91  | 0.85 | 0.43  |       |       |      |       |
| GENE2453X | 12262_at   | 12262_at   | 1          | 0.66 | 0.62  | 0     | 0.61  | 0.72 | 0.36  |
|           | 0.44       | 1.59 0.79  | 0.57 1.95  | 1.29 | 0.31  |       |       |      |       |
| GENE2449X | 16716_at   | 16716_at   | 1          | 0.17 | 0.66  | 0.28  | 0.2   | 0.61 | 0.39  |
|           | 1.15       | 1.93 1.16  | 0.88 1.78  | 1.14 | 0.36  |       |       |      |       |
| GENE2448X | 17935_at   | 17935_at   | 1          | 0.09 | 0.39  | 0.17  | 0.15  | 0.36 | 0.19  |
|           | 0.32       | 0.96 0.62  | 0.26 1.06  | 0.66 | 0.05  |       |       |      |       |
| GENE2174X | 14122_at   | 14122_at   | 1          | 0.4  | 0.18  | -0.04 | 0.5   | 1.41 | 0.51  |
|           | 1.42       | 1.95 0.44  | 0.63 2.63  | 1.16 | 0.73  |       |       |      |       |
| GENE2170X | 16321_at   | 16321_at   | 1          | 0.55 | 0.46  | 0.02  | -0.04 | 0.44 | 0.58  |
|           | 0.55       | 0.9 0.5    | -0.12 1.2  | 0.85 | 0.33  |       |       |      |       |
| GENE2455X | 16222_at   | 16222_at   | 1          | 2.33 | 2.72  | -0.26 | 1.6   | 3.37 | 0.73  |
|           | 2.86       | 4.29 2.58  | 2.11 3.94  | 2.77 | 0     |       |       |      |       |
| GENE2454X | 14646_s_at | 14646_s_at | 1          | 0.71 | 0.79  | 0.23  | 0.8   | 0.98 | 0.4   |
|           | 0.87       | 1.86 0.73  | 1.01 1.76  | 1.03 | -0.25 |       |       |      |       |
| GENE2452X | 14490_at   | 14490_at   | 1          | 0.72 | 1     | 0.62  | 0.55  | 1.07 | 0.77  |
|           | 1.35       | 2.14 1.41  | 1.05 2.03  | 1.72 | 0.74  |       |       |      |       |
| GENE2451X | 19644_at   | 19644_at   | 1          | 0.57 | 0.92  | 0.5   | 0.46  | 0.9  | 0.38  |
|           | 0.97       | 1.59 1.34  | 0.88 1.41  | 1.49 | 0.58  |       |       |      |       |
| GENE2450X | 14507_at   | 14507_at   | 1          | 0.34 | 0.89  | 0.43  | 0.42  | 0.69 | 0.49  |
|           | 0.55       | 1.41 0.97  | 0.59 1.3   | 1.03 | 0.17  |       |       |      |       |
| GENE2164X | 14988_at   | 14988_at   | 1          | 1.45 | 1.85  | 0.93  | 1.33  | 1.9  | 0     |
|           | 1.91       | 3.06 1.86  | 1.33 2.32  | 1.62 | 1.13  |       |       |      |       |
| GENE2163X | 19384_at   | 19384_at   | 1          | 0.49 | 1.24  | 0.57  | 0.37  | 0.92 | -0.09 |
|           | 1.03       | 2.09 1.16  | 0.57 1.5   | 0.76 | 0.43  |       |       |      |       |
| GENE2125X | 18022_at   | 18022_at   | 1          | 1    | 2.07  | 1.53  | 1.13  | 1.86 | 1.58  |
|           | 1.59       | 2.54 1.36  | 1.18 2.6   | 1.65 | 0.72  |       |       |      |       |
| GENE2124X | 12562_at   | 12562_at   | 1          | 0.75 | 1.25  | 1.05  | 0.83  | 1.05 | 1.09  |
|           | 0.78       | 1.85 0.85  | 0.35 1.72  | 1.2  | -0.02 |       |       |      |       |
| GENE2123X | 19865_g_at | 19865_g_at | 1          | 0.93 | 0.98  | 0.73  | 0.61  | 0.9  | 0.56  |
|           | 0.61       | 1.07 0.62  | 0.55 1.09  | 0.65 | 0.34  |       |       |      |       |
| GENE2295X | 18012_s_at | 18012_s_at | 1          | 1.09 | 2.32  | 0.89  | 1.04  | 2.92 | 1.18  |
|           | 1.82       | 3.76 1.64  | 2.04 3.76  | 1.73 | 1.77  |       |       |      |       |
| GENE2294X | 14884_at   | 14884_at   | 1          | 1    | 1.91  | 0.43  | 0.75  | 2.08 | 0.62  |
|           | 1.38       | 3.2 1.23   | 0.82 3.19  | 1.68 | 1.05  |       |       |      |       |
| GENE2293X | 15795_g_at | 15795_g_at | 1          | 0.8  | 1.55  | 0.29  | 0.75  | 1.24 | 0.41  |
|           | 0.45       | 2.12 0.73  | 0.8 2.27   | 0.68 | 0.79  |       |       |      |       |
| GENE2292X | 17964_at   | 17964_at   | 1          | 0.35 | 1.28  | 0.21  | 0.39  | 1.39 | 0.39  |
|           | 0.29       | 2.05 0.3   | 0.59 1.9   | 0.58 | 0.79  |       |       |      |       |
| GENE2291X | 19130_at   | 19130_at   | 1          | 0.45 | 1.34  | 0.8   | 0.38  | 1.3  | 0.39  |
|           | 0.34       | 1.57 0.79  | 0.37 1.5   | 0.56 | 0.35  |       |       |      |       |
| GENE2290X | 14886_at   | 14886_at   | 1          | 0.32 | 0.72  | 0.47  | 0.1   | 0.84 | 0.47  |
|           | 0.46       | 1.56 0.57  | 0.32 1.43  | 0.47 | 0.16  |       |       |      |       |
| GENE2286X | 13069_at   | 13069_at   | 1          | 0.48 | 1.23  | 0.22  | 0.17  | 1.22 | 0.49  |
|           | 0.31       | 1.95 0.82  | 0.08 1.95  | 1.32 | 0.28  |       |       |      |       |
| GENE2285X | 18286_at   | 18286_at   | 1          | 0.28 | 0.78  | 0.21  | 0.12  | 0.92 | 0.3   |
|           | 0.19       | 1.08 0.41  | 0.06 1.08  | 0.57 | 0.46  |       |       |      |       |
| GENE2282X | 15188_s_at | 15188_s_at | 1          | 0.43 | 1.28  | 0.21  | -0.19 | 1.93 | 0.33  |
|           | 0.5        | 2.67 1.34  | 0.47 2.9   | 1.32 | 0.97  |       |       |      |       |
| GENE2281X | 15782_at   | 15782_at   | 1          | 0.25 | 0.64  | 0.14  | -0.08 | 1.04 | 0.28  |
|           | 0.5        | 1.6 0.58   | 0.03 1.7   | 0.7  | 0.41  |       |       |      |       |
| GENE2278X | 12511_g_at | 12511_g_at | 1          | 0.23 | 0.61  | 0.18  | 0.07  | 1.13 | 0.31  |
|           | 0.15       | 1.11 0.41  | -0.08 1.39 | 1.05 | 0.1   |       |       |      |       |
| GENE2277X | 16303_at   | 16303_at   | 1          | 0.3  | 0.77  | 0.32  | 0.07  | 1.23 | 0.48  |
|           | 0.26       | 0.97 0.23  | 0.02 1.02  | 0.6  | 0.26  |       |       |      |       |

|           |            |            |       |       |       |       |         |      |       |   |  |
|-----------|------------|------------|-------|-------|-------|-------|---------|------|-------|---|--|
| GENE2276X | 15376_at   | 15376_at   | 1     | -0.28 | 0.75  | 0.54  | 0.23    | 0.77 | 0.6   |   |  |
| 0.49      | 1.73       | 0.79       | 0     | 1.8   | 0.46  | 0.33  |         |      |       |   |  |
| GENE2275X | 12666_at   | 12666_at   | 1     | -0.14 | 0.55  | 0.3   | 0.29    | 0.11 | 0.29  |   |  |
| 0.21      | 1.01       | 0          | 0.06  | 1     | 0.26  | 0.31  |         |      |       |   |  |
| GENE2280X | 16929_at   | 16929_at   | 1     | 0.13  | 0.85  | 0.15  | 0.28    | 0.88 | -0.17 |   |  |
| 0.13      | 1.65       | 0.56       | 0.02  | 1.51  | 0.54  | 0.04  |         |      |       |   |  |
| GENE2279X | 18954_at   | 18954_at   | 1     | 0.35  | 1.09  | -0.01 | 0.00942 |      | 1.06  |   |  |
| 0.24      | 0.22       | 1.17       | 0.48  | 0.01  | 1.26  | 0.59  | -0.2    |      |       |   |  |
| GENE2231X | 16055_s_at | 16055_s_at | 1     | 0.84  | 1.82  | 0.9   | 0.41    | 0.95 | -0.04 |   |  |
| 0.32      | 2.15       | 0.5        | -0.06 | 1.97  | 0.71  | -0.76 |         |      |       |   |  |
| GENE2162X | 12167_at   | 12167_at   | 1     | 1.02  | 1.34  | 1.02  | 0.82    | 0.75 | 0.44  |   |  |
| 0.93      | 2.01       | 1.33       | 0.42  | 1.36  | 1.21  | 0.74  |         |      |       |   |  |
| GENE2161X | 16532_at   | 16532_at   | 1     | 0.52  | 0.93  | 0.45  | 0.39    | 0.58 | 0.26  |   |  |
| 0.4       | 1.03       | 0.54       | 0.21  | 0.85  | 0.41  | 0.46  |         |      |       |   |  |
| GENE2160X | 20611_at   | 20611_at   | 1     | 0.55  | 0.74  | 0.29  | 0.43    | 0.46 | 0.05  |   |  |
| 0.18      | 1.25       | 0.57       | 0.05  | 0.95  | 0.53  | 0.63  |         |      |       |   |  |
| GENE2289X | 14423_at   | 14423_at   | 1     | 0.47  | 1.52  | 1.24  | 0.38    | 1.62 | 1.27  |   |  |
| 1.35      | 3.09       | 2.2        | 0.89  | 2.89  | 2.17  | 0.96  |         |      |       |   |  |
| GENE2288X | 15001_at   | 15001_at   | 1     | 0.47  | 1     | 0.8   | 0.33    | 1.27 | 0.92  |   |  |
| 0.52      | 1.79       | 1.23       | 0.28  | 1.61  | 1.1   | 0.43  |         |      |       |   |  |
| GENE1876X | 14663_s_at | 14663_s_at | 1     | 0.9   | 2     | 2.23  | 0.22    | 2.2  | 1.05  |   |  |
| 0.66      | 3          | 2.47       | 0.66  | 2.83  | 2.56  | 1.58  |         |      |       |   |  |
| GENE1875X | 13117_at   | 13117_at   | 1     | 0.52  | 1.03  | 0.77  | -0.01   | 0.69 | 0.15  |   |  |
| 0.47      | 1.38       | 1.17       | 0.11  | 1.07  | 0.89  | 0.23  |         |      |       |   |  |
| GENE1877X | 15612_s_at | 15612_s_at | 1     | 0.2   | 1.52  | 1.24  | 0.3     | 0.88 | 0.47  |   |  |
| 0.81      | 2.31       | 1.21       | 0.83  | 1.62  | 0.66  | 0.84  |         |      |       |   |  |
| GENE1873X | 14477_at   | 14477_at   | 1     | 0.14  | 0.57  | 0.7   | -0.06   | 0.4  | 0.14  |   |  |
| 0.15      | 1.15       | 0.65       | 0.17  | 0.87  | 0.39  | 0.31  |         |      |       |   |  |
| GENE1872X | 16538_at   | 16538_at   | 1     | 1.07  | 1.73  | 2.01  | 0.88    | 0.74 | 0.97  |   |  |
| 1.15      | 2.26       | 2.1        | 0.85  | 1.75  | 1.49  | 0.79  |         |      |       |   |  |
| GENE1871X | 18898_s_at | 18898_s_at | 1     | 0.55  | 1.37  | 1.23  | 0.37    | 0.56 | 0.47  |   |  |
| 0.5       | 1.27       | 1.12       | 0.32  | 0.82  | 0.67  | 0.47  |         |      |       |   |  |
| GENE1870X | 12136_at   | 12136_at   | 1     | 0.83  | 1.47  | 1.52  | 0.39    | 0.75 | 0.7   |   |  |
| 0.69      | 1.15       | 1.03       | 0.57  | 1.09  | 0.73  | 1.04  |         |      |       |   |  |
| GENE1869X | 18315_s_at | 18315_s_at | 1     | 0.44  | 1.24  | 1.35  | 0.34    | 0.77 | 0.93  |   |  |
| 0.23      | 1.44       | 1.21       | -0.1  | 0.97  | 1.11  | 0.97  |         |      |       |   |  |
| GENE1868X | 19149_at   | 19149_at   | 1     | 0.25  | 0.6   | 0.76  | 0.26    | 0.48 | 0.57  |   |  |
| 0.28      | 1.04       | 0.62       | 0.02  | 0.81  | 0.61  | 0.28  |         |      |       |   |  |
| GENE1867X | 16744_at   | 16744_at   | 1     | 0.25  | 0.88  | 1.35  | -0.11   | 0.45 | 0.16  | - |  |
| 0.24      | 1.61       | 0.64       | -0.37 | 1.33  | -0.54 | 0.31  |         |      |       |   |  |
| GENE1866X | 17896_at   | 17896_at   | 1     | 0.31  | 0.51  | 0.57  | -0.12   | 0.01 | 0.04  |   |  |
| 0.01      | 1.2        | 0.84       | -0.33 | 0.54  | 0.15  | 0.63  |         |      |       |   |  |
| GENE2242X | 17467_at   | 17467_at   | 1     | -0.15 | 1.08  | 0     | -0.47   | 1.43 | 0.57  | - |  |
| 0.38      | 1.01       | -0.22      | -0.31 | 1.18  | -0.13 | 0.03  |         |      |       |   |  |
| GENE2241X | 18411_at   | 18411_at   | 1     | -0.2  | 0.59  | 0.06  | -0.21   | 0.96 | -0.23 | - |  |
| 0.5       | 1.13       | -0.5       | -0.16 | 1.02  | -0.26 | 0.3   |         |      |       |   |  |
| GENE2240X | 18978_at   | 18978_at   | 1     | -0.34 | 0.66  | 0.56  | -0.42   | 0.81 | -0.32 | - |  |
| 0.36      | 1.07       | 0.69       | -0.51 | 1.06  | -0.09 | -0.06 |         |      |       |   |  |
| GENE2239X | 12592_at   | 12592_at   | 1     | -0.02 | 0.61  | 0.42  | -0.29   | 0.75 | -0.2  | - |  |
| 0.19      | 1.01       | 0.16       | -0.09 | 0.92  | 0.02  | 0.13  |         |      |       |   |  |
| GENE2238X | 15241_s_at | 15241_s_at | 1     | 0.35  | 1.07  | 0.26  | -0.27   | 0.8  | 0.36  | - |  |
| 0.85      | 1.21       | 0.19       | -0.39 | 1.17  | -0.12 | -0.1  |         |      |       |   |  |
| GENE2237X | 15536_at   | 15536_at   | 1     | 0.2   | 0.87  | 0.42  | -0.36   | 0.61 | -0.02 | - |  |
| 0.79      | 1.22       | 0.45       | -0.23 | 0.67  | 0.14  | 0.38  |         |      |       |   |  |
| GENE2236X | 15473_at   | 15473_at   | 1     | 0.08  | 0.48  | 0.26  | -0.11   | 0.67 | 0.23  | - |  |
| 0.26      | 1.13       | 0.27       | -0.06 | 0.62  | 0.26  | -0.02 |         |      |       |   |  |

|           |            |            |            |         |         |         |         |       |       |   |  |
|-----------|------------|------------|------------|---------|---------|---------|---------|-------|-------|---|--|
| GENE2227X | 20566_s_at | 20566_s_at | 1          | 0.51    | 1.54    | 0.7     | 0.29    | 1.03  | -0.2  |   |  |
|           | 0.16       | 1.11 0.27  | -0.22 0.5  | -0.37   | 0.04    |         |         |       |       |   |  |
| GENE2230X | 14434_at   | 14434_at   | 1          | 0.35    | 1.42    | 0.63    | 0.33    | 1.12  | -0.3  |   |  |
|           | 0.11       | 1.75 0.36  | -0.08 1.37 | -0.02   | 0.28    |         |         |       |       |   |  |
| GENE2229X | 20614_s_at | 20614_s_at | 1          | 0.48    | 1.02    | 0.38    | 0.4     | 1.14  | 0.14  |   |  |
|           | 0.24       | 1.31 0.1   | 0.19 1.16  | 0.03    | -0.02   |         |         |       |       |   |  |
| GENE2217X | 15482_at   | 15482_at   | 1          | 0.76    | 1.7     | 0.39    | 0.68    | 1.79  | 0.35  |   |  |
|           | 0.54       | 1.34 0.35  | 0.54 1.26  | -0.41   | 0.39    |         |         |       |       |   |  |
| GENE1763X | 13895_at   | 13895_at   | 1          | 0.09    | 1.95    | 0.27    | 0.09    | 1.81  | 0.07  | 0 |  |
|           | 1.45       | -0.45 0.09 | 1 -0.42    | 1.77    |         |         |         |       |       |   |  |
| GENE1762X | 16627_s_at | 16627_s_at | 1          | -0.02   | 1.01    | 0.58    | 0.00222 |       | 0.52  | - |  |
| 0.00876   |            | -0.1 0.37  | 0.06 0.13  | 0.56    | 0.00523 | 0.61    |         |       |       |   |  |
| GENE2333X | 20570_at   | 20570_at   | 1          | -0.32   | -0.37   | -0.28   | 0.26    | -0.37 | -0.55 | - |  |
| 0.32      | 1.34       | 1.54 0     | 1.15 1.62  | 0.28    |         |         |         |       |       |   |  |
| GENE2332X | 20138_at   | 20138_at   | 1          | -0.31   | -0.43   | 0.01    | -0.01   | -0.39 | -0.15 | - |  |
| 0.11      | 1.18       | 1.09 -0.39 | 0.82 0.83  | -0.13   |         |         |         |       |       |   |  |
| GENE2330X | 14628_r_at | 14628_r_at | 1          | -0.08   | -0.08   | -0.67   | -0.07   | 0.03  | -0.03 | - |  |
| 0.4       | 0.99       | 0.75 0     | 1.04 1.26  | -0.18   |         |         |         |       |       |   |  |
| GENE2318X | 13277_i_at | 13277_i_at | 1          | -0.5    | -0.26   | 0.28    | -0.52   | 0.73  | 1.15  |   |  |
|           | 0.33       | 3.23 2.6   | -0.82 2.98 | 2.58    | 1.54    |         |         |       |       |   |  |
| GENE2317X | 15673_at   | 15673_at   | 1          | -0.12   | -0.04   | 0.51    | -0.25   | 0.06  | 0.74  | - |  |
| 0.03      | 1.2        | 1.41 -0.23 | 1.44 1.41  | 0.85    |         |         |         |       |       |   |  |
| GENE2316X | 13110_at   | 13110_at   | 1          | -0.7    | 0.38    | 0.49    | -0.42   | 0.38  | 0.12  | - |  |
| 0.58      | 1.95       | 1.64 -0.15 | 1.92 1.62  | 1       |         |         |         |       |       |   |  |
| GENE2315X | 15667_s_at | 15667_s_at | 1          | -0.27   | 0.07    | 0.31    | -0.32   | 0.01  | 0.06  | - |  |
| 0.26      | 0.81       | 1.12 -0.09 | 0.99 1.21  | 0.77    |         |         |         |       |       |   |  |
| GENE2314X | 17698_at   | 17698_at   | 1          | -1      | 0.06    | 0.53    | -0.58   | 0.66  | 1.29  | - |  |
| 0.41      | 1.21       | 1.8 -0.41  | 1.69 1.71  | 0.48    |         |         |         |       |       |   |  |
| GENE2313X | 15025_at   | 15025_at   | 1          | -0.26   | 0.16    | 0.95    | -0.56   | 0.32  | 1.04  | - |  |
| 0.56      | 1.27       | 1.85 0.15  | 1.53 1.71  | 1.01    |         |         |         |       |       |   |  |
| GENE2312X | 12623_at   | 12623_at   | 1          | -0.36   | 0.29    | 0.83    | 0.14    | 0.35  | 0.93  | - |  |
| 0.36      | 1.5        | 1.87 0.14  | 1.76 1.91  | 0.65    |         |         |         |       |       |   |  |
| GENE2311X | 13104_s_at | 13104_s_at | 1          | -0.12   | 0.41    | 0.8     | -0.17   | 0.42  | 0.85  | - |  |
| 0.2       | 1.1        | 1.52 -0.24 | 1.3 1.57   | 0.7     |         |         |         |       |       |   |  |
| GENE2310X | 12297_at   | 12297_at   | 1          | -0.32   | -0.07   | 0.29    | -0.42   | -0.09 | 0.44  | - |  |
| 0.53      | 1.37       | 1.67 -0.61 | 1.57 1.98  | 0.17    |         |         |         |       |       |   |  |
| GENE2309X | 18572_at   | 18572_at   | 1          | -0.2    | -0.16   | 0.1     | -0.23   | -0.01 | 0.32  | - |  |
| 0.25      | 0.43       | 0.89 -0.19 | 0.79 1.02  | 0.23    |         |         |         |       |       |   |  |
| GENE1639X | 17109_s_at | 17109_s_at | 1          | -0.56   | -0.18   | 0.26    | -0.76   | -0.26 | 0.43  | - |  |
| 0.8       | 0.45       | 1.47 -0.8  | 0.51 1.51  | 0.17    |         |         |         |       |       |   |  |
| GENE1638X | 14701_s_at | 14701_s_at | 1          | -0.26   | 0.06    | -0.09   | -0.18   | 0.13  | 0.54  | - |  |
| 0.32      | 0.3        | 0.54 -0.43 | 0.39 1.01  | 0.13    |         |         |         |       |       |   |  |
| GENE1985X | 14780_at   | 14780_at   | 1          | 0       | -0.48   | 1.13    | 0.84    | 0.19  | 1.37  | 0 |  |
|           | 3.25       | 3.88 0.26  | 3.36 3.58  | 3.05    |         |         |         |       |       |   |  |
| GENE1984X | 19451_at   | 19451_at   | 1          | 0.26    | 0       | 3.88    | 0.48    | 0.26  | 3     |   |  |
|           | 1.48       | 4.97 7     | 0 4.64     | 7.32    | 6.2     |         |         |       |       |   |  |
| GENE1983X | 16701_at   | 16701_at   | 1          | 0       | 0.84    | 2.26    | 0       | 0.48  | 1.92  | 0 |  |
|           | 3.56       | 4.75 0     | 3.88 5.17  | 2.84    |         |         |         |       |       |   |  |
| GENE1982X | 13605_at   | 13605_at   | 1          | 0.00952 |         | 0.00342 |         | 0.56  | 0.03  |   |  |
|           | 0.18       | 1 -0.01    | 1.01 1.54  | 0.11    | 1.08    | 1.58    | 1.04    |       |       |   |  |
| GENE1981X | 17121_s_at | 17121_s_at | 1          | 0       | 0       | 0.48    | 0.84    | 0     | 1.58  | 0 |  |
|           | 1.84       | 2.96 0.26  | 2.2 4.1    | 2       |         |         |         |       |       |   |  |
| GENE1980X | 16591_s_at | 16591_s_at | 1          | 0.06    | -0.17   | 0.33    | 0.2     | -0.2  | 0.62  |   |  |
|           | 0.14       | 0.63 1.31  | 0.24 0.81  | 1.27    | 0.65    |         |         |       |       |   |  |
| GENE1979X | 19803_s_at | 19803_s_at | 1          | 0       | 0       | 1.37    | 0       | 0     | 1     | 0 |  |
|           | 2.07       | 3.74 0     | 1.67 4.35  | 1.76    |         |         |         |       |       |   |  |

|           |            |            |            |       |           |       |       |       |       |   |
|-----------|------------|------------|------------|-------|-----------|-------|-------|-------|-------|---|
| GENE1978X | 15839_at   | 15839_at   | 1          | 0     | 0         | 1.13  | 0     | 0     | 0     | 0 |
|           | 2.32       | 2.53 0.84  | 1.67 3.37  | 1.37  |           |       |       |       |       |   |
| GENE1977X | 17291_at   | 17291_at   | 1          | -0.36 | -0.84     | 0.76  | -0.36 | 0.41  | 0.26  |   |
|           | 0.15       | 1.83 2.56  | -0.16 1.47 | 2.65  | 1.83      |       |       |       |       |   |
| GENE1976X | 16603_s_at | 16603_s_at | 1          | 0.35  | 0.17      | 0.73  | -0.17 | 0     | 0.82  | - |
|           | 0.28 0.77  | 1.64 -0.17 | 1.47 2.88  | 1.17  |           |       |       |       |       |   |
| GENE1975X | 16354_at   | 16354_at   | 1          | 0     | 0.13      | 2.32  | 0.36  | -0.32 | 2     |   |
|           | 0.36       | 2.03 3.56  | 0 1.43     | 3.37  | 0.62      |       |       |       |       |   |
| GENE1974X | 13449_at   | 13449_at   | 1          | 0     | 0         | 1.76  | 0     | 0     | 1     | 0 |
|           | 1.26       | 3.7 0      | 1.13 3.37  | 0     |           |       |       |       |       |   |
| GENE1973X | 13126_g_at | 13126_g_at | 1          | 0.05  | -0.11     | 0.38  | 0.16  | -0.04 | 0.47  |   |
|           | 0.17       | 0.69 1.3   | 0.23 0.92  | 1.23  | -0.06     |       |       |       |       |   |
| GENE1972X | 15410_at   | 15410_at   | 1          | 0.22  | 0.00791   |       | 0.31  | 0.16  | -0.04 |   |
|           | 0.48       | 0.16 0.4   | 1.12 0.16  | 0.55  | 1.31 0.03 |       |       |       |       |   |
| GENE1936X | 13493_at   | 13493_at   | 1          | -0.4  | 0.15      | 1.03  | -0.51 | 0.17  | 0.78  | - |
|           | 0.59 1.33  | 2.06 -0.2  | 1.05 1.71  | 0.19  |           |       |       |       |       |   |
| GENE1935X | 15497_at   | 15497_at   | 1          | -0.19 | 0.24      | 1.56  | -0.22 | 0.36  | 1.43  | - |
|           | 0.32 1.04  | 2.35 -0.46 | 0.74 2.19  | 0.5   |           |       |       |       |       |   |
| GENE1934X | 14721_s_at | 14721_s_at | 1          | -0.08 | 0.08      | 0.67  | -0.58 | -0.1  | 0.61  |   |
|           | 0.07       | 0.46 0.93  | 0.04 0.55  | 1     | 0.4       |       |       |       |       |   |
| GENE1933X | 13612_at   | 13612_at   | 1          | -0.31 | 0.26      | 1.13  | -0.18 | -0.01 | 0.81  | - |
|           | 0.25 0.46  | 1.48 0.12  | 0.4 0.67   | 0.41  |           |       |       |       |       |   |
| GENE1932X | 16144_s_at | 16144_s_at | 1          | -0.31 | 0.45      | 1.86  | -0.19 | -0.15 | 1.38  | - |
|           | 0.67 0.94  | 1.97 -0.17 | 0.34 1.39  | 0.68  |           |       |       |       |       |   |
| GENE1749X | 16346_at   | 16346_at   | 1          | 0     | 0         | 0     | 0     | 0     | 0     | 0 |
|           | 0.84       | 3.67 0     | 0.26 3.45  | 3.07  |           |       |       |       |       |   |
| GENE1748X | 17588_s_at | 17588_s_at | 1          | 0     | 0         | 1     | 0     | 0     | -0.26 |   |
|           | 0.26       | 0.84 3.22  | 0 0        | 2     | 1.41      |       |       |       |       |   |
| GENE1644X | 15107_s_at | 15107_s_at | 1          | 0.84  | -2.48     | 1.07  | -2.53 | -2.48 | 0.39  |   |
|           | 0.72       | 0.55 2.32  | -2.53 1.34 | 2.19  | 0         |       |       |       |       |   |
| GENE1643X | 17583_s_at | 17583_s_at | 1          | -0.87 | -0.67     | 0.97  | -0.56 | -0.97 | 0.29  | - |
|           | 0.76 1.03  | 1.27 -0.56 | 0.74 1.1   | -1.42 |           |       |       |       |       |   |
| GENE1637X | 17400_s_at | 17400_s_at | 1          | -0.2  | -0.48     | -0.17 | 0     | -0.01 | 1.09  | - |
|           | 0.33 -0.43 | 0.45 -0.14 | 0.3 1.15   | 0.09  |           |       |       |       |       |   |
| GENE1636X | 19457_at   | 19457_at   | 1          | 0.04  | -0.23     | 0.68  | -0.25 | 0.28  | 1.05  | - |
|           | 0.18 -0.23 | 0.76 -0.57 | 0.25 1.48  | 0.18  |           |       |       |       |       |   |
| GENE1635X | 12151_at   | 12151_at   | 1          | 0.33  | -0.27     | 0.28  | 0.05  | -0.29 | 0.42  | - |
|           | 0.19 -0.14 | 0.58 0.15  | -0.02 1.05 | 0.31  |           |       |       |       |       |   |
| GENE1634X | 16637_s_at | 16637_s_at | 1          | 0     | 0         | 0     | 0     | 0     | 0     | 0 |
|           | 0          | 0 0        | 0 4.03     | 0     |           |       |       |       |       |   |
| GENE2044X | 15669_s_at | 15669_s_at | 1          | 0.42  | 2.8       | 3.05  | 0.01  | 2.63  | 2.81  |   |
|           | 0.26       | 3.12 3.17  | 0.28 2.48  | 2.53  | 2.39      |       |       |       |       |   |
| GENE2043X | 19646_at   | 19646_at   | 1          | -0.23 | 3         | 3.73  | 0.11  | 3     | 3.58  | - |
|           | 0.42 3.42  | 3.55 -0.12 | 2.54 3.08  | 2.25  |           |       |       |       |       |   |
| GENE2042X | 16115_at   | 16115_at   | 1          | 0.31  | 2.88      | 3.62  | 0.03  | 2.8   | 3.56  |   |
|           | 0.14       | 3.37 3.68  | -0.25 2.07 | 3.2   | 2.32      |       |       |       |       |   |
| GENE2041X | 19762_at   | 19762_at   | 1          | 0.81  | 3.63      | 4.13  | 0.36  | 2.53  | 4.26  | - |
|           | 0.07 4.08  | 5 1        | 2.32 4.44  | 3.63  |           |       |       |       |       |   |
| GENE2040X | 16092_s_at | 16092_s_at | 1          | 0.13  | 1.19      | 1.65  | -0.58 | 0.7   | 1.09  | - |
|           | 0.26 1.58  | 1.69 -0.2  | 1.14 1.4   | 1.14  |           |       |       |       |       |   |
| GENE2039X | 18278_at   | 18278_at   | 1          | 0.13  | 0.82      | 1.09  | 0.13  | 0.73  | 1.05  | - |
|           | 0.01 0.91  | 1.2 -0.26  | 0.85 1.24  | 0.33  |           |       |       |       |       |   |
| GENE2038X | 12698_at   | 12698_at   | 1          | -0.42 | 1.43      | 2.65  | -0.12 | 0.54  | 1.77  | - |
|           | 0.66 2.73  | 3.43 -0.24 | 2.18 3.62  | 2.8   |           |       |       |       |       |   |
| GENE2037X | 19405_at   | 19405_at   | 1          | -0.14 | 0.56      | 1.56  | -0.04 | 0.72  | 1.52  | - |
|           | 0.06 1.46  | 1.69 -0.32 | 1.52 2.24  | 1.5   |           |       |       |       |       |   |

|           |            |            |      |          |      |      |       |      |      |   |
|-----------|------------|------------|------|----------|------|------|-------|------|------|---|
| GENE2036X | 13467_at   | 13467_at   | 1    | -0.5     | 2.12 | 4.26 | -1.37 | 1.93 | 3.78 | - |
|           | 1.2        | 2.67       | 4.65 | -1.97    | 2.3  | 4.68 | 3.84  |      |      |   |
| GENE2035X | 12966_s_at | 12966_s_at | 1    | -0.49    | 0.94 | 1.96 | -0.64 | 0.85 | 1.22 | - |
|           | 0.42       | 1.48       | 1.61 | -0.56    | 1.58 | 1.7  | 1.65  |      |      |   |
| GENE1887X | 18753_s_at | 18753_s_at | 1    | 0        | 2.6  | 3.23 | 1.35  | 1.24 | 1.77 | - |
|           | 0.84       | 1.67       | 1.89 | 0        | 2.6  | 2.45 | 3.24  |      |      |   |
| GENE1886X | 20591_at   | 20591_at   | 1    | 0.34     | 2.2  | 1.66 | -0.79 | 1.92 | 1.5  | - |
|           | 0.4        | 1.92       | 1.36 | 0.24     | 1.92 | 0.87 | 2.11  |      |      |   |
| GENE1885X | 15792_at   | 15792_at   | 1    | 0.21     | 2.19 | 3    | -0.27 | 1.82 | 1.73 |   |
|           | 0.15       | 2.01       | 1.79 | -0.02    | 1.37 | 0.92 | 3.3   |      |      |   |
| GENE2034X | 15154_at   | 15154_at   | 1    | -0.94    | 2.2  | 2.64 | -0.65 | 0.48 | 0.8  |   |
|           | 0.01       | 1.37       | 3.65 | 0.18     | 1.58 | 3.78 | 2.8   |      |      |   |
| GENE2033X | 15531_i_at | 15531_i_at | 1    | 0        | 1.13 | 4.3  | 0     | 0    | 2.53 | 0 |
|           | 1.92       | 4.23       | 0    | 1.67     | 4.23 | 5.55 |       |      |      |   |
| GENE2032X | 15524_at   | 15524_at   | 1    | 0        | 1    | 3    | 0     | 0.48 | 1.84 | 0 |
|           | 1.37       | 2.92       | 0.67 | 0.84     | 2.48 | 3.4  |       |      |      |   |
| GENE2031X | 16594_at   | 16594_at   | 1    | 0.1      | 0.69 | 1.76 | -0.29 | 0.18 | 1.22 | - |
|           | 0.21       | 1.14       | 1.93 | -0.4     | 0.69 | 1.74 | 1.92  |      |      |   |
| GENE2011X | 15005_s_at | 15005_s_at | 1    | -0.19    | 1.8  | 3.29 | -0.19 | 1.8  | 2.13 |   |
|           | 1.12       | 2.39       | 4.01 | -0.19    | 1.9  | 3.6  | 2.8   |      |      |   |
| GENE2010X | 17860_at   | 17860_at   | 1    | 0        | 1.9  | 3.94 | 0.74  | 1.79 | 3.67 |   |
|           | 0.51       | 1.78       | 3.73 | 0.49     | 1.69 | 3.49 | 3.62  |      |      |   |
| GENE2009X | 15625_at   | 15625_at   | 1    | -0.09    | 1.3  | 1.91 | -0.11 | 1.34 | 1.93 |   |
|           | 0.13       | 1.3        | 1.93 | -0.00998 | 0.95 | 1.67 | 1.94  |      |      |   |
| GENE2008X | 14854_at   | 14854_at   | 1    | -0.67    | 1.36 | 1.96 | 0.45  | 1.22 | 2.21 |   |
|           | 0.58       | 0.87       | 1.44 | 0.32     | 1.41 | 1.89 | 2.19  |      |      |   |
| GENE2007X | 16526_at   | 16526_at   | 1    | -0.05    | 0.77 | 1.72 | -0.05 | 0.71 | 1.78 |   |
|           | 0.03       | 1.21       | 2.16 | 0.26     | 1.6  | 2.58 | 2.21  |      |      |   |
| GENE2006X | 17104_s_at | 17104_s_at | 1    | -0.02    | 0.93 | 1.92 | -0.15 | 0.88 | 2.26 |   |
|           | 0.11       | 1.06       | 2.37 | 0.14     | 1.39 | 2.66 | 2.4   |      |      |   |
| GENE2005X | 18109_s_at | 18109_s_at | 1    | 0.17     | 1.02 | 1.79 | 0.23  | 1.36 | 2.49 |   |
|           | 0.14       | 1.2        | 2.63 | 0.1      | 1.39 | 2.63 | 2.7   |      |      |   |
| GENE2004X | 20096_at   | 20096_at   | 1    | 0.22     | 1.25 | 2.25 | -0.07 | 1.95 | 3.09 |   |
|           | 0.18       | 0.87       | 2.95 | 0.5      | 1.25 | 2.99 | 3.57  |      |      |   |
| GENE2003X | 12797_s_at | 12797_s_at | 1    | -0.01    | 0.95 | 1.28 | -0.12 | 0.94 | 1.21 |   |
|           | 0.07       | 0.84       | 1.55 | 0.11     | 1.11 | 1.74 | 2.52  |      |      |   |
| GENE1734X | 16510_at   | 16510_at   | 1    | -1.67    | 1.76 | 2.61 | -1.67 | 2.13 | 1.26 | - |
|           | 1.67       | 2          | 2.82 | -1.67    | 2.63 | 2.55 | 3.71  |      |      |   |
| GENE1733X | 13803_at   | 13803_at   | 1    | -1.67    | 2.32 | 3.34 | -1.41 | 2.53 | 1.84 | - |
|           | 1.67       | 2.37       | 3.42 | -1.67    | 1.26 | 2.39 | 4.49  |      |      |   |
| GENE1732X | 20179_at   | 20179_at   | 1    | 0        | 0.33 | 0.91 | -0.46 | 0.53 | 0.91 | - |
|           | 0.51       | 0.85       | 1.29 | -0.27    | 0.79 | 0.82 | 1.49  |      |      |   |
| GENE1731X | 17857_at   | 17857_at   | 1    | -0.07    | 0.25 | 0.7  | -0.23 | 0.28 | 0.54 | - |
|           | 0.3        | 0.35       | 0.58 | -0.25    | 0.26 | 0.57 | 1.12  |      |      |   |
| GENE1730X | 13918_at   | 13918_at   | 1    | -0.2     | 0.93 | 1.04 | -0.54 | 1.21 | 1.16 | - |
|           | 0.16       | 1.29       | 1.1  | -0.34    | 0.89 | 0.97 | 1.65  |      |      |   |
| GENE1729X | 12645_at   | 12645_at   | 1    | -0.29    | 0.7  | 0.82 | -0.42 | 1.09 | 1.45 | - |
|           | 0.51       | 0.69       | 0.94 | -0.28    | 0.84 | 1.2  | 1.21  |      |      |   |
| GENE1860X | 20390_s_at | 20390_s_at | 1    | -0.16    | 1.45 | 1.37 | -0.23 | 1.22 | 1.1  | - |
|           | 0.43       | 2.76       | 1.76 | -0.16    | 1.87 | 1.49 | 0.85  |      |      |   |
| GENE1859X | 17657_at   | 17657_at   | 1    | -0.41    | 0.64 | 1.19 | -0.79 | 1.19 | 0.69 |   |
|           | 0.23       | 2.21       | 1.39 | 0.26     | 1.81 | 1.32 | 0.82  |      |      |   |
| GENE1858X | 13330_at   | 13330_at   | 1    | -0.41    | 0.45 | 0.88 | -0.33 | 0.74 | 0.45 | - |
|           | 0.26       | 1.02       | 0.97 | -0.33    | 1.01 | 0.32 | 0.12  |      |      |   |
| GENE1857X | 14872_at   | 14872_at   | 1    | -0.29    | 0.23 | 0.92 | -0.6  | 0.28 | 0.65 | - |
|           | 0.41       | 1.49       | 1    | -0.75    | 1.25 | 1.07 | 0.43  |      |      |   |



|           |            |            |       |       |       |       |       |       |      |   |
|-----------|------------|------------|-------|-------|-------|-------|-------|-------|------|---|
| GENE1856X | 17096_s_at | 17096_s_at | 1     | -0.75 | 0.4   | 0.88  | -0.66 | 0.4   | 0.32 | - |
| 0.8       | 1.34       | 1.43       | -0.42 | 1.05  | 1.41  | 0.36  |       |       |      |   |
| GENE1855X | 18243_at   | 18243_at   | 1     | -0.28 | 0.47  | 0.89  | -0.3  | 0.5   | 0.45 | - |
| 0.5       | 0.74       | 1.05       | -0.17 | 0.68  | 0.95  | 0.4   |       |       |      |   |
| GENE1854X | 19936_at   | 19936_at   | 1     | 0.18  | 3     | 3.56  | -2.05 | 2.37  | 1.76 | - |
| 0.33      | 3.74       | 2.58       | -2.53 | 3.03  | 1.67  | 2.2   |       |       |      |   |
| GENE1853X | 20357_at   | 20357_at   | 1     | 0.11  | 0.63  | 0.85  | -0.35 | 0.58  | 0.28 | - |
| 0.4       | 1.37       | 0.8        | -0.5  | 0.67  | 0.16  | 0.38  |       |       |      |   |
| GENE1852X | 20264_at   | 20264_at   | 1     | -0.22 | 1.17  | 0.54  | 0.03  | 0.81  | 0.27 | - |
| 0.17      | 1.01       | 0.53       | -0.64 | 0.6   | 0.6   | 0.23  |       |       |      |   |
| GENE1851X | 16566_s_at | 16566_s_at | 1     | -0.21 | 1.55  | 1.75  | 0.13  | 0.78  | 0.36 | - |
| 0.15      | 0.86       | 0.81       | -0.07 | 0.6   | 0.02  | 0.12  |       |       |      |   |
| GENE1850X | 13555_at   | 13555_at   | 1     | -0.23 | 2.01  | 2.25  | -0.65 | 1.09  | 1.03 | - |
| 0.59      | 1.43       | 1.69       | -0.74 | 0.85  | 1.33  | 0.71  |       |       |      |   |
| GENE1849X | 17595_s_at | 17595_s_at | 1     | -0.21 | 1.93  | 2.77  | -0.12 | 1.29  | 1.77 | - |
| 0.16      | 1.24       | 2.81       | -0.38 | 0.36  | 2.14  | 0.46  |       |       |      |   |
| GENE1848X | 20384_at   | 20384_at   | 1     | 0.07  | 2.28  | 3.14  | -0.21 | 1.4   | 1.6  |   |
| 0.32      | 1.17       | 1.68       | -0.08 | 0.61  | 1.1   | -0.47 |       |       |      |   |
| GENE1847X | 17922_at   | 17922_at   | 1     | 0.09  | 1.13  | 1.55  | -0.11 | 1.01  | 1.23 | - |
| 0.02      | 0.72       | 1.24       | -0.04 | 0.28  | 0.62  | 0.12  |       |       |      |   |
| GENE1904X | 16493_at   | 16493_at   | 1     | 1.58  | 3.45  | 3.72  | 1.8   | 3.2   | 3.74 |   |
| 1.63      | 0          | 1.54       | 1.32  | 2     | 1.73  | 1.76  |       |       |      |   |
| GENE1903X | 15703_i_at | 15703_i_at | 1     | 0.69  | 2.32  | 1.98  | 0.47  | 2.23  | 1.2  |   |
| 1.09      | 0.79       | 1.18       | 0.76  | 0.97  | 0.72  | 1     |       |       |      |   |
| GENE1902X | 17014_s_at | 17014_s_at | 1     | 0.69  | 1.11  | 1.08  | 0.65  | 1.02  | 1.37 |   |
| 0.73      | 0.67       | 0.71       | 0.46  | 0.07  | 0.44  | 0.38  |       |       |      |   |
| GENE1901X | 18599_at   | 18599_at   | 1     | 0.21  | 2.12  | 2.34  | 0.21  | 1.55  | 1.44 |   |
| 0.3       | 1.32       | 0.86       | 0.55  | 0.32  | 0.12  | 1.13  |       |       |      |   |
| GENE1900X | 20489_at   | 20489_at   | 1     | 0     | 3.4   | 3.45  | 0     | 3.35  | 2.84 |   |
| 1.76      | 2.13       | 1.13       | 2.58  | 0.26  | 0.67  | 1.67  |       |       |      |   |
| GENE1884X | 14123_at   | 14123_at   | 1     | 0.09  | 1.19  | 0.68  | 0.61  | 1.19  | 1.05 | - |
| 0.28      | 1.06       | 0.47       | -0.06 | 0.73  | 0.1   | 0.61  |       |       |      |   |
| GENE1794X | 15894_at   | 15894_at   | 1     | 0.21  | 1.14  | 1.29  | 0.19  | 0.84  | 1.23 | - |
| 0.07      | 0.51       | 0.54       | -0.29 | 0.25  | 0.71  | 0.35  |       |       |      |   |
| GENE1792X | 15147_s_at | 15147_s_at | 1     | 0.34  | 1.36  | 1.83  | -0.17 | 1.44  | 1.58 |   |
| 0.18      | 0.49       | 0.7        | 0.03  | 0.05  | 0.39  | 1.28  |       |       |      |   |
| GENE1614X | 15965_at   | 15965_at   | 1     | -0.48 | 1.83  | 3.36  | 0.19  | 1.58  | 2.12 |   |
| 0.19      | 0.36       | 0.12       | 0.51  | 0     | 0     | 0.56  |       |       |      |   |
| GENE1613X | 18955_at   | 18955_at   | 1     | 0.47  | 1.58  | 1.53  | 0.11  | 1.9   | 2.08 |   |
| 0.43      | 0.67       | 0.51       | -0.21 | -0.73 | -0.39 | -0.26 |       |       |      |   |
| GENE1610X | 13860_s_at | 13860_s_at | 1     | -0.5  | 0.56  | 1.43  | -0.36 | 0.43  | 1.6  | - |
| 0.39      | 0.94       | 1.36       | -0.61 | 0.7   | 1.31  | -0.37 |       |       |      |   |
| GENE1609X | 17510_at   | 17510_at   | 1     | -0.24 | 0.22  | 1.21  | -0.47 | -0.12 | 0.8  | - |
| 0.28      | 0.49       | 1.22       | -0.54 | 0.09  | 1.15  | -0.15 |       |       |      |   |
| GENE1608X | 19549_s_at | 19549_s_at | 1     | -0.7  | 0.92  | 2.23  | -0.95 | 0.31  | 0.58 | - |
| 0.33      | 0.6        | 1.11       | -0.56 | 0.28  | 0.5   | -0.2  |       |       |      |   |
| GENE1607X | 12536_s_at | 12536_s_at | 1     | 0.34  | 1.69  | 1.73  | -0.31 | 0.38  | 0.87 | - |
| 0.89      | 1          | 1.29       | -1.89 | 0.1   | 1.04  | -0.02 |       |       |      |   |
| GENE1606X | 15842_at   | 15842_at   | 1     | -0.13 | 0.49  | 1.36  | 0.3   | -0.46 | 1.81 |   |
| 0.07      | 0.18       | -0.16      | -1.05 | 0     | 0.61  | -0.17 |       |       |      |   |
| GENE1945X | 16466_s_at | 16466_s_at | 1     | 0.8   | -0.25 | 2.14  | 0.73  | 0.26  | 3.04 |   |
| 1.13      | 1.12       | 3.32       | 0.75  | 1.32  | 3.14  | 0.97  |       |       |      |   |
| GENE1944X | 15960_at   | 15960_at   | 1     | 0.56  | -0.51 | 1.82  | 0.5   | 0.06  | 2.51 |   |
| 0.93      | 0.6        | 2.69       | 0.48  | 0.75  | 2.53  | 1.04  |       |       |      |   |
| GENE1943X | 18945_at   | 18945_at   | 1     | 0.05  | -0.59 | 1.96  | 0.3   | 0.26  | 2.75 |   |
| 0.49      | 1          | 2.73       | 0.25  | 1.04  | 2.29  | 0.16  |       |       |      |   |

|           |            |            |      |          |       |       |       |       |      |   |  |  |  |
|-----------|------------|------------|------|----------|-------|-------|-------|-------|------|---|--|--|--|
| GENE1942X | 16049_s_at | 16049_s_at | 1    | 0.36     | -0.83 | 0.99  | 0.06  | -0.11 | 1.75 |   |  |  |  |
|           | 0.84       | 0.48       | 1.65 | 0.25     | 0.95  | 1.59  | 0.23  |       |      |   |  |  |  |
| GENE1941X | 15488_at   | 15488_at   | 1    | 0.1      | -0.3  | 0.87  | 0.26  | -0.04 | 1.08 | - |  |  |  |
|           | 0.09       | 0.14       | 1.15 | 0.49     | 0.09  | 1.12  | 0.09  |       |      |   |  |  |  |
| GENE1940X | 19152_at   | 19152_at   | 1    | -0.26    | 0.19  | 3.45  | 0.87  | 0.65  | 3.32 |   |  |  |  |
|           | 0.41       | 2.74       | 4.19 | -0.26    | 1.28  | 2.68  | 0     |       |      |   |  |  |  |
| GENE1939X | 19638_at   | 19638_at   | 1    | 0.27     | 0.17  | 1.38  | 0.48  | 0.87  | 1.86 |   |  |  |  |
|           | 0.65       | 1.03       | 1.76 | 0.35     | 0.49  | 1.5   | 0.19  |       |      |   |  |  |  |
| GENE1787X | 19854_at   | 19854_at   | 1    | 0.64     | 0.6   | 1.54  | 0.64  | 0.85  | 2.15 |   |  |  |  |
|           | 0.52       | -0.17      | 2.03 | 0.32     | -0.14 | 2.31  | -0.34 |       |      |   |  |  |  |
| GENE1786X | 18949_at   | 18949_at   | 1    | 0.74     | -0.09 | 1.87  | 0.91  | 0.55  | 2.49 | 1 |  |  |  |
|           | -0.33      | 2.12       | 0.5  | -0.1     | 2.55  | 0.88  |       |       |      |   |  |  |  |
| GENE1785X | 19707_s_at | 19707_s_at | 1    | 0.49     | -0.19 | 1.64  | 0.77  | 0.14  | 2.63 |   |  |  |  |
|           | 0.76       | -0.56      | 1.96 | 0.54     | -0.23 | 2.23  | 0.63  |       |      |   |  |  |  |
| GENE1784X | 14097_at   | 14097_at   | 1    | 1.75     | 0     | 1.89  | 1.71  | 0.88  | 3.29 |   |  |  |  |
|           | 1.39       | 0.5        | 2.19 | 1.89     | -0.53 | 1.62  | -0.16 |       |      |   |  |  |  |
| GENE1958X | 12535_at   | 12535_at   | 1    | 0        | 0.67  | 0.67  | 0     | 1.26  | 3.45 | 1 |  |  |  |
|           | 1.84       | 3.37       | 0    | 0.48     | 3.8   | 2.13  |       |       |      |   |  |  |  |
| GENE1938X | 12802_at   | 12802_at   | 1    | 0.03     | 0.28  | 3.47  | 0.2   | 0.54  | 3.71 | - |  |  |  |
|           | 0.09       | 1          | 4.3  | 0.13     | 1.14  | 4.42  | 2.5   |       |      |   |  |  |  |
| GENE1937X | 20393_at   | 20393_at   | 1    | 0.41     | 0.15  | 1.2   | -0.33 | 0.67  | 1.48 |   |  |  |  |
|           | 0.22       | 0.7        | 1.58 | 0.22     | 0.24  | 1.56  | 0.56  |       |      |   |  |  |  |
| GENE1798X | 13426_at   | 13426_at   | 1    | -0.48    | 0.84  | 2.07  | -0.22 | 2.2   | 3.6  | - |  |  |  |
|           | 0.48       | 1.67       | 2.2  | 0        | 0     | 1.76  | 1.58  |       |      |   |  |  |  |
| GENE1797X | 20641_at   | 20641_at   | 1    | 0        | 1.13  | 2.07  | 0     | 1.48  | 4.36 | 0 |  |  |  |
|           | 1          | 3.86       | 0.67 | 0        | 2.48  | 0.67  |       |       |      |   |  |  |  |
| GENE1805X | 19463_s_at | 19463_s_at | 1    | 0.14     | 1.27  | 1.79  | 0.06  | 1.05  | 1.67 |   |  |  |  |
|           | 0.3        | 0.2        | 1.04 | 0.27     | 0.8   | 1.53  | 0.86  |       |      |   |  |  |  |
| GENE1804X | 13236_at   | 13236_at   | 1    | -0.03    | 0.72  | 1.41  | 0.14  | 0.51  | 1.4  |   |  |  |  |
|           | 0.27       | 0.03       | 1.03 | 0.37     | 0.63  | 1.5   | 1.17  |       |      |   |  |  |  |
| GENE1803X | 17963_at   | 17963_at   | 1    | 1.28     | 1.35  | 2.41  | 1.11  | 1.26  | 3    |   |  |  |  |
|           | 1.21       | 1.1        | 2.43 | 1.14     | 0.71  | 2.01  | 1.45  |       |      |   |  |  |  |
| GENE1802X | 19851_at   | 19851_at   | 1    | 1        | 1.12  | 2.1   | 0.96  | 1.4   | 2.52 |   |  |  |  |
|           | 0.92       | 0.9        | 1.83 | 0.8      | 0.6   | 1.86  | 2.6   |       |      |   |  |  |  |
| GENE1801X | 20470_at   | 20470_at   | 1    | 0        | 0.41  | 2.61  | 0     | 1.15  | 3.7  | 0 |  |  |  |
|           | 0.41       | 1.85       | 0    | 0.63     | 2.67  | 2.43  |       |       |      |   |  |  |  |
| GENE1800X | 16082_s_at | 16082_s_at | 1    | 0.09     | 0.43  | 1.63  | -0.05 | 0.62  | 2.01 |   |  |  |  |
|           | 0.37       | 0.28       | 1.2  | -0.14    | -0.15 | 1.01  | 1.45  |       |      |   |  |  |  |
| GENE1799X | 12240_at   | 12240_at   | 1    | 0.48     | 0.83  | 3.9   | 0.26  | 0.61  | 3.7  | 0 |  |  |  |
|           | -0.34      | 2.05       | 0.84 | -0.28    | 2.11  | 2.24  |       |       |      |   |  |  |  |
| GENE1796X | 19843_at   | 19843_at   | 1    | -0.00882 |       | 1.14  | 1.32  | 0.08  | 0.95 |   |  |  |  |
|           | 1.46       | 0.29       | 0.32 | 0.9      | 0.36  | -0.22 | 0.74  | 0.11  |      |   |  |  |  |
| GENE1795X | 14398_at   | 14398_at   | 1    | 0.23     | 0.42  | 1.07  | 0.29  | 0.58  | 1.02 |   |  |  |  |
|           | 0.17       | 0.26       | 0.77 | 0.27     | -0.24 | 0.71  | -0.11 |       |      |   |  |  |  |
| GENE1806X | 15208_at   | 15208_at   | 1    | 0.83     | 0.32  | 1.15  | -1.84 | 0.1   | 0.88 |   |  |  |  |
|           | 1.73       | 0.03       | 0.54 | 0.53     | 0     | 1.52  | -0.68 |       |      |   |  |  |  |
| GENE1810X | 13171_at   | 13171_at   | 1    | -0.33    | 0.21  | 1.17  | -0.54 | 0.28  | 0.92 |   |  |  |  |
|           | 0.58       | 0.67       | 0.36 | -0.29    | 0.4   | 1.32  | -0.92 |       |      |   |  |  |  |
| GENE1809X | 14367_at   | 14367_at   | 1    | 0        | 0.61  | 1.17  | 0.09  | 1.77  | 3.07 |   |  |  |  |
|           | 0.78       | 1.08       | 1.9  | 0.6      | 0.43  | 1.2   | -1.41 |       |      |   |  |  |  |
| GENE1808X | 16038_s_at | 16038_s_at | 1    | -0.69    | 0.05  | 1.62  | -0.58 | 0.96  | 1.7  | - |  |  |  |
|           | 0.1        | 0.86       | 1.4  | 0.03     | 0.24  | 0.32  | -1    |       |      |   |  |  |  |
| GENE1807X | 12251_at   | 12251_at   | 1    | -0.31    | 0.61  | 0.83  | -0.27 | 1.06  | 0.68 | - |  |  |  |
|           | 0.23       | 0.02       | 1.54 | 0.02     | 0.14  | 1.58  | -1.37 |       |      |   |  |  |  |
| GENE1814X | 15600_s_at | 15600_s_at | 1    | 0.52     | 1.08  | 2.27  | 0.07  | -0.28 | 0.7  |   |  |  |  |
|           | 0.65       | 1.52       | 2.73 | 0.51     | 0.67  | 1.84  | -1.24 |       |      |   |  |  |  |

|           |            |            |       |         |       |       |       |       |       |
|-----------|------------|------------|-------|---------|-------|-------|-------|-------|-------|
| GENE1813X | 18437_at   | 18437_at   | 1     | 0.58    | 0.68  | 2.5   | 0.07  | -0.08 | 0.87  |
|           | 0.95       | 1.61       | 2.05  | 0.63    | 0.15  | 0.73  | -1.84 |       |       |
| GENE1812X | 17373_at   | 17373_at   | 1     | 0.52    | 0.72  | 1.24  | 0.2   | 0.42  | 0.36  |
|           | 0.27       | 0.47       | 1.41  | 0.18    | 0.03  | 0.32  | -0.99 |       |       |
| GENE1811X | 13560_at   | 13560_at   | 1     | -0.01   | 0.57  | 0.74  | 0.23  | 0.28  | -0.06 |
|           | 0.26       | 0.6        | 1.21  | 0.1     | 0.12  | 0.42  | 0.05  |       |       |
| GENE1836X | 15110_s_at | 15110_s_at | 1     | -0.06   | 0.41  | 0.68  | -0.16 | 0.43  | 0.71  |
|           | 0.21       | 0.81       | 1.05  | 0.15    | 0.57  | 0.6   | -0.53 |       |       |
| GENE1826X | 13004_at   | 13004_at   | 1     | 0.35    | 0.21  | 0.91  | 0.41  | 0.35  | 0.82  |
|           | 0.58       | 1.09       | 1.81  | 0.28    | 1.16  | 1.88  | -0.75 |       |       |
| GENE1825X | 19677_at   | 19677_at   | 1     | 0.14    | 0.37  | 0.71  | 0.15  | 0.17  | 0.49  |
|           | 0.2        | 1          | 1.25  | 0.00362 |       | 0.95  | 1.33  | -0.45 |       |
| GENE1642X | 14896_at   | 14896_at   | 1     | 0.11    | -0.1  | 1.1   | -0.47 | -0.33 | 0.22  |
|           | 0.21       | 0.87       | 1.89  | -0.12   | 0.27  | 0.9   | -1.09 |       |       |
| GENE2476X | 12730_f_at | 12730_f_at | 1     | 2.8     | 0.86  | 1.57  | 0.48  | -0.77 | -0.34 |
|           | 3.51       | 0.63       | 1.12  | 3       | 0     | -0.14 | 2.92  |       |       |
| GENE2475X | 16099_at   | 16099_at   | 1     | 0.69    | 0.05  | 0.92  | 0.4   | -0.48 | -0.24 |
|           | 0.81       | -0.22      | 0.36  | 0.68    | -0.89 | -0.75 | 1.26  |       |       |
| GENE2474X | 18298_at   | 18298_at   | 1     | 0.7     | -0.08 | -0.44 | -0.62 | -0.08 | -0.81 |
|           | 1.03       | 0.16       | 0.87  | 0.65    | -1.08 | -0.44 | 1.49  |       |       |
| GENE2480X | 16457_s_at | 16457_s_at | 1     | -0.12   | -0.72 | -1.62 | 0.62  | -0.33 | -0.61 |
|           | 1.4        | -0.01      | -0.46 | 1.63    | 0.67  | 0.25  | 1.6   |       |       |
| GENE2479X | 15683_s_at | 15683_s_at | 1     | 0.46    | -0.61 | -0.65 | 0.71  | -0.07 | -0.19 |
|           | 1.09       | 0.02       | -0.13 | 1.17    | 0.34  | -0.13 | 0.77  |       |       |
| GENE2478X | 18167_s_at | 18167_s_at | 1     | 0.06    | -0.97 | -0.5  | 0.54  | -0.56 | -0.42 |
|           | 1.85       | 0.37       | -0.04 | 1.49    | 0.34  | 0     | 0.93  |       |       |
| GENE2397X | 12988_at   | 12988_at   | 1     | 1       | -0.73 | -0.75 | 1.13  | -0.04 | 0.58  |
|           | 1.13       | 0.48       | -0.1  | 0.9     | 1.19  | 0.69  | 0.89  |       |       |
| GENE2396X | 12308_at   | 12308_at   | 1     | 0.97    | -0.8  | -0.35 | 0.64  | -0.36 | 0     |
|           | 1.18       | 0.15       | 0.47  | 0.87    | 0.62  | 0.45  | 0.22  |       |       |
| GENE2485X | 14431_at   | 14431_at   | 1     | 1.8     | 0.03  | -1.16 | 2.15  | 1.47  | 0.66  |
|           | 2.36       | 0.25       | -0.94 | 2.32    | 1.74  | -0.08 | 3.71  |       |       |
| GENE2484X | 19394_at   | 19394_at   | 1     | 1.03    | 0.11  | -0.44 | 0.75  | 0.46  | 0     |
|           | 0.89       | 0.4        | -0.27 | 1.39    | 0.64  | -0.16 | 1.54  |       |       |
| GENE2483X | 12497_at   | 12497_at   | 1     | 1.43    | -0.02 | -0.69 | 1.57  | 0.34  | -0.18 |
|           | 1.82       | 0.32       | -0.57 | 1.93    | 0.43  | -0.28 | 2.27  |       |       |
| GENE2482X | 15616_s_at | 15616_s_at | 1     | 0.36    | -0.18 | -0.25 | 0.54  | -0.09 | 0.11  |
|           | 0.62       | 0.06       | -0.3  | 0.88    | 0.18  | -0.1  | 1.74  |       |       |
| GENE2481X | 16360_at   | 16360_at   | 1     | 0.87    | -0.16 | -0.52 | 0.85  | 0.13  | -0.01 |
|           | 0.83       | -0.02      | -0.84 | 0.79    | 0.05  | -0.33 | 1.85  |       |       |
| GENE2525X | 17368_at   | 17368_at   | 1     | 0.53    | 0     | 0.08  | 1.91  | 0.28  | 0.08  |
|           | 1.15       | 1.2        | -0.49 | 2.18    | 0.86  | -0.27 | 1.28  |       |       |
| GENE2364X | 15085_at   | 15085_at   | 1     | 1.86    | -0.33 | -0.69 | 1.8   | 0.06  | 0.2   |
|           | 2.21       | 0.19       | -0.14 | 2.42    | 0.56  | 0.61  | 1.73  |       |       |
| GENE2363X | 20369_s_at | 20369_s_at | 1     | 1.18    | -0.34 | -0.32 | 1.24  | 0.17  | 0.36  |
|           | 1.4        | 0.05       | -0.36 | 1.24    | 0.46  | -0.12 | 1.01  |       |       |
| GENE2362X | 12354_g_at | 12354_g_at | 1     | 1.42    | 0.05  | -0.13 | 1.1   | 0.32  | 0.36  |
|           | 1.31       | 0.45       | -0.65 | 0.94    | 0.61  | -0.57 | 1.03  |       |       |
| GENE2361X | 12353_at   | 12353_at   | 1     | 1.48    | 0.05  | -0.12 | 1.09  | 0.37  | 0.27  |
|           | 1.36       | 0.41       | -0.58 | 1.03    | 0.57  | -0.37 | 1.27  |       |       |
| GENE2360X | 16365_at   | 16365_at   | 1     | 4.45    | 1.27  | -0.58 | 5.47  | 1.5   | -0.14 |
|           | 3.86       | 0.18       | -2.02 | 4.42    | 0.38  | -2.43 | 5     |       |       |
| GENE2349X | 14964_at   | 14964_at   | 1     | 2.19    | 1.11  | -0.48 | 2.21  | 1.36  | -0.25 |
|           | 1.9        | -0.01      | -2.32 | 1.76    | 0.55  | -2.22 | 1.79  |       |       |
| GENE2348X | 17207_at   | 17207_at   | 1     | 1.58    | 1.55  | -0.26 | 1.67  | 1.32  | -0.19 |
|           | 1.64       | -0.13      | -1.74 | 1.44    | 0.34  | -1.98 | 1.62  |       |       |

|           |            |             |      |       |       |       |      |       |       |
|-----------|------------|-------------|------|-------|-------|-------|------|-------|-------|
| GENE2347X | 19216_at   | 19216_at    | 1    | 0.65  | 0.52  | 0.08  | 0.4  | 0.35  | -0.17 |
|           | 0.41       | 0.42 -0.3   | 0.49 | 0.26  | -1.26 | 0.67  |      |       |       |
| GENE2344X | 12239_at   | 12239_at    | 1    | 0.49  | 1.14  | 0.67  | 1.31 | 0.68  | 0.53  |
|           | 1.23       | -0.35 0.71  | 0.82 | -0.7  | -1.19 | 0     |      |       |       |
| GENE2355X | 20608_s_at | 20608_s_at  | 1    | 2.23  | 0.53  | 0.51  | 0.68 | 0.28  | -0.48 |
|           | 1.87       | -0.84 -0.48 | 1.5  | -0.84 | -0.48 | 0     |      |       |       |
| GENE2346X | 12739_s_at | 12739_s_at  | 1    | 0.88  | -0.06 | 0.44  | 0.77 | -0.15 | -0.83 |
|           | 1.28       | -0.02 -0.42 | 0.64 | -0.54 | -1.65 | 0.41  |      |       |       |
| GENE2345X | 14472_at   | 14472_at    | 1    | 0.84  | 0.78  | 0.45  | 1.18 | 0.31  | -0.66 |
|           | 1.07       | -0.09 -1.13 | 1.35 | -0.45 | -1.83 | 0.41  |      |       |       |
| GENE2359X | 19427_s_at | 19427_s_at  | 1    | 0.59  | 0.27  | -0.07 | 0.79 | -0.12 | 0.02  |
|           | 0.62       | -0.09 -0.54 | 1.14 | 0.08  | -0.44 | 0.45  |      |       |       |
| GENE1488X | 12949_at   | 12949_at    | 1    | 1.19  | 0.28  | -0.36 | 1.27 | -0.18 | -1.28 |
|           | 1.27       | -0.23 -0.46 | 1.62 | -0.39 | -1.11 | 1.19  |      |       |       |
| GENE1487X | 17886_at   | 17886_at    | 1    | 0.47  | 0.06  | -0.98 | 0.93 | 0.18  | -0.75 |
|           | 2.56       | -0.37 -1.36 | 2.56 | -0.56 | -1.91 | 1.37  |      |       |       |
| GENE1486X | 13806_at   | 13806_at    | 1    | 0.75  | 0.24  | -0.1  | 1    | 0.22  | -0.64 |
|           | 1.48       | -0.66 -1.05 | 1.46 | -0.94 | -1.79 | 1.39  |      |       |       |
| GENE1377X | 15338_at   | 15338_at    | 1    | 0.64  | -0.25 | 0.11  | 1.18 | -0.47 | -0.06 |
|           | 0.37       | -0.49 -0.61 | 0.7  | -0.27 | -0.74 | 0.03  |      |       |       |
| GENE1376X | 16488_at   | 16488_at    | 1    | 1.13  | -0.07 | -0.68 | 1.02 | 0.11  | -0.67 |
|           | 1.04       | -1.4 -1.43  | 1.49 | -1.16 | -2    | 0.5   |      |       |       |
| GENE1375X | 19195_at   | 19195_at    | 1    | 1.95  | 0.21  | -0.36 | 1.09 | 0.16  | -0.36 |
|           | 1.74       | -2.32 -1.84 | 1.34 | -2.32 | -1.36 | -0.12 |      |       |       |
| GENE1390X | 13660_i_at | 13660_i_at  | 1    | 0.97  | -0.73 | 0.77  | 0.38 | 0.55  | 0.65  |
|           | 1.14       | -0.9 -0.48  | 0.6  | -0.44 | 0.19  | 0     |      |       |       |
| GENE1389X | 11996_at   | 11996_at    | 1    | 0.4   | 0.04  | 0.49  | 0.55 | 0.44  | 1.2   |
|           | 0.21       | -0.46 0.03  | 0.28 | -0.59 | 0.02  | 0.17  |      |       |       |
| GENE1388X | 14479_at   | 14479_at    | 1    | 1.04  | 0.51  | 1.01  | 0.8  | 0.71  | 1.17  |
|           | 0.99       | -0.29 -0.25 | 0.79 | -0.68 | -0.49 | -0.08 |      |       |       |
| GENE1387X | 16217_s_at | 16217_s_at  | 1    | 0.43  | 0.32  | 1.51  | 0.5  | 0.75  | 1.32  |
|           | 0.95       | -1 0.86     | 0.87 | -1.67 | 0.54  | 0.94  |      |       |       |
| GENE2376X | 12759_at   | 12759_at    | 1    | 0.56  | -0.65 | -0.94 | 0.53 | -0.07 | -0.2  |
|           | 1.31       | -0.62 0.33  | 1.16 | 0.53  | 1.04  | -0.66 |      |       |       |
| GENE2375X | 16893_at   | 16893_at    | 1    | 0.51  | -0.5  | -0.3  | 0.35 | -0.18 | 0.18  |
|           | 1.06       | -0.27 -0.37 | 0.53 | 0.29  | -0.15 | -0.48 |      |       |       |
| GENE1591X | 14077_at   | 14077_at    | 1    | -0.43 | -2.46 | -1.83 | 1.41 | -0.98 | -0.56 |
|           | 1.09       | -1.31 0.04  | 1.7  | 0.37  | -0.08 | -0.51 |      |       |       |
| GENE1589X | 13695_at   | 13695_at    | 1    | 0.04  | -0.93 | -0.73 | 0.48 | -1.1  | -0.14 |
|           | 0.64       | 0.22 -0.11  | 0.57 | 0.1   | -0.02 | 0.19  |      |       |       |
| GENE2477X | 16620_s_at | 16620_s_at  | 1    | -0.03 | -1.86 | 0.28  | 1.15 | -0.63 | -0.23 |
|           | 2.24       | -0.32 0.91  | 2.46 | 0.28  | 0.03  | 1.4   |      |       |       |
| GENE1383X | 18300_at   | 18300_at    | 1    | 0.41  | -1.23 | -0.39 | 0.57 | -0.85 | -0.69 |
|           | 0.98       | -0.09 0.71  | 1    | -0.61 | 0.63  | 0     |      |       |       |
| GENE1382X | 20368_at   | 20368_at    | 1    | 0.48  | -1.26 | 0.45  | 0    | -1.26 | -0.67 |
|           | 0.67       | -1.26 0     | 3.37 | -1.26 | 0.8   | 0     |      |       |       |
| GENE1379X | 15039_at   | 15039_at    | 1    | 0.07  | -0.26 | 0.24  | -0.3 | -0.32 | -0.1  |
|           | 1.43       | -0.65 -0.23 | 1.23 | -0.86 | -0.45 | -0.23 |      |       |       |
| GENE1378X | 18896_at   | 18896_at    | 1    | -0.46 | -1.04 | -0.87 | 0.05 | -0.18 | -0.44 |
|           | 0.84       | -1.04 -0.95 | 1.44 | -0.98 | -0.6  | -0.18 |      |       |       |
| GENE1678X | 17490_s_at | 17490_s_at  | 1    | 0.53  | -0.03 | 0.16  | 0.46 | -0.23 | 0.14  |
|           | 0.4        | -0.31 0.06  | 0.38 | -0.33 | 0.04  | 1.32  |      |       |       |
| GENE1492X | 14036_at   | 14036_at    | 1    | 0.78  | -0.5  | -0.73 | 0.75 | -0.07 | 0.02  |
|           | 0.48       | -0.43 -0.16 | 0.42 | -0.32 | 0.22  | 1.24  |      |       |       |
| GENE1386X | 18176_at   | 18176_at    | 1    | 0     | -0.36 | -0.12 | 0.42 | 0     | -0.18 |
|           | 0.15       | -1.43 -0.15 | 1.2  | -0.54 | -0.12 | 1.06  |      |       |       |

|           |            |            |       |       |       |       |       |       |       |   |  |
|-----------|------------|------------|-------|-------|-------|-------|-------|-------|-------|---|--|
| GENE1494X | 17481_at   | 17481_at   | 1     | 0.62  | -0.69 | -0.47 | 0.93  | -0.65 | -0.17 |   |  |
|           | 0.49       | 0.13       | -0.75 | -0.03 | 0     | -0.4  | 1.34  |       |       |   |  |
| GENE1493X | 14110_i_at | 14110_i_at | 1     | 0.41  | -0.83 | -0.57 | 0.68  | -0.88 | -0.27 |   |  |
|           | 0.47       | 0.29       | -0.13 | 0.83  | -0.33 | -0.39 | 2.23  |       |       |   |  |
| GENE1491X | 20625_at   | 20625_at   | 1     | 1     | -0.59 | -0.33 | -0.09 | -0.64 | -0.26 |   |  |
|           | 1.09       | -0.39      | -0.56 | 1.3   | -0.41 | -1.23 | 2.39  |       |       |   |  |
| GENE1490X | 17499_s_at | 17499_s_at | 1     | 0.66  | -0.66 | -0.56 | 0.54  | -0.43 | -0.51 |   |  |
|           | 0.45       | -0.58      | -1.08 | 0.71  | -0.45 | -1.2  | 1.28  |       |       |   |  |
| GENE1489X | 17068_at   | 17068_at   | 1     | 1.17  | -0.61 | -0.85 | 1.02  | -0.1  | -0.17 |   |  |
|           | 0.8        | -0.67      | -1.27 | 0.82  | -0.58 | -1.28 | 1.98  |       |       |   |  |
| GENE1381X | 15920_i_at | 15920_i_at | 1     | 0.46  | -0.84 | -0.53 | 0.45  | -1.13 | -0.67 |   |  |
|           | 0.23       | -0.33      | -0.24 | 0.65  | -0.88 | -0.24 | 0.62  |       |       |   |  |
| GENE1380X | 16132_s_at | 16132_s_at | 1     | 0.11  | -0.68 | -0.35 | 0.13  | -1.5  | -0.76 |   |  |
|           | 0.07       | -0.82      | -0.33 | 0.18  | -1.16 | -0.36 | 0.34  |       |       |   |  |
| GENE1397X | 13056_at   | 13056_at   | 1     | 0.5   | -1.18 | 0.45  | 0.61  | -1.21 | 0.35  |   |  |
|           | 0.39       | -0.19      | 0.85  | 0.44  | -0.17 | 0.79  | 0.85  |       |       |   |  |
| GENE1396X | 13290_at   | 13290_at   | 1     | -0.04 | -1.03 | 0.22  | 0.2   | -1    | 0.06  |   |  |
|           | 0.15       | -0.22      | 0.44  | 0.44  | -0.18 | 0.62  | -0.18 |       |       |   |  |
| GENE1395X | 17538_at   | 17538_at   | 1     | -0.15 | -1.02 | 0.11  | 0.49  | -0.92 | 0.67  | 0 |  |
|           | -0.1       | 0.15       | 0.2   | -1.02 | 0.19  | 0.32  |       |       |       |   |  |
| GENE1399X | 13705_at   | 13705_at   | 1     | -0.46 | -0.71 | 1.18  | 0.38  | -0.64 | -0.17 | - |  |
|           | 0.19       | -1.35      | 0.54  | 0.43  | -0.82 | -0.1  | 0.58  |       |       |   |  |
| GENE1398X | 12726_f_at | 12726_f_at | 1     | -0.93 | -1.38 | 1.66  | 0.64  | -0.66 | 0.86  |   |  |
|           | 0.43       | -2.02      | 1.19  | 0.17  | -1.14 | 0.55  | 2.17  |       |       |   |  |
| GENE1394X | 12375_s_at | 12375_s_at | 1     | -0.51 | -0.81 | 0.59  | 1.05  | -0.15 | 0.59  |   |  |
|           | 0.52       | -1.17      | 0.31  | 0.8   | -0.64 | 0.04  | 0.31  |       |       |   |  |
| GENE1393X | 12374_i_at | 12374_i_at | 1     | -0.09 | -1.03 | 1.38  | 1.19  | -0.09 | 1.24  |   |  |
|           | 0.72       | -1.1       | 1.12  | 1.13  | -0.74 | 0.62  | 0.76  |       |       |   |  |
| GENE1392X | 12333_at   | 12333_at   | 1     | 0.41  | -0.31 | 0.46  | 0.83  | -0.71 | 1.38  |   |  |
|           | 0.47       | -0.84      | 0.34  | 0.47  | -0.77 | 0.38  | 0.14  |       |       |   |  |
| GENE1391X | 13967_at   | 13967_at   | 1     | 0.11  | -0.33 | 0.68  | 1.05  | -0.14 | 1.73  |   |  |
|           | 0.62       | -1.02      | 0.89  | 0.84  | -2.14 | 0.97  | 0.39  |       |       |   |  |
| GENE1599X | 12510_at   | 12510_at   | 1     | 0.16  | 0.25  | -0.23 | -0.08 | 0.95  | -4.32 | - |  |
|           | 0.04       | 0.77       | -0.1  | -0.06 | 0.84  | 0.41  | 0.11  |       |       |   |  |
| GENE1598X | 13484_at   | 13484_at   | 1     | 0.14  | 0.21  | -0.24 | 0.19  | 0.36  | -4.44 | - |  |
|           | 0.3        | -0.05      | -0.79 | -0.38 | -0.36 | -0.61 | -0.27 |       |       |   |  |
| GENE1597X | 12476_at   | 12476_at   | 1     | 0.16  | 0.34  | 0.68  | -0.18 | 0.38  | -1.65 | - |  |
|           | 0.33       | 0.3        | 0.21  | 0.22  | 0.19  | -0.09 | 0.19  |       |       |   |  |
| GENE1596X | 12325_at   | 12325_at   | 1     | 0.29  | -0.29 | -1.15 | 0.2   | -1.19 | -2    |   |  |
|           | 0.38       | 0.64       | 1.37  | 0.62  | -0.09 | 1.29  | -0.89 |       |       |   |  |
| GENE1595X | 12940_at   | 12940_at   | 1     | 0.43  | -0.02 | 0.22  | -0.04 | -0.46 | -1.05 |   |  |
|           | 0.28       | -0.18      | 0.31  | 0.07  | -0.61 | 0.14  | -0.12 |       |       |   |  |
| GENE1594X | 18275_at   | 18275_at   | 1     | 0.04  | 0.08  | 0.51  | -0.17 | -0.54 | -0.61 |   |  |
|           | 0.36       | 0.45       | 0.44  | 0.1   | 0.01  | -0.72 | -1.18 |       |       |   |  |
| GENE1593X | 14688_at   | 14688_at   | 1     | 0.23  | 0.32  | 0.15  | -0.38 | -0.59 | -0.83 |   |  |
|           | 0.04       | 0.37       | 0.14  | 0     | -0.04 | -0.32 | -1.01 |       |       |   |  |
| GENE1428X | 19221_at   | 19221_at   | 1     | 0.33  | 0.81  | 0.53  | 0.44  | -0.27 | -0.68 |   |  |
|           | 0.62       | 0.35       | -0.16 | 0.12  | -0.27 | -0.47 | -1.04 |       |       |   |  |
| GENE1588X | 19759_at   | 19759_at   | 1     | 0.33  | -0.86 | -1.86 | 0.06  | -0.67 | -1.51 |   |  |
|           | 0.13       | -0.54      | -0.73 | 0.27  | 0.02  | -0.32 | -0.93 |       |       |   |  |
| GENE1587X | 16897_i_at | 16897_i_at | 1     | 0.44  | -0.95 | -2.02 | 0.53  | -0.43 | -1.23 |   |  |
|           | 0.62       | -0.06      | -0.76 | 0.4   | -0.1  | -0.35 | -0.32 |       |       |   |  |
| GENE1586X | 16898_s_at | 16898_s_at | 1     | 0.09  | -1.1  | -2.14 | 0.38  | -0.8  | -1.25 |   |  |
|           | 0.47       | -0.31      | -0.73 | 0.17  | -0.17 | -0.27 | -0.48 |       |       |   |  |
| GENE1585X | 12817_g_at | 12817_g_at | 1     | 0.01  | -1    | -2.27 | 0.49  | 0.14  | -0.71 |   |  |
|           | 0.2        | -0.49      | -1.3  | 0.88  | 0.23  | -0.84 | -0.5  |       |       |   |  |

|           |            |            |       |       |         |          |         |       |       |
|-----------|------------|------------|-------|-------|---------|----------|---------|-------|-------|
| GENE1584X | 18761_at   | 18761_at   | 1     | 0.19  | -1.63   | -2.38    | 0.5     | -0.74 | -1.35 |
|           | 0.11       | -1.27      | -1.73 | 0.11  | -0.35   | -1.29    | -0.73   |       |       |
| GENE1583X | 19471_at   | 19471_at   | 1     | 0.39  | -1.1    | -1.95    | 0.39    | -0.9  | -1.22 |
|           | 0.77       | -0.73      | -1    | 0.98  | -0.44   | -1       | -0.55   |       |       |
| GENE1590X | 20537_at   | 20537_at   | 1     | 0.49  | -1.52   | -2.03    | 1.2     | -0.98 | -1.45 |
|           | 0.92       | -0.22      | -0.86 | 1.6   | 0.23    | 0.08     | -0.88   |       |       |
| GENE1582X | 12471_s_at | 12471_s_at | 1     | 0.05  | -1.34   | -2.25    | 0.73    | -0.84 | -1.42 |
|           | 0.53       | 0.13       | -0.74 | 1.07  | 0.56    | -0.32    | 0.11    |       |       |
| GENE1581X | 17897_at   | 17897_at   | 1     | 0.43  | -0.48   | -1.36    | 0.59    | -0.58 | -1.11 |
|           | 0.37       | -0.21      | -0.7  | 0.72  | -0.04   | -0.09    | 0.00746 |       |       |
| GENE1580X | 16021_at   | 16021_at   | 1     | -0.09 | -0.69   | -1.91    | 0.2     | -0.27 | -1.15 |
|           | 0.14       | -0.53      | -0.41 | 0.09  | -0.17   | -0.27    | 0.51    |       |       |
| GENE1579X | 20015_at   | 20015_at   | 1     | 0.55  | -2.25   | -2.68    | 1.45    | -1.09 | -1.87 |
|           | 1.13       | -1.56      | -1.56 | 1.51  | -0.9    | -1.36    | 1.7     |       |       |
| GENE1574X | 16528_at   | 16528_at   | 1     | -0.06 | -0.88   | -1.09    | 0.36    | 0.08  | 0.32  |
|           | 0.42       | -0.67      | -0.51 | 0.63  | -0.07   | -0.00836 | -0.82   |       |       |
| GENE1573X | 17409_at   | 17409_at   | 1     | 0.13  | -0.53   | -1.34    | 0.05    | -0.04 | -0.05 |
|           | 0.07       | -0.72      | -0.32 | 0.2   | -0.25   | -0.17    | -0.19   |       |       |
| GENE1571X | 17362_at   | 17362_at   | 1     | 1.92  | 0       | -3.23    | 3.63    | 1.37  | 0.67  |
|           | 2.67       | 2.37       | -2.74 | 1.76  | 1.13    | -0.69    | -0.63   |       |       |
| GENE1570X | 12293_at   | 12293_at   | 1     | 0.55  | -0.35   | -0.67    | 0.91    | 0.2   | -0.05 |
|           | 0.24       | -0.67      | 0.69  | 0.56  | -0.14   | -1.01    |         |       | 1     |
| GENE1569X | 14897_at   | 14897_at   | 1     | 0.31  | -0.22   | -0.91    | 0.45    | 0.09  | -0.6  |
|           | 0.55       | 0.26       | -0.75 | 0.49  | 1.1     | -0.18    | 0       |       |       |
| GENE1568X | 12153_at   | 12153_at   | 1     | 0.19  | -0.25   | -1.06    | 0.24    | 0.2   | -0.93 |
|           | 0.05       | 0.17       | -1.14 | 0.48  | 0.6     | -0.4     | -0.11   |       |       |
| GENE1567X | 15836_at   | 15836_at   | 1     | 0.51  | -0.36   | -1.25    | 0.73    | 0.02  | -0.23 |
|           | 0.68       | 0          | -0.33 | 0.53  | 0.65    | -0.00778 | 0.46    |       |       |
| GENE1566X | 13538_at   | 13538_at   | 1     | 1.3   | -0.56   | -1.96    | 1.32    | 0.69  | -0.36 |
|           | 1.83       | 0.02       | -1.11 | 1.82  | 0.63    | -0.15    | 1.14    |       |       |
| GENE1565X | 12249_s_at | 12249_s_at | 1     | 1.04  | -0.53   | -1.38    | 0.86    | 0.49  | -0.81 |
|           | 1.14       | -0.14      | -0.81 | 1.02  | 0.63    | -0.09    | 0.91    |       |       |
| GENE1564X | 16323_at   | 16323_at   | 1     | 0.78  | -0.27   | -0.67    | 0.9     | 0.52  | 0.15  |
|           | 0.66       | -0.24      | -1.12 | 0.68  | 0.4     | -0.6     | 0.82    |       |       |
| GENE1563X | 19267_s_at | 19267_s_at | 1     | 2.44  | 1.13    | -1.94    | 2.04    | 1.94  | -0.49 |
|           | 2.66       | 0.13       | -2.38 | 2.28  | 0.9     | -1.74    | 2.07    |       |       |
| GENE1562X | 14612_at   | 14612_at   | 1     | 1.79  | 0.37    | -1.71    | 1.77    | 1.86  | -0.45 |
|           | 2.22       | -0.33      | -2.23 | 1.89  | -0.04   | -1.62    | 2.2     |       |       |
| GENE1561X | 17990_at   | 17990_at   | 1     | 0.92  | 0.16    | -1.34    | 0.88    | 0.34  | -0.6  |
|           | 1.2        | -0.18      | -0.8  | 1     | -0.02   | -0.64    | 0.83    |       |       |
| GENE1560X | 14631_s_at | 14631_s_at | 1     | 1.36  | 0.43    | -2       | 1.2     | 0.84  | -0.82 |
|           | 1.75       | -0.13      | -1.01 | 1.22  | -0.13   | -0.56    | 1.18    |       |       |
| GENE1559X | 16077_s_at | 16077_s_at | 1     | 0.79  | -0.68   | -1.17    | 1.06    | 0.09  | -0.31 |
|           | 1.51       | -0.05      | -0.76 | 1.67  | 0.32    | -0.6     | 0.3     |       |       |
| GENE1558X | 17579_s_at | 17579_s_at | 1     | 1.13  | -0.63   | -1.28    | 1.27    | 0.05  | -0.43 |
|           | 1.82       | -0.16      | -0.79 | 1.94  | 0.04    | -0.57    | 0.26    |       |       |
| GENE1557X | 13625_s_at | 13625_s_at | 1     | 0.77  | -0.26   | -0.59    | 0.78    | -0.26 | -0.6  |
|           | 1.21       | -0.07      | -0.49 | 1.09  | 0.00976 | -0.56    | 0.31    |       |       |
| GENE1556X | 16761_at   | 16761_at   | 1     | 1.62  | -0.47   | -1.29    | 1.27    | -0.1  | -0.91 |
|           | 1.41       | -0.03      | -1.58 | 1.5   | 0       | -1.52    | 1.58    |       |       |
| GENE1555X | 12801_at   | 12801_at   | 1     | 1.02  | -0.9    | -2.23    | 1.1     | -0.07 | -0.91 |
|           | 1.68       | -0.39      | -1.26 | 1.79  | 0.17    | -0.59    | 1.13    |       |       |
| GENE1554X | 18967_s_at | 18967_s_at | 1     | 1.36  | -0.21   | -1.59    | 1.33    | 0     | -0.51 |
|           | 1.51       | -0.53      | -0.94 | 1.27  | -0.22   | -0.63    | 1.25    |       |       |
| GENE1553X | 17991_g_at | 17991_g_at | 1     | 1.08  | -0.3    | -1.74    | 0.94    | 0.03  | -0.76 |
|           | 1.31       | -0.59      | -1.29 | 1.07  | -0.45   | -0.97    | 0.87    |       |       |

|           |            |             |       |       |       |       |      |       |       |
|-----------|------------|-------------|-------|-------|-------|-------|------|-------|-------|
| GENE1552X | 16151_at   | 16151_at    | 1     | 0.37  | 0.1   | -1.05 | 0.21 | -0.13 | -0.64 |
|           | 0.97       | -0.05 -0.9  | 1.31  | 0.07  | -1.11 | 0.33  |      |       |       |
| GENE1551X | 20590_at   | 20590_at    | 1     | 0.88  | -1.01 | -1.86 | 0.68 | -0.28 | -0.88 |
|           | 1.15       | -0.3 -1.32  | 1.58  | -0.02 | -1.4  | 0.35  |      |       |       |
| GENE1550X | 12816_at   | 12816_at    | 1     | 0.41  | -0.88 | -2    | 0.92 | 0.33  | -0.42 |
|           | 0.89       | -0.33 -1.05 | 1.28  | 0.41  | -0.43 | -0.15 |      |       |       |
| GENE1549X | 12790_s_at | 12790_s_at  | 1     | 0.43  | -0.37 | -2.75 | 0.75 | 0.31  | -1.15 |
|           | 1.84       | -0.71 -1.4  | 1.91  | -0.03 | -0.38 | -0.25 |      |       |       |
| GENE1548X | 13900_s_at | 13900_s_at  | 1     | 1.44  | 0.14  | -2.07 | 1.39 | 0.89  | -0.48 |
|           | 1.85       | -0.26 -1.05 | 1.26  | -0.34 | -0.44 | -0.15 |      |       |       |
| GENE1547X | 13539_i_at | 13539_i_at  | 1     | 1.44  | -0.06 | -1.63 | 1.14 | 0.66  | -0.89 |
|           | 1.81       | -0.81 -1.16 | 1.27  | -0.65 | -0.45 | -0.34 |      |       |       |
| GENE1546X | 20701_s_at | 20701_s_at  | 1     | 0.64  | -0.25 | -0.97 | 1.07 | 0.23  | -0.7  |
|           | 0.83       | 0.1 -1.17   | 0.64  | 0.33  | -1.07 | 0.24  |      |       |       |
| GENE1545X | 18844_at   | 18844_at    | 1     | 0.61  | 0.06  | -1.08 | 1.01 | 0.57  | -0.45 |
|           | 0.93       | -0.28 -1.39 | 0.86  | 0     | -1.24 | 0.24  |      |       |       |
| GENE1544X | 14751_at   | 14751_at    | 1     | 1.51  | 0.28  | -1.42 | 1.52 | 0.52  | -1.1  |
|           | 1.44       | -0.13 -1.13 | 1.47  | -0.27 | -1.78 | 0.21  |      |       |       |
| GENE1543X | 11998_at   | 11998_at    | 1     | 0.86  | 0.83  | -1.01 | 1.09 | 0.9   | -0.98 |
|           | 1.11       | -0.31 -1.87 | 0.49  | -0.07 | -0.95 | 0.35  |      |       |       |
| GENE1542X | 18328_at   | 18328_at    | 1     | 1.32  | 0.56  | -1.61 | 1.38 | 0.31  | -1.56 |
|           | 0.98       | -0.79 -2.58 | 1.23  | -0.57 | -1.91 | 0.16  |      |       |       |
| GENE1541X | 19696_at   | 19696_at    | 1     | 1.16  | 0.06  | -1.37 | 1.31 | 0.75  | -1.11 |
|           | 1.02       | -0.55 -2.11 | 1.26  | -0.21 | -1.89 | -2.07 |      |       |       |
| GENE1540X | 20089_at   | 20089_at    | 1     | 1.22  | 0.5   | -0.78 | 1.02 | 0.47  | -0.47 |
|           | 0.87       | -0.7 -1.33  | 1.1   | -0.43 | -1.33 | -1    |      |       |       |
| GENE1539X | 20629_at   | 20629_at    | 1     | 0.52  | 0.14  | -0.36 | 0.55 | -0.01 | -0.33 |
|           | 0.26       | -0.19 -1.11 | 0.28  | -0.43 | -0.95 | -0.4  |      |       |       |
| GENE1538X | 13432_at   | 13432_at    | 1     | 1.3   | -0.24 | -1.09 | 0.81 | -0.04 | -0.3  |
|           | 0.91       | -0.29 -1.42 | 0.59  | -0.47 | -1.27 | -0.05 |      |       |       |
| GENE1537X | 19458_at   | 19458_at    | 1     | 0.6   | 0.73  | -1.07 | 0.76 | 0.53  | -1.02 |
|           | 0.33       | 0.03 -0.83  | 0.54  | -0.46 | -0.74 | -0.87 |      |       |       |
| GENE1536X | 18618_s_at | 18618_s_at  | 1     | 0.68  | 0     | -0.9  | 0.72 | 0.04  | -1.21 |
|           | 0.59       | 0.2 -0.95   | 0.65  | -1.09 | -0.39 | -0.94 |      |       |       |
| GENE1535X | 20282_at   | 20282_at    | 1     | 0.63  | -0.19 | -1.2  | 0.47 | 0.14  | -0.78 |
|           | 0.47       | -0.62 -1.76 | 0.17  | -0.14 | -1.12 | -0.37 |      |       |       |
| GENE1534X | 20232_s_at | 20232_s_at  | 1     | 1.07  | -0.41 | -1.45 | 0.55 | -0.44 | -0.93 |
|           | 0.3        | -0.8 -2.55  | 0.43  | -0.97 | -2.06 | -0.44 |      |       |       |
| GENE1533X | 16113_s_at | 16113_s_at  | 1     | 1.26  | -0.67 | -3.63 | 0    | -0.67 | -2.63 |
|           | 1.37       | -0.67 -3.63 | 0.84  | -0.67 | -3.63 | 0     |      |       |       |
| GENE1532X | 18270_at   | 18270_at    | 1     | 0.33  | -0.95 | -2.47 | 1    | -0.11 | -2.31 |
|           | 0.62       | -1.35 -2.27 | 1.2   | -0.76 | -1.99 | -0.74 |      |       |       |
| GENE1531X | 12577_at   | 12577_at    | 1     | 0.56  | -1.37 | -2.92 | 1.37 | -0.47 | -1.92 |
|           | 0.67       | -1.58 -2.44 | 1.68  | -0.96 | -2.92 | -1.58 |      |       |       |
| GENE1530X | 20372_at   | 20372_at    | 1     | 1.02  | -0.69 | -3.68 | 1.02 | 0.73  | -2.1  |
|           | 1.69       | -1.72 -3.36 | 1.87  | -1.51 | -3.68 | -1.12 |      |       |       |
| GENE1529X | 18048_at   | 18048_at    | 1     | 0.73  | -0.19 | -1.12 | 0.56 | -0.35 | -0.85 |
|           | 0.5        | -0.46 -0.85 | 0.69  | -0.8  | -1.3  | -0.88 |      |       |       |
| GENE1528X | 14947_at   | 14947_at    | 1     | 0.46  | -0.62 | -1.69 | 0.88 | -0.68 | -0.84 |
|           | 1.03       | -1.07 -1.54 | 0.69  | -1.23 | -0.83 | -1.11 |      |       |       |
| GENE2350X | 19177_at   | 19177_at    | 1     | 0.32  | 0.8   | -0.14 | 0.52 | 1.28  | 0.3   |
|           | 0.65       | 0.98 -0.3   | 0.34  | 0.37  | -0.8  | -1.09 |      |       |       |
| GENE1436X | 17388_at   | 17388_at    | 1     | 0.38  | 0.39  | 0.1   | 0.09 | 0.49  | -0.01 |
|           | 0.19       | 0.39 -0.31  | 0.03  | 0.1   | -0.64 | -1.15 |      |       |       |
| GENE1435X | 15868_at   | 15868_at    | 1     | 0.6   | 1.19  | 1.16  | 0.36 | 0.87  | 0.45  |
|           | 0.1        | 0.42 -0.51  | -0.01 | -0.41 | -1.28 | -2    |      |       |       |

|           |            |             |          |       |       |       |       |       |       |   |  |
|-----------|------------|-------------|----------|-------|-------|-------|-------|-------|-------|---|--|
| GENE1417X | 15896_at   | 15896_at    | 1        | -0.1  | 1.41  | -0.33 | 0.32  | 1.43  | -0.27 |   |  |
|           | 0.23       | -0.23 -0.46 | 0.19     | -0.58 | -0.61 | -0.76 |       |       |       |   |  |
| GENE1416X | 16660_at   | 16660_at    | 1        | -1.13 | 3.42  | -0.89 | 0.44  | -0.38 | -0.11 |   |  |
|           | 0.71       | -0.38 -0.24 | 0.34     | -1.28 | -0.89 | -1.13 |       |       |       |   |  |
| GENE1527X | 18235_at   | 18235_at    | 1        | -0.02 | 1.12  | -2.46 | -0.01 | 1.73  | -0.54 | - |  |
|           | 0.15       | 0.54 -4.05  | 0.25     | 1.39  | -2.2  | 0.41  |       |       |       |   |  |
| GENE1526X | 18187_at   | 18187_at    | 1        | 0.28  | 0.27  | -0.49 | 0.18  | 0.56  | -0.57 |   |  |
|           | 0.15       | 0.11 -1.18  | 0.01     | 0.19  | -0.78 | -0.77 |       |       |       |   |  |
| GENE1525X | 16654_at   | 16654_at    | 1        | 0.28  | 0.84  | -0.38 | 0.26  | 0.9   | -0.38 |   |  |
|           | 0.4        | 0.11 -1.66  | -0.45    | 0.05  | -1.49 | -0.43 |       |       |       |   |  |
| GENE1524X | 15638_s_at | 15638_s_at  | 1        | 1     | 1.41  | -1.32 | -0.11 | 1.73  | -0.81 |   |  |
|           | 1.5        | 1.11 -1.58  | 1.02     | 0.66  | -1.44 | -0.9  |       |       |       |   |  |
| GENE1523X | 19577_at   | 19577_at    | 1        | 1.2   | 1.41  | -2.48 | 0.63  | 1.32  | -2.48 |   |  |
|           | 0.99       | 0.41 -2.48  | 0.99     | 0     | -2.48 | 0     |       |       |       |   |  |
| GENE1522X | 17815_at   | 17815_at    | 1        | 0.4   | 0.95  | -1.26 | 0.4   | 0.66  | -1.31 |   |  |
|           | 0.34       | 0.79 -1.56  | 0.12     | -0.05 | -2.45 | -0.69 |       |       |       |   |  |
| GENE1512X | 12359_s_at | 12359_s_at  | 1        | -0.05 | 0.72  | -0.7  | -0.33 | 0.47  | -1.17 | - |  |
|           | 0.21       | 1 -0.8      | 0.2      | 0.68  | -0.8  | 0     |       |       |       |   |  |
| GENE1521X | 20585_at   | 20585_at    | 1        | -1.02 | 2.45  | 0.69  | -1.9  | 2.07  | -0.93 | - |  |
|           | 0.57       | 1.41 -1.55  | -1.49    | 1.12  | -4.03 | 0     |       |       |       |   |  |
| GENE1520X | 18665_r_at | 18665_r_at  | 1        | 0.31  | 1.37  | -0.04 | 0.04  | 0.82  | -0.7  |   |  |
|           | 0.15       | 0.98 -0.66  | -0.08    | 0.52  | -1.22 | -0.85 |       |       |       |   |  |
| GENE1519X | 18351_at   | 18351_at    | 1        | 0.1   | 1.57  | 0.78  | 0.08  | 1.06  | -0.07 |   |  |
|           | 0.18       | 0.78 -0.92  | -0.00716 |       | -0.31 | -3.03 | -1.39 |       |       |   |  |
| GENE1518X | 13782_at   | 13782_at    | 1        | -0.26 | 0.31  | -0.02 | -0.17 | 0.23  | -0.16 |   |  |
|           | 0.5        | -0.16 -1.14 | 0.45     | -0.24 | -1.09 | -0.13 |       |       |       |   |  |
| GENE1510X | 15443_at   | 15443_at    | 1        | -0.1  | 0     | -0.49 | 0.51  | 0.14  | -1.02 |   |  |
|           | 0.23       | 0.19 -0.97  | 0.47     | 0.09  | -1.49 | -0.55 |       |       |       |   |  |
| GENE1509X | 16491_at   | 16491_at    | 1        | 0.05  | -0.07 | -0.64 | 0.01  | 0     | -0.7  | - |  |
|           | 0.03       | 0.07 -0.86  | -0.07    | -0.32 | -1.05 | -0.15 |       |       |       |   |  |
| GENE1508X | 17480_at   | 17480_at    | 1        | 0.01  | 0.08  | -0.8  | -0.05 | 0     | -0.99 |   |  |
|           | 0.19       | -0.39 -1.77 | 0.45     | -0.57 | -1.99 | -0.18 |       |       |       |   |  |
| GENE1517X | 20482_at   | 20482_at    | 1        | 0.16  | 0.32  | -0.36 | -0.14 | 0.32  | -0.49 | - |  |
|           | 0.41       | 0.09 -0.95  | -0.04    | -0.28 | -1.43 | -0.08 |       |       |       |   |  |
| GENE1516X | 14095_s_at | 14095_s_at  | 1        | -0.06 | 0.65  | -0.26 | -0.23 | 0.78  | -0.16 | - |  |
|           | 0.51       | 0.12 -0.9   | -0.17    | -0.42 | -1.16 | -0.26 |       |       |       |   |  |
| GENE1515X | 15270_at   | 15270_at    | 1        | -0.01 | 0.75  | -0.02 | -0.06 | 0.32  | 0.04  | - |  |
|           | 0.18       | -0.37 -0.58 | -0.43    | -0.29 | -1.02 | -0.5  |       |       |       |   |  |
| GENE1514X | 12344_at   | 12344_at    | 1        | 0.49  | 0.52  | -0.26 | 0.38  | 0.61  | -0.23 |   |  |
|           | 0.19       | -0.2 -1.34  | 0.04     | -0.62 | -1.46 | -0.42 |       |       |       |   |  |
| GENE1513X | 12186_at   | 12186_at    | 1        | 0.32  | 0.57  | 0.29  | 0.14  | 0.86  | -0.03 | - |  |
|           | 0.19       | -0.45 -1.24 | 0.03     | -1.01 | -1.43 | -0.12 |       |       |       |   |  |
| GENE782X  | 18291_at   | 18291_at    | 1        | 0.31  | 0.04  | -0.31 | 0.22  | 0.4   | -0.09 | 0 |  |
|           | 0          | -0.36 -1.05 | -0.08    | -2.14 | -0.28 |       |       |       |       |   |  |
| GENE781X  | 20195_at   | 20195_at    | 1        | -0.2  | 0.25  | -0.2  | -0.66 | -0.16 | -0.69 | - |  |
|           | 0.44       | -0.07 -0.62 | -0.38    | -0.44 | -2.58 | -0.03 |       |       |       |   |  |
| GENE2550X | 15518_at   | 15518_at    | 1        | 0     | 0     | 1.58  | 0     | 0     | 1.84  | 0 |  |
|           | 0.84       | 2.26 1.37   | 1.37     | 3.53  | 5.98  |       |       |       |       |   |  |
| GENE2549X | 16383_at   | 16383_at    | 1        | -0.22 | 0.13  | 0     | 1     | 0     | 1.32  | - |  |
|           | 0.22       | 0.48 1.52   | 0.65     | 1.32  | 2.78  | 3.85  |       |       |       |   |  |
| GENE2548X | 12574_at   | 12574_at    | 1        | 0     | 0     | 1.26  | 0     | 0     | 0.48  | 0 |  |
|           | 0          | 2.72 0      | 1.37     | 4.71  | 6.22  |       |       |       |       |   |  |
| GENE2547X | 12332_s_at | 12332_s_at  | 1        | 0     | 0     | 0     | 0     | 0     | 0     | 0 |  |
|           | 1          | 2.84 0      | 0.67     | 3.74  | 5.46  |       |       |       |       |   |  |
| GENE2546X | 17356_at   | 17356_at    | 1        | 0     | 0     | 0     | 0.48  | 0     | 1.26  |   |  |
|           | 1.37       | 0 1.58      | 0        | 0     | 2.53  | 4.67  |       |       |       |   |  |



|           |            |            |       |       |       |       |       |       |       |   |
|-----------|------------|------------|-------|-------|-------|-------|-------|-------|-------|---|
| GENE2545X | 14719_s_at | 14719_s_at | 1     | -0.15 | -0.11 | 0.43  | 0.03  | -0.12 | 0.45  | - |
| 0.12      | 0.06       | 0.97       | 0.17  | 0.18  | 1.01  | 0.98  |       |       |       |   |
| GENE2544X | 15542_r_at | 15542_r_at | 1     | 0     | 0     | 1.48  | 0     | 0     | 0.48  | 0 |
| 0         | 2.32       | 0          | 0     | 2.43  | 3.3   |       |       |       |       |   |
| GENE2543X | 16859_at   | 16859_at   | 1     | 0     | 0     | 1.26  | 0     | 0     | 1.13  | 0 |
| 0.26      | 1.76       | 0          | 0     | 1.26  | 3.01  |       |       |       |       |   |
| GENE1747X | 16161_s_at | 16161_s_at | 1     | -0.02 | 0.27  | 0.05  | -0.38 | -0.01 | -0.27 | - |
| 0.1       | 0.34       | 0.25       | 0.06  | 0.28  | 0.85  | 1.53  |       |       |       |   |
| GENE1745X | 19019_i_at | 19019_i_at | 1     | 0     | 0     | 0     | 0     | 0     | 0     | 0 |
| 0         | 0          | 0          | 0     | 2.67  | 5.33  |       |       |       |       |   |
| GENE1744X | 20370_at   | 20370_at   | 1     | 0     | 0     | 0     | 0     | 0     | 0     | 0 |
| 0         | 1.13       | 0          | 0     | 2.13  | 4.93  |       |       |       |       |   |
| GENE1739X | 16108_s_at | 16108_s_at | 1     | -0.51 | -0.13 | -0.3  | -0.07 | 0.08  | 0.19  | - |
| 0.64      | -0.13      | 0.26       | 0.03  | 0.9   | 1.5   | 3.04  |       |       |       |   |
| GENE1738X | 14779_at   | 14779_at   | 1     | -0.36 | -0.18 | -0.25 | -0.18 | -0.02 | 0.12  | - |
| 0.63      | -0.12      | 1.03       | -0.28 | 0.6   | 1.22  | 1.97  |       |       |       |   |
| GENE1737X | 19366_at   | 19366_at   | 1     | -0.2  | -0.6  | -0.08 | -0.2  | -0.11 | 0.39  | - |
| 0.03      | 0.00571    | 0.59       | -0.03 | 0.37  | 0.77  | 1.2   |       |       |       |   |
| GENE1736X | 18652_at   | 18652_at   | 1     | -0.3  | -0.19 | 0.11  | -0.17 | -0.12 | 0.36  | - |
| 0.2       | 0.24       | 0.17       | -0.11 | 0.39  | 0.18  | 1.15  |       |       |       |   |
| GENE1735X | 12743_g_at | 12743_g_at | 1     | 0.01  | -0.11 | 0.26  | -0.2  | -0.03 | 0.2   | - |
| 0.01      | 0.17       | 0.35       | -0.1  | 0.14  | 0.34  | 1.56  |       |       |       |   |
| GENE1743X | 12705_f_at | 12705_f_at | 1     | 0.07  | -0.43 | 0.22  | -0.42 | -0.61 | -0.17 |   |
| 0.07      | -0.43      | 0.62       | -0.33 | -0.2  | 0.89  | 1.22  |       |       |       |   |
| GENE1676X | 19409_at   | 19409_at   | 1     | 0.44  | -0.98 | -0.03 | 0.42  | -0.4  | 0.03  |   |
| 0.09      | -0.07      | 0.39       | 0.36  | -0.45 | 1.19  | 1.76  |       |       |       |   |
| GENE1746X | 12776_at   | 12776_at   | 1     | -0.19 | 0.08  | 0.19  | -0.33 | -0.04 | -0.43 | - |
| 0.31      | 0.14       | 0.34       | -0.39 | -0.07 | 0.6   | 1.53  |       |       |       |   |
| GENE1697X | 13680_at   | 13680_at   | 1     | -0.46 | -0.04 | -0.05 | -0.88 | -0.79 | -1.38 | - |
| 0.86      | -0.72      | 0.57       | -0.88 | -0.97 | 0.93  | 2.47  |       |       |       |   |
| GENE1698X | 18735_s_at | 18735_s_at | 1     | -0.49 | 0.08  | -0.16 | -0.49 | -0.13 | -0.24 | - |
| 0.51      | -0.52      | -0.14      | -0.78 | -0.08 | 0.34  | 1.3   |       |       |       |   |
| GENE1702X | 16596_at   | 16596_at   | 1     | -0.22 | -0.27 | -0.21 | 0.04  | -0.24 | -0.34 | - |
| 0.39      | 0.14       | -0.23      | -0.39 | 0.45  | -0.01 | 1.13  |       |       |       |   |
| GENE1701X | 15613_s_at | 15613_s_at | 1     | -0.11 | -0.32 | -0.58 | -0.58 | -0.23 | 0     | - |
| 0.58      | 0.48       | -0.12      | -0.36 | 0.07  | 0.45  | 1.37  |       |       |       |   |
| GENE1696X | 13067_s_at | 13067_s_at | 1     | 0.22  | -0.01 | -0.26 | -0.28 | 0.75  | 0.86  |   |
| 0.13      | -0.27      | 0.08       | -0.29 | 0.37  | 0.64  | 1.89  |       |       |       |   |
| GENE1695X | 17398_at   | 17398_at   | 1     | 0.13  | -0.31 | -0.34 | -0.46 | 0.37  | 0.9   | - |
| 0.06      | -0.17      | 0.49       | -0.55 | 0.34  | 1.16  | 1.63  |       |       |       |   |
| GENE1694X | 16311_at   | 16311_at   | 1     | 0.05  | -1    | -0.63 | 0.08  | 0.47  | 0.56  |   |
| 0.42      | -0.36      | 0.33       | -0.36 | 0.56  | 1.31  | 2     |       |       |       |   |
| GENE1693X | 15172_s_at | 15172_s_at | 1     | 0.05  | -0.52 | -0.53 | -0.04 | 0.15  | 0.57  |   |
| 0.28      | -0.08      | 0.2        | -0.06 | 0.55  | 0.87  | 2.22  |       |       |       |   |
| GENE1692X | 17473_at   | 17473_at   | 1     | 0.34  | -0.83 | -0.39 | 0.21  | 0.13  | 0.62  |   |
| 0.38      | -0.53      | 0.33       | 0.32  | 0.2   | 0.87  | 1.7   |       |       |       |   |
| GENE1691X | 15654_at   | 15654_at   | 1     | -0.03 | -0.8  | -0.85 | 0.02  | -0.05 | 0.31  | - |
| 0.1       | -0.79      | -0.21      | -0.16 | 0.11  | 0.41  | 1.36  |       |       |       |   |
| GENE1690X | 14078_at   | 14078_at   | 1     | -0.03 | -0.73 | -0.73 | 0.06  | -0.04 | 0.39  |   |
| 0.06      | -0.49      | 0.09       | -0.1  | 0.1   | 0.66  | 1.37  |       |       |       |   |
| GENE1689X | 17945_at   | 17945_at   | 1     | 0     | 0     | 0.26  | 0     | 0     | 1.58  | 0 |
| 0         | 0          | 0          | 0     | 0     | 3.7   |       |       |       |       |   |
| GENE1688X | 16810_at   | 16810_at   | 1     | 0     | 0     | 0     | 0     | 0     | 0     | 0 |
| 0         | 0          | 0          | 0     | 0.48  | 4.08  |       |       |       |       |   |
| GENE1687X | 16914_s_at | 16914_s_at | 1     | 0     | 0     | 0     | 0     | 0     | 0     | 0 |
| 0         | 0          | 0          | 0     | 0     | 8.62  |       |       |       |       |   |

|           |            |            |       |       |          |       |       |       |       |   |   |
|-----------|------------|------------|-------|-------|----------|-------|-------|-------|-------|---|---|
| GENE1686X | 16461_i_at | 16461_i_at | 1     | 0     | 0        | 0     | 0     | 0     | 0     | 0 | 0 |
| 0         | 0          | 0          | 0     | 0     | 4.17     |       |       |       |       |   |   |
| GENE1685X | 12400_at   | 12400_at   | 1     | 0     | 0        | 0     | 0     | 0     | 0     | 0 | 0 |
| 0         | 0          | 0          | 0     | 0     | 3.9      |       |       |       |       |   |   |
| GENE1684X | 16865_s_at | 16865_s_at | 1     | 0     | 0        | 0     | 0     | 0     | 0     | 0 | 0 |
| 0         | 0          | 0          | 0     | 0     | 3.86     |       |       |       |       |   |   |
| GENE1683X | 17893_at   | 17893_at   | 1     | 0     | 0        | 0     | 0.84  | 0     | 0     | 0 | 0 |
| 0         | 0          | 0          | 0     | 0     | 4.08     |       |       |       |       |   |   |
| GENE1682X | 12475_at   | 12475_at   | 1     | 0     | 0        | 0     | 0.67  | 0     | 0     | 0 | 0 |
| 0         | 0.67       | 0          | 0     | 0.84  | 3.58     |       |       |       |       |   |   |
| GENE1681X | 20348_at   | 20348_at   | 1     | 0.73  | -0.26    | 0.32  | 1     | -0.26 | 0.8   |   |   |
| 0.41      | -0.26      | 0.16       | 0.58  | -0.26 | 1.8      | 7.98  |       |       |       |   |   |
| GENE1680X | 20133_i_at | 20133_i_at | 1     | 0.17  | -0.95    | -0.04 | 0.38  | -0.45 | 0.47  |   |   |
| 0.12      | -0.72      | 0.04       | 0.23  | -0.18 | 0.43     | 2.93  |       |       |       |   |   |
| GENE1679X | 13147_at   | 13147_at   | 1     | 0.29  | -0.31    | -0.45 | -0.07 | -0.1  | 0.14  | - |   |
| 0.05      | 0          | -0.12      | 0.1   | -0.16 | -0.00782 | 1.23  |       |       |       |   |   |
| GENE1780X | 15124_s_at | 15124_s_at | 1     | -0.07 | 1.94     | 0.44  | -0.16 | 1.94  | -1.63 | - |   |
| 0.22      | 2.46       | 0.91       | 1.23  | 3.33  | 1.37     | 2.37  |       |       |       |   |   |
| GENE1779X | 18185_at   | 18185_at   | 1     | -0.15 | 0.66     | 0.18  | -0.65 | 0.44  | -0.15 | - |   |
| 0.15      | 1          | 0.38       | 0.09  | 1.24  | 0.38     | 0.65  |       |       |       |   |   |
| GENE1778X | 18182_s_at | 18182_s_at | 1     | -0.05 | 0.84     | -0.22 | -1.68 | 1.22  | -0.16 | - |   |
| 0.1       | 1.37       | -0.16      | -0.39 | 1.79  | 0.61     | 2.08  |       |       |       |   |   |
| GENE1777X | 17589_at   | 17589_at   | 1     | -0.03 | 0.68     | -0.76 | -0.81 | 0.74  | -0.25 |   |   |
| 0.4       | 1.21       | -0.13      | 0.31  | 1.56  | 0.3      | 2.13  |       |       |       |   |   |
| GENE1776X | 12960_g_at | 12960_g_at | 1     | -0.1  | 0.45     | -0.49 | -0.71 | 0.39  | -0.35 | - |   |
| 0.16      | 1.33       | -0.03      | -0.34 | 1.45  | 0.25     | 0.73  |       |       |       |   |   |
| GENE1775X | 17366_at   | 17366_at   | 1     | -0.37 | -0.31    | 0.07  | -0.22 | 1.86  | 0.17  | - |   |
| 0.32      | 1.06       | 0.19       | 0.29  | 0.92  | 0.32     | 0.56  |       |       |       |   |   |
| GENE1774X | 20027_at   | 20027_at   | 1     | -0.27 | 0.67     | 0.29  | -0.73 | 0.49  | 0.79  | - |   |
| 1.64      | 1.41       | 0.75       | -1.7  | 1.37  | 0.68     | 1.37  |       |       |       |   |   |
| GENE1773X | 16031_at   | 16031_at   | 1     | -0.99 | 0.87     | 0.36  | -1.09 | 0.77  | -0.07 | - |   |
| 1.62      | 2.07       | 1.67       | -1.17 | 1.92  | 1.81     | 5.49  |       |       |       |   |   |
| GENE1772X | 18348_at   | 18348_at   | 1     | -0.33 | 0.34     | 0.61  | -0.4  | 0.5   | 0.53  | - |   |
| 0.58      | 0.88       | 0.87       | -0.89 | 0.74  | 0.63     | 2.05  |       |       |       |   |   |
| GENE1771X | 17636_at   | 17636_at   | 1     | -0.71 | 0.54     | 0.55  | -0.63 | 0.45  | 0.27  | - |   |
| 0.71      | 0.72       | 0.39       | -1    | 1.08  | 0.33     | 1.48  |       |       |       |   |   |
| GENE1770X | 18587_s_at | 18587_s_at | 1     | -0.58 | 1.11     | 0.44  | -1.2  | 0.73  | 0.03  | - |   |
| 1.1       | 1.15       | 0.36       | -1.2  | 1.04  | 0.25     | 3.22  |       |       |       |   |   |
| GENE1769X | 15674_at   | 15674_at   | 1     | -0.49 | 1.77     | 1.11  | -1.06 | 1.44  | 0.58  | - |   |
| 1.14      | 1.72       | 0.94       | -1.44 | 1.88  | 1.1      | 1.79  |       |       |       |   |   |
| GENE1768X | 18482_at   | 18482_at   | 1     | -1.09 | 2.08     | 1.66  | -0.96 | 2.24  | 1.42  | - |   |
| 0.96      | 2.11       | 1.46       | -1.09 | 1.62  | 1.31     | 1.83  |       |       |       |   |   |
| GENE1767X | 15406_at   | 15406_at   | 1     | 0.18  | 2.8      | 1.63  | -1    | 2.3   | 1.06  | - |   |
| 0.21      | 1.46       | 0.71       | -1.36 | 1.19  | 0.68     | 2.62  |       |       |       |   |   |
| GENE1766X | 14240_s_at | 14240_s_at | 1     | -0.67 | 2.03     | 1.34  | -0.7  | 1.1   | -0.14 | - |   |
| 0.46      | 1.98       | 0.94       | -0.88 | 0.94  | 0.02     | 3.02  |       |       |       |   |   |
| GENE1765X | 14587_at   | 14587_at   | 1     | 0.05  | 0.45     | 0.47  | -0.23 | 0.52  | 0.23  | - |   |
| 0.1       | 0.98       | 0.31       | -0.26 | 0.52  | 0        | 1.23  |       |       |       |   |   |
| GENE1764X | 16611_at   | 16611_at   | 1     | -1.12 | 0.97     | 0.25  | -0.56 | 0.97  | 0.17  | - |   |
| 0.56      | 0.88       | -0.38      | -0.68 | 1.02  | -0.25    | 1.7   |       |       |       |   |   |
| GENE1760X | 17039_at   | 17039_at   | 1     | 0.17  | 1.06     | 0.05  | 0.06  | 0.72  | -0.77 |   |   |
| 0.38      | 0.96       | -0.08      | 0.56  | 0.23  | -0.77    | 1.93  |       |       |       |   |   |
| GENE1759X | 13145_at   | 13145_at   | 1     | 0.4   | 0.42     | 0.47  | 0.02  | 0.02  | -0.41 |   |   |
| 0.02      | 0.67       | 0.53       | -0.14 | -0.08 | -0.54    | 1.32  |       |       |       |   |   |
| GENE1709X | 16927_s_at | 16927_s_at | 1     | -0.23 | 0.52     | -0.1  | -0.23 | 0.25  | -0.27 | - |   |
| 0.3       | 0.83       | 0.36       | 0.29  | 0.8   | 0.22     | 2.88  |       |       |       |   |   |

|           |            |            |       |         |       |       |       |       |       |
|-----------|------------|------------|-------|---------|-------|-------|-------|-------|-------|
| GENE1708X | 16152_s_at | 16152_s_at | 1     | 0.00786 | 0.15  | 0.09  | -0.3  | 0.09  | -     |
| 0.03      | -0.26      | 0.39       | 0.16  | 0.03    | 0.11  | 0.16  | 1.06  |       |       |
| GENE1707X | 12941_g_at | 12941_g_at | 1     | 0.09    | 0.34  | 0.19  | -0.12 | -0.03 | -0.32 |
| 0.12      | 0.51       | 0.16       | 0     | 0.15    | -0.15 | 1.48  |       |       |       |
| GENE1706X | 17451_at   | 17451_at   | 1     | 0.18    | 1.1   | 0.13  | 0.3   | 0.71  | -0.25 |
| 0.11      | 0.35       | -0.12      | -0.7  | 0.38    | -0.28 | 2.76  |       |       |       |
| GENE1705X | 20263_at   | 20263_at   | 1     | -0.04   | 0.46  | -0.02 | -0.01 | 0.46  | 0     |
| 0.21      | 0.18       | -0.02      | -0.4  | 0.22    | -0.06 | 2.39  |       |       |       |
| GENE1704X | 13003_at   | 13003_at   | 1     | -0.33   | 0.88  | 0.39  | -0.57 | 0.55  | 0.22  |
| 0.93      | 0.58       | -0.35      | -0.57 | 0.28    | -0.27 | 2.71  |       |       |       |
| GENE1703X | 17452_g_at | 17452_g_at | 1     | -0.19   | 0.26  | 0.18  | -0.32 | -0.07 | -0.18 |
| 0.57      | -0.19      | 0.13       | -0.82 | 0.16    | -0.18 | 2.14  |       |       |       |
| GENE1791X | 12947_at   | 12947_at   | 1     | 0.81    | 0.67  | 1.86  | 0.36  | 0.16  | 1.34  |
| 0.16      | 0.09       | 0.51       | -0.07 | 0.13    | 0.97  | 0.75  |       |       |       |
| GENE1790X | 13134_s_at | 13134_s_at | 1     | -0.16   | 1.57  | 3.41  | -0.06 | 1.15  | 2.24  |
| 0.21      | 0.54       | 2.3        | -0.12 | 0.29    | 1.37  | 1.43  |       |       |       |
| GENE1789X | 15971_s_at | 15971_s_at | 1     | 0.06    | 1.4   | 3.18  | 0.08  | 0.81  | 2.29  |
| 0.07      | -0.39      | 2.25       | 0.31  | -0.34   | 1.35  | 1.12  |       |       |       |
| GENE1788X | 14613_at   | 14613_at   | 1     | 0.28    | 1.48  | 3.84  | 0.53  | 1.8   | 4     |
| 0.58      | -1         | 1          | -0.36 | -1      | 0.84  | 2.19  |       |       |       |
| GENE1793X | 19960_at   | 19960_at   | 1     | -0.16   | 1.17  | 1.6   | -0.12 | 0.82  | 1.47  |
| 0.34      | 0.13       | 0.77       | -0.51 | 0.04    | 0.89  | 1.13  |       |       |       |
| GENE1723X | 18636_at   | 18636_at   | 1     | -0.15   | 1.34  | 2     | -0.04 | 1.53  | 1.63  |
| 0.2       | -0.2       | 0.56       | -0.51 | 0.48    | 1.09  | 2.38  |       |       |       |
| GENE1726X | 12521_at   | 12521_at   | 1     | 0       | 1.35  | 1.78  | 0.13  | 2.32  | 3.42  |
| 1.07      | 0.22       | 1.32       | 0     | 0.78    | 1.61  | 2.72  |       |       |       |
| GENE1725X | 15052_at   | 15052_at   | 1     | 0.15    | 1.32  | 2.06  | -0.11 | 1.86  | 2.43  |
| 0.14      | 0.95       | 1.97       | 0.27  | 0.28    | 1.49  | 2.72  |       |       |       |
| GENE1728X | 16173_s_at | 16173_s_at | 1     | 0.16    | 1     | 4.02  | 0     | 1.47  | 4.2   |
| 0.32      | -0.16      | 3.78       | -0.67 | 1.15    | 3.61  | 5.96  |       |       |       |
| GENE1727X | 15161_s_at | 15161_s_at | 1     | 0.28    | 1.1   | 1.95  | -0.58 | 1.65  | 3.3   |
| 0.58      | 0.36       | 2.08       | 0     | 1       | 2.16  | 4.4   |       |       |       |
| GENE1724X | 12530_at   | 12530_at   | 1     | 0.26    | 1.67  | 2.37  | 0.58  | 1.13  | 2.53  |
| 0.32      | 0          | 1.37       | -0.73 | 0.48    | 2.26  | 4.19  |       |       |       |
| GENE1722X | 19383_at   | 19383_at   | 1     | -0.84   | 1     | 1.85  | -0.36 | 0.19  | 0.16  |
| 0.83      | -0.48      | 1.45       | 0     | 1       | 2     | 4.97  |       |       |       |
| GENE1721X | 15496_at   | 15496_at   | 1     | 0.05    | 0.43  | 2.39  | 0.07  | -0.18 | 0.03  |
| 0.32      | 0.5        | 1.2        | 0.33  | 0.5     | 0.71  | 2.71  |       |       |       |
| GENE1720X | 15532_r_at | 15532_r_at | 1     | 0.8     | 0.69  | 3.1   | 1     | 1     | 2.49  |
| 0.67      | 0.13       | 3.15       | 0.16  | 0.3     | 3.34  | 3.4   |       |       |       |
| GENE1719X | 12538_at   | 12538_at   | 1     | 0.3     | 0.86  | 1.81  | 0.19  | 0.54  | 1.74  |
| 0.16      | -0.53      | 1.74       | -0.08 | -0.31   | 1.46  | 1.8   |       |       |       |
| GENE1718X | 15073_at   | 15073_at   | 1     | -0.26   | 0.73  | 1.64  | -0.12 | 0.22  | 0.58  |
| 0.12      | 0          | 1.8        | -0.41 | -0.26   | 1.24  | 1.68  |       |       |       |
| GENE1717X | 15663_s_at | 15663_s_at | 1     | -0.37   | 0.05  | 0.76  | 0.18  | 0.18  | 0.58  |
| 0.02      | -0.23      | 0.12       | -0.32 | 0.11    | -0.08 | 1.06  |       |       |       |
| GENE1716X | 13395_at   | 13395_at   | 1     | 0       | 0.48  | 2.2   | 0     | 0.26  | 1.58  |
| 0         | 1          | 0          | 0     | 0.84    | 4.02  |       |       |       |       |
| GENE1715X | 20053_at   | 20053_at   | 1     | 0.37    | 0     | 1.47  | 0.48  | 0.24  | 1.22  |
| 0.15      | -0.13      | 0.83       | -0.32 | -1.13   | 0.53  | 3.29  |       |       |       |
| GENE1751X | 12216_at   | 12216_at   | 1     | -0.36   | -0.28 | 1.29  | -0.71 | 0.23  | 0.06  |
| 1.17      | 0.81       | 1.44       | -0.36 | 1.16    | 1.03  | 1.73  |       |       |       |
| GENE1750X | 16141_s_at | 16141_s_at | 1     | -0.36   | -0.1  | 0.55  | -0.32 | 0.09  | 0.32  |
| 0.49      | 0.3        | 0.66       | -0.1  | 0.17    | 0.47  | 1.19  |       |       |       |
| GENE1700X | 20658_s_at | 20658_s_at | 1     | -0.39   | 0.04  | 0.1   | -0.66 | -0.16 | -0.17 |
| 0.65      | -0.12      | 0.32       | -0.68 | 0.49    | 0.68  | 1.19  |       |       |       |

|           |            |            |       |       |       |       |       |       |       |   |
|-----------|------------|------------|-------|-------|-------|-------|-------|-------|-------|---|
| GENE1699X | 14735_s_at | 14735_s_at | 1     | -0.6  | 0.26  | 0.33  | -0.38 | -0.03 | -0.19 | - |
| 1.04      | 0.33       | 0.4        | -0.58 | 0.28  | 0.83  | 1.55  |       |       |       |   |
| GENE1714X | 15098_s_at | 15098_s_at | 1     | -0.35 | 0.91  | -0.1  | -0.27 | 0.54  | -0.21 | - |
| 1.17      | -0.1       | 0.42       | 0.32  | 1.01  | 1.22  | 2.4   |       |       |       |   |
| GENE1713X | 19226_g_at | 19226_g_at | 1     | -0.67 | 0.43  | 0.1   | 0     | 0.77  | 0.41  | - |
| 0.54      | 0.08       | 0.24       | 0.08  | 0.43  | 0.24  | 1.08  |       |       |       |   |
| GENE1712X | 16029_s_at | 16029_s_at | 1     | -0.53 | 0.19  | 0.44  | -0.33 | 0.09  | 0.54  | - |
| 0.7       | 0.16       | 0.22       | -0.69 | 0.24  | 0.54  | 1.25  |       |       |       |   |
| GENE1711X | 18266_at   | 18266_at   | 1     | -0.22 | 0     | 0.11  | -0.24 | 0.04  | 0.32  | - |
| 0.62      | -0.13      | 0.29       | -0.35 | -0.13 | 0.19  | 1.23  |       |       |       |   |
| GENE1710X | 19755_at   | 19755_at   | 1     | -0.54 | 0.1   | 0.08  | -0.32 | 0.02  | 0.85  | - |
| 1.04      | -0.05      | -0.41      | -0.35 | 0     | 0.72  | 1.18  |       |       |       |   |
| GENE1656X | 15058_s_at | 15058_s_at | 1     | -0.53 | 0.24  | 0.73  | -0.65 | 0.42  | 1.47  | - |
| 0.51      | 0.11       | 0.73       | -0.45 | -0.02 | 0.55  | 0.87  |       |       |       |   |
| GENE1655X | 13242_at   | 13242_at   | 1     | -0.35 | 0.09  | 0.81  | -0.41 | 0.35  | 1.64  | - |
| 0.2       | 0.16       | 0.65       | -0.29 | -0.12 | 0.71  | 1.01  |       |       |       |   |
| GENE1654X | 12930_at   | 12930_at   | 1     | -0.31 | 0.27  | 0.79  | -0.39 | 0.15  | 1.34  | - |
| 1.1       | 0.22       | 0.71       | -0.21 | -0.1  | 0.62  | 1.77  |       |       |       |   |
| GENE1653X | 14475_at   | 14475_at   | 1     | -0.52 | 0     | 0.82  | -0.71 | 0.43  | 2     | - |
| 1.08      | -0.86      | 1.46       | -0.41 | -0.49 | 1.38  | 2.45  |       |       |       |   |
| GENE1652X | 19692_at   | 19692_at   | 1     | 0.1   | 0.32  | 0.51  | -0.3  | 0.19  | 1.02  | - |
| 0.57      | 0.02       | 0.64       | -0.61 | -0.65 | 0.5   | 0.12  |       |       |       |   |
| GENE1651X | 14793_at   | 14793_at   | 1     | -0.45 | -0.35 | 0.77  | -0.21 | 0.2   | 1.39  | - |
| 0.13      | -0.6       | 0.11       | -0.17 | -0.75 | 0.27  | 0.96  |       |       |       |   |
| GENE1650X | 12369_at   | 12369_at   | 1     | -0.35 | 0.2   | 1.08  | 0.01  | -0.04 | 1.68  | - |
| 0.01      | -0.55      | 0.5        | 0.29  | -1.04 | 0.33  | 0.47  |       |       |       |   |
| GENE1649X | 16487_at   | 16487_at   | 1     | -0.6  | -0.35 | 0.35  | -0.36 | 0.09  | 0.94  | - |
| 0.91      | -1.05      | 0.31       | -0.07 | -0.77 | 0.54  | 0.77  |       |       |       |   |
| GENE1648X | 15523_s_at | 15523_s_at | 1     | -0.47 | 0.52  | 0.78  | -0.41 | 0.44  | 0.82  | - |
| 1.03      | -1.46      | 0.48       | -0.58 | -1.22 | 0.88  | 1.74  |       |       |       |   |
| GENE1647X | 12525_at   | 12525_at   | 1     | -0.48 | 0.92  | 1.07  | -0.37 | 1.4   | 0.82  | - |
| 0.08      | 0          | 0.41       | -0.12 | -0.23 | -0.15 | 1.33  |       |       |       |   |
| GENE1646X | 20118_at   | 20118_at   | 1     | -0.29 | 1.81  | 2.24  | -0.43 | 0.59  | 1.06  | - |
| 0.83      | -0.1       | 1.3        | -0.64 | -0.71 | 0.83  | 1.15  |       |       |       |   |
| GENE1645X | 20450_at   | 20450_at   | 1     | 0.35  | 0.81  | 1.17  | 0.12  | 0.42  | 0.47  | - |
| 0.14      | -0.59      | 0.54       | -0.58 | -1.23 | 0.01  | 0.79  |       |       |       |   |
| GENE1612X | 14573_at   | 14573_at   | 1     | -0.26 | 1.45  | 2.71  | -0.26 | 0.68  | 2.15  | - |
| 0.26      | -0.61      | 0.84       | -0.26 | -1.2  | -0.39 | -0.36 |       |       |       |   |
| GENE1611X | 15981_at   | 15981_at   | 1     | -0.52 | 2.31  | 3.03  | -0.88 | 1.61  | 2.53  | - |
| 0.78      | -0.71      | 0.2        | -0.46 | -1.3  | -1.85 | -0.7  |       |       |       |   |
| GENE1669X | 15636_at   | 15636_at   | 1     | -0.8  | 0.79  | 0.23  | -0.75 | 1.02  | 0.53  | - |
| 0.97      | 0.11       | -0.04      | -0.95 | 0.19  | 0.44  | 0.4   |       |       |       |   |
| GENE1668X | 13868_at   | 13868_at   | 1     | -0.76 | 0.48  | 0.37  | -0.42 | 0.64  | 0.53  | - |
| 0.76      | 0.44       | -0.23      | -1.03 | 0     | 0.2   | -0.12 |       |       |       |   |
| GENE1667X | 14252_f_at | 14252_f_at | 1     | -0.63 | 0.83  | 1.22  | -0.81 | -0.35 | 0.72  | - |
| 0.89      | 0.35       | 0.35       | -0.59 | 0.3   | 0.4   | 0.3   |       |       |       |   |
| GENE1666X | 14251_f_at | 14251_f_at | 1     | -0.84 | 0.52  | 1.37  | -0.81 | -0.29 | 1.22  | - |
| 1.06      | 0.07       | 0.39       | -0.72 | 0.03  | 0.57  | -0.34 |       |       |       |   |
| GENE1665X | 20582_s_at | 20582_s_at | 1     | -0.73 | 0.26  | 1.17  | -0.56 | 0.01  | 0.79  | - |
| 0.96      | 0.24       | 0.72       | -1.11 | 0.01  | 0.79  | 0.28  |       |       |       |   |
| GENE1664X | 18272_at   | 18272_at   | 1     | -1.32 | 0.23  | 1.11  | -0.62 | 0.64  | 0.75  | - |
| 1.29      | -0.12      | 0.53       | -0.33 | -0.3  | -0.05 | 0.58  |       |       |       |   |
| GENE1663X | 15018_at   | 15018_at   | 1     | -0.79 | 1.1   | 1.47  | -0.96 | 1.86  | 1.96  | - |
| 1.24      | 0.36       | 0.93       | -1.49 | -0.34 | -0.06 | 0.46  |       |       |       |   |
| GENE1662X | 16073_f_at | 16073_f_at | 1     | -0.84 | 2.7   | 3.32  | -2.84 | 2.7   | 3.17  | - |
| 2.84      | -0.15      | 0          | -1.71 | -1    | 0     | 1.69  |       |       |       |   |

|           |            |            |       |       |       |       |         |       |       |    |
|-----------|------------|------------|-------|-------|-------|-------|---------|-------|-------|----|
| GENE1661X | 20061_at   | 20061_at   | 1     | -1.23 | 0.82  | 1.44  | -1.56   | 0.58  | 0.34  | -  |
|           | 2.52       | -0.41      | 0.37  | -2.03 | -1.07 | -0.13 | 0.29    |       |       |    |
| GENE1660X | 13146_s_at | 13146_s_at | 1     | -0.43 | 0.23  | 0.87  | -0.64   | -0.22 | 0.09  | -  |
|           | 1.02       | -0.43      | 0.41  | -0.54 | -0.79 | -0.26 | 0.54    |       |       |    |
| GENE1659X | 12916_at   | 12916_at   | 1     | -0.98 | 0.53  | 1.63  | -1.09   | 0.3   | 1.24  | -  |
|           | 1.8        | -1.18      | -0.08 | -1.38 | -1.63 | -0.39 | 0.99    |       |       |    |
| GENE1658X | 12226_at   | 12226_at   | 1     | -0.78 | 0.09  | 0.8   | -0.48   | -0.55 | 0.5   | -  |
|           | 1.4        | 0.13       | 1.05  | -0.67 | -0.71 | 0.53  | 0.53    |       |       |    |
| GENE1657X | 16306_at   | 16306_at   | 1     | -1.26 | -0.27 | 0.5   | -1.12   | -0.36 | 0.17  | -  |
|           | 2.03       | -0.88      | 1.01  | -1.5  | -1.73 | 0.11  | 1.69    |       |       |    |
| GENE1670X | 12975_at   | 12975_at   | 1     | -0.5  | 0.03  | -0.5  | -0.27   | 0.23  | 0.37  | -  |
|           | 0.18       | 0.14       | -0.05 | -1.1  | -0.03 | 0.05  | 0.71    |       |       |    |
| GENE1675X | 20271_at   | 20271_at   | 1     | -0.85 | -0.54 | 0.38  | -1.05   | 0     | 0.72  | -  |
|           | 2.05       | -0.22      | 1.85  | -2.53 | 0.77  | 2.37  | 1.86    |       |       |    |
| GENE1674X | 15196_s_at | 15196_s_at | 1     | -1.36 | -1.22 | -0.04 | -1.27   | -1.25 | 0.38  | -  |
|           | 1.72       | -0.75      | 0.82  | -1.03 | 0.31  | 1.58  | 0.77    |       |       |    |
| GENE1673X | 18512_at   | 18512_at   | 1     | -1.03 | -0.19 | -0.04 | -1.28   | 0.26  | 0.16  | -  |
|           | 1.56       | 0.28       | 0.51  | -1.46 | 0.5   | 0.6   | 0.44    |       |       |    |
| GENE1672X | 17092_at   | 17092_at   | 1     | -0.58 | 0.3   | 0.5   | -1.35   | 0.15  | 0.24  | -  |
|           | 1.23       | 0.04       | 0.83  | -1.43 | 0.23  | 1.05  | 0.45    |       |       |    |
| GENE1671X | 15483_s_at | 15483_s_at | 1     | -1.44 | 0.12  | 0.11  | -1.6    | 0.04  | 0.16  | -  |
|           | 2.72       | -0.56      | 0.1   | -2.24 | 0     | 0.45  | 1.27    |       |       |    |
| GENE843X  | 16162_s_at | 16162_s_at | 1     | -0.48 | -0.03 | -0.1  | -1.21   | -0.39 | -0.38 | -  |
|           | 1.03       | 0.23       | 0.26  | -1.21 | 0.37  | 0.51  | -0.09   |       |       |    |
| GENE842X  | 12531_at   | 12531_at   | 1     | -0.62 | 0.23  | -0.28 | -1.15   | 0.18  | -0.06 | -  |
|           | 1.22       | 0.08       | -0.22 | -1.15 | 0.23  | 0.31  | -0.17   |       |       |    |
| GENE1485X | 14704_s_at | 14704_s_at | 1     | 0.2   | -0.35 | 0.14  | 0.34    | -0.58 | -0.03 | -  |
|           | 1.31       | -0.19      | -0.29 | 0.07  | -0.06 | -0.84 | 1.48    |       |       |    |
| GENE1484X | 15846_at   | 15846_at   | 1     | 0.28  | -0.49 | 0.13  | 0.4     | -0.42 | 0.13  | -  |
|           | 1.04       | -0.38      | -0.33 | -0.02 | -0.16 | -0.66 | 1.45    |       |       |    |
| GENE1483X | 14111_s_at | 14111_s_at | 1     | -0.36 | -0.68 | -0.52 | 0.31    | -0.55 | -0.5  | -  |
|           | 1.05       | -0.35      | -0.45 | -0.5  | -0.56 | -0.33 | 0.95    |       |       |    |
| GENE1482X | 19115_at   | 19115_at   | 1     | -0.34 | -0.36 | 0.04  | 0.05    | 0.1   | 0.04  | -1 |
|           | -0.5       | -0.37      | 0     | -0.75 | -0.27 | 1.11  |         |       |       |    |
| GENE1481X | 12858_at   | 12858_at   | 1     | -0.02 | -0.18 | -0.16 | -0.21   | -0.46 | -1.22 | -  |
|           | 0.46       | 0.3        | -0.36 | -0.2  | -0.2  | -0.74 | 0.63    |       |       |    |
| GENE1480X | 13292_at   | 13292_at   | 1     | -0.34 | -0.21 | -0.86 | -0.59   | -1.3  | -1.89 | -  |
|           | 1.04       | -0.84      | -1.86 | -0.86 | -1.84 | -2.58 | 2.96    |       |       |    |
| GENE1496X | 16541_s_at | 16541_s_at | 1     | 0.27  | 0.02  | -0.88 | 0.34    | 0.44  | -0.37 | -  |
|           | 0.09       | -0.07      | -1.09 | 0.6   | 0.53  | -0.72 | 1.94    |       |       |    |
| GENE1495X | 16204_at   | 16204_at   | 1     | 0.2   | -0.29 | -1.16 | 0.12    | 0.03  | -0.95 | -  |
|           | 0.16       | 0.2        | -0.96 | 0.33  | 0.32  | -0.48 | 0.77    |       |       |    |
| GENE1479X | 16453_s_at | 16453_s_at | 1     | -0.1  | -0.85 | -1.05 | 0.2     | -0.02 | -0.25 | -  |
|           | 0.11       | -0.61      | -0.7  | 0.03  | 0.18  | -0.38 | 0.6     |       |       |    |
| GENE1478X | 12419_at   | 12419_at   | 1     | -0.07 | -0.63 | -1.32 | -0.04   | -0.02 | -0.14 | -  |
|           | 0.02       | -1.06      | -1.28 | -0.02 | -0.21 | -0.76 | 0.69    |       |       |    |
| GENE1477X | 20499_at   | 20499_at   | 1     | 0.22  | -0.08 | -1.13 | -0.01   | 0.39  | -0.44 | -  |
|           | 0.4        | -0.87      | -1.11 | -0.47 | -0.3  | -0.7  | 0.47    |       |       |    |
| GENE1374X | 12617_s_at | 12617_s_at | 1     | -0.04 | -0.7  | -1.02 | -0.17   | 0.01  | -0.25 | -  |
|           | 0.02       | -0.2       | -0.35 | -0.05 | 0.27  | 0.07  | 0.42    |       |       |    |
| GENE1373X | 16448_g_at | 16448_g_at | 1     | 0.04  | -0.45 | -0.63 | -0.28   | 0.26  | 0.21  | -  |
|           | 0.08       | -0.64      | -0.28 | -0.55 | -0.12 | 0.26  | 1.26    |       |       |    |
| GENE1372X | 16447_at   | 16447_at   | 1     | 0.16  | -0.57 | -0.49 | 0.00425 |       | 0.3   | -  |
|           | 0.28       | -0.1       | -0.57 | -0.7  | -0.15 | -0.29 | 0.25    | 1.15  |       |    |
| GENE1053X | 14832_at   | 14832_at   | 1     | -1.89 | -0.11 | 0.12  | -1.83   | 0.66  | 0.82  | -  |
|           | 2.38       | -2.42      | -3.12 | -1.35 | -1.86 | -2.95 | 0.73    |       |       |    |

|           |            |            |       |       |       |          |       |       |          |   |
|-----------|------------|------------|-------|-------|-------|----------|-------|-------|----------|---|
| GENE858X  | 19193_at   | 19193_at   | 1     | -0.67 | -0.7  | -0.02    | -0.67 | 1.79  | 1.15     | - |
| 0.67      | -2.37      | -3.32      | -0.67 | -2.37 | -3.32 | 1.04     |       |       |          |   |
| GENE857X  | 17187_at   | 17187_at   | 1     | -0.66 | 0.84  | 1.14     | -0.76 | 0.62  | 0.91     | - |
| 1.33      | -2.39      | -1.81      | -0.8  | -2.4  | -2.8  | 2.12     |       |       |          |   |
| GENE868X  | 14121_at   | 14121_at   | 1     | -0.34 | 0.13  | -0.08    | -0.39 | 0.52  | 0.74     | - |
| 0.34      | -1.3       | -0.75      | -1.07 | -0.61 | -0.35 | 0.28     |       |       |          |   |
| GENE1054X | 16569_s_at | 16569_s_at | 1     | -0.89 | 0.15  | 0.35     | -0.61 | -0.45 | 0.12     | - |
| 0.97      | -1.63      | -1.24      | -0.26 | -1.32 | -1.35 | -0.00605 |       |       |          |   |
| GENE979X  | 16482_s_at | 16482_s_at | 1     | -0.21 | 0.03  | -0.23    | -0.41 | -0.34 | -0.00601 | - |
| -0.64     | -1.3       | -0.51      | -0.33 | -1.24 | -0.65 | 0.03     |       |       |          |   |
| GENE891X  | 20555_s_at | 20555_s_at | 1     | -0.21 | 0.25  | 0.21     | -0.42 | -0.87 | -0.08    | - |
| 0.93      | -1.27      | -0.89      | -0.79 | -1.42 | -0.62 | 0.64     |       |       |          |   |
| GENE867X  | 16459_s_at | 16459_s_at | 1     | -1.16 | 0.3   | 0.74     | -0.8  | 0.35  | 0.11     | - |
| 1.62      | -2.04      | -0.31      | -1.13 | -1.87 | -0.97 | 0.98     |       |       |          |   |
| GENE866X  | 14491_at   | 14491_at   | 1     | -0.86 | 0.36  | 0.82     | -0.65 | 0.53  | 0.54     | - |
| 1.47      | -2.19      | -0.54      | -0.49 | -2.04 | -1.31 | 0.45     |       |       |          |   |
| GENE865X  | 18024_s_at | 18024_s_at | 1     | -1.17 | 0.39  | -0.15    | -0.76 | 0.57  | 0.03     | - |
| 1.27      | -1.95      | -1.08      | -0.8  | -2.21 | -1.79 | 1.16     |       |       |          |   |
| GENE864X  | 20315_i_at | 20315_i_at | 1     | -1.27 | 0     | 0.5      | -1.12 | -0.04 | 0.4      | - |
| 2.04      | -2.67      | -1.25      | -1.95 | -2.41 | -1.49 | 0.54     |       |       |          |   |
| GENE863X  | 16126_s_at | 16126_s_at | 1     | -1.17 | 0.53  | 0.49     | -1.57 | 0.33  | 0.78     | - |
| 2.01      | -2.56      | -1.68      | -1.72 | -2.49 | -1.61 | -0.04    |       |       |          |   |
| GENE862X  | 12953_at   | 12953_at   | 1     | -1.22 | 0.66  | 0.98     | -1.89 | 0.49  | 0.77     | - |
| 2.33      | -4.49      | -2.07      | -2.97 | -4.17 | -3.44 | -0.29    |       |       |          |   |
| GENE861X  | 16629_at   | 16629_at   | 1     | -1.37 | 0.44  | 1.15     | -1.45 | 0.49  | 0.29     | - |
| 1.85      | -2.58      | -0.8       | -1.59 | -2.86 | -2.13 | -0.43    |       |       |          |   |
| GENE894X  | 14060_at   | 14060_at   | 1     | -0.47 | -0.32 | -0.26    | -0.78 | 0.08  | -0.26    | - |
| 0.96      | -0.95      | -0.36      | -0.78 | -1.04 | -1.11 | 1        |       |       |          |   |
| GENE893X  | 16296_at   | 16296_at   | 1     | -0.47 | -0.36 | -0.14    | -0.83 | -0.37 | -0.42    | - |
| 1.04      | -0.99      | -0.52      | -1.05 | -1.22 | -0.83 | 0.59     |       |       |          |   |
| GENE892X  | 18933_at   | 18933_at   | 1     | -0.79 | -0.51 | -0.24    | -0.66 | -1.2  | -0.79    | - |
| 1.56      | -1.4       | -0.37      | -1.56 | -2.16 | -1.17 | 1.85     |       |       |          |   |
| GENE890X  | 19700_s_at | 19700_s_at | 1     | -0.11 | 0.08  | 0.13     | -0.24 | -0.06 | -0.17    | - |
| 0.27      | -0.88      | -0.17      | -0.41 | -0.47 | -0.38 | 1.35     |       |       |          |   |
| GENE889X  | 14070_at   | 14070_at   | 1     | -0.45 | -0.43 | 0.41     | -0.6  | -0.38 | 0.72     | - |
| 0.41      | -1.48      | 0.02       | -0.47 | -1.75 | -0.24 | 1.4      |       |       |          |   |
| GENE888X  | 15522_i_at | 15522_i_at | 1     | -0.37 | 0.18  | 0.27     | -0.59 | 0.08  | 0.55     | - |
| 1.15      | -2.43      | -0.29      | -0.84 | -2.17 | 0.15  | 1.7      |       |       |          |   |
| GENE887X  | 15886_at   | 15886_at   | 1     | -0.49 | 0.14  | 0.12     | -0.61 | -0.01 | 0.49     | - |
| 1.3       | -2.52      | -0.29      | -0.11 | -2.2  | -0.14 | 1.56     |       |       |          |   |
| GENE886X  | 17319_at   | 17319_at   | 1     | -0.08 | -0.11 | -0.19    | -0.11 | -0.18 | 0.28     | - |
| 0.5       | -1.21      | -0.38      | -0.38 | -0.54 | -0.38 | 0.81     |       |       |          |   |
| GENE885X  | 15125_f_at | 15125_f_at | 1     | -1.25 | -0.95 | 0.67     | -0.36 | -0.7  | 0.49     | - |
| 1.42      | -2.91      | -1.21      | -0.81 | -2.77 | -1.78 | 2.17     |       |       |          |   |
| GENE884X  | 15141_s_at | 15141_s_at | 1     | -0.72 | -0.58 | 0.49     | -0.42 | -0.36 | 0.94     | - |
| 1.65      | -3.26      | -0.77      | -1.13 | -3.37 | -2.02 | 2.06     |       |       |          |   |
| GENE899X  | 12651_at   | 12651_at   | 1     | -0.4  | 0.24  | 0.28     | -0.07 | -0.24 | -0.33    | - |
| 0.31      | -0.13      | -0.27      | -1.02 | -0.85 | -0.59 | 0.12     |       |       |          |   |
| GENE898X  | 15109_s_at | 15109_s_at | 1     | 0.1   | 0.31  | 0.23     | -0.31 | -0.51 | -0.77    | - |
| 0.15      | -0.56      | -0.15      | -0.47 | -1.15 | -0.26 | 0.19     |       |       |          |   |
| GENE897X  | 16310_at   | 16310_at   | 1     | 0.19  | 1.22  | 1        | 0.66  | 0.21  | -0.29    | - |
| 0.01      | -0.71      | -0.86      | 0.15  | -1.47 | -1.41 | -0.31    |       |       |          |   |
| GENE896X  | 19373_at   | 19373_at   | 1     | -0.06 | 1.85  | 1.87     | -0.41 | 0.59  | -0.38    | - |
| 0.93      | -0.4       | -0.86      | -0.96 | -1.17 | -1.96 | 0.79     |       |       |          |   |
| GENE895X  | 16565_at   | 16565_at   | 1     | 0     | 1.2   | 1.69     | -0.39 | 0.35  | -0.78    | - |
| 0.9       | -0.28      | -0.86      | -0.92 | -2.05 | -2.78 | -1       |       |       |          |   |

|           |            |            |         |       |       |       |       |       |       |   |
|-----------|------------|------------|---------|-------|-------|-------|-------|-------|-------|---|
| GENE881X  | 12587_at   | 12587_at   | 1       | -0.35 | 1.15  | 1.2   | 0.17  | 0.04  | 0.41  | - |
| 0.93      | -1.2       | -0.26      | 0.17    | -1.58 | -0.73 | 0     |       |       |       |   |
| GENE883X  | 13812_at   | 13812_at   | 1       | 0.11  | 0     | 1.03  | 0.03  | 0.5   | 0.39  | - |
| 0.64      | -1.02      | -0.55      | -0.56   | -1.32 | -1    | 0.32  |       |       |       |   |
| GENE882X  | 20360_at   | 20360_at   | 1       | 0.28  | 0.56  | 0.93  | 0.07  | 0.09  | -0.04 | - |
| 0.37      | -0.74      | -0.17      | -0.46   | -1.5  | -0.94 | 0.4   |       |       |       |   |
| GENE859X  | 14574_at   | 14574_at   | 1       | 0.12  | 0.96  | 1.19  | -0.16 | 0.18  | 0.32  | - |
| 0.83      | -1.79      | -2         | -0.97   | -2.9  | -2.41 | -0.33 |       |       |       |   |
| GENE880X  | 12744_at   | 12744_at   | 1       | -0.41 | 0.8   | 1.93  | -0.01 | 0.28  | 1.12  | - |
| 0.6       | -1.39      | 0.39       | 0.19    | -1.52 | -0.49 | 1.62  |       |       |       |   |
| GENE879X  | 19442_at   | 19442_at   | 1       | 0     | 0.82  | 1.34  | -0.36 | 0.87  | 1.08  | - |
| 0.84      | -1.32      | -0.22      | -0.36   | -1.58 | -1.04 | 2.08  |       |       |       |   |
| GENE878X  | 20495_s_at | 20495_s_at | 1       | -0.1  | 0.66  | 1.55  | -0.01 | 0.72  | 1.13  | - |
| 0.49      | -1.67      | -0.3       | -0.14   | -1.67 | -0.7  | 0.6   |       |       |       |   |
| GENE877X  | 15574_s_at | 15574_s_at | 1       | -0.65 | -0.16 | 0.95  | -1.29 | -0.2  | 0.8   | - |
| 0.41      | -1.23      | -0.43      | -1.29   | -2.05 | -0.49 | 0.98  |       |       |       |   |
| GENE876X  | 17024_s_at | 17024_s_at | 1       | -0.41 | 0.71  | 2.6   | -0.72 | 0.23  | 1.01  | - |
| 1.49      | -1         | 0.03       | -1.47   | -1.89 | -1.33 | 0.14  |       |       |       |   |
| GENE875X  | 20227_s_at | 20227_s_at | 1       | -1.89 | 0.24  | 2     | -0.89 | 0.48  | 1.3   | - |
| 1.65      | -2.22      | -0.58      | -0.83   | -2.67 | -1.58 | -0.24 |       |       |       |   |
| GENE874X  | 19135_at   | 19135_at   | 1       | -0.6  | 0.38  | 1.85  | -1.09 | 1.11  | 2.3   | - |
| 1.3       | -2.55      | -0.13      | -1.19   | -3.74 | -0.96 | 0.13  |       |       |       |   |
| GENE873X  | 20650_i_at | 20650_i_at | 1       | 0.13  | 0.68  | 0.5   | -0.03 | 1.1   | 1.31  | - |
| 0.06      | -0.49      | -0.99      | -0.27   | -1.06 | -0.89 | 0.51  |       |       |       |   |
| GENE872X  | 17600_s_at | 17600_s_at | 1       | -0.14 | 0.85  | 0.8   | -0.3  | 0.71  | 0.76  | - |
| 0.03      | -0.92      | -0.92      | 0.15    | -1.08 | -1.38 | -0.07 |       |       |       |   |
| GENE871X  | 15750_at   | 15750_at   | 1       | -0.37 | 1.52  | 1.21  | -0.7  | 1.36  | 0.43  | - |
| 1.13      | -0.65      | -0.59      | -1.13   | -0.93 | -1.29 | 0.64  |       |       |       |   |
| GENE869X  | 12457_at   | 12457_at   | 1       | -0.9  | 1.63  | 2.23  | -1.5  | 1.32  | 1.35  | - |
| 2.08      | -0.9       | -0.87      | -1.87   | -1.83 | -2.05 | -0.22 |       |       |       |   |
| GENE825X  | 18583_at   | 18583_at   | 1       | -1.05 | 1.2   | 0.35  | -0.95 | 1     | 0.28  | - |
| 3.05      | -1.37      | -0.16      | -1.05   | 0.1   | -1    | 0.66  |       |       |       |   |
| GENE1783X | 20459_i_at | 20459_i_at | 1       | 0.33  | 0.06  | 1.01  | -0.13 | 0.06  | 0.42  | - |
| 0.18      | 0.02       | 1          | 0.09    | -0.27 | 0.8   | -0.08 |       |       |       |   |
| GENE1782X | 20362_at   | 20362_at   | 1       | 0.61  | -0.4  | 3.11  | 1.11  | -0.28 | 1.12  | - |
| 0.42      | -0.83      | 2.26       | 0.71    | -0.34 | 1     | -0.43 |       |       |       |   |
| GENE1781X | 17843_s_at | 17843_s_at | 1       | 0.58  | 1.07  | 3.94  | 0.13  | -0.36 | 0     | - |
| 0.37      | -0.84      | 2.63       | 0.26    | -1.36 | 2     | 1.61  |       |       |       |   |
| GENE1604X | 17580_at   | 17580_at   | 1       | -0.06 | 0.15  | 1.15  | -0.09 | -0.31 | 0.22  | - |
| 0.32      | -0.47      | 0.93       | -0.26   | -0.97 | 0.34  | -0.56 |       |       |       |   |
| GENE1603X | 17581_g_at | 17581_g_at | 1       | -0.4  | 0.11  | 3.34  | -0.54 | -0.42 | 1.9   | - |
| 0.73      | -0.72      | 2.57       | -0.59   | -1.28 | 1.39  | -0.97 |       |       |       |   |
| GENE1602X | 14298_g_at | 14298_g_at | 1       | -0.32 | 0.04  | 2.05  | -0.41 | -0.38 | 1.22  | - |
| 0.75      | -0.74      | 1.87       | -0.55   | -1.38 | 0.87  | -0.87 |       |       |       |   |
| GENE1400X | 19927_at   | 19927_at   | 1       | -0.22 | -0.31 | 1.07  | -0.18 | 0.11  | 0.18  | - |
| 0.14      | -0.36      | 0.64       | -0.1    | -0.36 | -0.35 | 0.13  |       |       |       |   |
| GENE1624X | 13140_at   | 13140_at   | 1       | 0.05  | 0.75  | 1.01  | -0.22 | -0.02 | -0.05 | - |
| 0.08      | 0.26       | 0.39       | 0.00268 | -0.41 | -0.08 | -0.59 |       |       |       |   |
| GENE1623X | 12428_at   | 12428_at   | 1       | 0.51  | 0.16  | 1.14  | 0.35  | -0.49 | 0     | - |
| 0.2       | 0.13       | 0.42       | 0.29    | -0.77 | -0.15 | -0.37 |       |       |       |   |
| GENE1625X | 18750_f_at | 18750_f_at | 1       | 1.22  | 0.32  | 0.74  | 0.79  | -0.25 | -0.43 | - |
| 0.11      | 0.03       | 0.77       | -1.05   | -0.17 | 0.5   | -0.1  |       |       |       |   |
| GENE1631X | 18102_at   | 18102_at   | 1       | 0.12  | 0.86  | 1.13  | -1.83 | -0.37 | -0.3  | - |
| 0.04      | 0.71       | 0.42       | -0.47   | 0.66  | 0.15  | -0.37 |       |       |       |   |
| GENE1630X | 20081_at   | 20081_at   | 1       | -0.45 | 0.64  | 1.03  | -0.88 | 0.21  | -0.27 | - |
| 0.81      | 1.13       | 0.47       | -0.96   | 0.6   | 0.43  | -1.29 |       |       |       |   |

|           |            |            |   |          |          |       |       |       |       |   |
|-----------|------------|------------|---|----------|----------|-------|-------|-------|-------|---|
| GENE1629X | 16911_at   | 16911_at   | 1 | -0.37    | 2.07     | 1.71  | -1.17 | 0.84  | 0.51  | - |
|           | 2.23       | 0          |   | -0.48    | -1.53    | 0     | -0.48 | -0.48 |       |   |
| GENE1628X | 18484_at   | 18484_at   | 1 | -0.27    | 1.04     | 1.45  | -0.58 | 0.31  | 0.11  | - |
|           | 0.7        | 0.46       |   | 0.66     | -1.04    | -0.36 | -0.18 | -0.28 |       |   |
| GENE1627X | 18259_s_at | 18259_s_at | 1 | -0.14    | 1.16     | 1.23  | -0.92 | 0.8   | 0.48  | - |
|           | 0.44       | 0.35       |   | 0.01     | -0.56    | -0.4  | -0.37 | 0.09  |       |   |
| GENE1626X | 18289_at   | 18289_at   | 1 | -0.22    | 1.29     | 1.26  | -1.51 | 0.15  | 0.26  | - |
|           | 0.48       | 0.15       |   | 0        | -2.39    | -0.84 | 0     | -0.58 |       |   |
| GENE1633X | 20299_at   | 20299_at   | 1 | 0.14     | 0.37     | 0.35  | -0.29 | 0.6   | -0.29 | - |
|           | 0.81       | 1.08       |   | 0.3      | -0.96    | 0.03  | -0.24 | -0.7  |       |   |
| GENE1632X | 20300_g_at | 20300_g_at | 1 | 0.5      | 0.34     | 0.56  | 0.23  | 0.34  | -0.18 | - |
|           | 0.32       | 1.18       |   | 0.54     | -0.74    | -0.04 | -0.05 | -0.82 |       |   |
| GENE1617X | 15053_at   | 15053_at   | 1 | -0.48    | 1        | 1.91  | -0.88 | 0.73  | 1.69  | - |
|           | 0.97       | 1.22       |   | 0.46     | -1.45    | 0.07  | 0.75  | -1.16 |       |   |
| GENE1616X | 20042_at   | 20042_at   | 1 | -0.08    | 0.51     | 1.19  | -0.11 | 0.95  | 1.13  | - |
|           | 0.43       | 0.37       |   | 0.63     | -0.8     | -0.81 | 0.29  | -0.65 |       |   |
| GENE1615X | 17322_at   | 17322_at   | 1 | -0.45    | 1.05     | 1.02  | -0.35 | 1.37  | 1.15  | - |
|           | 0.36       | 0.35       |   | 0.26     | -0.98    | -0.41 | -0.7  | -1.17 |       |   |
| GENE797X  | 19830_at   | 19830_at   | 1 | -0.16    | 0.09     | 0.36  | -0.16 | 0.3   | 0.72  | - |
|           | 0.48       | -0.07      |   | -0.16    | -0.53    | -0.15 | 0.24  | -1.16 |       |   |
| GENE1622X | 13225_s_at | 13225_s_at | 1 | -0.49    | 0.24     | 0.89  | -0.31 | 0.96  | 1.47  | - |
|           | 0.33       | -0.33      |   | 0.31     | -0.11    | -0.01 | -0.28 | -1.82 |       |   |
| GENE1621X | 15997_s_at | 15997_s_at | 1 | -0.34    | -0.1     | 1     | 0.23  | 0.66  | 1.63  | - |
|           | 0.07       | -0.64      |   | 0.16     | 0.19     | -0.06 | -0.68 | -1.8  |       |   |
| GENE1620X | 15103_s_at | 15103_s_at | 1 | 0.37     | 0.8      | 1.4   | 0.46  | 0.98  | 1.65  | - |
|           | 0.4        | 0.02       |   | 0.02     | 0.51     | 0.23  | 0.06  | -0.07 | -1.73 |   |
| GENE1619X | 15910_at   | 15910_at   | 1 | 0.02     | 0.17     | 1.15  | 0.27  | 0.86  | 1.89  | - |
|           | 0.12       | -0.03      |   | 0.54     | 0.32     | -0.22 | -0.2  | -1.71 |       |   |
| GENE1618X | 15611_s_at | 15611_s_at | 1 | 0.16     | 0.72     | 1.5   | 0.29  | 0.65  | 1.21  | - |
|           | 0.21       | 0.11       |   | 0.02     | 0.66     | -0.02 | -0.63 | -0.3  | -3.31 |   |
| GENE1414X | 13240_f_at | 13240_f_at | 1 | 0.22     | 0.93     | 0.96  | 0.13  | 0.08  | 0.4   | - |
|           | 0.01       | -0.24      |   | 0.02     | -0.25    | -0.67 | -0.65 | -2.22 |       |   |
| GENE1412X | 13943_at   | 13943_at   | 1 | 0.14     | -0.02    | 0.97  | 0.28  | 0.06  | 0.26  | - |
|           | 0.07       | -0.7       |   | -0.11    | -0.00978 | -1.11 | -0.68 | -1.96 |       |   |
| GENE1413X | 16559_s_at | 16559_s_at | 1 | 0.1      | 0.54     | 0.63  | -0.34 | 0.17  | 0.59  | - |
|           | 0.45       | -0.51      |   | 0.02     | -0.31    | -1.04 | -0.36 | -2.08 |       |   |
| GENE1411X | 14630_s_at | 14630_s_at | 1 | 0.33     | 0.34     | 0.52  | 0.04  | 0.14  | 0.19  | - |
|           | 0.35       | -0.4       |   | 0.09     | -0.17    | -1.05 | -0.42 | -1.21 |       |   |
| GENE1410X | 13464_at   | 13464_at   | 1 | 0.08     | 0.73     | 0.52  | 0.16  | 0.04  | 0.26  | - |
|           | 0.02       | -0.81      |   | -0.12    | -0.35    | -1.44 | -0.83 | -2.08 |       |   |
| GENE1409X | 16446_at   | 16446_at   | 1 | 0.29     | 0.61     | 1.12  | 0.25  | 0.66  | 1.18  | - |
|           | 0.000624   | -0.31      |   | -0.00961 | -0.04    | -0.79 | -0.42 | -0.86 |       |   |
| GENE1408X | 16820_at   | 16820_at   | 1 | 0.65     | 1.13     | 1.76  | -0.48 | 1.1   | 2.14  | - |
|           | 0.19       | -1         |   | 0.06     | -0.48    | -1    | -1.13 | -2.37 |       |   |
| GENE1407X | 13026_at   | 13026_at   | 1 | 0.52     | 1.32     | 1.28  | 0.18  | 1.3   | 1.29  | - |
|           | 0.72       | -0.79      |   | -1.02    | 0.36     | -1.32 | -1.02 | -1.37 |       |   |
| GENE1446X | 19742_at   | 19742_at   | 1 | -1.32    | -0.43    | -0.31 | 0.64  | 0.38  | 0.66  | - |
|           | 0.13       | 0.47       |   | 0        | 0.64     | 0.47  | 0.79  | -3.82 |       |   |
| GENE1445X | 15115_f_at | 15115_f_at | 1 | 0.14     | 0.47     | 0.01  | 0.24  | 0.5   | 0.14  | - |
|           | 0.16       | 0.44       |   | 0.07     | 0.47     | 0.55  | 0.36  | -2.14 |       |   |
| GENE1444X | 12766_at   | 12766_at   | 1 | 0.13     | 0.23     | 0.08  | 0.02  | 0.59  | 0.16  | - |
|           | 0.09       | 0.36       |   | 0.08     | 0.51     | 0.24  | 0.2   | -1.81 |       |   |
| GENE1443X | 20043_at   | 20043_at   | 1 | -0.08    | 0.04     | 0.56  | 0.02  | -0.31 | 0.11  | - |
|           | 0.2        | 0.4        |   | 0.4      | 0.1      | 0.06  | 0.04  | -2.17 |       |   |
| GENE1442X | 12505_s_at | 12505_s_at | 1 | 0.31     | 0.07     | 0.49  | 0.34  | -0.39 | -0.61 | - |
|           | 0.31       | 0.3        |   | 0.45     | 0.15     | -0.07 | 0.14  | -1.36 |       |   |



|           |            |            |          |       |       |       |       |       |       |   |  |
|-----------|------------|------------|----------|-------|-------|-------|-------|-------|-------|---|--|
| GENE1441X | 13855_at   | 13855_at   | 1        | 1.45  | 0.77  | 1.06  | 1.81  | 1.15  | 0.83  |   |  |
|           | 1.47       | 0.78       | 0.73     | 1.22  | 0.56  | 0.52  | -1.58 |       |       |   |  |
| GENE1440X | 12345_at   | 12345_at   | 1        | 1.64  | 0.53  | 0.6   | 1.6   | 0.68  | 0.7   |   |  |
|           | 1.36       | 0.42       | 0.47     | 1.43  | 0.22  | 0.47  | -1.04 |       |       |   |  |
| GENE1439X | 20539_at   | 20539_at   | 1        | 1.08  | 0.03  | 0.62  | 1.4   | 0.41  | 0.58  |   |  |
|           | 1.18       | 0.37       | 0.45     | 1.35  | 0.14  | 0.49  | -1.3  |       |       |   |  |
| GENE1438X | 19746_at   | 19746_at   | 1        | 0.8   | 0.32  | 0.74  | 0.69  | -0.17 | 0.13  |   |  |
|           | 0.7        | 0.48       | 0.32     | 0.49  | 0.08  | -0.03 | -1.17 |       |       |   |  |
| GENE1437X | 14380_at   | 14380_at   | 1        | 0.56  | 0.15  | 0.79  | 1.02  | -0.16 | 0.43  |   |  |
|           | 0.35       | -0.58      | 0.23     | 0.64  | -0.36 | 0.28  | -0.79 |       |       |   |  |
| GENE1371X | 19391_at   | 19391_at   | 1        | -0.44 | -1.39 | -0.2  | -0.11 | -0.46 | -0.06 | - |  |
|           | 0.68       | -0.85      | 0.09     | -0.02 | -0.1  | 0.15  | 0.64  |       |       |   |  |
| GENE1370X | 16553_f_at | 16553_f_at | 1        | -1.44 | -0.75 | 0.68  | -0.44 | -0.63 | 0.04  | - |  |
|           | 0.94       | -1.35      | 0.34     | -0.32 | -0.54 | 0.47  | 0.92  |       |       |   |  |
| GENE1369X | 17010_s_at | 17010_s_at | 1        | -2.81 | -2.14 | 0.22  | -0.67 | -1.27 | -0.77 | - |  |
|           | 2.81       | -1.64      | 0.39     | -1.02 | -0.73 | -0.29 | 1.53  |       |       |   |  |
| GENE1368X | 17552_s_at | 17552_s_at | 1        | -1.02 | -1.54 | 0.32  | -0.21 | -1.12 | -0.3  | - |  |
|           | 1.01       | -1.44      | 0.78     | -0.21 | -0.86 | 0.66  | -0.26 |       |       |   |  |
| GENE1367X | 13807_at   | 13807_at   | 1        | -0.5  | -0.97 | -0.25 | 0.04  | -1.24 | 0.05  | - |  |
|           | 0.27       | -0.65      | 0.63     | 0     | -1.15 | 0.96  | -0.53 |       |       |   |  |
| GENE1366X | 20178_at   | 20178_at   | 1        | 0.01  | -1.28 | -0.18 | -0.08 | -0.73 | 0.08  | - |  |
|           | 0.16       | -1.29      | 0.13     | -0.5  | -0.79 | 0.05  | -0.12 |       |       |   |  |
| GENE1365X | 18833_at   | 18833_at   | 1        | -0.47 | -3.34 | -0.31 | 0.07  | -1.34 | 0.4   | - |  |
|           | 0.58       | -1.12      | 0.36     | -0.03 | -1.6  | 0.25  | 0.25  |       |       |   |  |
| GENE1641X | 15923_at   | 15923_at   | 1        | -0.63 | -0.23 | -0.38 | -0.49 | -0.5  | -0.91 | - |  |
|           | 0.68       | -0.16      | 0.55     | -0.32 | 0     | 1.37  | -1.06 |       |       |   |  |
| GENE1640X | 18692_at   | 18692_at   | 1        | -0.49 | -0.16 | -0.06 | -0.25 | -0.25 | 0.02  | - |  |
|           | 0.63       | -0.02      | 1.17     | -0.45 | -0.19 | 0.83  | -0.41 |       |       |   |  |
| GENE850X  | 17880_s_at | 17880_s_at | 1        | -0.7  | -0.4  | -0.67 | -0.64 | -0.74 | -1.01 | - |  |
|           | 0.63       | 0.34       | 0.19     | -0.26 | 0.11  | -0.04 | -0.1  |       |       |   |  |
| GENE849X  | 13172_s_at | 13172_s_at | 1        | -1.13 | -0.67 | -0.61 | -1.31 | -0.7  | -1.2  | - |  |
|           | 0.61       | 0.56       | 0.4      | -0.33 | 0.01  | 0.08  | 0.02  |       |       |   |  |
| GENE1601X | 18876_at   | 18876_at   | 1        | -0.78 | -0.27 | 1.34  | 0.06  | -0.01 | 1.03  | - |  |
|           | 1.14       | -1.07      | 0.43     | -0.65 | -1.04 | 1.07  | -1.37 |       |       |   |  |
| GENE1600X | 14874_at   | 14874_at   | 1        | -0.63 | -0.09 | 1.26  | -0.52 | -0.79 | 1     | - |  |
|           | 0.71       | -1.58      | 0.48     | -1.72 | -1.87 | 0.84  | -1.86 |       |       |   |  |
| GENE785X  | 18556_at   | 18556_at   | 1        | -0.53 | -0.65 | -0.17 | -0.28 | -0.11 | 0.55  | - |  |
|           | 0.5        | -0.66      | 0.3      | -0.38 | -0.65 | -0.05 | -1.32 |       |       |   |  |
| GENE1605X | 16127_s_at | 16127_s_at | 1        | -0.46 | 0     | 0.75  | -0.49 | -0.11 | 0.53  | - |  |
|           | 0.75       | -0.21      | 0.39     | -0.35 | -1.02 | 0     | -0.53 |       |       |   |  |
| GENE793X  | 15041_at   | 15041_at   | 1        | -0.54 | 0.06  | 0.24  | -0.19 | 0.06  | 0.12  | - |  |
|           | 0.68       | -0.09      | 0.48     | -0.78 | -1.11 | 0.21  | -0.52 |       |       |   |  |
| GENE795X  | 12193_at   | 12193_at   | 1        | -0.89 | -0.28 | 0.66  | -0.89 | -0.07 | 0.66  | - |  |
|           | 0.93       | -0.53      | 0.62     | -1.37 | -0.64 | 0.49  | -1.28 |       |       |   |  |
| GENE794X  | 14624_at   | 14624_at   | 1        | -0.45 | 0.13  | 0.55  | -0.94 | -0.29 | 0.13  | - |  |
|           | 0.9        | -0.22      | 0.6      | -1.29 | -0.84 | -0.08 | -0.92 |       |       |   |  |
| GENE791X  | 13950_at   | 13950_at   | 1        | -0.94 | -0.03 | 0.43  | -0.86 | 0.11  | 0     | - |  |
|           | 1.35       | -0.58      | -0.06    | -0.94 | -1.27 | -0.61 | -1.18 |       |       |   |  |
| GENE790X  | 14733_s_at | 14733_s_at | 1        | -1.22 | 0.72  | 1.03  | -1.14 | 0.51  | 1.17  | - |  |
|           | 1.38       | -0.85      | 0.2      | -1.11 | -1.53 | -1.11 | -2.08 |       |       |   |  |
| GENE1415X | 14723_f_at | 14723_f_at | 1        | -0.02 | 1.22  | 1.05  | -0.65 | 0.1   | -0.2  | - |  |
|           | 0.35       | -0.54      | -0.00822 | -0.34 | -0.85 | -0.67 | -1.88 |       |       |   |  |
| GENE789X  | 20525_at   | 20525_at   | 1        | -0.31 | 0.77  | 1.48  | -0.89 | -0.48 | 0.48  | - |  |
|           | 0.89       | -0.34      | 0.37     | -1.44 | -1.22 | -0.32 | -1.83 |       |       |   |  |
| GENE788X  | 16555_at   | 16555_at   | 1        | -0.38 | 0.65  | 1.37  | -0.72 | 0.25  | 0     | - |  |
|           | 0.83       | 0          | 0        | -1.56 | -1.3  | 0     | -1.94 |       |       |   |  |

|          |            |            |       |       |       |       |       |       |          |   |
|----------|------------|------------|-------|-------|-------|-------|-------|-------|----------|---|
| GENE787X | 19656_s_at | 19656_s_at | 1     | -0.16 | 0.64  | 1.16  | -0.18 | 0.24  | 0.54     | - |
|          | 1.2        | -0.61      | 0.36  | -0.66 | -1.14 | -0.49 | -1.04 |       |          |   |
| GENE786X | 13568_at   | 13568_at   | 1     | -0.62 | 0.64  | 3.08  | -0.51 | 0.04  | 0.69     | - |
|          | 1.08       | -1.88      | 0.88  | -1.06 | -3    | -0.37 | -2.48 |       |          |   |
| GENE848X | 18015_i_at | 18015_i_at | 1     | -1.17 | 0.1   | -0.03 | -1.64 | 0.35  | -0.43    | - |
|          | 1.95       | 1.62       | 0.35  | -1.51 | 1.69  | 0.35  | -3.1  |       |          |   |
| GENE847X | 18017_f_at | 18017_f_at | 1     | -1.08 | -0.41 | 0.07  | -0.92 | -0.63 | -0.19    | - |
|          | 1.11       | 0.6        | 0.53  | -1.15 | 0.45  | 0.45  | -1.36 |       |          |   |
| GENE846X | 18016_r_at | 18016_r_at | 1     | -1.76 | -0.76 | 0.11  | -1.84 | -0.81 | -0.59    | - |
|          | 1.84       | 0.08       | 0.35  | -1.72 | 0.13  | 0.54  | -4.47 |       |          |   |
| GENE845X | 16051_at   | 16051_at   | 1     | -0.52 | -0.26 | -0.44 | -0.42 | -0.2  | -0.4     | - |
|          | 0.43       | -0.08      | 0.1   | -0.34 | 0.09  | 0.16  | -1.05 |       |          |   |
| GENE844X | 20588_at   | 20588_at   | 1     | -0.96 | -0.13 | -0.62 | -0.9  | -0.18 | -0.88    | - |
|          | 1.17       | 0.23       | 0     | -0.96 | -0.44 | 0     | -1.54 |       |          |   |
| GENE798X | 13018_at   | 13018_at   | 1     | 0.26  | 0     | 0     | -0.3  | 0     | 0        | - |
|          | 0.25       | 0          | 0     | -1.72 | 0     | 0     | -1.58 |       |          |   |
| GENE796X | 18311_at   | 18311_at   | 1     | -0.16 | 0.26  | 0.06  | -0.3  | -0.24 | -0.00888 |   |
|          | -0.29      | -0.09      | 0.22  | -0.75 | -0.75 | 0.22  | -1.5  |       |          |   |
| GENE812X | 15398_at   | 15398_at   | 1     | -0.34 | -0.91 | -0.31 | -0.98 | -0.88 | 0.21     | - |
|          | 0.39       | -0.42      | -0.13 | -1.13 | -0.12 | 0.04  | -0.46 |       |          |   |
| GENE805X | 16328_s_at | 16328_s_at | 1     | -0.38 | -0.13 | 0.47  | -0.27 | -0.2  | 0.5      | - |
|          | 0.75       | -0.45      | 0.04  | -1.01 | -0.56 | 0.07  | -0.45 |       |          |   |
| GENE804X | 14926_g_at | 14926_g_at | 1     | -0.37 | -0.28 | 0.61  | -0.24 | -0.51 | 0.04     | - |
|          | 0.4        | -0.68      | -0.14 | -1.3  | -0.68 | 0.09  | -0.45 |       |          |   |
| GENE803X | 16543_s_at | 16543_s_at | 1     | -0.39 | -0.13 | -0.16 | -0.65 | -0.3  | 0.32     | - |
|          | 0.6        | -0.47      | -0.41 | -0.52 | -1.13 | 0.23  | -0.74 |       |          |   |
| GENE802X | 14135_at   | 14135_at   | 1     | -0.05 | -0.1  | -0.04 | -0.33 | -0.12 | -0.15    | - |
|          | 0.2        | -0.52      | -0.02 | -1.03 | -0.75 | -0.17 | -0.63 |       |          |   |
| GENE801X | 17019_s_at | 17019_s_at | 1     | -0.64 | -0.28 | 0.16  | -1.47 | -0.65 | 0.58     | - |
|          | 1.23       | -0.45      | -0.41 | -2.15 | -1.13 | -0.67 | -2.32 |       |          |   |
| GENE800X | 12945_at   | 12945_at   | 1     | -0.62 | -0.8  | 0     | -1.28 | -0.34 | 0        | - |
|          | 1.33       | -0.8       | 0     | -2    | -1.48 | 0     | -1.17 |       |          |   |
| GENE799X | 12609_at   | 12609_at   | 1     | -1.32 | -0.76 | -0.26 | -4.73 | -1.53 | -0.26    | - |
|          | 4.73       | -4.42      | -0.26 | -4.73 | -4.42 | -0.26 | -5.6  |       |          |   |
| GENE841X | 14982_at   | 14982_at   | 1     | -0.95 | -0.56 | -0.28 | -0.59 | 0.2   | 0.59     | - |
|          | 1.3        | 0.35       | -0.42 | -1.01 | 0.25  | -0.03 | -0.22 |       |          |   |
| GENE840X | 15516_s_at | 15516_s_at | 1     | -0.82 | -0.04 | 0.16  | -0.95 | 0.25  | 0.3      | - |
|          | 1.2        | 0.35       | -0.33 | -1.01 | 0.07  | -0.5  | -1.03 |       |          |   |
| GENE829X | 14096_at   | 14096_at   | 1     | -0.83 | -0.48 | -0.81 | -0.73 | -0.3  | -0.24    | - |
|          | 2.21       | -0.71      | -1.11 | -1.01 | 0.02  | -0.38 | 0.77  |       |          |   |
| GENE828X | 18356_at   | 18356_at   | 1     | -0.53 | -0.25 | 0.19  | -0.27 | -0.66 | -0.18    | - |
|          | 1.11       | -0.43      | -0.71 | -0.74 | -0.33 | -0.5  | 0.26  |       |          |   |
| GENE823X | 14806_at   | 14806_at   | 1     | -0.61 | 0.34  | 0.23  | -1.15 | 0.13  | -0.3     | - |
|          | 0.68       | 0.16       | -0.23 | -1.05 | -0.35 | -0.73 | 0.32  |       |          |   |
| GENE822X | 14595_at   | 14595_at   | 1     | -0.71 | 0.32  | 0.26  | -0.61 | 0.01  | -0.35    | - |
|          | 1.11       | -0.08      | -0.28 | -0.65 | -0.77 | -0.92 | 0.05  |       |          |   |
| GENE826X | 15256_at   | 15256_at   | 1     | -1.18 | -0.44 | -0.48 | -0.97 | 0.05  | -0.7     | - |
|          | 1.83       | -0.8       | -0.51 | -1.37 | -1.1  | -0.77 | 0.38  |       |          |   |
| GENE824X | 17320_g_at | 17320_g_at | 1     | -0.63 | 0.35  | -0.34 | -0.56 | 0.17  | -0.29    | - |
|          | 1.16       | -0.47      | -0.15 | -0.93 | -0.31 | -0.73 | 0.57  |       |          |   |
| GENE827X | 15907_at   | 15907_at   | 1     | -0.46 | -0.28 | -0.08 | -0.38 | -0.1  | 0.29     | - |
|          | 1.08       | -0.28      | -0.22 | -0.91 | -0.45 | -0.37 | 0.05  |       |          |   |
| GENE821X | 18706_s_at | 18706_s_at | 1     | -0.75 | 0.26  | 0.02  | -1.26 | 0.07  | 0.02     | - |
|          | 1.16       | -0.84      | -0.58 | -1.13 | -0.87 | -0.76 | 0.04  |       |          |   |
| GENE820X | 15975_s_at | 15975_s_at | 1     | -1.3  | 0.07  | 0.41  | -1.4  | 0.47  | 0.15     | - |
|          | 1.5        | -1.5       | -0.9  | -1.62 | -1.04 | -1.03 | 0.59  |       |          |   |

|          |            |            |       |       |       |       |         |       |       |   |
|----------|------------|------------|-------|-------|-------|-------|---------|-------|-------|---|
| GENE819X | 15077_at   | 15077_at   | 1     | -0.9  | 0.01  | -0.26 | -0.9    | 0.2   | -0.19 | - |
|          | 1.17       | -0.3       | -0.36 | -1    | -0.45 | -0.54 | 0.19    |       |       |   |
| GENE818X | 16486_at   | 16486_at   | 1     | -0.89 | 0.27  | -0.05 | -0.97   | 0.23  | -0.2  | - |
|          | 1.54       | -0.2       | -0.39 | -1.1  | -0.87 | -0.81 | -0.19   |       |       |   |
| GENE817X | 19030_at   | 19030_at   | 1     | -0.81 | 0.27  | -0.53 | -1.06   | 0.24  | -0.07 | - |
|          | 1.31       | -0.84      | -0.8  | -1.74 | -0.78 | -0.74 | -0.33   |       |       |   |
| GENE816X | 17423_s_at | 17423_s_at | 1     | -1.25 | 0.3   | -0.03 | -1.45   | -0.1  | -0.4  | - |
|          | 2.21       | -0.8       | -0.88 | -2.29 | -1.39 | -1.75 | -0.18   |       |       |   |
| GENE815X | 13544_at   | 13544_at   | 1     | -0.76 | 0.1   | 0.29  | -1.3    | -0.01 | 0.07  | - |
|          | 1.36       | -0.57      | -0.86 | -1.71 | -1.4  | -1.6  | 0.00475 |       |       |   |
| GENE814X | 18354_at   | 18354_at   | 1     | -1    | -0.12 | 0.23  | -1.62   | -0.18 | -0.42 | - |
|          | 1.56       | -0.59      | -0.46 | -2    | -0.73 | -1.15 | -0.34   |       |       |   |
| GENE813X | 12761_s_at | 12761_s_at | 1     | -3.74 | -0.23 | -0.13 | -4.03   | -0.96 | -0.75 | - |
|          | 4.26       | -2.34      | -2.34 | -4.26 | -2.83 | -3.34 | -2.13   |       |       |   |
| GENE835X | 16239_at   | 16239_at   | 1     | -0.51 | 0.13  | -0.12 | -0.48   | -0.32 | -0.4  | - |
|          | 1.01       | -0.1       | -0.24 | -0.59 | -0.32 | -0.06 | -0.39   |       |       |   |
| GENE834X | 12410_g_at | 12410_g_at | 1     | -0.88 | -0.46 | -0.43 | -0.92   | -0.29 | -0.41 | - |
|          | 1.08       | -0.5       | -0.63 | -1.19 | -0.32 | -0.34 | -0.78   |       |       |   |
| GENE833X | 17572_s_at | 17572_s_at | 1     | -1.15 | -0.48 | -0.67 | -1.96   | -0.48 | -0.67 | - |
|          | 2.37       | -0.48      | -0.67 | -3.11 | -0.48 | -0.67 | -1.13   |       |       |   |
| GENE810X | 18584_at   | 18584_at   | 1     | -1.58 | 0.45  | 0.67  | -2.96   | -0.67 | 0     | - |
|          | 2.96       | -0.67      | 0     | -2.96 | -0.67 | 0     | -1.55   |       |       |   |
| GENE809X | 12765_at   | 12765_at   | 1     | -0.52 | -0.05 | 0.12  | -0.83   | -0.01 | -0.12 | - |
|          | 1.1        | -0.48      | 0     | -1.05 | -0.84 | -0.66 | -0.47   |       |       |   |
| GENE808X | 12795_at   | 12795_at   | 1     | -0.88 | -0.26 | 0.1   | -1.4    | -0.56 | -0.22 | - |
|          | 1.65       | -0.65      | 0     | -1.24 | -0.94 | -0.4  | -0.4    |       |       |   |
| GENE807X | 19049_at   | 19049_at   | 1     | -0.68 | -0.32 | 0.28  | -0.79   | -0.57 | 0.08  | - |
|          | 1.3        | -0.82      | -0.02 | -1.33 | -1.01 | -0.27 | -0.81   |       |       |   |
| GENE806X | 14712_s_at | 14712_s_at | 1     | -1.13 | -0.22 | 0.22  | -1.53   | -0.91 | -0.74 | - |
|          | 2.17       | -1         | 0.03  | -1.96 | -1.38 | -0.55 | -1.64   |       |       |   |
| GENE856X | 13533_at   | 13533_at   | 1     | -0.64 | 0.45  | -0.65 | -1.19   | -0.33 | -0.58 | - |
|          | 1.24       | 0.15       | -0.65 | -0.76 | 0.5   | -0.91 | -0.03   |       |       |   |
| GENE855X | 18192_s_at | 18192_s_at | 1     | -0.81 | 0.07  | -0.67 | -0.65   | 0.58  | -0.57 | - |
|          | 1.65       | 0.65       | -0.97 | -0.69 | 0.14  | -1.06 | -0.09   |       |       |   |
| GENE854X | 17461_at   | 17461_at   | 1     | -1.05 | 0.15  | -0.87 | -0.91   | 0.36  | -0.51 | - |
|          | 1.09       | 0.26       | -0.4  | -1.17 | 0.06  | -0.23 | 0.51    |       |       |   |
| GENE853X | 18958_s_at | 18958_s_at | 1     | -0.57 | 0.14  | -1.12 | -0.39   | 0.09  | -0.7  | - |
|          | 0.6        | 0          | -0.62 | -0.49 | 0.14  | -0.64 | -0.26   |       |       |   |
| GENE852X | 19147_at   | 19147_at   | 1     | -0.66 | -0.64 | -1.38 | -0.58   | -0.28 | -0.91 | - |
|          | 0.77       | 0.09       | -0.84 | -0.41 | -0.04 | -1    | -0.08   |       |       |   |
| GENE851X | 13541_at   | 13541_at   | 1     | -1.2  | -0.02 | -0.96 | -0.8    | -0.2  | -0.85 | - |
|          | 0.98       | -0.15      | -0.64 | -0.64 | -0.57 | -0.88 | 0.19    |       |       |   |
| GENE832X | 13709_at   | 13709_at   | 1     | -0.63 | -0.33 | -0.4  | -1.11   | -0.6  | -0.89 | - |
|          | 0.79       | -0.22      | -0.51 | -0.98 | -0.17 | -0.23 | -0.86   |       |       |   |
| GENE831X | 13422_at   | 13422_at   | 1     | -0.63 | -0.76 | -0.72 | -1.06   | -0.54 | -1.17 | - |
|          | 1.02       | -0.46      | -0.69 | -0.73 | -0.43 | -0.53 | -0.67   |       |       |   |
| GENE666X | 18592_at   | 18592_at   | 1     | -0.61 | 0.08  | -1.09 | -0.64   | -0.79 | -1.73 | - |
|          | 1.29       | -0.13      | -0.76 | -1.42 | -0.23 | -0.76 | -0.62   |       |       |   |
| GENE665X | 19998_at   | 19998_at   | 1     | -0.4  | -0.11 | -0.55 | -1.16   | -0.5  | -1.55 | - |
|          | 1.28       | -0.33      | -0.65 | -1.73 | -0.47 | -0.75 | -0.3    |       |       |   |
| GENE631X | 19553_at   | 19553_at   | 1     | -0.29 | -0.06 | -0.7  | -0.29   | -0.22 | -0.7  | - |
|          | 0.62       | -0.15      | -0.47 | -1.43 | 0.05  | -0.62 | -0.68   |       |       |   |
| GENE630X | 14067_at   | 14067_at   | 1     | -0.54 | -1.03 | -1.03 | -0.86   | -0.52 | -0.71 | - |
|          | 0.56       | -0.69      | -1.27 | -2.65 | -0.6  | -2.12 | -1.41   |       |       |   |
| GENE629X | 13447_at   | 13447_at   | 1     | -0.97 | -1.4  | -2.45 | -1.4    | -0.53 | -0.97 | - |
|          | 1.64       | -0.4       | -0.69 | -3.4  | -1.49 | -0.92 | -1.86   |       |       |   |

|           |            |            |       |       |       |          |       |       |       |    |
|-----------|------------|------------|-------|-------|-------|----------|-------|-------|-------|----|
| GENE811X  | 16792_at   | 16792_at   | 1     | -0.24 | -0.08 | -0.11    | -0.95 | 0     | 0.07  | -  |
|           | 0.21       | -0.05      | -0.26 | -1.15 | -0.75 | -0.55    | -0.41 |       |       |    |
| GENE870X  | 18091_at   | 18091_at   | 1     | -0.49 | 0.82  | 0.59     | -0.68 | 0.63  | 0.24  | -1 |
|           | -0.48      | -0.72      | -1.01 | -0.85 | -1.38 | -0.2     |       |       |       |    |
| GENE768X  | 13640_at   | 13640_at   | 1     | -0.44 | 1.23  | 0.37     | -1.1  | 1.19  | -0.39 | -  |
|           | 1.83       | -0.72      | -1.29 | -1.71 | -1.12 | -2.11    | -1.05 |       |       |    |
| GENE769X  | 19258_at   | 19258_at   | 1     | -0.58 | 0.53  | -0.02    | -0.82 | 0.76  | -0.09 | -  |
|           | 1.28       | -0.5       | -0.47 | -1.28 | -1.11 | -1.09    | -0.31 |       |       |    |
| GENE767X  | 13543_at   | 13543_at   | 1     | -0.79 | 1.18  | 0.62     | -1.05 | 0.68  | -0.54 | -  |
|           | 1.27       | -0.77      | -0.89 | -1.44 | -1.89 | -1.58    | -0.51 |       |       |    |
| GENE766X  | 12447_at   | 12447_at   | 1     | -0.29 | 0.21  | -0.00832 |       | -0.99 | 0.53  |    |
|           | 0.29       | -0.81      | -0.74 | -0.75 | -1.57 | -1.29    | -0.98 | -0.48 |       |    |
| GENE765X  | 14610_at   | 14610_at   | 1     | -0.87 | 0.71  | 0.84     | -0.54 | 0.3   | 0.12  | -  |
|           | 1.24       | -1.3       | -0.92 | -2.3  | -1.63 | -1.6     | -0.85 |       |       |    |
| GENE780X  | 16873_i_at | 16873_i_at | 1     | -0.12 | 0.45  | 0.25     | -1.12 | 2.85  | -1.11 | -  |
|           | 1.41       | -0.67      | -2.11 | -2.26 | -0.67 | -2.37    | 1     |       |       |    |
| GENE777X  | 19872_at   | 19872_at   | 1     | -0.25 | 0.58  | -0.18    | -1.31 | 0.5   | -0.68 | -  |
|           | 0.95       | 0.16       | -0.64 | -0.82 | -0.12 | -0.83    | -0.5  |       |       |    |
| GENE655X  | 13347_at   | 13347_at   | 1     | -0.48 | 0.31  | -0.36    | -0.8  | 0.02  | -0.6  | -  |
|           | 0.63       | -0.09      | -0.78 | -0.48 | -0.34 | -1.11    | -0.56 |       |       |    |
| GENE654X  | 16066_at   | 16066_at   | 1     | -1.34 | 0.71  | -0.52    | -2.72 | 0.23  | -3.48 | -  |
|           | 1.29       | -1         | -2    | -2.04 | -1.22 | -3.48    | -1.3  |       |       |    |
| GENE628X  | 13513_at   | 13513_at   | 1     | -0.7  | 0.29  | -0.69    | -0.81 | 0.44  | -0.22 | -  |
|           | 0.87       | -0.25      | -1.38 | -0.96 | -0.45 | -1.02    | -0.93 |       |       |    |
| GENE627X  | 19396_at   | 19396_at   | 1     | -1.45 | 0.49  | -0.58    | -1.39 | 0.79  | -0.84 | -  |
|           | 1.89       | -0.5       | -1.46 | -1.58 | -0.5  | -2.17    | -0.78 |       |       |    |
| GENE626X  | 19569_at   | 19569_at   | 1     | -0.53 | 0.25  | -0.22    | -0.56 | 0.11  | -0.42 | -  |
|           | 1.08       | -0.58      | -0.93 | -0.85 | -0.58 | -1.27    | -0.19 |       |       |    |
| GENE618X  | 14746_at   | 14746_at   | 1     | -0.15 | 0.35  | -0.63    | -0.32 | 0.26  | -0.73 | -  |
|           | 0.86       | -0.07      | -0.89 | -0.73 | -0.41 | -1.43    | -0.4  |       |       |    |
| GENE1507X | 18695_s_at | 18695_s_at | 1     | -0.28 | 0.24  | -0.44    | -0.21 | -0.12 | -1.22 | -  |
|           | 0.57       | 0.21       | -0.93 | -0.25 | -0.18 | -1.58    | -0.61 |       |       |    |
| GENE1506X | 13883_at   | 13883_at   | 1     | -0.09 | 0.15  | -0.45    | -0.06 | 0     | -1.02 | -  |
|           | 0.21       | 0.22       | -0.76 | -0.24 | -0.5  | -1.57    | -0.43 |       |       |    |
| GENE657X  | 15484_at   | 15484_at   | 1     | -0.16 | 0.12  | -0.38    | -0.36 | -0.32 | -1.22 | -  |
|           | 0.89       | 0.15       | -0.68 | -0.26 | -0.54 | -1.06    | -0.33 |       |       |    |
| GENE1190X | 18581_at   | 18581_at   | 1     | -0.39 | -0.18 | -1.59    | -0.49 | 0.12  | -1.16 | -  |
|           | 0.97       | -1.91      | -2.76 | -0.58 | -1.4  | -2.72    | -0.36 |       |       |    |
| GENE1189X | 15781_at   | 15781_at   | 1     | -0.44 | -0.2  | -1.1     | 0.22  | -0.2  | -1.48 | -  |
|           | 0.9        | -1.93      | -2.41 | -0.15 | -1.35 | -2.9     | -1    |       |       |    |
| GENE1188X | 20385_at   | 20385_at   | 1     | -0.67 | 0.29  | -1.23    | -0.17 | -0.11 | -1.71 | -  |
|           | 1.21       | -2.28      | -2.79 | -0.41 | -2.03 | -4.07    | -1.65 |       |       |    |
| GENE723X  | 16518_at   | 16518_at   | 1     | 0.08  | 0.32  | -1.08    | -0.15 | 0.37  | -0.88 | -  |
|           | 0.25       | -0.47      | -1.26 | -0.39 | -0.64 | -1.3     | -0.84 |       |       |    |
| GENE719X  | 19219_at   | 19219_at   | 1     | 0.03  | 0.21  | -1.01    | -0.56 | -0.13 | -1.48 | -  |
|           | 0.74       | -0.97      | -4.44 | -1.07 | -1.23 | -3.96    | -2.02 |       |       |    |
| GENE718X  | 17098_s_at | 17098_s_at | 1     | -0.06 | 0.12  | -0.39    | -0.59 | 0.13  | -1    | -  |
|           | 0.37       | -0.5       | -1.35 | -0.53 | -1.2  | -2.08    | -0.77 |       |       |    |
| GENE717X  | 12559_at   | 12559_at   | 1     | -0.28 | 0.19  | -0.8     | -0.28 | 0.21  | -1.22 | -  |
|           | 0.88       | -0.85      | -1.7  | -0.88 | -1.09 | -1.98    | -1.26 |       |       |    |
| GENE716X  | 19663_at   | 19663_at   | 1     | -0.22 | 0.28  | -0.75    | -0.36 | 0.12  | -1.29 | -  |
|           | 0.82       | -0.71      | -1.5  | -0.91 | -1.28 | -2.17    | -1.06 |       |       |    |
| GENE715X  | 15319_at   | 15319_at   | 1     | -0.3  | -0.03 | -0.8     | -0.07 | -0.16 | -0.94 | -  |
|           | 0.74       | -0.6       | -1.72 | -0.74 | -1.24 | -1.9     | -1    |       |       |    |
| GENE714X  | 16905_s_at | 16905_s_at | 1     | -0.25 | 0.19  | -0.76    | -0.48 | 0.01  | -1.2  | -  |
|           | 0.7        | -0.79      | -1.81 | -0.69 | -1.15 | -1.96    | -0.54 |       |       |    |

|           |            |            |       |       |       |       |       |       |       |    |
|-----------|------------|------------|-------|-------|-------|-------|-------|-------|-------|----|
| GENE713X  | 12526_at   | 12526_at   | 1     | -0.26 | 0.2   | -0.63 | -0.26 | 0.24  | -1.58 | -  |
|           | 0.92       | -1.19      | -2.22 | -0.77 | -1.3  | -2.58 | -1.04 |       |       |    |
| GENE622X  | 14047_g_at | 14047_g_at | 1     | -0.16 | 0.05  | -1.33 | -0.43 | -0.5  | -1.61 | -  |
|           | 0.58       | -0.66      | -1.68 | -1.29 | -1.17 | -1.68 | -0.48 |       |       |    |
| GENE621X  | 12405_at   | 12405_at   | 1     | -0.04 | -0.07 | -1.92 | -0.57 | 0.19  | -1.76 | -  |
|           | 0.5        | -1.39      | -1.76 | -1.04 | -1.33 | -2.48 | -0.77 |       |       |    |
| GENE620X  | 13621_g_at | 13621_g_at | 1     | -0.27 | -0.26 | -1.21 | -0.36 | -0.46 | -1.86 | -  |
|           | 0.47       | -1.41      | -1.59 | -1.2  | -1.64 | -2.41 | -1.08 |       |       |    |
| GENE661X  | 20710_at   | 20710_at   | 1     | -0.26 | -0.04 | -0.54 | 0.03  | -0.04 | -0.8  | -  |
|           | 0.74       | 0          | -1.05 | -0.39 | 0.04  | -1.17 | -0.65 |       |       |    |
| GENE660X  | 13250_s_at | 13250_s_at | 1     | -0.41 | -0.04 | -0.76 | -0.35 | -0.29 | -0.86 | -  |
|           | 1.41       | -0.54      | -1.42 | -0.14 | -0.04 | -1.21 | -0.77 |       |       |    |
| GENE619X  | 14418_at   | 14418_at   | 1     | -0.26 | -0.14 | -1.22 | -0.34 | -0.14 | -0.95 | -  |
|           | 1.44       | -0.83      | -2.28 | -0.77 | -0.67 | -1.69 | -0.09 |       |       |    |
| GENE725X  | 20056_at   | 20056_at   | 1     | -0.17 | 0.63  | -0.23 | -0.25 | 0.36  | -0.82 | -  |
|           | 0.52       | -0.28      | -0.95 | -0.63 | -0.4  | -1.2  | -0.81 |       |       |    |
| GENE724X  | 19012_at   | 19012_at   | 1     | -0.21 | 0.49  | -0.39 | -0.17 | 0.14  | -0.79 | -  |
|           | 0.51       | -0.68      | -1.23 | -0.61 | -0.56 | -1.42 | -1.32 |       |       |    |
| GENE750X  | 14384_at   | 14384_at   | 1     | -0.87 | 0.4   | -0.75 | -0.76 | 0.51  | -0.82 | -1 |
|           | -0.85      | -2.44      | -1.28 | -1.21 | -3.82 | -1.7  |       |       |       |    |
| GENE749X  | 15661_s_at | 15661_s_at | 1     | -0.81 | 0.69  | -0.41 | -0.33 | -0.24 | -0.85 | -1 |
|           | -1.17      | -1.9       | -1.21 | -1.4  | -3.48 | -2.09 |       |       |       |    |
| GENE730X  | 15183_s_at | 15183_s_at | 1     | -0.51 | 0.79  | -1.32 | -1.03 | 0.17  | -1.18 | -  |
|           | 2.47       | -1.78      | -2.47 | -1.8  | -2.07 | -3.32 | -2.53 |       |       |    |
| GENE712X  | 18004_at   | 18004_at   | 1     | -0.77 | 0.3   | -0.53 | -0.81 | 0.05  | -0.83 | -1 |
|           | -0.93      | -1.68      | -0.52 | -1.57 | -1.98 | -1.3  |       |       |       |    |
| GENE711X  | 13459_at   | 13459_at   | 1     | -0.94 | -0.58 | -1.1  | -1.25 | -0.26 | -1.57 | -  |
|           | 1.57       | -1.69      | -3.36 | -1.57 | -2.24 | -3.7  | -2.56 |       |       |    |
| GENE710X  | 13593_at   | 13593_at   | 1     | -0.74 | -0.13 | -1.24 | -0.69 | -0.15 | -1.22 | -  |
|           | 1.13       | -1.51      | -2.45 | -0.92 | -1.85 | -2.79 | -1.66 |       |       |    |
| GENE709X  | 16547_s_at | 16547_s_at | 1     | -1.14 | -0.39 | -2.29 | -2.02 | -0.53 | -2.52 | -  |
|           | 2.4        | -3.64      | -5.56 | -2.02 | -3.64 | -5.56 | -3.57 |       |       |    |
| GENE503X  | 20546_at   | 20546_at   | 1     | -0.05 | -0.07 | -0.36 | -0.17 | 0.03  | -0.49 | -  |
|           | 0.47       | -0.57      | -0.99 | -0.38 | -0.82 | -1.36 | -0.88 |       |       |    |
| GENE502X  | 18546_at   | 18546_at   | 1     | -0.48 | 0.13  | -0.74 | -0.57 | -0.11 | -0.76 | -  |
|           | 0.76       | -1.37      | -1.78 | -0.54 | -1.68 | -2.17 | -1.71 |       |       |    |
| GENE736X  | 16131_s_at | 16131_s_at | 1     | -0.57 | 0.08  | -0.49 | -0.53 | 0.09  | -1.26 | -  |
|           | 0.76       | -0.46      | -0.76 | -0.64 | -0.9  | -1.49 | -1.33 |       |       |    |
| GENE737X  | 16316_at   | 16316_at   | 1     | -0.6  | 0.42  | -0.64 | -0.68 | -0.14 | -1.02 | -  |
|           | 1.01       | -0.37      | -1.32 | -0.71 | -0.8  | -2.04 | -1.61 |       |       |    |
| GENE722X  | 13232_s_at | 13232_s_at | 1     | -0.34 | 0.03  | -0.59 | -0.14 | -0.01 | -0.87 | -  |
|           | 0.69       | -0.45      | -1.29 | -0.73 | -0.63 | -1.61 | -1.33 |       |       |    |
| GENE656X  | 14956_at   | 14956_at   | 1     | -0.4  | 0.23  | -0.5  | -0.53 | -0.04 | -1.33 | -  |
|           | 0.98       | -0.04      | -1.34 | -0.95 | -0.48 | -1.31 | -1.33 |       |       |    |
| GENE721X  | 14890_at   | 14890_at   | 1     | -0.28 | 0.18  | -0.66 | -0.73 | 0.41  | -2.05 | -  |
|           | 1.79       | -1.44      | -2.58 | -1.32 | -1.1  | -3.17 | -1.74 |       |       |    |
| GENE720X  | 16696_at   | 16696_at   | 1     | -1.11 | -0.15 | -1.13 | -0.65 | -0.15 | -2.34 | -  |
|           | 1.7        | -1.22      | -3.45 | -0.94 | -1.52 | -2.87 | -1.63 |       |       |    |
| GENE625X  | 16607_s_at | 16607_s_at | 1     | -0.65 | 0.03  | -0.95 | -0.87 | -0.15 | -1.35 | -  |
|           | 1.02       | -0.52      | -1.55 | -1.02 | -0.75 | -2.46 | -0.92 |       |       |    |
| GENE191X  | 14727_s_at | 14727_s_at | 1     | -0.37 | -0.04 | -0.81 | -0.44 | -0.16 | -1.45 | -  |
|           | 0.81       | -0.43      | -1.11 | -0.6  | -0.72 | -1.56 | -0.98 |       |       |    |
| GENE1146X | 16751_at   | 16751_at   | 1     | 0.11  | -0.4  | -1.95 | -0.84 | -1.04 | -2.45 | -  |
|           | 0.84       | -1.4       | -2.45 | -1.26 | -1.62 | -3.72 | -3    |       |       |    |
| GENE747X  | 12486_at   | 12486_at   | 1     | 0     | -0.1  | -0.87 | -0.33 | -0.15 | -1    | -  |
|           | 0.68       | -1.15      | -1.27 | -1.05 | -0.68 | -1.61 | -1.78 |       |       |    |

|          |            |            |       |       |       |       |       |       |       |    |
|----------|------------|------------|-------|-------|-------|-------|-------|-------|-------|----|
| GENE178X | 15446_at   | 15446_at   | 1     | -0.37 | 0.01  | -0.5  | -0.39 | -0.02 | -0.92 | -  |
|          | 0.49       | -0.66      | -0.88 | -0.46 | -0.5  | -1.02 | -1.04 |       |       |    |
| GENE177X | 18475_at   | 18475_at   | 1     | -0.51 | -0.23 | -1.08 | -0.13 | -0.24 | -1.28 | -  |
|          | 0.63       | -1.01      | -1.31 | -0.79 | -0.68 | -1.51 | -1.36 |       |       |    |
| GENE176X | 19453_at   | 19453_at   | 1     | -1.12 | -0.46 | -2.52 | -1    | -0.62 | -3.2  | -3 |
|          | -2.51      | -3.2       | -1.49 | -3    | -3.2  | -3.51 |       |       |       |    |
| GENE663X | 18877_at   | 18877_at   | 1     | -0.2  | -0.06 | -0.87 | -0.82 | -0.37 | -2.19 | -  |
|          | 0.55       | -1.37      | -0.98 | -1.48 | -0.21 | -1.26 | -0.43 |       |       |    |
| GENE662X | 12576_at   | 12576_at   | 1     | -0.57 | -0.05 | -1.03 | -0.79 | 0.11  | -4.91 | -  |
|          | 1.48       | -1.58      | -2.24 | -1.48 | -2.05 | -2.49 | -1.77 |       |       |    |
| GENE658X | 19218_at   | 19218_at   | 1     | -0.14 | 0.09  | -0.23 | -0.4  | -0.52 | -0.62 | -  |
|          | 0.71       | -0.01      | -0.68 | -0.5  | -0.41 | -1.01 | -0.81 |       |       |    |
| GENE647X | 15829_at   | 15829_at   | 1     | -0.37 | -0.27 | -0.36 | -0.51 | -0.37 | -0.76 | -  |
|          | 0.72       | -0.41      | -1.04 | -0.85 | -0.74 | -1.23 | -1.26 |       |       |    |
| GENE646X | 13233_at   | 13233_at   | 1     | -0.28 | -0.31 | -0.63 | -0.29 | -0.41 | -0.98 | -  |
|          | 0.84       | -0.32      | -1.25 | -0.79 | -0.75 | -1.05 | -1.01 |       |       |    |
| GENE653X | 13672_at   | 13672_at   | 1     | -0.54 | -0.11 | -0.07 | -0.81 | -0.43 | -1.14 | -  |
|          | 1.33       | -0.47      | -0.49 | -0.79 | -0.81 | -1.12 | -0.9  |       |       |    |
| GENE652X | 19995_at   | 19995_at   | 1     | -0.75 | 0     | -0.51 | -0.69 | -0.17 | -0.72 | -  |
|          | 0.96       | -0.36      | -0.78 | -0.72 | -0.46 | -1.14 | -0.94 |       |       |    |
| GENE651X | 20090_at   | 20090_at   | 1     | -0.74 | -0.26 | -0.83 | -1.3  | -0.12 | -2    | -  |
|          | 1.7        | -1.26      | -1.3  | -1.79 | -0.77 | -1.83 | -2.24 |       |       |    |
| GENE650X | 14335_at   | 14335_at   | 1     | -0.7  | -0.05 | -0.63 | -1.06 | -0.21 | -1.39 | -  |
|          | 1.36       | -0.43      | -1.3  | -1.49 | -0.78 | -1.3  | -1.54 |       |       |    |
| GENE649X | 12124_at   | 12124_at   | 1     | -1.13 | -0.46 | -0.64 | -0.82 | -0.55 | -1.53 | -  |
|          | 1.87       | -1.03      | -1.07 | -1.69 | -1.09 | -1.53 | -1.84 |       |       |    |
| GENE664X | 15418_at   | 15418_at   | 1     | -0.63 | 0.1   | -0.19 | -0.97 | -0.49 | -1.22 | -  |
|          | 0.71       | -0.38      | -0.51 | -1.49 | -1.02 | -1.48 | -0.43 |       |       |    |
| GENE635X | 15681_s_at | 15681_s_at | 1     | -0.64 | -0.35 | -0.73 | -0.72 | -0.44 | -0.74 | -  |
|          | 1.12       | -0.86      | -1.12 | -1.11 | -1.02 | -1.05 | -0.19 |       |       |    |
| GENE634X | 16117_at   | 16117_at   | 1     | -1.61 | -0.06 | -0.61 | -0.84 | -0.29 | -1.03 | -  |
|          | 1.42       | -1.11      | -1.74 | -1.51 | -1.26 | -1.53 | -0.52 |       |       |    |
| GENE633X | 17643_at   | 17643_at   | 1     | -1.38 | 0.11  | -0.74 | -1.33 | 0     | -1    | -  |
|          | 1.69       | -0.83      | -1.31 | -1.38 | -0.72 | -1.7  | -0.26 |       |       |    |
| GENE632X | 14512_r_at | 14512_r_at | 1     | -1.41 | -0.42 | -0.92 | -1.38 | -0.17 | -1.68 | -  |
|          | 2.07       | -1.29      | -1.6  | -1.65 | -1.6  | -2.37 | -0.42 |       |       |    |
| GENE617X | 17408_at   | 17408_at   | 1     | -1.22 | 0.21  | -2.49 | -1.3  | -0.54 | -2.36 | -  |
|          | 2.66       | -1.07      | -2.78 | -2.66 | -1.92 | -2.95 | -0.26 |       |       |    |
| GENE616X | 17361_s_at | 17361_s_at | 1     | -0.84 | 0.12  | -1.8  | -1.63 | -0.45 | -1.8  | -  |
|          | 2.53       | -0.45      | -2.07 | -1.88 | -2.13 | -2.27 | -1.06 |       |       |    |
| GENE839X | 13517_g_at | 13517_g_at | 1     | -0.75 | 0.15  | 0.44  | -0.4  | 0.05  | -1.08 | -  |
|          | 0.66       | 0.07       | -0.05 | -0.85 | -0.01 | -0.34 | -0.84 |       |       |    |
| GENE779X | 12103_at   | 12103_at   | 1     | -0.46 | 0.35  | 0.08  | -0.62 | 0.14  | -0.72 | -  |
|          | 1.58       | 0.35       | -0.06 | -1.14 | 0.35  | -0.88 | -0.37 |       |       |    |
| GENE778X | 15579_s_at | 15579_s_at | 1     | -0.39 | 0.64  | 0.31  | -0.57 | 0.24  | -0.57 | -  |
|          | 0.72       | 0.38       | -0.12 | -1.04 | -0.16 | -0.57 | -0.17 |       |       |    |
| GENE776X | 18197_at   | 18197_at   | 1     | -0.5  | 1.6   | 0.67  | -0.9  | 0.43  | -0.93 | -  |
|          | 0.84       | 0.2        | -0.45 | -0.9  | -0.07 | -0.77 | -1.21 |       |       |    |
| GENE775X | 16104_s_at | 16104_s_at | 1     | -0.31 | 0.87  | 0.48  | -0.25 | 0.33  | -0.1  | -  |
|          | 0.56       | 0.25       | -0.48 | -0.97 | -0.16 | -0.27 | -1.27 |       |       |    |
| GENE684X | 17292_at   | 17292_at   | 1     | -0.73 | 0.05  | 0.13  | -0.84 | 0.41  | 0.4   | -  |
|          | 0.83       | -0.17      | -0.86 | -0.66 | -0.21 | -1.52 | -1.4  |       |       |    |
| GENE683X | 17414_at   | 17414_at   | 1     | -0.27 | 0.59  | 0.33  | -0.28 | 0.26  | -0.06 | -  |
|          | 0.28       | 0.16       | -0.22 | -0.46 | -0.33 | -0.75 | -1.38 |       |       |    |
| GENE682X | 17594_s_at | 17594_s_at | 1     | -0.12 | 0.57  | -0.03 | -0.38 | 0.36  | -0.06 | -  |
|          | 0.12       | 0.18       | -0.53 | -0.36 | -0.4  | -0.84 | -1.28 |       |       |    |

|           |            |            |       |       |       |       |       |       |       |   |
|-----------|------------|------------|-------|-------|-------|-------|-------|-------|-------|---|
| GENE1113X | 13556_i_at | 13556_i_at | 1     | -0.51 | 0.61  | -0.37 | -0.47 | 0.3   | -1.13 | - |
| 0.35      | -0.19      | -0.04      | -0.93 | -0.91 | -0.58 | -1.09 |       |       |       |   |
| GENE1112X | 15175_s_at | 15175_s_at | 1     | -0.42 | 0.32  | -0.58 | -1.18 | 0.28  | -1.1  | - |
| 0.87      | -0.16      | -0.58      | -1.04 | -1.22 | -1.44 | -1.96 |       |       |       |   |
| GENE1111X | 20209_at   | 20209_at   | 1     | -0.29 | 0.59  | -0.39 | -0.26 | 0.18  | -1.24 | - |
| 0.63      | -0.16      | -0.39      | -0.95 | -1.79 | -1.44 | -1.61 |       |       |       |   |
| GENE774X  | 13633_at   | 13633_at   | 1     | -0.36 | 0.43  | 0.38  | -0.66 | 0.09  | 0.02  | - |
| 0.71      | 0          | -0.36      | -1.1  | -0.87 | -0.44 | -0.84 |       |       |       |   |
| GENE773X  | 20674_s_at | 20674_s_at | 1     | -0.36 | 0.47  | 0.46  | -0.29 | 0.19  | -0.28 | - |
| 0.72      | -0.55      | -0.57      | -0.63 | -0.76 | -0.5  | -1.18 |       |       |       |   |
| GENE772X  | 18507_s_at | 18507_s_at | 1     | -0.58 | 0.89  | 0.69  | -1.17 | -0.05 | -0.76 | - |
| 1.43      | -0.55      | -0.5       | -1.94 | -2.22 | -1.5  | -2.72 |       |       |       |   |
| GENE771X  | 12757_at   | 12757_at   | 1     | -0.95 | 0.72  | -0.05 | -0.84 | -0.07 | -0.79 | - |
| 1.76      | -0.55      | -0.61      | -1.97 | -1.18 | -0.41 | -1.37 |       |       |       |   |
| GENE770X  | 18503_at   | 18503_at   | 1     | -0.89 | 0.61  | -0.12 | -1.43 | 0     | -1.75 | - |
| 2.43      | -0.92      | -0.88      | -2.75 | -1.66 | -2.04 | -1.8  |       |       |       |   |
| GENE837X  | 18826_at   | 18826_at   | 1     | -0.57 | -0.07 | -0.1  | -0.62 | -0.31 | -0.27 | - |
| 0.51      | -0.1       | -0.54      | -0.73 | -0.16 | -0.4  | -1.21 |       |       |       |   |
| GENE836X  | 18760_at   | 18760_at   | 1     | -0.59 | 0     | 0     | -0.61 | -0.1  | -0.25 | - |
| 0.86      | -0.24      | -0.47      | -0.84 | -0.34 | -0.37 | -1.41 |       |       |       |   |
| GENE608X  | 14056_at   | 14056_at   | 1     | -0.62 | 0.04  | -0.24 | -0.98 | 0.06  | -0.06 | - |
| 1.2       | -0.57      | -0.54      | -0.91 | -0.36 | -0.32 | -1.31 |       |       |       |   |
| GENE830X  | 15880_at   | 15880_at   | 1     | -1.51 | -0.88 | -0.88 | -3.32 | -1.41 | -2.26 | - |
| 2.2       | -2.26      | -2.26      | -3.58 | -2.26 | -1.41 | -3.6  |       |       |       |   |
| GENE599X  | 19910_at   | 19910_at   | 1     | -0.92 | -0.33 | 0.28  | -1.35 | -0.48 | -0.49 | - |
| 1.31      | -1.74      | -0.44      | -1.55 | -1.87 | -0.73 | -2.39 |       |       |       |   |
| GENE598X  | 13619_at   | 13619_at   | 1     | -1.26 | -0.95 | -1    | -2.9  | -0.69 | -0.86 | - |
| 2.44      | -3.76      | -2         | -2.1  | -3.76 | -2    | -4.64 |       |       |       |   |
| GENE610X  | 14354_at   | 14354_at   | 1     | -0.27 | -0.07 | -0.21 | -0.28 | -0.08 | 0.11  | - |
| 0.27      | -0.46      | -0.4       | -0.77 | -0.39 | -0.21 | -1    |       |       |       |   |
| GENE609X  | 19363_at   | 19363_at   | 1     | -0.44 | -0.13 | -1.05 | -0.44 | -0.18 | -0.39 | - |
| 0.91      | -1.45      | -1.18      | -1.62 | -1.13 | -0.94 | -2.36 |       |       |       |   |
| GENE744X  | 20490_at   | 20490_at   | 1     | -0.88 | 0.02  | -0.42 | -0.59 | 0.34  | -0.71 | - |
| 0.67      | -0.58      | -1.04      | -1.18 | -0.73 | -1.4  | -1.46 |       |       |       |   |
| GENE743X  | 17660_at   | 17660_at   | 1     | -1.21 | -0.62 | -1.27 | -1.02 | -0.07 | -1.05 | - |
| 0.91      | -1         | -1.68      | -2.08 | -0.86 | -2.53 | -2.8  |       |       |       |   |
| GENE742X  | 19400_at   | 19400_at   | 1     | -0.51 | -0.01 | -0.48 | -0.67 | 0.15  | -0.53 | - |
| 0.76      | -0.38      | -0.58      | -0.82 | -0.66 | -0.72 | -1.05 |       |       |       |   |
| GENE741X  | 15490_at   | 15490_at   | 1     | -0.77 | 0.18  | -1.19 | -1.33 | 0     | -0.94 | - |
| 1.33      | -0.68      | -2.12      | -1.61 | -0.9  | -1.77 | -2.26 |       |       |       |   |
| GENE740X  | 20205_at   | 20205_at   | 1     | -1.07 | 0.15  | -1.73 | -1.92 | 0.24  | -1.73 | - |
| 2.44      | -1.29      | -2.58      | -1.78 | -1.58 | -2.58 | -3.02 |       |       |       |   |
| GENE739X  | 15864_at   | 15864_at   | 1     | -0.18 | -0.01 | -0.38 | -0.62 | 0.14  | -0.18 | - |
| 0.76      | -0.31      | -0.86      | -0.83 | -0.7  | -1.11 | -1.21 |       |       |       |   |
| GENE738X  | 13634_s_at | 13634_s_at | 1     | -0.7  | 0.08  | -0.7  | -0.95 | 0.31  | -1.37 | - |
| 1.05      | -0.66      | -2.12      | -1.51 | -1.8  | -2.04 | -3.26 |       |       |       |   |
| GENE607X  | 16382_at   | 16382_at   | 1     | -0.9  | -0.27 | -0.38 | -1.15 | 0.04  | -0.09 | - |
| 1.75      | -1.04      | -1.1       | -1.56 | -0.95 | -1.73 | -2.06 |       |       |       |   |
| GENE606X  | 17670_at   | 17670_at   | 1     | -1    | 0.11  | -0.55 | -1.16 | 0.16  | -0.55 | - |
| 1.44      | -1.47      | -1.29      | -1.44 | -1.05 | -1.29 | -1.56 |       |       |       |   |
| GENE605X  | 13012_s_at | 13012_s_at | 1     | -0.41 | -0.04 | -0.19 | -0.76 | 0.1   | -0.29 | - |
| 0.64      | -0.68      | -0.41      | -1.07 | -0.87 | -0.83 | -1.4  |       |       |       |   |
| GENE604X  | 17199_at   | 17199_at   | 1     | -0.79 | 0.09  | -0.09 | -1.53 | 0.19  | -1    | - |
| 1.53      | -1         | -1.41      | -2.11 | -1.48 | -1.67 | -2.62 |       |       |       |   |
| GENE674X  | 19075_at   | 19075_at   | 1     | -0.42 | -0.21 | 0     | -0.26 | -0.13 | -0.51 | - |
| 0.47      | -0.2       | -0.39      | -0.39 | -0.71 | -1.07 | -1.36 |       |       |       |   |

|           |            |            |       |       |       |       |       |         |       |    |
|-----------|------------|------------|-------|-------|-------|-------|-------|---------|-------|----|
| GENE673X  | 17169_at   | 17169_at   | 1     | -0.63 | -0.12 | -0.04 | -0.66 | -0.14   | -0.36 | -  |
| 0.73      | -0.47      | -0.63      | -0.69 | -0.72 | -1    | -1.7  |       |         |       |    |
| GENE672X  | 17382_at   | 17382_at   | 1     | -0.6  | 0.46  | -0.2  | -0.54 | -0.28   | -0.32 | -  |
| 1.16      | -0.62      | -0.81      | -1.54 | -1.28 | -2.58 | -3.4  |       |         |       |    |
| GENE735X  | 19691_at   | 19691_at   | 1     | -0.66 | 0.24  | -0.9  | -1.27 | -0.04   | -1.48 | -  |
| 0.63      | -1         | -1.63      | -1.32 | -1.54 | -2.48 | -2.22 |       |         |       |    |
| GENE734X  | 17769_s_at | 17769_s_at | 1     | -0.68 | -0.03 | -0.89 | -0.72 | -0.39   | -0.96 | -  |
| 0.57      | -1.2       | -1.47      | -1.33 | -1.71 | -2.28 | -2.15 |       |         |       |    |
| GENE733X  | 12598_at   | 12598_at   | 1     | -0.44 | 0.47  | -0.71 | -0.9  | -0.06   | -1.67 | -  |
| 0.66      | -1.08      | -1.58      | -1.39 | -2.08 | -1.97 | -2.47 |       |         |       |    |
| GENE732X  | 14010_at   | 14010_at   | 1     | -0.36 | 0.38  | -0.84 | -0.55 | 0.38    | -0.58 | -  |
| 0.8       | -1         | -1         | -0.65 | -0.92 | -1.17 | -1.38 |       |         |       |    |
| GENE731X  | 15566_at   | 15566_at   | 1     | -0.95 | 1.26  | -1.71 | -1.22 | -0.23   | -1.71 | -  |
| 1.32      | -2.43      | -2.84      | -1.42 | -2.43 | -2.84 | -3.26 |       |         |       |    |
| GENE226X  | 14654_s_at | 14654_s_at | 1     | -0.14 | -0.01 | -0.11 | -0.64 | -0.34   | -0.53 | -  |
| 0.62      | -1.37      | -0.93      | -0.45 | -1.26 | -1.14 | -1.48 |       |         |       |    |
| GENE222X  | 16042_s_at | 16042_s_at | 1     | -0.36 | 0.2   | -0.62 | -0.2  | -0.63   | -1.74 | -  |
| 0.93      | -1.76      | -1.79      | -1.02 | -2.23 | -2.47 | -3.23 |       |         |       |    |
| GENE221X  | 20638_at   | 20638_at   | 1     | -0.41 | 0.53  | -1    | -0.5  | 0       | -2.26 | -  |
| 1.21      | -2.43      | -2.26      | -0.87 | -2.43 | -2.26 | -3.6  |       |         |       |    |
| GENE597X  | 15210_s_at | 15210_s_at | 1     | -0.5  | 0.22  | 0.31  | -0.81 | -0.14   | -0.35 | -  |
| 0.66      | -0.94      | -0.5       | -0.72 | -1.18 | -1.04 | -1.11 |       |         |       |    |
| GENE596X  | 17033_at   | 17033_at   | 1     | -0.82 | 0.5   | 0.18  | -1.12 | 0.00723 |       | -  |
| 0.51      | -0.93      | -0.99      | -0.86 | -0.73 | -1.24 | -1.42 | -1.21 |         |       |    |
| GENE594X  | 19809_at   | 19809_at   | 1     | -1.06 | -0.06 | 0.1   | -1.02 | -0.13   | -0.44 | -  |
| 1.24      | -1.16      | -0.72      | -0.86 | -1.16 | -1.33 | -1.06 |       |         |       |    |
| GENE592X  | 19362_at   | 19362_at   | 1     | -0.55 | 0.06  | 0.03  | -0.51 | -0.3    | -0.42 | -1 |
| -1.15     | -0.6       | -0.79      | -1.37 | -1.28 | -0.75 |       |       |         |       |    |
| GENE591X  | 20523_at   | 20523_at   | 1     | -0.72 | -0.31 | 0.02  | -0.92 | -0.15   | -0.45 | -  |
| 1.55      | -1.77      | -0.91      | -0.82 | -2.06 | -1.4  | -1.46 |       |         |       |    |
| GENE590X  | 13335_at   | 13335_at   | 1     | -0.48 | 0.19  | -0.07 | -0.52 | -0.01   | -0.42 | -  |
| 0.96      | -0.9       | -1.45      | -1.09 | -1.52 | -2.07 | -1.76 |       |         |       |    |
| GENE589X  | 19209_s_at | 19209_s_at | 1     | -0.55 | 0.31  | 0.12  | -0.61 | -0.01   | -0.6  | -  |
| 1.03      | -0.82      | -1         | -1.28 | -1.64 | -2.13 | -2.19 |       |         |       |    |
| GENE588X  | 20615_at   | 20615_at   | 1     | -0.48 | 0.12  | 0.15  | -0.37 | 0.07    | -0.78 | -  |
| 1.27      | -1.1       | -1         | -1.27 | -1.34 | -2.14 | -1.08 |       |         |       |    |
| GENE587X  | 18917_i_at | 18917_i_at | 1     | -0.56 | 0.23  | 0.05  | -0.84 | -0.12   | -0.71 | -  |
| 1.59      | -1.01      | -1.36      | -1.24 | -2.2  | -2.58 | -1.69 |       |         |       |    |
| GENE586X  | 18441_s_at | 18441_s_at | 1     | -0.37 | -0.01 | 0.43  | -0.7  | 0.14    | -0.01 | -  |
| 0.67      | -1.32      | -0.92      | -0.7  | -1.44 | -1.72 | -1.2  |       |         |       |    |
| GENE585X  | 13785_at   | 13785_at   | 1     | -1.72 | -0.39 | 1.22  | -1.19 | -0.04   | 0.05  | -  |
| 1.72      | -1.96      | -1.76      | -1.51 | -2.15 | -3.35 | -3.42 |       |         |       |    |
| GENE1474X | 18549_s_at | 18549_s_at | 1     | -0.09 | -0.56 | -0.59 | 0.71  | -0.76   | -0.42 | -  |
| 0.4       | -0.83      | -1.12      | -0.28 | -0.5  | -1.18 | 0.15  |       |         |       |    |
| GENE1473X | 16347_at   | 16347_at   | 1     | 0.22  | -0.73 | -0.59 | 0.53  | -0.96   | -0.97 |    |
| 0.15      | -1.9       | -1.5       | 0.47  | -0.96 | -3.15 | 0.24  |       |         |       |    |
| GENE1472X | 20292_at   | 20292_at   | 1     | 0.28  | -0.79 | -0.84 | 0.15  | -0.67   | -0.45 | -  |
| 0.29      | -1.23      | -1.32      | 0.45  | -1.29 | -1.67 | 0.19  |       |         |       |    |
| GENE1471X | 16348_at   | 16348_at   | 1     | 0.55  | -0.58 | -1.12 | 0.52  | -0.82   | -1.12 |    |
| 0.1       | -1.01      | -1.86      | 0.38  | -1.31 | -2.12 | -0.24 |       |         |       |    |
| GENE1470X | 19180_at   | 19180_at   | 1     | 0.09  | -1    | -1.61 | 0.27  | -0.47   | -1.29 | -  |
| 0.1       | -1.61      | -1.86      | 0.53  | -1.52 | -2.09 | -0.58 |       |         |       |    |
| GENE1469X | 15493_at   | 15493_at   | 1     | -0.13 | -1.16 | -1.69 | 0.71  | -1.16   | -1.22 |    |
| 0.34      | -1.85      | -2.62      | 0.71  | -1.97 | -2.76 | -0.32 |       |         |       |    |
| GENE1468X | 17917_s_at | 17917_s_at | 1     | -0.07 | -0.74 | -0.86 | -0.38 | -0.5    | -0.6  | -  |
| 0.06      | -0.94      | -1.21      | -0.12 | -0.86 | -1.19 | 0.81  |       |         |       |    |



|           |            |            |       |       |       |       |         |       |       |   |
|-----------|------------|------------|-------|-------|-------|-------|---------|-------|-------|---|
| GENE1467X | 15046_s_at | 15046_s_at | 1     | 0.09  | -0.39 | -1.02 | -0.12   | -0.1  | -0.28 | - |
|           | 0.21       | -1.33      | -1.36 | -0.06 | -0.86 | -1.1  | 0.32    |       |       |   |
| GENE1466X | 13550_at   | 13550_at   | 1     | 0.18  | -1.86 | -2.92 | 0.72    | -1.21 | -1.59 |   |
|           | 0.34       | -1.84      | -2.46 | 0.95  | -1.29 | -2.43 | -0.03   |       |       |   |
| GENE1465X | 12926_s_at | 12926_s_at | 1     | 0.12  | -1.73 | -2.35 | 0.18    | -1.15 | -1.13 | - |
|           | 0.21       | -1.58      | -1.88 | 0.29  | -1.9  | -2    | -0.18   |       |       |   |
| GENE1464X | 14064_at   | 14064_at   | 1     | -0.78 | -3.48 | -3.5  | -0.24   | -1.67 | -2.38 | - |
|           | 0.78       | -3.06      | -3.5  | 1.98  | -2.74 | -3.28 | -0.67   |       |       |   |
| GENE1463X | 18969_g_at | 18969_g_at | 1     | -0.26 | -3.29 | -2.56 | 1       | -2.56 | -1.79 | - |
|           | 0.26       | -2.71      | -3.35 | 1.22  | -2.71 | -3.06 | 2.67    |       |       |   |
| GENE1462X | 18968_at   | 18968_at   | 1     | 0     | -3.7  | -3.15 | 0       | -2.43 | -2.51 | 0 |
|           | -3.7       | -4.24      | 0     |       | -3.43 | -3.28 | 2.72    |       |       |   |
| GENE1476X | 12422_at   | 12422_at   | 1     | 0.04  | -0.44 | -1.29 | -0.1    | -0.81 | -1.17 | 0 |
|           | -0.32      | -1.17      | 0.31  | 0.04  | -1.23 | 0.52  |         |       |       |   |
| GENE1475X | 16140_s_at | 16140_s_at | 1     | 0.08  | -0.39 | -1.01 | 0.14    | -0.5  | -0.54 | - |
|           | 0.2        | -0.23      | -1.16 | 0.17  | -0.24 | -1.31 | 0.74    |       |       |   |
| GENE1450X | 17726_at   | 17726_at   | 1     | 0.21  | -0.98 | -0.39 | -0.22   | -1.03 | -0.82 | - |
|           | 0.18       | -0.45      | -0.76 | -0.18 | -1.1  | -2.04 | 0.31    |       |       |   |
| GENE1449X | 17331_at   | 17331_at   | 1     | 0.15  | -1.02 | -1.21 | -0.79   | -1.2  | -1.28 | - |
|           | 1.11       | -1.06      | -1.86 | -1.11 | -1.67 | -2.76 | 0.82    |       |       |   |
| GENE1502X | 14492_s_at | 14492_s_at | 1     | -0.33 | -0.57 | -1.25 | -0.21   | 0.06  | -0.98 | - |
|           | 0.36       | -0.49      | -0.78 | -0.22 | 0.11  | -0.84 | -0.34   |       |       |   |
| GENE1501X | 16975_at   | 16975_at   | 1     | -0.24 | -0.81 | -2.2  | -0.33   | -0.01 | -1.27 | - |
|           | 0.41       | -1.15      | -1.7  | -0.04 | -0.41 | -1.51 | -0.68   |       |       |   |
| GENE1499X | 13156_f_at | 13156_f_at | 1     | 0.66  | -0.19 | -2.27 | 0.04    | 0.04  | -2.23 | - |
|           | 0.46       | 0.25       | -2.23 | 0.63  | -0.09 | -2.23 | -0.7    |       |       |   |
| GENE1498X | 14998_at   | 14998_at   | 1     | -0.02 | -0.12 | -1.15 | -0.1    | -0.49 | -1.08 | - |
|           | 0.24       | -0.28      | -2.05 | -0.1  | -0.09 | -1.88 | -0.84   |       |       |   |
| GENE1497X | 17901_at   | 17901_at   | 1     | 0.17  | -0.62 | -2.06 | -0.24   | -0.38 | -1.22 | - |
|           | 0.56       | -0.61      | -2.37 | -0.45 | -0.79 | -2.19 | -1.18   |       |       |   |
| GENE1500X | 13155_i_at | 13155_i_at | 1     | -0.18 | -0.61 | -1.05 | -0.05   | -0.78 | -0.76 | - |
|           | 0.33       | -0.29      | -0.84 | -0.02 | -0.15 | -1.02 | -0.24   |       |       |   |
| GENE1251X | 15591_s_at | 15591_s_at | 1     | -0.06 | -0.46 | -1.62 | 0.38    | -0.89 | -1.16 | - |
|           | 0.25       | -1.2       | -1.39 | 0.7   | -0.3  | -1.28 | -1.15   |       |       |   |
| GENE1250X | 15343_at   | 15343_at   | 1     | -0.36 | -0.72 | -1.71 | 0.04    | -0.6  | -1.03 | - |
|           | 0.33       | -0.82      | -1.15 | 0.18  | -0.62 | -1.2  | -1.01   |       |       |   |
| GENE1200X | 17415_at   | 17415_at   | 1     | -0.1  | -0.34 | -0.91 | 0.21    | -0.44 | -0.97 |   |
|           | 0.02       | -0.53      | -1.27 | -0.16 | -0.59 | -1.24 | -0.03   |       |       |   |
| GENE1199X | 12674_at   | 12674_at   | 1     | -0.11 | -0.67 | -1.52 | -0.11   | -0.48 | -1.27 | - |
|           | 0.27       | -1.17      | -2.67 | -0.19 | -1.04 | -1.92 | -0.61   |       |       |   |
| GENE1198X | 15601_s_at | 15601_s_at | 1     | -0.09 | -0.53 | -1.72 | 0.06    | -1.08 | -2.63 | - |
|           | 0.1        | -1.38      | -2.49 | 0.31  | -1.48 | -2.77 | -1.25   |       |       |   |
| GENE1197X | 18273_at   | 18273_at   | 1     | -0.15 | -0.35 | -1.36 | 0.00394 |       | -0.25 | - |
|           | 1.21       | -0.27      | -0.75 | -1.29 | -0.01 | -0.9  | -1.52   | -0.67 |       |   |
| GENE1196X | 16438_at   | 16438_at   | 1     | -0.2  | -1.61 | -5.3  | -0.06   | -0.95 | -5.01 | - |
|           | 0.51       | -2.77      | -5.01 | -0.26 | -2.47 | -5.66 | -2.47   |       |       |   |
| GENE1195X | 18637_at   | 18637_at   | 1     | -0.04 | -2.19 | -4.32 | 0.12    | -2    | -4.58 | 0 |
|           | -2.41      | -3.73      | 0.49  | -2    | -4.58 | -1.13 |         |       |       |   |
| GENE1572X | 15469_at   | 15469_at   | 1     | -0.28 | -1.03 | -1.22 | -0.25   | -0.7  | -0.34 |   |
|           | 0.09       | -1         | -0.86 | 0.04  | -0.51 | -0.08 | -0.25   |       |       |   |
| GENE1246X | 19199_at   | 19199_at   | 1     | -0.41 | -1.41 | -1.57 | -0.07   | -1.2  | -1.35 | - |
|           | 0.05       | -0.76      | -0.79 | -0.22 | -0.76 | -0.53 | -1.31   |       |       |   |
| GENE1344X | 17103_s_at | 17103_s_at | 1     | -0.59 | -1.07 | -0.98 | 0.25    | -0.51 | -0.48 | - |
|           | 1.03       | -0.36      | -0.31 | -0.04 | -0.4  | -0.27 | -0.37   |       |       |   |
| GENE1336X | 15096_at   | 15096_at   | 1     | -0.37 | -1.24 | -1    | 0.12    | -1.29 | -0.55 | - |
|           | 0.81       | -1.1       | -0.66 | -0.06 | -0.86 | -0.55 | -0.57   |       |       |   |

|           |            |            |       |       |       |       |       |       |       |   |
|-----------|------------|------------|-------|-------|-------|-------|-------|-------|-------|---|
| GENE1335X | 14677_r_at | 14677_r_at | 1     | -0.66 | -1.19 | -1.64 | 0.33  | -2.63 | -1.17 | - |
|           | 1.02       | -1.35      | -1.31 | -0.18 | -1.79 | -1.52 | -0.94 |       |       |   |
| GENE1334X | 15481_at   | 15481_at   | 1     | -0.58 | -1.39 | -1.84 | -0.08 | -1.67 | -2.17 | - |
|           | 1.17       | -2.7       | -1.54 | -0.36 | -1.85 | -1.32 | -0.13 |       |       |   |
| GENE1343X | 12993_s_at | 12993_s_at | 1     | -0.33 | -1.08 | -1.18 | -1.03 | -0.64 | -0.67 | - |
|           | 0.72       | -1.02      | -1.18 | -0.67 | -0.64 | -1.18 | -0.54 |       |       |   |
| GENE1342X | 14808_i_at | 14808_i_at | 1     | -1.14 | -1.86 | -1.32 | -1.29 | -1.1  | -1.38 | - |
|           | 1.41       | -1.69      | -1.5  | -1.04 | -0.65 | -1.6  | -0.9  |       |       |   |
| GENE1340X | 17475_at   | 17475_at   | 1     | -0.58 | -0.99 | -1.82 | -0.52 | -1.33 | -1.43 | - |
|           | 0.89       | -1.2       | -1.38 | -0.53 | -1.4  | -1.54 | -1.14 |       |       |   |
| GENE1339X | 13192_at   | 13192_at   | 1     | -1.24 | -2.1  | -3.78 | -1.4  | -2.58 | -3.3  | - |
|           | 0.96       | -2.32      | -2.4  | -1.4  | -1.9  | -2.1  | -1.37 |       |       |   |
| GENE1338X | 19669_at   | 19669_at   | 1     | -0.75 | -0.97 | -1.64 | -0.44 | -0.61 | -1.11 | - |
|           | 0.84       | -1.2       | -0.68 | -0.49 | -0.94 | -1.05 | -1    |       |       |   |
| GENE1341X | 13554_at   | 13554_at   | 1     | -0.63 | -0.87 | -1.81 | -0.37 | -0.57 | -1.32 | - |
|           | 0.75       | -0.73      | -1.23 | -0.82 | -0.76 | -1.02 | -0.42 |       |       |   |
| GENE1208X | 15271_at   | 15271_at   | 1     | -1.93 | -1.09 | -3.08 | -0.35 | -0.75 | -3.36 | - |
|           | 1.93       | -2.29      | -3.08 | -1.27 | -2.29 | -2.73 | -1.15 |       |       |   |
| GENE1459X | 12482_s_at | 12482_s_at | 1     | 0.48  | -0.08 | -0.46 | 0.51  | -0.04 | -0.25 | - |
|           | 0.27       | -0.8       | -1.29 | 0.23  | -0.87 | -1.15 | 0.33  |       |       |   |
| GENE1458X | 19955_at   | 19955_at   | 1     | 0.09  | 0.09  | -0.6  | 0.14  | 0.15  | -0.64 | - |
|           | 0.12       | -0.73      | -1.18 | -0.14 | -1    | -1.18 | 0.36  |       |       |   |
| GENE1457X | 15022_at   | 15022_at   | 1     | 0.3   | -0.09 | -0.78 | 0.39  | -0.45 | -1.13 | - |
|           | 0.25       | -0.94      | -1.33 | 0.18  | -1.3  | -2.05 | 0.39  |       |       |   |
| GENE1456X | 14008_at   | 14008_at   | 1     | 0.14  | -0.17 | -0.77 | 0.25  | -0.14 | -0.77 | - |
|           | 0.3        | -0.65      | -1.33 | -0.08 | -1.3  | -1.5  | 0.15  |       |       |   |
| GENE1454X | 19704_i_at | 19704_i_at | 1     | 0.06  | -0.06 | -0.49 | -0.09 | -0.17 | -0.72 | - |
|           | 0.12       | -1.29      | -1.77 | -0.02 | -1.65 | -2.58 | 1.48  |       |       |   |
| GENE1461X | 13214_at   | 13214_at   | 1     | 0.49  | -0.07 | 0.09  | 0.41  | -0.31 | -0.61 | - |
|           | 0.48       | -0.49      | -0.55 | -0.87 | -1.55 | 0.1   |       |       |       |   |
| GENE1455X | 19888_at   | 19888_at   | 1     | 0.35  | 0.19  | -0.54 | 0.56  | -0.08 | -0.71 | - |
|           | 0.11       | -0.37      | -0.71 | 0.31  | -0.88 | -1.5  | 0.58  |       |       |   |
| GENE1452X | 12540_at   | 12540_at   | 1     | 0.95  | -0.86 | -0.77 | 1     | -0.91 | -0.72 | - |
|           | 0.58       | -1.06      | -1.63 | 0.26  | -1.36 | -1.86 | 1.23  |       |       |   |
| GENE1451X | 20429_at   | 20429_at   | 1     | 1.04  | -0.37 | -0.64 | 0.95  | -0.46 | -0.51 | - |
|           | 0.43       | -1.18      | -1.68 | 0.65  | -1.47 | -1.89 | 0.52  |       |       |   |
| GENE1453X | 18469_at   | 18469_at   | 1     | 0.46  | -0.43 | -0.08 | 0.37  | -0.27 | -0.54 | - |
|           | 0.11       | -0.33      | -0.32 | 0.18  | -0.69 | -1.16 | 1     |       |       |   |
| GENE1460X | 12843_s_at | 12843_s_at | 1     | 0.01  | -0.06 | 0.38  | 0.3   | -0.76 | -0.5  | - |
|           | 0.1        | -0.32      | -0.65 | 0.19  | -1.21 | -0.86 | 0.5   |       |       |   |
| GENE1448X | 18913_s_at | 18913_s_at | 1     | 0.58  | 0     | 0.09  | -0.21 | -0.48 | -1.12 | - |
|           | 0.2        | -0.05      | -0.88 | -0.67 | -1.63 | -2.29 | 0     |       |       |   |
| GENE1447X | 17040_s_at | 17040_s_at | 1     | 0.53  | -0.43 | -0.01 | -0.29 | -0.78 | -0.69 | - |
|           | 0.18       | -0.45      | -0.78 | -0.59 | -1.75 | -1.85 | -0.24 |       |       |   |
| GENE1253X | 12738_r_at | 12738_r_at | 1     | 0.32  | 0.01  | 0.15  | -0.14 | -0.32 | -1.25 | - |
|           | 0.27       | -0.63      | -0.9  | 0.33  | -2.9  | -2.84 | -0.9  |       |       |   |
| GENE1291X | 18085_r_at | 18085_r_at | 1     | 0.32  | -0.59 | -0.02 | 0.38  | -0.59 | -0.22 | - |
|           | 0.09       | -1.06      | -0.6  | 0.22  | -1.34 | -1.31 | -0.51 |       |       |   |
| GENE1289X | 12768_at   | 12768_at   | 1     | -0.21 | -1    | -0.7  | 0.38  | -0.61 | -0.94 | - |
|           | 0.24       | -1.96      | -1.22 | 0.51  | -1.52 | -1.83 | -0.59 |       |       |   |
| GENE1288X | 17479_at   | 17479_at   | 1     | -0.03 | -0.29 | -0.33 | 0.2   | -0.38 | -0.32 | - |
|           | 0.57       | -1.25      | -0.84 | 0.03  | -1.4  | -1.3  | -0.17 |       |       |   |
| GENE1287X | 13529_at   | 13529_at   | 1     | -0.31 | -0.31 | -0.58 | 0.25  | -1.12 | -0.05 | - |
|           | 0.25       | -1.93      | -1.58 | 0.68  | -2.02 | -2.05 | -0.54 |       |       |   |
| GENE1293X | 20628_at   | 20628_at   | 1     | 0.52  | -0.37 | -0.31 | 0.59  | -0.46 | -0.46 | - |
|           | 0.17       | -1.89      | -1.65 | -0.11 | -2.17 | -2.13 | -0.77 |       |       |   |

|           |            |            |       |          |       |       |       |       |       |   |
|-----------|------------|------------|-------|----------|-------|-------|-------|-------|-------|---|
| GENE1292X | 20016_at   | 20016_at   | 1     | 0.05     | 0.18  | -0.66 | 0.66  | 0.03  | -0.19 | - |
|           | 0.14       | -1.92      | -1.87 | -0.04    | -2.17 | -2.68 | -0.54 |       |       |   |
| GENE911X  | 14538_r_at | 14538_r_at | 1     | -0.11    | -0.28 | -0.61 | 0.06  | 0.16  | -0.13 | - |
|           | 0.09       | -0.95      | -0.59 | 0.06     | -1.18 | -0.78 | -0.27 |       |       |   |
| GENE1298X | 18264_at   | 18264_at   | 1     | 0.09     | -0.38 | -0.06 | -0.23 | -0.18 | -0.11 | - |
|           | 0.24       | -1         | -1.09 | -0.02    | -1.3  | -1.7  | -1.17 |       |       |   |
| GENE1297X | 12781_at   | 12781_at   | 1     | -0.00114 |       | -0.23 | 0.09  | 0.06  | -0.23 | - |
|           | 0.09       | -0.39      | -1.44 | -1.23    | -0.41 | -1.65 | -1.88 | -1.4  |       |   |
| GENE1296X | 14714_s_at | 14714_s_at | 1     | -0.01    | -0.09 | -0.42 | -0.05 | -0.11 | -0.21 | - |
|           | 0.26       | -1.53      | -1.17 | -0.32    | -1.81 | -1.76 | -0.75 |       |       |   |
| GENE1295X | 18708_at   | 18708_at   | 1     | -0.24    | -0.03 | -0.67 | -0.29 | -0.23 | -0.84 | - |
|           | 0.26       | -2.28      | -2.18 | -0.27    | -2.58 | -3.1  | -2.38 |       |       |   |
| GENE1294X | 16460_s_at | 16460_s_at | 1     | -0.22    | -0.01 | -0.79 | -0.01 | -0.3  | -0.54 | - |
|           | 0.39       | -2.13      | -1.64 | -0.33    | -2.72 | -2.24 | -2.04 |       |       |   |
| GENE1290X | 17115_s_at | 17115_s_at | 1     | 0.24     | -0.05 | -0.36 | 0.4   | -0.51 | -0.19 | - |
|           | 0.18       | -1.26      | -0.92 | 0.08     | -1.82 | -1.07 | -0.91 |       |       |   |
| GENE905X  | 17399_at   | 17399_at   | 1     | -0.09    | -0.6  | -0.49 | 0.01  | -0.31 | -0.54 | - |
|           | 0.49       | -1.59      | -1.26 | -0.12    | -1.78 | -1.51 | -1.32 |       |       |   |
| GENE904X  | 12338_at   | 12338_at   | 1     | -0.41    | -0.61 | -1.06 | -0.06 | -0.46 | -0.83 | - |
|           | 1.13       | -3.02      | -2.2  | -0.48    | -3.03 | -2.72 | -2.15 |       |       |   |
| GENE903X  | 15607_s_at | 15607_s_at | 1     | -0.17    | -0.35 | -0.3  | -0.2  | -0.55 | -0.6  | - |
|           | 0.72       | -2.44      | -1.36 | -0.48    | -3.09 | -1.76 | -1.88 |       |       |   |
| GENE999X  | 13567_at   | 13567_at   | 1     | 0.00449  |       | -0.67 | -0.79 | -0.29 | -0.62 | - |
|           | 0.87       | -0.31      | -2.12 | -2.18    | -0.45 | -2.61 | -2.7  | -0.41 |       |   |
| GENE998X  | 18929_s_at | 18929_s_at | 1     | 0.14     | -0.39 | -0.78 | -0.36 | -0.48 | -1.63 | - |
|           | 0.62       | -2.77      | -2.37 | -0.96    | -2.95 | -2.79 | -0.15 |       |       |   |
| GENE936X  | 20155_s_at | 20155_s_at | 1     | -0.09    | -0.36 | -0.62 | 0.06  | -0.56 | -0.59 | - |
|           | 0.4        | -1.03      | -0.82 | -0.4     | -1.53 | -0.99 | 0.18  |       |       |   |
| GENE919X  | 19398_at   | 19398_at   | 1     | 0.02     | -1.35 | -0.7  | 0.2   | -0.39 | -0.61 | - |
|           | 0.3        | -1.42      | -1.18 | -0.34    | -1.63 | -1.47 | -0.15 |       |       |   |
| GENE918X  | 19379_at   | 19379_at   | 1     | 0.11     | -0.37 | -0.53 | 0.27  | -0.35 | -0.48 | - |
|           | 0.44       | -1.08      | -1.08 | -0.46    | -1.35 | -1.08 | -0.47 |       |       |   |
| GENE917X  | 13301_at   | 13301_at   | 1     | -0.33    | -1.54 | -0.83 | 0.03  | -1.34 | -1.71 | - |
|           | 0.86       | -3.19      | -2.45 | -0.77    | -2.45 | -3.03 | -1.39 |       |       |   |
| GENE916X  | 16583_s_at | 16583_s_at | 1     | -0.11    | -1.28 | -1.43 | -0.22 | -1.28 | -2.21 | - |
|           | 1.18       | -3.09      | -2.17 | -0.99    | -3.27 | -3.06 | -1.25 |       |       |   |
| GENE1180X | 12020_at   | 12020_at   | 1     | -0.34    | -0.58 | -1.12 | -0.3  | -0.63 | -0.75 | - |
|           | 0.46       | -0.96      | -1.23 | 0.32     | -1.4  | -0.83 | -0.69 |       |       |   |
| GENE1172X | 16921_at   | 16921_at   | 1     | -0.21    | -0.77 | -1.4  | 0     | -0.38 | -0.49 | - |
|           | 0.53       | -1.36      | -0.96 | -0.34    | -1.36 | -1.03 | -0.77 |       |       |   |
| GENE915X  | 15881_at   | 15881_at   | 1     | -0.35    | -0.72 | -0.56 | -0.07 | -0.99 | -0.84 | - |
|           | 0.49       | -1.57      | -1.09 | -0.04    | -1.57 | -1.08 | -0.6  |       |       |   |
| GENE914X  | 15520_s_at | 15520_s_at | 1     | -0.62    | -0.7  | -0.54 | -0.13 | -0.97 | -0.49 | - |
|           | 0.41       | -1.26      | -0.96 | -0.01    | -1.75 | -1.47 | -0.77 |       |       |   |
| GENE913X  | 15131_s_at | 15131_s_at | 1     | -0.88    | -1.56 | -1.32 | 0.18  | -1.39 | -1.95 | - |
|           | 0.77       | -2.77      | -1.83 | 0.4      | -2.31 | -2.67 | -1.95 |       |       |   |
| GENE912X  | 15817_at   | 15817_at   | 1     | -1.9     | -2.09 | -1.84 | 0.03  | -1.54 | -1.96 | - |
|           | 1.49       | -3.67      | -2.84 | -0.4     | -3.67 | -2.84 | -2.76 |       |       |   |
| GENE1171X | 16019_at   | 16019_at   | 1     | -0.29    | -0.58 | -1.09 | -0.52 | -0.62 | -1.13 | - |
|           | 0.68       | -1.63      | -1.67 | -0.73    | -1.64 | -1.63 | -0.99 |       |       |   |
| GENE1170X | 14269_at   | 14269_at   | 1     | -0.33    | -0.76 | -1.32 | -0.42 | -0.57 | -1.07 | - |
|           | 0.51       | -1.77      | -2.15 | -0.79    | -1.81 | -2.18 | -1.12 |       |       |   |
| GENE1169X | 19720_at   | 19720_at   | 1     | -0.22    | -0.76 | -1.12 | -0.6  | -0.86 | -1.08 | - |
|           | 0.47       | -1.73      | -1.88 | -0.5     | -1.78 | -1.5  | -0.78 |       |       |   |
| GENE1168X | 14519_at   | 14519_at   | 1     | -0.24    | -0.65 | -1.29 | -0.26 | -0.69 | -1.12 | - |
|           | 0.11       | -1.67      | -1.44 | -0.29    | -1.72 | -1.67 | -0.8  |       |       |   |

|           |            |            |       |       |       |          |       |       |       |    |
|-----------|------------|------------|-------|-------|-------|----------|-------|-------|-------|----|
| GENE1167X | 17573_at   | 17573_at   | 1     | -0.39 | -0.98 | -1.7     | -0.27 | -1    | -1.77 | -  |
| 0.63      | -2.18      | -2.17      | -0.69 | -2.47 | -1.92 | -1.2     |       |       |       |    |
| GENE1166X | 14066_at   | 14066_at   | 1     | -0.68 | -1.19 | -1.83    | -0.45 | -1.1  | -1.69 | -  |
| 0.62      | -2.54      | -2.41      | -0.42 | -3.25 | -2.41 | -1.76    |       |       |       |    |
| GENE1165X | 13561_at   | 13561_at   | 1     | -0.64 | -0.63 | -1.64    | -0.64 | -1.19 | -1.82 | -  |
| 1.22      | -2.6       | -2.37      | -0.83 | -2.86 | -2.03 | -1.38    |       |       |       |    |
| GENE1164X | 16593_at   | 16593_at   | 1     | -0.9  | -1.79 | -2.59    | -0.9  | -2.05 | -3.14 | -  |
| 1.98      | -4.64      | -3.26      | -1.64 | -3.96 | -3.26 | -2.1     |       |       |       |    |
| GENE1163X | 19695_at   | 19695_at   | 1     | -0.19 | -1.62 | -4.26    | -0.9  | -1.5  | -4.26 | -2 |
|           | -5.11      | -4.26      | -2.44 | -5.11 | -4.26 | -2.22    |       |       |       |    |
| GENE398X  | 17913_at   | 17913_at   | 1     | -0.5  | -0.66 | -1.64    | -0.38 | -0.73 | -1.86 | -  |
| 0.86      | -2.55      | -2.22      | -0.81 | -2.45 | -3.14 | -1.98    |       |       |       |    |
| GENE397X  | 17494_s_at | 17494_s_at | 1     | -0.24 | -0.47 | -1.8     | -0.39 | -1    | -2.18 | -  |
| 0.58      | -2.02      | -2.1       | -0.84 | -2.59 | -3.07 | -1.79    |       |       |       |    |
| GENE396X  | 13114_at   | 13114_at   | 1     | -0.35 | -0.89 | -2.5     | -0.3  | -1.2  | -3.08 | -  |
| 0.7       | -3.78      | -3.5       | -0.61 | -3.78 | -3.86 | -2.24    |       |       |       |    |
| GENE395X  | 12048_at   | 12048_at   | 1     | -0.49 | -1.19 | -2.34    | -0.4  | -1.47 | -2.7  | -  |
| 1.18      | -3.83      | -3.79      | -1.23 | -4.21 | -4.23 | -2.42    |       |       |       |    |
| GENE394X  | 13086_r_at | 13086_r_at | 1     | -0.79 | -0.79 | -2.28    | -0.56 | -0.92 | -1.83 | -  |
| 0.38      | -3.22      | -2.28      | -0.57 | -3.29 | -2.92 | -2.31    |       |       |       |    |
| GENE393X  | 13629_s_at | 13629_s_at | 1     | -0.65 | -0.73 | -1.8     | -0.64 | -0.88 | -2.1  | -  |
| 0.73      | -2.67      | -2.13      | -1.01 | -3.39 | -2.6  | -2.63    |       |       |       |    |
| GENE390X  | 19125_s_at | 19125_s_at | 1     | -0.28 | -0.65 | -1.72    | -0.35 | -0.96 | -1.42 | -  |
| 1.25      | -2.26      | -2.53      | -0.97 | -3.16 | -2.39 | -1.99    |       |       |       |    |
| GENE389X  | 12430_at   | 12430_at   | 1     | -0.2  | -0.78 | -2.65    | -0.37 | -1.38 | -2.27 | -  |
| 0.98      | -2.87      | -3.07      | -1.19 | -3.87 | -3.17 | -2.67    |       |       |       |    |
| GENE1224X | 17994_r_at | 17994_r_at | 1     | 0.23  | -0.36 | -0.57    | -0.16 | -0.65 | -0.75 | -  |
| 0.02      | -0.9       | -0.88      | 0.06  | -1.11 | -0.89 | -0.6     |       |       |       |    |
| GENE192X  | 15083_at   | 15083_at   | 1     | 0.1   | -0.79 | -1.02    | -0.5  | -0.6  | -1.24 | -  |
| 0.26      | -1.16      | -1.24      | -0.26 | -2.38 | -1.37 | -0.94    |       |       |       |    |
| GENE996X  | 17873_s_at | 17873_s_at | 1     | 0.03  | -0.51 | -0.76    | 0     | -0.15 | 0.32  | -  |
| 0.39      | -0.92      | -1.45      | 0.16  | -0.92 | -0.55 | 0.02     |       |       |       |    |
| GENE994X  | 18232_at   | 18232_at   | 1     | -0.41 | -0.48 | -0.12    | 0.11  | 0.14  | 0.13  | -  |
| 0.49      | -0.85      | -0.79      | -0.12 | -1.52 | -1.04 | 0.2      |       |       |       |    |
| GENE993X  | 13949_at   | 13949_at   | 1     | 0     | -0.9  | -0.16    | 0.61  | -0.48 | -0.14 | -  |
| 1.1       | -3.6       | -2         | -0.32 | -3.86 | -2.5  | 1.29     |       |       |       |    |
| GENE995X  | 13514_s_at | 13514_s_at | 1     | -0.18 | -0.61 | -1.09    | -0.31 | 0.3   | 0.65  | -  |
| 0.23      | -1.41      | -0.91      | -0.86 | -1.71 | -1.3  | -0.39    |       |       |       |    |
| GENE908X  | 13595_at   | 13595_at   | 1     | -0.27 | -0.57 | -0.55    | -0.65 | -0.47 | -0.08 | -  |
| 0.61      | -1.59      | -1.1       | -0.82 | -1.9  | -1.23 | -0.72    |       |       |       |    |
| GENE907X  | 15906_at   | 15906_at   | 1     | -0.47 | -0.87 | -1       | -1.19 | -0.38 | -0.45 | -  |
| 1.34      | -2.1       | -1.95      | -1.34 | -2.84 | -2.23 | -0.88    |       |       |       |    |
| GENE906X  | 17095_s_at | 17095_s_at | 1     | -0.49 | -0.51 | -0.78    | -0.66 | 0.26  | 0.07  | -  |
| 0.89      | -2.4       | -2.42      | -1.08 | -2.74 | -2.68 | -1       |       |       |       |    |
| GENE1052X | 15934_i_at | 15934_i_at | 1     | -1.43 | -0.34 | -0.63    | -0.58 | 0.07  | -0.36 | -  |
| 0.66      | -1.44      | -1.25      | -0.05 | -1.66 | -1.11 | 0.33     |       |       |       |    |
| GENE984X  | 14069_at   | 14069_at   | 1     | -0.84 | -0.2  | -0.13    | -0.11 | -0.3  | -1.23 | -1 |
|           | -1.62      | -0.48      | -0.27 | -1.05 | -0.79 | 0.04     |       |       |       |    |
| GENE983X  | 14717_s_at | 14717_s_at | 1     | -0.71 | -0.25 | -0.53    | -0.18 | -0.34 | -0.48 | -  |
| 0.99      | -1.57      | -0.73      | -0.24 | -1.21 | -0.55 | 0.55     |       |       |       |    |
| GENE985X  | 12815_at   | 12815_at   | 1     | -0.33 | -0.29 | -0.63    | 0.41  | -0.19 | -0.74 | -  |
| 0.67      | -1.49      | -0.37      | 0.63  | -0.97 | -0.87 | -0.16    |       |       |       |    |
| GENE939X  | 17433_at   | 17433_at   | 1     | -0.69 | -0.09 | -0.88    | 0.08  | -0.46 | -1.41 | -  |
| 1.04      | -1.3       | -0.68      | -0.12 | -1.6  | -1.5  | -0.00893 |       |       |       |    |
| GENE938X  | 13319_at   | 13319_at   | 1     | -0.43 | -0.63 | -0.94    | -0.06 | -0.83 | -1.06 | -  |
| 1.06      | -1.49      | -1.29      | -0.06 | -1.63 | -2.34 | 0        |       |       |       |    |

|           |            |            |          |       |       |       |       |       |       |   |
|-----------|------------|------------|----------|-------|-------|-------|-------|-------|-------|---|
| GENE937X  | 18924_at   | 18924_at   | 1        | -0.55 | -1.17 | -1.79 | -0.08 | -0.84 | -1.66 | - |
| 1.4       | -2.17      | -1.86      | -0.2     | -1.84 | -2.73 | -0.74 |       |       |       |   |
| GENE1511X | 20699_at   | 20699_at   | 1        | 0.23  | 0.05  | -0.86 | 0.3   | -0.39 | -1.72 |   |
| 0.33      | 0.48       | -0.37      | -0.5     | 0.21  | -1.08 | -0.69 |       |       |       |   |
| GENE1504X | 20068_at   | 20068_at   | 1        | -0.48 | -0.51 | -0.68 | -0.14 | -0.51 | -1.12 | - |
| 0.14      | 0.03       | -0.37      | -0.26    | 0.21  | -0.28 | -0.4  |       |       |       |   |
| GENE1505X | 15686_s_at | 15686_s_at | 1        | 0.03  | -0.05 | -0.75 | -0.17 | -0.34 | -1.24 | - |
| 0.06      | 0.12       | -0.41      | 0.8      | 0.16  | -0.64 | -0.53 |       |       |       |   |
| GENE1592X | 18624_at   | 18624_at   | 1        | -0.57 | 0.35  | 0.69  | -0.77 | -1.27 | -1.4  | - |
| 0.77      | 0.62       | 0.12       | -0.12    | -0.52 | -1    | -0.63 |       |       |       |   |
| GENE1114X | 15878_at   | 15878_at   | 1        | 0.07  | -0.16 | 0.27  | -0.73 | 0.07  | -0.72 | - |
| 0.41      | -0.16      | 0.24       | -0.07    | -0.45 | -0.45 | -1.12 |       |       |       |   |
| GENE1090X | 16367_i_at | 16367_i_at | 1        | -3.32 | -0.43 | -0.4  | 0     | -0.8  | -3.29 | - |
| 0.02      | -1.84      | -1.15      | -0.43    | -2.05 | -0.91 | -3.22 |       |       |       |   |
| GENE1503X | 12189_at   | 12189_at   | 1        | -0.25 | -0.14 | -0.29 | -0.51 | -0.77 | -1.23 | - |
| 0.49      | 0.03       | -0.33      | -0.2     | -0.32 | -0.66 | -0.9  |       |       |       |   |
| GENE838X  | 16579_at   | 16579_at   | 1        | -0.63 | -0.29 | 0.02  | -0.78 | -0.16 | -0.59 | - |
| 0.43      | 0.08       | -0.68      | -0.22    | -0.09 | -0.48 | -1.12 |       |       |       |   |
| GENE696X  | 16427_at   | 16427_at   | 1        | -0.24 | -0.06 | -0.1  | -0.3  | -0.52 | -1.01 | - |
| 0.53      | -0.19      | -1.02      | 0.04     | -0.65 | -2    | -2.48 |       |       |       |   |
| GENE659X  | 12968_at   | 12968_at   | 1        | -0.48 | -0.59 | 0.11  | -0.48 | -0.82 | -1.16 | - |
| 0.77      | -0.35      | -0.96      | -0.3     | -0.5  | -1.83 | -1.08 |       |       |       |   |
| GENE1578X | 13980_s_at | 13980_s_at | 1        | 0.1   | -0.34 | -1.37 | 0     | 0     | -0.79 |   |
| 0.21      | 0.05       | -0.84      | 0.1      | 0.28  | -0.79 | -1    |       |       |       |   |
| GENE1577X | 12154_at   | 12154_at   | 1        | 0.38  | -0.55 | -2    | 0.03  | 0     | -1.19 |   |
| 0.53      | 0.19       | -1.41      | 0.18     | 0.23  | 0     | -2.72 |       |       |       |   |
| GENE1576X | 17878_at   | 17878_at   | 1        | 0.08  | -0.07 | -0.96 | 0.61  | -0.1  | -0.09 |   |
| 0.09      | -0.41      | -0.78      | 0.21     | -0.3  | -0.37 | -1.49 |       |       |       |   |
| GENE1575X | 17386_at   | 17386_at   | 1        | 0.44  | -0.89 | -1.59 | 0.89  | 0.08  | -0.24 |   |
| 1.29      | -0.39      | -1.61      | 0.44     | -1.1  | -1.64 | -2.26 |       |       |       |   |
| GENE1158X | 12450_at   | 12450_at   | 1        | -0.01 | -0.5  | -0.97 | -0.16 | 0.03  | -0.66 | - |
| 0.2       | -0.4       | -1.29      | 0.12     | -0.18 | -1.17 | -1.42 |       |       |       |   |
| GENE1157X | 16504_at   | 16504_at   | 1        | -0.01 | -0.14 | -1.22 | -0.14 | 0.24  | -0.49 |   |
| 0.22      | -0.46      | -1.35      | -0.05    | -0.32 | -1.29 | -1    |       |       |       |   |
| GENE1156X | 16610_s_at | 16610_s_at | 1        | 0.9   | -0.93 | -2    | -0.29 | 1.67  | -1.07 | - |
| 0.11      | -1.39      | -3         | -0.32    | -1.22 | -3    | -3.2  |       |       |       |   |
| GENE1155X | 13562_at   | 13562_at   | 1        | 0.63  | -0.55 | -1.56 | 0.22  | -0.02 | -1.02 |   |
| 0.61      | -0.79      | -1.31      | 0.35     | -0.58 | -1.39 | -2.08 |       |       |       |   |
| GENE1153X | 19882_at   | 19882_at   | 1        | 0.48  | -0.75 | -2.01 | 0.67  | -0.6  | -2.14 |   |
| 0.26      | -1.41      | -2.8       | 0.13     | -1.47 | -2.59 | -2.45 |       |       |       |   |
| GENE1152X | 12118_at   | 12118_at   | 1        | 0.47  | -0.43 | -2.39 | 0.35  | 0.16  | -1.79 |   |
| 0.96      | -1.01      | -2.95      | 0.59     | -1.69 | -3.64 | -2.49 |       |       |       |   |
| GENE702X  | 20162_s_at | 20162_s_at | 1        | 0.44  | 0.1   | -0.55 | 0.39  | -0.11 | -0.6  |   |
| 0.28      | -0.55      | -0.81      | -0.00969 | -0.41 | -1.23 | -1.58 |       |       |       |   |
| GENE701X  | 15581_s_at | 15581_s_at | 1        | 0.27  | -0.14 | -0.28 | 0.09  | -0.43 | -0.75 |   |
| 0.13      | -0.44      | -0.71      | -0.00138 | -0.56 | -1.02 | -1.33 |       |       |       |   |
| GENE700X  | 14469_at   | 14469_at   | 1        | 0.56  | -0.61 | -1.88 | 0.41  | -0.48 | -2.3  |   |
| 0.69      | -1.92      | -2.62      | 0.49     | -2.55 | -3.04 | -4.49 |       |       |       |   |
| GENE764X  | 20143_at   | 20143_at   | 1        | -0.02 | 0     | -0.2  | -0.43 | 0.36  | -0.75 | - |
| 0.43      | 0.48       | -0.55      | -0.53    | 0.08  | -1.2  | -1.1  |       |       |       |   |
| GENE763X  | 19838_i_at | 19838_i_at | 1        | -0.25 | 0.36  | -0.83 | -0.36 | 0.74  | -0.79 | - |
| 0.8       | 0.05       | -0.94      | -0.25    | 0.05  | -1.28 | -0.67 |       |       |       |   |
| GENE762X  | 18008_r_at | 18008_r_at | 1        | -0.93 | 1.22  | -1.25 | -1.03 | 0.46  | -1.01 | - |
| 1.27      | 0.2        | -1.75      | -0.17    | -0.13 | -2.22 | -1.36 |       |       |       |   |
| GENE761X  | 18436_at   | 18436_at   | 1        | -0.86 | 0.72  | -0.55 | -0.47 | 0.9   | -0.4  | - |
| 0.79      | -0.07      | -1.17      | -0.65    | -0.07 | -1.38 | -1.11 |       |       |       |   |

|           |            |            |       |       |       |       |       |       |       |   |
|-----------|------------|------------|-------|-------|-------|-------|-------|-------|-------|---|
| GENE760X  | 15059_at   | 15059_at   | 1     | -0.83 | 0.63  | -0.29 | -0.3  | 0.44  | -0.65 | - |
| 0.57      | 0.09       | -0.9       | -0.35 | -0.3  | -1.34 | -1.25 |       |       |       |   |
| GENE759X  | 16065_at   | 16065_at   | 1     | -0.29 | 0.66  | -0.81 | -0.19 | 0.55  | -1.65 |   |
| 0.08      | 0.23       | -1.65      | 0.16  | -0.18 | -1.15 | -1.64 |       |       |       |   |
| GENE758X  | 17677_at   | 17677_at   | 1     | -0.06 | 0.28  | -0.56 | 0     | 0.15  | -0.33 | - |
| 0.12      | 0.25       | -0.95      | 0.06  | 0.03  | -1.04 | -1.46 |       |       |       |   |
| GENE757X  | 20542_at   | 20542_at   | 1     | 0     | 0.21  | -1.64 | -0.32 | 0.39  | -1.05 | 0 |
| 0.27      | -1.32      | 0          | -0.34 | -1.64 | -1.66 |       |       |       |       |   |
| GENE756X  | 14999_at   | 14999_at   | 1     | 0.02  | 0.49  | -0.78 | 0.28  | 0.18  | -0.66 |   |
| 0.07      | 0.07       | -0.94      | -0.18 | -0.38 | -1.1  | -1.07 |       |       |       |   |
| GENE755X  | 12130_at   | 12130_at   | 1     | 0.21  | 0.07  | -0.51 | -0.18 | -0.14 | -0.55 | 0 |
| -0.12     | -0.7       | -0.42      | -0.14 | -0.74 | -1.01 |       |       |       |       |   |
| GENE754X  | 19897_s_at | 19897_s_at | 1     | 0.13  | 0.46  | -0.65 | -0.3  | 0.42  | -0.88 | - |
| 0.39      | -0.22      | -1.22      | -0.48 | -0.28 | -1.07 | -1.47 |       |       |       |   |
| GENE753X  | 18250_at   | 18250_at   | 1     | -0.28 | 0.2   | -0.54 | -0.33 | 0.28  | -0.5  | - |
| 0.31      | -0.63      | -1.23      | -0.59 | -0.84 | -1.41 | -1.52 |       |       |       |   |
| GENE752X  | 13111_at   | 13111_at   | 1     | -0.5  | 0.2   | -0.83 | -0.46 | 0.2   | -0.86 | - |
| 0.53      | -0.39      | -1.5       | -0.54 | -0.91 | -2.28 | -1.86 |       |       |       |   |
| GENE751X  | 14946_at   | 14946_at   | 1     | -0.27 | 0.21  | -0.27 | -0.47 | 0.33  | -0.43 | - |
| 0.3       | -0.41      | -1.4       | -0.83 | -0.9  | -2.12 | -2.37 |       |       |       |   |
| GENE748X  | 20547_at   | 20547_at   | 1     | -0.42 | 0     | -1.04 | -0.8  | -0.41 | -0.78 | - |
| 0.95      | -0.67      | -1.78      | -1.73 | -0.54 | -1.63 | -2.32 |       |       |       |   |
| GENE746X  | 20298_at   | 20298_at   | 1     | -0.28 | -0.32 | -1.46 | -0.22 | -0.03 | -0.85 | - |
| 0.82      | -0.84      | -2.27      | -1.13 | -0.84 | -2.05 | -2.47 |       |       |       |   |
| GENE745X  | 12120_at   | 12120_at   | 1     | -0.45 | -0.46 | -1.09 | 0.02  | -0.36 | -0.75 | - |
| 0.84      | -0.82      | -1.67      | -1.24 | -1    | -1.6  | -2.46 |       |       |       |   |
| GENE705X  | 18402_at   | 18402_at   | 1     | 0.1   | -0.02 | -0.18 | 0.47  | 0.02  | -0.13 | - |
| 0.62      | -0.18      | -0.49      | -0.16 | -0.04 | -1.02 | -0.8  |       |       |       |   |
| GENE1406X | 14662_f_at | 14662_f_at | 1     | 0.05  | 0.07  | 0.42  | 0.03  | -0.04 | 0.21  | - |
| 0.00972   | -0.82      | -0.78      | 0.06  | -0.93 | -1.12 | -1.23 |       |       |       |   |
| GENE1405X | 15962_at   | 15962_at   | 1     | 0.27  | -0.05 | 0.4   | 0.13  | 0.23  | 0.61  |   |
| 0.12      | -0.78      | -0.62      | 0.08  | -1.06 | -1.05 | -1.05 |       |       |       |   |
| GENE1404X | 15989_at   | 15989_at   | 1     | 0.06  | 0.32  | 0.38  | 0.17  | 0.57  | 0.83  | - |
| 0.06      | -1.06      | -1.12      | 0.07  | -1.15 | -1.7  | -1.4  |       |       |       |   |
| GENE1403X | 12213_at   | 12213_at   | 1     | -0.11 | 0.18  | 0.05  | -0.04 | 0.25  | 0.39  | - |
| 0.52      | -1.29      | -0.65      | -0.24 | -1.14 | -0.77 | -1    |       |       |       |   |
| GENE1402X | 12769_at   | 12769_at   | 1     | 0.1   | 0.27  | 0.5   | -0.11 | 0.67  | 0.37  | - |
| 0.29      | -0.47      | -0.51      | 0.12  | -1.24 | -1.16 | -0.69 |       |       |       |   |
| GENE1401X | 14984_s_at | 14984_s_at | 1     | -0.05 | 0.48  | 0.83  | -0.02 | 0.42  | 0.49  | - |
| 0.3       | -1.12      | -0.24      | -0.23 | -1.92 | -1.03 | -0.77 |       |       |       |   |
| GENE1425X | 20561_at   | 20561_at   | 1     | 0.85  | 0.73  | 0.52  | 1.12  | 0.47  | -0.58 |   |
| 0.63      | -0.5       | -1.11      | 0.53  | -1.45 | -1.96 | -1.74 |       |       |       |   |
| GENE1426X | 17593_r_at | 17593_r_at | 1     | 0.36  | 0.12  | -0.15 | 0.48  | -0.05 | -0.71 |   |
| 0.53      | -0.47      | -0.71      | 0.27  | -1.39 | -0.84 | -1.2  |       |       |       |   |
| GENE1089X | 18937_at   | 18937_at   | 1     | 0.29  | 0.01  | 0.26  | 0.49  | -0.57 | -0.67 |   |
| 0.25      | -1.03      | -0.67      | 0.14  | -1.53 | -1.22 | -1.65 |       |       |       |   |
| GENE1286X | 12523_at   | 12523_at   | 1     | 0.55  | -0.06 | 0.39  | -0.16 | -0.37 | -0.58 |   |
| 0.35      | -2.22      | -1.63      | -0.12 | -2.06 | -1.4  | -1.07 |       |       |       |   |
| GENE1285X | 13103_at   | 13103_at   | 1     | 0.62  | 1.03  | -0.46 | 0.27  | -0.14 | -0.24 |   |
| 0.3       | -2.16      | -0.89      | -0.14 | -2.22 | -1.66 | -0.57 |       |       |       |   |
| GENE1333X | 16423_at   | 16423_at   | 1     | 0.33  | -0.14 | -0.07 | 0.4   | -0.51 | -0.17 |   |
| 0.22      | -0.69      | -0.59      | 0.2   | -0.79 | -1.14 | -0.69 |       |       |       |   |
| GENE1332X | 18079_g_at | 18079_g_at | 1     | 0.32  | -0.29 | -0.16 | 0.44  | -0.51 | -0.44 |   |
| 0.3       | -0.87      | -0.78      | 0.34  | -0.93 | -1.39 | -1.26 |       |       |       |   |
| GENE1331X | 16417_s_at | 16417_s_at | 1     | 0.36  | -0.22 | -0.03 | 0.51  | -0.27 | -0.04 |   |
| 0.29      | -0.79      | -0.9       | 0.18  | -0.79 | -1.39 | -1.21 |       |       |       |   |

|           |            |             |             |       |       |       |       |       |         |
|-----------|------------|-------------|-------------|-------|-------|-------|-------|-------|---------|
| GENE1327X | 18090_s_at | 18090_s_at  | 1           | 0.29  | -0.15 | -0.22 | 0.39  | -0.33 | -0.23   |
|           | 0.27       | -0.84 -1.03 | 0.02 -0.93  | -1.59 | -1.2  |       |       |       |         |
| GENE1330X | 15949_s_at | 15949_s_at  | 1           | 0.53  | -0.08 | -0.27 | 0.52  | -0.28 | -0.29   |
|           | 0.47       | -0.87 -1    | 0.19 -1     | -1.79 | -0.59 |       |       |       |         |
| GENE1329X | 15108_s_at | 15108_s_at  | 1           | 0.56  | -0.23 | -0.46 | 0.91  | -0.36 | -0.62   |
|           | 0.61       | -1.39 -1.29 | 0.46 -1.93  | -2.7  | -1.3  |       |       |       |         |
| GENE1326X | 14684_s_at | 14684_s_at  | 1           | 0.17  | -0.08 | -0.18 | 0.21  | -0.38 | -0.32   |
|           | 0.1        | -0.77 -0.86 | -0.13 -0.89 | -1.29 | -1.12 |       |       |       |         |
| GENE1325X | 16957_at   | 16957_at    | 1           | 0.28  | -0.18 | -0.27 | 0.26  | -0.35 | -0.47   |
|           | 0.12       | -1.14 -1.1  | -0.07 -1.19 | -1.48 | -1.15 |       |       |       |         |
| GENE1324X | 18078_at   | 18078_at    | 1           | 0.25  | -0.22 | -0.3  | 0.17  | -0.32 | -0.6    |
|           | 0.1        | -0.62 -0.78 | 0.18 -0.93  | -1.35 | -1.02 |       |       |       |         |
| GENE1323X | 12756_s_at | 12756_s_at  | 1           | 0.35  | -0.14 | -0.28 | 0.27  | -0.75 | -0.95   |
|           | 0.14       | -1.31 -1.14 | 0.17 -2.16  | -2.33 | -1.91 |       |       |       |         |
| GENE1321X | 18080_at   | 18080_at    | 1           | 0.11  | -0.46 | -0.35 | 0.23  | -0.65 | -0.92   |
|           | 0.04       | -1.08 -1.1  | -0.26 -1.15 | -1.64 | -1.62 |       |       |       |         |
| GENE1320X | 15133_at   | 15133_at    | 1           | -0.04 | -0.35 | -0.25 | 0.1   | -0.91 | -0.67 - |
|           | 0.36       | -1.1 -1.18  | 0.04 -1.16  | -1.89 | -1.57 |       |       |       |         |
| GENE1319X | 18077_at   | 18077_at    | 1           | 0.11  | -0.7  | -0.22 | 0.13  | -0.84 | -0.25   |
|           | 0.14       | -1.19 -0.81 | -0.06 -1.51 | -1.92 | -1.56 |       |       |       |         |
| GENE1328X | 16044_s_at | 16044_s_at  | 1           | 0.15  | -0.19 | -0.27 | 0.24  | -0.38 | -0.34   |
|           | 0.19       | -0.69 -0.92 | 0.11 -0.66  | -1.42 | -1.3  |       |       |       |         |
| GENE1322X | 16503_at   | 16503_at    | 1           | 0.21  | -0.34 | -0.5  | 0.19  | -0.48 | -0.42   |
|           | 0.2        | -0.92 -1.06 | -0.06 -0.99 | -1.53 | -1.53 |       |       |       |         |
| GENE1273X | 16428_at   | 16428_at    | 1           | 0.1   | -0.52 | -0.8  | 0.09  | -0.49 | -0.78   |
|           | 0.03       | -1.05 -1.59 | 0.14 -1.32  | -2.25 | -1.78 |       |       |       |         |
| GENE1272X | 12796_s_at | 12796_s_at  | 1           | 0.23  | -0.63 | -1.36 | 0.2   | -0.32 | -0.72   |
|           | 0.2        | -1.45 -2.16 | 0.18 -1.96  | -3    | -2.87 |       |       |       |         |
| GENE1264X | 16690_g_at | 16690_g_at  | 1           | -0.33 | 0.35  | -0.37 | 0.02  | -0.2  | -0.24   |
|           | 0.23       | -0.27 -0.77 | 0.19 -0.41  | -1.48 | -0.87 |       |       |       |         |
| GENE1263X | 12549_s_at | 12549_s_at  | 1           | 0.05  | 0.42  | -0.26 | 0.01  | 0.08  | -0.44 - |
|           | 0.07       | -0.51 -1.33 | -0.14 -1.03 | -2.55 | -1.52 |       |       |       |         |
| GENE1262X | 17978_s_at | 17978_s_at  | 1           | 0.3   | -0.23 | -1.05 | 0.27  | 0.11  | -0.01   |
|           | 0.3        | -0.72 -2.09 | 0.01 -1.76  | -3.94 | -2.2  |       |       |       |         |
| GENE1299X | 16266_at   | 16266_at    | 1           | 0.22  | 0.22  | -0.52 | 0.15  | 0.26  | -0.31 0 |
|           | -0.67      | -0.74 0.24  | -1.02 -1.21 | -0.76 |       |       |       |       |         |
| GENE1301X | 13121_at   | 13121_at    | 1           | 0.13  | -0.07 | -0.45 | 0.42  | -0.19 | -0.64 - |
|           | 0.1        | -0.89 -1.04 | 0 -0.79     | -1.57 | -0.83 |       |       |       |         |
| GENE1300X | 14993_at   | 14993_at    | 1           | 0     | 0.37  | -0.58 | 0.27  | -0.04 | -0.97 - |
|           | 0.4        | -0.83 -0.86 | -0.13 -1    | -2.08 | -1.09 |       |       |       |         |
| GENE1275X | 20665_s_at | 20665_s_at  | 1           | 0.1   | -0.04 | -0.64 | 0.07  | -0.06 | -0.41 - |
|           | 0.16       | -0.72 -1.23 | 0.06 -0.95  | -1.39 | -0.91 |       |       |       |         |
| GENE1274X | 16041_s_at | 16041_s_at  | 1           | 0.01  | 0.11  | -0.88 | 0.2   | -0.18 | -0.64   |
|           | 0.07       | -0.75 -1.51 | -0.16 -1    | -1.67 | -1.41 |       |       |       |         |
| GENE1271X | 14051_at   | 14051_at    | 1           | -0.11 | 0.41  | -0.79 | 0.06  | 0.11  | -0.96 - |
|           | 0.00692    | -0.89 -1.79 | -0.35 -1.55 | -2.27 | -1.7  |       |       |       |         |
| GENE1270X | 16899_at   | 16899_at    | 1           | 0.11  | 0.14  | -1.15 | -0.04 | 0.14  | -1.12 - |
|           | 0.27       | -1.56 -2.18 | -0.44 -1.69 | -3.07 | -1.85 |       |       |       |         |
| GENE704X  | 15835_at   | 15835_at    | 1           | 0.41  | 0.25  | -0.67 | 0.19  | 0.5   | -1.35 - |
|           | 0.49       | -0.77 -1.02 | -0.26 -0.71 | -1.49 | -1.88 |       |       |       |         |
| GENE703X  | 20020_at   | 20020_at    | 1           | 0.18  | -0.1  | -0.34 | 0.35  | 0.19  | -0.58 - |
|           | 0.32       | -0.7 -0.88  | -0.77 -0.94 | -1.36 | -1.39 |       |       |       |         |
| GENE1278X | 18725_s_at | 18725_s_at  | 1           | 0.04  | 0.28  | -0.49 | 0.18  | 0.16  | -0.49 - |
|           | 0.41       | -0.67 -0.89 | -0.23 -1.19 | -1.55 | -1.41 |       |       |       |         |
| GENE1276X | 19365_s_at | 19365_s_at  | 1           | -0.14 | 0.24  | -0.43 | -0.14 | 0.48  | -0.28 - |
|           | 0.35       | -0.89 -2.03 | -0.27 -2.03 | -2.93 | -3.21 |       |       |       |         |

|           |            |            |       |         |       |       |       |       |         |   |
|-----------|------------|------------|-------|---------|-------|-------|-------|-------|---------|---|
| GENE1269X | 20284_at   | 20284_at   | 1     | -0.13   | 0.1   | -0.87 | -0.17 | 0.04  | -0.93   | - |
|           | 0.07       | -0.94      | -2.33 | -0.28   | -1.76 | -2.84 | -2.81 |       |         |   |
| GENE1279X | 15898_at   | 15898_at   | 1     | 0.37    | -0.02 | -0.29 | 0.26  | -0.07 | -0.08   | - |
|           | 0.15       | -0.71      | -1.05 | -0.13   | -0.94 | -1.02 | -1.05 |       |         |   |
| GENE1267X | 16005_at   | 16005_at   | 1     | -0.17   | -0.14 | -0.41 | -0.05 | 0.46  | 0.43    | - |
|           | 0.52       | -1.18      | -1.63 | -0.27   | -1.38 | -1.88 | -1.84 |       |         |   |
| GENE1266X | 20196_at   | 20196_at   | 1     | 0       | -0.28 | -0.26 | -0.11 | 0     | -0.34   | - |
|           | 0.82       | -1.22      | -1.85 | -0.96   | -1.63 | -2.38 | -1.36 |       |         |   |
| GENE1265X | 17032_s_at | 17032_s_at | 1     | -0.12   | 0.29  | -0.18 | -0.29 | 0.39  | -0.43   | - |
|           | 0.67       | -1.75      | -2.33 | -0.27   | -2.29 | -2.67 | -1.59 |       |         |   |
| GENE228X  | 20363_at   | 20363_at   | 1     | 0.05    | 0.08  | -0.25 | -0.28 | -0.12 | -0.44   | - |
|           | 0.54       | -0.51      | -1.22 | -0.28   | -1.09 | -0.8  | -1.07 |       |         |   |
| GENE227X  | 17923_s_at | 17923_s_at | 1     | -0.69   | 0.92  | 0.23  | -0.81 | 0.49  | -0.74   | - |
|           | 1.14       | -1.69      | -3.37 | -0.92   | -2.18 | -3.37 | -3.32 |       |         |   |
| GENE1419X | 15861_at   | 15861_at   | 1     | 0.6     | -0.13 | -0.33 | 0.33  | -0.61 | -0.54   |   |
|           | 0.56       | -0.86      | -0.48 | 0.1     | -0.73 | -0.35 | -1.75 |       |         |   |
| GENE1418X | 18063_i_at | 18063_i_at | 1     | 0.55    | 0.35  | -0.09 | 0.11  | -0.6  | 0       |   |
|           | 0.65       | -0.79      | -0.04 | -0.09   | -1.16 | -0.24 | -1.95 |       |         |   |
| GENE1420X | 12763_s_at | 12763_s_at | 1     | 0.44    | -0.16 | 0.29  | 0.21  | -0.2  | 0.47    |   |
|           | 0.53       | -0.41      | -0.04 | 0.47    | -0.45 | -0.35 | -1.39 |       |         |   |
| GENE1361X | 17488_at   | 17488_at   | 1     | 0.23    | -0.48 | -0.11 | 0.54  | -0.09 | 0.67    | - |
|           | 0.2        | -0.85      | -1.17 | 0.2     | -0.75 | -0.75 | -1.9  |       |         |   |
| GENE1434X | 18699_i_at | 18699_i_at | 1     | 0.16    | 0.36  | 0.14  | 0.31  | 0.21  | 0.1     |   |
|           | 0.3        | -0.04      | -0.19 | 0.19    | -0.2  | -0.57 | -1.59 |       |         |   |
| GENE1433X | 16431_at   | 16431_at   | 1     | 0.24    | 0.08  | 0.48  | 0.46  | 0.05  | -0.02   |   |
|           | 0.43       | -0.15      | -0.31 | 0.31    | -0.39 | -1.16 | -3.23 |       |         |   |
| GENE1432X | 12753_at   | 12753_at   | 1     | 0.22    | 0.19  | 0.29  | 0.2   | 0.06  | 0.1     |   |
|           | 0.34       | -0.15      | -0.42 | 0.09    | -0.53 | -0.94 | -2.82 |       |         |   |
| GENE1431X | 16279_at   | 16279_at   | 1     | 0.54    | 0.54  | -0.45 | 0.71  | 1.05  | -0.28   |   |
|           | 0.92       | 0.7        | -0.85 | 0.64    | -0.62 | -1.92 | -4.45 |       |         |   |
| GENE1430X | 12299_at   | 12299_at   | 1     | 1       | 0.45  | 0.07  | 0.72  | 0.2   | -0.01   |   |
|           | 0.73       | 0.04       | -0.81 | 0.32    | -0.78 | -1.47 | -2.5  |       |         |   |
| GENE1427X | 20521_at   | 20521_at   | 1     | 0.32    | 0.69  | -0.14 | 0     | 0.35  | -0.57   |   |
|           | 0.31       | 0.26       | 0.01  | 0.16    | -0.49 | -0.28 | -1.71 |       |         |   |
| GENE708X  | 14073_at   | 14073_at   | 1     | -0.06   | 0.2   | -0.25 | 0.06  | 0.26  | -0.16   | - |
|           | 0.18       | 0.11       | -0.31 | -0.17   | 0.07  | -0.47 | -1.29 |       |         |   |
| GENE707X  | 20631_s_at | 20631_s_at | 1     | -0.1    | 0.14  | -0.16 | 0.28  | 0.23  | -0.42   | - |
|           | 0.09       | 0.02       | -0.32 | 0.06    | -0.14 | -0.38 | -1.15 |       |         |   |
| GENE706X  | 17348_at   | 17348_at   | 1     | -0.11   | -0.16 | -0.65 | -0.11 | 0.24  | 0.12    | - |
|           | 0.16       | 0.24       | -0.45 | -0.58   | -0.29 | -0.52 | -1.89 |       |         |   |
| GENE1424X | 20184_at   | 20184_at   | 1     | -0.14   | 0.17  | 0.22  | -0.09 | -0.13 | -0.14   |   |
|           | 0.09       | -0.23      | -0.08 | -0.13   | -0.33 | -0.56 | -1.22 |       |         |   |
| GENE1423X | 19190_g_at | 19190_g_at | 1     | 0.09    | 0.1   | 0.36  | 0.43  | -0.12 | -0.11   |   |
|           | 0.23       | -0.29      | -0.12 | 0.27    | -0.66 | -0.88 | -1.75 |       |         |   |
| GENE1421X | 15194_s_at | 15194_s_at | 1     | -0.02   | 0.21  | -0.03 | 0.13  | -0.25 | -0.19   | - |
|           | 0.22       | -0.73      | -0.46 | 0.22    | -1    | -1.06 | -2.01 |       |         |   |
| GENE1429X | 20635_s_at | 20635_s_at | 1     | 0.47    | 0.12  | 0.05  | 0.36  | 0.16  | 0.26    |   |
|           | 0.5        | -0.28      | -1.1  | -0.03   | -1.1  | -2.59 | -3.1  |       |         |   |
| GENE1422X | 18701_s_at | 18701_s_at | 1     | -0.03   | -0.04 | 0.14  | 0.05  | -0.04 | 0.00908 |   |
|           | 0.12       | -0.54      | -0.42 | 0.00579 | -0.61 | -1.12 | -2.05 |       |         |   |
| GENE692X  | 16432_g_at | 16432_g_at | 1     | 0.16    | 0.5   | 0.23  | 0.4   | 0.09  | -0.45   |   |
|           | 0.42       | -0.29      | -1.3  | -0.11   | -0.81 | -2.08 | -3.97 |       |         |   |
| GENE691X  | 12754_g_at | 12754_g_at | 1     | 0.18    | 0.11  | -0.07 | 0.1   | -0.03 | -0.07   |   |
|           | 0.36       | -0.51      | -1.1  | -0.2    | -1.01 | -1.7  | -3.57 |       |         |   |
| GENE681X  | 12160_at   | 12160_at   | 1     | -0.32   | 0.29  | 0.51  | -0.37 | -0.02 | 0.15    | - |
|           | 0.27       | -0.67      | -0.23 | -0.47   | -0.67 | -0.8  | -1.3  |       |         |   |



|           |            |            |       |       |       |       |       |         |          |   |
|-----------|------------|------------|-------|-------|-------|-------|-------|---------|----------|---|
| GENE680X  | 15145_s_at | 15145_s_at | 1     | -0.46 | 0.01  | 0.1   | -0.77 | 0.07    | 0.35     | - |
|           | 0.17       | -0.6       | -0.69 | -0.39 | -1.29 | -1.01 | -2.81 |         |          |   |
| GENE679X  | 19858_s_at | 19858_s_at | 1     | -0.04 | 0.15  | 0.09  | -0.13 | 0.33    | -0.37    | - |
|           | 0.13       | -0.19      | -0.3  | -0.32 | -0.59 | -0.78 | -1.13 |         |          |   |
| GENE678X  | 15237_at   | 15237_at   | 1     | -0.12 | 0.72  | -0.09 | -0.08 | 0.44    | -0.48    | - |
|           | 0.49       | -0.71      | -0.86 | -0.46 | -0.71 | -1.38 | -1.83 |         |          |   |
| GENE677X  | 20456_at   | 20456_at   | 1     | 0.4   | 0.9   | 0.09  | -0.02 | 0.27    | -0.51    | - |
|           | 0.15       | -0.73      | -1.1  | -0.22 | -1.23 | -1.97 | -2.27 |         |          |   |
| GENE676X  | 12675_s_at | 12675_s_at | 1     | -0.13 | 0.59  | 0.58  | 0.04  | 0.54    | -0.11    | - |
|           | 0.31       | -0.53      | -0.79 | -0.55 | -1.07 | -0.91 | -1.73 |         |          |   |
| GENE675X  | 14393_at   | 14393_at   | 1     | -0.46 | 1.29  | 1.02  | -0.73 | 0.68    | -0.01    | - |
|           | 1.62       | -3.1       | -2.44 | -1.07 | -4.5  | -3.85 | -5.11 |         |          |   |
| GENE1356X | 12275_s_at | 12275_s_at | 1     | -0.16 | -0.74 | -0.64 | 0.12  | -0.49   | -0.34    | - |
|           | 0.38       | -0.27      | -0.42 | -0.23 | -0.25 | -0.35 | -1.67 |         |          |   |
| GENE1355X | 15554_at   | 15554_at   | 1     | -0.38 | -1.66 | -1.03 | -0.02 | -1.17   | -0.56    | - |
|           | 0.48       | -0.71      | -0.28 | 0.49  | -0.7  | -0.43 | -2.36 |         |          |   |
| GENE1350X | 19949_at   | 19949_at   | 1     | -0.34 | -0.8  | -0.84 | 0.33  | -0.91   | -0.61    | - |
|           | 0.03       | -0.91      | -1.17 | 0.1   | -1.29 | -1.05 | -1.45 |         |          |   |
| GENE1349X | 13178_at   | 13178_at   | 1     | -0.54 | -0.92 | -0.88 | 0.3   | -0.83   | -0.82    | - |
|           | 0.31       | -1.07      | -0.72 | 0.16  | -1.37 | -0.93 | -1.77 |         |          |   |
| GENE1348X | 12011_s_at | 12011_s_at | 1     | -0.1  | -0.5  | -0.51 | 0.44  | -0.31   | -0.28    | - |
|           | 0.27       | -0.86      | -0.63 | -0.21 | -0.9  | -0.76 | -1.1  |         |          |   |
| GENE1347X | 20190_at   | 20190_at   | 1     | -0.13 | -1.56 | -1.57 | 0.67  | -0.82   | -1.01    | - |
|           | 0.4        | -2.26      | -1.75 | 0.32  | -1.82 | -1.39 | -3.17 |         |          |   |
| GENE1346X | 18030_i_at | 18030_i_at | 1     | 0.11  | -1.54 | -1.53 | 0     | -1.2    | -1.79    | - |
|           | 0.64       | -2.74      | -2.37 | -0.51 | -2.48 | -1.89 | -3.17 |         |          |   |
| GENE1345X | 18031_r_at | 18031_r_at | 1     | 0.16  | -1.73 | -1.26 | 0.16  | -1.24   | -1.21    | - |
|           | 0.61       | -2.37      | -1.7  | -0.61 | -2.67 | -1.85 | -2.62 |         |          |   |
| GENE1252X | 12304_at   | 12304_at   | 1     | -0.81 | -1.67 | -1.22 | 0     | -1.54   | -1.34    | - |
|           | 0.9        | -2.67      | -2.48 | -0.58 | -0.75 | -2.22 | -3.37 |         |          |   |
| GENE1360X | 19987_at   | 19987_at   | 1     | -0.58 | -0.71 | -0.48 | 0.04  | -0.21   | -0.58    | - |
|           | 0.23       | -1.35      | -0.65 | 0.27  | -0.79 | -0.81 | -2.2  |         |          |   |
| GENE1249X | 16422_at   | 16422_at   | 1     | -0.47 | -0.44 | -1.08 | 0.22  | -0.26   | -0.8     | - |
|           | 0.33       | -1.24      | -0.9  | 0.7   | -0.97 | -1.06 | -1.58 |         |          |   |
| GENE1351X | 19880_at   | 19880_at   | 1     | 0.1   | -1.35 | -1.38 | 0.49  | -1.02   | -1.5     | - |
|           | 0.16       | -2.78      | -1    | -0.43 | -1.58 | -0.76 | -1.76 |         |          |   |
| GENE1248X | 17944_at   | 17944_at   | 1     | -0.05 | -0.59 | -1.37 | 0.14  | -0.43   | -0.48    | - |
|           | 0.05       | -0.84      | -0.89 | -0.03 | -0.3  | -0.7  | -1.1  |         |          |   |
| GENE1247X | 17938_at   | 17938_at   | 1     | 0.02  | -0.75 | -1.48 | -0.03 | -0.35   | -0.53    | - |
|           | 0.2        | -1.09      | -0.67 | -0.15 | -0.59 | -0.53 | -1.03 |         |          |   |
| GENE1154X | 12171_at   | 12171_at   | 1     | 0.39  | -0.44 | -1.76 | 0.25  | 0.17    | -1.09    | - |
|           | 0.04       | -1.4       | -1.37 | -0.2  | -1.18 | -1.15 | -1.73 |         |          |   |
| GENE1282X | 12174_at   | 12174_at   | 1     | -0.11 | -0.09 | -0.02 | -0.05 | 0.00495 |          | - |
|           | 0.03       | -0.32      | -0.46 | -0.45 | -0.23 | -0.59 | -0.82 | -1.08   |          |   |
| GENE1281X | 20474_at   | 20474_at   | 1     | 0.16  | -0.26 | -0.18 | 0.04  | -0.21   | -0.06    | - |
|           | 0.34       | -1.24      | -0.86 | -0.4  | -1.07 | -1.6  | -1.94 |         |          |   |
| GENE1277X | 19439_at   | 19439_at   | 1     | 0.19  | 0.01  | -0.05 | 0.09  | -0.23   | -0.34    | - |
|           | 0.27       | -1.02      | -1.29 | -0.26 | -1.64 | -2.08 | -2.26 |         |          |   |
| GENE1280X | 15987_at   | 15987_at   | 1     | -0.14 | -0.13 | 0.06  | 0.08  | -0.15   | -0.07    | - |
|           | 0.31       | -1.16      | -0.64 | -0.45 | -1.71 | -1.41 | -1.66 |         |          |   |
| GENE1284X | 18700_r_at | 18700_r_at | 1     | -0.05 | -0.15 | -0.04 | 0.01  | -0.28   | -0.12    | - |
|           | 0.08       | -0.59      | -0.43 | 0.01  | -0.75 | -0.96 | -1.45 |         |          |   |
| GENE1283X | 18084_s_at | 18084_s_at | 1     | 0.18  | -0.25 | 0.07  | 0.31  | -0.28   | -0.00627 | - |
|           | 0.22       | -0.87      | -0.67 | -0.04 | -0.88 | -1.31 | -1.48 |         |          |   |
| GENE688X  | 17002_at   | 17002_at   | 1     | 0.27  | -0.02 | -0.53 | 0.38  | -0.01   | -0.43    | - |
|           | 0.23       | -1.4       | -1.65 | 0.04  | -1.66 | -2.27 | -3.2  |         |          |   |

|           |            |                   |             |       |       |       |       |       |       |   |
|-----------|------------|-------------------|-------------|-------|-------|-------|-------|-------|-------|---|
| GENE687X  | 17449_at   | 17449_at          | 1           | 0.24  | 0.1   | -0.34 | 0.14  | -0.12 | -0.4  |   |
|           | 0.2        | -1.08 -1.39       | -0.21 -1.7  | -2    | -2.62 |       |       |       |       |   |
| GENE686X  | 14916_at   | 14916_at          | 1           | 0.14  | 0.2   | -0.39 | 0.11  | 0.15  | -0.1  |   |
|           | 0.28       | -0.72 -1.52       | -0.11 -1.53 | -2.89 | -3.32 |       |       |       |       |   |
| GENE685X  | 13577_s_at | 13577_s_at        | 1           | 0.33  | -0.19 | -0.49 | 0.33  | -0.11 | -0.48 |   |
|           | 0.09       | -1.09 -1.58       | -0.13 -2.02 | -3.2  | -4.12 |       |       |       |       |   |
| GENE1260X | 13362_s_at | 13362_s_at        | 1           | -0.02 | -0.22 | -0.21 | 0.02  | -0.52 | -0.38 |   |
|           | 0.17       | -0.19 -0.38       | -0.3 -1.16  | -1.51 | -1.28 |       |       |       |       |   |
| GENE667X  | 20437_at   | 20437_at          | 1           | 0.13  | -1    | -0.39 | 0.3   | -1.11 | -0.41 | - |
|           | 0.92       | -1.26 -1.3 -3     | -2.69 -4.79 | -4.8  |       |       |       |       |       |   |
| GENE699X  | 19981_at   | 19981_at          | 1           | 0.07  | 0.19  | -0.38 | 0.23  | -0.19 | -0.55 | - |
|           | 0.07       | -0.54 -0.84 -0.24 | -0.77 -1.08 | -1.54 |       |       |       |       |       |   |
| GENE698X  | 16960_at   | 16960_at          | 1           | 0.24  | -0.1  | -0.29 | 0.06  | -0.33 | -0.84 | - |
|           | 0.01       | -0.91 -1.16 -0.43 | -1.12 -1.5  | -2.12 |       |       |       |       |       |   |
| GENE671X  | 15202_s_at | 15202_s_at        | 1           | 0.05  | 0.12  | -0.4  | -0.12 | -0.25 | -0.43 | - |
|           | 0.28       | -0.23 -0.71 -0.54 | -0.72 -0.76 | -1.33 |       |       |       |       |       |   |
| GENE670X  | 18019_s_at | 18019_s_at        | 1           | -0.12 | -0.08 | -0.32 | -0.12 | -0.16 | -0.07 | - |
|           | 0.24       | -0.47 -0.89 -0.67 | -0.65 -1.01 | -1.31 |       |       |       |       |       |   |
| GENE669X  | 15776_at   | 15776_at          | 1           | -0.29 | -0.31 | -0.56 | -0.45 | -0.07 | -0.31 | - |
|           | 0.34       | -1.05 -1.89 -0.65 | -1.3 -2.36  | -3.58 |       |       |       |       |       |   |
| GENE668X  | 12774_at   | 12774_at          | 1           | -0.12 | -0.41 | -1.16 | -0.21 | -0.26 | -0.39 | - |
|           | 0.18       | -1.14 -2.06 -0.39 | -1.86 -2.74 | -3.74 |       |       |       |       |       |   |
| GENE1353X | 14945_at   | 14945_at          | 1           | 0.05  | -0.33 | -0.4  | 0.42  | -0.68 | -1.25 |   |
|           | 0.07       | -0.43 -0.38       | 0.07 -1     | -0.86 | -1.54 |       |       |       |       |   |
| GENE1101X | 13662_at   | 13662_at          | 1           | -0.25 | -0.48 | -0.57 | 0.1   | -1.04 | -1.47 | - |
|           | 0.46       | -1.22 -0.99 -0.39 | -1.67 -1.8  | -3.38 |       |       |       |       |       |   |
| GENE697X  | 20054_at   | 20054_at          | 1           | -0.06 | 0.09  | -0.92 | 0.23  | -0.21 | -2.13 | - |
|           | 0.16       | -1.13 -1.37 -0.09 | -1.65 -1.66 | -3.82 |       |       |       |       |       |   |
| GENE695X  | 16513_at   | 16513_at          | 1           | -0.6  | -0.55 | -1.84 | -0.19 | -0.48 | -1.43 | - |
|           | 0.32       | -0.63 -1.66 -0.2  | -0.8 -1.66  | -4.37 |       |       |       |       |       |   |
| GENE694X  | 12886_s_at | 12886_s_at        | 1           | -0.19 | -0.14 | -1.28 | -0.4  | -0.69 | -1.54 | - |
|           | 0.59       | -0.66 -1.76 -0.45 | -0.99 -2.36 | -3.8  |       |       |       |       |       |   |
| GENE693X  | 15122_at   | 15122_at          | 1           | -0.06 | 0.02  | -0.48 | 0.13  | 0.07  | -0.48 |   |
|           | 0.05       | -0.45 -0.82       | 0.09 -0.54  | -1.31 | -2.42 |       |       |       |       |   |
| GENE690X  | 17966_at   | 17966_at          | 1           | 0.19  | -0.31 | -1.02 | 0.13  | -0.05 | -0.61 |   |
|           | 0.1        | -0.64 -1.72       | 0.13 -1.16  | -2.47 | -3.04 |       |       |       |       |   |
| GENE689X  | 17961_at   | 17961_at          | 1           | 0.21  | -0.91 | -1.32 | 0.32  | -0.33 | -0.42 |   |
|           | 0.23       | -1.29 -2.2        | 0.22 -1.97  | -2.59 | -4.26 |       |       |       |       |   |
| GENE1358X | 17411_s_at | 17411_s_at        | 1           | -0.5  | -0.49 | -0.52 | -0.42 | -0.53 | -0.68 | - |
|           | 0.52       | -1.11 -1.15 -0.34 | -1.19 -1.81 | -3.57 |       |       |       |       |       |   |
| GENE1357X | 18560_at   | 18560_at          | 1           | -0.76 | -0.05 | -0.47 | -0.33 | -0.32 | -0.47 | - |
|           | 0.81       | -1.66 -0.91 -0.32 | -1.7 -1.41  | -3.96 |       |       |       |       |       |   |
| GENE1359X | 20149_at   | 20149_at          | 1           | -0.57 | -0.53 | -0.6  | 0.03  | -0.37 | -0.53 | - |
|           | 0.33       | -1.18 -0.72 -0.18 | -1.41 -0.47 | -2.49 |       |       |       |       |       |   |
| GENE1092X | 15094_s_at | 15094_s_at        | 1           | -1.22 | -0.9  | -1.77 | -0.9  | -1.24 | -1.54 | - |
|           | 1.73       | -2.08 -1.51 -0.77 | -3.08 -1.58 | -4.83 |       |       |       |       |       |   |
| GENE1354X | 14023_at   | 14023_at          | 1           | -0.06 | -0.24 | -0.45 | 0.04  | -0.08 | -0.48 |   |
|           | 0.24       | -0.66 -0.17       | -0.2 -0.7   | -0.7  | -1.22 |       |       |       |       |   |
| GENE1107X | 18629_s_at | 18629_s_at        | 1           | 0.08  | -0.2  | -0.06 | -0.13 | -0.38 | -0.46 | - |
|           | 0.15       | -0.89 -0.25 -0.34 | -1.12 -1.06 | -1.3  |       |       |       |       |       |   |
| GENE1106X | 14921_at   | 14921_at          | 1           | 0.05  | -0.48 | -0.23 | -0.08 | -0.54 | -0.29 | - |
|           | 0.24       | -1 -0.41 -0.29    | -1.37 -0.67 | -1.48 |       |       |       |       |       |   |
| GENE546X  | 19632_at   | 19632_at          | 1           | -0.19 | -0.14 | -0.52 | 0.15  | -0.63 | -0.71 | - |
|           | 0.15       | -0.9 -0.78 -0.49  | -1.33 -0.69 | -1.44 |       |       |       |       |       |   |
| GENE545X  | 15160_s_at | 15160_s_at        | 1           | -0.96 | -0.64 | -1.81 | 0.24  | -1.19 | -1.74 | - |
|           | 0.83       | -2.49 -1.45 -0.55 | -3.94 -2.91 | -4.26 |       |       |       |       |       |   |

|           |            |            |       |         |       |       |       |       |       |   |
|-----------|------------|------------|-------|---------|-------|-------|-------|-------|-------|---|
| GENE1123X | 17566_at   | 17566_at   | 1     | -0.59   | -1    | -1.49 | 0.05  | -1.08 | -0.98 | - |
|           | 0.55       | -1.95      | -2.57 | -0.31   | -2.22 | -3.15 | -2.23 |       |       |   |
| GENE513X  | 20340_at   | 20340_at   | 1     | -0.36   | -0.46 | -0.74 | 0.21  | -0.66 | -0.59 | - |
|           | 0.7        | -1.75      | -1.7  | -0.36   | -1.94 | -2.36 | -2.07 |       |       |   |
| GENE1127X | 12036_at   | 12036_at   | 1     | -0.1    | -0.58 | -0.91 | -0.05 | -0.58 | -0.81 | - |
|           | 0.28       | -1.44      | -1.84 | -0.26   | -1.47 | -2.12 | -1.5  |       |       |   |
| GENE1126X | 18734_s_at | 18734_s_at | 1     | -0.08   | -0.54 | -1.51 | -0.1  | -0.96 | -1.31 | - |
|           | 0.27       | -2.14      | -2.58 | -0.36   | -2.15 | -3.16 | -2.22 |       |       |   |
| GENE1124X | 18220_s_at | 18220_s_at | 1     | 0.00261 |       | -0.66 | -1.28 | -0.19 | -0.94 | - |
|           | 1.38       | -0.37      | -2.15 | -2.47   | -0.73 | -2.31 | -3.25 | -2.23 |       |   |
| GENE437X  | 18274_s_at | 18274_s_at | 1     | 0.01    | -1.05 | -1.51 | -0.32 | -1.05 | -1.63 | - |
|           | 0.51       | -2.39      | -2.64 | -0.5    | -2.3  | -3.02 | -2.51 |       |       |   |
| GENE430X  | 18683_s_at | 18683_s_at | 1     | 0.14    | -1.15 | -2.1  | -0.39 | -0.8  | -1.82 | - |
|           | 0.5        | -2.79      | -3.17 | -0.86   | -3.6  | -4.76 | -3.63 |       |       |   |
| GENE444X  | 17468_at   | 17468_at   | 1     | -0.11   | -0.26 | -0.73 | -0.06 | -0.42 | -0.94 | - |
|           | 0.24       | -1.01      | -1.31 | -0.12   | -1.26 | -1.51 | -1.48 |       |       |   |
| GENE432X  | 14563_at   | 14563_at   | 1     | 0.23    | -0.5  | -0.87 | -0.29 | -0.67 | -1.27 | - |
|           | 0.21       | -1.71      | -1.94 | -0.19   | -2.05 | -2.49 | -2.27 |       |       |   |
| GENE520X  | 12453_at   | 12453_at   | 1     | -0.27   | -0.27 | -0.51 | -0.07 | -0.11 | -0.51 | 0 |
|           | -0.7       | -0.54      | -0.27 | -0.83   | -1.12 | -0.83 |       |       |       |   |
| GENE519X  | 18985_g_at | 18985_g_at | 1     | -0.43   | -0.6  | -1.13 | -0.28 | -0.95 | -1.09 | - |
|           | 0.66       | -2.6       | -1.39 | -0.47   | -2.33 | -2.98 | -2.08 |       |       |   |
| GENE517X  | 17385_at   | 17385_at   | 1     | -0.17   | -0.35 | -0.51 | -0.22 | -0.62 | -0.67 | - |
|           | 0.4        | -1.04      | -0.79 | -0.41   | -1.22 | -1.14 | -1.14 |       |       |   |
| GENE516X  | 13663_s_at | 13663_s_at | 1     | -0.55   | -0.91 | -1.09 | -0.35 | -1.29 | -0.86 | - |
|           | 0.78       | -1.68      | -1.37 | -0.51   | -2    | -2.04 | -2.24 |       |       |   |
| GENE512X  | 20576_at   | 20576_at   | 1     | -0.06   | -0.83 | -0.92 | 0.02  | -0.91 | -1.2  | - |
|           | 0.41       | -2.36      | -1.87 | -0.27   | -2.46 | -2.37 | -2.33 |       |       |   |
| GENE511X  | 19924_at   | 19924_at   | 1     | -0.58   | -0.89 | -1    | 0.18  | -1.24 | -1.92 | - |
|           | 1.03       | -2.89      | -2.66 | -0.68   | -2.53 | -2.92 | -3.04 |       |       |   |
| GENE510X  | 18976_at   | 18976_at   | 1     | -0.58   | -0.59 | -0.94 | -0.12 | -1.15 | -1.79 | - |
|           | 1.22       | -2.67      | -2.28 | -0.53   | -2.92 | -3.19 | -3.38 |       |       |   |
| GENE440X  | 15368_at   | 15368_at   | 1     | -0.19   | -0.74 | -1.09 | 0.1   | -0.58 | -0.87 | - |
|           | 0.34       | -1.54      | -1.4  | -0.4    | -1.39 | -1.56 | -1.5  |       |       |   |
| GENE439X  | 20704_at   | 20704_at   | 1     | -0.39   | -1.24 | -1.54 | -0.23 | -1.33 | -1.66 | - |
|           | 0.84       | -2.4       | -2.38 | -0.98   | -2.19 | -2.8  | -2.47 |       |       |   |
| GENE195X  | 18566_s_at | 18566_s_at | 1     | -0.03   | -0.45 | -0.92 | 0.11  | -0.76 | -1.3  | - |
|           | 0.55       | -1.4       | -1.09 | -0.32   | -1.47 | -1.73 | -1.46 |       |       |   |
| GENE542X  | 12749_at   | 12749_at   | 1     | -0.19   | -0.45 | -0.6  | 0.07  | -0.44 | -0.53 | - |
|           | 0.26       | -1.36      | -1.06 | -0.05   | -1.79 | -1.89 | -2.06 |       |       |   |
| GENE541X  | 16030_s_at | 16030_s_at | 1     | -0.33   | -0.6  | -0.61 | 0.02  | -0.39 | -0.67 | - |
|           | 0.41       | -1.86      | -1.29 | -0.04   | -1.91 | -2.32 | -3.3  |       |       |   |
| GENE540X  | 15552_at   | 15552_at   | 1     | -0.31   | -0.69 | -0.89 | -0.27 | -0.81 | -1.09 | - |
|           | 0.73       | -2.25      | -1.84 | -0.71   | -2.3  | -3.29 | -3.89 |       |       |   |
| GENE531X  | 18666_s_at | 18666_s_at | 1     | -0.36   | -0.55 | -0.5  | -0.66 | -0.95 | -1.17 | - |
|           | 0.41       | -1.79      | -1.81 | -0.84   | -1.99 | -2.34 | -2.56 |       |       |   |
| GENE530X  | 14545_at   | 14545_at   | 1     | -0.31   | -0.66 | -0.43 | -0.54 | -1    | -0.85 | - |
|           | 0.44       | -2.14      | -1.86 | -0.93   | -2.33 | -2.99 | -2.82 |       |       |   |
| GENE515X  | 17084_s_at | 17084_s_at | 1     | -0.4    | -0.68 | -0.63 | -0.26 | -0.55 | -0.82 | - |
|           | 0.62       | -1.18      | -1.31 | -0.5    | -1.69 | -1.94 | -2.02 |       |       |   |
| GENE514X  | 12075_at   | 12075_at   | 1     | -0.27   | -0.75 | -0.77 | -0.29 | -0.75 | -0.77 | - |
|           | 0.57       | -1.53      | -1.38 | -0.62   | -1.93 | -1.8  | -2.41 |       |       |   |
| GENE518X  | 18977_at   | 18977_at   | 1     | -0.9    | -0.55 | -0.84 | -0.74 | -1.07 | -1.24 | - |
|           | 0.31       | -2         | -0.97 | -0.7    | -2.48 | -3    | -2.91 |       |       |   |
| GENE526X  | 14565_at   | 14565_at   | 1     | -0.08   | -0.17 | -0.26 | -0.19 | -0.22 | -0.5  | - |
|           | 0.39       | -0.69      | -0.56 | -0.16   | -0.78 | -1.09 | -0.9  |       |       |   |

|          |            |            |       |       |       |       |       |       |       |    |
|----------|------------|------------|-------|-------|-------|-------|-------|-------|-------|----|
| GENE525X | 13985_at   | 13985_at   | 1     | -0.24 | -0.22 | -0.24 | -0.13 | -0.33 | -0.76 | -  |
| 0.5      | -0.62      | -0.65      | -0.24 | -0.98 | -1.27 | -1.16 |       |       |       |    |
| GENE524X | 18007_i_at | 18007_i_at | 1     | -0.22 | -0.4  | -0.64 | -0.2  | -0.45 | -1.03 | -  |
| 0.89     | -1.03      | -1         | -0.13 | -1.59 | -1.82 | -1.84 |       |       |       |    |
| GENE523X | 15412_at   | 15412_at   | 1     | -0.13 | -0.23 | -0.31 | -0.06 | -0.46 | -0.75 | -  |
| 0.38     | -0.49      | -0.78      | -0.4  | -1.08 | -1.25 | -1.14 |       |       |       |    |
| GENE522X | 13884_at   | 13884_at   | 1     | -0.34 | -0.4  | -0.13 | -0.16 | -0.5  | -0.97 | -  |
| 0.46     | -1         | -0.87      | -0.41 | -1.62 | -1.74 | -1.84 |       |       |       |    |
| GENE521X | 16977_at   | 16977_at   | 1     | 0.09  | -0.01 | -0.71 | -0.19 | -0.4  | -1.23 | -  |
| 0.47     | -1.07      | -0.93      | -0.4  | -1.89 | -1.72 | -1.8  |       |       |       |    |
| GENE549X | 18540_at   | 18540_at   | 1     | -0.02 | -0.29 | -0.58 | 0.02  | -0.68 | -0.44 | -  |
| 0.34     | -0.73      | -0.79      | -0.34 | -0.88 | -0.88 | -1.11 |       |       |       |    |
| GENE548X | 14907_at   | 14907_at   | 1     | -0.11 | -0.39 | -0.54 | 0.08  | -0.74 | -0.43 | -  |
| 0.23     | -0.88      | -0.92      | -0.11 | -1.04 | -0.84 | -1.4  |       |       |       |    |
| GENE547X | 13441_at   | 13441_at   | 1     | -0.09 | -0.33 | -1.03 | 0.21  | -1.07 | -0.91 | -  |
| 0.12     | -0.94      | -1.28      | -0.23 | -1.27 | -1.46 | -1.52 |       |       |       |    |
| GENE434X | 19375_at   | 19375_at   | 1     | 0.18  | -0.34 | -0.65 | 0.13  | -0.49 | -0.57 | -  |
| 0.03     | -1.24      | -1.51      | -0.32 | -1.4  | -1.59 | -1.43 |       |       |       |    |
| GENE433X | 18247_at   | 18247_at   | 1     | 0.04  | -0.53 | -1.06 | -0.23 | -0.88 | -0.89 | -  |
| 0.18     | -2.09      | -2.66      | -0.93 | -2.25 | -2.44 | -2.32 |       |       |       |    |
| GENE429X | 15634_s_at | 15634_s_at | 1     | -0.04 | -0.66 | -0.79 | -0.25 | -0.89 | -1.05 | -  |
| 0.29     | -1.75      | -1.81      | -0.84 | -1.87 | -1.59 | -1.83 |       |       |       |    |
| GENE428X | 12362_at   | 12362_at   | 1     | -0.32 | -0.64 | -1.58 | 0.07  | -0.77 | -1.71 | -  |
| 0.32     | -2.84      | -2.84      | -1    | -2.84 | -2.36 | -3.4  |       |       |       |    |
| GENE543X | 14859_s_at | 14859_s_at | 1     | -0.36 | -0.78 | -1.58 | -0.46 | -0.57 | -0.19 | -  |
| 0.9      | -2.06      | -2.11      | -0.46 | -2.36 | -1.82 | -2.93 |       |       |       |    |
| GENE225X | 17631_at   | 17631_at   | 1     | -0.44 | -0.21 | -0.58 | 0     | -0.38 | -0.79 | -  |
| 0.71     | -1.67      | -1.32      | -0.32 | -1.67 | -1.24 | -1.82 |       |       |       |    |
| GENE224X | 12176_at   | 12176_at   | 1     | -0.25 | -0.28 | -0.54 | -0.32 | -0.52 | -0.64 | -  |
| 0.72     | -1.23      | -1.23      | -0.51 | -1.52 | -1.13 | -1.87 |       |       |       |    |
| GENE223X | 19215_at   | 19215_at   | 1     | -0.16 | -0.28 | -0.76 | -0.31 | -0.31 | -0.88 | -  |
| 0.72     | -1.57      | -1.17      | -0.71 | -1.88 | -1.76 | -2.3  |       |       |       |    |
| GENE485X | 17063_s_at | 17063_s_at | 1     | -0.29 | -0.19 | -0.86 | -0.17 | -0.56 | -0.86 | -  |
| 0.19     | -0.66      | -1.03      | -0.37 | -0.83 | -1.18 | -1.14 |       |       |       |    |
| GENE484X | 15603_at   | 15603_at   | 1     | -0.26 | -0.23 | -0.73 | -0.41 | -0.57 | -0.84 | -  |
| 0.09     | -0.9       | -0.97      | -0.17 | -1.14 | -1.38 | -1.32 |       |       |       |    |
| GENE483X | 16057_s_at | 16057_s_at | 1     | -0.44 | -0.32 | -0.97 | -0.59 | -0.53 | -0.73 | -  |
| 0.31     | -1.1       | -1.32      | -0.45 | -1.23 | -1.63 | -1.93 |       |       |       |    |
| GENE482X | 14523_at   | 14523_at   | 1     | -0.34 | -0.86 | -1.21 | -0.54 | -0.76 | -0.98 | -  |
| 0.53     | -1.34      | -1.68      | -0.58 | -1.53 | -2.02 | -2.26 |       |       |       |    |
| GENE481X | 12773_at   | 12773_at   | 1     | -0.82 | -0.79 | -1.38 | -0.67 | -0.55 | -1.13 | -  |
| 1.02     | -1.85      | -2.06      | -0.83 | -1.96 | -2.69 | -2.86 |       |       |       |    |
| GENE476X | 16137_s_at | 16137_s_at | 1     | -0.53 | -0.71 | -2.46 | -0.7  | -1.03 | -2.46 | -  |
| 1.16     | -2.07      | -2.71      | -1.55 | -2.93 | -3.9  | -4.01 |       |       |       |    |
| GENE475X | 16017_at   | 16017_at   | 1     | -0.8  | -1.05 | -2.76 | -0.78 | -0.52 | -2.36 | -  |
| 0.9      | -2.67      | -3.51      | -1.14 | -3.25 | -5.15 | -4.28 |       |       |       |    |
| GENE480X | 17003_at   | 17003_at   | 1     | -0.75 | -0.8  | -1.78 | -0.44 | -0.85 | -1.72 | -  |
| 0.48     | -1.95      | -1.84      | -1.01 | -2.2  | -2.61 | -2.93 |       |       |       |    |
| GENE479X | 16477_at   | 16477_at   | 1     | -0.75 | -1.09 | -1.84 | -0.59 | -0.89 | -1.69 | -  |
| 0.81     | -2.52      | -2.23      | -0.95 | -2.69 | -2.73 | -3.09 |       |       |       |    |
| GENE478X | 17931_at   | 17931_at   | 1     | -0.56 | -0.69 | -1.44 | -0.36 | -0.74 | -1.55 | -  |
| 0.91     | -2.16      | -1.85      | -0.6  | -2.39 | -2.84 | -2.62 |       |       |       |    |
| GENE477X | 18890_at   | 18890_at   | 1     | -0.36 | -1.19 | -2.53 | -0.2  | -1.52 | -2.61 | -1 |
| -3.15    | -2.97      | -0.84      | -3.3  | -4.19 | -3.66 |       |       |       |       |    |
| GENE474X | 17823_s_at | 17823_s_at | 1     | -1.14 | -0.94 | -2.82 | -0.76 | -0.8  | -3.23 | -  |
| 1.35     | -3.1       | -2.23      | -1.23 | -3.8  | -4.23 | -5.07 |       |       |       |    |

|           |            |            |       |       |       |       |         |       |       |   |
|-----------|------------|------------|-------|-------|-------|-------|---------|-------|-------|---|
| GENE473X  | 19652_at   | 19652_at   | 1     | -0.22 | -0.19 | -1.96 | -0.01   | -0.67 | -2.21 | - |
|           | 0.79       | -2.67      | -2.33 | -0.16 | -2.83 | -2.83 | -3.67   |       |       |   |
| GENE472X  | 18035_at   | 18035_at   | 1     | -0.4  | -0.8  | -1.8  | -0.4    | -0.74 | -1.63 | - |
|           | 1.25       | -2.09      | -3.07 | -0.08 | -2.94 | -2.8  | -3.96   |       |       |   |
| GENE471X  | 17861_at   | 17861_at   | 1     | -0.51 | -0.89 | -2.34 | -0.01   | -0.7  | -2.13 | - |
|           | 0.94       | -2.37      | -3.02 | -0.65 | -3.33 | -2.63 | -4.61   |       |       |   |
| GENE537X  | 15642_at   | 15642_at   | 1     | -0.45 | -0.33 | -0.79 | -0.58   | -0.25 | -0.54 | - |
|           | 0.57       | -1.23      | -1.93 | -0.52 | -1.74 | -2.75 | -2.67   |       |       |   |
| GENE536X  | 19782_at   | 19782_at   | 1     | -0.49 | -0.66 | -0.92 | -0.45   | -0.29 | -1.07 | - |
|           | 0.67       | -1.7       | -2.32 | -0.92 | -1.91 | -3    | -2.97   |       |       |   |
| GENE489X  | 16612_s_at | 16612_s_at | 1     | -0.29 | -0.12 | -0.61 | -0.49   | -0.39 | -1.01 | - |
|           | 0.43       | -0.99      | -1.12 | -0.25 | -1.23 | -2.11 | -1.87   |       |       |   |
| GENE488X  | 14725_s_at | 14725_s_at | 1     | -0.37 | -0.08 | -0.82 | -0.59   | -0.37 | -1.2  | - |
|           | 0.56       | -1.59      | -1.62 | -0.77 | -1.91 | -2.45 | -2.73   |       |       |   |
| GENE487X  | 20234_s_at | 20234_s_at | 1     | -0.06 | 0.06  | -0.52 | -0.65   | -0.13 | -1    | - |
|           | 0.37       | -1.06      | -1.55 | -0.41 | -1.2  | -1.8  | -2.38   |       |       |   |
| GENE486X  | 13120_at   | 13120_at   | 1     | -0.31 | -0.23 | -0.89 | -0.45   | -0.6  | -1.4  | - |
|           | 0.47       | -1.57      | -2.34 | -0.56 | -2.28 | -3.47 | -4.47   |       |       |   |
| GENE495X  | 19901_at   | 19901_at   | 1     | -0.35 | -0.24 | -0.7  | -0.12   | -0.16 | -0.88 | - |
|           | 0.39       | -0.8       | -1.45 | -0.3  | -0.55 | -1.45 | -1.73   |       |       |   |
| GENE494X  | 13609_at   | 13609_at   | 1     | -0.45 | -0.08 | -0.89 | -0.39   | -0.39 | -0.66 | - |
|           | 0.47       | -0.5       | -1.34 | -0.33 | -0.79 | -1.72 | -2.01   |       |       |   |
| GENE544X  | 12697_at   | 12697_at   | 1     | -0.02 | -0.57 | -0.87 | -0.18   | -0.35 | -0.35 | - |
|           | 0.37       | -0.78      | -1.22 | -0.16 | -1.25 | -1.56 | -1.55   |       |       |   |
| GENE493X  | 16906_at   | 16906_at   | 1     | -0.29 | -0.36 | -1.01 | -0.21   | -0.41 | -0.81 | - |
|           | 0.38       | -1.19      | -1.69 | -0.21 | -1.53 | -2.2  | -2.33   |       |       |   |
| GENE492X  | 18984_at   | 18984_at   | 1     | -0.32 | -0.66 | -1.42 | -0.35   | -0.62 | -1.48 | - |
|           | 0.38       | -1.84      | -2.95 | -0.22 | -2.28 | -3.12 | -4.08   |       |       |   |
| GENE445X  | 19889_at   | 19889_at   | 1     | -0.23 | -0.54 | -0.88 | -0.3    | -0.63 | -1.06 | - |
|           | 0.55       | -1.27      | -2.2  | -0.27 | -1.24 | -1.91 | -1.64   |       |       |   |
| GENE443X  | 16351_at   | 16351_at   | 1     | -0.27 | -0.39 | -1.64 | -0.82   | -1.1  | -2.14 | - |
|           | 0.93       | -2.68      | -3.4  | -0.66 | -3.53 | -3.4  | -3.35   |       |       |   |
| GENE441X  | 12861_s_at | 12861_s_at | 1     | -0.79 | -0.68 | -1.51 | -0.32   | -1.09 | -1.87 | - |
|           | 1.32       | -2.29      | -2.95 | -0.32 | -2.7  | -2.69 | -2.81   |       |       |   |
| GENE442X  | 20389_at   | 20389_at   | 1     | -0.3  | -0.67 | -1.7  | -0.6    | -1.34 | -2.4  | - |
|           | 0.86       | -2.55      | -2.95 | -0.86 | -2.64 | -2.82 | -3.67   |       |       |   |
| GENE538X  | 12496_at   | 12496_at   | 1     | -0.03 | -0.39 | -0.61 | -0.55   | -0.46 | -0.53 | - |
|           | 0.45       | -1.23      | -1.61 | -0.65 | -1.29 | -1.79 | -2.03   |       |       |   |
| GENE491X  | 16125_s_at | 16125_s_at | 1     | -0.21 | -0.38 | -1.23 | -0.71   | -0.63 | -1.09 | - |
|           | 0.36       | -1.51      | -2.22 | -0.83 | -1.62 | -2.27 | -2.47   |       |       |   |
| GENE257X  | 18023_s_at | 18023_s_at | 1     | -0.83 | -0.59 | -1.45 | -0.72   | -0.77 | -1.45 | - |
|           | 1.14       | -1.94      | -3.11 | -1.08 | -2.17 | -2.24 | -3.21   |       |       |   |
| GENE256X  | 20216_s_at | 20216_s_at | 1     | -0.84 | -0.65 | -1.33 | -1.09   | -0.84 | -1.42 | - |
|           | 1.26       | -2.01      | -2.84 | -1.29 | -2.8  | -2.84 | -4      |       |       |   |
| GENE997X  | 15142_at   | 15142_at   | 1     | -0.18 | 0.08  | -0.65 | -0.19   | 0.32  | 0.36  | - |
|           | 0.2        | -1.34      | -0.19 | 0.16  | -0.88 | 0.04  | 0.00716 |       |       |   |
| GENE1055X | 16742_at   | 16742_at   | 1     | -1.78 | -0.84 | -0.95 | 0.02    | -0.64 | -0.14 | - |
|           | 2.04       | -3.6       | 0.13  | -0.25 | -3.6  | 0.17  | -0.53   |       |       |   |
| GENE1057X | 19131_at   | 19131_at   | 1     | -0.51 | -0.42 | -0.07 | -0.36   | -0.31 | 0.25  | - |
|           | 0.6        | -0.86      | -0.1  | -0.75 | -1.13 | -0.4  | -0.12   |       |       |   |
| GENE988X  | 12125_at   | 12125_at   | 1     | -0.3  | -0.38 | 0.3   | -0.14   | -0.65 | 0.1   | - |
|           | 0.42       | -0.87      | 0.06  | -0.46 | -1.02 | -0.17 | -0.22   |       |       |   |
| GENE987X  | 12191_at   | 12191_at   | 1     | -0.34 | -1.08 | 0.19  | -0.45   | -1.08 | 0.68  | - |
|           | 0.52       | -2.5       | -0.16 | -0.48 | -1.91 | -0.05 | -0.63   |       |       |   |
| GENE1088X | 18219_at   | 18219_at   | 1     | -0.11 | -0.02 | 1.26  | -0.18   | -0.45 | 0.25  | - |
|           | 0.44       | -1.47      | 0.12  | -0.74 | -1.82 | -0.58 | -0.8    |       |       |   |

|           |            |            |       |       |       |       |       |       |       |   |
|-----------|------------|------------|-------|-------|-------|-------|-------|-------|-------|---|
| GENE1086X | 19947_at   | 19947_at   | 1     | -0.14 | 0.01  | 0.29  | 0.08  | -0.24 | 0.09  | - |
|           | 0.77       | -1.24      | -0.46 | -0.82 | -3.47 | -1.05 | -1.2  |       |       |   |
| GENE1087X | 17601_at   | 17601_at   | 1     | -0.74 | 0.66  | 0.47  | -1.04 | -0.41 | -0.79 | - |
|           | 0.71       | -1.73      | -0.51 | -1.38 | -3.32 | -1.23 | -1.64 |       |       |   |
| GENE1058X | 17072_s_at | 17072_s_at | 1     | -0.27 | 0.09  | 0.56  | -0.38 | -0.44 | 0     | - |
|           | 0.79       | -0.88      | -0.27 | -0.77 | -1.41 | -0.58 | -0.5  |       |       |   |
| GENE792X  | 16688_at   | 16688_at   | 1     | -0.51 | 0.47  | 0.6   | -0.7  | 0.01  | 0.25  | - |
|           | 0.53       | -1.17      | -0.18 | -1.06 | -1.28 | -0.63 | -0.98 |       |       |   |
| GENE1105X | 16039_s_at | 16039_s_at | 1     | -0.41 | -0.08 | 0.52  | -0.02 | -0.1  | -0.34 | - |
|           | 0.52       | -1.63      | -0.06 | -0.39 | -2.15 | -1.13 | -2.23 |       |       |   |
| GENE783X  | 16990_at   | 16990_at   | 1     | -0.72 | 0.3   | 0.84  | -0.64 | -0.72 | 0     | - |
|           | 0.2        | -3.1       | 0     | -1.48 | -3.1  | 0     | -3.29 |       |       |   |
| GENE976X  | 17936_s_at | 17936_s_at | 1     | -0.56 | -0.96 | -0.34 | -0.38 | -0.69 | -0.22 | - |
|           | 0.94       | -2.21      | -0.83 | -0.56 | -1.86 | -0.42 | -2.06 |       |       |   |
| GENE975X  | 18670_g_at | 18670_g_at | 1     | -0.43 | -0.75 | -0.47 | -0.58 | -0.49 | -0.38 | - |
|           | 0.73       | -2.07      | -0.55 | -0.73 | -1.88 | -0.53 | -1.9  |       |       |   |
| GENE974X  | 12561_at   | 12561_at   | 1     | -0.35 | -0.99 | -0.79 | -0.19 | -0.83 | -0.91 | - |
|           | 0.9        | -2.72      | -1.23 | -0.72 | -2.77 | -0.95 | -2.33 |       |       |   |
| GENE784X  | 18669_at   | 18669_at   | 1     | -0.08 | -0.28 | -0.14 | -0.05 | -0.15 | -0.09 | - |
|           | 0.19       | -1.24      | -0.13 | -0.12 | -1.02 | -0.02 | -1.24 |       |       |   |
| GENE1364X | 12145_at   | 12145_at   | 1     | -0.06 | -1.34 | -0.28 | 0.21  | -0.37 | 0.06  | - |
|           | 0.45       | -0.68      | 0.11  | 0.56  | -0.52 | -0.17 | -0.76 |       |       |   |
| GENE1363X | 19977_at   | 19977_at   | 1     | -0.74 | -1.9  | -0.1  | 0.73  | -0.93 | -0.79 | - |
|           | 0.2        | -1.62      | -0.53 | 0.54  | -0.75 | -1.32 | -0.61 |       |       |   |
| GENE1362X | 14676_i_at | 14676_i_at | 1     | 0.07  | -0.83 | -0.45 | 0.91  | -1.32 | -0.3  | - |
|           | 0.16       | -0.55      | -1    | 1.04  | -0.94 | -0.53 | -1.07 |       |       |   |
| GENE1385X | 15933_at   | 15933_at   | 1     | -0.34 | -0.42 | -0.22 | 0.13  | -0.28 | -0.22 | - |
|           | 0.34       | -1.13      | 0.11  | 0.7   | -0.73 | -0.22 | 0.07  |       |       |   |
| GENE1384X | 16001_at   | 16001_at   | 1     | -0.72 | -1.37 | -0.21 | 0.58  | -0.76 | -0.74 | - |
|           | 0.39       | -2.21      | 0.03  | 0.88  | -0.98 | -0.04 | 0.12  |       |       |   |
| GENE989X  | 13314_at   | 13314_at   | 1     | 0.07  | -1.19 | -0.13 | 0.32  | -1.14 | -0.2  | - |
|           | 0.03       | -2.19      | -0.52 | 0.38  | -2.73 | -0.76 | -0.38 |       |       |   |
| GENE982X  | 19406_at   | 19406_at   | 1     | -0.37 | -0.44 | 0.48  | 0.17  | -0.93 | -0.29 | - |
|           | 0.56       | -1.82      | -0.1  | -0.29 | -1.55 | -0.69 | -0.18 |       |       |   |
| GENE992X  | 13571_at   | 13571_at   | 1     | 0.25  | -0.41 | -0.28 | -0.14 | -0.29 | -0.07 | - |
|           | 0.49       | -0.29      | -0.13 | 0.31  | -1.04 | -0.07 | -0.08 |       |       |   |
| GENE991X  | 14028_at   | 14028_at   | 1     | -0.3  | -0.96 | -0.95 | -0.49 | -0.69 | 0.49  | - |
|           | 0.1        | -1.62      | -0.48 | 0.1   | -1.89 | -0.37 | -0.47 |       |       |   |
| GENE990X  | 12268_at   | 12268_at   | 1     | -0.04 | -1.94 | -0.64 | -0.8  | -0.69 | -0.3  | - |
|           | 0.12       | -1         | -0.6  | 0.09  | -1.94 | -0.96 | -0.19 |       |       |   |
| GENE1352X | 15845_at   | 15845_at   | 1     | 0.32  | -0.85 | -0.48 | 0.56  | -0.42 | -0.15 | - |
|           | 0.06       | -0.92      | -1.02 | -0.13 | -0.96 | -0.7  | -1.12 |       |       |   |
| GENE1230X | 17996_at   | 17996_at   | 1     | 0.54  | -0.35 | -0.76 | 0.21  | -0.28 | -0.53 | - |
|           | 0.54       | -1.18      | -1.29 | 0.11  | -1.27 | -0.97 | -0.81 |       |       |   |
| GENE1229X | 18678_at   | 18678_at   | 1     | 0.4   | -0.59 | -0.55 | 0.29  | -0.62 | -0.65 | - |
|           | 0.27       | -1.11      | -1.2  | 0.06  | -1.45 | -1.57 | -1.33 |       |       |   |
| GENE1228X | 14726_s_at | 14726_s_at | 1     | 0.3   | -0.36 | -0.92 | 0.29  | -0.46 | -0.83 | - |
|           | 0.14       | -1.68      | -1.28 | 0.3   | -1.88 | -1.88 | -1.45 |       |       |   |
| GENE1227X | 18564_at   | 18564_at   | 1     | 0.01  | -0.36 | -1.02 | 0.49  | -0.46 | -0.74 | - |
|           | 0.01       | -1.36      | -1.42 | 0.14  | -1.63 | -1.31 | -1.68 |       |       |   |
| GENE1226X | 16554_s_at | 16554_s_at | 1     | 0.09  | -0.41 | -1.24 | 0.25  | -0.95 | -1.16 | - |
|           | 0.4        | -1.19      | -1.46 | 0.28  | -1.83 | -1.51 | -1.71 |       |       |   |
| GENE1236X | 12029_at   | 12029_at   | 1     | 0.36  | -0.46 | -0.7  | 0.39  | -0.66 | -0.32 | - |
|           | 0.18       | -0.77      | -0.97 | 0.03  | -0.89 | -1.06 | -0.43 |       |       |   |
| GENE1235X | 19371_at   | 19371_at   | 1     | 0.64  | -0.8  | -1.37 | 0.3   | -1.13 | -0.6  | - |
|           | 0.22       | -0.83      | -1.12 | 0.51  | -1.44 | -1.22 | -0.93 |       |       |   |

|           |            |            |       |         |       |       |       |       |       |
|-----------|------------|------------|-------|---------|-------|-------|-------|-------|-------|
| GENE1234X | 12195_at   | 12195_at   | 1     | 0.24    | -0.85 | -1.03 | 0.56  | -0.94 | -0.86 |
| 0.01      | -1.37      | -1.09      | 0.14  | -1.14   | -0.99 | -0.96 |       |       |       |
| GENE1233X | 20612_s_at | 20612_s_at | 1     | 0.67    | -0.87 | -1.37 | 0.73  | -0.73 | -0.89 |
| 0.31      | -1.45      | -1.5       | 0.21  | -1.21   | -1.18 | -0.81 |       |       |       |
| GENE1232X | 13027_at   | 13027_at   | 1     | 0       | -1.21 | -1.58 | 0.28  | -0.41 | -0.81 |
| 0.12      | -1.45      | -1.1       | 0.06  | -1.37   | -1.65 | -1.24 |       |       |       |
| GENE1231X | 18664_at   | 18664_at   | 1     | -0.25   | -2.89 | -3.01 | 0.9   | -1.85 | -2.75 |
| 0.11      | -2.64      | -2.6       | 0.47  | -2.46   | -2.66 | -1.79 |       |       |       |
| GENE1241X | 15608_at   | 15608_at   | 1     | 0.42    | 0.1   | -0.59 | 0.24  | -0.53 | -0.97 |
| 0.19      | -0.63      | -1.08      | 0.17  | -0.79   | -1.36 | -1.02 |       |       |       |
| GENE1240X | 19984_at   | 19984_at   | 1     | 0.25    | -0.19 | -0.73 | 0.54  | -0.72 | -1.18 |
| 0.11      | -0.54      | -1.23      | 0.28  | -1.04   | -1.08 | -0.85 |       |       |       |
| GENE1239X | 13485_at   | 13485_at   | 1     | 0.11    | -0.35 | -0.3  | 0.11  | -0.49 | -1.23 |
| 0.09      | -0.52      | -0.82      | 0.21  | -0.64   | -0.95 | -0.55 |       |       |       |
| GENE1238X | 20649_at   | 20649_at   | 1     | 0.28    | -0.27 | -0.71 | 0.16  | -0.77 | -1.83 |
| 0.13      | -0.31      | -1.24      | -0.22 | -1.18   | -1.75 | -0.75 |       |       |       |
| GENE1237X | 18033_r_at | 18033_r_at | 1     | 0.05    | -0.21 | -0.24 | -0.12 | -0.61 | -0.79 |
| 0.42      | -0.47      | -0.41      | 0.34  | -1.06   | -0.77 | -0.51 |       |       |       |
| GENE1318X | 15102_s_at | 15102_s_at | 1     | 0.13    | -0.24 | -0.37 | 0.24  | -0.52 | -0.74 |
| 0.07      | -0.86      | -1.49      | -0.05 | -1.26   | -2.53 | -1.18 |       |       |       |
| GENE1317X | 15659_at   | 15659_at   | 1     | 0.17    | -0.13 | -0.13 | 0.33  | -0.38 | -0.35 |
| 0.17      | -0.78      | -0.94      | 0.03  | -0.96   | -1.61 | -0.76 |       |       |       |
| GENE1316X | 16004_s_at | 16004_s_at | 1     | 0.2     | -0.28 | -0.11 | 0.31  | -0.39 | -0.78 |
| 0.08      | -1.12      | -1.17      | -0.05 | -1.38   | -2.31 | -1.25 |       |       |       |
| GENE1315X | 13213_s_at | 13213_s_at | 1     | 0.16    | -0.15 | 0.01  | 0.27  | -0.5  | -0.65 |
| 0.11      | -1.02      | -1.03      | -0.12 | -1.41   | -2.28 | -1.12 |       |       |       |
| GENE1314X | 15170_s_at | 15170_s_at | 1     | 0.17    | 0.03  | 0.2   | 0.3   | -0.32 | -1.13 |
| 0.05      | -1.33      | -1.98      | -0.14 | -1.74   | -2.96 | -1.45 |       |       |       |
| GENE1313X | 12610_at   | 12610_at   | 1     | 0.64    | -0.19 | 0.06  | 0.49  | -0.08 | -1.26 |
| 0.16      | -1.71      | -2.09      | -0.33 | -2.12   | -3.52 | -2.23 |       |       |       |
| GENE1312X | 16424_g_at | 16424_g_at | 1     | 0.17    | -0.37 | -0.29 | 0.08  | -0.35 | -0.31 |
| 0.03      | -1.06      | -1.03      | 0.06  | -1.11   | -1.7  | -0.95 |       |       |       |
| GENE1311X | 18082_at   | 18082_at   | 1     | 0.06    | -0.43 | -0.38 | 0.24  | -0.5  | -0.29 |
| 0.08      | -1.04      | -1.25      | -0.17 | -1.19   | -2.14 | -1.44 |       |       |       |
| GENE1310X | 18732_i_at | 18732_i_at | 1     | 0.06    | -0.13 | -0.54 | 0.04  | -0.42 | -0.43 |
| 0.07      | -1.11      | -1.47      | -0.16 | -1.19   | -1.91 | -1.2  |       |       |       |
| GENE1305X | 15995_at   | 15995_at   | 1     | 0.06    | -0.24 | -0.18 | 0.16  | -0.36 | -0.45 |
| 0.05      | -0.98      | -1.12      | -0.16 | -1.18   | -1.67 | -1.11 |       |       |       |
| GENE1304X | 16024_at   | 16024_at   | 1     | 0.01    | -0.21 | -0.42 | 0.11  | -0.26 | -0.4  |
| 0.2       | -1.25      | -1.38      | -0.27 | -1.45   | -2.13 | -1.26 |       |       |       |
| GENE1309X | 13234_s_at | 13234_s_at | 1     | 0.04    | -0.28 | -0.37 | 0.02  | -0.41 | -0.62 |
| 0.21      | -1.03      | -1.31      | -0.2  | -1.19   | -2.04 | -1.34 |       |       |       |
| GENE1308X | 16449_s_at | 16449_s_at | 1     | -0.0061 | -0.4  | -0.43 | -0.05 | -0.53 | -     |
| 0.64      | -0.22      | -1.42      | -1.58 | -0.32   | -1.59 | -2.24 | -1.64 |       |       |
| GENE1307X | 18073_g_at | 18073_g_at | 1     | 0.1     | -0.42 | -0.49 | -0.06 | -0.52 | -0.5  |
| 0.00621   | -1.07      | -1.4       | -0.1  | -1.19   | -1.85 | -1.39 |       |       |       |
| GENE1306X | 16455_at   | 16455_at   | 1     | 0.13    | -0.44 | -0.67 | 0.17  | -0.71 | -0.9  |
| 0.04      | -1.47      | -1.68      | -0.16 | -1.72   | -2.53 | -1.87 |       |       |       |
| GENE1125X | 17087_at   | 17087_at   | 1     | -0.12   | -0.5  | -0.83 | 0.01  | -0.79 | -1.06 |
| 0.24      | -1.59      | -1.95      | -0.31 | -1.83   | -2.74 | -1.86 |       |       |       |
| GENE431X  | 15117_at   | 15117_at   | 1     | 0.12    | -0.55 | -0.93 | -0.14 | -0.74 | -1    |
| 0.19      | -1.67      | -1.9       | -0.44 | -2.09   | -2.81 | -2.11 |       |       |       |
| GENE1187X | 16414_at   | 16414_at   | 1     | 0.11    | -0.41 | -0.52 | 0.01  | -0.33 | -0.71 |
| 0.18      | -1.24      | -1.79      | -0.22 | -1.46   | -2.26 | -0.68 |       |       |       |
| GENE1303X | 15097_at   | 15097_at   | 1     | -0.07   | -0.52 | -0.62 | 0.1   | -0.78 | -1.28 |
| 0.33      | -1.97      | -2.08      | -0.4  | -2.38   | -3.17 | -1.76 |       |       |       |

|           |            |            |       |       |       |       |        |       |       |   |
|-----------|------------|------------|-------|-------|-------|-------|--------|-------|-------|---|
| GENE1302X | 16015_at   | 16015_at   | 1     | 0.04  | -0.26 | -0.17 | 0.0049 |       | -0.58 | - |
|           | 0.96       | -0.4       | -1.96 | -1.91 | -0.51 | -2.47 | -3.11  | -1.69 |       |   |
| GENE446X  | 12218_at   | 12218_at   | 1     | -0.24 | -0.71 | -0.51 | -0.13  | -0.69 | -0.99 | - |
|           | 0.85       | -2.4       | -2.19 | -1.01 | -2.95 | -3.71 | -1.71  |       |       |   |
| GENE1258X | 16068_s_at | 16068_s_at | 1     | -0.01 | -0.33 | -0.04 | 0      | -0.4  | -0.97 | - |
|           | 0.11       | -0.78      | -0.95 | -0.26 | -1.61 | -1.8  | -0.41  |       |       |   |
| GENE1257X | 14729_s_at | 14729_s_at | 1     | -0.08 | -0.32 | -0.27 | -0.46  | -0.55 | -1.21 | - |
|           | 0.35       | -1.4       | -1.12 | -0.49 | -1.93 | -2.22 | -0.67  |       |       |   |
| GENE1256X | 14728_s_at | 14728_s_at | 1     | 0.1   | 0.02  | -0.54 | -0.17  | -0.64 | -1.44 | - |
|           | 0.14       | -1.07      | -1.49 | -0.24 | -1.91 | -2.37 | -1.47  |       |       |   |
| GENE1255X | 16468_at   | 16468_at   | 1     | -0.4  | -0.1  | -1.43 | -0.32  | -0.78 | -2.67 | - |
|           | 0.78       | -2.73      | -2.91 | -0.6  | -4.02 | -5.39 | -2.17  |       |       |   |
| GENE1225X | 18655_at   | 18655_at   | 1     | 0.3   | -0.23 | -0.21 | -0.1   | -0.38 | -0.71 |   |
|           | 0.02       | -0.95      | -0.63 | 0     | -1.04 | -1.15 | -0.49  |       |       |   |
| GENE196X  | 18565_i_at | 18565_i_at | 1     | 0.1   | -0.39 | -0.27 | 0.01   | -0.4  | -0.89 | - |
|           | 0.32       | -1.01      | -0.69 | -0.14 | -1.23 | -1.42 | -0.91  |       |       |   |
| GENE1194X | 20018_at   | 20018_at   | 1     | -0.32 | -0.67 | -1.02 | 0      | -0.15 | -0.58 |   |
|           | 0.07       | -0.75      | -1.28 | 0     | -0.63 | -1.58 | -0.93  |       |       |   |
| GENE1193X | 12515_at   | 12515_at   | 1     | -0.03 | -0.82 | -1.31 | 0.17   | -0.03 | -0.29 | - |
|           | 0.17       | -0.88      | -2.07 | -0.4  | -1.25 | -2.49 | -1.69  |       |       |   |
| GENE1192X | 15658_at   | 15658_at   | 1     | -0.11 | -0.05 | -1.01 | -0.03  | -0.18 | -0.6  | - |
|           | 0.07       | -0.79      | -1.64 | -0.63 | -1.01 | -1.61 | -0.94  |       |       |   |
| GENE1191X | 13551_at   | 13551_at   | 1     | -0.15 | -0.33 | -1.06 | 0.06   | -0.02 | -0.46 | - |
|           | 0.3        | -1.11      | -1.49 | -0.26 | -1.13 | -1.55 | -0.95  |       |       |   |
| GENE1145X | 15385_at   | 15385_at   | 1     | -0.09 | -0.37 | -1.2  | 0.07   | -0.18 | -1.08 | - |
|           | 0.05       | -0.4       | -1.48 | -0.44 | -1.47 | -1.93 | -1.48  |       |       |   |
| GENE1144X | 13587_at   | 13587_at   | 1     | -0.56 | -0.16 | -3.45 | -0.42  | -0.38 | -2.8  | - |
|           | 0.56       | -1.66      | -3.94 | -1.05 | -2.92 | -3.45 | -3.54  |       |       |   |
| GENE1143X | 12223_s_at | 12223_s_at | 1     | 0.07  | -0.16 | -1.57 | -0.06  | -0.09 | -1.68 | - |
|           | 0.00738    | -1.5       | -2.44 | 0.16  | -1.71 | -2.91 | -1.21  |       |       |   |
| GENE1142X | 18911_at   | 18911_at   | 1     | -0.41 | -0.14 | -2.47 | -0.29  | -0.13 | -1.79 | - |
|           | 0.08       | -1.26      | -2.86 | -0.1  | -2.03 | -3.91 | -2.08  |       |       |   |
| GENE1141X | 13143_at   | 13143_at   | 1     | -0.04 | -0.45 | -1.1  | -0.41  | -0.04 | -0.86 | - |
|           | 0.09       | -1.04      | -1.46 | 0     | -0.99 | -1.78 | -0.95  |       |       |   |
| GENE1140X | 17937_at   | 17937_at   | 1     | -0.47 | -0.46 | -1.32 | -0.18  | -0.29 | -0.96 | - |
|           | 0.14       | -1.06      | -1.59 | -0.24 | -1.31 | -1.88 | -1.29  |       |       |   |
| GENE1139X | 19467_at   | 19467_at   | 1     | -0.69 | -0.91 | -3.97 | -0.67  | -0.41 | -3.03 | - |
|           | 0.97       | -2.5       | -3.97 | -0.46 | -3.08 | -4.97 | -2.5   |       |       |   |
| GENE1138X | 18265_at   | 18265_at   | 1     | -0.78 | -0.97 | -3.54 | -0.73  | -0.7  | -2.83 | - |
|           | 0.95       | -3.51      | -4.19 | -0.76 | -3.24 | -4.67 | -2.37  |       |       |   |
| GENE1137X | 12860_s_at | 12860_s_at | 1     | -0.14 | -0.39 | -1.07 | -0.2   | -0.73 | -1.45 | - |
|           | 0.44       | -0.95      | -1.71 | 0.02  | -1.53 | -2.45 | -1.19  |       |       |   |
| GENE1136X | 17997_s_at | 17997_s_at | 1     | -0.1  | -0.19 | -1.07 | -0.14  | -0.27 | -0.96 | - |
|           | 0.13       | -0.93      | -1.48 | -0.28 | -1.3  | -2.05 | -1.36  |       |       |   |
| GENE1135X | 15054_at   | 15054_at   | 1     | -0.02 | -0.51 | -1.58 | -0.35  | -0.64 | -1.39 | - |
|           | 0.62       | -1.85      | -2.51 | -0.62 | -2.23 | -3.17 | -1.86  |       |       |   |
| GENE1134X | 19898_at   | 19898_at   | 1     | -0.54 | -0.74 | -1.71 | -0.09  | -0.72 | -2.06 | - |
|           | 0.9        | -2         | -2.34 | -0.47 | -2.23 | -3.44 | -2.08  |       |       |   |
| GENE1133X | 14634_s_at | 14634_s_at | 1     | -0.64 | -0.39 | -2.25 | -0.24  | -0.52 | -2.55 | - |
|           | 1.18       | -2.41      | -2.96 | -0.76 | -3.03 | -4.59 | -2.54  |       |       |   |
| GENE1221X | 12791_r_at | 12791_r_at | 1     | 0.33  | -0.43 | -1.6  | 0.33   | -0.56 | -1.36 |   |
|           | 0.22       | -1.65      | -1.57 | 0.25  | -1.75 | -2.06 | -0.41  |       |       |   |
| GENE1220X | 12792_s_at | 12792_s_at | 1     | 0.4   | -0.24 | -2.29 | 0.5    | -0.45 | -1.99 |   |
|           | 0.32       | -2.04      | -2.17 | 0.24  | -2.01 | -2.73 | -1.21  |       |       |   |
| GENE1219X | 15219_at   | 15219_at   | 1     | 0.45  | 0.15  | -1.83 | 0.79   | -0.43 | -2.19 | - |
|           | 0.26       | -2.43      | -2.67 | 0.22  | -2.43 | -3    | -1.45  |       |       |   |



|           |            |            |       |       |       |       |       |       |       |   |
|-----------|------------|------------|-------|-------|-------|-------|-------|-------|-------|---|
| GENE1186X | 13001_at   | 13001_at   | 1     | 0.13  | -0.48 | -1.14 | -0.18 | -0.37 | -1.33 | - |
|           | 0.39       | -1.26      | -1.61 | 0.08  | -1.48 | -2.03 | -0.68 |       |       |   |
| GENE1185X | 17957_at   | 17957_at   | 1     | 0.08  | -0.77 | -2.36 | -0.21 | -0.89 | -2.83 | - |
|           | 0.8        | -3.25      | -3.88 | -0.65 | -3.34 | -4.42 | -1.31 |       |       |   |
| GENE1223X | 15079_at   | 15079_at   | 1     | 0.07  | -0.8  | -0.8  | -0.23 | -0.59 | -0.82 |   |
|           | 0.11       | -1.28      | -1.51 | -0.29 | -1.57 | -1.84 | -1.04 |       |       |   |
| GENE1222X | 18075_r_at | 18075_r_at | 1     | 0.09  | -0.59 | -0.62 | -0.19 | -0.84 | -0.82 | - |
|           | 0.06       | -1.24      | -1.37 | -0.03 | -1.63 | -1.71 | -0.87 |       |       |   |
| GENE1130X | 19224_at   | 19224_at   | 1     | -0.09 | -0.37 | -0.84 | 0.05  | -0.6  | -0.87 | - |
|           | 0.16       | -0.9       | -1.2  | -0.06 | -1.26 | -1.43 | -0.93 |       |       |   |
| GENE1129X | 15144_s_at | 15144_s_at | 1     | -0.13 | -0.94 | -1.48 | -0.37 | -1.24 | -2.13 | - |
|           | 0.16       | -2.71      | -2.54 | -0.44 | -2.91 | -3.64 | -2.32 |       |       |   |
| GENE1128X | 17054_s_at | 17054_s_at | 1     | 0.42  | -0.8  | -1.72 | 0.12  | -0.95 | -1.6  | - |
|           | 0.21       | -1.99      | -2.44 | -0.1  | -2.04 | -3.63 | -1.79 |       |       |   |
| GENE910X  | 16362_at   | 16362_at   | 1     | -0.04 | -0.9  | -1.8  | -0.24 | -0.04 | -1.1  | - |
|           | 0.29       | -2.58      | -2    | -0.41 | -2.58 | -2.48 | -1.7  |       |       |   |
| GENE909X  | 12028_at   | 12028_at   | 1     | 0.44  | -0.71 | -2.04 | 0.12  | -0.74 | -1.32 | - |
|           | 0.1        | -2.71      | -2.67 | -0.06 | -3.98 | -2.54 | -2.46 |       |       |   |
| GENE1178X | 14011_at   | 14011_at   | 1     | 0.09  | -0.77 | -1.24 | 0.13  | -0.46 | -1.59 | - |
|           | 0.2        | -1.77      | -1.69 | -0.09 | -1.63 | -1.44 | -1.16 |       |       |   |
| GENE438X  | 18046_s_at | 18046_s_at | 1     | 0.06  | -1.03 | -1.26 | 0.01  | -1.11 | -1.29 | - |
|           | 0.23       | -2.01      | -2.07 | -0.49 | -2.23 | -2.17 | -2    |       |       |   |
| GENE435X  | 20117_at   | 20117_at   | 1     | 0.15  | -1.12 | -2.13 | -0.08 | -1.01 | -1.38 | - |
|           | 0.21       | -2.28      | -2.41 | -0.72 | -2.37 | -2.26 | -2.02 |       |       |   |
| GENE436X  | 12034_at   | 12034_at   | 1     | 0.15  | -0.94 | -1.46 | 0.21  | -0.62 | -1.38 | - |
|           | 0.28       | -1.98      | -2.5  | -0.21 | -1.73 | -2.45 | -2.12 |       |       |   |
| GENE1151X | 18576_s_at | 18576_s_at | 1     | -0.18 | -0.42 | -0.89 | -0.09 | -0.44 | -1.33 |   |
|           | 0.12       | -0.39      | -0.89 | -0.02 | -0.91 | -1.84 | -1.73 |       |       |   |
| GENE1149X | 17999_at   | 17999_at   | 1     | 0.05  | -0.22 | -2.41 | 0.06  | -0.59 | -4.84 | - |
|           | 0.41       | -1.04      | -3.84 | -0.53 | -1.95 | -4.84 | -2.96 |       |       |   |
| GENE1150X | 14894_at   | 14894_at   | 1     | 0     | -0.39 | -0.66 | -0.58 | -0.2  | -1.19 | 0 |
|           | -0.46      | -0.95      | -0.09 | -0.7  | -1.19 | -0.9  |       |       |       |   |
| GENE203X  | 13293_s_at | 13293_s_at | 1     | -0.07 | -0.03 | -1.34 | -0.72 | -1.48 | -2.57 | - |
|           | 0.22       | -1         | -1.81 | -0.38 | -1.43 | -2.81 | -1.69 |       |       |   |
| GENE1259X | 18034_s_at | 18034_s_at | 1     | -0.23 | -0.15 | -0.21 | -0.31 | -0.39 | -0.78 |   |
|           | 0.24       | -0.54      | -0.73 | 0.03  | -1.19 | -1.32 | -1    |       |       |   |
| GENE1122X | 14622_at   | 14622_at   | 1     | -0.05 | -0.04 | -0.63 | -0.32 | -0.42 | -0.98 | - |
|           | 0.11       | -0.84      | -0.97 | 0.13  | -1.22 | -1.13 | -1.02 |       |       |   |
| GENE1121X | 14029_at   | 14029_at   | 1     | -0.41 | -0.03 | -1.43 | -0.79 | -0.94 | -3.38 | - |
|           | 0.67       | -3         | -3.19 | -1    | -3.26 | -3.86 | -3.67 |       |       |   |
| GENE729X  | 13518_at   | 13518_at   | 1     | -0.2  | 0.05  | 0.06  | -0.2  | 0     | -1.45 | - |
|           | 0.23       | -0.89      | -1.23 | -0.08 | -1.11 | -1.5  | -0.83 |       |       |   |
| GENE728X  | 20454_at   | 20454_at   | 1     | -0.27 | 0.13  | -0.19 | -0.18 | -0.16 | -0.72 | - |
|           | 0.47       | -0.31      | -0.77 | 0     | -0.64 | -1.09 | -1.02 |       |       |   |
| GENE726X  | 20210_g_at | 20210_g_at | 1     | -0.08 | 0.54  | -0.41 | -0.05 | 0.07  | -1.72 | - |
|           | 0.36       | -0.4       | -1.18 | -0.3  | -1.68 | -2.24 | -1.86 |       |       |   |
| GENE1268X | 19431_s_at | 19431_s_at | 1     | -0.11 | -0.01 | -1.61 | -0.09 | -0.09 | -1.89 | - |
|           | 0.3        | -1.4       | -3    | -0.17 | -2.11 | -3.89 | -3.42 |       |       |   |
| GENE1148X | 12452_at   | 12452_at   | 1     | 0     | -0.19 | -0.9  | -0.22 | -0.28 | -1.24 | - |
|           | 0.43       | -0.75      | -1.6  | -0.26 | -1.17 | -2    | -1.76 |       |       |   |
| GENE1147X | 17000_at   | 17000_at   | 1     | -0.07 | -0.44 | -1.35 | -0.26 | -0.02 | -1.6  | - |
|           | 0.39       | -1.5       | -2.33 | -0.47 | -1.46 | -2.97 | -2.1  |       |       |   |
| GENE727X  | 14623_g_at | 14623_g_at | 1     | -0.21 | 0.19  | -0.84 | -0.49 | -0.09 | -1.48 | - |
|           | 0.33       | -0.71      | -1.48 | -0.18 | -1.18 | -1.76 | -1.42 |       |       |   |
| GENE507X  | 13563_at   | 13563_at   | 1     | -0.11 | -0.04 | -0.25 | -0.18 | -0.03 | -0.63 | 0 |
|           | -0.46      | -0.91      | -0.25 | -0.86 | -1.55 | -1    |       |       |       |   |

|           |            |            |          |       |       |       |       |       |       |   |
|-----------|------------|------------|----------|-------|-------|-------|-------|-------|-------|---|
| GENE506X  | 16673_at   | 16673_at   | 1        | -0.32 | -0.27 | -0.65 | -0.44 | -0.19 | -1.49 | - |
| 0.52      | -1.09      | -2.12      | -0.57    | -1.34 | -3.53 | -2.41 |       |       |       |   |
| GENE505X  | 12178_s_at | 12178_s_at | 1        | -0.09 | 0.2   | -0.42 | -0.41 | 0.08  | -0.99 | - |
| 0.51      | -0.78      | -1.4       | -0.55    | -1.11 | -1.82 | -1.63 |       |       |       |   |
| GENE504X  | 15602_f_at | 15602_f_at | 1        | -0.69 | 0.42  | -0.63 | -0.76 | -0.37 | -1.63 | - |
| 0.54      | -1.28      | -2.23      | -0.63    | -1.77 | -3.02 | -2.29 |       |       |       |   |
| GENE501X  | 19902_at   | 19902_at   | 1        | -0.18 | 0.14  | -0.73 | -0.36 | -0.38 | -1.13 | - |
| 0.59      | -1.12      | -1.82      | -0.59    | -1.46 | -2.1  | -1.57 |       |       |       |   |
| GENE500X  | 14454_at   | 14454_at   | 1        | -0.21 | 0.03  | -0.9  | -0.33 | -0.18 | -1.05 | - |
| 0.42      | -1.2       | -1.58      | -0.96    | -1.6  | -2.18 | -1.68 |       |       |       |   |
| GENE490X  | 20449_at   | 20449_at   | 1        | -0.29 | -0.24 | -1.61 | -0.71 | -0.21 | -1.95 | - |
| 0.62      | -1.85      | -3.53      | -1.17    | -2.39 | -3.53 | -3.56 |       |       |       |   |
| GENE1245X | 12477_at   | 12477_at   | 1        | 0     | -0.41 | -0.7  | 0.01  | -1    | -1.62 | - |
| 0.39      | -0.61      | -1.12      | -0.34    | -0.44 | -0.91 | -0.91 |       |       |       |   |
| GENE1244X | 15215_s_at | 15215_s_at | 1        | -0.08 | -0.43 | -1.17 | -0.21 | -0.42 | -1.73 | - |
| 0.13      | -0.47      | -0.87      | -0.22    | -0.65 | -1.08 | -1.49 |       |       |       |   |
| GENE1242X | 16052_at   | 16052_at   | 1        | -0.75 | -0.78 | -1.86 | -1.15 | -1.28 | -2.86 | - |
| 0.14      | -1.53      | -1.36      | -0.94    | -1.31 | -1.57 | -3.2  |       |       |       |   |
| GENE1243X | 14951_at   | 14951_at   | 1        | 0.23  | -0.45 | -1.53 | -0.08 | -0.87 | -1.46 | - |
| 0.55      | -1.29      | -1.05      | -0.47    | -1.06 | -0.81 | -2.19 |       |       |       |   |
| GENE1212X | 14072_at   | 14072_at   | 1        | -0.07 | -0.9  | -1.33 | -0.26 | -0.96 | -1.12 | - |
| 0.45      | -1.29      | -1.57      | -0.0094  | -1.03 | -1.74 | -1.09 |       |       |       |   |
| GENE1211X | 20330_at   | 20330_at   | 1        | -0.67 | -1.32 | -3.17 | -0.14 | -1.9  | -2.8  | - |
| 0.67      | -2.58      | -3.65      | -0.35    | -2.1  | -3.65 | -2.63 |       |       |       |   |
| GENE1179X | 18616_at   | 18616_at   | 1        | 0.1   | -0.69 | -0.97 | 0.17  | -0.6  | -0.93 | - |
| 0.37      | -0.99      | -1.2       | 0        | -0.74 | -1.03 | -0.61 |       |       |       |   |
| GENE1181X | 17525_at   | 17525_at   | 1        | -0.19 | -2.13 | -3.58 | -0.41 | -1.65 | -2.9  | - |
| 0.33      | -1.65      | -3.58      | -0.58    | -2.13 | -2.58 | -1.37 |       |       |       |   |
| GENE1183X | 13553_at   | 13553_at   | 1        | -0.38 | -0.9  | -1.5  | -0.29 | -0.51 | -0.88 | - |
| 0.6       | -1.42      | -1.77      | -0.51    | -1.01 | -1.29 | -0.75 |       |       |       |   |
| GENE1182X | 20317_at   | 20317_at   | 1        | -0.29 | -1.03 | -2.3  | -0.14 | -1.03 | -1.89 | - |
| 0.47      | -2.39      | -2.7       | -0.75    | -1.48 | -2.79 | -0.98 |       |       |       |   |
| GENE1213X | 16014_at   | 16014_at   | 1        | -0.24 | -1    | -1.73 | 0.01  | -0.72 | -1.69 | - |
| 0.49      | -1.73      | -1.79      | -0.09    | -0.89 | -2.12 | -2.05 |       |       |       |   |
| GENE1117X | 15111_s_at | 15111_s_at | 1        | -0.37 | -0.9  | -2.96 | -0.19 | -1.15 | -3.06 | - |
| 0.44      | -2.74      | -3.33      | -0.12    | -2.46 | -3.77 | -3.65 |       |       |       |   |
| GENE1116X | 13628_at   | 13628_at   | 1        | -0.37 | -0.97 | -2.97 | -0.57 | -1.44 | -3.55 | - |
| 0.67      | -3.66      | -3.97      | -0.75    | -3.02 | -4.23 | -4.39 |       |       |       |   |
| GENE1132X | 15084_at   | 15084_at   | 1        | 0.13  | -1.18 | -2.25 | 0     | -1.25 | -2.25 | - |
| 0.43      | -2.05      | -2.49      | -0.09    | -1.83 | -3.14 | -2.43 |       |       |       |   |
| GENE1131X | 18316_at   | 18316_at   | 1        | -0.16 | -1.17 | -1.35 | 0.16  | -0.95 | -1.27 | - |
| 0.19      | -1.38      | -1.92      | -0.02    | -1.86 | -2.47 | -1.94 |       |       |       |   |
| GENE1177X | 19063_at   | 19063_at   | 1        | -0.7  | -1.42 | -4.15 | 0.62  | -1.25 | -3.57 | - |
| 0.53      | -3.74      | -4.42      | 0.46     | -3.06 | -4.42 | -2.67 |       |       |       |   |
| GENE1120X | 17416_at   | 17416_at   | 1        | -0.33 | -0.17 | -1.74 | -0.02 | -0.42 | -1.84 | - |
| 0.34      | -1.56      | -2.07      | -0.24    | -1.81 | -2.32 | -1.46 |       |       |       |   |
| GENE1119X | 19382_at   | 19382_at   | 1        | 0     | -0.58 | -1.58 | -0.04 | -0.48 | -1.53 | - |
| 0.4       | -1.52      | -2.19      | -0.21    | -1.87 | -2.11 | -1.56 |       |       |       |   |
| GENE1118X | 17387_at   | 17387_at   | 1        | -0.14 | -0.67 | -1.97 | 0.19  | -0.74 | -2.15 | - |
| 0.28      | -1.97      | -2.8       | -0.66    | -2.25 | -2.61 | -1.92 |       |       |       |   |
| GENE1115X | 19211_at   | 19211_at   | 1        | -0.07 | -0.77 | -2.59 | 0.14  | -0.47 | -2.43 | - |
| 0.08      | -2.15      | -2.16      | -0.00822 | -2.4  | -2.51 | -2.53 |       |       |       |   |
| GENE1218X | 16599_s_at | 16599_s_at | 1        | -0.69 | -1    | -0.75 | -0.27 | -0.75 | -1.25 | - |
| 0.51      | -0.75      | -1.2       | -0.33    | -0.72 | -1.81 | -0.83 |       |       |       |   |
| GENE1217X | 20376_at   | 20376_at   | 1        | -0.34 | -0.77 | -1.06 | -0.2  | -0.77 | -1.52 | - |
| 1.54      | -1.72      | -1.93      | 0.14     | -1.08 | -2.2  | -1.29 |       |       |       |   |

|           |            |            |       |       |       |       |         |       |       |    |
|-----------|------------|------------|-------|-------|-------|-------|---------|-------|-------|----|
| GENE1216X | 17520_s_at | 17520_s_at | 1     | -0.91 | -0.53 | -0.75 | -0.38   | -0.73 | -1.91 | -  |
|           | 1.17       | -1.43      | -1.79 | -0.34 | -1.22 | -2.09 | -1.59   |       |       |    |
| GENE1215X | 19617_at   | 19617_at   | 1     | -0.06 | -0.6  | -0.92 | 0.14    | -0.49 | -1.23 | -  |
|           | 0.67       | -0.45      | -1.03 | 0.02  | -0.49 | -1.11 | -0.6    |       |       |    |
| GENE1214X | 12184_at   | 12184_at   | 1     | -0.63 | -0.66 | -1.6  | -0.06   | -0.71 | -1.69 | -  |
|           | 0.73       | -0.82      | -2.2  | -0.24 | -1    | -2.2  | -1.47   |       |       |    |
| GENE1210X | 15127_s_at | 15127_s_at | 1     | -0.36 | -0.51 | -0.74 | 0.00265 |       | -0.57 | -  |
|           | 0.95       | -0.76      | -0.87 | -1.08 | -0.33 | -0.78 | -1      | -0.7  |       |    |
| GENE1209X | 15366_at   | 15366_at   | 1     | -0.57 | -0.92 | -1.9  | -0.06   | -0.97 | -2.17 | -  |
|           | 1.34       | -1.61      | -1.68 | -0.09 | -1.32 | -1.68 | -0.92   |       |       |    |
| GENE1176X | 16458_s_at | 16458_s_at | 1     | -0.28 | -0.69 | -1.57 | -0.3    | -0.72 | -1.42 | -  |
|           | 0.41       | -1.3       | -1.34 | -0.2  | -1.42 | -1.46 | -1.33   |       |       |    |
| GENE1175X | 12300_at   | 12300_at   | 1     | -0.76 | -1.51 | -2.75 | -0.17   | -1.28 | -1.99 | -  |
|           | 1.11       | -2.56      | -2.1  | -0.51 | -2.66 | -2.23 | -2.2    |       |       |    |
| GENE1174X | 16101_s_at | 16101_s_at | 1     | -0.22 | -0.56 | -1.8  | -0.06   | -0.73 | -1.63 | -  |
|           | 0.62       | -1.59      | -1.77 | -0.49 | -1.67 | -1.45 | -0.77   |       |       |    |
| GENE1173X | 15737_at   | 15737_at   | 1     | -0.64 | -1.85 | -3.95 | -0.44   | -1.2  | -3.08 | -  |
|           | 1.42       | -3.44      | -3.36 | -0.94 | -2.92 | -3.73 | -1.94   |       |       |    |
| GENE1204X | 19381_at   | 19381_at   | 1     | -0.72 | -1.02 | -2.03 | 0.27    | -1.02 | -3.17 | -  |
|           | 0.85       | -2.5       | -1.49 | -0.92 | -2.21 | -2.9  | -1.48   |       |       |    |
| GENE1206X | 15578_s_at | 15578_s_at | 1     | -0.45 | -0.74 | -1.35 | -0.38   | -1.2  | -2.19 | -  |
|           | 0.52       | -1.34      | -1.96 | -0.4  | -1.8  | -2.05 | -1.53   |       |       |    |
| GENE1205X | 15167_s_at | 15167_s_at | 1     | -0.49 | -0.87 | -2.12 | -0.63   | -1.54 | -2.8  | -  |
|           | 1.34       | -1.83      | -2.62 | -0.57 | -1.91 | -3.12 | -1.56   |       |       |    |
| GENE1207X | 15126_s_at | 15126_s_at | 1     | -0.33 | -0.3  | -1.31 | -0.1    | -0.79 | -1.72 | -  |
|           | 0.56       | -1.53      | -1.67 | -0.68 | -1.33 | -1.62 | -1.49   |       |       |    |
| GENE180X  | 18533_at   | 18533_at   | 1     | -1.53 | -1.64 | -3.85 | -1.24   | -1.53 | -4    | -  |
|           | 1.93       | -3.93      | -3.26 | -1.57 | -3.47 | -4.36 | -3.75   |       |       |    |
| GENE942X  | 13698_at   | 13698_at   | 1     | -0.49 | -0.26 | -0.23 | -0.13   | -0.75 | -1    | -  |
|           | 0.69       | -0.81      | -0.78 | -0.39 | -1.16 | -0.91 | -0.46   |       |       |    |
| GENE941X  | 18687_at   | 18687_at   | 1     | -0.37 | -0.29 | -0.15 | -0.18   | -0.57 | -0.92 | -  |
|           | 0.55       | -1.12      | -0.75 | -0.4  | -1.39 | -1.09 | -0.39   |       |       |    |
| GENE940X  | 15544_at   | 15544_at   | 1     | -1.54 | -0.33 | -0.88 | -0.78   | -1.15 | -2.28 | -  |
|           | 1.49       | -2.58      | -2.12 | -0.84 | -2.37 | -1.91 | -0.06   |       |       |    |
| GENE920X  | 19245_at   | 19245_at   | 1     | -1    | -1.61 | -1.17 | 0.12    | -1.11 | -2.84 | -1 |
|           | -3.37      | -2.61      | -1.67 | -3.11 | -1.84 | -0.79 |         |       |       |    |
| GENE194X  | 13024_at   | 13024_at   | 1     | -0.36 | -0.51 | -0.45 | -0.16   | -0.4  | -1.74 | -  |
|           | 0.39       | -1.62      | -1.11 | -0.18 | -1.73 | -1.18 | -0.95   |       |       |    |
| GENE924X  | 15112_s_at | 15112_s_at | 1     | -0.3  | -0.39 | -0.57 | -0.21   | -0.85 | -0.93 | -  |
|           | 0.25       | -0.82      | -0.83 | -0.07 | -1.27 | -0.89 | -0.62   |       |       |    |
| GENE923X  | 14098_at   | 14098_at   | 1     | -0.25 | -0.49 | -0.43 | -0.45   | -0.92 | -0.98 | -  |
|           | 0.28       | -0.92      | -0.73 | -0.5  | -1.58 | -0.95 | -0.31   |       |       |    |
| GENE204X  | 12901_s_at | 12901_s_at | 1     | -0.08 | -0.65 | -0.51 | -0.73   | -1.18 | -1.45 | -  |
|           | 0.38       | -0.65      | -0.97 | -0.53 | -1.09 | -1.15 | -0.35   |       |       |    |
| GENE470X  | 19117_s_at | 19117_s_at | 1     | -0.25 | -0.74 | -0.76 | -0.17   | -1.4  | -1.02 | -  |
|           | 0.64       | -1.45      | -1.28 | -0.23 | -1.22 | -1.73 | -1.58   |       |       |    |
| GENE469X  | 15624_s_at | 15624_s_at | 1     | -0.2  | -0.66 | -0.75 | -0.25   | -1.3  | -1    | -  |
|           | 0.51       | -1.13      | -1.38 | -0.35 | -1.27 | -1.76 | -0.98   |       |       |    |
| GENE468X  | 15947_at   | 15947_at   | 1     | -0.48 | -0.91 | -0.91 | -0.6    | -1.36 | -0.79 | -  |
|           | 0.63       | -1.7       | -1.88 | -0.63 | -1.28 | -2.23 | -1.7    |       |       |    |
| GENE467X  | 17395_s_at | 17395_s_at | 1     | 0.08  | -0.45 | -0.39 | -0.5    | -0.71 | -0.65 | -  |
|           | 0.34       | -1.06      | -1.34 | -0.48 | -1.24 | -0.97 | -0.88   |       |       |    |
| GENE466X  | 12166_i_at | 12166_i_at | 1     | -0.82 | -1.19 | -1.09 | -0.71   | -1.48 | -1.83 | -  |
|           | 1.2        | -2.38      | -2.49 | -0.43 | -2.19 | -2.19 | -2.12   |       |       |    |
| GENE465X  | 15472_at   | 15472_at   | 1     | -0.77 | -1.17 | -0.94 | -0.96   | -1.41 | -2.51 | -  |
|           | 1.42       | -2.57      | -2.27 | -1.42 | -2.68 | -1.98 | -2.16   |       |       |    |

|          |            |            |       |         |       |       |       |       |       |
|----------|------------|------------|-------|---------|-------|-------|-------|-------|-------|
| GENE417X | 12800_at   | 12800_at   | 1     | 0.00854 | -0.51 | -0.68 | -0.24 | -0.48 | -     |
| 0.78     | -0.13      | -1.27      | -1.71 | -0.28   | -1.53 | -2.18 | -1.11 |       |       |
| GENE416X | 16509_at   | 16509_at   | 1     | -0.1    | -0.83 | -1.31 | -0.27 | -0.81 | -1.26 |
| 0.43     | -2.08      | -2.4       | -0.54 | -2.15   | -3.26 | -1.48 |       |       |       |
| GENE415X | 12741_at   | 12741_at   | 1     | 0.23    | -0.54 | -0.9  | -0.52 | -0.75 | -1.19 |
| 0.31     | -2.01      | -2.3       | -0.75 | -2.28   | -3.23 | -1.46 |       |       |       |
| GENE414X | 20640_s_at | 20640_s_at | 1     | 0.00779 | -0.75 | -1.03 | -0.4  | -0.82 | -     |
| 1.25     | -0.52      | -2.33      | -2.52 | -0.87   | -2.45 | -3.33 | -1.8  |       |       |
| GENE413X | 17394_s_at | 17394_s_at | 1     | -0.21   | -0.69 | -0.98 | -0.57 | -0.62 | -1.28 |
| 0.78     | -2.26      | -2.46      | -1.03 | -2.47   | -3.31 | -1.65 |       |       |       |
| GENE425X | 18089_r_at | 18089_r_at | 1     | -0.02   | -0.34 | -0.51 | -0.15 | -0.53 | -0.46 |
| 0.19     | -1.07      | -1.34      | -0.4  | -1.3    | -1.76 | -1.22 |       |       |       |
| GENE424X | 18088_i_at | 18088_i_at | 1     | -0.07   | -0.54 | -0.64 | -0.15 | -0.61 | -0.84 |
| 0.3      | -1.28      | -1.61      | -0.47 | -1.64   | -2.26 | -1.57 |       |       |       |
| GENE423X | 18074_at   | 18074_at   | 1     | -0.12   | -0.43 | -0.55 | -0.36 | -0.59 | -0.83 |
| 0.38     | -1.52      | -1.64      | -0.44 | -1.74   | -2.24 | -1.59 |       |       |       |
| GENE422X | 18076_s_at | 18076_s_at | 1     | -0.14   | -0.5  | -0.72 | -0.27 | -0.77 | -0.83 |
| 0.27     | -1.51      | -1.78      | -0.33 | -1.92   | -2.28 | -1.52 |       |       |       |
| GENE421X | 16497_at   | 16497_at   | 1     | -0.22   | -0.67 | -0.67 | -0.28 | -0.67 | -0.77 |
| 0.47     | -1.68      | -1.64      | -0.63 | -1.85   | -2.54 | -1.93 |       |       |       |
| GENE420X | 20050_at   | 20050_at   | 1     | -0.13   | -0.6  | -0.89 | -0.05 | -0.61 | -0.72 |
| 0.6      | -1.74      | -2.02      | -0.7  | -1.97   | -2.4  | -1.98 |       |       |       |
| GENE419X | 13020_at   | 13020_at   | 1     | -0.41   | -0.51 | -0.91 | -0.15 | -0.51 | -0.7  |
| 0.62     | -1.81      | -2.36      | -0.59 | -2.15   | -2.86 | -1.8  |       |       |       |
| GENE418X | 17393_at   | 17393_at   | 1     | -0.29   | -0.96 | -0.79 | -0.57 | -0.67 | -1.08 |
| 0.82     | -2.35      | -2.72      | -1.11 | -2.37   | -3.13 | -2.11 |       |       |       |
| GENE412X | 12015_at   | 12015_at   | 1     | -0.27   | -0.95 | -0.91 | -0.21 | -0.93 | -1.06 |
| 0.5      | -2.39      | -2.04      | -0.72 | -1.88   | -2.68 | -1.88 |       |       |       |
| GENE409X | 16135_at   | 16135_at   | 1     | -0.2    | -0.74 | -0.68 | -0.33 | -0.8  | -0.89 |
| 0.56     | -1.59      | -1.63      | -0.54 | -1.94   | -2.15 | -1.3  |       |       |       |
| GENE408X | 13150_at   | 13150_at   | 1     | -0.11   | -0.74 | -0.7  | -0.32 | -0.62 | -0.75 |
| 0.5      | -1.64      | -1.71      | -0.63 | -1.85   | -1.96 | -1.51 |       |       |       |
| GENE407X | 19964_g_at | 19964_g_at | 1     | -0.3    | -0.88 | -1.22 | -0.41 | -1.08 | -1.34 |
| 0.73     | -2.46      | -2.39      | -0.94 | -2.77   | -3.07 | -2.37 |       |       |       |
| GENE406X | 18677_at   | 18677_at   | 1     | -0.29   | -0.77 | -0.93 | -0.6  | -0.93 | -1.06 |
| 0.47     | -1.95      | -2.18      | -0.78 | -2.18   | -3.17 | -1.91 |       |       |       |
| GENE405X | 20164_at   | 20164_at   | 1     | -0.26   | -0.67 | -1.09 | -0.32 | -0.81 | -1.14 |
| 0.59     | -1.75      | -1.96      | -0.7  | -1.94   | -2.75 | -1.9  |       |       |       |
| GENE404X | 17454_at   | 17454_at   | 1     | -0.3    | -0.75 | -1.13 | -0.49 | -0.79 | -1.39 |
| 0.65     | -2.17      | -2.34      | -0.72 | -2.4    | -3.23 | -1.98 |       |       |       |
| GENE403X | 11994_at   | 11994_at   | 1     | -0.29   | -1.1  | -1.57 | -0.68 | -1.23 | -1.95 |
| 0.79     | -2.93      | -3.51      | -1.01 | -3.34   | -4.68 | -2.95 |       |       |       |
| GENE402X | 18053_s_at | 18053_s_at | 1     | -0.39   | -0.4  | -0.86 | -0.37 | -0.7  | -1.1  |
| 0.65     | -1.82      | -1.93      | -0.82 | -2.18   | -2.65 | -1.75 |       |       |       |
| GENE401X | 19963_at   | 19963_at   | 1     | -0.19   | -0.63 | -1.03 | -0.42 | -0.82 | -1.3  |
| 0.57     | -2.12      | -2.47      | -1.04 | -2.48   | -3.09 | -2.16 |       |       |       |
| GENE400X | 15986_s_at | 15986_s_at | 1     | -0.28   | -0.61 | -0.84 | -0.32 | -0.67 | -0.98 |
| 0.47     | -1.83      | -1.76      | -0.73 | -1.99   | -2.61 | -1.55 |       |       |       |
| GENE399X | 17420_at   | 17420_at   | 1     | -0.31   | -0.88 | -1.19 | -0.64 | -0.94 | -1.44 |
| 0.89     | -2.81      | -2.67      | -1.12 | -3.08   | -3.66 | -2.34 |       |       |       |
| GENE392X | 12336_at   | 12336_at   | 1     | -0.41   | -0.81 | -1.05 | -0.32 | -0.98 | -1.15 |
| 0.73     | -2.41      | -2.79      | -0.79 | -3.03   | -2.29 | -1.9  |       |       |       |
| GENE391X | 19968_at   | 19968_at   | 1     | -0.72   | -1.14 | -2.38 | -0.05 | -0.92 | -1.48 |
| 1.44     | -3.52      | -4.65      | -1.03 | -4      | -4.06 | -2.92 |       |       |       |
| GENE383X | 14571_at   | 14571_at   | 1     | -0.36   | -0.45 | -0.83 | -0.42 | -0.41 | -1.05 |
| 0.65     | -1.7       | -2.02      | -0.76 | -2      | -2.42 | -2    |       |       |       |

|          |            |            |       |       |       |       |       |       |       |   |
|----------|------------|------------|-------|-------|-------|-------|-------|-------|-------|---|
| GENE382X | 17916_at   | 17916_at   | 1     | -0.53 | -0.67 | -1.17 | -0.82 | -0.86 | -1.71 | - |
|          | 1.08       | -2.37      | -2.86 | -1.01 | -2.7  | -3.11 | -2.68 |       |       |   |
| GENE381X | 18431_at   | 18431_at   | 1     | -0.9  | -0.78 | -1.5  | -0.72 | -0.7  | -2.5  | - |
|          | 1.34       | -3.63      | -3.76 | -1.02 | -3.63 | -3.76 | -3.13 |       |       |   |
| GENE411X | 18733_r_at | 18733_r_at | 1     | -0.31 | -0.41 | -1.01 | -0.26 | -0.73 | -1.03 | - |
|          | 0.45       | -1.66      | -1.81 | -0.51 | -1.84 | -2.14 | -1.6  |       |       |   |
| GENE410X | 19996_at   | 19996_at   | 1     | -0.37 | -0.86 | -1.47 | -0.62 | -0.99 | -1.42 | - |
|          | 0.76       | -2.69      | -3.11 | -0.93 | -2.84 | -3.17 | -2.16 |       |       |   |
| GENE349X | 19887_s_at | 19887_s_at | 1     | -0.27 | -0.53 | -1.07 | -0.3  | -0.65 | -1.31 | - |
|          | 0.87       | -1.99      | -2    | -0.95 | -2.55 | -2.45 | -1.65 |       |       |   |
| GENE348X | 20067_at   | 20067_at   | 1     | -0.7  | -0.65 | -1.45 | -0.49 | -0.91 | -1.4  | - |
|          | 1.13       | -2.29      | -2.59 | -0.79 | -2.65 | -2.83 | -1.75 |       |       |   |
| GENE427X | 17863_at   | 17863_at   | 1     | -0.14 | -0.38 | -1.02 | -0.07 | -0.28 | -0.76 | - |
|          | 1.18       | -1.18      | -1.42 | 0     | -1.5  | -1.76 | -1.09 |       |       |   |
| GENE426X | 12054_at   | 12054_at   | 1     | -0.28 | -0.35 | -0.92 | -0.02 | -0.18 | -1.08 | - |
|          | 0.95       | -1.86      | -1.38 | -0.41 | -1.97 | -2.32 | -0.91 |       |       |   |
| GENE347X | 20506_at   | 20506_at   | 1     | -0.62 | -0.69 | -1.45 | -0.48 | -0.64 | -1.93 | - |
|          | 1.19       | -2.23      | -1.98 | -0.91 | -2.64 | -2.83 | -1.59 |       |       |   |
| GENE346X | 15372_at   | 15372_at   | 1     | -0.51 | -0.61 | -1.26 | -0.41 | -0.45 | -1.51 | - |
|          | 1.25       | -2.43      | -2.05 | -1.16 | -2.54 | -2.82 | -1.77 |       |       |   |
| GENE345X | 13482_at   | 13482_at   | 1     | -0.96 | -0.96 | -2.1  | -0.89 | -0.71 | -2.17 | - |
|          | 1.76       | -3.03      | -2.96 | -1.53 | -4.03 | -4.1  | -2.86 |       |       |   |
| GENE109X | 12560_at   | 12560_at   | 1     | -0.49 | -0.32 | -0.67 | -0.3  | -0.23 | -1    | - |
|          | 0.79       | -1.1       | -1.06 | -0.39 | -1.25 | -1.63 | -1.01 |       |       |   |
| GENE108X | 13492_at   | 13492_at   | 1     | -1.05 | -0.9  | -2.24 | -1    | -0.4  | -3.2  | - |
|          | 1.71       | -3.03      | -3.07 | -1.39 | -3.68 | -4.72 | -2.6  |       |       |   |
| GENE380X | 18638_at   | 18638_at   | 1     | -0.24 | -0.08 | -0.64 | -0.4  | -0.34 | -0.82 | - |
|          | 0.48       | -1.14      | -1.78 | -0.56 | -1.45 | -2.13 | -1.12 |       |       |   |
| GENE379X | 18288_at   | 18288_at   | 1     | -0.31 | -0.13 | -1.16 | -0.56 | -0.11 | -1.48 | - |
|          | 0.69       | -1.82      | -2.36 | -0.83 | -2.17 | -3.15 | -1.65 |       |       |   |
| GENE378X | 15990_at   | 15990_at   | 1     | -0.14 | -0.34 | -1.17 | -0.62 | -0.27 | -1.32 | - |
|          | 0.61       | -2.33      | -2.44 | -1.17 | -2.59 | -3.63 | -2.01 |       |       |   |
| GENE377X | 18736_at   | 18736_at   | 1     | -0.43 | -0.66 | -1.2  | -0.44 | -0.93 | -1.41 | - |
|          | 0.6        | -1.83      | -2.13 | -0.7  | -1.94 | -2.76 | -1.77 |       |       |   |
| GENE376X | 17947_at   | 17947_at   | 1     | -0.24 | -0.62 | -1.16 | -0.48 | -0.78 | -1.47 | - |
|          | 0.57       | -1.78      | -2.09 | -0.86 | -1.99 | -3.16 | -1.96 |       |       |   |
| GENE375X | 14579_at   | 14579_at   | 1     | -0.38 | -0.7  | -1.13 | -0.55 | -0.92 | -1.55 | - |
|          | 0.75       | -2.13      | -2.51 | -0.93 | -2.24 | -3.43 | -2.07 |       |       |   |
| GENE374X | 18052_s_at | 18052_s_at | 1     | -0.57 | -0.58 | -1.44 | -0.59 | -0.77 | -1.49 | - |
|          | 0.93       | -1.99      | -2.29 | -1.02 | -2.07 | -3.16 | -1.86 |       |       |   |
| GENE373X | 12135_at   | 12135_at   | 1     | -0.5  | -1.01 | -2.05 | -0.9  | -0.88 | -2.05 | - |
|          | 1.56       | -2.84      | -3.31 | -1.18 | -3.42 | -5.16 | -2.9  |       |       |   |
| GENE372X | 18281_at   | 18281_at   | 1     | -0.41 | -0.33 | -1.12 | -0.57 | -0.68 | -1.46 | - |
|          | 0.75       | -1.83      | -2.44 | -0.87 | -2.17 | -3.52 | -2.22 |       |       |   |
| GENE371X | 18634_at   | 18634_at   | 1     | -0.27 | -0.69 | -1.88 | -0.4  | -1.11 | -1.61 | - |
|          | 0.92       | -2.6       | -3.17 | -0.98 | -2.83 | -5.01 | -2.78 |       |       |   |
| GENE370X | 18086_s_at | 18086_s_at | 1     | -0.32 | -0.46 | -0.72 | -0.29 | -0.45 | -1.2  | - |
|          | 0.76       | -1.54      | -1.8  | -0.54 | -1.95 | -2.86 | -1.44 |       |       |   |
| GENE369X | 18087_s_at | 18087_s_at | 1     | -0.75 | -0.72 | -1.13 | -0.77 | -0.75 | -1.63 | - |
|          | 1.15       | -2.29      | -2.34 | -0.73 | -2.62 | -3.46 | -2.27 |       |       |   |
| GENE368X | 18588_at   | 18588_at   | 1     | -0.45 | -0.54 | -0.97 | -0.64 | -0.7  | -1.48 | - |
|          | 0.86       | -2.08      | -2.48 | -0.56 | -2.59 | -3.59 | -2.15 |       |       |   |
| GENE367X | 16548_at   | 16548_at   | 1     | -0.59 | -0.52 | -1.04 | -0.91 | -1.03 | -1.75 | - |
|          | 1.17       | -2.35      | -2.9  | -1.06 | -3.12 | -4.18 | -2.53 |       |       |   |
| GENE366X | 14501_at   | 14501_at   | 1     | -0.14 | -0.31 | -0.75 | -0.44 | -0.33 | -1.09 | - |
|          | 0.58       | -0.86      | -1.25 | -0.5  | -1.11 | -1.78 | -0.81 |       |       |   |

|          |            |            |       |       |       |       |       |       |       |    |
|----------|------------|------------|-------|-------|-------|-------|-------|-------|-------|----|
| GENE365X | 17526_s_at | 17526_s_at | 1     | -0.53 | -0.74 | -1.28 | -0.55 | -0.86 | -1.7  | -  |
|          | 1.19       | -1.94      | -2.35 | -0.9  | -2.54 | -3.6  | -1.48 |       |       |    |
| GENE364X | 19834_at   | 19834_at   | 1     | -0.71 | -1.41 | -2.29 | -0.94 | -0.81 | -3.5  | -  |
|          | 2.14       | -3.59      | -4.17 | -1.79 | -4.06 | -5.91 | -2.38 |       |       |    |
| GENE363X | 18296_at   | 18296_at   | 1     | -0.63 | -0.17 | -1.62 | -0.68 | -0.69 | -2.45 | -  |
|          | 0.95       | -1.92      | -2.96 | -1.05 | -2.9  | -3.69 | -2    |       |       |    |
| GENE362X | 15093_at   | 15093_at   | 1     | -0.39 | -1.03 | -1.75 | -0.56 | -1.03 | -1.8  | -  |
|          | 0.8        | -2.1       | -2.94 | -0.91 | -2.8  | -4.07 | -1.68 |       |       |    |
| GENE361X | 16485_s_at | 16485_s_at | 1     | -0.4  | -0.76 | -1.57 | -0.45 | -0.85 | -1.64 | -  |
|          | 0.98       | -2.5       | -2.57 | -1.05 | -2.69 | -3.51 | -1.84 |       |       |    |
| GENE360X | 13573_at   | 13573_at   | 1     | -0.36 | -1.05 | -2.07 | -0.78 | -0.67 | -1.87 | -  |
|          | 1.09       | -2.92      | -3    | -1.25 | -2.92 | -4.05 | -1.79 |       |       |    |
| GENE388X | 17506_s_at | 17506_s_at | 1     | -0.37 | -0.11 | -0.59 | -0.34 | -0.68 | -0.88 | -  |
|          | 0.62       | -1.12      | -1.39 | -0.68 | -1.37 | -1.81 | -1.2  |       |       |    |
| GENE387X | 16136_at   | 16136_at   | 1     | -0.49 | -0.5  | -1.27 | -0.73 | -1.07 | -1.95 | -  |
|          | 0.87       | -1.95      | -2.42 | -1.02 | -2.55 | -3.11 | -2.06 |       |       |    |
| GENE386X | 15182_at   | 15182_at   | 1     | -0.63 | -0.67 | -1.21 | -0.87 | -1    | -2.08 | -  |
|          | 1.04       | -2.33      | -2.83 | -1.43 | -2.56 | -3.79 | -1.98 |       |       |    |
| GENE385X | 15521_at   | 15521_at   | 1     | -0.57 | -0.82 | -1.02 | -0.88 | -1.13 | -1.36 | -  |
|          | 1.03       | -2.32      | -2.63 | -1.28 | -2.76 | -3.22 | -1.79 |       |       |    |
| GENE384X | 16124_s_at | 16124_s_at | 1     | -0.7  | -0.8  | -1.19 | -0.84 | -1.14 | -1.59 | -  |
|          | 0.8        | -2.19      | -2.91 | -1.04 | -2.89 | -3.21 | -1.94 |       |       |    |
| GENE355X | 17532_at   | 17532_at   | 1     | -0.44 | -0.34 | -0.94 | -0.46 | -0.74 | -1.15 | -  |
|          | 0.72       | -1.53      | -1.72 | -0.93 | -1.92 | -2.29 | -1.26 |       |       |    |
| GENE354X | 15209_s_at | 15209_s_at | 1     | -0.59 | -0.55 | -1.16 | -1    | -0.9  | -1.65 | -  |
|          | 1.22       | -2.59      | -2.66 | -1.25 | -3.12 | -3.79 | -1.94 |       |       |    |
| GENE353X | 14508_at   | 14508_at   | 1     | -0.62 | -0.64 | -1.86 | -0.79 | -1.13 | -2.13 | -  |
|          | 1.03       | -2.87      | -2.63 | -1.41 | -3.51 | -4.41 | -2.38 |       |       |    |
| GENE352X | 18688_at   | 18688_at   | 1     | -0.34 | -0.45 | -0.87 | -0.45 | -0.81 | -1.37 | -1 |
|          | -1.73      | -1.67      | -0.94 | -2.17 | -2.25 | -1.03 |       |       |       |    |
| GENE351X | 14986_at   | 14986_at   | 1     | -0.64 | -0.63 | -1.11 | -0.94 | -1.14 | -1.81 | -  |
|          | 1.19       | -2.3       | -2.04 | -1.1  | -2.69 | -2.92 | -1.5  |       |       |    |
| GENE350X | 17975_at   | 17975_at   | 1     | -0.77 | -0.92 | -2.1  | -1.33 | -1.44 | -2.67 | -  |
|          | 2.33       | -2.82      | -3.38 | -1.86 | -4.17 | -4.82 | -2.79 |       |       |    |
| GENE359X | 18083_r_at | 18083_r_at | 1     | -0.08 | -0.33 | -0.42 | -0.19 | -0.44 | -0.71 | -  |
|          | 0.37       | -0.73      | -0.89 | -0.12 | -1.09 | -1.35 | -0.53 |       |       |    |
| GENE358X | 16018_s_at | 16018_s_at | 1     | -0.33 | -0.65 | -0.94 | -0.27 | -0.89 | -1.37 | -  |
|          | 0.72       | -2.23      | -2.15 | -0.56 | -2.33 | -2.9  | -1.57 |       |       |    |
| GENE357X | 16517_at   | 16517_at   | 1     | -0.08 | -0.68 | -0.86 | -0.24 | -1    | -1.37 | -  |
|          | 0.61       | -2.36      | -2.21 | -0.69 | -3.02 | -3.49 | -1.7  |       |       |    |
| GENE356X | 18276_at   | 18276_at   | 1     | -0.42 | -1.21 | -1.11 | -0.41 | -1.2  | -1.61 | -  |
|          | 0.87       | -2.68      | -2.04 | -0.59 | -3.05 | -3.45 | -2.02 |       |       |    |
| GENE344X | 13608_at   | 13608_at   | 1     | -0.18 | -0.36 | -0.86 | -0.91 | -0.92 | -1.11 | -  |
|          | 0.97       | -2.23      | -2.24 | -0.71 | -3.15 | -3.11 | -1.23 |       |       |    |
| GENE343X | 15644_at   | 15644_at   | 1     | -0.48 | -0.38 | -1.16 | -0.82 | -0.68 | -1.99 | -  |
|          | 1.15       | -2.85      | -2.45 | -1.08 | -3.09 | -3.99 | -1    |       |       |    |
| GENE342X | 12745_at   | 12745_at   | 1     | -0.3  | -0.72 | -1.66 | -0.93 | -0.89 | -2.02 | -  |
|          | 1.25       | -2.99      | -3.03 | -1.42 | -3.49 | -4.65 | -1.53 |       |       |    |
| GENE341X | 18628_at   | 18628_at   | 1     | -0.43 | -0.63 | -1.35 | -0.76 | -1.03 | -1.6  | -  |
|          | 1.05       | -3.11      | -2.49 | -1.37 | -3.93 | -4.77 | -1.52 |       |       |    |
| GENE202X | 13590_at   | 13590_at   | 1     | -0.09 | -0.06 | -0.44 | -0.22 | -0.56 | -0.83 | -  |
|          | 0.21       | -0.68      | -0.75 | -0.29 | -1.05 | -1.24 | -0.41 |       |       |    |
| GENE201X | 19227_at   | 19227_at   | 1     | -0.41 | -0.15 | -0.63 | -0.13 | -0.49 | -1.35 | -  |
|          | 0.74       | -1.2       | -1.32 | -0.33 | -1.51 | -1.86 | -0.71 |       |       |    |
| GENE200X | 19402_at   | 19402_at   | 1     | -0.75 | -0.24 | -0.81 | -0.58 | -0.82 | -1.31 | -  |
|          | 1.11       | -1.13      | -1.52 | -0.47 | -1.3  | -2.01 | -0.58 |       |       |    |

|           |            |            |       |       |       |       |          |       |       |    |
|-----------|------------|------------|-------|-------|-------|-------|----------|-------|-------|----|
| GENE199X  | 18051_r_at | 18051_r_at | 1     | -0.62 | -0.54 | -1.18 | -0.81    | -0.64 | -1.46 | -  |
| 1.32      | -1.24      | -1.74      | -0.34 | -1.87 | -2.77 | -0.79 |          |       |       |    |
| GENE198X  | 16622_s_at | 16622_s_at | 1     | -0.32 | -0.27 | -0.85 | -0.79    | -0.49 | -1.32 | -1 |
|           | -0.6       | -1.07      | -0.67 | -1.5  | -1.67 | -0.75 |          |       |       |    |
| GENE190X  | 19653_g_at | 19653_g_at | 1     | -0.66 | -0.37 | -2.22 | -0.78    | -1.13 | -3.22 | -  |
| 1.54      | -1.45      | -3.48      | -0.54 | -2.13 | -3.48 | -2.13 |          |       |       |    |
| GENE189X  | 17050_s_at | 17050_s_at | 1     | -0.2  | -0.84 | -1.76 | -0.81    | -0.58 | -2.35 | -  |
| 1.75      | -1.58      | -2.67      | -0.5  | -2.17 | -3.08 | -1.78 |          |       |       |    |
| GENE188X  | 18309_s_at | 18309_s_at | 1     | -0.39 | -0.43 | -0.77 | -0.11    | -0.35 | -1.01 | -  |
| 0.78      | -0.64      | -0.84      | -0.28 | -0.89 | -1.79 | -1.12 |          |       |       |    |
| GENE187X  | 16214_at   | 16214_at   | 1     | -1    | -1.1  | -1.75 | -1       | -1.03 | -2.44 | -  |
| 1.49      | -1.61      | -2.44      | -1.26 | -1.61 | -3.61 | -2.92 |          |       |       |    |
| GENE186X  | 16978_g_at | 16978_g_at | 1     | -0.72 | -0.52 | -1.77 | -1.23    | -1.31 | -2.77 | -  |
| 1.37      | -1.94      | -2.54      | -1.26 | -2.72 | -5.26 | -2.67 |          |       |       |    |
| GENE205X  | 13253_f_at | 13253_f_at | 1     | -0.09 | -0.59 | -0.89 | -0.12    | -0.92 | -1.19 | -  |
| 0.26      | -0.73      | -1.22      | -0.79 | -0.86 | -1.45 | -0.47 |          |       |       |    |
| GENE74X   | 19913_at   | 19913_at   | 1     | -0.42 | -0.82 | -1.12 | -0.47    | -1.02 | -0.85 | -  |
| 0.93      | -1.52      | -1.75      | -0.84 | -1.2  | -1.96 | -0.72 |          |       |       |    |
| GENE73X   | 16160_f_at | 16160_f_at | 1     | -0.31 | -0.68 | -0.8  | -0.65    | -1.12 | -0.91 | -  |
| 0.77      | -1.07      | -1.48      | -0.65 | -1.59 | -1.54 | -0.62 |          |       |       |    |
| GENE76X   | 13052_s_at | 13052_s_at | 1     | -0.56 | -0.63 | -1.58 | -0.19    | -0.78 | -1.18 | -  |
| 0.86      | -1.56      | -1.66      | -1.73 | -1.86 | -2.51 | -0.72 |          |       |       |    |
| GENE75X   | 12984_at   | 12984_at   | 1     | -0.41 | -0.71 | -1.45 | -0.21    | -1.06 | -1    | -  |
| 0.67      | -1.52      | -1.65      | -1.3  | -2.2  | -1.65 | -0.82 |          |       |       |    |
| GENE1261X | 13062_at   | 13062_at   | 1     | 0.03  | 0.14  | 0.1   | -0.00901 |       | -0.33 | -  |
| 0.61      | -0.08      | -0.09      | -0.34 | -0.14 | -0.72 | -1.18 | -0.92    |       |       |    |
| GENE1254X | 15452_at   | 15452_at   | 1     | -0.11 | 0.39  | 0.23  | -0.19    | -0.38 | -0.84 | -  |
| 0.38      | -0.31      | -0.52      | -0.26 | -1.45 | -1.61 | -0.83 |          |       |       |    |
| GENE1104X | 15134_s_at | 15134_s_at | 1     | -0.43 | 0.02  | 0.32  | -0.33    | -0.69 | -0.77 | -  |
| 0.5       | -0.87      | -0.6       | -0.44 | -1.36 | -1.63 | -1.43 |          |       |       |    |
| GENE1103X | 18036_s_at | 18036_s_at | 1     | -0.16 | 0.09  | 0.19  | -0.28    | -0.49 | -0.69 | -  |
| 0.35      | -0.57      | -0.19      | -0.4  | -1.4  | -0.96 | -0.75 |          |       |       |    |
| GENE1100X | 12224_at   | 12224_at   | 1     | -0.45 | 0.31  | -0.31 | -0.49    | -0.09 | -0.89 | -  |
| 0.35      | -0.52      | -0.49      | -0.1  | -0.95 | -0.77 | -1.17 |          |       |       |    |
| GENE1099X | 16647_s_at | 16647_s_at | 1     | -0.25 | 0.38  | 0.11  | -0.47    | -0.8  | -1.27 | -  |
| 0.2       | -0.88      | -0.8       | -0.06 | -1.85 | -1.75 | -2.56 |          |       |       |    |
| GENE1097X | 19896_s_at | 19896_s_at | 1     | 0.08  | 0.19  | 0.23  | 0.21     | -0.25 | -0.68 | -  |
| 0.32      | -0.6       | -0.12      | -0.07 | -1.16 | -0.62 | -0.87 |          |       |       |    |
| GENE1096X | 14679_at   | 14679_at   | 1     | -0.13 | 0.22  | -0.11 | 0.09     | -0.38 | -1.42 | -  |
| 0.4       | -1.51      | -0.71      | -0.59 | -3.58 | -1.35 | -1.72 |          |       |       |    |
| GENE1098X | 13558_s_at | 13558_s_at | 1     | -0.02 | -0.08 | -0.42 | -0.09    | -0.54 | -1.13 | -  |
| 0.00608   |            | -1.14      | 0.01  | -0.9  | -1.67 | -0.72 | -1.29    |       |       |    |
| GENE197X  | 16540_s_at | 16540_s_at | 1     | 0.01  | -0.24 | -0.29 | -0.08    | -0.48 | -0.58 | -  |
| 0.27      | -0.73      | -0.18      | -0.31 | -1.02 | -0.78 | -0.64 |          |       |       |    |
| GENE193X  | 13557_r_at | 13557_r_at | 1     | 0.13  | -0.01 | -0.73 | -0.03    | -0.32 | -1.21 | -  |
| 0.01      | -0.95      | -0.64      | -0.43 | -1.86 | -1.09 | -0.96 |          |       |       |    |
| GENE1010X | 17998_s_at | 17998_s_at | 1     | -0.09 | 0.35  | -0.31 | -0.4     | -0.02 | -0.61 | -  |
| 0.66      | -0.77      | -0.82      | -0.67 | -1.48 | -1    | -0.37 |          |       |       |    |
| GENE1009X | 14436_at   | 14436_at   | 1     | -0.68 | 0.52  | 0.01  | -0.52    | 0.12  | -1.3  | -  |
| 1.05      | -1.1       | -1.78      | -1.49 | -3.1  | -2.39 | -1.76 |          |       |       |    |
| GENE1012X | 15664_at   | 15664_at   | 1     | -0.46 | 0.45  | -0.17 | -0.31    | -0.45 | -1    | -  |
| 0.78      | -1.08      | -0.94      | -0.7  | -1.51 | -1.5  | -0.93 |          |       |       |    |
| GENE1011X | 13084_at   | 13084_at   | 1     | -0.22 | 0.39  | -0.36 | -0.4     | -0.35 | -1.33 | -  |
| 0.8       | -0.83      | -1.07      | -0.59 | -1.54 | -1.85 | -0.97 |          |       |       |    |
| GENE211X  | 19356_at   | 19356_at   | 1     | -0.19 | -0.07 | -0.46 | 0.05     | -0.09 | -0.78 | -  |
| 0.77      | -0.82      | -1.15      | -0.52 | -1.63 | -1.71 | -1.26 |          |       |       |    |

|           |            |            |       |       |       |       |       |       |       |    |
|-----------|------------|------------|-------|-------|-------|-------|-------|-------|-------|----|
| GENE210X  | 12242_at   | 12242_at   | 1     | -0.64 | -0.44 | -0.7  | -0.71 | -0.27 | -1.05 | -  |
|           | 1.26       | -2.09      | -2.24 | -0.71 | -2.83 | -3.37 | -1.95 |       |       |    |
| GENE209X  | 17321_at   | 17321_at   | 1     | -0.51 | -0.33 | -0.58 | -0.51 | -0.14 | -1.34 | -1 |
|           | -1.96      | -1.72      | -0.65 | -3.1  | -2.72 | -1.72 |       |       |       |    |
| GENE208X  | 14912_at   | 14912_at   | 1     | -0.33 | 0.05  | -0.85 | -0.29 | -0.14 | -1.24 | -  |
|           | 0.83       | -1.89      | -2.24 | -0.67 | -2.89 | -2.44 | -1.23 |       |       |    |
| GENE207X  | 13144_at   | 13144_at   | 1     | -0.56 | -0.1  | -1.58 | -0.64 | -0.46 | -1.8  | -  |
|           | 0.7        | -2.36      | -2.58 | -1.04 | -3.74 | -3.58 | -2.48 |       |       |    |
| GENE206X  | 13546_at   | 13546_at   | 1     | -0.81 | 0.34  | -1.11 | -0.85 | -0.29 | -1.86 | -  |
|           | 0.79       | -2.88      | -2.86 | -1.61 | -4.26 | -4    | -3.07 |       |       |    |
| GENE1024X | 15213_s_at | 15213_s_at | 1     | -0.21 | -0.19 | -0.06 | -0.47 | -0.38 | -0.29 | -  |
|           | 0.48       | -1.04      | -0.85 | -0.44 | -1.03 | -1.01 | -0.4  |       |       |    |
| GENE1023X | 12798_at   | 12798_at   | 1     | -0.97 | -0.84 | -0.53 | -1.49 | -0.73 | -1.23 | -  |
|           | 1.4        | -2.92      | -1.96 | -1.13 | -2.82 | -2.86 | -1.48 |       |       |    |
| GENE1022X | 19626_i_at | 19626_i_at | 1     | -0.82 | -0.44 | -0.73 | -1.37 | -0.78 | -1.07 | -  |
|           | 1.82       | -2.37      | -2.32 | -1.37 | -3.51 | -3    | -1.48 |       |       |    |
| GENE1021X | 17018_s_at | 17018_s_at | 1     | -0.99 | -0.39 | -0.96 | -1.75 | -0.75 | -1.63 | -  |
|           | 2.5        | -3.4       | -3.05 | -2.09 | -3.92 | -4.01 | -1.74 |       |       |    |
| GENE1020X | 20442_i_at | 20442_i_at | 1     | -1.16 | -0.68 | -0.72 | -2.1  | -1.35 | -1.53 | -  |
|           | 3.03       | -4.38      | -3.93 | -2.31 | -5.3  | -5.14 | -1.74 |       |       |    |
| GENE1019X | 18215_at   | 18215_at   | 1     | -0.71 | -0.35 | -0.98 | -1.8  | -1.12 | -1.37 | -  |
|           | 2.09       | -3.2       | -2.57 | -1.62 | -3.91 | -3.19 | -2.16 |       |       |    |
| GENE901X  | 16996_s_at | 16996_s_at | 1     | 0.01  | -0.46 | -0.36 | -0.71 | -0.47 | -1.26 | -  |
|           | 1.09       | -2.97      | -1.74 | -0.99 | -3.05 | -2.45 | -1.2  |       |       |    |
| GENE900X  | 12212_at   | 12212_at   | 1     | -0.58 | -0.62 | -0.68 | -0.44 | -0.94 | -1.68 | -  |
|           | 1.63       | -4.38      | -2.49 | -0.8  | -4.19 | -3.9  | -2.15 |       |       |    |
| GENE291X  | 19867_at   | 19867_at   | 1     | -0.15 | -0.01 | 0.11  | -0.66 | -0.94 | -0.42 | -  |
|           | 0.73       | -1.85      | -1.35 | -0.69 | -2.34 | -2.02 | -1.12 |       |       |    |
| GENE290X  | 14557_at   | 14557_at   | 1     | -0.55 | -0.22 | 0.17  | -0.94 | -0.51 | -1.01 | -  |
|           | 0.75       | -1.4       | -1.23 | -0.6  | -2.48 | -1.8  | -1.33 |       |       |    |
| GENE307X  | 19144_at   | 19144_at   | 1     | -0.61 | -0.28 | -0.27 | -0.78 | -0.53 | -0.75 | -  |
|           | 0.81       | -0.97      | -0.87 | -0.6  | -1.47 | -1.34 | -0.82 |       |       |    |
| GENE306X  | 12914_s_at | 12914_s_at | 1     | -0.64 | -0.48 | -0.47 | -0.64 | -0.66 | -1.15 | -  |
|           | 1.06       | -1.25      | -1.25 | -1.18 | -2.04 | -1.73 | -1.11 |       |       |    |
| GENE305X  | 14596_at   | 14596_at   | 1     | -0.81 | -0.57 | -0.78 | -1.05 | -0.89 | -1.5  | -  |
|           | 1.55       | -2.01      | -1.47 | -1.63 | -2.66 | -2.64 | -1.88 |       |       |    |
| GENE304X  | 17592_at   | 17592_at   | 1     | -0.69 | -0.08 | -0.41 | -0.43 | -0.4  | -0.63 | -  |
|           | 1.1        | -1.59      | -1.21 | -0.7  | -1.75 | -1.57 | -1.04 |       |       |    |
| GENE303X  | 12001_at   | 12001_at   | 1     | -0.69 | -0.27 | -0.29 | -0.61 | -0.59 | -0.95 | -  |
|           | 1.67       | -2.35      | -1.67 | -1.38 | -2.82 | -2.67 | -1.76 |       |       |    |
| GENE302X  | 13572_s_at | 13572_s_at | 1     | -0.51 | -0.33 | -0.48 | -0.5  | -0.56 | -0.86 | -1 |
|           | -1.76      | -1.22      | -0.74 | -2.12 | -1.83 | -1.12 |       |       |       |    |
| GENE301X  | 19359_at   | 19359_at   | 1     | -0.73 | -0.46 | -0.32 | -0.45 | -0.92 | -1.51 | -  |
|           | 1.39       | -2.3       | -1.85 | -0.97 | -2.56 | -2.65 | -1.73 |       |       |    |
| GENE300X  | 20173_at   | 20173_at   | 1     | -0.68 | -0.09 | -0.44 | -0.72 | -0.43 | -1.43 | -  |
|           | 1.24       | -2.32      | -1.95 | -0.84 | -2.37 | -2.49 | -1.52 |       |       |    |
| GENE298X  | 11990_at   | 11990_at   | 1     | -0.4  | -0.44 | -0.2  | -0.49 | -0.2  | -0.79 | -  |
|           | 1.03       | -1.07      | -1.11 | -0.96 | -1.66 | -1.53 | -1.27 |       |       |    |
| GENE297X  | 16319_at   | 16319_at   | 1     | -0.5  | -0.35 | -0.52 | -0.47 | -0.32 | -1.19 | -  |
|           | 1.35       | -1.67      | -1.94 | -1.7  | -2.23 | -2.27 | -1.86 |       |       |    |
| GENE294X  | 14463_at   | 14463_at   | 1     | -0.18 | -0.18 | 0.02  | -0.45 | -0.5  | -0.93 | -  |
|           | 0.9        | -1.14      | -1.31 | -0.88 | -1.46 | -1.31 | -1.19 |       |       |    |
| GENE296X  | 15380_at   | 15380_at   | 1     | -1    | -0.16 | -0.62 | -0.39 | -0.84 | -2.04 | -  |
|           | 1.49       | -2.58      | -2.04 | -1.63 | -2.84 | -2.88 | -2.35 |       |       |    |
| GENE295X  | 12155_at   | 12155_at   | 1     | -1.43 | -0.05 | -0.97 | -1.55 | -0.2  | -2.64 | -  |
|           | 2.47       | -3.9       | -3.1  | -2.25 | -3.9  | -3.78 | -3.49 |       |       |    |



|          |            |            |       |       |       |       |       |       |       |    |
|----------|------------|------------|-------|-------|-------|-------|-------|-------|-------|----|
| GENE293X | 12727_f_at | 12727_f_at | 1     | -0.64 | -0.61 | -0.7  | -1.98 | -1.38 | -2.43 | -  |
|          | 2.37       | -4.15      | -3.43 | -3.05 | -4.15 | -3.21 | -2.98 |       |       |    |
| GENE238X | 18742_f_at | 18742_f_at | 1     | -0.49 | -0.26 | -1.31 | -1.14 | -0.92 | -2.11 | -  |
|          | 1.59       | -3.17      | -2.52 | -1.74 | -3.27 | -2.44 | -2.28 |       |       |    |
| GENE32X  | 14432_at   | 14432_at   | 1     | -0.55 | -0.76 | -1    | -1.29 | -1.23 | -2.18 | -  |
|          | 1.73       | -3.73      | -3.32 | -2.32 | -4    | -3.32 | -2.12 |       |       |    |
| GENE455X | 14737_s_at | 14737_s_at | 1     | -0.59 | -0.51 | -0.71 | -0.48 | -0.72 | -1.27 | -  |
|          | 1.12       | -2.12      | -1.88 | -0.71 | -2.28 | -2.96 | -1.54 |       |       |    |
| GENE454X | 12078_at   | 12078_at   | 1     | -0.49 | -0.76 | -0.87 | -0.63 | -0.74 | -1.19 | -  |
|          | 1.11       | -2.42      | -2.07 | -0.94 | -2.67 | -3.05 | -1.72 |       |       |    |
| GENE453X | 16954_at   | 16954_at   | 1     | -0.6  | -1.01 | -0.92 | -0.85 | -1.07 | -1.34 | -  |
|          | 1.29       | -2.6       | -2.33 | -1.31 | -2.99 | -3.51 | -1.86 |       |       |    |
| GENE452X | 18972_at   | 18972_at   | 1     | -0.39 | -0.6  | -1.11 | -0.44 | -0.58 | -1.14 | -  |
|          | 1.1        | -2.22      | -2.16 | -1.08 | -2.59 | -3    | -1.82 |       |       |    |
| GENE451X | 18644_at   | 18644_at   | 1     | -0.39 | -0.92 | -1.06 | -0.49 | -0.85 | -1.04 | -  |
|          | 1.08       | -2.47      | -2.33 | -0.93 | -2.87 | -3.3  | -1.96 |       |       |    |
| GENE450X | 12033_at   | 12033_at   | 1     | -0.15 | -0.72 | -0.93 | -0.51 | -0.89 | -1.02 | -  |
|          | 1.44       | -2.34      | -2.06 | -0.86 | -2.78 | -3.06 | -1.48 |       |       |    |
| GENE449X | 18306_at   | 18306_at   | 1     | -0.81 | -0.76 | -1.29 | -0.83 | -0.9  | -1.26 | -  |
|          | 1.47       | -2.63      | -2.78 | -1.27 | -3.24 | -3.7  | -1.7  |       |       |    |
| GENE448X | 16034_at   | 16034_at   | 1     | -0.65 | -0.83 | -1.47 | -0.73 | -0.88 | -1.77 | -  |
|          | 1.41       | -2.75      | -2.54 | -1.11 | -3.25 | -3.59 | -1.55 |       |       |    |
| GENE138X | 15006_at   | 15006_at   | 1     | -0.72 | -0.7  | -0.84 | -0.91 | -0.62 | -1.46 | -  |
|          | 1.33       | -2.08      | -2.17 | -1.29 | -2.43 | -2.9  | -1.59 |       |       |    |
| GENE137X | 14930_at   | 14930_at   | 1     | -1.14 | -0.86 | -1.55 | -1.11 | -0.76 | -1.65 | -  |
|          | 1.91       | -2.86      | -2.82 | -1.73 | -3.1  | -3.75 | -2.16 |       |       |    |
| GENE136X | 18313_at   | 18313_at   | 1     | -0.94 | -0.93 | -1.16 | -1    | -1.09 | -1.53 | -  |
|          | 1.59       | -3.06      | -2.94 | -1.82 | -3.06 | -3.7  | -1.71 |       |       |    |
| GENE135X | 14600_at   | 14600_at   | 1     | -1.19 | -1.38 | -1.96 | -1.95 | -1.28 | -2.23 | -  |
|          | 2.52       | -4.21      | -4.02 | -2.44 | -4.15 | -4.82 | -2.51 |       |       |    |
| GENE27X  | 14387_g_at | 14387_g_at | 1     | -1.03 | -0.82 | -1.22 | -1.17 | -0.91 | -1.54 | -  |
|          | 2.25       | -3.09      | -2.67 | -1.96 | -3.74 | -3.77 | -2.01 |       |       |    |
| GENE26X  | 20063_at   | 20063_at   | 1     | -1    | -1.06 | -1.4  | -1.07 | -0.73 | -1.35 | -  |
|          | 2.13       | -3.23      | -2.94 | -1.78 | -3.77 | -4.02 | -1.89 |       |       |    |
| GENE31X  | 14124_s_at | 14124_s_at | 1     | -0.82 | -0.63 | -0.9  | -0.91 | -0.61 | -1.33 | -  |
|          | 1.01       | -2.51      | -2.24 | -1.22 | -2.66 | -2.97 | -1.4  |       |       |    |
| GENE30X  | 18994_at   | 18994_at   | 1     | -0.96 | -0.56 | -0.88 | -1.06 | -0.87 | -1.63 | -  |
|          | 1.83       | -3.11      | -2.67 | -1.48 | -3.59 | -4    | -1.87 |       |       |    |
| GENE33X  | 13649_at   | 13649_at   | 1     | -0.38 | -0.59 | -0.73 | -0.45 | -0.77 | -0.94 | -  |
|          | 0.86       | -1.54      | -1.56 | -1.29 | -2.01 | -2.27 | -0.95 |       |       |    |
| GENE113X | 15456_at   | 15456_at   | 1     | -0.96 | -0.64 | -0.95 | -0.54 | -0.6  | -1.4  | -  |
|          | 1.66       | -2.06      | -2    | -1.17 | -2.78 | -2.31 | -1.37 |       |       |    |
| GENE20X  | 16598_s_at | 16598_s_at | 1     | -0.97 | -1    | -1.1  | -0.82 | -1.16 | -2.03 | -  |
|          | 1.84       | -2.41      | -1.98 | -1.6  | -3.04 | -3.06 | -1.91 |       |       |    |
| GENE19X  | 20468_at   | 20468_at   | 1     | -0.9  | -1.14 | -1.59 | -1.28 | -1.4  | -2.47 | -2 |
|          | -3.22      | -2.61      | -2.03 | -3.77 | -3.18 | -1.94 |       |       |       |    |
| GENE23X  | 14867_at   | 14867_at   | 1     | -0.59 | -1.16 | -0.86 | -0.22 | -0.8  | -1.48 | -  |
|          | 1.19       | -2.34      | -1.69 | -1.09 | -2.63 | -2.39 | -1.77 |       |       |    |
| GENE22X  | 19231_at   | 19231_at   | 1     | -0.4  | -1.09 | -1.24 | -0.51 | -1.02 | -1.59 | -  |
|          | 1.18       | -2.49      | -2.15 | -1.15 | -2.99 | -2.34 | -1.41 |       |       |    |
| GENE533X | 18685_at   | 18685_at   | 1     | -0.24 | -0.22 | -0.35 | -0.46 | -0.59 | -0.73 | -  |
|          | 0.54       | -1.25      | -1.23 | -0.71 | -1.79 | -1.66 | -1.65 |       |       |    |
| GENE532X | 12752_s_at | 12752_s_at | 1     | -0.31 | -0.11 | -0.45 | -0.44 | -0.34 | -0.74 | -  |
|          | 0.72       | -1.54      | -1.27 | -0.71 | -1.8  | -1.96 | -1.98 |       |       |    |
| GENE215X | 16494_at   | 16494_at   | 1     | -0.66 | -0.2  | -0.49 | -0.43 | -0.38 | -0.71 | -  |
|          | 0.86       | -1.56      | -2.18 | -0.66 | -2.62 | -2.07 | -2.29 |       |       |    |

|          |            |            |       |          |       |       |       |       |       |   |
|----------|------------|------------|-------|----------|-------|-------|-------|-------|-------|---|
| GENE214X | 12143_at   | 12143_at   | 1     | 0.05     | -0.14 | -0.73 | -0.05 | -0.06 | -0.95 | - |
|          | 0.63       | -1.71      | -1.54 | -0.67    | -1.92 | -1.88 | -1.67 |       |       |   |
| GENE213X | 12604_at   | 12604_at   | 1     | -0.34    | -0.08 | -0.86 | -0.34 | -0.15 | -0.92 | - |
|          | 0.72       | -1.65      | -1.97 | -1.04    | -1.92 | -1.97 | -1.84 |       |       |   |
| GENE212X | 19997_at   | 19997_at   | 1     | -0.35    | -0.19 | -0.84 | -0.62 | -0.31 | -1.08 | - |
|          | 1.06       | -1.98      | -1.94 | -1.09    | -2.15 | -2.11 | -1.95 |       |       |   |
| GENE216X | 20047_at   | 20047_at   | 1     | -0.33    | 0.18  | -0.36 | -0.13 | -0.38 | -0.27 | - |
|          | 0.48       | -1.46      | -1.38 | -0.74    | -2.16 | -1.38 | -1.22 |       |       |   |
| GENE220X | 13382_at   | 13382_at   | 1     | -0.2     | 0     | -0.33 | -0.3  | 0.01  | -0.21 | - |
|          | 0.64       | -1.24      | -0.67 | -0.83    | -1.44 | -1.36 | -1.06 |       |       |   |
| GENE219X | 19008_s_at | 19008_s_at | 1     | -0.87    | -0.82 | -1.11 | -1.21 | -0.23 | -1.37 | - |
|          | 0.89       | -2.85      | -1.63 | -1.83    | -3.55 | -3.02 | -3.05 |       |       |   |
| GENE218X | 18344_at   | 18344_at   | 1     | -0.48    | 0.13  | -0.77 | -0.48 | -0.14 | -0.95 | - |
|          | 0.93       | -1.35      | -0.95 | -1.1     | -1.86 | -1.26 | -1.25 |       |       |   |
| GENE217X | 17254_at   | 17254_at   | 1     | -0.7     | -0.25 | -1.53 | -1.11 | -0.67 | -1.68 | - |
|          | 1.56       | -2.16      | -1.95 | -2.01    | -4.23 | -3.05 | -2.81 |       |       |   |
| GENE539X | 16687_at   | 16687_at   | 1     | -0.00305 |       | -0.25 | -0.32 | -0.13 | -0.49 | - |
|          | 0.4        | -0.28      | -0.69 | -1       | -0.58 | -0.8  | -1.87 | -1.38 |       |   |
| GENE509X | 15465_at   | 15465_at   | 1     | -0.26    | 0.15  | -0.49 | -0.19 | -0.2  | -0.53 | - |
|          | 0.42       | -0.72      | -0.78 | -0.31    | -0.68 | -1.78 | -1.3  |       |       |   |
| GENE508X | 19972_at   | 19972_at   | 1     | 0.02     | 0.27  | -0.53 | -0.2  | -0.17 | -0.37 | - |
|          | 0.29       | -0.7       | -1.04 | -0.31    | -0.92 | -1.55 | -1.28 |       |       |   |
| GENE529X | 15212_s_at | 15212_s_at | 1     | -0.16    | -0.49 | -0.73 | -0.98 | -0.64 | -1.1  | - |
|          | 0.51       | -1.92      | -2.04 | -0.61    | -1.91 | -2.66 | -1.92 |       |       |   |
| GENE528X | 18081_at   | 18081_at   | 1     | -0.31    | -0.44 | -0.59 | -0.44 | -0.44 | -0.72 | - |
|          | 0.9        | -1.72      | -1.87 | -0.87    | -1.96 | -2.51 | -1.95 |       |       |   |
| GENE527X | 12611_g_at | 12611_g_at | 1     | -0.28    | -0.47 | -0.39 | -0.74 | -0.46 | -0.87 | - |
|          | 0.8        | -2.1       | -1.94 | -1.16    | -2    | -3.21 | -2.24 |       |       |   |
| GENE499X | 14730_s_at | 14730_s_at | 1     | -0.24    | -0.08 | -0.37 | -0.14 | -0.37 | -0.66 | - |
|          | 0.23       | -0.71      | -0.99 | -0.27    | -1.08 | -1.78 | -1.14 |       |       |   |
| GENE498X | 12234_at   | 12234_at   | 1     | -0.17    | -0.18 | -0.74 | -0.3  | -0.46 | -0.87 | - |
|          | 0.34       | -1.2       | -1.42 | -0.55    | -1.37 | -2.13 | -1.8  |       |       |   |
| GENE497X | 15035_at   | 15035_at   | 1     | -0.08    | -0.33 | -0.48 | -0.24 | -0.54 | -0.81 | - |
|          | 0.43       | -1.24      | -1.81 | -0.53    | -1.55 | -2.28 | -1.89 |       |       |   |
| GENE496X | 19548_at   | 19548_at   | 1     | -0.34    | -0.62 | -1.06 | -0.63 | -0.63 | -1.49 | - |
|          | 0.88       | -2.32      | -2.79 | -1.24    | -3.99 | -4.68 | -3.88 |       |       |   |
| GENE314X | 18251_at   | 18251_at   | 1     | -0.4     | 0.16  | -0.03 | -0.45 | -0.38 | -0.46 | - |
|          | 0.42       | -0.76      | -0.81 | -0.57    | -0.98 | -1.26 | -1.17 |       |       |   |
| GENE313X | 15146_s_at | 15146_s_at | 1     | -0.75    | -0.01 | -0.32 | -1.06 | -0.69 | -1.68 | - |
|          | 1.2        | -2.06      | -2.13 | -1.27    | -2.67 | -3.32 | -3.4  |       |       |   |
| GENE312X | 20648_at   | 20648_at   | 1     | -0.45    | -0.23 | -0.32 | -0.77 | -0.49 | -0.67 | - |
|          | 0.92       | -1.17      | -1.26 | -1       | -1.82 | -1.91 | -1.6  |       |       |   |
| GENE311X | 14664_i_at | 14664_i_at | 1     | -0.36    | 0.09  | -0.4  | -1    | -0.36 | -0.92 | - |
|          | 0.76       | -1.04      | -1.13 | -1.07    | -1.95 | -2.37 | -1.65 |       |       |   |
| GENE310X | 16508_at   | 16508_at   | 1     | -0.4     | -0.01 | 0.11  | -0.41 | -0.25 | -0.67 | - |
|          | 0.81       | -1.18      | -1.1  | -0.8     | -1.8  | -1.88 | -1.27 |       |       |   |
| GENE309X | 17438_at   | 17438_at   | 1     | -0.44    | -0.05 | -0.21 | -0.41 | -0.35 | -1.05 | - |
|          | 1.06       | -1.53      | -1.54 | -0.77    | -2.09 | -2.24 | -1.71 |       |       |   |
| GENE308X | 19454_at   | 19454_at   | 1     | -0.41    | 0.04  | -0.23 | -0.59 | -0.46 | -1.81 | - |
|          | 1.08       | -2.04      | -1.87 | -1.19    | -2.76 | -2.64 | -2.33 |       |       |   |
| GENE265X | 12387_at   | 12387_at   | 1     | -1.19    | -0.15 | -0.51 | -1.12 | -0.43 | -1.78 | - |
|          | 1.3        | -1.51      | -1.78 | -1.54    | -2.07 | -4.25 | -2.58 |       |       |   |
| GENE264X | 13654_at   | 13654_at   | 1     | -0.53    | -0.33 | -0.92 | -0.45 | -0.65 | -1.58 | - |
|          | 1.05       | -2         | -2.3  | -1.74    | -2.41 | -4.04 | -2.17 |       |       |   |
| GENE263X | 15255_at   | 15255_at   | 1     | -0.7     | -0.22 | -0.75 | -1.11 | -0.39 | -1.84 | - |
|          | 1.64       | -2.05      | -2.95 | -2.15    | -2.7  | -4.27 | -1.53 |       |       |   |

|          |            |            |       |       |       |       |       |       |       |    |
|----------|------------|------------|-------|-------|-------|-------|-------|-------|-------|----|
| GENE262X | 14014_at   | 14014_at   | 1     | -0.82 | -0.33 | -0.66 | -1.37 | -0.48 | -1.74 | -  |
|          | 1.37       | -2.44      | -2.51 | -1.85 | -2.74 | -3.66 | -2.08 |       |       |    |
| GENE534X | 16495_at   | 16495_at   | 1     | -0.34 | -0.76 | -0.34 | -0.14 | -0.77 | -0.41 | -  |
|          | 0.47       | -1.44      | -1.15 | -0.38 | -1.38 | -1.63 | -1.46 |       |       |    |
| GENE464X | 18694_s_at | 18694_s_at | 1     | -0.26 | -0.57 | -0.05 | -0.43 | -0.86 | -0.66 | -  |
|          | 0.67       | -1.33      | -1.12 | -0.6  | -1.79 | -1.97 | -1.35 |       |       |    |
| GENE326X | 20198_at   | 20198_at   | 1     | -0.47 | -0.65 | -0.55 | -0.36 | -0.57 | -0.49 | -  |
|          | 0.96       | -1.22      | -1.25 | -0.44 | -1.45 | -1.25 | -1.22 |       |       |    |
| GENE325X | 11992_at   | 11992_at   | 1     | -0.82 | -0.65 | -0.53 | -0.36 | -0.69 | -0.89 | -  |
|          | 1.24       | -2.04      | -1.47 | -0.56 | -2.15 | -1.89 | -1.85 |       |       |    |
| GENE324X | 15024_at   | 15024_at   | 1     | -0.6  | -0.8  | -0.74 | -0.24 | -0.9  | -0.52 | -  |
|          | 1.19       | -1.93      | -1.43 | -0.6  | -2.58 | -2.04 | -1.64 |       |       |    |
| GENE321X | 16302_at   | 16302_at   | 1     | -0.52 | -1.05 | -0.77 | -0.64 | -0.95 | -0.93 | -  |
|          | 0.96       | -2.44      | -1.39 | -1    | -2.41 | -1.77 | -2.03 |       |       |    |
| GENE320X | 16260_at   | 16260_at   | 1     | -0.43 | -0.46 | -0.65 | -0.28 | -0.66 | -0.56 | -  |
|          | 0.47       | -1.38      | -1.24 | -0.97 | -1.66 | -1.24 | -1.44 |       |       |    |
| GENE319X | 15153_at   | 15153_at   | 1     | -0.62 | -0.93 | -1.36 | -0.77 | -1.32 | -1.17 | -  |
|          | 1.44       | -3.59      | -2.58 | -1.6  | -3.94 | -2.84 | -3.88 |       |       |    |
| GENE323X | 18521_at   | 18521_at   | 1     | -0.41 | -0.5  | -0.64 | -0.46 | -0.61 | -0.65 | -  |
|          | 0.57       | -1.24      | -1.13 | -0.62 | -1.33 | -1.25 | -1.36 |       |       |    |
| GENE322X | 20256_s_at | 20256_s_at | 1     | -0.94 | -0.89 | -0.9  | -0.43 | -1.19 | -1.11 | -  |
|          | 1.13       | -2.33      | -1.74 | -0.84 | -2.35 | -1.91 | -2.5  |       |       |    |
| GENE260X | 15441_at   | 15441_at   | 1     | -0.44 | -0.59 | -0.46 | -0.33 | -0.71 | -0.63 | -  |
|          | 0.66       | -1.36      | -1.23 | -0.76 | -1.45 | -1.59 | -1.73 |       |       |    |
| GENE259X | 14482_at   | 14482_at   | 1     | -0.58 | -0.55 | -0.46 | -0.49 | -0.53 | -0.68 | -  |
|          | 0.93       | -1.34      | -1.15 | -0.71 | -1.63 | -1.52 | -1.78 |       |       |    |
| GENE330X | 16452_g_at | 16452_g_at | 1     | -0.39 | -0.43 | -0.53 | -0.41 | -0.44 | -0.3  | -  |
|          | 0.67       | -1.21      | -1.26 | -0.75 | -1.45 | -1.29 | -1.12 |       |       |    |
| GENE329X | 13151_g_at | 13151_g_at | 1     | -0.37 | -1.07 | -0.99 | -0.75 | -0.87 | -0.72 | -  |
|          | 0.88       | -2.19      | -2.12 | -1.49 | -2.29 | -2.24 | -2.02 |       |       |    |
| GENE328X | 16451_at   | 16451_at   | 1     | -0.09 | -0.48 | -0.5  | -0.56 | -0.33 | -0.66 | -  |
|          | 0.59       | -1.15      | -1.29 | -0.56 | -1.59 | -1.4  | -1.11 |       |       |    |
| GENE327X | 12137_at   | 12137_at   | 1     | -0.24 | -0.58 | -0.52 | -0.66 | -0.76 | -0.81 | -  |
|          | 0.92       | -2         | -1.74 | -1.1  | -2.25 | -2.31 | -1.7  |       |       |    |
| GENE40X  | 19452_at   | 19452_at   | 1     | -0.25 | -0.64 | -0.51 | -0.32 | -0.32 | -0.65 | -  |
|          | 0.62       | -0.87      | -1.11 | -0.62 | -1.54 | -1.17 | -1.12 |       |       |    |
| GENE340X | 15411_at   | 15411_at   | 1     | -0.32 | -0.27 | -0.1  | -0.34 | -0.38 | -0.14 | -  |
|          | 0.58       | -1.13      | -0.81 | -0.74 | -1.23 | -1.16 | -1.55 |       |       |    |
| GENE339X | 13007_at   | 13007_at   | 1     | -0.24 | -0.23 | -0.16 | -0.21 | -0.22 | -0.28 | -  |
|          | 0.61       | -0.85      | -0.93 | -0.62 | -0.99 | -1.2  | -1.01 |       |       |    |
| GENE338X | 17048_s_at | 17048_s_at | 1     | -0.46 | -0.25 | -0.14 | -0.36 | -0.37 | -0.43 | -  |
|          | 0.75       | -1.15      | -1.08 | -0.61 | -1.42 | -1.51 | -1.44 |       |       |    |
| GENE337X | 12485_at   | 12485_at   | 1     | -0.29 | -0.29 | -0.25 | -0.56 | -0.41 | -0.32 | -  |
|          | 0.7        | -1.52      | -1.16 | -1    | -1.41 | -1.87 | -1.44 |       |       |    |
| GENE334X | 14402_at   | 14402_at   | 1     | -1.03 | -1.03 | -0.19 | -0.28 | -0.44 | -0.91 | -  |
|          | 1.19       | -1.79      | -1.41 | -1.19 | -2.9  | -2.67 | -2.22 |       |       |    |
| GENE333X | 17555_s_at | 17555_s_at | 1     | -1.07 | -0.77 | -0.76 | -1.39 | -1.1  | -2.12 | -  |
|          | 2.66       | -2.79      | -1.76 | -2.16 | -4.29 | -3.6  | -3.55 |       |       |    |
| GENE299X | 15771_at   | 15771_at   | 1     | -0.31 | -0.01 | -0.08 | -0.37 | -0.27 | -0.53 | -  |
|          | 0.79       | -0.9       | -0.72 | -0.75 | -0.98 | -1.24 | -1.1  |       |       |    |
| GENE252X | 14478_at   | 14478_at   | 1     | -0.29 | -0.31 | -0.48 | -0.45 | -0.08 | -0.51 | -  |
|          | 0.87       | -0.94      | -0.85 | -0.94 | -1.15 | -1.11 | -1.45 |       |       |    |
| GENE251X | 15344_at   | 15344_at   | 1     | -0.33 | -0.5  | -0.33 | -0.41 | -0.26 | -0.7  | -1 |
|          | -0.84      | -0.87      | -0.77 | -1.17 | -1.13 | -1.38 |       |       |       |    |
| GENE317X | 16416_at   | 16416_at   | 1     | -0.23 | -0.58 | -0.77 | -0.32 | -0.68 | -1.03 | -  |
|          | 0.67       | -1.57      | -1.28 | -0.65 | -2.32 | -1.69 | -1.63 |       |       |    |

|          |            |            |       |       |       |       |       |       |       |   |
|----------|------------|------------|-------|-------|-------|-------|-------|-------|-------|---|
| GENE316X | 12243_at   | 12243_at   | 1     | -0.66 | -0.8  | -1.22 | -0.48 | -0.83 | -1.34 | - |
|          | 1.32       | -2.9       | -1.9  | -0.95 | -3.9  | -2.8  | -2.27 |       |       |   |
| GENE315X | 12313_g_at | 12313_g_at | 1     | -0.39 | -0.76 | -1.95 | -0.71 | -1.04 | -1.12 | - |
|          | 0.9        | -2.83      | -2.35 | -1.34 | -3.62 | -2.79 | -2.13 |       |       |   |
| GENE902X | 13011_at   | 13011_at   | 1     | -0.59 | -0.41 | -1.13 | -0.5  | -0.62 | -1.27 | - |
|          | 1.32       | -3         | -1.64 | -1.37 | -3.32 | -2.46 | -2.1  |       |       |   |
| GENE37X  | 13798_at   | 13798_at   | 1     | -0.77 | -0.66 | -1.23 | -0.59 | -1.03 | -1.72 | - |
|          | 1.49       | -3.07      | -2.58 | -1.77 | -4.07 | -2.72 | -2.13 |       |       |   |
| GENE39X  | 18047_at   | 18047_at   | 1     | -0.26 | -0.34 | -0.56 | -0.27 | -0.33 | -0.55 | - |
|          | 0.66       | -1.13      | -0.99 | -0.51 | -1.4  | -1.21 | -1.02 |       |       |   |
| GENE38X  | 15373_g_at | 15373_g_at | 1     | -0.67 | -0.53 | -1.03 | -0.48 | -0.46 | -1.09 | - |
|          | 1.24       | -2.22      | -1.82 | -1.46 | -2.53 | -2.28 | -1.89 |       |       |   |
| GENE237X | 12253_g_at | 12253_g_at | 1     | -0.45 | -0.63 | -0.93 | -0.28 | -0.78 | -0.9  | - |
|          | 0.9        | -1.7       | -1.31 | -0.87 | -1.75 | -1.39 | -1.49 |       |       |   |
| GENE236X | 16385_s_at | 16385_s_at | 1     | -1.03 | -0.71 | -1.82 | -0.7  | -0.97 | -1.86 | - |
|          | 1.79       | -2.91      | -2.35 | -1.76 | -2.91 | -2.86 | -2.6  |       |       |   |
| GENE235X | 15369_at   | 15369_at   | 1     | -0.63 | -0.82 | -1.59 | -0.75 | -1.01 | -1.52 | - |
|          | 1.59       | -2.53      | -2.61 | -1.24 | -2.71 | -2.38 | -2.05 |       |       |   |
| GENE234X | 20467_at   | 20467_at   | 1     | -0.93 | -0.98 | -1.63 | -0.67 | -0.92 | -1.59 | - |
|          | 1.69       | -2.62      | -2.39 | -1.07 | -2.81 | -2.73 | -2.3  |       |       |   |
| GENE239X | 14421_at   | 14421_at   | 1     | -0.46 | -0.23 | -1.07 | -0.64 | -0.76 | -1.39 | - |
|          | 1.18       | -1.92      | -1.53 | -0.83 | -2.4  | -1.3  | -1.84 |       |       |   |
| GENE233X | 17576_at   | 17576_at   | 1     | -0.96 | -0.88 | -1.88 | -1.09 | -1.33 | -2.29 | - |
|          | 1.68       | -2.56      | -2.29 | -1.31 | -3.14 | -2.29 | -2.31 |       |       |   |
| GENE232X | 17577_g_at | 17577_g_at | 1     | -0.86 | -0.78 | -1.72 | -1.07 | -1.28 | -2.72 | - |
|          | 1.64       | -2.5       | -2.58 | -1.38 | -3.62 | -3.04 | -2.57 |       |       |   |
| GENE231X | 14018_at   | 14018_at   | 1     | -1.23 | -1.17 | -1.89 | -1.04 | -1.39 | -2.02 | - |
|          | 1.74       | -3.17      | -2.37 | -1.26 | -4.08 | -2.92 | -2.59 |       |       |   |
| GENE170X | 17427_at   | 17427_at   | 1     | -0.49 | -0.31 | -0.71 | -0.6  | -0.29 | -1.12 | - |
|          | 0.83       | -1.41      | -1.1  | -0.64 | -1.29 | -1.58 | -1.2  |       |       |   |
| GENE169X | 14531_at   | 14531_at   | 1     | -0.51 | -0.15 | -1.18 | -0.59 | -0.45 | -1.28 | - |
|          | 0.87       | -1.89      | -1.39 | -0.82 | -1.95 | -2.12 | -2.01 |       |       |   |
| GENE168X | 18025_at   | 18025_at   | 1     | -0.79 | -0.46 | -1.4  | -0.98 | -0.67 | -1.71 | - |
|          | 1.28       | -2.04      | -1.95 | -1.33 | -2.45 | -2.56 | -2.61 |       |       |   |
| GENE167X | 13085_i_at | 13085_i_at | 1     | -1.37 | -0.3  | -1.89 | -1.17 | -0.8  | -2.06 | - |
|          | 1.09       | -3.08      | -2.15 | -0.9  | -2.76 | -3.06 | -2.64 |       |       |   |
| GENE166X | 14914_at   | 14914_at   | 1     | -0.39 | -0.42 | -0.88 | -0.33 | -0.67 | -0.96 | - |
|          | 0.94       | -1.45      | -1.34 | -0.83 | -1.52 | -2.18 | -1.68 |       |       |   |
| GENE165X | 18009_s_at | 18009_s_at | 1     | -0.42 | -0.59 | -1.01 | -0.56 | -0.82 | -1.32 | - |
|          | 0.84       | -1.46      | -1.7  | -0.6  | -1.78 | -2.23 | -2.14 |       |       |   |
| GENE164X | 16480_at   | 16480_at   | 1     | -0.8  | -0.73 | -1.4  | -0.83 | -0.91 | -1.37 | - |
|          | 1.01       | -1.94      | -2.03 | -0.96 | -2.04 | -2.51 | -2.29 |       |       |   |
| GENE163X | 14820_g_at | 14820_g_at | 1     | -1.11 | -0.16 | -2.07 | -0.96 | -0.44 | -2.07 | - |
|          | 1.34       | -1.9       | -2.65 | -1.44 | -3.17 | -3.65 | -3.32 |       |       |   |
| GENE162X | 17560_s_at | 17560_s_at | 1     | -1    | -0.46 | -2.65 | -0.94 | -0.82 | -2.26 | - |
|          | 1.12       | -2.85      | -2.87 | -1.8  | -3.6  | -4.19 | -3.05 |       |       |   |
| GENE254X | 13438_at   | 13438_at   | 1     | -0.76 | -0.69 | -1.45 | -1.04 | -0.51 | -0.99 | - |
|          | 1.17       | -2.07      | -1.93 | -1.33 | -2.43 | -2.32 | -2.99 |       |       |   |
| GENE253X | 12348_at   | 12348_at   | 1     | -1.11 | -0.7  | -1.7  | -1.76 | -0.8  | -1.61 | - |
|          | 1.76       | -2.95      | -2.61 | -2.03 | -2.95 | -2.44 | -3.89 |       |       |   |
| GENE255X | 14480_at   | 14480_at   | 1     | -0.81 | -0.38 | -0.84 | -1.06 | -0.49 | -0.84 | - |
|          | 1.48       | -1.25      | -2.17 | -1.2  | -1.97 | -1.9  | -2.28 |       |       |   |
| GENE249X | 13954_g_at | 13954_g_at | 1     | -1    | -0.24 | -1.11 | -2    | -0.63 | -1.21 | - |
|          | 1.76       | -1.92      | -2.43 | -2.2  | -3.44 | -2.43 | -3.1  |       |       |   |
| GENE250X | 14665_r_at | 14665_r_at | 1     | -0.45 | -0.03 | -0.51 | -1.09 | -0.66 | -1.32 | - |
|          | 0.86       | -1.31      | -1.19 | -1.09 | -1.71 | -1.73 | -2.02 |       |       |   |

|           |            |            |       |       |       |       |       |       |       |   |
|-----------|------------|------------|-------|-------|-------|-------|-------|-------|-------|---|
| GENE248X  | 16613_s_at | 16613_s_at | 1     | -1.19 | -0.98 | -1.94 | -3.19 | -1.36 | -2.17 | - |
|           | 2.45       | -2.94      | -2.94 | -2.19 | -3.94 | -3.43 | -3.45 |       |       |   |
| GENE230X  | 19466_s_at | 19466_s_at | 1     | -1.46 | -1.04 | -1.49 | -1.58 | -1.16 | -2.18 | - |
|           | 1.81       | -2.61      | -2.33 | -1.24 | -3.05 | -2.79 | -3.11 |       |       |   |
| GENE229X  | 20452_s_at | 20452_s_at | 1     | -1.19 | -1.17 | -1.47 | -1.19 | -1.43 | -2.32 | - |
|           | 1.67       | -2.58      | -2.32 | -2.15 | -3.17 | -2.32 | -3.24 |       |       |   |
| GENE129X  | 14021_r_at | 14021_r_at | 1     | -1.39 | -0.71 | -1.13 | -1.28 | -0.71 | -1.35 | - |
|           | 1.49       | -2.15      | -2.46 | -1.59 | -2.4  | -2.5  | -2.25 |       |       |   |
| GENE128X  | 15685_s_at | 15685_s_at | 1     | -1.3  | -0.77 | -1.9  | -1.34 | -0.82 | -2.24 | - |
|           | 2.28       | -2.63      | -3.49 | -1.92 | -3.22 | -3.17 | -3.03 |       |       |   |
| GENE127X  | 14312_at   | 14312_at   | 1     | -1.26 | -1.18 | -2.15 | -1.7  | -0.86 | -2.33 | - |
|           | 2.43       | -2.8       | -3.62 | -2.11 | -3.7  | -3.09 | -2.92 |       |       |   |
| GENE1095X | 16184_at   | 16184_at   | 1     | -0.45 | -1.46 | -0.36 | -0.9  | -1.21 | -1.18 | - |
|           | 0.6        | -0.63      | -0.3  | -1.04 | -1.53 | -1.3  | -1.67 |       |       |   |
| GENE1091X | 13569_at   | 13569_at   | 1     | -1.07 | -1.08 | -1.41 | -0.93 | -0.71 | -1.19 | - |
|           | 0.74       | -1.35      | -0.09 | -0.63 | -1.97 | -0.29 | -2.73 |       |       |   |
| GENE1108X | 18942_at   | 18942_at   | 1     | -0.42 | -0.02 | -0.1  | 0.11  | -0.46 | -1.02 | - |
|           | 0.63       | -0.5       | -0.22 | -0.77 | -1.21 | -0.61 | -1.42 |       |       |   |
| GENE1110X | 12280_g_at | 12280_g_at | 1     | -0.37 | -0.16 | -0.14 | -0.14 | -0.34 | -0.26 | - |
|           | 0.55       | -0.46      | -0.16 | -0.32 | -0.59 | -0.24 | -1.09 |       |       |   |
| GENE1109X | 18285_at   | 18285_at   | 1     | -0.27 | -0.13 | 0.01  | -0.28 | -0.23 | -0.28 | - |
|           | 0.42       | -0.36      | -0.2  | -0.59 | -0.63 | -0.37 | -1.05 |       |       |   |
| GENE1094X | 17447_at   | 17447_at   | 1     | -0.64 | -0.51 | -0.59 | -0.58 | -0.74 | -0.87 | - |
|           | 0.96       | -0.92      | -0.59 | -0.61 | -1.11 | -1.08 | -1.72 |       |       |   |
| GENE1093X | 16529_at   | 16529_at   | 1     | -0.44 | -0.95 | -0.63 | -0.69 | -0.85 | -0.81 | - |
|           | 0.8        | -1.22      | -0.78 | -1.21 | -1.59 | -1.01 | -2.36 |       |       |   |
| GENE1102X | 16490_at   | 16490_at   | 1     | -0.18 | -0.05 | -0.36 | -0.28 | -0.75 | -0.87 | - |
|           | 0.96       | -0.75      | -0.6  | -0.27 | -0.95 | -0.88 | -1.94 |       |       |   |
| GENE550X  | 15505_at   | 15505_at   | 1     | 0.12  | -0.11 | -0.47 | -0.09 | -0.6  | -0.45 | - |
|           | 0.43       | -0.51      | -0.39 | -0.34 | -0.81 | -0.84 | -1.02 |       |       |   |
| GENE986X  | 13927_at   | 13927_at   | 1     | -0.35 | -0.52 | 0.32  | -0.59 | -1    | 0.11  | - |
|           | 0.79       | -1.34      | -0.06 | -0.63 | -1.66 | -0.77 | -1.49 |       |       |   |
| GENE960X  | 19438_at   | 19438_at   | 1     | -0.24 | -0.38 | -0.07 | -0.19 | -0.64 | -0.17 | - |
|           | 0.59       | -1.06      | -0.41 | -0.45 | -1.07 | -0.63 | -0.65 |       |       |   |
| GENE959X  | 19660_at   | 19660_at   | 1     | -0.7  | -1.57 | -0.73 | -0.74 | -2.34 | -1.32 | - |
|           | 1.58       | -4.2       | -1.32 | -1.44 | -4.66 | -2.58 | -3.02 |       |       |   |
| GENE958X  | 14080_at   | 14080_at   | 1     | -0.69 | -0.54 | -0.54 | -0.57 | -1.29 | -0.83 | - |
|           | 1.23       | -1.99      | -0.93 | -1.09 | -2.64 | -1.52 | -1.29 |       |       |   |
| GENE957X  | 14009_at   | 14009_at   | 1     | -0.94 | -1.28 | 0     | -0.26 | -0.81 | -0.43 | - |
|           | 1.58       | -2.86      | -1.36 | -1.33 | -2.86 | -1.49 | -1.63 |       |       |   |
| GENE956X  | 17599_s_at | 17599_s_at | 1     | -0.7  | -0.58 | -0.08 | -1.08 | -0.73 | -0.5  | - |
|           | 0.88       | -2.49      | -1.08 | -0.77 | -2.49 | -1.28 | -1.48 |       |       |   |
| GENE955X  | 14534_s_at | 14534_s_at | 1     | -0.66 | -0.41 | -0.39 | -0.86 | -0.73 | -0.68 | - |
|           | 1.3        | -2.2       | -0.78 | -1.48 | -2.55 | -1.16 | -1.96 |       |       |   |
| GENE954X  | 15407_at   | 15407_at   | 1     | -0.4  | -0.41 | -0.25 | -0.68 | -0.47 | -0.32 | - |
|           | 0.96       | -1.72      | -0.94 | -1.2  | -2.62 | -0.94 | -1.48 |       |       |   |
| GENE953X  | 15761_at   | 15761_at   | 1     | -1.08 | -0.62 | -0.32 | -1.35 | -1.18 | -1.58 | - |
|           | 2.36       | -3.5       | -0.58 | -2.02 | -4.18 | -1.58 | -2.09 |       |       |   |
| GENE977X  | 18573_at   | 18573_at   | 1     | -0.23 | -0.58 | -0.31 | -0.09 | -0.47 | -0.14 | - |
|           | 0.28       | -1.1       | -0.8  | -0.55 | -0.96 | -0.74 | -0.94 |       |       |   |
| GENE973X  | 12141_s_at | 12141_s_at | 1     | -0.3  | -1.01 | -0.61 | -0.15 | -0.65 | -0.33 | - |
|           | 0.57       | -1.18      | -0.77 | -0.41 | -1.33 | -0.65 | -1.49 |       |       |   |
| GENE972X  | 17067_s_at | 17067_s_at | 1     | -0.11 | -0.68 | -0.66 | -0.34 | -0.58 | -0.25 | - |
|           | 0.36       | -1.19      | -0.68 | -0.5  | -1.36 | -0.73 | -1.42 |       |       |   |
| GENE971X  | 18029_g_at | 18029_g_at | 1     | -0.36 | -0.83 | -0.7  | -0.16 | -1.32 | -0.58 | - |
|           | 0.61       | -1.23      | -0.58 | -0.58 | -1.41 | -0.87 | -1.74 |       |       |   |

|           |            |            |       |       |       |       |       |       |       |    |
|-----------|------------|------------|-------|-------|-------|-------|-------|-------|-------|----|
| GENE970X  | 12608_i_at | 12608_i_at | 1     | -0.17 | -1.71 | -1.13 | -0.47 | -2    | -1.13 | -  |
|           | 1.34       | -2.84      | -1.13 | -1.23 | -2.84 | -1.13 | -2.8  |       |       |    |
| GENE600X  | 13948_at   | 13948_at   | 1     | -0.3  | -0.42 | 0.03  | -0.38 | -0.39 | -0.12 | -  |
|           | 0.55       | -0.72      | -0.51 | -0.49 | -0.65 | -0.51 | -1.1  |       |       |    |
| GENE336X  | 15858_at   | 15858_at   | 1     | -0.38 | -0.84 | -0.36 | -0.81 | -0.72 | -0.36 | -  |
|           | 0.81       | -1.42      | -1.25 | -1.2  | -1.61 | -1.49 | -1.86 |       |       |    |
| GENE335X  | 12782_r_at | 12782_r_at | 1     | -0.43 | -0.94 | -0.1  | -0.8  | -0.77 | -0.5  | -  |
|           | 0.85       | -1.66      | -0.9  | -1.06 | -1.96 | -1.68 | -1.64 |       |       |    |
| GENE572X  | 19091_at   | 19091_at   | 1     | -0.55 | -0.32 | 0.06  | -0.2  | -0.6  | -0.04 | -  |
|           | 1.06       | -0.71      | -0.38 | -0.3  | -0.67 | -0.6  | -0.93 |       |       |    |
| GENE571X  | 12095_at   | 12095_at   | 1     | -2.08 | -1.79 | -1.15 | -0.32 | -1.53 | 0.04  | -  |
|           | 2.32       | -2.58      | -0.77 | -1.4  | -2.17 | -0.15 | -1.82 |       |       |    |
| GENE569X  | 15943_at   | 15943_at   | 1     | -2    | -1.42 | -1.45 | -0.15 | -1.42 | -0.37 | -2 |
|           | -3.1       | -2.13      | 0.2   | -2.61 | -2.13 | -3.25 |       |       |       |    |
| GENE568X  | 14899_at   | 14899_at   | 1     | -0.81 | -1    | -0.9  | -0.62 | -1.02 | -0.14 | -  |
|           | 1.07       | -0.87      | -1.13 | -0.55 | -0.77 | -1.13 | -1.18 |       |       |    |
| GENE567X  | 14119_r_at | 14119_r_at | 1     | -0.23 | -1    | -0.94 | -0.62 | -0.7  | -0.25 | -1 |
|           | -1.37      | -1.18      | -0.73 | -0.89 | -0.73 | -1.84 |       |       |       |    |
| GENE566X  | 17549_at   | 17549_at   | 1     | -0.77 | -1.38 | -1.83 | -0.57 | -0.5  | -1.64 | -  |
|           | 3.53       | -2.76      | -1.05 | -0.77 | -1.38 | -2.32 | -3.4  |       |       |    |
| GENE1002X | 13907_at   | 13907_at   | 1     | -0.09 | -0.75 | 0.05  | -0.4  | 0.07  | -0.28 | -  |
|           | 0.51       | -0.51      | -0.8  | -0.59 | -1.17 | -0.7  | -0.47 |       |       |    |
| GENE1056X | 16894_at   | 16894_at   | 1     | -0.53 | -0.68 | -0.31 | -0.35 | -0.52 | 0.05  | -  |
|           | 0.73       | -1.19      | -0.69 | -0.7  | -1.24 | -0.58 | -0.24 |       |       |    |
| GENE952X  | 17610_at   | 17610_at   | 1     | -0.53 | -1.14 | -0.34 | -1.05 | -1.97 | -0.8  | -  |
|           | 1.05       | -3.35      | -1.63 | -2.53 | -3.08 | -1.48 | -1    |       |       |    |
| GENE981X  | 15909_at   | 15909_at   | 1     | 0.02  | -0.55 | 0.11  | 0.03  | -0.51 | 0.24  | -  |
|           | 0.45       | -1.35      | -0.73 | -0.54 | -1.65 | -0.98 | -0.59 |       |       |    |
| GENE980X  | 20290_s_at | 20290_s_at | 1     | -0.23 | -0.69 | 0.52  | -0.28 | -0.69 | -0.02 | -  |
|           | 0.88       | -1.56      | -0.66 | -0.62 | -1.69 | -1.43 | -0.58 |       |       |    |
| GENE945X  | 18040_s_at | 18040_s_at | 1     | -0.08 | -0.35 | -0.61 | 0.08  | -0.53 | -0.4  | -  |
|           | 0.45       | -0.82      | -0.66 | 0.02  | -1.97 | -0.61 | -0.77 |       |       |    |
| GENE944X  | 19906_at   | 19906_at   | 1     | -0.39 | -0.55 | -0.85 | -0.45 | -0.79 | -0.96 | -  |
|           | 0.67       | -1.42      | -0.4  | -0.04 | -2.82 | -1.2  | -0.55 |       |       |    |
| GENE943X  | 14990_at   | 14990_at   | 1     | -0.56 | -1.39 | -1    | -0.52 | -1.1  | -1.1  | -  |
|           | 1.42       | -2.27      | -0.8  | -0.83 | -3.53 | -0.48 | -1.59 |       |       |    |
| GENE948X  | 14118_i_at | 14118_i_at | 1     | -0.11 | -1.62 | -0.92 | 0.16  | -1.42 | -0.7  | -  |
|           | 0.21       | -1.81      | -1.58 | -0.05 | -2.35 | -1.07 | -1.31 |       |       |    |
| GENE947X  | 14063_at   | 14063_at   | 1     | -0.07 | -0.98 | -0.66 | -0.52 | -1.07 | -0.8  | -  |
|           | 0.47       | -1.63      | -0.97 | -0.59 | -1.94 | -1.14 | -1.27 |       |       |    |
| GENE946X  | 13622_i_at | 13622_i_at | 1     | -0.17 | -1.58 | -0.79 | -0.53 | -1.71 | -0.65 | -  |
|           | 0.7        | -2.58      | -0.95 | -0.17 | -2.84 | -1.58 | -1.43 |       |       |    |
| GENE951X  | 14578_s_at | 14578_s_at | 1     | -0.11 | -0.62 | -0.57 | 0     | -0.62 | -0.72 | -  |
|           | 0.14       | -1.27      | -0.84 | -0.86 | -1.46 | -0.88 | -0.79 |       |       |    |
| GENE950X  | 19961_at   | 19961_at   | 1     | -0.01 | -0.49 | -0.57 | 0.01  | -0.4  | -0.31 | -  |
|           | 0.22       | -0.75      | -0.5  | -0.48 | -1.26 | -0.75 | -0.99 |       |       |    |
| GENE949X  | 13254_at   | 13254_at   | 1     | -0.12 | -0.81 | -1.08 | -0.22 | -0.84 | -0.6  | -  |
|           | 0.34       | -1.68      | -1.31 | -0.67 | -1.87 | -1.37 | -1.62 |       |       |    |
| GENE318X  | 15510_r_at | 15510_r_at | 1     | 0.15  | -0.69 | -0.69 | -0.23 | -0.9  | -0.72 | -  |
|           | 0.71       | -1.4       | -1.18 | -0.76 | -2.1  | -1.59 | -1.37 |       |       |    |
| GENE935X  | 16564_s_at | 16564_s_at | 1     | -0.23 | -0.39 | -0.55 | -0.25 | -0.46 | -0.36 | -  |
|           | 0.23       | -0.46      | -0.66 | -0.23 | -1.16 | -1.03 | -0.25 |       |       |    |
| GENE934X  | 19734_at   | 19734_at   | 1     | -0.68 | -0.84 | -0.67 | -0.77 | -0.43 | -1.21 | -  |
|           | 0.77       | -1.45      | -1.06 | -0.83 | -2.29 | -2    | -0.23 |       |       |    |
| GENE926X  | 17564_s_at | 17564_s_at | 1     | -0.54 | -0.92 | -0.57 | -0.32 | -0.9  | -0.3  | -  |
|           | 1.09       | -1.5       | -1.38 | -0.54 | -2.03 | -1.7  | 0.01  |       |       |    |

|          |            |            |       |       |       |       |       |       |       |   |
|----------|------------|------------|-------|-------|-------|-------|-------|-------|-------|---|
| GENE925X | 16172_at   | 16172_at   | 1     | -0.78 | -0.65 | -0.62 | -0.47 | -0.73 | -0.18 | - |
|          | 1.56       | -1.81      | -1.76 | -0.72 | -2.45 | -1.76 | -0.45 |       |       |   |
| GENE933X | 15163_s_at | 15163_s_at | 1     | -0.16 | -0.44 | -0.27 | -0.1  | -0.66 | -0.44 | - |
|          | 0.42       | -0.88      | -0.73 | -0.39 | -1.01 | -0.95 | -0.45 |       |       |   |
| GENE932X | 12813_at   | 12813_at   | 1     | -0.29 | -0.5  | -0.44 | -0.36 | -0.67 | -0.42 | - |
|          | 0.65       | -1.09      | -1.12 | -0.51 | -1.2  | -1.25 | -0.5  |       |       |   |
| GENE931X | 13876_at   | 13876_at   | 1     | -1.07 | -1.05 | -1.42 | -0.79 | -1.7  | -1.1  | - |
|          | 1.32       | -3.37      | -2.42 | -0.92 | -3.11 | -3.1  | -0.75 |       |       |   |
| GENE930X | 17112_s_at | 17112_s_at | 1     | -0.27 | -0.49 | -0.39 | -0.44 | -0.47 | -0.73 | - |
|          | 0.72       | -1.35      | -0.85 | -0.64 | -1.32 | -1.06 | -0.7  |       |       |   |
| GENE929X | 15862_at   | 15862_at   | 1     | -0.49 | -0.84 | -0.7  | -0.72 | -0.67 | -0.82 | - |
|          | 1.24       | -2.07      | -1.34 | -1.29 | -2.08 | -1.81 | -0.86 |       |       |   |
| GENE928X | 14430_g_at | 14430_g_at | 1     | -0.62 | -1.19 | -0.81 | -0.67 | -1.28 | -0.6  | - |
|          | 1.42       | -3.14      | -1.79 | -1.14 | -2.76 | -2.4  | -1.48 |       |       |   |
| GENE927X | 15045_at   | 15045_at   | 1     | -0.73 | -1.68 | -1.86 | -0.83 | -2.08 | -1.1  | - |
|          | 1.76       | -3.02      | -1.86 | -1.28 | -3.72 | -2.64 | -1.78 |       |       |   |
| GENE447X | 18690_at   | 18690_at   | 1     | -0.59 | -1.01 | -0.67 | -0.44 | -0.89 | -0.45 | - |
|          | 0.98       | -1.89      | -1.52 | -0.88 | -2.38 | -3.08 | -1.24 |       |       |   |
| GENE462X | 15087_at   | 15087_at   | 1     | -0.4  | -0.65 | -0.65 | -0.64 | -0.62 | -0.67 | - |
|          | 0.78       | -1.81      | -1.81 | -0.57 | -1.79 | -2.25 | -0.89 |       |       |   |
| GENE461X | 16479_s_at | 16479_s_at | 1     | -0.62 | -0.92 | -0.92 | -0.72 | -0.73 | -0.94 | - |
|          | 1.18       | -2.45      | -2.71 | -1.04 | -2.56 | -3.01 | -1.34 |       |       |   |
| GENE460X | 16443_at   | 16443_at   | 1     | -0.4  | -0.81 | -0.77 | -0.46 | -0.82 | -0.84 | - |
|          | 0.73       | -2.02      | -1.91 | -0.69 | -2.13 | -2.47 | -1.19 |       |       |   |
| GENE459X | 12785_at   | 12785_at   | 1     | -0.39 | -1.16 | -1.23 | -0.79 | -1.08 | -1.33 | - |
|          | 0.92       | -2.81      | -2.68 | -1.02 | -2.74 | -3.34 | -1.92 |       |       |   |
| GENE458X | 13142_at   | 13142_at   | 1     | -0.42 | -0.85 | -0.69 | -0.45 | -0.79 | -0.64 | - |
|          | 0.75       | -1.91      | -1.7  | -0.61 | -2.08 | -2    | -0.97 |       |       |   |
| GENE457X | 17565_s_at | 17565_s_at | 1     | -0.79 | -1.21 | -1.29 | -0.45 | -1.22 | -1.03 | - |
|          | 1.5        | -2.51      | -2.53 | -0.8  | -3.04 | -2.87 | -1.74 |       |       |   |
| GENE456X | 12236_at   | 12236_at   | 1     | -1.08 | -1.34 | -0.93 | -0.95 | -1.21 | -1.25 | - |
|          | 1.56       | -2.96      | -2.63 | -0.66 | -2.9  | -3.25 | -2.01 |       |       |   |
| GENE29X  | 13953_at   | 13953_at   | 1     | -0.7  | -1.08 | -0.87 | -0.99 | -0.84 | -1.13 | - |
|          | 1.3        | -2.32      | -1.85 | -1.38 | -2.82 | -2.78 | -1.68 |       |       |   |
| GENE28X  | 19545_at   | 19545_at   | 1     | -0.97 | -1.11 | -1.09 | -1.11 | -0.99 | -1.31 | - |
|          | 1.72       | -2.85      | -2.28 | -1.5  | -3.09 | -3.35 | -1.76 |       |       |   |
| GENE25X  | 14540_at   | 14540_at   | 1     | -0.53 | -1.02 | -0.86 | -1    | -1.18 | -1.05 | - |
|          | 1.33       | -2.8       | -2.49 | -1.53 | -3.28 | -3.29 | -1.52 |       |       |   |
| GENE24X  | 18439_s_at | 18439_s_at | 1     | -0.65 | -0.99 | -1.06 | -1.11 | -1.17 | -1.44 | - |
|          | 1.37       | -3.54      | -2.32 | -1.48 | -3.65 | -3.19 | -1.78 |       |       |   |
| GENE21X  | 15832_at   | 15832_at   | 1     | -0.89 | -1.15 | -1.5  | -0.79 | -1.4  | -1.7  | - |
|          | 1.19       | -3.25      | -2.79 | -1.28 | -3.51 | -3.33 | -2.11 |       |       |   |
| GENE17X  | 13678_at   | 13678_at   | 1     | -1.09 | -1.34 | -2.13 | -1.46 | -1.59 | -2.41 | - |
|          | 1.86       | -3.72      | -3.3  | -1.99 | -4.24 | -4.51 | -2.82 |       |       |   |
| GENE463X | 19900_at   | 19900_at   | 1     | -0.32 | -0.56 | -0.04 | -0.6  | -1.09 | -0.82 | - |
|          | 1.35       | -1.74      | -2.14 | -1    | -1.97 | -2.5  | -1.05 |       |       |   |
| GENE332X | 16102_s_at | 16102_s_at | 1     | -0.23 | -0.27 | -0.16 | -0.31 | -0.45 | -0.19 | - |
|          | 0.54       | -0.88      | -0.84 | -0.57 | -1.14 | -0.91 | -0.78 |       |       |   |
| GENE331X | 13209_s_at | 13209_s_at | 1     | -0.26 | -0.97 | -0.31 | -0.94 | -1.36 | -0.88 | - |
|          | 1.19       | -2.72      | -2.6  | -1.34 | -2.8  | -2.12 | -1.79 |       |       |   |
| GENE292X | 13262_s_at | 13262_s_at | 1     | -0.6  | -0.36 | 0.07  | -0.98 | -0.99 | -0.91 | - |
|          | 0.77       | -1.2       | -1    | -0.94 | -1.52 | -1.4  | -0.78 |       |       |   |
| GENE969X | 13910_at   | 13910_at   | 1     | -0.69 | -0.73 | -0.35 | -0.5  | -0.77 | -0.62 | - |
|          | 1.02       | -1.67      | -0.76 | -0.75 | -1.67 | -1.35 | -1.31 |       |       |   |
| GENE968X | 16164_s_at | 16164_s_at | 1     | -0.96 | -0.97 | -0.93 | -0.72 | -1.15 | -1.12 | - |
|          | 1.2        | -2.71      | -1.12 | -1.03 | -2.79 | -2.76 | -1.84 |       |       |   |

|          |            |            |       |       |       |       |       |       |       |   |
|----------|------------|------------|-------|-------|-------|-------|-------|-------|-------|---|
| GENE967X | 15576_s_at | 15576_s_at | 1     | -1.05 | -1.47 | -0.32 | -0.44 | -1.11 | -1.92 | - |
|          | 1.5        | -2.75      | -0.81 | -0.8  | -2.43 | -2.25 | -1.94 |       |       |   |
| GENE570X | 18290_at   | 18290_at   | 1     | -1.21 | -1.34 | -0.48 | -0.19 | -0.58 | -0.41 | - |
|          | 1.05       | -2.15      | -0.92 | -0.35 | -1.64 | -1.32 | -0.92 |       |       |   |
| GENE965X | 14572_at   | 14572_at   | 1     | -1.2  | -0.73 | -0.37 | -0.96 | -1.27 | -0.95 | - |
|          | 1.17       | -1.67      | -1.08 | -0.79 | -2.04 | -1.73 | -1.8  |       |       |   |
| GENE964X | 19116_i_at | 19116_i_at | 1     | -0.58 | -0.96 | -0.89 | -0.79 | -1.37 | -1.04 | - |
|          | 0.71       | -1.77      | -1.06 | -0.71 | -1.74 | -1.49 | -1.4  |       |       |   |
| GENE963X | 13252_s_at | 13252_s_at | 1     | -0.56 | -0.47 | -0.79 | -0.51 | -1.04 | -0.89 | - |
|          | 0.85       | -1.09      | -1.05 | -0.47 | -1.3  | -1.24 | -1.2  |       |       |   |
| GENE962X | 19370_at   | 19370_at   | 1     | -0.83 | -1.36 | -1.33 | -0.58 | -1.67 | -1.5  | - |
|          | 1.23       | -2.3       | -2.11 | -0.91 | -2.61 | -2.55 | -2.11 |       |       |   |
| GENE961X | 13508_s_at | 13508_s_at | 1     | -1.13 | -1.13 | -1.2  | -0.76 | -1.92 | -1.44 | - |
|          | 1.2        | -1.51      | -1.71 | -1.43 | -2.18 | -1.74 | -2.01 |       |       |   |
| GENE978X | 13940_at   | 13940_at   | 1     | -0.38 | -0.55 | -0.34 | -0.33 | -0.5  | -0.26 | - |
|          | 0.59       | -1.06      | -0.7  | -0.59 | -0.93 | -0.44 | -0.75 |       |       |   |
| GENE922X | 17275_i_at | 17275_i_at | 1     | -0.5  | -0.73 | -0.86 | -0.11 | -1.1  | -0.96 | - |
|          | 0.95       | -1.65      | -1.19 | -1    | -1.93 | -0.73 | -0.95 |       |       |   |
| GENE16X  | 15402_at   | 15402_at   | 1     | -0.39 | -0.9  | -0.59 | -0.32 | -0.72 | -0.66 | - |
|          | 0.78       | -0.86      | -0.73 | -0.38 | -1.06 | -0.68 | -0.58 |       |       |   |
| GENE15X  | 18222_at   | 18222_at   | 1     | -0.85 | -1.45 | -1.11 | -0.55 | -1    | -1.33 | - |
|          | 1.32       | -2.06      | -1.56 | -1.02 | -1.78 | -1.44 | -1.78 |       |       |   |
| GENE921X | 20616_at   | 20616_at   | 1     | -0.55 | -1.07 | -1.09 | -0.8  | -1.28 | -1.97 | - |
|          | 1.6        | -2.64      | -2.02 | -1.39 | -2.91 | -1.89 | -0.8  |       |       |   |
| GENE43X  | 19752_s_at | 19752_s_at | 1     | -0.42 | -0.54 | -0.73 | 0.01  | -0.39 | -0.91 | - |
|          | 0.98       | -1.12      | -1.16 | -0.52 | -1.67 | -1.05 | -0.69 |       |       |   |
| GENE42X  | 16802_s_at | 16802_s_at | 1     | -0.76 | -0.64 | -1.14 | -0.47 | -0.54 | -1.09 | - |
|          | 1.08       | -1.54      | -1.25 | -0.91 | -2.41 | -2.36 | -1.47 |       |       |   |
| GENE41X  | 15451_at   | 15451_at   | 1     | -0.96 | -0.78 | -1.97 | -0.6  | -0.67 | -1.46 | - |
|          | 1.3        | -2         | -1.36 | -1.18 | -3.13 | -2.33 | -1.3  |       |       |   |
| GENE3X   | 15548_at   | 15548_at   | 1     | -0.85 | -1.4  | -1.78 | -0.77 | -0.5  | -2.14 | - |
|          | 1.16       | -2.88      | -1.63 | -1.26 | -2.88 | -2.63 | -1.44 |       |       |   |
| GENE2X   | 14396_s_at | 14396_s_at | 1     | -1.65 | -1.5  | -1.69 | -1.06 | -1.08 | -1.32 | - |
|          | 1.21       | -2.91      | -1.87 | -0.87 | -2.76 | -2.32 | -1.28 |       |       |   |
| GENE1X   | 12169_i_at | 12169_i_at | 1     | -1.31 | -1.64 | -2.16 | -0.79 | -1.13 | -1.92 | - |
|          | 1.7        | -4.2       | -3.09 | -1.36 | -3.67 | -3.09 | -1.92 |       |       |   |
| GENE0X   | 19127_at   | 19127_at   | 1     | -1.5  | -1.76 | -1.82 | -1.18 | -1.47 | -1.91 | - |
|          | 1.72       | -3.93      | -2.29 | -1.68 | -3.23 | -4.01 | -1.81 |       |       |   |
| GENE966X | 12810_at   | 12810_at   | 1     | -0.8  | -0.91 | -0.66 | -0.88 | -1.11 | -0.95 | - |
|          | 1.55       | -1.67      | -1.34 | -1.12 | -2.07 | -1.74 | -1.34 |       |       |   |
| GENE48X  | 15070_at   | 15070_at   | 1     | -0.57 | -0.6  | -0.71 | -0.53 | -0.92 | -0.8  | - |
|          | 0.84       | -1.25      | -1.31 | -0.73 | -1.62 | -1.21 | -1.08 |       |       |   |
| GENE47X  | 14081_at   | 14081_at   | 1     | -0.98 | -0.95 | -0.75 | -0.83 | -0.9  | -1.03 | - |
|          | 0.94       | -1.66      | -1.6  | -1.26 | -2.09 | -1.7  | -1.48 |       |       |   |
| GENE49X  | 18154_at   | 18154_at   | 1     | -0.59 | -0.48 | -0.44 | -0.42 | -0.65 | -0.46 | - |
|          | 0.42       | -1.05      | -0.78 | -0.85 | -1.32 | -0.81 | -0.71 |       |       |   |
| GENE46X  | 15057_at   | 15057_at   | 1     | -1.01 | -0.54 | -0.78 | -0.73 | -0.72 | -0.94 | - |
|          | 1.57       | -2.48      | -1.24 | -1.14 | -2.85 | -1.56 | -1.53 |       |       |   |
| GENE45X  | 13637_at   | 13637_at   | 1     | -1.08 | -1.24 | -1.19 | -1.48 | -1.19 | -1.08 | - |
|          | 1.96       | -2.88      | -1.79 | -1.55 | -3.88 | -2.45 | -1.43 |       |       |   |
| GENE44X  | 14386_at   | 14386_at   | 1     | -1.43 | -1.25 | -0.94 | -1.47 | -1.1  | -1.67 | - |
|          | 2.71       | -3.1       | -2.12 | -2.2  | -4.1  | -2.86 | -2.06 |       |       |   |
| GENE54X  | 16067_at   | 16067_at   | 1     | -0.51 | -0.42 | -0.39 | -0.51 | -0.7  | -0.76 | - |
|          | 0.96       | -1.03      | -0.91 | -0.83 | -1.65 | -1.26 | -0.31 |       |       |   |
| GENE53X  | 13682_s_at | 13682_s_at | 1     | -0.78 | -0.46 | -0.47 | -0.84 | -0.91 | -0.97 | - |
|          | 1.33       | -1.38      | -1.02 | -1.04 | -1.97 | -1.5  | -0.69 |       |       |   |



|           |            |            |       |       |       |       |       |       |       |    |
|-----------|------------|------------|-------|-------|-------|-------|-------|-------|-------|----|
| GENE52X   | 15645_s_at | 15645_s_at | 1     | -0.58 | -0.49 | -0.59 | -0.91 | -0.82 | -0.93 | -  |
| 1.33      | -1.6       | -1.3       | -1.06 | -2.38 | -2.11 | -0.75 |       |       |       |    |
| GENE51X   | 19499_s_at | 19499_s_at | 1     | -0.97 | -0.21 | -0.57 | -0.47 | -0.67 | -0.89 | -  |
| 1.07      | -1.3       | -1.45      | -1.28 | -2    | -1.89 | -0.77 |       |       |       |    |
| GENE50X   | 19627_s_at | 19627_s_at | 1     | -0.94 | -0.5  | -0.92 | -0.71 | -1    | -1.01 | -  |
| 1.71      | -2.6       | -2.2       | -2.28 | -3.42 | -2.51 | -1.53 |       |       |       |    |
| GENE1061X | 18230_at   | 18230_at   | 1     | -0.24 | -0.19 | -0.03 | -0.12 | -0.4  | -0.38 | -  |
| 0.63      | -0.79      | -0.39      | -0.23 | -1.09 | -0.69 | -0.17 |       |       |       |    |
| GENE1060X | 15105_s_at | 15105_s_at | 1     | -0.76 | -0.15 | 0.56  | -0.34 | -0.37 | -0.54 | -  |
| 1.07      | -1.25      | -0.76      | -0.65 | -1.57 | -1.37 | -0.3  |       |       |       |    |
| GENE1059X | 15610_at   | 15610_at   | 1     | -1.11 | -0.14 | 0.27  | -0.57 | -0.88 | -0.89 | -  |
| 0.83      | -1.24      | -0.75      | -0.29 | -1.95 | -0.72 | -0.74 |       |       |       |    |
| GENE1062X | 17973_s_at | 17973_s_at | 1     | -0.92 | -0.75 | -0.29 | -2.51 | -0.86 | -0.47 | -  |
| 0.92      | -1.93      | -0.61      | -0.23 | -2.2  | -2.1  | -0.91 |       |       |       |    |
| GENE1069X | 13218_s_at | 13218_s_at | 1     | -0.7  | -0.17 | -0.22 | -0.86 | -0.44 | -0.49 | -  |
| 1.15      | -1.17      | -0.23      | -0.76 | -1.27 | -0.64 | -0.25 |       |       |       |    |
| GENE1068X | 18245_s_at | 18245_s_at | 1     | -0.57 | -0.35 | 0.21  | -0.46 | -0.55 | -0.24 | -  |
| 1.04      | -0.91      | -0.25      | -0.79 | -1.35 | -0.9  | -0.25 |       |       |       |    |
| GENE1067X | 15972_at   | 15972_at   | 1     | -0.61 | -0.28 | 0.14  | -0.61 | -0.39 | -0.36 | -  |
| 1.25      | -1.05      | -0.47      | -0.65 | -1.36 | -1.08 | -0.1  |       |       |       |    |
| GENE1066X | 13230_at   | 13230_at   | 1     | -0.81 | -0.08 | 0.21  | -0.84 | -0.56 | -0.66 | -  |
| 1.34      | -0.96      | -0.59      | -1.15 | -1.26 | -1.18 | -0.31 |       |       |       |    |
| GENE1065X | 15207_s_at | 15207_s_at | 1     | -1.63 | -0.39 | -0.24 | -1.55 | -0.86 | -0.5  | -  |
| 2.11      | -2.18      | -1.53      | -1.95 | -2.77 | -2.43 | -0.26 |       |       |       |    |
| GENE1073X | 20401_at   | 20401_at   | 1     | -0.2  | -0.28 | 0.21  | -0.77 | -0.31 | -0.56 | -  |
| 0.8       | -0.72      | -0.43      | -0.83 | -1.01 | -0.54 | -0.4  |       |       |       |    |
| GENE595X  | 18886_at   | 18886_at   | 1     | -0.52 | 0.17  | 0.14  | -1.39 | -0.39 | -0.67 | -  |
| 1.85      | -1.81      | -1.04      | -1.47 | -1.47 | -1.84 | -0.76 |       |       |       |    |
| GENE1078X | 19833_s_at | 19833_s_at | 1     | -0.53 | -0.38 | -0.36 | -0.97 | -0.79 | -0.32 | -1 |
|           | -1.23      | -1.09      | -1.11 | -0.85 | -0.46 | -0.03 |       |       |       |    |
| GENE1077X | 15186_s_at | 15186_s_at | 1     | -0.79 | -1.04 | -0.88 | -1.48 | -1.34 | -1.28 | -  |
| 1.65      | -1.34      | -1.01      | -1.93 | -1.34 | -0.93 | 0.09  |       |       |       |    |
| GENE1076X | 18696_s_at | 18696_s_at | 1     | -1.17 | -1.17 | -1.48 | -1.61 | -1    | -1.14 | -  |
| 1.94      | -1.24      | -1.58      | -2.85 | -1.49 | -1.39 | 0.05  |       |       |       |    |
| GENE1075X | 14940_i_at | 14940_i_at | 1     | -0.68 | -1.58 | -1.2  | -1.88 | -0.86 | -1    | -  |
| 0.75      | -1.76      | -1.2       | -1.2  | -2.21 | -1.44 | 0.57  |       |       |       |    |
| GENE1082X | 15647_s_at | 15647_s_at | 1     | -1.03 | -0.5  | -0.7  | -0.89 | -0.58 | -0.95 | -  |
| 1.15      | -1.41      | -0.91      | -0.49 | -0.96 | -0.77 | 0.09  |       |       |       |    |
| GENE1081X | 15529_at   | 15529_at   | 1     | -0.61 | -0.43 | -0.73 | -0.6  | -0.61 | -1.02 | -  |
| 0.66      | -0.95      | -0.66      | -0.63 | -1    | -0.58 | -0.36 |       |       |       |    |
| GENE1072X | 16380_at   | 16380_at   | 1     | -0.54 | -0.47 | -0.45 | -1.14 | -0.53 | -0.75 | -  |
| 1.28      | -0.64      | -0.68      | -1.02 | -1.28 | -0.88 | -0.29 |       |       |       |    |
| GENE1064X | 17995_s_at | 17995_s_at | 1     | -0.62 | -0.57 | -0.58 | -1.39 | -0.55 | -0.38 | -  |
| 0.92      | -1.19      | -1.1       | -0.91 | -1.45 | -1.27 | -0.5  |       |       |       |    |
| GENE1063X | 15549_at   | 15549_at   | 1     | -0.68 | -0.45 | -0.55 | -1.58 | -0.68 | -0.75 | -  |
| 1.2       | -1.36      | -0.75      | -0.79 | -1.95 | -0.86 | -0.61 |       |       |       |    |
| GENE1084X | 15179_s_at | 15179_s_at | 1     | -0.3  | -0.55 | -0.76 | -1.08 | -0.37 | -0.29 | -  |
| 0.8       | -1         | -0.71      | -1    | -0.92 | -0.33 | -0.81 |       |       |       |    |
| GENE1083X | 19429_at   | 19429_at   | 1     | -1.13 | -1.35 | -0.26 | -1.81 | -1.03 | -0.12 | -  |
| 1.75      | -1.89      | -2         | -1.53 | -1.89 | -0.49 | -1.29 |       |       |       |    |
| GENE1085X | 14539_s_at | 14539_s_at | 1     | -0.76 | -0.22 | -0.58 | -0.56 | -0.2  | 0.06  | -  |
| 0.65      | -1.16      | -0.58      | -0.35 | -0.52 | -0.5  | -0.4  |       |       |       |    |
| GENE1080X | 16675_g_at | 16675_g_at | 1     | -1.36 | -0.54 | -0.37 | -1.01 | -0.57 | -0.62 | -  |
| 0.89      | -0.97      | -0.75      | -0.94 | -1.02 | -0.56 | -0.49 |       |       |       |    |
| GENE1079X | 13108_at   | 13108_at   | 1     | -1.15 | -0.55 | -0.55 | -1.12 | -0.44 | -0.32 | -  |
| 1.27      | -1.24      | -1.08      | -1.22 | -1.4  | -0.75 | -0.62 |       |       |       |    |

|           |            |            |       |       |       |       |       |       |       |   |
|-----------|------------|------------|-------|-------|-------|-------|-------|-------|-------|---|
| GENE552X  | 14505_at   | 14505_at   | 1     | -2.8  | -1.03 | -1.07 | -1.16 | -1.27 | -0.78 | - |
| 2.63      | -2.77      | -1.92      | -2.48 | -2.35 | -1.92 | -2.8  |       |       |       |   |
| GENE551X  | 18396_at   | 18396_at   | 1     | -2.58 | -0.96 | -2.2  | -1.44 | -1.3  | -1.52 | - |
| 2.58      | -2.88      | -2.2       | -2.58 | -2.88 | -2.2  | -2.78 |       |       |       |   |
| GENE14X   | 15089_at   | 15089_at   | 1     | -0.67 | -0.6  | -0.56 | -0.67 | -0.64 | -0.45 | - |
| 1.01      | -0.95      | -0.55      | -0.68 | -1.06 | -0.81 | -0.67 |       |       |       |   |
| GENE13X   | 13635_at   | 13635_at   | 1     | -1.19 | -1.32 | -1.8  | -1.37 | -1.17 | -1.17 | - |
| 1.79      | -1.86      | -1.17      | -1.66 | -1.57 | -1.47 | -1.11 |       |       |       |   |
| GENE1043X | 16592_s_at | 16592_s_at | 1     | -0.76 | -0.32 | -0.68 | -1    | -0.27 | -0.66 | - |
| 1.21      | -1.4       | -1.32      | -2.07 | -1.69 | -1.68 | -0.81 |       |       |       |   |
| GENE575X  | 19832_s_at | 19832_s_at | 1     | -0.58 | -0.02 | -0.37 | -1.02 | -0.31 | -0.91 | - |
| 1.02      | -0.97      | -1.27      | -1.64 | -1.21 | -0.77 | -0.77 |       |       |       |   |
| GENE574X  | 16163_s_at | 16163_s_at | 1     | -0.81 | 0.15  | 0     | -1.95 | -0.36 | -0.35 | - |
| 1.77      | -1.29      | -1.35      | -2.53 | -1.75 | -1.35 | -1.03 |       |       |       |   |
| GENE573X  | 20524_at   | 20524_at   | 1     | -1.94 | -0.24 | -0.44 | -4.32 | -0.4  | -2.5  | - |
| 4.05      | -2.86      | -3.08      | -4.32 | -4.86 | -3.76 | -2.67 |       |       |       |   |
| GENE576X  | 14126_s_at | 14126_s_at | 1     | -0.36 | 0.05  | -0.27 | -0.59 | -0.27 | -0.31 | - |
| 0.67      | -0.64      | -1.03      | -1.05 | -1.58 | -0.49 | -0.45 |       |       |       |   |
| GENE636X  | 20457_at   | 20457_at   | 1     | -0.81 | -0.17 | -0.33 | -0.75 | -0.07 | -0.28 | - |
| 1.24      | -0.31      | -1.03      | -0.83 | -0.74 | -0.82 | -0.56 |       |       |       |   |
| GENE562X  | 14753_s_at | 14753_s_at | 1     | -0.72 | -0.64 | -1.03 | -1.34 | -0.28 | -0.82 | - |
| 1.66      | -1.19      | -1.47      | -1.54 | -1.28 | -1.37 | -1.47 |       |       |       |   |
| GENE561X  | 16942_at   | 16942_at   | 1     | -0.82 | -0.47 | -0.55 | -0.95 | -0.32 | -0.12 | - |
| 1.1       | -1         | -1.23      | -1.19 | -1.29 | -1.18 | -1.15 |       |       |       |   |
| GENE1008X | 18829_at   | 18829_at   | 1     | -0.24 | 0.12  | -0.25 | -0.61 | -0.02 | -0.69 | - |
| 0.88      | -0.98      | -1.31      | -0.97 | -1.6  | -1.84 | 0.23  |       |       |       |   |
| GENE1001X | 18327_at   | 18327_at   | 1     | -0.46 | -0.14 | -0.05 | -0.67 | -0.18 | -0.24 | - |
| 0.58      | -0.91      | -0.93      | -0.5  | -1.76 | -1.43 | 0.32  |       |       |       |   |
| GENE1000X | 13118_f_at | 13118_f_at | 1     | -0.5  | -0.23 | -0.05 | -0.69 | -0.4  | -0.1  | - |
| 0.95      | -1.56      | -0.93      | -0.66 | -2.03 | -1.45 | 0.11  |       |       |       |   |
| GENE1005X | 14075_at   | 14075_at   | 1     | -0.71 | -0.07 | 0.03  | -0.88 | 0.07  | -0.52 | - |
| 0.58      | -0.63      | -0.72      | -0.91 | -1.43 | -1.59 | -0.52 |       |       |       |   |
| GENE1004X | 12284_at   | 12284_at   | 1     | -0.69 | 0.39  | 0.35  | -1.32 | 0.12  | -0.51 | - |
| 1.38      | -1.9       | -2.14      | -1.38 | -2.9  | -3.4  | -0.83 |       |       |       |   |
| GENE1003X | 13596_at   | 13596_at   | 1     | -0.45 | 0     | -0.22 | -0.78 | -0.18 | -0.96 | - |
| 1.35      | -2.27      | -2.04      | -1.28 | -3.22 | -3.79 | -1.39 |       |       |       |   |
| GENE860X  | 17419_at   | 17419_at   | 1     | -0.54 | 0.13  | 0.07  | -0.15 | 0.51  | -0.01 | - |
| 0.93      | -0.58      | -1.22      | -0.74 | -1.65 | -2.19 | -0.18 |       |       |       |   |
| GENE1047X | 19522_at   | 19522_at   | 1     | -0.48 | -0.08 | -0.22 | -0.18 | -0.3  | -0.58 | - |
| 1.08      | -0.86      | -0.69      | -0.48 | -1.02 | -0.97 | 0     |       |       |       |   |
| GENE1046X | 12983_at   | 12983_at   | 1     | -0.76 | -0.29 | -0.13 | -0.44 | -0.12 | -0.35 | - |
| 1.5       | -0.88      | -1.03      | -0.69 | -1.48 | -1.27 | -0.18 |       |       |       |   |
| GENE1045X | 16046_s_at | 16046_s_at | 1     | -0.84 | -0.22 | -0.25 | -0.38 | -0.17 | -0.52 | - |
| 1.05      | -1.28      | -0.78      | -0.59 | -1.16 | -1.43 | -0.3  |       |       |       |   |
| GENE1044X | 13162_at   | 13162_at   | 1     | -1.16 | 0.08  | -0.7  | -0.25 | -0.05 | -0.51 | - |
| 1.34      | -1.64      | -0.92      | -0.59 | -1.39 | -1.3  | -0.42 |       |       |       |   |
| GENE1051X | 15416_at   | 15416_at   | 1     | -0.42 | 0.12  | 0.24  | -0.15 | 0.14  | -0.21 | - |
| 0.85      | -0.79      | -0.85      | -0.57 | -0.95 | -1.11 | -0.76 |       |       |       |   |
| GENE1050X | 12532_at   | 12532_at   | 1     | -0.92 | -0.27 | 0.18  | -0.89 | -0.41 | -0.49 | - |
| 1.49      | -2.28      | -2.16      | -1.48 | -2.2  | -2.31 | -2.07 |       |       |       |   |
| GENE1049X | 17215_at   | 17215_at   | 1     | -1.45 | 0.27  | 0.44  | -1.38 | -0.06 | -0.55 | - |
| 2.09      | -3.1       | -2.34      | -1.48 | -3.05 | -3.14 | -1.89 |       |       |       |   |
| GENE1048X | 14105_at   | 14105_at   | 1     | -0.79 | -0.1  | 0.22  | -0.23 | -0.22 | -0.58 | - |
| 1.49      | -1         | -1.84      | -1.02 | -2    | -1.17 | -1.28 |       |       |       |   |
| GENE1007X | 18835_at   | 18835_at   | 1     | -0.31 | -0.27 | -0.45 | -0.79 | 0.07  | -0.27 | - |
| 1.33      | -1.23      | -1.45      | -1.48 | -2    | -1.77 | -0.47 |       |       |       |   |

|           |            |            |       |       |       |       |       |       |       |   |
|-----------|------------|------------|-------|-------|-------|-------|-------|-------|-------|---|
| GENE1006X | 20443_s_at | 20443_s_at | 1     | -1.31 | -0.46 | -1.11 | -3.2  | -0.82 | -1.91 | - |
|           | 4.2        | -3.46      | -3.73 | -3.06 | -4.63 | -4.62 | -1.61 |       |       |   |
| GENE1042X | 15783_s_at | 15783_s_at | 1     | -0.8  | -0.28 | -0.57 | -0.72 | -0.37 | -0.74 | - |
|           | 1.11       | -1.23      | -1.15 | -1.38 | -1.58 | -1.74 | -0.92 |       |       |   |
| GENE1041X | 19446_i_at | 19446_i_at | 1     | -0.94 | -0.33 | -0.93 | -1.15 | -0.47 | -1.11 | - |
|           | 1.71       | -2.01      | -1.87 | -1.77 | -2.41 | -2.37 | -1.53 |       |       |   |
| GENE1040X | 13404_at   | 13404_at   | 1     | -1.56 | -0.57 | -0.84 | -1.66 | -0.45 | -1.24 | - |
|           | 2.33       | -2.38      | -2.32 | -2.09 | -2.13 | -2.76 | -1.49 |       |       |   |
| GENE1031X | 17701_at   | 17701_at   | 1     | -1.18 | -0.31 | -0.62 | -0.83 | -0.2  | -0.54 | - |
|           | 1.83       | -1.81      | -1.17 | -1.44 | -1.74 | -1.66 | -1.06 |       |       |   |
| GENE593X  | 20057_at   | 20057_at   | 1     | -0.79 | -0.36 | -0.14 | -0.97 | 0.17  | -0.43 | - |
|           | 1.32       | -1.33      | -1.23 | -1.43 | -1.5  | -1.91 | -1.26 |       |       |   |
| GENE1028X | 18611_at   | 18611_at   | 1     | -0.99 | -0.49 | -0.48 | -0.74 | -0.35 | -0.59 | - |
|           | 1.72       | -1.91      | -2.13 | -1.12 | -2.2  | -2.72 | -1.58 |       |       |   |
| GENE1027X | 12793_at   | 12793_at   | 1     | -0.86 | -0.02 | -0.25 | -1.01 | -0.5  | -0.33 | - |
|           | 1.73       | -1.85      | -2.28 | -1.17 | -2.4  | -2.33 | -1.03 |       |       |   |
| GENE289X  | 19361_s_at | 19361_s_at | 1     | -0.5  | -0.1  | -0.32 | -0.76 | -0.2  | -0.98 | - |
|           | 1.36       | -0.96      | -1.33 | -0.93 | -1.3  | -1.87 | -0.67 |       |       |   |
| GENE288X  | 19907_at   | 19907_at   | 1     | -0.59 | -0.12 | -0.14 | -0.77 | -0.29 | -0.82 | - |
|           | 1.33       | -0.66      | -1.33 | -0.92 | -1.61 | -1.48 | -0.88 |       |       |   |
| GENE287X  | 12235_at   | 12235_at   | 1     | -1.08 | 0.07  | -0.97 | -1.08 | -0.5  | -1.14 | - |
|           | 2.28       | -1.2       | -2.55 | -1.62 | -2.04 | -2.55 | -1.55 |       |       |   |
| GENE1203X | 18339_at   | 18339_at   | 1     | 0.04  | -0.34 | -1.63 | 0.16  | -0.45 | -1.22 | - |
|           | 0.65       | -1.23      | -1.8  | -0.34 | -1.13 | -1.28 | -0.16 |       |       |   |
| GENE1202X | 18975_g_at | 18975_g_at | 1     | 0.1   | -0.17 | -1.4  | -0.05 | -0.37 | -1.34 | - |
|           | 0.24       | -1.95      | -2.02 | -0.61 | -1.22 | -1.84 | -0.07 |       |       |   |
| GENE1201X | 14371_at   | 14371_at   | 1     | 0     | -0.51 | -0.89 | -0.11 | -0.08 | -0.85 | - |
|           | 0.08       | -0.73      | -1.06 | -0.21 | -1.25 | -1.06 | -0.08 |       |       |   |
| GENE1184X | 15534_f_at | 15534_f_at | 1     | -0.28 | -0.69 | -1.72 | -0.4  | 0.07  | -0.8  | - |
|           | 0.15       | -1.36      | -1.28 | -0.54 | -0.92 | -0.81 | -0.47 |       |       |   |
| GENE615X  | 13081_s_at | 13081_s_at | 1     | -0.28 | -0.07 | -0.91 | -0.38 | 0.36  | -0.45 | - |
|           | 0.39       | -0.34      | -1.04 | -0.5  | -0.42 | -0.63 | -0.42 |       |       |   |
| GENE614X  | 14401_at   | 14401_at   | 1     | -0.15 | 0.08  | -1.3  | -0.66 | 0.22  | -0.39 | - |
|           | 0.5        | -0.89      | -1.1  | -0.48 | -0.93 | -0.96 | -0.01 |       |       |   |
| GENE611X  | 20573_at   | 20573_at   | 1     | -1.4  | -0.06 | -2.92 | -1.32 | 0.43  | -1.4  | - |
|           | 2.68       | -2.2       | -2.02 | -1.49 | -2.2  | -3.4  | -0.86 |       |       |   |
| GENE613X  | 18647_at   | 18647_at   | 1     | -0.61 | -0.21 | -1.63 | -0.65 | -0.31 | -1.19 | - |
|           | 1.19       | -1.46      | -1.14 | -0.82 | -1.17 | -1.19 | -0.93 |       |       |   |
| GENE612X  | 17943_at   | 17943_at   | 1     | -0.49 | -0.15 | -1.66 | -0.4  | 0.18  | -1.23 | - |
|           | 0.87       | -1.71      | -1.63 | -0.74 | -1.23 | -1.56 | -1.15 |       |       |   |
| GENE121X  | 20058_at   | 20058_at   | 1     | -0.48 | -0.33 | -1.23 | -0.37 | -0.08 | -1.29 | - |
|           | 1.14       | -1.18      | -1.58 | -1.08 | -1.5  | -1.75 | -0.81 |       |       |   |
| GENE1018X | 14651_at   | 14651_at   | 1     | -0.88 | -0.17 | -0.31 | -0.56 | -0.6  | -0.63 | - |
|           | 0.96       | -1.13      | -0.89 | -0.74 | -1.37 | -1.02 | -0.85 |       |       |   |
| GENE1017X | 12192_at   | 12192_at   | 1     | -1.14 | -0.26 | -0.29 | -1.33 | -1    | -1.12 | - |
|           | 1.74       | -1.84      | -1.61 | -1.46 | -2.5  | -1.7  | -1.68 |       |       |   |
| GENE1016X | 19717_at   | 19717_at   | 1     | -1.13 | -0.44 | -0.38 | -1.16 | -0.79 | -0.67 | - |
|           | 1.75       | -2.56      | -1.58 | -1.7  | -2.69 | -2.08 | -1.4  |       |       |   |
| GENE1015X | 15238_at   | 15238_at   | 1     | -1.14 | -0.62 | -0.93 | -1.5  | -0.71 | -1.27 | - |
|           | 3.35       | -3.26      | -2.93 | -2.08 | -2.94 | -2.93 | -2.01 |       |       |   |
| GENE1014X | 16322_at   | 16322_at   | 1     | -1.05 | -0.83 | -1.14 | -1.85 | -0.97 | -2.21 | - |
|           | 3.53       | -3.56      | -3.08 | -2.53 | -3.56 | -3.35 | -2.7  |       |       |   |
| GENE1013X | 16229_at   | 16229_at   | 1     | -1.7  | -0.22 | -0.67 | -1.77 | -0.82 | -1.47 | - |
|           | 2.74       | -3.07      | -3.98 | -2.34 | -3.32 | -2.78 | -1.95 |       |       |   |
| GENE1033X | 15932_at   | 15932_at   | 1     | -1.03 | -0.54 | -0.69 | -1.33 | -0.4  | -0.95 | - |
|           | 1.61       | -2.15      | -1.76 | -1.38 | -2.38 | -2.38 | -1.64 |       |       |   |

|           |            |            |       |       |       |       |       |       |       |   |
|-----------|------------|------------|-------|-------|-------|-------|-------|-------|-------|---|
| GENE1032X | 15303_at   | 15303_at   | 1     | -1.5  | -0.88 | -1.7  | -1.65 | -0.75 | -1.65 | - |
|           | 2.11       | -3.29      | -2.6  | -2.18 | -3.42 | -3.82 | -2.25 |       |       |   |
| GENE267X  | 15928_at   | 15928_at   | 1     | -1.3  | -0.6  | -1.11 | -0.81 | -0.57 | -1.16 | - |
|           | 1.71       | -2.36      | -2.02 | -1.44 | -2.48 | -2.56 | -2.01 |       |       |   |
| GENE266X  | 13651_at   | 13651_at   | 1     | -1.51 | -0.93 | -1.03 | -0.97 | -1.2  | -1.38 | - |
|           | 2.19       | -2.88      | -2.26 | -1.51 | -3.23 | -3.15 | -2.79 |       |       |   |
| GENE1030X | 16293_at   | 16293_at   | 1     | -1.71 | -0.86 | -1.13 | -1.06 | -0.78 | -1    | - |
|           | 1.93       | -2.63      | -2.13 | -2.2  | -2.63 | -2.13 | -2.22 |       |       |   |
| GENE1029X | 14022_s_at | 14022_s_at | 1     | -1.81 | -1.03 | -1.02 | -1.61 | -0.87 | -0.99 | - |
|           | 2.34       | -2.93      | -2.73 | -2.55 | -2.79 | -2.88 | -2.44 |       |       |   |
| GENE36X   | 20187_at   | 20187_at   | 1     | -0.75 | -0.74 | -0.68 | -0.79 | -0.58 | -0.98 | - |
|           | 1.08       | -2.21      | -2.05 | -1.31 | -2.13 | -1.75 | -1.46 |       |       |   |
| GENE35X   | 18831_at   | 18831_at   | 1     | -0.75 | -0.54 | -0.59 | -0.56 | -0.54 | -0.86 | - |
|           | 1.34       | -1.73      | -1.67 | -1.34 | -2.07 | -1.67 | -1.62 |       |       |   |
| GENE34X   | 18471_at   | 18471_at   | 1     | -1.46 | -1.39 | -1.61 | -1.54 | -1.02 | -1.8  | - |
|           | 2.39       | -3.51      | -3.48 | -2.62 | -4.24 | -4.07 | -3.04 |       |       |   |
| GENE565X  | 15826_at   | 15826_at   | 1     | -0.32 | -0.38 | -0.29 | -0.14 | -0.19 | -0.49 | - |
|           | 1.14       | -1.74      | -1.26 | -0.75 | -1.46 | -1.11 | -1.4  |       |       |   |
| GENE564X  | 20692_at   | 20692_at   | 1     | -0.72 | -0.36 | -0.36 | -0.53 | -0.39 | -0.44 | - |
|           | 1.28       | -1.43      | -1.09 | -0.68 | -1.11 | -0.75 | -0.82 |       |       |   |
| GENE563X  | 19106_at   | 19106_at   | 1     | -0.96 | -0.95 | -1.12 | -0.51 | -0.61 | -1    | - |
|           | 2.25       | -2.27      | -1.58 | -1.25 | -2.53 | -1.58 | -1.56 |       |       |   |
| GENE603X  | 12117_at   | 12117_at   | 1     | -0.57 | -0.43 | -0.51 | -0.42 | -0.05 | 0.03  | - |
|           | 0.53       | -0.94      | -0.52 | -0.62 | -1.02 | -0.82 | -1.17 |       |       |   |
| GENE602X  | 19179_s_at | 19179_s_at | 1     | -0.56 | -0.27 | -0.41 | -0.57 | -0.14 | -0.38 | - |
|           | 0.8        | -1.07      | -0.46 | -0.4  | -1.11 | -0.52 | -0.87 |       |       |   |
| GENE601X  | 12214_g_at | 12214_g_at | 1     | -0.55 | -0.31 | -0.35 | -0.58 | -0.09 | -0.01 | - |
|           | 1.1        | -1.43      | -0.68 | -0.81 | -1.23 | -0.46 | -0.96 |       |       |   |
| GENE1074X | 12100_at   | 12100_at   | 1     | -0.12 | 0.43  | -2.07 | -1.25 | -0.73 | -1.07 | - |
|           | 1.25       | -2         | -1.07 | -1.49 | -2    | -1.07 | -1.13 |       |       |   |
| GENE1071X | 16118_s_at | 16118_s_at | 1     | -0.74 | -0.3  | -0.09 | -0.77 | -0.64 | -0.72 | - |
|           | 0.91       | -0.85      | -0.57 | -1.32 | -1.29 | -0.94 | -0.61 |       |       |   |
| GENE1070X | 13655_at   | 13655_at   | 1     | -0.82 | -0.25 | -0.36 | -0.87 | -0.59 | -0.85 | - |
|           | 1.46       | -1.01      | -0.85 | -1.28 | -1.33 | -1.13 | -0.61 |       |       |   |
| GENE559X  | 19184_at   | 19184_at   | 1     | -2.07 | -0.58 | -0.37 | -2.22 | -1.28 | -1.65 | - |
|           | 2.48       | -1.7       | -1.65 | -2.3  | -2.7  | -2.13 | -2.48 |       |       |   |
| GENE558X  | 19789_at   | 19789_at   | 1     | -2.12 | -1.21 | -1.11 | -3.3  | -1.49 | -2.11 | - |
|           | 4.44       | -2.98      | -2.37 | -3.44 | -3.98 | -2.37 | -3    |       |       |   |
| GENE580X  | 14995_at   | 14995_at   | 1     | -0.9  | -0.16 | -0.7  | -0.79 | -0.43 | -0.85 | - |
|           | 1.17       | -0.86      | -0.63 | -1.09 | -1.58 | -1.02 | -1.45 |       |       |   |
| GENE579X  | 13036_at   | 13036_at   | 1     | -1.01 | -0.01 | -0.44 | -1.27 | -0.68 | -1.48 | - |
|           | 1.65       | -1.54      | -1.28 | -1.86 | -2.48 | -1.81 | -2.36 |       |       |   |
| GENE560X  | 16811_at   | 16811_at   | 1     | -0.52 | -0.35 | -0.29 | -0.48 | -0.38 | -0.6  | - |
|           | 1.29       | -0.64      | -0.8  | -1.18 | -1.3  | -1.08 | -1.1  |       |       |   |
| GENE557X  | 19710_s_at | 19710_s_at | 1     | -0.66 | -0.29 | -0.32 | -0.65 | -0.45 | -0.79 | - |
|           | 1.23       | -1.13      | -0.58 | -1.06 | -1.34 | -0.84 | -1.52 |       |       |   |
| GENE556X  | 18798_at   | 18798_at   | 1     | -1.29 | -0.49 | -0.54 | -1.56 | -0.71 | -1    | - |
|           | 1.9        | -2.27      | -1.1  | -1.84 | -2.45 | -1.58 | -1.94 |       |       |   |
| GENE555X  | 18301_s_at | 18301_s_at | 1     | -1.52 | -0.91 | -1.33 | -1.86 | -1.63 | -1.97 | - |
|           | 2.95       | -3.45      | -1.81 | -3.21 | -3.4  | -2.15 | -2.85 |       |       |   |
| GENE554X  | 14533_i_at | 14533_i_at | 1     | -0.79 | -0.05 | -0.94 | -1.06 | -0.53 | -0.94 | - |
|           | 1.52       | -2.05      | -1.17 | -1.39 | -2.05 | -1.75 | -1.86 |       |       |   |
| GENE553X  | 16501_s_at | 16501_s_at | 1     | -1.68 | -0.52 | -1.52 | -1.09 | -0.82 | -1.63 | - |
|           | 2.12       | -2.43      | -1.73 | -1.62 | -2.89 | -2.18 | -2.37 |       |       |   |
| GENE584X  | 18020_at   | 18020_at   | 1     | -0.51 | -0.13 | -0.58 | -0.54 | -0.49 | -0.91 | - |
|           | 0.73       | -0.61      | -0.87 | -1.32 | -0.86 | -1.09 | -1.3  |       |       |   |

|           |            |            |       |       |       |       |       |       |       |    |
|-----------|------------|------------|-------|-------|-------|-------|-------|-------|-------|----|
| GENE583X  | 16965_at   | 16965_at   | 1     | -0.63 | -0.34 | -0.95 | -0.78 | -0.38 | -1.09 | -  |
|           | 0.95       | -1.16      | -1.31 | -1.95 | -1.16 | -1.78 | -1.45 |       |       |    |
| GENE582X  | 17645_s_at | 17645_s_at | 1     | -0.51 | 0.44  | -0.58 | -1.18 | -0.9  | -1.18 | -  |
|           | 0.8        | -1.51      | -1.37 | -1.86 | -1.4  | -1.54 | -1.57 |       |       |    |
| GENE581X  | 14666_s_at | 14666_s_at | 1     | -0.53 | -0.14 | -0.87 | -1.09 | -0.52 | -1.3  | -  |
|           | 0.8        | -1.43      | -2.13 | -1.87 | -1.7  | -1.92 | -1.67 |       |       |    |
| GENE578X  | 15383_at   | 15383_at   | 1     | -0.4  | 0.26  | -0.19 | -0.32 | -0.16 | -0.74 | -  |
|           | 0.73       | -0.89      | -0.63 | -0.91 | -1    | -0.52 | -1.21 |       |       |    |
| GENE577X  | 18743_f_at | 18743_f_at | 1     | -0.26 | 0.41  | 0     | -1.3  | -0.05 | -2.03 | -  |
|           | 1.64       | -2.02      | -1.03 | -2.38 | -2.51 | -2.17 | -2.4  |       |       |    |
| GENE1159X | 12312_at   | 12312_at   | 1     | -0.39 | -1.04 | -3.78 | -1.77 | -1.22 | -2.78 | -1 |
|           | -3.3       | -3.3       | -3.27 | -3.47 | -2.78 | -3.2  |       |       |       |    |
| GENE1161X | 17865_at   | 17865_at   | 1     | -0.25 | -1.06 | -1.6  | -0.64 | -1.02 | -1.32 | -  |
|           | 1.01       | -2.13      | -1.8  | -0.93 | -2.13 | -1.35 | -1.84 |       |       |    |
| GENE1160X | 13322_at   | 13322_at   | 1     | -0.63 | -1.35 | -2.76 | -0.76 | -1.86 | -2.76 | -  |
|           | 1.44       | -3.78      | -2.76 | -2.44 | -3.78 | -2.76 | -3.58 |       |       |    |
| GENE1162X | 15929_at   | 15929_at   | 1     | -0.87 | -1.65 | -3.32 | -1.25 | -1.23 | -2.1  | -  |
|           | 1.97       | -3.45      | -2.9  | -2.97 | -3.72 | -3.58 | -3.74 |       |       |    |
| GENE179X  | 17196_at   | 17196_at   | 1     | -1.51 | -1.86 | -3.76 | -0.84 | -2.3  | -3.28 | -  |
|           | 1.51       | -3.39      | -3.76 | -2.61 | -4.07 | -3.76 | -4.21 |       |       |    |
| GENE1337X | 14994_at   | 14994_at   | 1     | -1.13 | -1.67 | -2.13 | -0.69 | -1.19 | -2.13 | -  |
|           | 1.87       | -1.67      | -1.45 | -1.78 | -1.54 | -2.13 | -2.84 |       |       |    |
| GENE12X   | 12319_at   | 12319_at   | 1     | -2.12 | -2.24 | -2.88 | -2.8  | -1.79 | -2.4  | -  |
|           | 2.8        | -3.37      | -2.88 | -2.8  | -3.37 | -2.88 | -3.63 |       |       |    |
| GENE6X    | 16312_at   | 16312_at   | 1     | -1.73 | -2.78 | -3.07 | -2.32 | -1.87 | -2.71 | -2 |
|           | -3.45      | -2.42      | -1.86 | -3.45 | -3.56 | -3.03 |       |       |       |    |
| GENE535X  | 16983_at   | 16983_at   | 1     | -0.45 | -0.8  | -0.93 | -0.34 | -0.33 | -0.28 | -  |
|           | 0.49       | -1.22      | -1.25 | -0.84 | -1.29 | -2.02 | -1.63 |       |       |    |
| GENE261X  | 13607_at   | 13607_at   | 1     | -0.27 | -0.35 | -0.36 | -0.69 | -0.48 | -0.56 | -  |
|           | 0.5        | -0.95      | -1.05 | -0.77 | -0.67 | -1.43 | -1.39 |       |       |    |
| GENE258X  | 13618_s_at | 13618_s_at | 1     | -1.09 | -1.17 | -0.97 | -1.06 | -0.91 | -0.74 | -  |
|           | 1.27       | -1.72      | -1.87 | -1.17 | -1.81 | -2.35 | -2.55 |       |       |    |
| GENE184X  | 12170_at   | 12170_at   | 1     | -0.14 | -0.28 | -1.04 | -0.25 | -0.49 | -0.57 | -  |
|           | 0.72       | -0.82      | -1.22 | -0.57 | -1.01 | -1.03 | -1.06 |       |       |    |
| GENE183X  | 12887_s_at | 12887_s_at | 1     | -0.43 | -0.77 | -1.42 | -0.64 | -0.45 | -0.79 | -1 |
|           | -0.77      | -1.79      | -0.59 | -0.96 | -1.42 | -1.37 |       |       |       |    |
| GENE185X  | 17505_s_at | 17505_s_at | 1     | -0.32 | -0.18 | -0.85 | -0.17 | -0.47 | -0.49 | -  |
|           | 0.38       | -0.54      | -1.11 | -0.54 | -0.75 | -1.11 | -0.64 |       |       |    |
| GENE182X  | 12022_at   | 12022_at   | 1     | -0.67 | -0.74 | -1.09 | -0.06 | -0.56 | -1.03 | -  |
|           | 0.71       | -1.09      | -1.38 | -0.5  | -1.36 | -1.55 | -1.22 |       |       |    |
| GENE181X  | 19034_at   | 19034_at   | 1     | -1.43 | -2.25 | -3.67 | -1.17 | -1.57 | -3.02 | -  |
|           | 1.91       | -3.19      | -4.1  | -1.12 | -3.32 | -4.61 | -3.48 |       |       |    |
| GENE175X  | 12693_at   | 12693_at   | 1     | -0.58 | -0.33 | -1.31 | -0.52 | -0.27 | -0.98 | -  |
|           | 0.82       | -1.27      | -1.91 | -0.43 | -1.4  | -2.53 | -1.6  |       |       |    |
| GENE174X  | 19870_s_at | 19870_s_at | 1     | -0.68 | -0.33 | -1.93 | -0.71 | -0.14 | -1.47 | -  |
|           | 1.04       | -1.82      | -2.47 | -0.81 | -1.72 | -2.34 | -2.23 |       |       |    |
| GENE173X  | 14284_at   | 14284_at   | 1     | -1.18 | -0.54 | -1.94 | -0.79 | -0.64 | -1.8  | -  |
|           | 1.45       | -2.41      | -3.45 | -1.29 | -2.83 | -3.68 | -3.2  |       |       |    |
| GENE172X  | 13160_at   | 13160_at   | 1     | -0.54 | -0.35 | -2.25 | -0.63 | -0.35 | -2.18 | -  |
|           | 1.19       | -2.25      | -3    | -1.24 | -2.38 | -3.76 | -2.26 |       |       |    |
| GENE171X  | 20383_at   | 20383_at   | 1     | -1.06 | -0.97 | -2.72 | -0.43 | -0.88 | -2.34 | -  |
|           | 1.56       | -2.6       | -3.45 | -1.21 | -2.76 | -3.72 | -2.5  |       |       |    |
| GENE641X  | 14037_at   | 14037_at   | 1     | -1.19 | -0.74 | -1.29 | -1.24 | -0.51 | -1    | -  |
|           | 1.39       | -0.85      | -1.46 | -1.49 | -0.87 | -1.41 | -1.05 |       |       |    |
| GENE640X  | 15074_s_at | 15074_s_at | 1     | -1    | -1.12 | -1.05 | -1    | -0.59 | -1.05 | -  |
|           | 1.34       | -0.83      | -1.42 | -1.66 | -1.39 | -1.52 | -1.21 |       |       |    |

|          |            |            |       |       |       |       |       |       |       |    |
|----------|------------|------------|-------|-------|-------|-------|-------|-------|-------|----|
| GENE639X | 17257_s_at | 17257_s_at | 1     | -0.89 | -0.48 | -1.44 | -1.15 | -0.16 | -1.1  | -  |
|          | 2.1        | -0.71      | -1.9  | -2.02 | -1.48 | -1.9  | -1.65 |       |       |    |
| GENE638X | 14484_at   | 14484_at   | 1     | -1.39 | -1.18 | -3.37 | -1.73 | -0.73 | -2.89 | -  |
|          | 3.32       | -1.64      | -3.37 | -2.83 | -2.32 | -3.37 | -2.67 |       |       |    |
| GENE648X | 15843_at   | 15843_at   | 1     | -0.62 | -0.4  | -0.27 | -0.9  | 0.12  | -1.05 | -  |
|          | 1.15       | -1.23      | -1.27 | -0.95 | -0.87 | -1.15 | -1.07 |       |       |    |
| GENE247X | 16394_at   | 16394_at   | 1     | -0.7  | -0.02 | -0.5  | -0.44 | -0.2  | -0.66 | -  |
|          | 0.66       | -0.79      | -0.89 | -0.62 | -0.94 | -1.05 | -0.87 |       |       |    |
| GENE246X | 16949_s_at | 16949_s_at | 1     | -1.17 | -0.68 | -1.52 | -1.29 | -0.64 | -1.79 | -  |
|          | 1.75       | -2.28      | -2.45 | -1.56 | -2.36 | -2.95 | -2.62 |       |       |    |
| GENE245X | 16502_at   | 16502_at   | 1     | -1.19 | -0.27 | -1.85 | -1.28 | -0.66 | -2.16 | -  |
|          | 1.91       | -2.83      | -2.85 | -1.47 | -2.83 | -3.23 | -2.84 |       |       |    |
| GENE244X | 12787_at   | 12787_at   | 1     | -1.29 | -0.16 | -1.8  | -1.1  | -0.64 | -2.24 | -  |
|          | 1.45       | -2.41      | -2.64 | -1.95 | -2.57 | -2.93 | -2.65 |       |       |    |
| GENE243X | 15511_s_at | 15511_s_at | 1     | -0.53 | -0.11 | -0.83 | -0.98 | -0.77 | -1.41 | -  |
|          | 1.62       | -1.72      | -1.58 | -1.87 | -1.92 | -2    | -1.34 |       |       |    |
| GENE242X | 17503_s_at | 17503_s_at | 1     | -1.27 | -0.62 | -1.46 | -2.05 | -0.75 | -2.84 | -  |
|          | 2.53       | -2.88      | -2.36 | -2.53 | -2.88 | -2.84 | -2.86 |       |       |    |
| GENE241X | 20257_at   | 20257_at   | 1     | -1.18 | -0.3  | -1.86 | -1.5  | -0.77 | -2.93 | -  |
|          | 1.74       | -2.09      | -2.4  | -2.38 | -2.64 | -3.52 | -2.74 |       |       |    |
| GENE240X | 18343_at   | 18343_at   | 1     | -0.94 | -0.7  | -1.77 | -1.05 | -0.83 | -2.77 | -  |
|          | 1.98       | -2.33      | -2.33 | -2.14 | -3.04 | -3    | -2.21 |       |       |    |
| GENE80X  | 15627_at   | 15627_at   | 1     | -0.39 | -0.19 | -0.95 | -0.46 | -0.21 | -0.28 | -  |
|          | 0.52       | -0.94      | -1.14 | -0.83 | -0.88 | -1.05 | -0.47 |       |       |    |
| GENE79X  | 14301_at   | 14301_at   | 1     | -0.66 | -0.3  | -0.91 | -0.62 | -0.17 | -0.48 | -  |
|          | 0.78       | -0.58      | -1.2  | -0.92 | -1.1  | -0.95 | -0.6  |       |       |    |
| GENE78X  | 15502_at   | 15502_at   | 1     | -0.67 | -0.83 | -1.34 | -1.25 | -0.52 | -0.92 | -  |
|          | 0.94       | -1.79      | -2.92 | -1.08 | -1.79 | -1.54 | -1.6  |       |       |    |
| GENE77X  | 15467_at   | 15467_at   | 1     | -0.96 | -1.34 | -0.74 | -1.21 | -0.72 | -0.78 | -  |
|          | 1.49       | -2.13      | -2.66 | -1.45 | -2.45 | -1.83 | -1.74 |       |       |    |
| GENE72X  | 17053_at   | 17053_at   | 1     | -0.54 | -0.5  | -0.8  | -0.52 | -0.58 | -0.68 | -  |
|          | 1.09       | -1.02      | -1.13 | -0.66 | -1.21 | -0.85 | -0.38 |       |       |    |
| GENE71X  | 17495_s_at | 17495_s_at | 1     | -0.61 | -0.57 | -0.88 | -0.5  | -0.46 | -0.79 | -  |
|          | 1.03       | -1         | -1.17 | -0.53 | -1.3  | -1.17 | -0.66 |       |       |    |
| GENE70X  | 17551_s_at | 17551_s_at | 1     | -1.17 | -1.17 | -2.47 | -1.1  | -1.1  | -1.47 | -  |
|          | 1.9        | -2.9       | -2.96 | -2.32 | -3.17 | -2.28 | -1.74 |       |       |    |
| GENE69X  | 19200_s_at | 19200_s_at | 1     | -0.47 | -0.52 | -0.69 | -0.79 | -0.43 | -0.76 | -  |
|          | 0.84       | -0.98      | -1.23 | -0.78 | -1.25 | -1.43 | -0.44 |       |       |    |
| GENE68X  | 14513_s_at | 14513_s_at | 1     | -1.56 | -1.48 | -2.02 | -1.56 | -1.27 | -1.97 | -  |
|          | 2.2        | -2.73      | -2.67 | -2.2  | -2.82 | -3.15 | -0.98 |       |       |    |
| GENE67X  | 15671_s_at | 15671_s_at | 1     | -0.83 | -1.26 | -1.75 | -1.71 | -1.19 | -2.05 | -  |
|          | 1.42       | -1.88      | -2.05 | -1.29 | -2.41 | -2.17 | -1.3  |       |       |    |
| GENE64X  | 13023_at   | 13023_at   | 1     | -1.01 | -0.68 | -1.23 | -1.03 | -0.72 | -1.47 | -  |
|          | 1.44       | -2.72      | -1.88 | -1.96 | -1.92 | -2.27 | -1.11 |       |       |    |
| GENE63X  | 14543_r_at | 14543_r_at | 1     | -1.22 | -0.89 | -1.52 | -1.61 | -0.98 | -1.76 | -  |
|          | 1.56       | -3.21      | -2.37 | -2.15 | -3.21 | -2.76 | -1.51 |       |       |    |
| GENE60X  | 15769_at   | 15769_at   | 1     | -0.9  | -1.02 | -1.95 | -1.9  | -1.02 | -2.8  | -  |
|          | 2.68       | -3.34      | -2.8  | -1.79 | -3.12 | -2.8  | -1.84 |       |       |    |
| GENE59X  | 17642_at   | 17642_at   | 1     | -2.12 | -1.22 | -1.92 | -1.88 | -0.94 | -2.92 | -2 |
|          | -3.48      | -2.44      | -2.12 | -3.22 | -2.92 | -1.96 |       |       |       |    |
| GENE62X  | 17060_s_at | 17060_s_at | 1     | -1.93 | -1    | -1.7  | -1.2  | -1.19 | -2.76 | -  |
|          | 2.2        | -2.41      | -3.22 | -2.2  | -2.41 | -2.9  | -1.16 |       |       |    |
| GENE61X  | 18723_at   | 18723_at   | 1     | -1.61 | -1.67 | -2.1  | -1.79 | -2    | -3.58 | -2 |
|          | -3.67      | -3.58      | -3.37 | -3.67 | -3.58 | -1.45 |       |       |       |    |
| GENE637X | 18308_i_at | 18308_i_at | 1     | -0.65 | -0.52 | -0.53 | -0.3  | -0.3  | -0.88 | -  |
|          | 1.1        | -0.4       | -0.72 | -0.28 | -0.75 | -1.06 | -0.32 |       |       |    |

|          |            |            |       |       |       |       |       |       |       |    |
|----------|------------|------------|-------|-------|-------|-------|-------|-------|-------|----|
| GENE161X | 16196_at   | 16196_at   | 1     | -0.8  | -0.56 | -0.95 | -1.05 | -0.78 | -0.39 | -  |
|          | 1.41       | -1.25      | -1.49 | -0.71 | -1.19 | -1.95 | -0.39 |       |       |    |
| GENE160X | 13286_s_at | 13286_s_at | 1     | -0.59 | -0.65 | -0.68 | -1.21 | -0.56 | -1.04 | -  |
|          | 1.36       | -1.42      | -2.21 | -0.68 | -1.3  | -2.45 | -0.35 |       |       |    |
| GENE645X | 20008_at   | 20008_at   | 1     | -0.51 | -0.08 | -0.44 | -0.84 | -0.08 | -0.59 | -  |
|          | 0.77       | -0.62      | -1.08 | -0.89 | -0.58 | -1.35 | -0.95 |       |       |    |
| GENE644X | 16682_at   | 16682_at   | 1     | -1.02 | -0.33 | -0.87 | -1.13 | -0.37 | -0.75 | -  |
|          | 1.37       | -1.26      | -1.75 | -1.51 | -1.26 | -2    | -1.62 |       |       |    |
| GENE643X | 15081_at   | 15081_at   | 1     | -0.39 | 0     | -0.59 | -0.5  | 0     | -0.81 | -  |
|          | 0.84       | -0.52      | -1.22 | -0.89 | -0.9  | -1.51 | -1    |       |       |    |
| GENE642X | 16642_s_at | 16642_s_at | 1     | -0.67 | 0.05  | -1.02 | -0.94 | -0.2  | -1.06 | -  |
|          | 0.89       | -1.04      | -1.64 | -0.98 | -1.1  | -2.2  | -1.59 |       |       |    |
| GENE624X | 19192_at   | 19192_at   | 1     | -0.64 | 0.02  | -0.64 | -0.36 | -0.17 | -0.92 | -1 |
|          | -0.88      | -1.56      | -1.27 | -0.88 | -2.15 | -0.6  |       |       |       |    |
| GENE286X | 19932_at   | 19932_at   | 1     | -0.86 | -0.39 | -0.51 | -0.88 | -0.58 | -1.02 | -  |
|          | 1.3        | -1.18      | -1.61 | -0.77 | -1.14 | -1.9  | -0.98 |       |       |    |
| GENE284X | 19933_g_at | 19933_g_at | 1     | -0.68 | -0.31 | -0.36 | -0.54 | -0.72 | -0.74 | -  |
|          | 1.22       | -1.1       | -1.67 | -0.83 | -1.2  | -1.74 | -0.75 |       |       |    |
| GENE282X | 11991_g_at | 11991_g_at | 1     | -0.85 | -0.27 | -0.66 | -0.7  | -0.65 | -1.3  | -  |
|          | 1.43       | -1.38      | -1.79 | -1.15 | -1.82 | -2.33 | -1.22 |       |       |    |
| GENE281X | 18331_s_at | 18331_s_at | 1     | -1.33 | -0.17 | -0.88 | -1.37 | -0.61 | -1.59 | -  |
|          | 1.82       | -1.88      | -2.44 | -1.7  | -2.33 | -3.55 | -1.72 |       |       |    |
| GENE280X | 14416_at   | 14416_at   | 1     | -0.95 | -0.35 | -1.14 | -1.14 | -0.45 | -1.23 | -  |
|          | 1.8        | -2.23      | -2.61 | -1.99 | -2.28 | -3.25 | -2.05 |       |       |    |
| GENE279X | 14369_at   | 14369_at   | 1     | -1.02 | -0.41 | -1.06 | -1.26 | -0.42 | -1.12 | -  |
|          | 1.86       | -2.19      | -2.58 | -1.79 | -2.44 | -3.54 | -1.67 |       |       |    |
| GENE278X | 13082_at   | 13082_at   | 1     | -1.2  | -0.18 | -0.84 | -1.5  | -0.56 | -1    | -  |
|          | 2.04       | -2.08      | -2.84 | -1.4  | -2.76 | -2.84 | -1.75 |       |       |    |
| GENE277X | 16286_at   | 16286_at   | 1     | -1.51 | -0.2  | -1.16 | -1.31 | -0.51 | -1.65 | -  |
|          | 1.96       | -2.26      | -3.23 | -1.82 | -2.88 | -3.4  | -1.83 |       |       |    |
| GENE283X | 15459_s_at | 15459_s_at | 1     | -1.03 | -0.34 | -0.93 | -1.25 | -1.75 | -1.51 | -  |
|          | 1.8        | -2         | -2.67 | -1.72 | -2.23 | -3.48 | -1.82 |       |       |    |
| GENE268X | 15689_at   | 15689_at   | 1     | -0.89 | -0.38 | -0.76 | -0.57 | -1.04 | -0.74 | -  |
|          | 1.19       | -1.56      | -1.68 | -0.84 | -1.52 | -1.96 | -1.59 |       |       |    |
| GENE623X | 18769_at   | 18769_at   | 1     | -0.74 | -0.31 | -1.1  | -0.54 | -0.37 | -0.73 | -1 |
|          | -1         | -1.79      | -1.27 | -1.26 | -2.12 | -0.9  |       |       |       |    |
| GENE134X | 15478_at   | 15478_at   | 1     | -0.45 | -0.25 | -0.58 | -0.39 | -0.3  | -0.55 | -  |
|          | 0.93       | -0.75      | -0.96 | -0.57 | -0.89 | -1.19 | -0.6  |       |       |    |
| GENE133X | 12955_at   | 12955_at   | 1     | -0.7  | -0.5  | -0.87 | -0.67 | -0.39 | -0.77 | -  |
|          | 1.06       | -0.9       | -1.35 | -0.94 | -0.95 | -1.64 | -1.04 |       |       |    |
| GENE110X | 19749_at   | 19749_at   | 1     | -1.7  | -0.63 | -2.07 | -1.18 | -0.9  | -1.51 | -  |
|          | 1.9        | -2.42      | -2.43 | -1.52 | -2.76 | -4.27 | -1.73 |       |       |    |
| GENE285X | 16693_at   | 16693_at   | 1     | -1.1  | -0.51 | -0.95 | -1.05 | -0.85 | -2    | -  |
|          | 1.33       | -1.85      | -2.73 | -1.27 | -1.85 | -3.1  | -1.69 |       |       |    |
| GENE112X | 15599_s_at | 15599_s_at | 1     | -0.41 | -0.21 | -0.46 | -0.35 | -0.5  | -0.59 | -  |
|          | 0.5        | -0.69      | -0.99 | -0.46 | -1    | -1.45 | -0.72 |       |       |    |
| GENE111X | 14843_at   | 14843_at   | 1     | -0.84 | -0.89 | -0.72 | -0.61 | -0.54 | -1.04 | -  |
|          | 1.05       | -1.34      | -1.98 | -0.84 | -1.6  | -2.88 | -1.27 |       |       |    |
| GENE150X | 20688_at   | 20688_at   | 1     | -0.31 | -0.49 | -0.67 | -0.31 | -0.44 | -0.73 | -  |
|          | 1.04       | -1.01      | -1.3  | -0.44 | -0.87 | -1.35 | -1.01 |       |       |    |
| GENE149X | 13124_at   | 13124_at   | 1     | -0.74 | -0.57 | -0.69 | -0.66 | -0.47 | -0.73 | -  |
|          | 1.32       | -1.42      | -1.86 | -0.85 | -1.33 | -2.44 | -1.9  |       |       |    |
| GENE148X | 13829_at   | 13829_at   | 1     | -0.31 | -0.36 | -0.72 | -0.34 | -0.45 | -0.58 | -  |
|          | 0.5        | -1.21      | -1.38 | -0.69 | -1.09 | -1.34 | -1.05 |       |       |    |
| GENE147X | 17596_at   | 17596_at   | 1     | -1.04 | -0.66 | -1.01 | -1    | -0.69 | -0.84 | -  |
|          | 1.21       | -2.32      | -2.62 | -0.97 | -2.32 | -2.76 | -2.19 |       |       |    |

|           |            |            |       |       |       |       |       |       |       |   |
|-----------|------------|------------|-------|-------|-------|-------|-------|-------|-------|---|
| GENE146X  | 19994_at   | 19994_at   | 1     | -0.51 | -0.35 | -0.92 | -0.47 | -0.33 | -0.95 | - |
| 0.84      | -1.63      | -2.21      | -0.87 | -1.49 | -2.33 | -1.52 |       |       |       |   |
| GENE145X  | 20066_at   | 20066_at   | 1     | -0.33 | -0.31 | -0.87 | -0.62 | -0.43 | -0.87 | - |
| 0.92      | -1.63      | -2.13      | -0.82 | -1.88 | -2.46 | -1.47 |       |       |       |   |
| GENE144X  | 18297_at   | 18297_at   | 1     | -0.43 | -0.29 | -0.84 | -0.35 | -0.29 | -0.74 | - |
| 1.01      | -1.35      | -1.54      | -0.77 | -1.58 | -1.67 | -1.37 |       |       |       |   |
| GENE143X  | 13905_at   | 13905_at   | 1     | -0.61 | -0.45 | -0.83 | -0.59 | -0.35 | -0.68 | - |
| 1.17      | -1.68      | -1.79      | -1.27 | -1.65 | -2.13 | -1.46 |       |       |       |   |
| GENE142X  | 19558_at   | 19558_at   | 1     | -0.94 | -0.96 | -1.52 | -1.48 | -0.78 | -1.61 | - |
| 2.02      | -2.88      | -3.52      | -1.86 | -3.04 | -4.2  | -3.13 |       |       |       |   |
| GENE155X  | 13644_at   | 13644_at   | 1     | -0.48 | -0.44 | -0.5  | -1.17 | -0.39 | -0.52 | - |
| 1.03      | -1.25      | -1.68      | -1.53 | -1.39 | -2.44 | -1.52 |       |       |       |   |
| GENE154X  | 20062_at   | 20062_at   | 1     | -0.27 | -0.4  | -0.38 | -1.11 | -0.26 | -0.6  | - |
| 1.05      | -0.92      | -1.6       | -1.37 | -1.48 | -2.19 | -0.87 |       |       |       |   |
| GENE153X  | 19422_at   | 19422_at   | 1     | -0.27 | -0.58 | -0.44 | -0.36 | -0.16 | -0.19 | - |
| 0.79      | -1.36      | -1.82      | -0.94 | -1.26 | -1.89 | -0.96 |       |       |       |   |
| GENE152X  | 14429_at   | 14429_at   | 1     | -0.69 | -0.76 | -0.77 | -0.86 | -0.27 | -0.86 | - |
| 1.51      | -2.39      | -3.32      | -1.15 | -2.51 | -3.58 | -1.32 |       |       |       |   |
| GENE151X  | 19494_at   | 19494_at   | 1     | -1.46 | -0.37 | -0.33 | -1.46 | -0.32 | -0.72 | - |
| 1.64      | -2.7       | -3.76      | -2.09 | -2.56 | -3.76 | -2.25 |       |       |       |   |
| GENE1039X | 15066_at   | 15066_at   | 1     | -0.68 | -0.45 | -0.77 | -1    | -0.34 | -0.36 | - |
| 1.45      | -1.26      | -1.26      | -1.04 | -1.61 | -1.48 | -0.84 |       |       |       |   |
| GENE1038X | 17536_at   | 17536_at   | 1     | -0.85 | -0.77 | -1.11 | -1.15 | -0.58 | -0.95 | - |
| 1.66      | -2.05      | -1.5       | -1.74 | -2.47 | -1.8  | -0.88 |       |       |       |   |
| GENE1037X | 12811_at   | 12811_at   | 1     | -0.63 | -0.29 | -0.36 | -0.58 | -0.37 | -0.53 | - |
| 1.09      | -0.95      | -0.97      | -0.85 | -1.35 | -1.36 | -0.64 |       |       |       |   |
| GENE1036X | 20024_s_at | 20024_s_at | 1     | -0.67 | -0.72 | -0.56 | -0.78 | -0.66 | -0.84 | - |
| 1.38      | -1.58      | -1.44      | -1.29 | -2.04 | -1.97 | -1.01 |       |       |       |   |
| GENE1035X | 16242_at   | 16242_at   | 1     | -1.28 | -0.95 | -0.87 | -1.24 | -0.77 | -1.15 | - |
| 1.61      | -1.93      | -1.5       | -1.52 | -2.49 | -2.21 | -1.01 |       |       |       |   |
| GENE1034X | 18369_at   | 18369_at   | 1     | -1.56 | -0.73 | -0.82 | -1.42 | -0.73 | -1.3  | - |
| 2.15      | -2.18      | -1.85      | -1.79 | -2.78 | -2.38 | -1.54 |       |       |       |   |
| GENE55X   | 18800_at   | 18800_at   | 1     | -1.56 | -1.53 | -1.69 | -1.01 | -0.37 | -0.62 | - |
| 1.79      | -2.53      | -2.15      | -1.51 | -2.11 | -2.82 | -1.28 |       |       |       |   |
| GENE1026X | 16631_s_at | 16631_s_at | 1     | -1.01 | -0.41 | -0.59 | -0.9  | -0.39 | -0.97 | - |
| 1.36      | -1.75      | -1.97      | -0.96 | -1.75 | -2.4  | -0.87 |       |       |       |   |
| GENE1025X | 13700_at   | 13700_at   | 1     | -1.58 | -0.56 | -0.64 | -1.38 | -0.8  | -1.71 | - |
| 2.39      | -3.08      | -2.58      | -1.85 | -3.52 | -3.71 | -1.18 |       |       |       |   |
| GENE66X   | 17183_s_at | 17183_s_at | 1     | -0.64 | -0.28 | -0.69 | -0.39 | -0.41 | -0.72 | - |
| 0.84      | -1.36      | -1.33      | -0.74 | -1.31 | -1.33 | -0.47 |       |       |       |   |
| GENE65X   | 16860_at   | 16860_at   | 1     | -0.76 | -0.54 | -0.87 | -0.82 | -0.3  | -0.82 | - |
| 1.27      | -1.58      | -1.82      | -1.27 | -1.76 | -1.9  | -0.81 |       |       |       |   |
| GENE58X   | 18806_at   | 18806_at   | 1     | -0.44 | -0.28 | -0.44 | -0.17 | -0.29 | -0.57 | - |
| 0.81      | -0.93      | -0.87      | -0.42 | -0.71 | -1.01 | -0.24 |       |       |       |   |
| GENE57X   | 16674_at   | 16674_at   | 1     | -0.83 | -0.58 | -0.35 | -0.33 | -0.44 | -0.71 | - |
| 1.02      | -0.94      | -0.82      | -0.56 | -1.32 | -1.09 | -0.4  |       |       |       |   |
| GENE56X   | 16986_at   | 16986_at   | 1     | -1.53 | -0.62 | -1.15 | -0.45 | -0.34 | -1    | - |
| 1.64      | -1.66      | -1.2       | -0.96 | -1.74 | -1.81 | -1.16 |       |       |       |   |
| GENE276X  | 12964_at   | 12964_at   | 1     | -0.99 | -0.62 | -0.54 | -0.59 | -0.61 | -0.98 | - |
| 0.93      | -0.96      | -0.86      | -0.98 | -1.39 | -1.44 | -1.14 |       |       |       |   |
| GENE275X  | 15849_at   | 15849_at   | 1     | -1.45 | -0.79 | -1.58 | -1.04 | -0.79 | -1.91 | - |
| 1.74      | -1.74      | -1.58      | -1.69 | -2.46 | -2.63 | -1.85 |       |       |       |   |
| GENE274X  | 16081_s_at | 16081_s_at | 1     | -1.49 | -0.57 | -1.07 | -1.15 | -1.47 | -1.5  | - |
| 1.82      | -1.5       | -1.56      | -1.13 | -1.95 | -2.66 | -2.06 |       |       |       |   |
| GENE273X  | 14045_at   | 14045_at   | 1     | -0.59 | -0.33 | -0.84 | -0.55 | -0.51 | -0.94 | - |
| 1.08      | -0.94      | -1.25      | -0.84 | -1.66 | -2.25 | -1.7  |       |       |       |   |



|          |            |            |       |       |       |       |       |       |       |    |
|----------|------------|------------|-------|-------|-------|-------|-------|-------|-------|----|
| GENE272X | 18689_s_at | 18689_s_at | 1     | -1    | -0.57 | -0.75 | -0.98 | -0.9  | -1.27 | -  |
| 0.94     | -1.23      | -1.51      | -0.65 | -1.8  | -2.45 | -1.88 |       |       |       |    |
| GENE271X | 13613_at   | 13613_at   | 1     | -0.65 | -0.22 | -0.53 | -0.47 | -0.61 | -0.8  | -  |
| 0.95     | -1.46      | -1.02      | -0.58 | -1.64 | -2.02 | -1.23 |       |       |       |    |
| GENE270X | 13548_at   | 13548_at   | 1     | -1.11 | -0.33 | -0.5  | -0.83 | -0.77 | -1.3  | -  |
| 1.46     | -1.36      | -1.36      | -0.49 | -1.87 | -2.25 | -1.45 |       |       |       |    |
| GENE269X | 15100_f_at | 15100_f_at | 1     | -1.43 | -0.48 | -1.07 | -0.89 | -1.11 | -1.8  | -  |
| 1.67     | -2.12      | -1.86      | -1.01 | -2.5  | -3.09 | -2.4  |       |       |       |    |
| GENE141X | 18416_at   | 18416_at   | 1     | -0.69 | -1.26 | -1.24 | -0.97 | -0.94 | -1.54 | -  |
| 1.76     | -2.42      | -2.58      | -2.01 | -2.6  | -3.83 | -2.1  |       |       |       |    |
| GENE140X | 20273_at   | 20273_at   | 1     | -0.73 | -0.93 | -1.27 | -0.79 | -0.74 | -1.4  | -  |
| 1.4      | -2.26      | -2.68      | -1.53 | -2.48 | -3.11 | -1.83 |       |       |       |    |
| GENE139X | 12122_at   | 12122_at   | 1     | -0.73 | -0.83 | -1.06 | -1.11 | -0.85 | -1.72 | -  |
| 1.48     | -2.51      | -2.94      | -1.38 | -2.63 | -3.4  | -2.13 |       |       |       |    |
| GENE132X | 20197_at   | 20197_at   | 1     | -1.11 | -1.03 | -1.49 | -0.82 | -0.94 | -1.23 | -  |
| 1.96     | -2.35      | -2.74      | -1.53 | -2.03 | -2.9  | -2.06 |       |       |       |    |
| GENE131X | 14020_i_at | 14020_i_at | 1     | -1.33 | -0.84 | -1.15 | -1.22 | -0.8  | -1.35 | -  |
| 1.57     | -2.51      | -2.98      | -1.6  | -2.43 | -3.01 | -2.01 |       |       |       |    |
| GENE130X | 15837_at   | 15837_at   | 1     | -1.46 | -1.38 | -1.64 | -1.4  | -1.07 | -1.69 | -  |
| 2.5      | -3.57      | -3.55      | -2.04 | -3.35 | -4.01 | -2.32 |       |       |       |    |
| GENE124X | 14590_at   | 14590_at   | 1     | -0.56 | -0.77 | -1.05 | -0.8  | -0.66 | -1.19 | -  |
| 0.95     | -1.28      | -2.01      | -0.77 | -1.81 | -2.15 | -1.18 |       |       |       |    |
| GENE123X | 13353_at   | 13353_at   | 1     | -0.74 | -0.84 | -1.7  | -1.27 | -0.88 | -1.61 | -  |
| 1.83     | -1.97      | -2.61      | -1.22 | -2.27 | -3.29 | -2.35 |       |       |       |    |
| GENE122X | 14961_at   | 14961_at   | 1     | -1.09 | -1.11 | -2.07 | -1.93 | -0.92 | -2.07 | -  |
| 1.76     | -2.32      | -3.73      | -2.2  | -3.32 | -4    | -2.97 |       |       |       |    |
| GENE126X | 20204_at   | 20204_at   | 1     | -0.43 | -0.64 | -0.74 | -0.79 | -0.56 | -1.1  | -  |
| 1.17     | -1.38      | -1.43      | -1.01 | -1.58 | -1.98 | -1.69 |       |       |       |    |
| GENE125X | 13903_at   | 13903_at   | 1     | -1.68 | -1.56 | -1.33 | -1.96 | -0.58 | -2.24 | -  |
| 2.49     | -2.85      | -2.89      | -1.7  | -2.69 | -4.09 | -2.61 |       |       |       |    |
| GENE88X  | 13180_s_at | 13180_s_at | 1     | -0.59 | -0.72 | -1.29 | -0.97 | -0.65 | -1.16 | -  |
| 0.87     | -1.9       | -1.82      | -1.03 | -2.36 | -2.37 | -1    |       |       |       |    |
| GENE9X   | 17568_at   | 17568_at   | 1     | -1.02 | -0.74 | -1.52 | -1.28 | -0.88 | -1.54 | -  |
| 1.27     | -2.03      | -2.09      | -1.29 | -2.39 | -2.56 | -1.53 |       |       |       |    |
| GENE10X  | 12784_at   | 12784_at   | 1     | -0.76 | -0.92 | -1.53 | -1.31 | -0.98 | -2.06 | -  |
| 1.48     | -2.26      | -2.23      | -0.95 | -2.49 | -3.11 | -1.2  |       |       |       |    |
| GENE11X  | 17294_at   | 17294_at   | 1     | -0.53 | -1.18 | -1.02 | -0.93 | -0.64 | -1.45 | -1 |
| -1.83    | -1.61      | -0.69      | -1.47 | -2.19 | -1.33 |       |       |       |       |    |
| GENE18X  | 19232_at   | 19232_at   | 1     | -1.14 | -1.24 | -1.8  | -1.34 | -1.48 | -2.12 | -  |
| 2.48     | -3.59      | -3.12      | -2.07 | -3.59 | -4.12 | -2.75 |       |       |       |    |
| GENE8X   | 12910_s_at | 12910_s_at | 1     | -1.13 | -0.93 | -1.7  | -1.06 | -1.21 | -2.24 | -  |
| 1.99     | -2.8       | -2.7       | -1.61 | -2.71 | -3.45 | -1.94 |       |       |       |    |
| GENE7X   | 18656_at   | 18656_at   | 1     | -1.25 | -1.32 | -2.15 | -1.48 | -1.35 | -2.61 | -  |
| 2.44     | -3.14      | -3.15      | -2.09 | -3.52 | -4.29 | -2.85 |       |       |       |    |
| GENE5X   | 18579_at   | 18579_at   | 1     | -1.53 | -1.75 | -2.29 | -1.26 | -1.32 | -2    | -  |
| 2.09     | -3.65      | -2.56      | -1.46 | -3.2  | -3.51 | -2.7  |       |       |       |    |
| GENE4X   | 19017_at   | 19017_at   | 1     | -1.43 | -2.06 | -3.55 | -1.8  | -1.89 | -3.09 | -  |
| 2.56     | -4.02      | -3.7       | -2.31 | -4.27 | -4.24 | -3.21 |       |       |       |    |
| GENE159X | 18353_at   | 18353_at   | 1     | -0.31 | -0.13 | -0.44 | -0.14 | -0.27 | -0.49 | -  |
| 0.72     | -0.87      | -0.78      | -0.53 | -1.07 | -1.49 | -0.3  |       |       |       |    |
| GENE158X | 18722_s_at | 18722_s_at | 1     | -0.45 | -0.44 | -0.7  | -0.45 | -0.6  | -0.73 | -  |
| 0.77     | -1.18      | -1.31      | -0.66 | -1.52 | -2.45 | -0.41 |       |       |       |    |
| GENE157X | 16210_at   | 16210_at   | 1     | -1.07 | -0.3  | -0.73 | -1.02 | 0     | -1.44 | -  |
| 1.42     | -1.3       | -2.1       | -0.92 | -1.92 | -3.1  | -0.75 |       |       |       |    |
| GENE156X | 13601_at   | 13601_at   | 1     | -0.94 | -0.24 | -0.75 | -1    | -0.29 | -1.54 | -  |
| 1.49     | -1.11      | -1.77      | -1    | -2.44 | -2.7  | -0.49 |       |       |       |    |

|          |            |            |       |       |       |       |       |       |       |   |
|----------|------------|------------|-------|-------|-------|-------|-------|-------|-------|---|
| GENE114X | 19447_s_at | 19447_s_at | 1     | -0.87 | -0.38 | -0.95 | -0.32 | -0.08 | -0.93 | - |
| 1.6      | -1.71      | -1.54      | -0.95 | -2.01 | -2.29 | -1.16 |       |       |       |   |
| GENE97X  | 15553_at   | 15553_at   | 1     | -0.83 | -0.74 | -0.89 | -0.7  | -0.09 | -1.11 | - |
| 1.36     | -1.87      | -1.7       | -1.3  | -2.51 | -3.33 | -1.89 |       |       |       |   |
| GENE101X | 12098_at   | 12098_at   | 1     | -0.25 | -0.18 | -0.44 | -0.28 | -0.47 | -0.76 | - |
| 0.77     | -1         | -1.23      | -0.77 | -1.49 | -1.74 | -0.88 |       |       |       |   |
| GENE100X | 15595_s_at | 15595_s_at | 1     | -0.45 | -0.12 | -0.45 | -0.39 | -0.45 | -0.75 | - |
| 0.82     | -1.41      | -1.53      | -0.8  | -1.87 | -2    | -1.05 |       |       |       |   |
| GENE99X  | 13161_at   | 13161_at   | 1     | -0.94 | -0.17 | -0.91 | -0.92 | -0.6  | -1.41 | - |
| 1.69     | -2.18      | -2.7       | -1.65 | -3.35 | -3.53 | -2.14 |       |       |       |   |
| GENE98X  | 20684_at   | 20684_at   | 1     | -0.73 | -0.39 | -0.73 | -0.28 | -0.61 | -0.6  | - |
| 1.39     | -1.61      | -1.73      | -1.05 | -2.53 | -2.73 | -1.4  |       |       |       |   |
| GENE96X  | 20154_at   | 20154_at   | 1     | -0.57 | -0.16 | -1    | -0.45 | 0.09  | -0.71 | - |
| 1.08     | -1         | -1.8       | -1.19 | -2.48 | -2.48 | -1.02 |       |       |       |   |
| GENE120X | 17471_at   | 17471_at   | 1     | -0.39 | -0.31 | -0.67 | -0.63 | -0.29 | -0.82 | - |
| 0.81     | -1.17      | -1.1       | -0.55 | -1.34 | -1.41 | -0.85 |       |       |       |   |
| GENE119X | 15471_at   | 15471_at   | 1     | -0.51 | -0.36 | -0.95 | -0.61 | -0.36 | -1    | - |
| 1.22     | -1.4       | -1.38      | -0.84 | -1.9  | -1.58 | -1.09 |       |       |       |   |
| GENE118X | 13044_at   | 13044_at   | 1     | -0.59 | -0.43 | -1.34 | -0.67 | -0.41 | -1.24 | - |
| 1.27     | -2         | -2         | -1.51 | -2.07 | -2.44 | -1.57 |       |       |       |   |
| GENE117X | 19086_at   | 19086_at   | 1     | -0.95 | -0.49 | -1.49 | -1.15 | -0.45 | -2.07 | - |
| 2.1      | -3.11      | -3.07      | -2    | -3.11 | -3.56 | -1.86 |       |       |       |   |
| GENE116X | 18223_at   | 18223_at   | 1     | -0.45 | 0.02  | -0.54 | -0.5  | -0.21 | -0.85 | - |
| 0.76     | -1.08      | -1.17      | -0.8  | -1.52 | -1.57 | -1.02 |       |       |       |   |
| GENE115X | 15092_at   | 15092_at   | 1     | -1.54 | -0.22 | -1.39 | -1.38 | -0.45 | -1.85 | - |
| 2.02     | -2.61      | -2.68      | -1.73 | -3.45 | -3.53 | -2.22 |       |       |       |   |
| GENE107X | 19197_at   | 19197_at   | 1     | -0.82 | -0.16 | -1.75 | -1.15 | -0.35 | -2.2  | - |
| 1.67     | -2.94      | -2.65      | -1.49 | -3.77 | -4.27 | -2.33 |       |       |       |   |
| GENE106X | 19358_at   | 19358_at   | 1     | -0.34 | -0.37 | -0.58 | -0.62 | -0.41 | -1.28 | - |
| 1.12     | -1.44      | -1.88      | -0.76 | -1.74 | -2.21 | -1.44 |       |       |       |   |
| GENE105X | 15422_at   | 15422_at   | 1     | -1.13 | -0.82 | -1.14 | -1.09 | -0.72 | -2.25 | - |
| 1.87     | -2.83      | -3.27      | -1.38 | -3.14 | -4.27 | -2.23 |       |       |       |   |
| GENE104X | 16595_s_at | 16595_s_at | 1     | -1.08 | -0.34 | -1.1  | -1.13 | -0.92 | -2.36 | - |
| 1.82     | -1.89      | -2.48      | -1.34 | -2.63 | -3.28 | -2.39 |       |       |       |   |
| GENE103X | 17439_g_at | 17439_g_at | 1     | -0.79 | -0.2  | -0.57 | -0.73 | -0.32 | -1.54 | - |
| 1.58     | -1.7       | -1.9       | -0.96 | -2.51 | -2.71 | -1.93 |       |       |       |   |
| GENE102X | 16110_s_at | 16110_s_at | 1     | -0.74 | -0.11 | -0.62 | -0.8  | -0.56 | -1.87 | - |
| 1.57     | -1.89      | -2         | -1.31 | -2.81 | -3.12 | -1.94 |       |       |       |   |
| GENE95X  | 13904_s_at | 13904_s_at | 1     | -0.27 | -0.31 | -0.51 | -0.52 | -0.11 | -0.56 | - |
| 0.8      | -1.09      | -1.32      | -0.79 | -1.18 | -1.69 | -0.63 |       |       |       |   |
| GENE94X  | 13614_at   | 13614_at   | 1     | -0.92 | -0.5  | -1.29 | -1.26 | -0.65 | -1.08 | - |
| 1.73     | -2.04      | -2.7       | -1.81 | -2.5  | -3.56 | -0.96 |       |       |       |   |
| GENE93X  | 18580_at   | 18580_at   | 1     | -0.56 | -0.53 | -0.92 | -0.67 | -0.48 | -0.77 | - |
| 1.02     | -1.59      | -1.66      | -0.9  | -1.54 | -1.89 | -0.65 |       |       |       |   |
| GENE92X  | 13547_at   | 13547_at   | 1     | -1.27 | -1.1  | -2.07 | -2.08 | -1.49 | -2.62 | - |
| 2.68     | -4.53      | -5.38      | -2.35 | -5.02 | -6.23 | -2.01 |       |       |       |   |
| GENE91X  | 12102_at   | 12102_at   | 1     | -0.24 | -0.2  | -0.55 | -0.72 | -0.4  | -1.1  | - |
| 1.07     | -1.57      | -1.42      | -0.95 | -1.89 | -1.92 | -0.84 |       |       |       |   |
| GENE90X  | 15676_at   | 15676_at   | 1     | -0.68 | -0.21 | -0.83 | -1.04 | -0.44 | -1.22 | - |
| 1.23     | -1.67      | -1.9       | -1.48 | -2.39 | -2.5  | -0.74 |       |       |       |   |
| GENE89X  | 16650_s_at | 16650_s_at | 1     | -0.48 | -0.21 | -1.22 | -0.88 | -0.22 | -1.41 | - |
| 1.23     | -2.01      | -2.23      | -1.52 | -2.89 | -2.67 | -0.96 |       |       |       |   |
| GENE84X  | 17286_at   | 17286_at   | 1     | -0.44 | -0.12 | -0.82 | -0.69 | -0.07 | -0.89 | - |
| 1.12     | -2.02      | -2.47      | -1.42 | -2.12 | -2.7  | -1.27 |       |       |       |   |
| GENE83X  | 14528_at   | 14528_at   | 1     | -0.57 | -0.29 | -0.92 | -0.67 | -0.2  | -0.94 | - |
| 1.23     | -1.71      | -2.1       | -1.34 | -2.27 | -2.55 | -1.34 |       |       |       |   |

|         |            |            |       |       |       |       |       |       |       |    |
|---------|------------|------------|-------|-------|-------|-------|-------|-------|-------|----|
| GENE82X | 12614_at   | 12614_at   | 1     | -0.55 | -0.67 | -0.97 | -1.23 | -0.92 | -1.15 | -  |
|         | 1.23       | -2.56      | -3.29 | -1.58 | -3.07 | -3.29 | -1.72 |       |       |    |
| GENE87X | 16120_at   | 16120_at   | 1     | -0.96 | -0.58 | -1.83 | -1.01 | -0.94 | -2.12 | -  |
|         | 1.64       | -2.81      | -3.17 | -1.61 | -3.53 | -3.25 | -1.89 |       |       |    |
| GENE86X | 14542_i_at | 14542_i_at | 1     | -0.66 | -0.76 | -1.73 | -1.37 | -0.94 | -1.68 | -  |
|         | 1.17       | -2.6       | -3.1  | -1.8  | -3.86 | -3.36 | -2.08 |       |       |    |
| GENE85X | 14509_g_at | 14509_g_at | 1     | -0.76 | -0.78 | -2.19 | -1.28 | -0.81 | -1.52 | -2 |
|         | -2.4       | -3.65      | -2.22 | -3.62 | -3.48 | -1.7  |       |       |       |    |
| GENE81X | 12649_at   | 12649_at   | 1     | -0.53 | -0.24 | -1.93 | -0.93 | -0.19 | -1.43 | -  |
|         | 1.22       | -2.7       | -3.2  | -1.3  | -2.96 | -3.2  | -1.92 |       |       |    |
