# Supplementary material
Source: PubMed Central journal article supplement (PMC141204)
Supplement: plntcell_15_2_317__6.pdf [file plntcell_15_2_317__6.pdf]

| GID       | probeset_id | NAME       | GWEIGHT | Pst 3h | Pst/avrRpt2 3h | Pst/avrB 3h | Pst/avrRpt2 9h | Pst/avrB 9h | Pst/avrRpt2 9h | Pst/avrB 9h |
|-----------|-------------|------------|---------|--------|----------------|-------------|----------------|-------------|----------------|-------------|
| EWEIGHT   |             |            | 1       | 1      | 1              | 1           | 1              | 1           | 1              | 1           |
| GENE458X  | 13381_at    | 13381_at   | 1       | 0      | 0              | 0           | 0              | 2.8         | 4.47           | 0           |
|           | 4.36        | 4.26       |         |        |                |             |                |             |                |             |
| GENE2518X | 20247_at    | 20247_at   | 1       | 0      | 0              | 0.67        | 0              | 2.2         | 3.88           |             |
|           | 0.84        | 3.9        | 3.82    |        |                |             |                |             |                |             |
| GENE1918X | 18213_at    | 18213_at   | 1       | 0      | 0              | 0           | 0              | 3           | 3.4            |             |
|           | 0.84        | 3.03       | 3.26    |        |                |             |                |             |                |             |
| GENE1592X | 17041_s_at  | 17041_s_at | 1       | -0.28  | -0.31          | -0.54       | 0.49           | 1.21        | 2.51           |             |
|           | 0.58        | 2.06       | 1.57    |        |                |             |                |             |                |             |
| GENE2608X | 20511_at    | 20511_at   | 1       | -0.17  | -0.06          | -0.37       | 0.63           | 1.43        | 1.54           |             |
|           | 0.51        | 1.55       | 1.48    |        |                |             |                |             |                |             |
| GENE2380X | 19881_at    | 19881_at   | 1       | 0.01   | -0.12          | -0.1        | 0.27           | 1.16        | 1.23           |             |
|           | 0.41        | 1.27       | 1.1     |        |                |             |                |             |                |             |
| GENE2156X | 18962_s_at  | 18962_s_at | 1       | -0.11  | -0.23          | -0.19       | 0.35           | 0.97        | 1.1            |             |
|           | 0.28        | 0.88       | 0.68    |        |                |             |                |             |                |             |
| GENE549X  | 13647_at    | 13647_at   | 1       | -0.43  | -0.27          | -0.05       | 0.35           | 1.15        | 1.26           |             |
|           | 0.55        | 1.38       | 1.01    |        |                |             |                |             |                |             |
| GENE1152X | 15660_s_at  | 15660_s_at | 1       | -0.12  | -0.2           | 0.1         | 0.7            | 1.02        | 1.29           |             |
|           | 0.6         | 0.98       | 1.62    |        |                |             |                |             |                |             |
| GENE1929X | 18234_at    | 18234_at   | 1       | -0.22  | -0.26          | 0.25        | 0.54           | 0.85        | 1.07           |             |
|           | 0.56        | 0.95       | 1.25    |        |                |             |                |             |                |             |
| GENE1016X | 15223_s_at  | 15223_s_at | 1       | 0      | 0              | 0.19        | 0.41           | 0.97        | 1.56           |             |
|           | 0.74        | 1.05       | 1.13    |        |                |             |                |             |                |             |
| GENE646X  | 14043_at    | 14043_at   | 1       | -0.33  | 0.04           | 0.18        | 0.6            | 0.96        | 1.58           |             |
|           | 0.51        | 1.02       | 1.02    |        |                |             |                |             |                |             |
| GENE891X  | 14978_at    | 14978_at   | 1       | 0.2    | 0.07           | 0.48        | 0.58           | 2.13        | 3.45           |             |
|           | 0.65        | 1.85       | 2.52    |        |                |             |                |             |                |             |
| GENE2508X | 20224_at    | 20224_at   | 1       | 0.05   | 0.23           | 0.09        | 0.48           | 1.76        | 2.92           |             |
|           | 0.29        | 1.51       | 2.34    |        |                |             |                |             |                |             |
| GENE2425X | 19988_at    | 19988_at   | 1       | 0.14   | -0.03          | -0.02       | 0.16           | 0.53        | 1.17           |             |
|           | 0.15        | 0.44       | 0.8     |        |                |             |                |             |                |             |
| GENE877X  | 14923_at    | 14923_at   | 1       | 0.2    | 0.08           | -0.34       | 0.27           | 1.52        | 2.06           |             |
|           | 0.18        | 0.78       | 1.37    |        |                |             |                |             |                |             |
| GENE2542X | 20305_at    | 20305_at   | 1       | -0.13  | -0.53          | -0.3        | 0.02           | 0.96        | 1.8            |             |
|           | 0.13        | 0.77       | 1.36    |        |                |             |                |             |                |             |
| GENE144X  | 12394_at    | 12394_at   | 1       | 0.4    | -0.37          | -0.25       | 0.2            | 0.73        | 1.72           |             |
|           | 0.4         | 0.87       | 1.13    |        |                |             |                |             |                |             |
| GENE2152X | 18953_at    | 18953_at   | 1       | 0.45   | -0.44          | -0.04       | 1.5            | 1.94        | 3.37           |             |
|           | 1.04        | 1.33       | 2.76    |        |                |             |                |             |                |             |
| GENE709X  | 14413_at    | 14413_at   | 1       | 0.02   | -0.11          | -0.3        | 0.68           | 0.65        | 1.27           |             |
|           | 0.43        | 0.07       | 0.94    |        |                |             |                |             |                |             |
| GENE2140X | 18930_at    | 18930_at   | 1       | -0.47  | -0.73          | -0.39       | -0.08          | 1.3         | 0.95           |             |
|           | 0.33        | 1.58       | 1.53    |        |                |             |                |             |                |             |
| GENE113X  | 12297_at    | 12297_at   | 1       | -0.32  | -0.53          | -0.45       | -0.07          | 1.37        | 0.95           |             |
|           | 0.29        | 1.67       | 0.95    |        |                |             |                |             |                |             |
| GENE2038X | 18601_s_at  | 18601_s_at | 1       | -0.53  | -0.56          | -0.54       | -0.29          | 1.18        | 0.76           |             |
|           | 0.24        | 0.96       | 0.7     |        |                |             |                |             |                |             |
| GENE350X  | 13110_at    | 13110_at   | 1       | -0.7   | -0.58          | -0.33       | 0.38           | 1.95        | 1.44           |             |
|           | 0.49        | 1.64       | 1.28    |        |                |             |                |             |                |             |
| GENE2324X | 19651_s_at  | 19651_s_at | 1       | -0.25  | -0.45          | -0.29       | 0.25           | 1.01        | 0.73           |             |
|           | 0.43        | 0.84       | 0.78    |        |                |             |                |             |                |             |
| GENE861X  | 14872_at    | 14872_at   | 1       | -0.29  | -0.41          | -0.35       | 0.23           | 1.49        | 1.12           |             |
|           | 0.92        | 1          | 0.92    |        |                |             |                |             |                |             |

|           |            |            |   |       |       |       |      |      |      |
|-----------|------------|------------|---|-------|-------|-------|------|------|------|
| GENE640X  | 14026_at   | 14026_at   | 1 | -0.4  | -0.4  | -0.35 | 0.47 | 1.7  | 1.09 |
| 0.92      | 1.58       | 0.77       |   |       |       |       |      |      |      |
| GENE1611X | 17096_s_at | 17096_s_at | 1 | -0.75 | -0.8  | -0.38 | 0.4  | 1.34 | 1.67 |
| 0.88      | 1.43       | 0.68       |   |       |       |       |      |      |      |
| GENE1263X | 16031_at   | 16031_at   | 1 | -0.99 | -1.62 | -1.24 | 0.87 | 2.07 | 1.28 |
| 0.36      | 1.67       | 0.83       |   |       |       |       |      |      |      |
| GENE1992X | 18421_at   | 18421_at   | 1 | -0.55 | -0.91 | -0.19 | 0.2  | 1.4  | 0.95 |
| 0.06      | 0.76       | 0.06       |   |       |       |       |      |      |      |
| GENE867X  | 14895_at   | 14895_at   | 1 | 0.37  | -0.17 | 0.18  | 0.46 | 1.2  | 0.95 |
| 0.7       | 1          | 0.78       |   |       |       |       |      |      |      |
| GENE812X  | 14660_at   | 14660_at   | 1 | 0.08  | 0.07  | 0     | 0.47 | 1.04 | 0.93 |
| 0.6       | 1.12       | 0.48       |   |       |       |       |      |      |      |
| GENE2047X | 18623_at   | 18623_at   | 1 | -0.06 | -0.1  | 0.09  | 0.89 | 2.37 | 1    |
| 0.99      | 1.96       | 0.75       |   |       |       |       |      |      |      |
| GENE1633X | 17192_s_at | 17192_s_at | 1 | -0.04 | -0.18 | 0.04  | 0.41 | 1.1  | 0.71 |
| 0.4       | 1.19       | 0.45       |   |       |       |       |      |      |      |
| GENE392X  | 13179_at   | 13179_at   | 1 | -0.02 | 0.37  | 0.12  | 0.9  | 2.16 | 0.85 |
| 1.64      | 2.36       | 1.43       |   |       |       |       |      |      |      |
| GENE1080X | 15487_at   | 15487_at   | 1 | 0.3   | 0.18  | 0.58  | 0.7  | 2    | 1.21 |
| 1.61      | 2.46       | 1.37       |   |       |       |       |      |      |      |
| GENE343X  | 13097_at   | 13097_at   | 1 | 0.26  | 0.14  | 0.2   | 0.62 | 1.19 | 0.55 |
| 0.56      | 1.3        | 0.74       |   |       |       |       |      |      |      |
| GENE1932X | 18242_g_at | 18242_g_at | 1 | -0.37 | -0.03 | 0     | 1    | 2.6  | 1.23 |
| 1.3       | 1.96       | 1.53       |   |       |       |       |      |      |      |
| GENE1738X | 17558_s_at | 17558_s_at | 1 | -0.24 | 0.15  | 0.34  | 0.58 | 1.43 | 0.8  |
| 0.77      | 0.92       | 0.6        |   |       |       |       |      |      |      |
| GENE2312X | 19624_at   | 19624_at   | 1 | -0.2  | 0.3   | 0.45  | 1.51 | 2.63 | 2.74 |
| 1.15      | 2.32       | 1.93       |   |       |       |       |      |      |      |
| GENE1269X | 16043_at   | 16043_at   | 1 | -0.41 | 0.76  | 0.35  | 2.08 | 3.45 | 3.07 |
| 0.91      | 2.17       | 1.56       |   |       |       |       |      |      |      |
| GENE911X  | 15034_at   | 15034_at   | 1 | 0.1   | -0.02 | 0.42  | 0.7  | 1.63 | 0.96 |
| 0.44      | 0.89       | 0.64       |   |       |       |       |      |      |      |
| GENE1770X | 17657_at   | 17657_at   | 1 | -0.41 | 0.23  | 0.65  | 0.64 | 2.21 | 1.72 |
| 1.19      | 1.39       | 0.29       |   |       |       |       |      |      |      |
| GENE355X  | 13117_at   | 13117_at   | 1 | 0.52  | 0.47  | 0.45  | 1.03 | 1.38 | 0.88 |
| 0.77      | 1.17       | 0.73       |   |       |       |       |      |      |      |
| GENE1494X | 16634_s_at | 16634_s_at | 1 | 0.56  | 0.16  | 0.5   | 0.86 | 1.72 | 0.96 |
| 0.94      | 0.93       | 0.72       |   |       |       |       |      |      |      |
| GENE2196X | 19149_at   | 19149_at   | 1 | 0.25  | 0.28  | 0.21  | 0.6  | 1.04 | 0.63 |
| 0.76      | 0.62       | 0.47       |   |       |       |       |      |      |      |
| GENE733X  | 14477_at   | 14477_at   | 1 | 0.14  | 0.15  | 0.01  | 0.57 | 1.15 | 0.64 |
| 0.7       | 0.65       | 0.28       |   |       |       |       |      |      |      |
| GENE2477X | 20151_at   | 20151_at   | 1 | -0.01 | 0.03  | 0.13  | 0.37 | 1.05 | 1.33 |
| 0.15      | 0.9        | 0.78       |   |       |       |       |      |      |      |
| GENE2664X | 20669_at   | 20669_at   | 1 | 0.37  | 0.18  | 0.32  | 0.95 | 2.08 | 2.09 |
| 0.31      | 1.57       | 1.14       |   |       |       |       |      |      |      |
| GENE348X  | 13106_at   | 13106_at   | 1 | 0.12  | 0.13  | 0.21  | 0.52 | 1.04 | 0.95 |
| 0.17      | 0.65       | 0.53       |   |       |       |       |      |      |      |
| GENE811X  | 14656_i_at | 14656_i_at | 1 | 0.28  | 0.19  | 0.19  | 0.8  | 2.8  | 2.32 |
| 0.26      | 1.88       | 1.07       |   |       |       |       |      |      |      |
| GENE1289X | 16071_s_at | 16071_s_at | 1 | 0.16  | 0.09  | 0.14  | 0.38 | 1.64 | 1.31 |
| 0.25      | 1.52       | 0.97       |   |       |       |       |      |      |      |
| GENE2494X | 20191_at   | 20191_at   | 1 | 0.18  | 0.11  | -0.01 | 0.34 | 1.03 | 0.69 |
| 0.23      | 0.68       | 0.66       |   |       |       |       |      |      |      |
| GENE2292X | 19489_s_at | 19489_s_at | 1 | -0.67 | 0     | -0.19 | 0.79 | 3.14 | 2.61 |
| 0.67      | 3.13       | 1.84       |   |       |       |       |      |      |      |

|           |            |            |      |       |       |       |       |      |      |
|-----------|------------|------------|------|-------|-------|-------|-------|------|------|
| GENE222X  | 12702_at   | 12702_at   | 1    | -0.43 | 0.33  | -0.05 | 0.88  | 3.13 | 1.94 |
|           | 0.88       | 2.48       | 1.58 |       |       |       |       |      |      |
| GENE202X  | 12600_at   | 12600_at   | 1    | -0.08 | 0.05  | -0.08 | 0.41  | 1.59 | 1.19 |
|           | 0.32       | 1.04       | 0.78 |       |       |       |       |      |      |
| GENE552X  | 13652_at   | 13652_at   | 1    | -0.17 | -0.09 | 0.12  | 0.23  | 1.02 | 0.63 |
|           | 0.23       | 0.72       | 0.52 |       |       |       |       |      |      |
| GENE2307X | 19596_at   | 19596_at   | 1    | 0.09  | -0.14 | -0.19 | 0.57  | 1.31 | 0.85 |
|           | 0.57       | 1.26       | 1.06 |       |       |       |       |      |      |
| GENE2217X | 19198_at   | 19198_at   | 1    | 0.06  | -0.09 | -0.33 | 0.28  | 1.09 | 0.73 |
|           | 0.38       | 1.04       | 0.93 |       |       |       |       |      |      |
| GENE10X   | 12006_at   | 12006_at   | 1    | 0.27  | -0.43 | -0.43 | 0.76  | 1.51 | 1.05 |
|           | 0.54       | 1.33       | 0.66 |       |       |       |       |      |      |
| GENE1808X | 17896_at   | 17896_at   | 1    | 0.31  | 0.01  | -0.47 | 0.51  | 1.2  | 0.88 |
|           | 0.57       | 0.84       | 0.58 |       |       |       |       |      |      |
| GENE475X  | 13468_at   | 13468_at   | 1    | -0.4  | 0.41  | 0.04  | 0.38  | 1.3  | 0.23 |
|           | 0.71       | 0.54       | 1.09 |       |       |       |       |      |      |
| GENE2578X | 20421_at   | 20421_at   | 1    | 0     | 2.2   | 1.76  | -0.32 | 5.19 | 2.56 |
|           | 1.5        | 5.36       | 4.11 |       |       |       |       |      |      |
| GENE385X  | 13163_s_at | 13163_s_at | 1    | -0.19 | 0.33  | 0.38  | 0.16  | 1.57 | 0.81 |
|           | 0.52       | 1.44       | 1.17 |       |       |       |       |      |      |
| GENE1221X | 15912_at   | 15912_at   | 1    | -0.05 | 0.22  | 0.49  | 0.07  | 1.11 | 0.3  |
|           | 0.33       | 1.11       | 0.66 |       |       |       |       |      |      |
| GENE2579X | 20422_g_at | 20422_g_at | 1    | 0     | 0.26  | 0     | 0.26  | 5.37 | 2.53 |
|           | 0.78       | 4.81       | 3.47 |       |       |       |       |      |      |
| GENE433X  | 13277_i_at | 13277_i_at | 1    | -0.5  | 0.33  | 0.08  | -0.26 | 3.23 | 0.9  |
|           | 0.28       | 2.6        | 1.26 |       |       |       |       |      |      |
| GENE1609X | 17094_s_at | 17094_s_at | 1    | 0.13  | 0.41  | 0.47  | -0.28 | 1.4  | 0.99 |
|           | 0.34       | 1.25       | 1.01 |       |       |       |       |      |      |
| GENE2551X | 20337_at   | 20337_at   | 1    | -0.11 | 0.31  | 0.11  | -0.13 | 2    | 1.49 |
|           | 0.5        | 1.54       | 1.35 |       |       |       |       |      |      |
| GENE357X  | 13119_at   | 13119_at   | 1    | 0     | -0.03 | 0.23  | -0.09 | 1.16 | 0.85 |
|           | 0.08       | 0.82       | 1.05 |       |       |       |       |      |      |
| GENE1375X | 16343_at   | 16343_at   | 1    | -0.22 | 0.44  | 0.19  | 0.18  | 1.35 | 0.92 |
|           | 0.13       | 0.74       | 0.59 |       |       |       |       |      |      |
| GENE1780X | 17757_at   | 17757_at   | 1    | -0.24 | 0.82  | 0.38  | 0.32  | 2.48 | 1    |
|           | 0.09       | 1.08       | 0.45 |       |       |       |       |      | -    |
| GENE524X  | 13604_at   | 13604_at   | 1    | 0.13  | 0.21  | 0.33  | 0.28  | 1.38 | 0.96 |
|           | 0.02       | 0.86       | 0.38 |       |       |       |       |      |      |
| GENE2547X | 20323_at   | 20323_at   | 1    | -0.07 | 0.7   | 0.7   | 0     | 3.62 | 2.71 |
|           | 0.7        | 2.1        | 0.88 |       |       |       |       |      | -    |
| GENE1748X | 17578_at   | 17578_at   | 1    | 0     | 0.26  | 0.32  | 0.25  | 1.5  | 1.27 |
|           | 0.21       | 0.73       | 0.73 |       |       |       |       |      | -    |
| GENE1968X | 18305_at   | 18305_at   | 1    | -0.11 | 0.01  | 0.02  | 0.09  | 1.01 | 0.48 |
|           | 0.14       | 0.34       | 0.5  |       |       |       |       |      |      |
| GENE1209X | 15883_at   | 15883_at   | 1    | -0.48 | 0.03  | -0.07 | 0.22  | 1.45 | 0.33 |
|           | 0.09       | 0.78       | 0.69 |       |       |       |       |      |      |
| GENE434X  | 13278_f_at | 13278_f_at | 1    | -0.77 | 0.5   | 0.41  | 0     | 4.15 | 1.92 |
|           | 1.92       | 0.67       |      |       |       |       |       |      | 0    |
| GENE1736X | 17554_at   | 17554_at   | 1    | -0.45 | 0.03  | 0.16  | 0.13  | 3.18 | 1.26 |
|           | 0.61       | 1.54       | 0.56 |       |       |       |       |      | -    |
| GENE2555X | 20354_s_at | 20354_s_at | 1    | -0.11 | -0.2  | -0.1  | -0.11 | 1.06 | 0.81 |
|           | 0.06       | 0.32       | 0.29 |       |       |       |       |      |      |
| GENE625X  | 14007_at   | 14007_at   | 1    | 0.08  | -0.09 | 0.14  | -0.16 | 1.04 | 0.47 |
|           | 0.32       | 0.45       | 0.18 |       |       |       |       |      |      |
| GENE2234X | 19257_s_at | 19257_s_at | 1    | -0.36 | -0.16 | -0.16 | 0.08  | 1.85 | 1.7  |
|           | 0.05       | 1.67       | 1.15 |       |       |       |       |      |      |

|           |            |            |       |       |       |       |       |      |      |   |
|-----------|------------|------------|-------|-------|-------|-------|-------|------|------|---|
| GENE1116X | 15580_at   | 15580_at   | 1     | -0.15 | -0.1  | 0.01  | -0.01 | 1.11 | 1.44 |   |
|           | 0.05       | 1.11       | 0.88  |       |       |       |       |      |      |   |
| GENE100X  | 12246_s_at | 12246_s_at | 1     | -0.34 | 0     | -0.48 | -0.28 | 1.64 | 1.58 | - |
|           | 0.32       | 1.09       | 0.73  |       |       |       |       |      |      |   |
| GENE2656X | 20647_at   | 20647_at   | 1     | 0     | -0.45 | -0.72 | 0.56  | 1.58 | 1.19 | - |
|           | 0.18       | 0.54       | 0.9   |       |       |       |       |      |      |   |
| GENE2609X | 20517_at   | 20517_at   | 1     | -0.26 | -0.46 | -0.04 | 0.73  | 1.79 | 1.89 | - |
|           | 0.02       | 0.87       | 0.87  |       |       |       |       |      |      |   |
| GENE2042X | 18610_s_at | 18610_s_at | 1     | -0.11 | -0.23 | -0.2  | 0.33  | 1.23 | 0.75 | - |
|           | 0.07       | 0.66       | 0.45  |       |       |       |       |      |      |   |
| GENE2045X | 18621_at   | 18621_at   | 1     | 0.12  | 0.05  | 0.1   | 0.33  | 1.08 | 0.73 | - |
|           | 0.07       | 0.43       | 0.64  |       |       |       |       |      |      |   |
| GENE1063X | 15457_at   | 15457_at   | 1     | 0.22  | 0.06  | -0.06 | 0.33  | 1.21 | 0.89 | - |
|           | 0.15       | 0.23       | 0.38  |       |       |       |       |      |      |   |
| GENE2473X | 20140_at   | 20140_at   | 1     | -0.39 | -0.3  | -0.58 | 1.65  | 2.71 | 2.36 |   |
|           | 0.53       | 1.71       | 1.22  |       |       |       |       |      |      |   |
| GENE1531X | 16819_at   | 16819_at   | 1     | -0.42 | -0.03 | -0.42 | 1.72  | 3.12 | 2.15 |   |
|           | 0.41       | 1.69       | 0.87  |       |       |       |       |      |      |   |
| GENE2569X | 20390_s_at | 20390_s_at | 1     | -0.16 | -0.43 | -0.43 | 1.45  | 2.76 | 1.64 |   |
|           | 1.37       | 1.76       | 1.05  |       |       |       |       |      |      |   |
| GENE783X  | 14582_at   | 14582_at   | 1     | -0.14 | -0.1  | -0.02 | 0.84  | 1.45 | 1.03 |   |
|           | 0.77       | 0.97       | 0.36  |       |       |       |       |      |      |   |
| GENE284X  | 12883_at   | 12883_at   | 1     | -0.27 | -0.53 | -0.23 | 0.8   | 1.81 | 1.29 |   |
|           | 0.61       | 1.08       | 0.57  |       |       |       |       |      |      |   |
| GENE619X  | 13964_at   | 13964_at   | 1     | 0     | -0.12 | -0.27 | 1.11  | 1.55 | 1.4  |   |
|           | 0.7        | 1.38       | 1.1   |       |       |       |       |      |      |   |
| GENE91X   | 12231_at   | 12231_at   | 1     | 0.15  | 0.07  | -0.41 | 1.16  | 1.51 | 1.28 |   |
|           | 0.73       | 0.73       | 0.81  |       |       |       |       |      |      |   |
| GENE2002X | 18482_at   | 18482_at   | 1     | -1.09 | -0.96 | -0.91 | 2.08  | 2.11 | 3.65 |   |
|           | 1.66       | 1.46       | 1.64  |       |       |       |       |      |      |   |
| GENE1163X | 15674_at   | 15674_at   | 1     | -0.49 | -1.14 | -0.91 | 1.77  | 1.72 | 1.96 |   |
|           | 1.11       | 0.94       | 1.11  |       |       |       |       |      |      |   |
| GENE2336X | 19678_g_at | 19678_g_at | 1     | -0.2  | -0.5  | -0.08 | 0.68  | 0.76 | 1.04 |   |
|           | 0.35       | 0.41       | 0.31  |       |       |       |       |      |      |   |
| GENE2525X | 20264_at   | 20264_at   | 1     | -0.22 | -0.17 | -0.18 | 1.17  | 1.01 | 1.06 |   |
|           | 0.54       | 0.53       | 0.3   |       |       |       |       |      |      |   |
| GENE2557X | 20357_at   | 20357_at   | 1     | 0.11  | -0.4  | -0.81 | 0.63  | 1.37 | 0.84 |   |
|           | 0.85       | 0.8        | 0.32  |       |       |       |       |      |      |   |
| GENE2403X | 19936_at   | 19936_at   | 1     | 0.18  | -0.33 | -1.68 | 3     | 3.74 | 2.58 |   |
|           | 3.56       | 2.58       | 0.67  |       |       |       |       |      |      |   |
| GENE1519X | 16744_at   | 16744_at   | 1     | 0.25  | -0.24 | -0.79 | 0.88  | 1.61 | 0.83 |   |
|           | 1.35       | 0.64       | -0.09 |       |       |       |       |      |      |   |
| GENE592X  | 13860_s_at | 13860_s_at | 1     | -0.5  | -0.39 | -0.23 | 0.56  | 0.94 | 0.97 |   |
|           | 1.43       | 1.36       | 0.53  |       |       |       |       |      |      |   |
| GENE307X  | 12966_s_at | 12966_s_at | 1     | -0.49 | -0.42 | -0.94 | 0.94  | 1.48 | 0.96 |   |
|           | 1.96       | 1.61       | 0.21  |       |       |       |       |      |      |   |
| GENE450X  | 13330_at   | 13330_at   | 1     | -0.41 | -0.26 | -0.49 | 0.45  | 1.02 | 0.76 |   |
|           | 0.88       | 0.97       | 0.15  |       |       |       |       |      |      |   |
| GENE682X  | 14240_s_at | 14240_s_at | 1     | -0.67 | -0.46 | -0.45 | 2.03  | 1.98 | 0.22 |   |
|           | 1.34       | 0.94       | -0.92 |       |       |       |       |      |      |   |
| GENE1308X | 16119_s_at | 16119_s_at | 1     | -0.46 | -0.54 | -0.84 | 1.05  | 1.9  | 0.46 |   |
|           | 0.65       | 1.13       | 0.16  |       |       |       |       |      |      |   |
| GENE2465X | 20098_at   | 20098_at   | 1     | -0.12 | 0.22  | -0.58 | 1.22  | 2.32 | 0.53 |   |
|           | 0.53       | 2.58       | 0.15  |       |       |       |       |      |      |   |
| GENE155X  | 12440_at   | 12440_at   | 1     | -0.17 | 0.15  | -0.2  | 0.77  | 2.31 | 0.86 |   |
|           | 0.51       | 1.21       | 0.29  |       |       |       |       |      |      |   |

|           |            |            |       |       |       |       |       |      |      |   |
|-----------|------------|------------|-------|-------|-------|-------|-------|------|------|---|
| GENE1038X | 15376_at   | 15376_at   | 1     | -0.28 | 0.49  | -0.15 | 0.75  | 1.73 | 0.94 |   |
|           | 0.54       | 0.79       | -0.04 |       |       |       |       |      |      |   |
| GENE1624X | 17139_at   | 17139_at   | 1     | -0.04 | -0.04 | -0.28 | 0.38  | 1.5  | 0.49 |   |
|           | 0.45       | 0.55       | -0.24 |       |       |       |       |      |      |   |
| GENE386X  | 13171_at   | 13171_at   | 1     | -0.33 | 0.58  | -0.25 | 0.21  | 0.67 | 0.81 |   |
|           | 1.17       | 0.36       | 0.14  |       |       |       |       |      |      |   |
| GENE1186X | 15792_at   | 15792_at   | 1     | 0.21  | 0.15  | -0.54 | 2.19  | 2.01 | 2.35 | 3 |
|           | 1.79       | 0.9        |       |       |       |       |       |      |      |   |
| GENE1468X | 16566_s_at | 16566_s_at | 1     | -0.21 | -0.15 | -0.3  | 1.55  | 0.86 | 1.06 |   |
|           | 1.75       | 0.81       | 0.31  |       |       |       |       |      |      |   |
| GENE1900X | 18102_at   | 18102_at   | 1     | 0.12  | 0.04  | -0.14 | 0.86  | 0.71 | 0.66 |   |
|           | 1.13       | 0.42       | -0.37 |       |       |       |       |      |      |   |
| GENE2625X | 20566_s_at | 20566_s_at | 1     | 0.51  | 0.16  | -0.25 | 1.54  | 1.11 | 0.9  |   |
|           | 0.7        | 0.27       | -0.02 |       |       |       |       |      |      |   |
| GENE1491X | 16627_s_at | 16627_s_at | 1     | -0.02 | -0.1  | -0.01 | 1.01  | 0.37 | 0.44 |   |
|           | 0.58       | 0.06       | -0.17 |       |       |       |       |      |      |   |
| GENE1048X | 15406_at   | 15406_at   | 1     | 0.18  | -0.21 | 0.28  | 2.8   | 1.46 | 1.12 |   |
|           | 1.63       | 0.71       | -0.86 |       |       |       |       |      |      |   |
| GENE200X  | 12592_at   | 12592_at   | 1     | -0.02 | -0.19 | -0.58 | 0.61  | 1.01 | 0.94 |   |
|           | 0.42       | 0.16       | 0.13  |       |       |       |       |      |      |   |
| GENE1506X | 16681_s_at | 16681_s_at | 1     | -0.28 | -0.4  | -0.65 | 0.96  | 0.98 | 1.42 |   |
|           | 0.39       | 0.61       | 0.14  |       |       |       |       |      |      |   |
| GENE2167X | 18978_at   | 18978_at   | 1     | -0.34 | -0.36 | -0.36 | 0.66  | 1.07 | 1.07 |   |
|           | 0.56       | 0.69       | -0.02 |       |       |       |       |      |      |   |
| GENE59X   | 12148_at   | 12148_at   | 1     | 0.02  | -0.17 | -0.26 | 0.98  | 0.94 | 1.17 |   |
|           | 0.62       | 0.22       | -0.4  |       |       |       |       |      |      |   |
| GENE1019X | 15241_s_at | 15241_s_at | 1     | 0.35  | -0.85 | -0.77 | 1.07  | 1.21 | 0.77 |   |
|           | 0.26       | 0.19       | 0     |       |       |       |       |      |      |   |
| GENE1100X | 15536_at   | 15536_at   | 1     | 0.2   | -0.79 | -0.73 | 0.87  | 1.22 | 0.76 |   |
|           | 0.42       | 0.45       | -0.44 |       |       |       |       |      |      |   |
| GENE1514X | 16702_at   | 16702_at   | 1     | 0.12  | 0.19  | 0.16  | 0.03  | 1.02 | 0.21 | - |
|           | 0.44       | 0.21       | 0.3   |       |       |       |       |      |      |   |
| GENE2529X | 20281_at   | 20281_at   | 1     | -0.05 | 0.46  | 0.14  | -0.05 | 1.04 | 0.38 | - |
|           | 0.38       | -0.17      | 0.03  |       |       |       |       |      |      |   |
| GENE156X  | 12446_at   | 12446_at   | 1     | -1.1  | 0.55  | 0.82  | -0.05 | 1.21 | 0.71 | - |
|           | 0.69       | 0.12       | -0.28 |       |       |       |       |      |      |   |
| GENE1663X | 17366_at   | 17366_at   | 1     | -0.37 | -0.32 | -0.22 | -0.31 | 1.06 | 0.63 |   |
|           | 0.07       | 0.19       | -0.45 |       |       |       |       |      |      |   |
| GENE1793X | 17859_at   | 17859_at   | 1     | 0.09  | 0.24  | 0.15  | -0.24 | 1.34 | 0.61 |   |
|           | 0.06       | 0          | -0.43 |       |       |       |       |      |      |   |
| GENE708X  | 14412_at   | 14412_at   | 1     | 0.22  | 0.11  | -0.38 | 0.26  | 1.21 | 0.64 |   |
|           | 0.09       | 0.4        | -0.55 |       |       |       |       |      |      |   |
| GENE2655X | 20646_at   | 20646_at   | 1     | -1.24 | -1.24 | -1.66 | 1.22  | 2.58 | 3.22 |   |
|           | 0.5        | 1.77       | 1.65  |       |       |       |       |      |      |   |
| GENE1983X | 18348_at   | 18348_at   | 1     | -0.33 | -0.58 | -0.64 | 0.34  | 0.88 | 1.36 |   |
|           | 0.61       | 0.87       | 0.77  |       |       |       |       |      |      |   |
| GENE1188X | 15798_at   | 15798_at   | 1     | -0.3  | -0.5  | -1.04 | 0.94  | 1.74 | 3.42 |   |
|           | 0.48       | 1.26       | 1.7   |       |       |       |       |      |      |   |
| GENE1413X | 16454_s_at | 16454_s_at | 1     | -0.1  | -0.33 | -0.2  | 0.52  | 0.74 | 1.09 |   |
|           | 0.11       | 0.43       | 0.57  |       |       |       |       |      |      |   |
| GENE2540X | 20299_at   | 20299_at   | 1     | 0.14  | -0.81 | -1.17 | 0.37  | 1.08 | 1.44 |   |
|           | 0.35       | 0.3        | 0.48  |       |       |       |       |      |      |   |
| GENE2516X | 20245_s_at | 20245_s_at | 1     | 0.39  | -0.35 | -0.54 | 0.59  | 1.31 | 1.48 |   |
|           | 0.08       | 0.4        | 0.72  |       |       |       |       |      |      |   |
| GENE913X  | 15036_r_at | 15036_r_at | 1     | 0.28  | -0.32 | -0.66 | 0.62  | 0.96 | 1.39 |   |
|           | 0.35       | 0.27       | 0.57  |       |       |       |       |      |      |   |

|           |            |            |      |       |       |       |       |      |      |   |
|-----------|------------|------------|------|-------|-------|-------|-------|------|------|---|
| GENE2541X | 20300_g_at | 20300_g_at | 1    | 0.5   | -0.32 | -0.72 | 0.34  | 1.18 | 1.34 |   |
|           | 0.56       | 0.54       | 0.62 |       |       |       |       |      |      |   |
| GENE1859X | 18014_s_at | 18014_s_at | 1    | -0.02 | -0.44 | -0.38 | 0.4   | 1.14 | 1.02 |   |
|           | 0.35       | 0.42       | 0.72 |       |       |       |       |      |      |   |
| GENE2148X | 18947_i_at | 18947_i_at | 1    | -0.01 | -0.23 | -0.18 | 0.64  | 1.19 | 1.15 |   |
|           | 0.45       | 0.41       | 0.75 |       |       |       |       |      |      |   |
| GENE1072X | 15473_at   | 15473_at   | 1    | 0.08  | -0.26 | -0.1  | 0.48  | 1.13 | 1.04 |   |
|           | 0.26       | 0.27       | 0.41 |       |       |       |       |      |      |   |
| GENE2028X | 18587_s_at | 18587_s_at | 1    | -0.58 | -1.1  | -0.2  | 1.11  | 1.15 | 2.36 |   |
|           | 0.44       | 0.36       | 1.19 |       |       |       |       |      |      |   |
| GENE2158X | 18965_at   | 18965_at   | 1    | -0.45 | -0.4  | 0.05  | 0.92  | 0.71 | 1.3  |   |
|           | 0.23       | -0.16      | 0.6  |       |       |       |       |      |      |   |
| GENE1705X | 17467_at   | 17467_at   | 1    | -0.15 | -0.38 | -0.08 | 1.08  | 1.01 | 1.73 | 0 |
|           | -0.22      | 0.23       |      |       |       |       |       |      |      |   |
| GENE959X  | 15124_s_at | 15124_s_at | 1    | -0.07 | -0.22 | -0.44 | 1.94  | 2.46 | 3.94 |   |
|           | 0.44       | 0.91       | 0.45 |       |       |       |       |      |      |   |
| GENE2644X | 20618_at   | 20618_at   | 1    | -0.01 | -0.08 | -0.15 | 0.5   | 0.76 | 1.01 |   |
|           | 0.3        | 0.12       | 0.31 |       |       |       |       |      |      |   |
| GENE1700X | 17451_at   | 17451_at   | 1    | 0.18  | -0.11 | -0.62 | 1.1   | 0.35 | 0.64 |   |
|           | 0.13       | -0.12      | 0.3  |       |       |       |       |      |      |   |
| GENE2626X | 20569_s_at | 20569_s_at | 1    | -0.35 | -0.7  | -1.21 | 1.16  | 0.69 | 0.89 | - |
|           | 0.18       | -0.18      | 0.2  |       |       |       |       |      |      |   |
| GENE333X  | 13063_at   | 13063_at   | 1    | -0.82 | -0.52 | -0.87 | 1.16  | 1.48 | 0.56 | - |
|           | 0.47       | 0.02       | -0.4 |       |       |       |       |      |      |   |
| GENE449X  | 13324_at   | 13324_at   | 1    | -0.34 | -0.38 | -0.47 | 0     | 0.48 | 1.01 | - |
|           | 0.72       | -0.28      | 0.04 |       |       |       |       |      |      |   |
| GENE175X  | 12510_at   | 12510_at   | 1    | 0.16  | -0.04 | -0.08 | 0.25  | 0.77 | 1.12 | - |
|           | 0.23       | -0.1       | 0.22 |       |       |       |       |      |      |   |
| GENE2343X | 19708_at   | 19708_at   | 1    | 0.15  | -0.01 | -0.08 | -0.02 | 0.97 | 1.18 | - |
|           | 0.46       | -0.15      | 0.15 |       |       |       |       |      |      |   |
| GENE722X  | 14450_at   | 14450_at   | 1    | 0.06  | -0.01 | -0.12 | 0.47  | 1.06 | 1.12 | - |
|           | 0.44       | 0.22       | 0.16 |       |       |       |       |      |      |   |
| GENE1334X | 16198_at   | 16198_at   | 1    | 0.76  | 1.37  | 0.67  | -0.73 | -1   | 2.8  |   |
|           | 0.48       | 1.13       | 3.29 |       |       |       |       |      |      |   |
| GENE1154X | 15662_s_at | 15662_s_at | 1    | 0.29  | 0.33  | 0.36  | 0.13  | -0.3 | 1.87 |   |
|           | 0.49       | 0.37       | 1.94 |       |       |       |       |      |      |   |
| GENE983X  | 15162_at   | 15162_at   | 1    | 0.5   | -0.24 | 0     | 0.25  | 0.31 | 1.74 |   |
|           | 0.54       | 1.87       | 3.13 |       |       |       |       |      |      |   |
| GENE1481X | 16603_s_at | 16603_s_at | 1    | 0.35  | -0.28 | -0.4  | 0.17  | 0.77 | 2.08 |   |
|           | 0.73       | 1.64       | 3.11 |       |       |       |       |      |      |   |
| GENE639X  | 14025_s_at | 14025_s_at | 1    | 0.07  | 0.17  | 0.17  | 0.26  | 0.31 | 1.57 |   |
|           | 0.35       | 0.77       | 1.91 |       |       |       |       |      |      |   |
| GENE2133X | 18909_s_at | 18909_s_at | 1    | 0.64  | 0.61  | 0.59  | 0.21  | 0.58 | 1.92 |   |
|           | 0.55       | 1.23       | 2.54 |       |       |       |       |      |      |   |
| GENE2370X | 19852_s_at | 19852_s_at | 1    | 0.28  | 0.32  | 0.21  | 0.31  | 0.32 | 0.92 |   |
|           | 0.28       | 0.64       | 1.45 |       |       |       |       |      |      |   |
| GENE1376X | 16346_at   | 16346_at   | 1    | 0     | 0     | 0     | 0     | 0.84 | 3.13 | 0 |
|           | 3.67       | 2.92       |      |       |       |       |       |      |      |   |
| GENE1103X | 15547_at   | 15547_at   | 1    | 0     | 0     | 0     | 0     | 0    | 2.26 | 0 |
|           | 2.43       | 3.63       |      |       |       |       |       |      |      |   |
| GENE2628X | 20572_at   | 20572_at   | 1    | 0     | 0.22  | 0.22  | 0.08  | 0    | 2.61 |   |
|           | 0.58       | 2.08       | 2.78 |       |       |       |       |      |      |   |
| GENE748X  | 14503_at   | 14503_at   | 1    | -0.21 | -0.1  | 0.14  | -0.08 | 0.12 | 0.64 |   |
|           | 0.17       | 0.9        | 1.07 |       |       |       |       |      |      |   |
| GENE1460X | 16545_s_at | 16545_s_at | 1    | -1    | 0.13  | 0.26  | 0.58  | 0.09 | 2.51 |   |
|           | 0.58       | 1.61       | 3.13 |       |       |       |       |      |      |   |

|           |            |            |      |       |       |       |       |      |      |   |
|-----------|------------|------------|------|-------|-------|-------|-------|------|------|---|
| GENE562X  | 13670_s_at | 13670_s_at | 1    | -0.38 | 0.08  | 0.13  | 0.18  | 0.41 | 0.64 |   |
|           | 0.15       | 0.66       | 1.16 |       |       |       |       |      |      |   |
| GENE2088X | 18716_at   | 18716_at   | 1    | 2.2   | 0.67  | 4.03  | 0     | 1.13 | 4.32 | 2 |
|           | 1.76       | 4.3        |      |       |       |       |       |      |      |   |
| GENE43X   | 12104_at   | 12104_at   | 1    | 1.22  | -0.41 | 0.66  | 0     | 0.51 | 1.13 |   |
|           | 0.56       | 0.79       | 1.35 |       |       |       |       |      |      |   |
| GENE727X  | 14461_at   | 14461_at   | 1    | 0     | 0     | 1.26  | 0     | 2.48 | 4.51 | 0 |
|           | 1.67       | 3.58       |      |       |       |       |       |      |      |   |
| GENE1164X | 15675_s_at | 15675_s_at | 1    | 0     | 0.67  | 2.37  | 1.13  | 1.67 | 4.12 | 0 |
|           | 0.67       | 2.72       |      |       |       |       |       |      |      |   |
| GENE2247X | 19364_at   | 19364_at   | 1    | -0.07 | 0.22  | 0.3   | 0.52  | 1.07 | 1.87 |   |
|           | 0.18       | 0.11       | 1.01 |       |       |       |       |      |      |   |
| GENE2147X | 18946_at   | 18946_at   | 1    | 1.39  | 1.75  | 2.15  | 0.86  | 1.33 | 3.73 |   |
|           | 1.42       | 2.2        | 4.09 |       |       |       |       |      |      |   |
| GENE916X  | 15042_at   | 15042_at   | 1    | 1.13  | 1.26  | 1.17  | 1.03  | 1.57 | 2.89 |   |
|           | 1.29       | 2.01       | 3.11 |       |       |       |       |      |      |   |
| GENE381X  | 13158_at   | 13158_at   | 1    | 0.71  | 0.8   | 0.9   | 0.63  | 0.98 | 1.89 |   |
|           | 0.83       | 1.27       | 2.15 |       |       |       |       |      |      |   |
| GENE2132X | 18908_i_at | 18908_i_at | 1    | 0.78  | 1.11  | 0.65  | 0.4   | 0.88 | 2.63 |   |
|           | 0.85       | 1.25       | 2.66 |       |       |       |       |      |      |   |
| GENE2309X | 19614_at   | 19614_at   | 1    | 1.26  | 2     | 2.2   | 1.78  | 1.7  | 5.07 |   |
|           | 1.9        | 2.14       | 4.49 |       |       |       |       |      |      |   |
| GENE1733X | 17548_s_at | 17548_s_at | 1    | 1.13  | 1.48  | 2     | 1.91  | 2.29 | 5.53 |   |
|           | 1.36       | 1.86       | 4.1  |       |       |       |       |      |      |   |
| GENE389X  | 13176_at   | 13176_at   | 1    | 0.77  | 0.91  | 1.18  | 0.45  | 1.45 | 2.73 |   |
|           | 0.39       | 1.15       | 2.27 |       |       |       |       |      |      |   |
| GENE2109X | 18794_at   | 18794_at   | 1    | 0.4   | 0.68  | 0.89  | 0.29  | 0.87 | 1.72 |   |
|           | 0.22       | 0.68       | 1.5  |       |       |       |       |      |      |   |
| GENE184X  | 12535_at   | 12535_at   | 1    | 0     | 1     | 0.84  | 0.67  | 1.84 | 4.95 |   |
|           | 0.67       | 3.37       | 5.33 |       |       |       |       |      |      |   |
| GENE2267X | 19421_at   | 19421_at   | 1    | 0.13  | 1.01  | 0.69  | 0.29  | 1.27 | 2.53 |   |
|           | 0.55       | 1.75       | 2.57 |       |       |       |       |      |      |   |
| GENE466X  | 13437_at   | 13437_at   | 1    | 0.23  | 0.36  | 0.51  | 0.36  | 0.93 | 1.32 |   |
|           | 0.04       | 1.09       | 1.71 |       |       |       |       |      |      |   |
| GENE971X  | 15140_s_at | 15140_s_at | 1    | 0.18  | 0.31  | 0.42  | 0.47  | 1.08 | 1.12 |   |
|           | 0.32       | 0.96       | 1.48 |       |       |       |       |      |      |   |
| GENE2577X | 20420_at   | 20420_at   | 1    | 1.74  | 1.61  | 1.74  | 2     | 2.07 | 5.1  |   |
|           | 0.26       | 2.88       | 5.7  |       |       |       |       |      |      |   |
| GENE495X  | 13549_at   | 13549_at   | 1    | 0.42  | 0.78  | 0.97  | 1.17  | 0.95 | 3.59 |   |
|           | 0.24       | 1.12       | 3.77 |       |       |       |       |      |      |   |
| GENE658X  | 14068_s_at | 14068_s_at | 1    | 0.93  | 0.97  | 1.22  | 0.35  | 0.58 | 3.2  |   |
|           | 0.48       | 1.63       | 2.71 |       |       |       |       |      |      |   |
| GENE2200X | 19158_at   | 19158_at   | 1    | 0.87  | 1.26  | 1.32  | 0.69  | 0.23 | 2.42 | - |
|           | 0.09       | 0.85       | 2.68 |       |       |       |       |      |      |   |
| GENE1730X | 17533_s_at | 17533_s_at | 1    | 0.65  | 2.42  | 3.21  | 0.26  | 2.92 | 5.88 | - |
|           | 0.48       | 1.77       | 5.49 |       |       |       |       |      |      |   |
| GENE740X  | 14487_at   | 14487_at   | 1    | 0.5   | 0.55  | 0.47  | 0.16  | 0.66 | 0.97 | - |
|           | 0.08       | 0.51       | 1.26 |       |       |       |       |      |      |   |
| GENE589X  | 13848_at   | 13848_at   | 1    | 0.16  | 0.44  | 0.34  | 0.25  | 0.42 | 1.56 | - |
|           | 0.11       | 0.32       | 0.96 |       |       |       |       |      |      |   |
| GENE2063X | 18663_s_at | 18663_s_at | 1    | 0.59  | 1.02  | 0.41  | 0.8   | 0.84 | 1.86 | - |
|           | 0.06       | 0.28       | 1.45 |       |       |       |       |      |      |   |
| GENE1964X | 18298_at   | 18298_at   | 1    | 0.7   | 1.03  | -0.27 | -0.08 | 0.16 | 1    | - |
|           | 0.44       | 0.87       | 0.45 |       |       |       |       |      |      |   |
| GENE1814X | 17907_s_at | 17907_s_at | 1    | 0.84  | 1.26  | 1.84  | 1.58  | 4    | 4.53 |   |
|           | 3.32       | 5.24       | 5.07 |       |       |       |       |      |      |   |

|           |            |            |      |       |       |       |      |      |      |
|-----------|------------|------------|------|-------|-------|-------|------|------|------|
| GENE2168X | 18980_at   | 18980_at   | 1    | 0.17  | 0.64  | 0.59  | 0.59 | 2.01 | 2.08 |
|           | 1.57       | 2.19       | 2.11 |       |       |       |      |      |      |
| GENE2311X | 19623_at   | 19623_at   | 1    | 0.21  | 0.39  | 0.36  | 0.28 | 0.91 | 0.78 |
|           | 0.72       | 0.94       | 1.02 |       |       |       |      |      |      |
| GENE1044X | 15389_at   | 15389_at   | 1    | 0.5   | 0.98  | 1.44  | 1.48 | 2.72 | 2.58 |
|           | 2.91       | 3.77       | 3.37 |       |       |       |      |      |      |
| GENE1937X | 18252_at   | 18252_at   | 1    | 0.28  | 0.36  | 0.33  | 0.45 | 1    | 0.93 |
|           | 0.8        | 1.36       | 1.14 |       |       |       |      |      |      |
| GENE538X  | 13627_at   | 13627_at   | 1    | 0     | 2     | 1.13  | 1.76 | 3.94 | 3.8  |
|           | 3.13       | 5.54       | 4.66 |       |       |       |      |      |      |
| GENE953X  | 15110_s_at | 15110_s_at | 1    | -0.06 | 0.21  | 0.35  | 0.41 | 0.81 | 0.73 |
|           | 0.68       | 1.05       | 0.85 |       |       |       |      |      |      |
| GENE424X  | 13259_s_at | 13259_s_at | 1    | 0.34  | 0.24  | 0.24  | 0.41 | 1.54 | 1.33 |
|           | 1.12       | 2.02       | 1.54 |       |       |       |      |      |      |
| GENE2335X | 19677_at   | 19677_at   | 1    | 0.14  | 0.2   | 0.24  | 0.37 | 1    | 0.71 |
|           | 0.71       | 1.25       | 1.25 |       |       |       |      |      |      |
| GENE2197X | 19152_at   | 19152_at   | 1    | -0.26 | 0.41  | 0.58  | 0.19 | 2.74 | 3.14 |
|           | 3.45       | 4.19       | 3.74 |       |       |       |      |      |      |
| GENE2264X | 19405_at   | 19405_at   | 1    | -0.14 | -0.06 | 0.07  | 0.56 | 1.46 | 1.38 |
|           | 1.56       | 1.69       | 2.03 |       |       |       |      |      |      |
| GENE1615X | 17104_s_at | 17104_s_at | 1    | -0.02 | 0.11  | 0.48  | 0.93 | 1.06 | 1.46 |
|           | 1.92       | 2.37       | 2.32 |       |       |       |      |      |      |
| GENE1448X | 16526_at   | 16526_at   | 1    | -0.05 | 0.03  | 0.56  | 0.77 | 1.21 | 1.92 |
|           | 1.72       | 2.16       | 2.31 |       |       |       |      |      |      |
| GENE819X  | 14673_s_at | 14673_s_at | 1    | -0.93 | 0.25  | 0.36  | 1.91 | 2.55 | 2.57 |
|           | 2.53       | 3.07       | 2.94 |       |       |       |      |      |      |
| GENE2404X | 19944_at   | 19944_at   | 1    | 0.37  | 0.26  | 0.21  | 1.25 | 2.17 | 1.51 |
|           | 2.29       | 3.03       | 2.58 |       |       |       |      |      |      |
| GENE1279X | 16058_s_at | 16058_s_at | 1    | 0.28  | 0.32  | 0.3   | 0.95 | 1.7  | 1.59 |
|           | 1.59       | 2.48       | 2.14 |       |       |       |      |      |      |
| GENE89X   | 12227_at   | 12227_at   | 1    | 0.24  | 0.37  | 0.37  | 0.97 | 1.96 | 1.8  |
|           | 2.37       | 2.41       | 2.23 |       |       |       |      |      |      |
| GENE1224X | 15921_s_at | 15921_s_at | 1    | 0.39  | 0.27  | 0.26  | 1.13 | 1.96 | 1.59 |
|           | 2.09       | 2.46       | 1.72 |       |       |       |      |      |      |
| GENE1670X | 17384_at   | 17384_at   | 1    | 0.22  | 0.17  | 0.04  | 0.84 | 1.23 | 0.97 |
|           | 1.08       | 1.56       | 1.1  |       |       |       |      |      |      |
| GENE2358X | 19819_at   | 19819_at   | 1    | 0.3   | -0.38 | 0.42  | 0.36 | 0.88 | 0.63 |
|           | 0.72       | 1.29       | 0.95 |       |       |       |      |      |      |
| GENE518X  | 13589_at   | 13589_at   | 1    | 0.71  | 0.91  | 0.26  | 0.89 | 1.53 | 1.22 |
|           | 0.71       | 2.29       | 2.21 |       |       |       |      |      |      |
| GENE2604X | 20491_at   | 20491_at   | 1    | 1     | 0.42  | 0.95  | 1.34 | 2.02 | 3.29 |
|           | 1.88       | 3.4        | 4.06 |       |       |       |      |      |      |
| GENE465X  | 13435_at   | 13435_at   | 1    | 0.69  | 0.9   | 0.67  | 1.18 | 1.26 | 2.47 |
|           | 2.3        | 2.69       | 3.31 |       |       |       |      |      |      |
| GENE30X   | 12072_at   | 12072_at   | 1    | 0.05  | 0.21  | 0.18  | 0.57 | 0.5  | 0.61 |
|           | 0.47       | 0.73       | 1.04 |       |       |       |      |      |      |
| GENE2411X | 19956_at   | 19956_at   | 1    | -0.05 | 0.16  | -0.15 | 1.89 | 3.38 | 4.28 |
|           | 2.14       | 3.58       | 4.65 |       |       |       |      |      |      |
| GENE8X    | 12002_at   | 12002_at   | 1    | -0.02 | 0.19  | 0.31  | 0.59 | 1.45 | 2.29 |
|           | 1.95       | 2.41       |      |       |       |       |      |      | 1    |
| GENE2620X | 20543_at   | 20543_at   | 1    | 0.53  | 0.73  | 0.63  | 1.37 | 2.37 | 3.45 |
|           | 2.27       | 2.84       | 3.39 |       |       |       |      |      |      |
| GENE2495X | 20194_at   | 20194_at   | 1    | 0.58  | 0.41  | 0.83  | 1.96 | 3.39 | 4.31 |
|           | 3.39       | 4.18       | 4.18 |       |       |       |      |      |      |
| GENE2660X | 20656_at   | 20656_at   | 1    | -0.02 | 0.2   | 0.45  | 0.62 | 1.56 | 1.74 |
|           | 1.24       | 1.54       | 1.68 |       |       |       |      |      |      |



|           |            |            |      |      |      |       |      |      |      |   |
|-----------|------------|------------|------|------|------|-------|------|------|------|---|
| GENE1358X | 16301_at   | 16301_at   | 1    | 0.27 | 0.27 | 0.25  | 1.04 | 2.08 | 2.49 |   |
|           | 1.51       | 2.55       | 2.44 |      |      |       |      |      |      |   |
| GENE1120X | 15594_s_at | 15594_s_at | 1    | 0.48 | 0.78 | 0.92  | 1.33 | 3.29 | 3.84 |   |
|           | 1.71       | 3.79       | 3.61 |      |      |       |      |      |      |   |
| GENE2030X | 18590_at   | 18590_at   | 1    | 0.07 | 0.58 | 0.8   | 1.18 | 2.91 | 3.48 | 2 |
|           | 3.47       | 3.35       |      |      |      |       |      |      |      |   |
| GENE472X  | 13450_at   | 13450_at   | 1    | 0.19 | 0.17 | 0.14  | 0.21 | 1.13 | 1.01 |   |
|           | 0.52       | 1.01       | 1.1  |      |      |       |      |      |      |   |
| GENE368X  | 13137_at   | 13137_at   | 1    | 0.57 | 0.6  | 0.63  | 0.84 | 2.03 | 2.73 |   |
|           | 1.02       | 2.38       | 2.59 |      |      |       |      |      |      |   |
| GENE2191X | 19132_at   | 19132_at   | 1    | 0.55 | 0.4  | 0.45  | 0.43 | 1.43 | 1.63 |   |
|           | 0.99       | 1.29       | 1.59 |      |      |       |      |      |      |   |
| GENE1856X | 18010_s_at | 18010_s_at | 1    | 0.29 | 0.41 | 0.5   | 0.58 | 0.99 | 1.3  |   |
|           | 0.67       | 0.76       | 1.23 |      |      |       |      |      |      |   |
| GENE1447X | 16524_at   | 16524_at   | 1    | 0.28 | 0.32 | 0.73  | 1.32 | 1.72 | 2.5  |   |
|           | 1.68       | 1.61       | 2.11 |      |      |       |      |      |      |   |
| GENE818X  | 14672_at   | 14672_at   | 1    | 0.57 | 0.87 | 1.16  | 1.79 | 2.4  | 2.8  |   |
|           | 1.15       | 2.27       | 2.67 |      |      |       |      |      |      |   |
| GENE1295X | 16083_at   | 16083_at   | 1    | 0.16 | 0.4  | 0.91  | 1.2  | 2.03 | 2.44 |   |
|           | 0.86       | 1.94       | 2.2  |      |      |       |      |      |      |   |
| GENE4X    | 11997_at   | 11997_at   | 1    | 0.57 | 0.4  | 0.25  | 0.93 | 1.56 | 1.75 |   |
|           | 1.07       | 1.58       | 1.38 |      |      |       |      |      |      |   |
| GENE813X  | 14663_s_at | 14663_s_at | 1    | 0.9  | 0.66 | 0.22  | 2    | 3    | 3.87 |   |
|           | 2.23       | 2.47       | 2.82 |      |      |       |      |      |      |   |
| GENE2422X | 19982_at   | 19982_at   | 1    | 0.79 | 0.49 | 0.62  | 1.77 | 2.38 | 2.99 |   |
|           | 1.79       | 2          | 2.38 |      |      |       |      |      |      |   |
| GENE2149X | 18948_s_at | 18948_s_at | 1    | 0.02 | 0.01 | -0.03 | 0.58 | 1.48 | 1.32 |   |
|           | 0.85       | 1.1        | 1.26 |      |      |       |      |      |      |   |
| GENE2201X | 19161_at   | 19161_at   | 1    | 0.28 | 0.38 | -0.13 | 0.37 | 1.35 | 1.1  |   |
|           | 0.97       | 1          | 1.13 |      |      |       |      |      |      |   |
| GENE1667X | 17376_at   | 17376_at   | 1    | 0.38 | 0.47 | 0.38  | 1.03 | 2.45 | 2.11 |   |
|           | 1.22       | 1.98       | 1.52 |      |      |       |      |      |      |   |
| GENE2647X | 20627_at   | 20627_at   | 1    | 0.15 | 0.27 | 0.15  | 0.5  | 1.01 | 0.7  |   |
|           | 0.39       | 0.92       | 0.66 |      |      |       |      |      |      |   |
| GENE1931X | 18241_at   | 18241_at   | 1    | 0    | 1.32 | 0.32  | 1.47 | 3.33 | 1.95 |   |
|           | 2.02       | 2.83       | 2.36 |      |      |       |      |      |      |   |
| GENE1722X | 17511_s_at | 17511_s_at | 1    | 0.48 | 1.48 | 3.82  | 2.17 | 2.7  | 5.15 |   |
|           | 4.76       | 5.99       | 6.11 |      |      |       |      |      |      |   |
| GENE2157X | 18963_at   | 18963_at   | 1    | 0.48 | 0.97 | 2.11  | 2.2  | 2.49 | 4.85 |   |
|           | 3.73       | 5.23       | 5.45 |      |      |       |      |      |      |   |
| GENE2535X | 20291_at   | 20291_at   | 1    | 0.25 | 0.58 | 1.14  | 0.9  | 1.42 | 2.27 |   |
|           | 1.78       | 2.56       | 2.8  |      |      |       |      |      |      |   |
| GENE2538X | 20297_at   | 20297_at   | 1    | 0.67 | 1.37 | 1.58  | 1.22 | 3.14 | 4.04 |   |
|           | 3.71       | 4.03       | 4.33 |      |      |       |      |      |      |   |
| GENE1822X | 17929_s_at | 17929_s_at | 1    | 0.1  | 0.4  | 1.17  | 0.55 | 1.65 | 2.34 |   |
|           | 1.83       | 2.22       | 2.31 |      |      |       |      |      |      |   |
| GENE2317X | 19638_at   | 19638_at   | 1    | 0.27 | 0.65 | 0.9   | 0.17 | 1.03 | 1.84 |   |
|           | 1.38       | 1.76       | 2    |      |      |       |      |      |      |   |
| GENE121X  | 12314_at   | 12314_at   | 1    | 2.26 | 1.26 | 2.32  | 1.41 | 3.64 | 3.87 |   |
|           | 2.8        | 4.23       | 4.51 |      |      |       |      |      |      |   |
| GENE2321X | 19642_at   | 19642_at   | 1    | 0.61 | 0.49 | 0.46  | 0.53 | 1    | 0.99 |   |
|           | 0.87       | 1.22       | 1.4  |      |      |       |      |      |      |   |
| GENE44X   | 12112_at   | 12112_at   | 1    | 0.57 | 0.63 | 0.68  | 0.35 | 1.1  | 1.01 |   |
|           | 0.69       | 1.23       | 1.37 |      |      |       |      |      |      |   |
| GENE1723X | 17516_at   | 17516_at   | 1    | 0.93 | 1.18 | 1.86  | 2.14 | 3    | 4.17 |   |
|           | 3.11       | 3.62       | 3.99 |      |      |       |      |      |      |   |

|           |            |            |      |      |      |      |      |      |      |
|-----------|------------|------------|------|------|------|------|------|------|------|
| GENE938X  | 15088_at   | 15088_at   | 1    | 0.73 | 0.8  | 1.01 | 1.08 | 1.54 | 2.58 |
|           | 2.03       | 2.48       | 2.71 |      |      |      |      |      |      |
| GENE2034X | 18596_at   | 18596_at   | 1    | 0.95 | 1.15 | 1.29 | 1.48 | 2.33 | 2.98 |
|           | 1.89       | 2.44       | 3.05 |      |      |      |      |      |      |
| GENE1140X | 15629_s_at | 15629_s_at | 1    | 0.73 | 0.97 | 1.2  | 0.87 | 1.88 | 2.19 |
|           | 1.63       | 2.18       | 2.44 |      |      |      |      |      |      |
| GENE561X  | 13666_s_at | 13666_s_at | 1    | 0.46 | 0.88 | 1.6  | 1.42 | 2.19 | 2.32 |
|           | 1.64       | 2.41       | 2.58 |      |      |      |      |      |      |
| GENE805X  | 14638_at   | 14638_at   | 1    | 0.44 | 0.55 | 1.2  | 1    | 1.76 | 1.65 |
|           | 1.37       | 1.87       | 1.67 |      |      |      |      |      |      |
| GENE1916X | 18194_i_at | 18194_i_at | 1    | 1.48 | 1.58 | 2.88 | 1.84 | 3.37 | 4.48 |
|           | 2.13       | 4.68       | 4.57 |      |      |      |      |      |      |
| GENE457X  | 13370_at   | 13370_at   | 1    | 1.26 | 1.37 | 2.76 | 2.26 | 4.94 | 5.51 |
|           | 2.76       | 5.45       | 4.88 |      |      |      |      |      |      |
| GENE1618X | 17111_s_at | 17111_s_at | 1    | 0.67 | 1.43 | 2.65 | 2.2  | 3.96 | 5.39 |
|           | 2.84       | 4.62       | 4.65 |      |      |      |      |      |      |
| GENE2492X | 20189_at   | 20189_at   | 1    | 0.28 | 0.68 | 1.43 | 0.96 | 2.15 | 2.52 |
|           | 1.61       | 3.3        | 2.65 |      |      |      |      |      |      |
| GENE696X  | 14367_at   | 14367_at   | 1    | 0    | 0.78 | 1.22 | 0.61 | 1.08 | 3.15 |
|           | 1.17       | 1.9        | 2.55 |      |      |      |      |      |      |
| GENE1010X | 15211_s_at | 15211_s_at | 1    | 0.1  | 0.3  | 0.77 | 0.34 | 0.54 | 1.46 |
|           | 0.5        | 1.1        | 1.27 |      |      |      |      |      |      |
| GENE1788X | 17824_s_at | 17824_s_at | 1    | 0.7  | 1.45 | 2.04 | 0.32 | 2.08 | 4.34 |
|           | 1.34       | 2.88       | 3.68 |      |      |      |      |      |      |
| GENE34X   | 12081_at   | 12081_at   | 1    | 1.02 | 1.38 | 1.61 | 0.52 | 1.92 | 3.45 |
|           | 0.73       | 2.8        | 2.8  |      |      |      |      |      |      |
| GENE278X  | 12851_s_at | 12851_s_at | 1    | 0    | 0.84 | 2.13 | 1    | 2.48 | 3.53 |
|           | 0.84       | 2.88       | 2.96 |      |      |      |      |      |      |
| GENE1713X | 17485_s_at | 17485_s_at | 1    | 1.67 | 1.26 | 2.13 | 1.36 | 3.53 | 5    |
|           | 2.13       | 4.68       | 6.38 |      |      |      |      |      |      |
| GENE1576X | 16995_at   | 16995_at   | 1    | 1.45 | 1.28 | 1.52 | 1.15 | 2.76 | 4.13 |
|           | 1.84       | 4.13       | 4.76 |      |      |      |      |      |      |
| GENE140X  | 12372_at   | 12372_at   | 1    | 0.44 | 1.04 | 1.38 | 0.58 | 1.9  | 2.6  |
|           | 1.37       | 2.51       | 3.44 |      |      |      |      |      |      |
| GENE1136X | 15622_s_at | 15622_s_at | 1    | 0.9  | 1.67 | 1.15 | 0.87 | 1.34 | 2.42 |
|           | 0.92       | 2.35       | 3.11 |      |      |      |      |      |      |
| GENE817X  | 14667_at   | 14667_at   | 1    | 0.63 | 0.93 | 1.16 | 0.55 | 0.86 | 1.5  |
|           | 0.94       | 1.5        | 2.15 |      |      |      |      |      |      |
| GENE1725X | 17521_at   | 17521_at   | 1    | 0.68 | 1.04 | 1.52 | 0.74 | 1.16 | 2.28 |
|           | 1.5        | 2.38       | 1.95 |      |      |      |      |      |      |
| GENE2668X | 20686_at   | 20686_at   | 1    | 0.65 | 1.78 | 1.98 | 0.28 | 2.16 | 2.61 |
|           | 1.62       | 3.14       | 3.19 |      |      |      |      |      |      |
| GENE2108X | 18782_at   | 18782_at   | 1    | 0.22 | 0.65 | 0.69 | 0.03 | 0.61 | 0.99 |
|           | 0.76       | 1.11       | 1.07 |      |      |      |      |      |      |
| GENE2279X | 19451_at   | 19451_at   | 1    | 0.26 | 1.48 | 1.48 | 0    | 4.97 | 5.71 |
|           | 3.88       | 7          | 6.68 |      |      |      |      |      |      |
| GENE2556X | 20356_at   | 20356_at   | 1    | 0    | 0    | 2    | 0.36 | 3.61 | 4.56 |
|           | 3.07       | 5.76       | 5.56 |      |      |      |      |      |      |
| GENE1003X | 15199_s_at | 15199_s_at | 1    | 0.22 | 0.3  | 0.18 | 0.36 | 1.37 | 1.6  |
|           | 0.85       | 2.2        | 2.53 |      |      |      |      |      |      |
| GENE1261X | 16027_s_at | 16027_s_at | 1    | 0.07 | 0.17 | 0.3  | 0.2  | 1    | 1.22 |
|           | 0.45       | 1.37       | 1.43 |      |      |      |      |      |      |
| GENE315X  | 13004_at   | 13004_at   | 1    | 0.35 | 0.58 | 0.56 | 0.21 | 1.09 | 1.25 |
|           | 0.91       | 1.81       | 1.79 |      |      |      |      |      |      |
| GENE711X  | 14417_at   | 14417_at   | 1    | 0.16 | 0.2  | 0.21 | 0.15 | 0.57 | 0.68 |
|           | 0.39       | 1.03       | 0.91 |      |      |      |      |      |      |



|           |            |            |      |       |       |       |      |      |      |
|-----------|------------|------------|------|-------|-------|-------|------|------|------|
| GENE1581X | 17007_at   | 17007_at   | 1    | 0.3   | 0.17  | 0.12  | 0.5  | 0.98 | 1.19 |
|           | 0.39       | 0.47       | 0.87 |       |       |       |      |      |      |
| GENE176X  | 12511_g_at | 12511_g_at | 1    | 0.23  | 0.15  | 0.03  | 0.61 | 1.11 | 1.54 |
|           | 0.18       | 0.41       | 0.81 |       |       |       |      |      |      |
| GENE1570X | 16980_at   | 16980_at   | 1    | 0     | 0.25  | 0.31  | 1.45 | 1.7  | 2.32 |
|           | 0.27       | 0.77       | 1.43 |       |       |       |      |      |      |
| GENE507X  | 13564_at   | 13564_at   | 1    | 0.1   | 0.23  | 0.37  | 1.21 | 2.13 | 2.38 |
|           | 0.3        | 1.11       | 1.36 |       |       |       |      |      |      |
| GENE1220X | 15911_at   | 15911_at   | 1    | 0.17  | 0.33  | 0.76  | 1.68 | 2.73 | 2.8  |
|           | 1.15       | 1.71       | 1.62 |       |       |       |      |      |      |
| GENE1204X | 15867_at   | 15867_at   | 1    | 0.32  | 0.16  | 0.24  | 0.73 | 1.18 | 1.38 |
|           | 0.64       | 0.62       | 0.74 |       |       |       |      |      |      |
| GENE1777X | 17744_s_at | 17744_s_at | 1    | 0.18  | -0.19 | 0.08  | 1.17 | 2.34 | 2.53 |
|           | 1.07       | 1.36       | 1.53 |       |       |       |      |      |      |
| GENE2295X | 19503_at   | 19503_at   | 1    | 0.07  | 0     | 0.24  | 0.51 | 1.22 | 1.36 |
|           | 0.53       | 0.74       | 0.72 |       |       |       |      |      |      |
| GENE590X  | 13850_i_at | 13850_i_at | 1    | -0.01 | 0.09  | 0.35  | 1    | 1    | 1.59 |
|           | 0.56       | 0.82       | 0.58 |       |       |       |      |      |      |
| GENE443X  | 13297_at   | 13297_at   | 1    | 0.36  | 0.31  | 0.82  | 1.08 | 1.79 | 2    |
|           | 0.77       | 0.93       | 0.97 |       |       |       |      |      |      |
| GENE1446X | 16522_at   | 16522_at   | 1    | 0.34  | 0.46  | 0.78  | 1.29 | 1.73 | 2.38 |
|           | 0.6        | 0.86       | 0.89 |       |       |       |      |      |      |
| GENE425X  | 13261_at   | 13261_at   | 1    | 0.12  | 0.34  | 0.45  | 0.68 | 1.48 | 1.72 |
|           | 0.48       | 0.74       | 0.8  |       |       |       |      |      |      |
| GENE2203X | 19169_g_at | 19169_g_at | 1    | 0.18  | 0.23  | 0.34  | 0.43 | 0.88 | 1.17 |
|           | 0.37       | 0.55       | 0.61 |       |       |       |      |      |      |
| GENE2377X | 19878_at   | 19878_at   | 1    | 0.29  | 0     | -0.23 | 2.32 | 2.87 | 3.73 |
|           | 1.12       | 1.61       | 1.71 |       |       |       |      |      |      |
| GENE1426X | 16483_at   | 16483_at   | 1    | 0.73  | 0.28  | 0.28  | 1.93 | 2.22 | 3.11 |
|           | 0.83       | 0.77       | 1.19 |       |       |       |      |      |      |
| GENE681X  | 14136_at   | 14136_at   | 1    | 0.52  | 0.03  | 0.34  | 1.26 | 1.45 | 1.81 |
|           | 0.48       | 0.88       | 0.74 |       |       |       |      |      |      |
| GENE1039X | 15379_at   | 15379_at   | 1    | 0.34  | 0.31  | 0.15  | 1.74 | 1.62 | 1.71 |
|           | 0.96       | 0.86       | 1.45 |       |       |       |      |      |      |
| GENE1563X | 16962_at   | 16962_at   | 1    | 0.04  | 0.13  | 0.25  | 0.89 | 0.84 | 1.08 |
|           | 0.55       | 0.47       | 0.73 |       |       |       |      |      |      |
| GENE2190X | 19130_at   | 19130_at   | 1    | 0.45  | 0.34  | 0.19  | 1.34 | 1.57 | 1.56 |
|           | 0.8        | 0.79       | 0.63 |       |       |       |      |      |      |
| GENE364X  | 13128_at   | 13128_at   | 1    | 0.25  | 0.64  | 0.72  | 1.07 | 2.62 | 2.38 |
|           | 0.82       | 1.22       | 1.1  |       |       |       |      |      |      |
| GENE998X  | 15188_s_at | 15188_s_at | 1    | 0.43  | 0.5   | 0.8   | 1.28 | 2.67 | 2.75 |
|           | 0.21       | 1.34       | 1.05 |       |       |       |      |      |      |
| GENE1184X | 15782_at   | 15782_at   | 1    | 0.25  | 0.5   | 0.35  | 0.64 | 1.6  | 1.56 |
|           | 0.14       | 0.58       | 0.6  |       |       |       |      |      |      |
| GENE335X  | 13069_at   | 13069_at   | 1    | 0.48  | 0.31  | 0.62  | 1.23 | 1.95 | 1.56 |
|           | 0.22       | 0.82       | 0.69 |       |       |       |      |      |      |
| GENE1957X | 18286_at   | 18286_at   | 1    | 0.28  | 0.19  | 0.14  | 0.78 | 1.08 | 0.9  |
|           | 0.21       | 0.41       | 0.54 |       |       |       |      |      |      |
| GENE737X  | 14481_at   | 14481_at   | 1    | 0.48  | 0.3   | 0.22  | 0.25 | 1.07 | 1    |
|           | 0.31       | 0.7        | 0.78 |       |       |       |      |      |      |
| GENE2259X | 19393_at   | 19393_at   | 1    | 0.47  | 0.14  | 0.4   | 0.33 | 1.06 | 0.87 |
|           | 0.1        | 0.61       | 0.59 |       |       |       |      |      |      |
| GENE585X  | 13825_s_at | 13825_s_at | 1    | 0.43  | 0.61  | 0.71  | 0.72 | 2.03 | 1.67 |
|           | 0.37       | 1.43       | 1.3  |       |       |       |      |      |      |
| GENE1999X | 18465_s_at | 18465_s_at | 1    | 0.58  | 0.78  | 0.74  | 0.87 | 2.36 | 1.83 |
|           | 0.56       | 1.89       | 1.17 |       |       |       |      |      |      |

|           |            |            |      |      |      |      |      |      |      |
|-----------|------------|------------|------|------|------|------|------|------|------|
| GENE2378X | 19879_at   | 19879_at   | 1    | 0.5  | 0.66 | 0.57 | 0.92 | 2.28 | 2.02 |
|           | 0.79       | 1.56       | 1.16 |      |      |      |      |      |      |
| GENE1823X | 17930_s_at | 17930_s_at | 1    | 1.62 | 0.85 | 1.09 | 1.43 | 1.88 | 2.64 |
|           | 0.44       | 1.61       | 2.47 |      |      |      |      |      |      |
| GENE2678X | 20718_at   | 20718_at   | 1    | 0.53 | 0.17 | 0.32 | 0.9  | 1.09 | 1.16 |
|           | 0.28       | 0.73       | 0.96 |      |      |      |      |      |      |
| GENE65X   | 12167_at   | 12167_at   | 1    | 1.02 | 0.93 | 0.74 | 1.34 | 2.01 | 1.72 |
|           | 1.02       | 1.33       | 1.3  |      |      |      |      |      |      |
| GENE1451X | 16532_at   | 16532_at   | 1    | 0.52 | 0.4  | 0.4  | 0.93 | 1.03 | 0.98 |
|           | 0.45       | 0.54       | 0.68 |      |      |      |      |      |      |
| GENE2372X | 19865_g_at | 19865_g_at | 1    | 0.93 | 0.61 | 0.68 | 0.98 | 1.07 | 1.14 |
|           | 0.73       | 0.62       | 0.78 |      |      |      |      |      |      |
| GENE721X  | 14448_at   | 14448_at   | 1    | 1.32 | 1.19 | 0.9  | 2.46 | 2.79 | 3.27 |
|           | 1.15       | 0.82       | 1.98 |      |      |      |      |      |      |
| GENE2159X | 18966_at   | 18966_at   | 1    | 0.73 | 1.4  | 1.83 | 1.57 | 2.32 | 3.36 |
|           | 1.04       | 2.31       | 2.67 |      |      |      |      |      |      |
| GENE2367X | 19845_g_at | 19845_g_at | 1    | 1.01 | 1.44 | 1.38 | 1.42 | 2.36 | 3.03 |
|           | 1.19       | 1.96       | 2.32 |      |      |      |      |      |      |
| GENE1245X | 15993_at   | 15993_at   | 1    | 0.44 | 0.83 | 0.74 | 0.69 | 1.08 | 1.58 |
|           | 0.67       | 0.84       | 1.31 |      |      |      |      |      |      |
| GENE1520X | 16747_at   | 16747_at   | 1    | 1.2  | 2.32 | 2.48 | 2.92 | 3.94 | 5.66 |
|           | 2.14       | 2.72       | 2.89 |      |      |      |      |      |      |
| GENE2193X | 19137_at   | 19137_at   | 1    | 0.89 | 1.16 | 1.93 | 2.07 | 2.99 | 3.84 |
|           | 1.34       | 2.2        | 2.49 |      |      |      |      |      |      |
| GENE2178X | 19060_at   | 19060_at   | 1    | 1.05 | 0.84 | 0.69 | 1.24 | 1.75 | 2.58 |
|           | 1.2        | 1.32       | 1.75 |      |      |      |      |      |      |
| GENE85X   | 12217_at   | 12217_at   | 1    | 0.42 | 0.54 | 0.36 | 0.75 | 1.25 | 1.3  |
|           | 0.58       | 0.74       | 1.09 |      |      |      |      |      |      |
| GENE360X  | 13123_at   | 13123_at   | 1    | 0.81 | 0.64 | 0.71 | 0.94 | 1.88 | 2.09 |
|           | 0.45       | 0.92       | 1.29 |      |      |      |      |      |      |
| GENE1776X | 17732_at   | 17732_at   | 1    | 0.6  | 0.46 | 0.53 | 0.63 | 1.49 | 1.79 |
|           | 0.36       | 0.8        | 1.01 |      |      |      |      |      |      |
| GENE2318X | 19639_at   | 19639_at   | 1    | 0.65 | 0.69 | 0.85 | 0.9  | 1.88 | 2.37 |
|           | 0.56       | 1.31       | 1.37 |      |      |      |      |      |      |
| GENE1691X | 17431_at   | 17431_at   | 1    | 0.47 | 0.53 | 0.49 | 0.55 | 1.3  | 1.44 |
|           | 0.42       | 0.76       | 0.8  |      |      |      |      |      |      |
| GENE797X  | 14620_at   | 14620_at   | 1    | 0.27 | 0.4  | 1.05 | 1.5  | 1.92 | 2.33 |
|           | 1.02       | 0.82       | 2.03 |      |      |      |      |      |      |
| GENE2316X | 19635_at   | 19635_at   | 1    | 0.36 | 0.77 | 0.41 | 1.72 | 2.48 | 2.2  |
|           | 1.17       | 1.65       | 1.79 |      |      |      |      |      |      |
| GENE75X   | 12187_at   | 12187_at   | 1    | 1.28 | 1.19 | 1.04 | 2.09 | 3.32 | 3.05 |
|           | 2.3        | 2.73       | 2.69 |      |      |      |      |      |      |
| GENE902X  | 15001_at   | 15001_at   | 1    | 0.47 | 0.52 | 0.43 | 1    | 1.79 | 1.27 |
|           | 0.8        | 1.23       | 1.2  |      |      |      |      |      |      |
| GENE1813X | 17905_at   | 17905_at   | 1    | 0.37 | 0.44 | 0.47 | 0.76 | 1.45 | 1.02 |
|           | 0.84       | 0.94       | 0.89 |      |      |      |      |      |      |
| GENE1132X | 15612_s_at | 15612_s_at | 1    | 0.2  | 0.81 | 0.95 | 1.52 | 2.31 | 2    |
|           | 1.24       | 1.21       | 1.14 |      |      |      |      |      |      |
| GENE1354X | 16288_at   | 16288_at   | 1    | 0.64 | 0.94 | 0.82 | 1.41 | 2.34 | 2.09 |
|           | 0.88       | 1.49       | 1.21 |      |      |      |      |      |      |
| GENE751X  | 14507_at   | 14507_at   | 1    | 0.34 | 0.55 | 0.55 | 0.89 | 1.41 | 1.31 |
|           | 0.43       | 0.97       | 0.96 |      |      |      |      |      |      |
| GENE1335X | 16203_at   | 16203_at   | 1    | 1.92 | 0.48 | 3.03 | 2.13 | 4.58 | 5.48 |
|           | 1.77       | 3.73       | 3.81 |      |      |      |      |      |      |
| GENE1454X | 16537_s_at | 16537_s_at | 1    | 0.46 | 0.46 | 1.22 | 0.41 | 1.75 | 2.01 |
|           | 0.72       | 1.2        | 1.39 |      |      |      |      |      |      |

|           |            |            |      |      |      |      |      |      |      |
|-----------|------------|------------|------|------|------|------|------|------|------|
| GENE319X  | 13014_at   | 13014_at   | 1    | 0.99 | 1    | 1.37 | 1.12 | 2.86 | 2.5  |
|           | 1.97       | 2.74       | 2.23 |      |      |      |      |      |      |
| GENE999X  | 15192_at   | 15192_at   | 1    | 0.52 | 0.85 | 1.13 | 1.14 | 2.06 | 2.06 |
|           | 1.55       | 1.79       | 1.56 |      |      |      |      |      |      |
| GENE2143X | 18936_at   | 18936_at   | 1    | 0.86 | 0.81 | 1.46 | 1.69 | 3.37 | 3.44 |
|           | 1.89       | 2.45       | 2.26 |      |      |      |      |      |      |
| GENE2677X | 20715_at   | 20715_at   | 1    | 0.32 | 0.57 | 0.69 | 0.69 | 1.6  | 1.51 |
|           | 0.76       | 1.39       | 1.23 |      |      |      |      |      |      |
| GENE1833X | 17955_at   | 17955_at   | 1    | 0.59 | 0.67 | 0.89 | 0.89 | 1.86 | 1.82 |
|           | 0.75       | 1.48       | 1.2  |      |      |      |      |      |      |
| GENE2501X | 20200_at   | 20200_at   | 1    | 0.53 | 0.75 | 1.15 | 0.71 | 1.8  | 1.63 |
|           | 1.16       | 1.21       | 1.39 |      |      |      |      |      |      |
| GENE325X  | 13025_at   | 13025_at   | 1    | 0.33 | 0.58 | 0.73 | 0.67 | 1.26 | 1.59 |
|           | 1.03       | 0.87       | 1.03 |      |      |      |      |      |      |
| GENE2085X | 18698_s_at | 18698_s_at | 1    | 0.54 | 0.67 | 0.61 | 0.92 | 1.52 | 1.29 |
|           | 0.47       | 1.26       | 1.36 |      |      |      |      |      |      |
| GENE317X  | 13009_i_at | 13009_i_at | 1    | 1.11 | 2.5  | 2.56 | 2.8  | 4.2  | 3.37 |
|           | 2.07       | 4.2        | 3.13 |      |      |      |      |      |      |
| GENE714X  | 14423_at   | 14423_at   | 1    | 0.47 | 1.35 | 0.97 | 1.52 | 3.09 | 2.03 |
|           | 1.24       | 2.2        | 1.52 |      |      |      |      |      |      |
| GENE742X  | 14490_at   | 14490_at   | 1    | 0.72 | 1.35 | 1.5  | 1    | 2.14 | 1.59 |
|           | 0.62       | 1.41       | 1.78 |      |      |      |      |      |      |
| GENE896X  | 14988_at   | 14988_at   | 1    | 1.45 | 1.91 | 1.89 | 1.85 | 3.06 | 2.58 |
|           | 0.93       | 1.86       | 1.96 |      |      |      |      |      |      |
| GENE129X  | 12341_s_at | 12341_s_at | 1    | 1.39 | 1.41 | 1.43 | 1.26 | 2.53 | 2.21 |
|           | 0.88       | 1.35       | 1.44 |      |      |      |      |      |      |
| GENE1122X | 15596_s_at | 15596_s_at | 1    | 0.49 | 0.54 | 0.64 | 0.4  | 1.24 | 0.78 |
|           | 0.27       | 0.65       | 0.61 |      |      |      |      |      |      |
| GENE1879X | 18054_at   | 18054_at   | 1    | 1.5  | 2.84 | 3.14 | 2.73 | 4.65 | 4.81 |
|           | 1.58       | 3.34       | 3.34 |      |      |      |      |      |      |
| GENE485X  | 13534_at   | 13534_at   | 1    | 0.28 | 0.74 | 0.76 | 0.63 | 1.48 | 1.4  |
|           | 0.2        | 0.92       | 0.87 |      |      |      |      |      |      |
| GENE1791X | 17851_at   | 17851_at   | 1    | 0.26 | 0.51 | 0.56 | 0.35 | 1    | 1.03 |
|           | 0.28       | 0.76       | 0.73 |      |      |      |      |      |      |
| GENE1974X | 18315_s_at | 18315_s_at | 1    | 0.44 | 0.23 | 0.01 | 1.24 | 1.44 | 1.13 |
|           | 1.35       | 1.21       | 1.21 |      |      |      |      |      |      |
| GENE624X  | 13999_at   | 13999_at   | 1    | 1.49 | 1.3  | 1.01 | 2.12 | 2.48 | 2.03 |
|           | 2.52       | 2.68       | 2.05 |      |      |      |      |      |      |
| GENE1973X | 18314_i_at | 18314_i_at | 1    | 0.83 | 0.7  | 0.56 | 1.31 | 1.65 | 1.35 |
|           | 1.6        | 1.42       | 1.43 |      |      |      |      |      |      |
| GENE1645X | 17280_at   | 17280_at   | 1    | 0.84 | 0.27 | 0.36 | 0.87 | 0.9  | 1.25 |
|           | 1.15       | 1.09       | 0.87 |      |      |      |      |      |      |
| GENE2131X | 18898_s_at | 18898_s_at | 1    | 0.55 | 0.5  | 0.51 | 1.37 | 1.27 | 0.95 |
|           | 1.23       | 1.12       | 0.94 |      |      |      |      |      |      |
| GENE927X  | 15065_at   | 15065_at   | 1    | 0.45 | 0.38 | 0.42 | 1.01 | 0.79 | 0.79 |
|           | 0.93       | 0.62       | 0.54 |      |      |      |      |      |      |
| GENE1665X | 17371_at   | 17371_at   | 1    | 1.93 | 2.22 | 2    | 1.92 | 3.8  | 0.92 |
|           | 3.35       | 3.87       | 2.83 |      |      |      |      |      |      |
| GENE1593X | 17044_at   | 17044_at   | 1    | 0.53 | 0.68 | 0.73 | 0.79 | 0.93 | 0.58 |
|           | 1.31       | 0.9        | 0.52 |      |      |      |      |      |      |
| GENE174X  | 12500_s_at | 12500_s_at | 1    | 0.6  | 0.7  | 2.13 | 1.99 | 2.38 | 2.72 |
|           | 2.26       | 2.29       | 1.97 |      |      |      |      |      |      |
| GENE2074X | 18681_at   | 18681_at   | 1    | 0.44 | 0.36 | 1.03 | 0.96 | 1.34 | 1.69 |
|           | 1.46       | 1.32       | 0.94 |      |      |      |      |      |      |
| GENE2306X | 19591_at   | 19591_at   | 1    | 0.54 | 0.64 | 1.48 | 1.97 | 1.48 | 2.03 |
|           | 1.52       | 1.46       | 1.13 |      |      |      |      |      |      |

|           |            |            |      |       |      |      |      |      |      |
|-----------|------------|------------|------|-------|------|------|------|------|------|
| GENE803X  | 14635_s_at | 14635_s_at | 1    | 3.98  | 1.58 | 3.45 | 4.73 | 5.27 | 3.48 |
|           | 3.35       | 4.48       | 3.39 |       |      |      |      |      |      |
| GENE194X  | 12562_at   | 12562_at   | 1    | 0.75  | 0.78 | 0.72 | 1.25 | 1.85 | 1.05 |
|           | 1.05       | 0.85       | 0.66 |       |      |      |      |      |      |
| GENE988X  | 15171_s_at | 15171_s_at | 1    | 0.84  | 0.89 | 0.97 | 1.23 | 1.56 | 1.02 |
|           | 1.1        | 0.78       | 0.55 |       |      |      |      |      |      |
| GENE668X  | 14089_at   | 14089_at   | 1    | -0.63 | 0.87 | 1.97 | 2.45 | 2.92 | 1.89 |
|           | 4.28       | 4.8        | 3.43 |       |      |      |      |      |      |
| GENE903X  | 15005_s_at | 15005_s_at | 1    | -0.19 | 1.12 | 2.17 | 1.8  | 2.39 | 3.35 |
|           | 3.29       | 4.01       | 3.51 |       |      |      |      |      |      |
| GENE1926X | 18224_s_at | 18224_s_at | 1    | -0.09 | 1.41 | 2.24 | 1.34 | 2.48 | 2.69 |
|           | 3.6        | 4.04       | 2.74 |       |      |      |      |      |      |
| GENE1794X | 17860_at   | 17860_at   | 1    | 0     | 0.51 | 1.8  | 1.9  | 1.78 | 2.85 |
|           | 3.94       | 3.73       | 3.25 |       |      |      |      |      |      |
| GENE1118X | 15586_s_at | 15586_s_at | 1    | 0.03  | 0.49 | 0.72 | 1.13 | 1.25 | 1.79 |
|           | 2.09       | 2.08       | 2.13 |       |      |      |      |      |      |
| GENE2600X | 20479_i_at | 20479_i_at | 1    | -0.67 | 1.28 | 1.28 | 1.5  | 2.18 | 2.58 |
|           | 2.19       | 3.37       | 4.01 |       |      |      |      |      |      |
| GENE2601X | 20480_s_at | 20480_s_at | 1    | -0.85 | 1.27 | 1.45 | 1.11 | 1.66 | 2    |
|           | 1.48       | 2.56       | 2.94 |       |      |      |      |      |      |
| GENE405X  | 13217_s_at | 13217_s_at | 1    | -0.04 | 1.57 | 1.67 | 1.15 | 1.67 | 1.51 |
|           | 2.25       | 2.27       | 2.97 |       |      |      |      |      |      |
| GENE2505X | 20215_s_at | 20215_s_at | 1    | -0.08 | 0.44 | 0.33 | 0.28 | 0.48 | 0.55 |
|           | 0.83       | 0.94       | 1.18 |       |      |      |      |      |      |
| GENE1356X | 16298_at   | 16298_at   | 1    | 0.92  | 3.12 | 3.15 | 3.26 | 3.65 | 3.26 |
|           | 5.81       | 5.54       | 3.78 |       |      |      |      |      |      |
| GENE1283X | 16063_s_at | 16063_s_at | 1    | 0.09  | 3.45 | 5.1  | 3.98 | 5    | 4.34 |
|           | 4.67       | 5.76       | 5.04 |       |      |      |      |      |      |
| GENE1558X | 16952_s_at | 16952_s_at | 1    | 0.53  | 1.44 | 1.39 | 0.71 | 1.27 | 1    |
|           | 1.38       | 1.38       | 1.38 |       |      |      |      |      |      |
| GENE1557X | 16951_i_at | 16951_i_at | 1    | 0.2   | 0.82 | 0.81 | 0.45 | 0.92 | 0.76 |
|           | 1.01       | 0.74       | 1.01 |       |      |      |      |      |      |
| GENE1079X | 15485_at   | 15485_at   | 1    | 0.06  | 0.96 | 2.75 | 1.22 | 1.58 | 1.31 |
|           | 2.53       | 3.03       | 1.9  |       |      |      |      |      |      |
| GENE2184X | 19110_s_at | 19110_s_at | 1    | -0.26 | 2    | 2.58 | 0.29 | 1.82 | 1.65 |
|           | 2.64       | 3.24       | 1.85 |       |      |      |      |      |      |
| GENE1249X | 16003_s_at | 16003_s_at | 1    | 0.97  | 1.17 | 1.17 | 0.69 | 2.42 | 2.19 |
|           | 1.07       | 2.34       | 2.03 |       |      |      |      |      |      |
| GENE2583X | 20434_at   | 20434_at   | 1    | 0.51  | 0.48 | 0.55 | 0.46 | 1.31 | 0.97 |
|           | 0.38       | 1.51       | 1.26 |       |      |      |      |      |      |
| GENE2615X | 20529_at   | 20529_at   | 1    | 0.25  | 0.74 | 0.78 | 0.73 | 2.1  | 1.65 |
|           | 0.68       | 1.92       | 1.35 |       |      |      |      |      |      |
| GENE1301X | 16103_s_at | 16103_s_at | 1    | 0.41  | 0.54 | 0.66 | 0.45 | 1.56 | 1.15 |
|           | 0.66       | 1.66       | 1.06 |       |      |      |      |      |      |
| GENE400X  | 13205_at   | 13205_at   | 1    | 0.19  | 0.34 | 0.31 | 0.31 | 1.24 | 0.81 |
|           | 0.58       | 1.13       | 0.87 |       |      |      |      |      |      |
| GENE2127X | 18889_at   | 18889_at   | 1    | 1.23  | 1.58 | 1.94 | 0.8  | 2.83 | 2.7  |
|           | 2.58       | 3.45       | 3.17 |       |      |      |      |      |      |
| GENE2475X | 20144_at   | 20144_at   | 1    | 0.53  | 1.88 | 1.7  | 0.54 | 2.57 | 2.59 |
|           | 2.38       | 3.38       | 3.19 |       |      |      |      |      |      |
| GENE878X  | 14924_at   | 14924_at   | 1    | 0.41  | 2.16 | 2.39 | 0.91 | 2.91 | 2.8  |
|           | 2.5        | 3.16       | 2.99 |       |      |      |      |      |      |
| GENE1783X | 17775_at   | 17775_at   | 1    | 1.11  | 2.84 | 3.53 | 1.36 | 3.69 | 3.37 |
|           | 2.8        | 5.05       | 4.12 |       |      |      |      |      |      |
| GENE427X  | 13267_at   | 13267_at   | 1    | 0.49  | 0.66 | 0.74 | 0.09 | 0.99 | 0.79 |
|           | 0.73       | 1.16       | 1    |       |      |      |      |      |      |

|           |            |            |      |       |      |      |       |      |      |
|-----------|------------|------------|------|-------|------|------|-------|------|------|
| GENE1784X | 17781_at   | 17781_at   | 1    | 0.86  | 2.26 | 2.29 | 1.75  | 3.91 | 3.62 |
|           | 2.71       | 4.19       | 3.73 |       |      |      |       |      |      |
| GENE1987X | 18357_at   | 18357_at   | 1    | 1     | 1.76 | 1.58 | 1.48  | 3.13 | 2.48 |
|           | 2.48       | 3.35       | 2.53 |       |      |      |       |      |      |
| GENE2481X | 20159_at   | 20159_at   | 1    | 0.54  | 0.93 | 0.7  | 0.65  | 1.66 | 1.37 |
|           | 1.13       | 1.83       | 1.27 |       |      |      |       |      |      |
| GENE926X  | 15063_at   | 15063_at   | 1    | 0.08  | 0.53 | 0.75 | 0.46  | 1.03 | 0.95 |
|           | 0.77       | 1.2        | 1.38 |       |      |      |       |      |      |
| GENE572X  | 13703_at   | 13703_at   | 1    | -0.16 | 1.78 | 2    | 0.58  | 2.67 | 1.92 |
|           | 1.45       | 3.08       | 2.9  |       |      |      |       |      |      |
| GENE958X  | 15120_at   | 15120_at   | 1    | 0.48  | 2.07 | 1.58 | 0.66  | 4.27 | 2.34 |
|           | 2.88       | 5.54       | 4.03 |       |      |      |       |      |      |
| GENE2142X | 18935_at   | 18935_at   | 1    | 0     | 0.82 | 1.58 | 0.34  | 2    | 1.71 |
|           | 1.84       | 3.4        | 2.13 |       |      |      |       |      |      |
| GENE1117X | 15582_s_at | 15582_s_at | 1    | 0.47  | 0.85 | 1.17 | 0.06  | 1.63 | 1.34 |
|           | 1.44       | 2.63       | 2.15 |       |      |      |       |      |      |
| GENE170X  | 12487_at   | 12487_at   | 1    | 0.26  | 1    | 0.67 | 1.32  | 3.34 | 2.9  |
|           | 2.49       | 3.3        | 2.12 |       |      |      |       |      |      |
| GENE2363X | 19835_at   | 19835_at   | 1    | 0.07  | 0.65 | 0.56 | 0.45  | 1.21 | 1.3  |
|           | 1.08       | 1.51       | 0.84 |       |      |      |       |      |      |
| GENE301X  | 12951_at   | 12951_at   | 1    | 0.28  | 0.48 | 0.38 | 0.45  | 1.11 | 1.14 |
|           | 0.55       | 1.06       | 0.34 |       |      |      |       |      |      |
| GENE2112X | 18820_at   | 18820_at   | 1    | 0.05  | 0.93 | 0.82 | 0.27  | 1.42 | 0.97 |
|           | 0.8        | 1.22       | 0.94 |       |      |      |       |      |      |
| GENE1781X | 17758_at   | 17758_at   | 1    | 1.29  | 2.88 | 1.72 | 1.2   | 3.6  | 2.18 |
|           | 2.53       | 3.3        | 2.73 |       |      |      |       |      |      |
| GENE282X  | 12879_at   | 12879_at   | 1    | 0.67  | 2.08 | 1.77 | 1.07  | 2.82 | 2.1  |
|           | 1.66       | 2.57       | 2.01 |       |      |      |       |      |      |
| GENE1910X | 18166_at   | 18166_at   | 1    | 0     | 3.82 | 2.32 | 2.42  | 4.91 | 3.24 |
|           | 3.09       | 3.7        | 2.27 |       |      |      |       |      |      |
| GENE1495X | 16635_s_at | 16635_s_at | 1    | 0.31  | 1.13 | 1.18 | 0.86  | 1.89 | 1.12 |
|           | 1.38       | 1.48       | 1.18 |       |      |      |       |      |      |
| GENE746X  | 14498_at   | 14498_at   | 1    | 0.43  | 0.79 | 0.46 | 0.16  | 1.48 | 0.85 |
|           | 0.63       | 1          | 0.72 |       |      |      |       |      |      |
| GENE2480X | 20156_at   | 20156_at   | 1    | 0.53  | 1.06 | 0.72 | 0.68  | 1.96 | 0.91 |
|           | 1.14       | 1.55       | 0.78 |       |      |      |       |      |      |
| GENE772X  | 14552_s_at | 14552_s_at | 1    | 1.92  | 1.26 | 1.13 | 0.84  | 4.18 | 1.84 |
|           | 2.06       | 3.25       | 1.39 |       |      |      |       |      |      |
| GENE515X  | 13584_at   | 13584_at   | 1    | 0.52  | 0.57 | 0.28 | 0.1   | 1.42 | 0.7  |
|           | 0.42       | 1.25       | 0.89 |       |      |      |       |      |      |
| GENE964X  | 15130_s_at | 15130_s_at | 1    | 0.45  | 0.23 | 0.27 | 0.09  | 1.07 | 0.44 |
|           | 0.49       | 0.88       | 0.61 |       |      |      |       |      |      |
| GENE2048X | 18625_at   | 18625_at   | 1    | 0.54  | 0.31 | 0.31 | -0.02 | 1.05 | 0.68 |
|           | 0.9        | 1.13       | 0.92 |       |      |      |       |      |      |
| GENE882X  | 14931_at   | 14931_at   | 1    | 0.48  | 3.13 | 1    | 0.7   | 4.83 | 1.04 |
|           | 3.45       | 5.49       | 2.84 |       |      |      |       |      |      |
| GENE578X  | 13789_at   | 13789_at   | 1    | -0.18 | 1.65 | 0.95 | 0.24  | 3.8  | 1.12 |
|           | 2.82       | 5          | 2.18 |       |      |      |       |      |      |
| GENE224X  | 12711_f_at | 12711_f_at | 1    | 0     | 2.26 | 1.37 | 0.15  | 3.55 | 1.53 |
|           | 2.52       | 3.68       | 2.2  |       |      |      |       |      |      |
| GENE223X  | 12710_i_at | 12710_i_at | 1    | 0     | 2.07 | 1    | 0.73  | 3.48 | 1.93 |
|           | 1.85       | 3.19       | 1.45 |       |      |      |       |      |      |
| GENE2581X | 20432_at   | 20432_at   | 1    | 2     | 1.84 | 2.32 | 0.84  | 3.17 | 3.86 |
|           | 3.63       | 3.65       |      |       |      |      |       |      | 0    |
| GENE1810X | 17899_at   | 17899_at   | 1    | 1.5   | 1.72 | 1.6  | 1.21  | 2.24 | 3.07 |
|           | 0.66       | 2.71       | 3.32 |       |      |      |       |      |      |





|           |            |            |   |          |       |      |       |      |      |
|-----------|------------|------------|---|----------|-------|------|-------|------|------|
| GENE940X  | 15091_at   | 15091_at   | 1 | -0.00709 | 1.08  | 1.23 | -0.32 | 1.78 |      |
|           | 1.37       | -0.15 1.7  |   |          |       |      |       |      |      |
|           | 1.59       |            |   |          |       |      |       |      |      |
| GENE2124X | 18885_at   | 18885_at   | 1 | 0.73     | 1.3   | 1.68 | 0.13  | 1.77 | 1.77 |
|           | 0.06       | 2.51 1.76  |   |          |       |      |       |      |      |
| GENE354X  | 13116_at   | 13116_at   | 1 | 0.46     | 0.56  | 0.64 | -0.13 | 0.95 | 0.64 |
|           | 0.02       | 1.18 1.03  |   |          |       |      |       |      |      |
| GENE1513X | 16701_at   | 16701_at   | 1 | 0        | 0     | 1.26 | 0.84  | 3.56 | 3.63 |
|           | 2.26       | 4.75 3.1   |   |          |       |      |       |      |      |
| GENE277X  | 12846_s_at | 12846_s_at | 1 | 0.01     | 0.13  | 0.68 | 0.29  | 1.37 | 1.2  |
|           | 0.72       | 1.89 0.91  |   |          |       |      |       |      |      |
| GENE2356X | 19803_s_at | 19803_s_at | 1 | 0        | 0     | 0.84 | 0     | 2.07 | 2.58 |
|           | 1.37       | 3.74 1.37  |   |          |       |      |       |      |      |
| GENE1351X | 16272_at   | 16272_at   | 1 | -0.37    | -0.24 | 2.02 | -0.36 | 2.38 | 2.22 |
|           | 0.83       | 2.66 1.32  |   |          |       |      |       |      |      |
| GENE1941X | 18262_at   | 18262_at   | 1 | 0.34     | 0.39  | 0.47 | 0.06  | 0.84 | 1.05 |
|           | 0.2        | 0.73 0.54  |   |          |       |      |       |      |      |
| GENE758X  | 14520_at   | 14520_at   | 1 | 0.14     | 0.27  | 0.32 | -0.11 | 0.99 | 1.68 |
|           | 0.4        | 0.85 0.69  |   |          |       |      |       |      |      |
| GENE1644X | 17279_at   | 17279_at   | 1 | 0        | 0.84  | 1.76 | 0     | 4.49 | 5.06 |
|           | 4.07       | 4.58       |   |          |       |      |       |      | 1    |
| GENE2266X | 19411_at   | 19411_at   | 1 | 0.35     | 0.62  | 1.22 | 0.57  | 2.38 | 2.45 |
|           | 0.69       | 2.21 2.26  |   |          |       |      |       |      |      |
| GENE397X  | 13190_s_at | 13190_s_at | 1 | 0.06     | 0.23  | 0.36 | 0.28  | 1.19 | 1.2  |
|           | 0.48       | 1.07 1.03  |   |          |       |      |       |      |      |
| GENE1225X | 15924_at   | 15924_at   | 1 | 0.25     | 0.13  | 1.1  | 0.23  | 2.38 | 2.37 |
|           | 0.51       | 1.38 1.7   |   |          |       |      |       |      |      |
| GENE435X  | 13279_at   | 13279_at   | 1 | -0.48    | 0.89  | 1.08 | 0.83  | 4.17 | 3.33 |
|           | 1.54       | 3.01 2.66  |   |          |       |      |       |      |      |
| GENE132X  | 12347_at   | 12347_at   | 1 | 0.18     | 0.59  | 0.57 | 0.39  | 1.84 | 1.61 |
|           | 0.47       | 1.2 0.93   |   |          |       |      |       |      |      |
| GENE968X  | 15136_s_at | 15136_s_at | 1 | 0.12     | 0.48  | 0.42 | 0.21  | 1.17 | 1.1  |
|           | 0.28       | 0.76 0.84  |   |          |       |      |       |      |      |
| GENE2035X | 18597_at   | 18597_at   | 1 | 1.77     | 2.15  | 2.23 | 2.37  | 3.08 | 3.38 |
|           | 1.27       | 2.42 2.75  |   |          |       |      |       |      |      |
| GENE602X  | 13908_s_at | 13908_s_at | 1 | 1.7      | 1.9   | 2.21 | 1.94  | 2.57 | 3.21 |
|           | 1.25       | 2.15 2.64  |   |          |       |      |       |      |      |
| GENE2366X | 19844_at   | 19844_at   | 1 | 1.45     | 1.97  | 2.1  | 1.56  | 2.36 | 2.96 |
|           | 1.26       | 1.84 2.34  |   |          |       |      |       |      |      |
| GENE1789X | 17840_at   | 17840_at   | 1 | 2.48     | 2.05  | 3.48 | 2.61  | 4.31 | 4.22 |
|           | 2.24       | 3.4 3.26   |   |          |       |      |       |      |      |
| GENE1342X | 16230_at   | 16230_at   | 1 | 1.07     | 1.16  | 1.42 | 1.32  | 1.85 | 2.12 |
|           | 1.01       | 1.3 1.25   |   |          |       |      |       |      |      |
| GENE9X    | 12004_at   | 12004_at   | 1 | 1.53     | 1.78  | 1.63 | 2.24  | 1.86 | 2.88 |
|           | 1.67       | 1.67 2.04  |   |          |       |      |       |      |      |
| GENE1863X | 18022_at   | 18022_at   | 1 | 1        | 1.59  | 1.8  | 2.07  | 2.54 | 3.05 |
|           | 1.53       | 1.36 2.18  |   |          |       |      |       |      |      |
| GENE11X   | 12007_at   | 12007_at   | 1 | 0.96     | 1.37  | 1.13 | 1.54  | 2.17 | 2.39 |
|           | 1.3        | 1.2 1.51   |   |          |       |      |       |      |      |
| GENE2382X | 19883_at   | 19883_at   | 1 | 1.22     | 2.27  | 2.6  | 2.53  | 4.12 | 3.44 |
|           | 2.73       | 3.08 3.28  |   |          |       |      |       |      |      |
| GENE846X  | 14750_s_at | 14750_s_at | 1 | 2.2      | 2.96  | 2.96 | 2.84  | 4.58 | 4.15 |
|           | 3.07       | 3.98 3.14  |   |          |       |      |       |      |      |
| GENE2319X | 19640_at   | 19640_at   | 1 | 1.98     | 2.86  | 3.9  | 2.51  | 4.21 | 5.03 |
|           | 3.19       | 4.15 4.09  |   |          |       |      |       |      |      |
| GENE1075X | 15479_at   | 15479_at   | 1 | 0.63     | 0.93  | 1.01 | 0.72  | 1.36 | 1.41 |
|           | 0.85       | 1.14 1.06  |   |          |       |      |       |      |      |

|           |            |            |      |      |      |      |      |      |      |
|-----------|------------|------------|------|------|------|------|------|------|------|
| GENE724X  | 14455_at   | 14455_at   | 1    | 1    | 1.58 | 1.61 | 1.43 | 2.45 | 2.26 |
|           | 1.48       | 1.76       | 1.07 |      |      |      |      |      |      |
| GENE807X  | 14643_s_at | 14643_s_at | 1    | 1.14 | 1.47 | 1.93 | 0.66 | 1.65 | 2.04 |
|           | 2.13       | 1.43       | 1.62 |      |      |      |      |      |      |
| GENE1571X | 16981_s_at | 16981_s_at | 1    | 0.8  | 1.26 | 1.91 | 0.89 | 1.61 | 1.77 |
|           | 1.4        | 1.5        | 1.37 |      |      |      |      |      |      |
| GENE396X  | 13189_s_at | 13189_s_at | 1    | 0.74 | 1.17 | 2.09 | 0.97 | 1.94 | 1.85 |
|           | 1.46       | 1.55       | 1.23 |      |      |      |      |      |      |
| GENE394X  | 13187_i_at | 13187_i_at | 1    | 0.93 | 1.3  | 2.06 | 0.79 | 1.6  | 1.62 |
|           | 1.2        | 1.23       | 1.15 |      |      |      |      |      |      |
| GENE1582X | 17008_at   | 17008_at   | 1    | 0.87 | 1.67 | 3.12 | 1.74 | 2.55 | 2.65 |
|           | 1.82       | 1.82       | 1.56 |      |      |      |      |      |      |
| GENE395X  | 13188_r_at | 13188_r_at | 1    | 0.69 | 0.91 | 1.7  | 0.78 | 1.55 | 1.46 |
|           | 0.91       | 0.67       | 0.78 |      |      |      |      |      |      |
| GENE1344X | 16235_at   | 16235_at   | 1    | 1.32 | 1.67 | 2.37 | 0.83 | 1.94 | 3.18 |
|           | 0.94       | 1.46       | 1.54 |      |      |      |      |      |      |
| GENE726X  | 14460_at   | 14460_at   | 1    | 0.51 | 0.86 | 1.13 | 0.74 | 1.1  | 1.78 |
|           | 0.73       | 0.89       | 0.98 |      |      |      |      |      |      |
| GENE892X  | 14980_at   | 14980_at   | 1    | 0.29 | 0.8  | 1.31 | 0.37 | 0.67 | 1.41 |
|           | 0.41       | 0.76       | 0.76 |      |      |      |      |      |      |
| GENE2595X | 20462_at   | 20462_at   | 1    | 2.01 | 2.66 | 2.33 | 1.17 | 2.58 | 1.8  |
|           | 1.81       | 2.96       | 2.21 |      |      |      |      |      |      |
| GENE1702X | 17458_at   | 17458_at   | 1    | 1.2  | 1.63 | 1.6  | 0.54 | 1.75 | 1.38 |
|           | 1.09       | 2.04       | 1.5  |      |      |      |      |      |      |
| GENE430X  | 13273_at   | 13273_at   | 1    | 2.27 | 3.1  | 3.39 | 2.06 | 3.78 | 3.24 |
|           | 2.74       | 3.68       | 3.24 |      |      |      |      |      |      |
| GENE2526X | 20269_at   | 20269_at   | 1    | 3.74 | 4.16 | 4.45 | 1.81 | 4.34 | 4.18 |
|           | 3.31       | 5.29       | 5.3  |      |      |      |      |      |      |
| GENE2207X | 19178_at   | 19178_at   | 1    | 0.77 | 1.01 | 0.84 | 0.55 | 1.05 | 0.82 |
|           | 0.84       | 1.31       | 1.33 |      |      |      |      |      |      |
| GENE363X  | 13127_s_at | 13127_s_at | 1    | 0.69 | 0.79 | 0.83 | 0.48 | 0.93 | 0.73 |
|           | 0.94       | 1.26       | 1.11 |      |      |      |      |      |      |
| GENE1832X | 17952_at   | 17952_at   | 1    | 0.62 | 1.01 | 0.94 | 0.55 | 1.16 | 1.12 |
|           | 1.2        | 1.38       | 1.2  |      |      |      |      |      |      |
| GENE377X  | 13154_s_at | 13154_s_at | 1    | 1.72 | 3.32 | 3.64 | 1.33 | 2.6  | 2.68 |
|           | 2.71       | 4.24       | 4.48 |      |      |      |      |      |      |
| GENE621X  | 13966_at   | 13966_at   | 1    | 1.28 | 1.7  | 1.91 | 0.6  | 1.05 | 1.54 |
|           | 1.39       | 1.81       | 2.09 |      |      |      |      |      |      |
| GENE675X  | 14116_at   | 14116_at   | 1    | 1.13 | 1.46 | 1.54 | 0.6  | 1.05 | 1.17 |
|           | 1.05       | 1.41       | 1.54 |      |      |      |      |      |      |
| GENE1042X | 15384_at   | 15384_at   | 1    | 1.47 | 1.45 | 1.65 | 0.31 | 1.72 | 1.55 |
|           | 0.87       | 2.17       | 2.78 |      |      |      |      |      |      |
| GENE888X  | 14959_at   | 14959_at   | 1    | 2.04 | 2.17 | 2.24 | 0.58 | 2.3  | 2.32 |
|           | 1.15       | 2.41       | 2.69 |      |      |      |      |      |      |
| GENE2523X | 20261_at   | 20261_at   | 1    | 0.83 | 0.87 | 0.86 | 0.19 | 0.87 | 0.7  |
|           | 0.36       | 1.09       | 0.99 |      |      |      |      |      |      |
| GENE1014X | 15216_at   | 15216_at   | 1    | 1.7  | 1.84 | 1.69 | 0.82 | 1.6  | 1.8  |
|           | 0.77       | 1.69       | 1.76 |      |      |      |      |      |      |
| GENE2253X | 19376_at   | 19376_at   | 1    | 1.53 | 1.71 | 1.84 | 0.77 | 1.86 | 1.79 |
|           | 0.74       | 1.31       | 1.62 |      |      |      |      |      |      |
| GENE92X   | 12233_at   | 12233_at   | 1    | 0.98 | 1.12 | 1.06 | 0.32 | 1.33 | 1.37 |
|           | 0.32       | 1.06       | 1.28 |      |      |      |      |      |      |
| GENE1392X | 16391_at   | 16391_at   | 1    | 1.32 | 1.92 | 2.51 | 0.45 | 2.11 | 2.42 |
|           | 0.43       | 2          | 2.72 |      |      |      |      |      |      |
| GENE969X  | 15137_s_at | 15137_s_at | 1    | 2.63 | 3.81 | 4.15 | 1.3  | 3.36 | 4.52 |
|           | 1.82       | 3.91       | 4.66 |      |      |      |      |      |      |

|           |            |            |   |      |      |      |       |      |      |
|-----------|------------|------------|---|------|------|------|-------|------|------|
| GENE1203X | 15866_s_at | 15866_s_at | 1 | 0.88 | 1.28 | 1.45 | 0.52  | 1.17 | 1.37 |
| 0.53      | 1.42       | 1.64       |   |      |      |      |       |      |      |
| GENE584X  | 13818_s_at | 13818_s_at | 1 | 1.92 | 2    | 2.2  | 1.22  | 3.7  | 2.49 |
| 2.04      | 4.02       | 2.2        |   |      |      |      |       |      |      |
| GENE2261X | 19397_at   | 19397_at   | 1 | 0.79 | 0.75 | 0.85 | 0.5   | 1.41 | 1.25 |
| 0.54      | 1.36       | 0.51       |   |      |      |      |       |      |      |
| GENE800X  | 14627_i_at | 14627_i_at | 1 | 0.66 | 0.62 | 0.68 | 0.15  | 1.31 | 1.1  |
| 0.2       | 1.51       | 0.78       |   |      |      |      |       |      |      |
| GENE2635X | 20587_at   | 20587_at   | 1 | 0.41 | 1    | 0.7  | 0.08  | 1.77 | 0.93 |
| 0.71      | 1.54       | 0.57       |   |      |      |      |       |      |      |
| GENE1753X | 17585_s_at | 17585_s_at | 1 | 0.81 | 1.69 | 1.37 | 0.11  | 2.18 | 1.23 |
| 0.92      | 2.38       | 0.68       |   |      |      |      |       |      |      |
| GENE1031X | 15355_at   | 15355_at   | 1 | 0.33 | 0.38 | 0.58 | -0.07 | 1.03 | 0.83 |
| 0.35      | 0.55       | 0.35       |   |      |      |      |       |      |      |
| GENE2123X | 18884_at   | 18884_at   | 1 | 1.32 | 1    | 1.19 | 0.09  | 2.07 | 1.45 |
| 0.69      | 1.23       | 0.91       |   |      |      |      |       |      |      |
| GENE1945X | 18267_at   | 18267_at   | 1 | 1.05 | 3.18 | 3.67 | 0.88  | 3.92 | 3.68 |
| 2.01      | 4.27       | 3.92       |   |      |      |      |       |      |      |
| GENE2013X | 18544_at   | 18544_at   | 1 | 0.88 | 2.32 | 2.6  | 0.65  | 3.2  | 2.64 |
| 1.48      | 3.39       | 2.68       |   |      |      |      |       |      |      |
| GENE607X  | 13920_at   | 13920_at   | 1 | 0.49 | 2.21 | 2.74 | 0.7   | 3.1  | 2.55 |
| 1.36      | 3.21       | 2.53       |   |      |      |      |       |      |      |
| GENE1161X | 15672_s_at | 15672_s_at | 1 | 1.34 | 2.72 | 2.98 | 0.36  | 3.27 | 3.22 |
| 1.1       | 3.48       | 3.4        |   |      |      |      |       |      |      |
| GENE2670X | 20689_at   | 20689_at   | 1 | 0.86 | 1.57 | 1.96 | 0.19  | 2.15 | 1.71 |
| 0.74      | 1.93       | 1.75       |   |      |      |      |       |      |      |
| GENE1661X | 17352_at   | 17352_at   | 1 | 0.57 | 1.45 | 1.53 | 0.5   | 2.31 | 1.58 |
| 0.88      | 2.08       | 1.28       |   |      |      |      |       |      |      |
| GENE785X  | 14591_at   | 14591_at   | 1 | 0.36 | 1.02 | 1.31 | 0.44  | 1.95 | 1.55 |
| 0.7       | 1.67       | 1.27       |   |      |      |      |       |      |      |
| GENE1134X | 15617_s_at | 15617_s_at | 1 | 0.62 | 0.94 | 1.2  | 0.19  | 1.73 | 1.26 |
| 0.5       | 1.54       | 1.18       |   |      |      |      |       |      |      |
| GENE556X  | 13656_at   | 13656_at   | 1 | 2    | 3.47 | 3.81 | 0.23  | 3.08 | 3.55 |
| 1.48      | 4.46       | 4.09       |   |      |      |      |       |      |      |
| GENE1811X | 17900_s_at | 17900_s_at | 1 | 0.77 | 1.29 | 1.67 | 0.01  | 1.23 | 1.22 |
| 0.63      | 1.91       | 1.5        |   |      |      |      |       |      |      |
| GENE306X  | 12965_at   | 12965_at   | 1 | 0.87 | 1.68 | 1.8  | 0     | 1.76 | 2.15 |
| 0.96      | 2.14       | 1.74       |   |      |      |      |       |      |      |
| GENE2040X | 18605_s_at | 18605_s_at | 1 | 0.36 | 0.72 | 0.88 | -0.05 | 0.8  | 1.04 |
| 0.3       | 1          | 1.06       |   |      |      |      |       |      |      |
| GENE1553X | 16939_at   | 16939_at   | 1 | 1.55 | 2.57 | 3.06 | -0.1  | 3.19 | 1.98 |
| 0.85      | 3.71       | 2.61       |   |      |      |      |       |      |      |
| GENE1554X | 16940_g_at | 16940_g_at | 1 | 0.51 | 0.94 | 1.21 | -0.05 | 1.55 | 0.98 |
| 0.3       | 1.51       | 1.15       |   |      |      |      |       |      |      |
| GENE1027X | 15341_at   | 15341_at   | 1 | 0.82 | 2.86 | 3.39 | 0.32  | 2.77 | 2.53 |
| 0.45      | 2.95       | 2.19       |   |      |      |      |       |      |      |
| GENE366X  | 13135_at   | 13135_at   | 1 | 0.39 | 0.79 | 1.24 | 0.18  | 1.61 | 1    |
| 1.03      | 0.61       |            |   |      |      |      |       |      | 0    |
| GENE1101X | 15541_at   | 15541_at   | 1 | 0.53 | 0.49 | 0.96 | -0.02 | 1.13 | 0.64 |
| 0.03      | 0.7        | 0.58       |   |      |      |      |       |      |      |
| GENE2622X | 20551_at   | 20551_at   | 1 | 0.78 | 0.92 | 1.41 | 0.28  | 1.48 | 1.34 |
| 0.27      | 0.87       | 0.98       |   |      |      |      |       |      |      |
| GENE2273X | 19433_at   | 19433_at   | 1 | 0.84 | 1.07 | 1.16 | 0.31  | 1.33 | 1.05 |
| 0.28      | 0.72       | 0.74       |   |      |      |      |       |      |      |
| GENE1597X | 17051_s_at | 17051_s_at | 1 | 1.32 | 1.54 | 2.37 | 0.16  | 1.75 | 1.71 |
| 0.34      | 1.34       | 0.78       |   |      |      |      |       |      |      |

|           |            |            |      |       |       |       |      |      |      |
|-----------|------------|------------|------|-------|-------|-------|------|------|------|
| GENE2089X | 18719_r_at | 18719_r_at | 1    | 0.51  | 0.81  | 1.08  | 0.11 | 1.14 | 0.91 |
|           | 0.28       | 0.93       | 0.5  |       |       |       |      |      |      |
| GENE154X  | 12438_at   | 12438_at   | 1    | 3.17  | 3.35  | 3.53  | 1.87 | 3.68 | 2.27 |
|           | 1.67       | 4.05       | 3.13 |       |       |       |      |      |      |
| GENE978X  | 15151_f_at | 15151_f_at | 1    | 1.11  | 0.95  | 1     | 0.9  | 1.5  | 1.07 |
|           | 0.69       | 1.49       | 1.31 |       |       |       |      |      |      |
| GENE2582X | 20433_at   | 20433_at   | 1    | 1.75  | 2.18  | 2.86  | 1.26 | 2.87 | 3.21 |
|           | 1.47       | 2.7        | 2.24 |       |       |       |      |      |      |
| GENE2637X | 20599_at   | 20599_at   | 1    | 1.07  | 1.58  | 1.68  | 0.63 | 1.86 | 1.88 |
|           | 0.73       | 1.56       | 1.02 |       |       |       |      |      |      |
| GENE1805X | 17885_at   | 17885_at   | 1    | 1.49  | 2.09  | 2.47  | 1.28 | 3.32 | 2.83 |
|           | 0.93       | 2.64       | 1.89 |       |       |       |      |      |      |
| GENE1792X | 17852_g_at | 17852_g_at | 1    | 0.76  | 0.89  | 1.06  | 0.62 | 1.13 | 1.3  |
|           | 0.23       | 1.07       | 0.68 |       |       |       |      |      |      |
| GENE138X  | 12360_at   | 12360_at   | 1    | 1.37  | 2.57  | 2.35  | 1.16 | 2.78 | 1.8  |
|           | 1.78       | 2.3        | 1.7  |       |       |       |      |      |      |
| GENE2524X | 20262_at   | 20262_at   | 1    | 1.09  | 2.32  | 2.2   | 1.17 | 2.61 | 1.84 |
|           | 1.8        | 2.43       | 1.67 |       |       |       |      |      |      |
| GENE1181X | 15778_at   | 15778_at   | 1    | 1.5   | 3.85  | 3.71  | 1.8  | 4.12 | 2.23 |
|           | 2.87       | 3.89       | 1.92 |       |       |       |      |      |      |
| GENE1575X | 16992_at   | 16992_at   | 1    | 0.71  | 1.04  | 0.81  | 0.45 | 1.16 | 0.55 |
|           | 0.65       | 0.97       | 0.56 |       |       |       |      |      |      |
| GENE2322X | 19644_at   | 19644_at   | 1    | 0.57  | 0.97  | 1.35  | 0.92 | 1.59 | 1.08 |
|           | 0.5        | 1.34       | 0.87 |       |       |       |      |      |      |
| GENE336X  | 13070_at   | 13070_at   | 1    | 0.94  | 0.96  | 1.22  | 0.63 | 1.6  | 0.92 |
|           | 0.62       | 1.27       | 0.72 |       |       |       |      |      |      |
| GENE1517X | 16721_at   | 16721_at   | 1    | 0.87  | 1.97  | 2.58  | 0.9  | 3.27 | 1.68 |
|           | 0.7        | 2.27       | 1.1  |       |       |       |      |      |      |
| GENE215X  | 12645_at   | 12645_at   | 1    | -0.29 | -0.51 | -0.24 | 0.7  | 0.69 | 1.73 |
|           | 0.82       | 0.94       | 1.75 |       |       |       |      |      |      |
| GENE982X  | 15161_s_at | 15161_s_at | 1    | 0.28  | -0.58 | -0.84 | 1.1  | 0.36 | 2.74 |
|           | 1.95       | 2.08       | 3.03 |       |       |       |      |      |      |
| GENE178X  | 12521_at   | 12521_at   | 1    | 0     | -1.07 | -0.07 | 1.35 | 0.22 | 2.61 |
|           | 1.78       | 1.32       | 2.91 |       |       |       |      |      |      |
| GENE906X  | 15018_at   | 15018_at   | 1    | -0.79 | -1.24 | -0.96 | 1.1  | 0.36 | 2.3  |
|           | 1.47       | 0.93       | 1.67 |       |       |       |      |      |      |
| GENE2446X | 20042_at   | 20042_at   | 1    | -0.08 | -0.43 | -0.66 | 0.51 | 0.37 | 1.39 |
|           | 1.19       | 0.63       | 1.11 |       |       |       |      |      |      |
| GENE580X  | 13803_at   | 13803_at   | 1    | -1.67 | -1.67 | -1.67 | 2.32 | 2.37 | 3.84 |
|           | 3.34       | 3.42       | 3.74 |       |       |       |      |      |      |
| GENE2412X | 19960_at   | 19960_at   | 1    | -0.16 | -0.34 | -0.5  | 1.17 | 0.13 | 1.3  |
|           | 1.6        | 0.77       | 0.98 |       |       |       |      |      |      |
| GENE180X  | 12525_at   | 12525_at   | 1    | -0.48 | 0.08  | -0.32 | 0.92 | 0    | 1.23 |
|           | 1.07       | 0.41       | 0.58 |       |       |       |      |      |      |
| GENE1442X | 16510_at   | 16510_at   | 1    | -1.67 | -1.67 | 0.85  | 1.76 | 2    | 2.8  |
|           | 2.61       | 2.82       | 1.48 |       |       |       |      |      |      |
| GENE2463X | 20093_i_at | 20093_i_at | 1    | 0.07  | -0.15 | 0.29  | 0.36 | 0.08 | 1.04 |
|           | 1.11       | 0.82       | 0.23 |       |       |       |      |      |      |
| GENE1712X | 17484_at   | 17484_at   | 1    | 0     | 0     | 0     | 0    | 2    | 3.48 |
|           | 2.37       | 4.52       | 5.24 |       |       |       |      |      |      |
| GENE2653X | 20641_at   | 20641_at   | 1    | 0     | 0     | 0     | 1.13 | 1    | 2.96 |
|           | 2.07       | 3.86       | 4.32 |       |       |       |      |      |      |
| GENE158X  | 12449_s_at | 12449_s_at | 1    | -0.12 | -0.12 | -0.41 | 0.21 | 0.65 | 3.39 |
|           | 1.9        | 3.45       | 4.29 |       |       |       |      |      |      |
| GENE229X  | 12736_f_at | 12736_f_at | 1    | -0.32 | 0.26  | -0.51 | 0.24 | 1.08 | 1.67 |
|           | 1.42       | 2.03       | 2.14 |       |       |       |      |      |      |

|           |            |            |   |          |       |       |      |      |      |
|-----------|------------|------------|---|----------|-------|-------|------|------|------|
| GENE1096X | 15531_i_at | 15531_i_at | 1 | 0        | 0     | 1.48  | 1.13 | 1.92 | 4.96 |
| 4.3       | 4.23       | 4.94       |   |          |       |       |      |      |      |
| GENE2570X | 20393_at   | 20393_at   | 1 | 0.41     | 0.22  | 0.36  | 0.15 | 0.7  | 1.81 |
| 1.2       | 1.58       | 1.6        |   |          |       |       |      |      |      |
| GENE620X  | 13965_s_at | 13965_s_at | 1 | 0.66     | 0     | -0.18 | 0.91 | 1.35 | 2.55 |
| 2.76      | 2.37       | 3          |   |          |       |       |      |      |      |
| GENE1901X | 18109_s_at | 18109_s_at | 1 | 0.17     | 0.14  | 0.17  | 1.02 | 1.2  | 2.72 |
| 1.79      | 2.63       | 3.23       |   |          |       |       |      |      |      |
| GENE2464X | 20096_at   | 20096_at   | 1 | 0.22     | 0.18  | 0.41  | 1.25 | 0.87 | 3.1  |
| 2.25      | 2.95       | 3.22       |   |          |       |       |      |      |      |
| GENE1265X | 16038_s_at | 16038_s_at | 1 | -0.69    | -0.1  | 0.44  | 0.05 | 0.86 | 1.27 |
| 1.62      | 1.4        | 1.61       |   |          |       |       |      |      |      |
| GENE604X  | 13916_at   | 13916_at   | 1 | -0.07    | -0.44 | -0.27 | 1.76 | 2.07 | 3.8  |
| 2.44      | 2.77       | 4.03       |   |          |       |       |      |      |      |
| GENE920X  | 15052_at   | 15052_at   | 1 | 0.15     | -0.14 | 0.16  | 1.32 | 0.95 | 2.54 |
| 2.06      | 1.97       | 2.41       |   |          |       |       |      |      |      |
| GENE262X  | 12797_s_at | 12797_s_at | 1 | -0.01    | 0.07  | 0.2   | 0.95 | 0.84 | 1.75 |
| 1.28      | 1.55       | 1.58       |   |          |       |       |      |      |      |
| GENE650X  | 14052_at   | 14052_at   | 1 | 0.8      | -0.62 | 0.48  | 1.85 | 2.2  | 2.67 |
| 2.19      | 2.8        | 3.49       |   |          |       |       |      |      |      |
| GENE2353X | 19762_at   | 19762_at   | 1 | 0.81     | -0.07 | -0.3  | 3.63 | 4.08 | 5.72 |
| 4.13      | 5          | 6.22       |   |          |       |       |      |      |      |
| GENE1305X | 16115_at   | 16115_at   | 1 | 0.31     | 0.14  | 0.25  | 2.88 | 3.37 | 4.49 |
| 3.62      | 3.68       | 3.78       |   |          |       |       |      |      |      |
| GENE1158X | 15669_s_at | 15669_s_at | 1 | 0.42     | 0.26  | 0.21  | 2.8  | 3.12 | 4.27 |
| 3.05      | 3.17       | 3.61       |   |          |       |       |      |      |      |
| GENE2323X | 19646_at   | 19646_at   | 1 | -0.23    | -0.42 | -0.32 | 3    | 3.42 | 3.8  |
| 3.73      | 3.55       | 4.01       |   |          |       |       |      |      |      |
| GENE517X  | 13588_at   | 13588_at   | 1 | -0.28    | -0.11 | 0.26  | 1.75 | 2.83 | 3.42 |
| 2.03      | 2.74       | 3.12       |   |          |       |       |      |      |      |
| GENE1296X | 16087_s_at | 16087_s_at | 1 | -0.00916 | 0.1   | 0.07  | 1.51 | 2.05 |      |
| 2.86      | 1.63       | 2.2        |   |          | 2.13  |       |      |      |      |
| GENE605X  | 13918_at   | 13918_at   | 1 | -0.2     | -0.16 | -0.07 | 0.93 | 1.29 | 1.89 |
| 1.04      | 1.1        | 1.52       |   |          |       |       |      |      |      |
| GENE221X  | 12698_at   | 12698_at   | 1 | -0.42    | -0.66 | -0.24 | 1.43 | 2.73 | 1.82 |
| 2.65      | 3.43       | 2.82       |   |          |       |       |      |      |      |
| GENE1933X | 18243_at   | 18243_at   | 1 | -0.28    | -0.5  | -0.23 | 0.47 | 0.74 | 0.51 |
| 0.89      | 1.05       | 1.05       |   |          |       |       |      |      |      |
| GENE474X  | 13467_at   | 13467_at   | 1 | -0.5     | -1.2  | -1.29 | 2.12 | 2.67 | 3.58 |
| 4.26      | 4.65       | 4.13       |   |          |       |       |      |      |      |
| GENE1321X | 16144_s_at | 16144_s_at | 1 | -0.31    | -0.67 | -0.45 | 0.45 | 0.94 | 1.23 |
| 1.86      | 1.97       | 1.91       |   |          |       |       |      |      |      |
| GENE1757X | 17595_s_at | 17595_s_at | 1 | -0.21    | -0.16 | -0.24 | 1.93 | 1.24 | 1.6  |
| 2.77      | 2.81       | 3.29       |   |          |       |       |      |      |      |
| GENE1138X | 15625_at   | 15625_at   | 1 | -0.09    | 0.13  | 0.07  | 1.3  | 1.3  | 1.19 |
| 1.91      | 1.93       | 1.9        |   |          |       |       |      |      |      |
| GENE1298X | 16092_s_at | 16092_s_at | 1 | 0.13     | -0.26 | -0.26 | 1.19 | 1.58 | 1    |
| 1.65      | 1.69       | 1.75       |   |          |       |       |      |      |      |
| GENE1952X | 18278_at   | 18278_at   | 1 | 0.13     | -0.01 | -0.52 | 0.82 | 0.91 | 0.8  |
| 1.09      | 1.2        | 1.17       |   |          |       |       |      |      |      |
| GENE1477X | 16594_at   | 16594_at   | 1 | 0.1      | -0.21 | -0.3  | 0.69 | 1.14 | 0.5  |
| 1.76      | 1.93       | 1.42       |   |          |       |       |      |      |      |
| GENE980X  | 15154_at   | 15154_at   | 1 | -0.94    | 0.01  | -0.65 | 2.2  | 1.37 | 1.58 |
| 2.64      | 3.65       | 2.08       |   |          |       |       |      |      |      |
| GENE500X  | 13555_at   | 13555_at   | 1 | -0.23    | -0.59 | -0.56 | 2.01 | 1.43 | 1.78 |
| 2.25      | 1.69       | 1.8        |   |          |       |       |      |      |      |

|           |            |            |      |       |       |          |      |       |      |
|-----------|------------|------------|------|-------|-------|----------|------|-------|------|
| GENE1819X | 17922_at   | 17922_at   | 1    | 0.09  | -0.02 | -0.27    | 1.13 | 0.72  | 1.11 |
|           | 1.55       | 1.24       | 1.1  |       |       |          |      |       |      |
| GENE416X  | 13244_s_at | 13244_s_at | 1    | 1.33  | 1.86  | 1.99     | 2.04 | 2.25  | 3.62 |
|           | 3.28       | 3.71       | 4.55 |       |       |          |      |       |      |
| GENE2067X | 18668_at   | 18668_at   | 1    | 1.56  | 1.75  | 2.29     | 2.63 | 1.73  | 3.68 |
|           | 3.59       | 3.5        | 4.17 |       |       |          |      |       |      |
| GENE2504X | 20214_i_at | 20214_i_at | 1    | 0.52  | 0.84  | 0.66     | 0.74 | 0.67  | 1.13 |
|           | 1.65       | 1.54       | 1.78 |       |       |          |      |       |      |
| GENE1838X | 17963_at   | 17963_at   | 1    | 1.28  | 1.21  | 1.02     | 1.35 | 1.1   | 0.98 |
|           | 2.41       | 2.43       | 2.89 |       |       |          |      |       |      |
| GENE1240X | 15982_s_at | 15982_s_at | 1    | 0.41  | 0.22  | 0.3      | 0.99 | 0.59  | 0.62 |
|           | 0.96       | 0.81       | 1.52 |       |       |          |      |       |      |
| GENE2334X | 19673_g_at | 19673_g_at | 1    | 1.97  | 2.22  | 3.21     | 5.29 | 5.32  | 6.5  |
|           | 7.31       | 7.15       | 7.52 |       |       |          |      |       |      |
| GENE2333X | 19672_at   | 19672_at   | 1    | 1.19  | 1.55  | 2.18     | 2.74 | 3.1   | 3.97 |
|           | 4.13       | 4.24       | 4.36 |       |       |          |      |       |      |
| GENE1953X | 18280_at   | 18280_at   | 1    | 0.85  | 0.6   | 0.88     | 1.15 | 1.33  | 1.77 |
|           | 1.95       | 1.68       | 1.71 |       |       |          |      |       |      |
| GENE2239X | 19284_at   | 19284_at   | 1    | 0.89  | 0.92  | 0.71     | 3.17 | 2.69  | 4.26 |
|           | 4.2        | 4.46       | 4.17 |       |       |          |      |       |      |
| GENE162X  | 12454_at   | 12454_at   | 1    | 0.34  | 0.56  | 0.52     | 1.1  | 1.17  | 1.89 |
|           | 2.04       | 1.34       | 1.7  |       |       |          |      |       |      |
| GENE2240X | 19288_at   | 19288_at   | 1    | 1.25  | 1     | 1.68     | 3.33 | 3.17  | 2.46 |
|           | 4.96       | 5.22       | 3.83 |       |       |          |      |       |      |
| GENE1726X | 17522_at   | 17522_at   | 1    | 0.57  | 0.11  | 0.76     | 0.97 | 0.82  | 1.04 |
|           | 1.45       | 1.35       | 1    |       |       |          |      |       |      |
| GENE1666X | 17373_at   | 17373_at   | 1    | 0.52  | 0.27  | 0.25     | 0.72 | 0.47  | 1.11 |
|           | 1.24       | 1.41       | 1.04 |       |       |          |      |       |      |
| GENE1097X | 15532_r_at | 15532_r_at | 1    | 0.8   | -0.67 | 1.75     | 0.69 | 0.13  | 2.4  |
|           | 3.1        | 3.15       | 3.83 |       |       |          |      |       |      |
| GENE2371X | 19854_at   | 19854_at   | 1    | 0.64  | 0.52  | 0.94     | 0.6  | -0.17 | 1.83 |
|           | 1.54       | 2.03       | 2.97 |       |       |          |      |       |      |
| GENE186X  | 12538_at   | 12538_at   | 1    | 0.3   | 0.16  | 0.71     | 0.86 | -0.53 | 1.23 |
|           | 1.81       | 1.74       | 1.7  |       |       |          |      |       |      |
| GENE102X  | 12251_at   | 12251_at   | 1    | -0.31 | -0.23 | 0.66     | 0.61 | 0.02  | 1.25 |
|           | 0.83       | 1.54       | 1.64 |       |       |          |      |       |      |
| GENE365X  | 13134_s_at | 13134_s_at | 1    | -0.16 | -0.21 | 0.05     | 1.57 | 0.54  | 0.8  |
|           | 3.41       | 2.3        | 1.67 |       |       |          |      |       |      |
| GENE1235X | 15971_s_at | 15971_s_at | 1    | 0.06  | 0.07  | 0.62     | 1.4  | -0.39 | 1.14 |
|           | 3.18       | 2.25       | 1.65 |       |       |          |      |       |      |
| GENE413X  | 13236_at   | 13236_at   | 1    | -0.03 | 0.27  | 0.68     | 0.72 | 0.03  | 0.46 |
|           | 1.41       | 1.03       | 1.41 |       |       |          |      |       |      |
| GENE2286X | 19463_s_at | 19463_s_at | 1    | 0.14  | 0.3   | 0.54     | 1.27 | 0.2   | 0.66 |
|           | 1.79       | 1.04       | 1.41 |       |       |          |      |       |      |
| GENE1294X | 16082_s_at | 16082_s_at | 1    | 0.09  | 0.37  | 0.83     | 0.43 | 0.28  | 0.91 |
|           | 1.63       | 1.2        | 1.4  |       |       |          |      |       |      |
| GENE705X  | 14398_at   | 14398_at   | 1    | 0.23  | 0.17  | 0.41     | 0.42 | 0.26  | 0.77 |
|           | 1.07       | 0.77       | 1    |       |       |          |      |       |      |
| GENE949X  | 15103_s_at | 15103_s_at | 1    | 0.37  | 0.4   | 0.36     | 0.8  | 0.02  | 1.06 |
|           | 1.4        | 0.51       | 1.73 |       |       |          |      |       |      |
| GENE1131X | 15611_s_at | 15611_s_at | 1    | 0.16  | 0.21  | -0.00153 |      | 0.72  | 0.11 |
|           | 0.87       | 1.5        | 0.66 |       |       |          |      |       |      |
| GENE152X  | 12428_at   | 12428_at   | 1    | 0.51  | 0.2   | -0.01    | 0.16 | 0.13  | 0.96 |
|           | 1.14       | 0.42       | 1.09 |       |       |          |      |       |      |
| GENE1084X | 15496_at   | 15496_at   | 1    | 0.05  | 0.32  | -0.2     | 0.43 | 0.5   | 1.66 |
|           | 2.39       | 1.2        | 2.03 |       |       |          |      |       |      |

|           |            |            |      |       |       |       |         |       |      |
|-----------|------------|------------|------|-------|-------|-------|---------|-------|------|
| GENE1219X | 15910_at   | 15910_at   | 1    | 0.02  | -0.12 | -0.17 | 0.17    | -0.03 | 0.64 |
| 1.15      | 0.54       | 1          |      |       |       |       |         |       |      |
| GENE197X  | 12574_at   | 12574_at   | 1    | 0     | 0     | 0     | 0       | 0     | 1.84 |
| 1.26      | 2.72       | 4.6        |      |       |       |       |         |       |      |
| GENE1534X | 16859_at   | 16859_at   | 1    | 0     | 0     | 0     | 0       | 0.26  | 1.26 |
| 1.26      | 1.76       | 3.48       |      |       |       |       |         |       |      |
| GENE831X  | 14719_s_at | 14719_s_at | 1    | -0.15 | -0.12 | -0.05 | -0.11   | 0.06  | 0.36 |
| 0.43      | 0.97       | 1.29       |      |       |       |       |         |       |      |
| GENE1331X | 16173_s_at | 16173_s_at | 1    | 0.16  | 0.32  | -0.41 | 1       | -0.16 | 2.47 |
| 4.02      | 3.78       | 4.37       |      |       |       |       |         |       |      |
| GENE2593X | 20459_i_at | 20459_i_at | 1    | 0.33  | 0.18  | -0.12 | 0.06    | 0.02  | 0.37 |
| 1.01      | 1          | 1.28       |      |       |       |       |         |       |      |
| GENE2617X | 20536_s_at | 20536_s_at | 1    | 0.24  | -0.1  | -0.34 | 0.05    | -0.1  | 0.62 |
| 0.66      | 0.74       | 1.24       |      |       |       |       |         |       |      |
| GENE765X  | 14536_s_at | 14536_s_at | 1    | 0.24  | -0.06 | -0.1  | -0.13   | -0.15 | 0.43 |
| 0.56      | 0.63       | 1.04       |      |       |       |       |         |       |      |
| GENE266X  | 12802_at   | 12802_at   | 1    | 0.03  | -0.09 | -0.32 | 0.28    | 1     | 1.38 |
| 3.47      | 4.3        | 4.22       |      |       |       |       |         |       |      |
| GENE1085X | 15497_at   | 15497_at   | 1    | -0.19 | -0.32 | -0.31 | 0.24    | 1.04  | 1.22 |
| 1.56      | 2.35       | 2.13       |      |       |       |       |         |       |      |
| GENE832X  | 14721_s_at | 14721_s_at | 1    | -0.08 | 0.07  | -0.17 | 0.08    | 0.46  | 0.39 |
| 0.67      | 0.93       | 1.08       |      |       |       |       |         |       |      |
| GENE529X  | 13612_at   | 13612_at   | 1    | -0.31 | -0.25 | -0.18 | 0.26    | 0.46  | 0.16 |
| 1.13      | 1.48       | 1.34       |      |       |       |       |         |       |      |
| GENE1721X | 17510_at   | 17510_at   | 1    | -0.24 | -0.28 | -0.35 | 0.22    | 0.49  | 0.34 |
| 1.21      | 1.22       | 1.13       |      |       |       |       |         |       |      |
| GENE1026X | 15337_at   | 15337_at   | 1    | 0.24  | 0.76  | 0.69  | -0.43   | 0.78  | 0.24 |
| 0.62      | 1.5        | 0.72       |      |       |       |       |         |       |      |
| GENE870X  | 14900_at   | 14900_at   | 1    | -0.12 | 0.76  | 1.02  | -0.4    | 1.55  | 0.4  |
| 0.54      | 1.53       | 0.92       |      |       |       |       |         |       |      |
| GENE436X  | 13284_at   | 13284_at   | 1    | 0.08  | 1.14  | 1.07  | -0.85   | 2.28  | 1.3  |
| 1.19      | 3          | 2.18       |      |       |       |       |         |       |      |
| GENE1206X | 15874_at   | 15874_at   | 1    | 0.16  | 0.45  | 0.45  | -1.11   | 1.88  | 0.69 |
| 0.8       | 2.36       | 1.32       |      |       |       |       |         |       |      |
| GENE2046X | 18622_g_at | 18622_g_at | 1    | 0.22  | 0.28  | 0.31  | -0.27   | 0.82  | 0.51 |
| 0.05      | 0.85       | 1.23       |      |       |       |       |         |       |      |
| GENE255X  | 12789_at   | 12789_at   | 1    | 0     | 0.23  | 0.2   | 0.00934 |       | 0.75 |
| 0.43      | 0.46       | 0.94       | 1.02 |       |       |       |         |       |      |
| GENE1474X | 16591_s_at | 16591_s_at | 1    | 0.06  | 0.14  | 0.26  | -0.17   | 0.63  | 0.4  |
| 0.33      | 1.31       | 1.04       |      |       |       |       |         |       |      |
| GENE362X  | 13126_g_at | 13126_g_at | 1    | 0.05  | 0.17  | 0.23  | -0.11   | 0.69  | 0.54 |
| 0.38      | 1.3        | 0.98       |      |       |       |       |         |       |      |
| GENE565X  | 13681_s_at | 13681_s_at | 1    | 0.3   | 0.76  | 1.04  | 0.35    | 2     | 0.88 |
| 0.78      | 1.73       | 0.49       |      |       |       |       |         |       |      |
| GENE966X  | 15132_s_at | 15132_s_at | 1    | 0     | 0.8   | 0.61  | 0.14    | 2.24  | 1.1  |
| 1.11      | 2.42       | 0.55       |      |       |       |       |         |       |      |
| GENE1927X | 18226_s_at | 18226_s_at | 1    | 0.44  | 0.28  | 0.32  | -0.12   | 1.29  | 0.82 |
| 0.35      | 1.09       | 0.49       |      |       |       |       |         |       |      |
| GENE1090X | 15517_at   | 15517_at   | 1    | 0.04  | 0.33  | 0.37  | -0.07   | 1.41  | 0.72 |
| 0.39      | 0.99       | 0.52       |      |       |       |       |         |       |      |
| GENE1004X | 15200_s_at | 15200_s_at | 1    | 0.15  | 0.21  | 0.33  | 0.01    | 1.05  | 0.39 |
| 0.26      | 0.75       | 0.35       |      |       |       |       |         |       |      |
| GENE1315X | 16133_at   | 16133_at   | 1    | 0.25  | 0.46  | 0.62  | -0.09   | 1.31  | 0.64 |
| 0.24      | 0.98       | 0.44       |      |       |       |       |         |       |      |
| GENE431X  | 13274_at   | 13274_at   | 1    | 0.24  | 1     | 0.89  | -1      | 2.74  | 0.93 |
| 0.84      | 2.67       | 0.48       |      |       |       |       |         |       |      |



|           |            |            |      |         |       |       |         |      |         |   |
|-----------|------------|------------|------|---------|-------|-------|---------|------|---------|---|
| GENE432X  | 13275_f_at | 13275_f_at | 1    | 1.58    | 0     | 0     | 0       | 3.78 | 1.67    |   |
|           | 1.26       | 3.82       | 1.13 |         |       |       |         |      |         |   |
| GENE606X  | 13919_at   | 13919_at   | 1    | 0       | 0     | 0     | 1       | 5.05 | 1.84    |   |
|           | 2.88       | 5.37       | 2.32 |         |       |       |         |      |         |   |
| GENE633X  | 14017_at   | 14017_at   | 1    | 0       | 0     | 0     | 0       | 4.07 | 1.92    |   |
|           | 2.8        | 3.76       | 2.2  |         |       |       |         |      |         |   |
| GENE1623X | 17134_at   | 17134_at   | 1    | 0       | 0     | 0.48  | 0       | 5.39 | 2.84    | 2 |
|           | 5.71       | 1.67       |      |         |       |       |         |      |         |   |
| GENE2299X | 19546_at   | 19546_at   | 1    | 0       | 0     | 0     | 1.13    | 4.54 | 3.07    |   |
|           | 2.24       | 5.31       | 3.47 |         |       |       |         |      |         |   |
| GENE453X  | 13351_at   | 13351_at   | 1    | 0       | 0     | 0.48  | 0.48    | 2.48 | 2.43    |   |
|           | 1.67       | 3.48       | 3.1  |         |       |       |         |      |         |   |
| GENE1028X | 15342_at   | 15342_at   | 1    | 0       | -0.15 | -0.15 | 0.26    | 1.51 | 1.45    |   |
|           | 0.96       | 1.91       | 1.67 |         |       |       |         |      |         |   |
| GENE850X  | 14780_at   | 14780_at   | 1    | 0       | 0     | 0     | -0.48   | 3.25 | 2.14    |   |
|           | 1.13       | 3.88       | 2.63 |         |       |       |         |      |         |   |
| GENE1162X | 15673_at   | 15673_at   | 1    | -0.12   | -0.03 | -0.05 | -0.04   | 1.2  | 0.63    |   |
|           | 0.51       | 1.41       | 1.09 |         |       |       |         |      |         |   |
| GENE525X  | 13605_at   | 13605_at   | 1    | 0.00952 |       | -0.01 | 0.00636 |      | 0.00342 |   |
|           | 1.01       | 0.71       | 0.56 | 1.54    | 1.34  |       |         |      |         |   |
| GENE347X  | 13104_s_at | 13104_s_at | 1    | -0.12   | -0.2  | -0.2  | 0.41    | 1.1  | 0.63    |   |
|           | 0.8        | 1.52       | 1.28 |         |       |       |         |      |         |   |
| GENE909X  | 15025_at   | 15025_at   | 1    | -0.26   | -0.56 | -0.29 | 0.16    | 1.27 | 0.8     |   |
|           | 0.95       | 1.85       | 1.52 |         |       |       |         |      |         |   |
| GENE210X  | 12623_at   | 12623_at   | 1    | -0.36   | -0.36 | 0     | 0.29    | 1.5  | 0.78    |   |
|           | 0.83       | 1.87       | 0.93 |         |       |       |         |      |         |   |
| GENE1157X | 15667_s_at | 15667_s_at | 1    | -0.27   | -0.26 | -0.17 | 0.07    | 0.81 | 0.29    |   |
|           | 0.31       | 1.12       | 0.76 |         |       |       |         |      |         |   |
| GENE478X  | 13493_at   | 13493_at   | 1    | -0.4    | -0.59 | -0.82 | 0.15    | 1.33 | 0.6     |   |
|           | 1.03       | 2.06       | 1.19 |         |       |       |         |      |         |   |
| GENE2489X | 20179_at   | 20179_at   | 1    | 0       | -0.51 | -0.56 | 0.33    | 0.85 | 0.83    |   |
|           | 0.91       | 1.29       | 0.84 |         |       |       |         |      |         |   |
| GENE294X  | 12921_s_at | 12921_s_at | 1    | -0.29   | -0.16 | -0.38 | 0.05    | 0.72 | 0.71    |   |
|           | 0.52       | 1.1        | 0.44 |         |       |       |         |      |         |   |
| GENE1647X | 17291_at   | 17291_at   | 1    | -0.36   | 0.15  | -0.36 | -0.84   | 1.83 | 0.53    |   |
|           | 0.76       | 2.56       | 1.32 |         |       |       |         |      |         |   |
| GENE2348X | 19741_at   | 19741_at   | 1    | -0.24   | 0.29  | -0.53 | -0.73   | 0.93 | 0.43    |   |
|           | 0.8        | 1.61       | 1.23 |         |       |       |         |      |         |   |
| GENE1380X | 16354_at   | 16354_at   | 1    | 0       | 0.36  | -0.48 | 0.13    | 2.03 | 0.48    |   |
|           | 2.32       | 3.56       | 2.37 |         |       |       |         |      |         |   |
| GENE985X  | 15166_s_at | 15166_s_at | 1    | -0.04   | 0.24  | 0.11  | 0.18    | 1.04 | 0.11    |   |
|           | 0.73       | 1.1        | 0.94 |         |       |       |         |      |         |   |
| GENE1125X | 15600_s_at | 15600_s_at | 1    | 0.52    | 0.65  | 0.46  | 1.08    | 1.52 | 0.19    |   |
|           | 2.27       | 2.73       | 1.24 |         |       |       |         |      |         |   |
| GENE503X  | 13560_at   | 13560_at   | 1    | -0.01   | 0.26  | 0.1   | 0.57    | 0.6  | 0.24    |   |
|           | 0.74       | 1.21       | 0.54 |         |       |       |         |      |         |   |
| GENE1995X | 18437_at   | 18437_at   | 1    | 0.58    | 0.95  | 0.35  | 0.68    | 1.61 | -0.36   |   |
|           | 2.5        | 2.05       | 0.73 |         |       |       |         |      |         |   |
| GENE868X  | 14896_at   | 14896_at   | 1    | 0.11    | 0.21  | -0.12 | -0.1    | 0.87 | 0.35    |   |
|           | 1.1        | 1.89       | 0.51 |         |       |       |         |      |         |   |
| GENE1754X | 17588_s_at | 17588_s_at | 1    | 0       | 0.26  | 0.48  | 0       | 0.84 | 0       | 1 |
|           | 3.22       | 0.58       |      |         |       |       |         |      |         |   |
| GENE471X  | 13449_at   | 13449_at   | 1    | 0       | 0     | 0     | 0       | 1.26 | 0       |   |
|           | 1.76       | 3.7        | 0    |         |       |       |         |      |         |   |
| GENE1431X | 16493_at   | 16493_at   | 1    | 1.58    | 1.63  | 1.8   | 3.45    | 0    | 3.1     |   |
|           | 3.72       | 1.54       | 1.87 |         |       |       |         |      |         |   |

|           |            |            |          |          |           |          |       |       |         |
|-----------|------------|------------|----------|----------|-----------|----------|-------|-------|---------|
| GENE977X  | 15147_s_at | 15147_s_at | 1        | 0.34     | 0.18      | 0.2      | 1.36  | 0.49  | 1.45    |
|           | 1.83       | 0.7        | 1.04     |          |           |          |       |       |         |
| GENE2154X | 18955_at   | 18955_at   | 1        | 0.47     | 0.43      | 0.07     | 1.58  | 0.67  | 1.23    |
|           | 1.53       | 0.51       | 0.65     |          |           |          |       |       |         |
| GENE2365X | 19843_at   | 19843_at   | 1        | -0.00882 |           | 0.29     | 1.52  | 1.14  | 0.32    |
|           | 1.28       | 1.32       | 0.9      | 0.75     |           |          |       |       |         |
| GENE1622X | 17119_s_at | 17119_s_at | 1        | 0.2      | 0.38      | 1.8      | 1.21  | 0.93  | 1.08    |
|           | 1.29       | 1.33       | 0.74     |          |           |          |       |       |         |
| GENE402X  | 13212_s_at | 13212_s_at | 1        | 1.95     | -0.56     | 1.99     | 3.16  | 0.66  | 1.13    |
|           | 2.57       | 1.02       | 0.6      |          |           |          |       |       |         |
| GENE399X  | 13198_i_at | 13198_i_at | 1        | 0.96     | 0.61      | 1.42     | 0.2   | 0.46  | 0.38    |
|           | 1.68       | 0.58       | 0        |          |           |          |       |       |         |
| GENE591X  | 13855_at   | 13855_at   | 1        | 1.45     | 1.47      | 1.13     | 0.77  | 0.78  | 0.75    |
|           | 1.06       | 0.73       | 0        |          |           |          |       |       |         |
| GENE824X  | 14691_at   | 14691_at   | 1        | 1.23     | 1.01      | 0.6      | 0.75  | 0.74  | 0.45    |
|           | 1.14       | 0.73       | -0.74    |          |           |          |       |       |         |
| GENE1339X | 16217_s_at | 16217_s_at | 1        | 0.43     | 0.95      | 0.17     | 0.32  | -1    | 1       |
|           | 1.51       | 0.86       | 0.86     |          |           |          |       |       |         |
| GENE735X  | 14479_at   | 14479_at   | 1        | 1.04     | 0.99      | 0.72     | 0.51  | -0.29 | 0.74    |
|           | 1.01       | -0.25      | 0.4      |          |           |          |       |       |         |
| GENE2469X | 20118_at   | 20118_at   | 1        | -0.29    | -0.83     | -0.64    | 1.81  | -0.1  | -0.03   |
|           | 2.24       | 1.3        | 0.72     |          |           |          |       |       |         |
| GENE2103X | 18753_s_at | 18753_s_at | 1        | 0        | -0.84     | -0.84    | 2.6   | 1.67  | 0.44    |
|           | 3.23       | 1.89       | 0.71     |          |           |          |       |       |         |
| GENE2301X | 19549_s_at | 19549_s_at | 1        | -0.7     | -0.33     | -0.33    | 0.92  | 0.6   | 0.00738 |
|           | 2.23       | 1.11       | 0.39     |          |           |          |       |       |         |
| GENE2036X | 18599_at   | 18599_at   | 1        | 0.21     | 0.3       | 0.03     | 2.12  | 1.32  | 0.24    |
|           | 2.34       | 0.86       | 1        |          |           |          |       |       |         |
| GENE2566X | 20384_at   | 20384_at   | 1        | 0.07     | 0.32      | 0.62     | 2.28  | 1.17  | 1.56    |
|           | 3.14       | 1.68       | 1.63     |          |           |          |       |       |         |
| GENE1212X | 15894_at   | 15894_at   | 1        | 0.21     | -0.07     | -0.07    | 1.14  | 0.51  | 0.6     |
|           | 1.29       | 0.54       | 0.5      |          |           |          |       |       |         |
| GENE369X  | 13140_at   | 13140_at   | 1        | 0.05     | 0.08      | -0.00538 |       | 0.75  | 0.26    |
|           | 0.24       | 1.01       | 0.39     | 0.45     |           |          |       |       |         |
| GENE795X  | 14613_at   | 14613_at   | 1        | 0.28     | -0.58     | -0.58    | 1.48  | -1    | 0.26    |
|           | 3.84       | 1          | 1.67     |          |           |          |       |       |         |
| GENE1408X | 16446_at   | 16446_at   | 1        | 0.29     | -0.000624 |          | -0.2  | 0.61  | -0.31   |
|           | 0.25       | 1.12       | -0.00961 | 0.56     |           |          |       |       |         |
| GENE2053X | 18636_at   | 18636_at   | 1        | -0.15    | -0.2      | 0        | 1.34  | -0.2  | 1.09    |
|           | 0.56       | 0.52       |          |          |           |          |       |       | 2       |
| GENE1234X | 15965_at   | 15965_at   | 1        | -0.48    | 0.19      | -0.48    | 1.83  | 0.36  | 0.89    |
|           | 3.36       | 0.12       | 0.34     |          |           |          |       |       |         |
| GENE299X  | 12947_at   | 12947_at   | 1        | 0.81     | -0.16     | -0.03    | 0.67  | 0.09  | -0.39   |
|           | 1.86       | 0.51       | 0.41     |          |           |          |       |       |         |
| GENE804X  | 14636_s_at | 14636_s_at | 1        | 1.61     | -0.2      | 0.22     | 1.48  | 0.88  | -0.81   |
|           | 1.75       | 0.84       | -0.48    |          |           |          |       |       |         |
| GENE2150X | 18949_at   | 18949_at   | 1        | 0.74     | 1         | 1.19     | -0.09 | -0.33 | 0.9     |
|           | 1.87       | 2.12       | 2.39     |          |           |          |       |       |         |
| GENE2342X | 19707_s_at | 19707_s_at | 1        | 0.49     | 0.76      | 1.06     | -0.19 | -0.56 | 0.52    |
|           | 1.64       | 1.96       | 2.27     |          |           |          |       |       |         |
| GENE80X   | 12198_at   | 12198_at   | 1        | 0.1      | 0.75      | 1.19     | -0.57 | -0.57 | 0.36    |
|           | 1.14       | 1.05       | 1.18     |          |           |          |       |       |         |
| GENE1406X | 16440_at   | 16440_at   | 1        | 0.24     | 2.06      | 2.78     | -1.03 | 0.85  | 1.78    |
|           | 1.97       | 3.02       | 2.89     |          |           |          |       |       |         |
| GENE1313X | 16130_s_at | 16130_s_at | 1        | -0.32    | 1.26      | 1.79     | -0.56 | 0.77  | 0.4     |
|           | 1.06       | 2.32       | 1.71     |          |           |          |       |       |         |

|           |            |            |      |       |       |      |          |      |      |
|-----------|------------|------------|------|-------|-------|------|----------|------|------|
| GENE773X  | 14553_at   | 14553_at   | 1    | 0.85  | 1.77  | 2.04 | -1.15    | 0.5  | 0.18 |
|           | 0.44       | 2.15       | 2.06 |       |       |      |          |      |      |
| GENE2126X | 18888_at   | 18888_at   | 1    | 1.92  | 2.07  | 2.26 | 0        | 1.26 | 2.76 |
|           | 2.43       | 3.2        | 4.7  |       |       |      |          |      |      |
| GENE671X  | 14097_at   | 14097_at   | 1    | 1.75  | 1.39  | 1.75 | 0        | 0.5  | 2.4  |
|           | 1.89       | 2.19       | 3.12 |       |       |      |          |      |      |
| GENE1156X | 15665_at   | 15665_at   | 1    | 0.89  | 2.45  | 2.55 | 0.67     | 1.11 | 2.53 |
|           | 3.51       | 3.91       | 4.88 |       |       |      |          |      |      |
| GENE2097X | 18738_f_at | 18738_f_at | 1    | 1     | 1.11  | 0.87 | 0.23     | 0.55 | 1.04 |
|           | 1.38       | 1.97       | 1.88 |       |       |      |          |      |      |
| GENE1419X | 16465_at   | 16465_at   | 1    | 1.15  | 2.2   | 2.09 | -0.00404 |      | 2.06 |
|           | 1.18       | 2.68       | 3.97 |       |       |      |          |      |      |
| GENE1550X | 16916_s_at | 16916_s_at | 1    | 1.34  | 2.51  | 2.51 | -0.06    | 2.44 | 1.46 |
|           | 2.7        | 4.29       | 2.89 |       |       |      |          |      |      |
| GENE437X  | 13285_at   | 13285_at   | 1    | 0.92  | 1.43  | 1.11 | -0.59    | 1.51 | 0.84 |
|           | 1.44       | 2.99       | 2.42 |       |       |      |          |      |      |
| GENE60X   | 12150_at   | 12150_at   | 1    | 0.64  | 1.7   | 1.45 | 0.25     | 1.73 | 1.25 |
|           | 1.54       | 3.17       | 3.07 |       |       |      |          |      |      |
| GENE211X  | 12626_at   | 12626_at   | 1    | 0.46  | 1.48  | 1.29 | 0.06     | 1.73 | 1.15 |
|           | 1.62       | 2.88       | 2.27 |       |       |      |          |      |      |
| GENE311X  | 12989_at   | 12989_at   | 1    | 0     | 2.96  | 3.6  | -0.85    | 3.57 | 4.05 |
|           | 4.52       | 7.94       | 7.29 |       |       |      |          |      |      |
| GENE36X   | 12092_at   | 12092_at   | 1    | -0.16 | 0.95  | 1.25 | 0.17     | 1.32 | 1.16 |
|           | 1.97       | 2.45       | 2.16 |       |       |      |          |      |      |
| GENE2441X | 20023_at   | 20023_at   | 1    | 0.43  | 0.49  | 0.82 | -0.11    | 1.5  | 0.77 |
|           | 1.68       | 2.47       | 2.05 |       |       |      |          |      |      |
| GENE2023X | 18578_at   | 18578_at   | 1    | 0.67  | 0.32  | 0.32 | -0.48    | 0.36 | 0.23 |
|           | 0.21       | 0.95       | 1.13 |       |       |      |          |      |      |
| GENE574X  | 13706_at   | 13706_at   | 1    | 0.01  | 0.37  | 0.58 | -0.76    | 0.31 | 0.79 |
|           | 0.57       | 1.6        | 1.9  |       |       |      |          |      |      |
| GENE1273X | 16049_s_at | 16049_s_at | 1    | 0.36  | 0.84  | 0.71 | -0.83    | 0.48 | 0.59 |
|           | 0.99       | 1.65       | 1.42 |       |       |      |          |      |      |
| GENE1420X | 16466_s_at | 16466_s_at | 1    | 0.8   | 1.13  | 0.88 | -0.25    | 1.12 | 1.02 |
|           | 2.14       | 3.32       | 3.07 |       |       |      |          |      |      |
| GENE1233X | 15960_at   | 15960_at   | 1    | 0.56  | 0.93  | 0.64 | -0.51    | 0.6  | 0.44 |
|           | 1.82       | 2.69       | 2.47 |       |       |      |          |      |      |
| GENE2146X | 18945_at   | 18945_at   | 1    | 0.05  | 0.49  | 0.3  | -0.59    | 1    | 0.65 |
|           | 1.96       | 2.73       | 2.29 |       |       |      |          |      |      |
| GENE1081X | 15488_at   | 15488_at   | 1    | 0.1   | -0.09 | 0.46 | -0.3     | 0.14 | 0.31 |
|           | 0.87       | 1.15       | 1.11 |       |       |      |          |      |      |
| GENE445X  | 13312_at   | 13312_at   | 1    | 0     | 3.8   | 4.35 | 2.06     | 4.04 | 2.86 |
|           | 3.4        | 4.91       | 2.84 |       |       |      |          |      |      |
| GENE1769X | 17653_at   | 17653_at   | 1    | 0.25  | 3.26  | 2.74 | 1.19     | 2.91 | 1.86 |
|           | 2.58       | 3.38       | 2.33 |       |       |      |          |      |      |
| GENE1182X | 15779_g_at | 15779_g_at | 1    | 0.55  | 3.16  | 2.97 | 0.95     | 3.25 | 1.3  |
|           | 2.35       | 3.64       | 1.82 |       |       |      |          |      |      |
| GENE1056X | 15424_at   | 15424_at   | 1    | 0     | 5.09  | 5    | 2.88     | 4.33 | 2.58 |
|           | 2.92       | 3.63       | 2.2  |       |       |      |          |      |      |
| GENE2236X | 19263_at   | 19263_at   | 1    | 0.7   | 2.61  | 3.24 | 0.77     | 2.02 | 2.12 |
|           | 2.38       | 3.27       | 1.05 |       |       |      |          |      |      |
| GENE1343X | 16232_s_at | 16232_s_at | 1    | 1.05  | 3.13  | 3.96 | 2.21     | 2.65 | 2.85 |
|           | 2.39       | 3.45       | 1.69 |       |       |      |          |      |      |
| GENE1484X | 16609_at   | 16609_at   | 1    | 0.3   | 1.37  | 2.65 | 1.51     | 1.42 | 0.59 |
|           | 1.34       | 2.73       | 1.9  |       |       |      |          |      |      |
| GENE609X  | 13933_at   | 13933_at   | 1    | 0.2   | 1.37  | 1.85 | 1.35     | 1.01 | 0.75 |
|           | 1.77       | 1.67       | 1.52 |       |       |      |          |      |      |

|           |            |            |      |       |      |      |       |      |       |   |
|-----------|------------|------------|------|-------|------|------|-------|------|-------|---|
| GENE610X  | 13934_g_at | 13934_g_at | 1    | 0.49  | 1.59 | 1.88 | 1.24  | 0.95 | 0.73  |   |
|           | 1.52       | 1.36       | 1.07 |       |      |      |       |      |       |   |
| GENE587X  | 13834_at   | 13834_at   | 1    | 0.8   | 2.83 | 3.15 | 1.05  | 2.3  | 1.25  |   |
|           | 3.03       | 3.32       | 2.84 |       |      |      |       |      |       |   |
| GENE1920X | 18216_at   | 18216_at   | 1    | 1.27  | 2.82 | 3.13 | 1.27  | 1.76 | 2.05  |   |
|           | 2.99       | 3.22       | 3.04 |       |      |      |       |      |       |   |
| GENE1921X | 18217_g_at | 18217_g_at | 1    | 1.39  | 3.37 | 3.59 | 1.51  | 1.82 | 2.09  |   |
|           | 2.94       | 3.29       | 3.01 |       |      |      |       |      |       |   |
| GENE1386X | 16373_i_at | 16373_i_at | 1    | 0.84  | 3    | 3.17 | 0.09  | 1.97 | 0.94  |   |
|           | 1.92       | 3.45       | 2.84 |       |      |      |       |      |       |   |
| GENE320X  | 13015_s_at | 13015_s_at | 1    | 0.98  | 3.37 | 3.69 | 0.21  | 2.91 | 2.26  |   |
|           | 2.17       | 3.91       | 2.95 |       |      |      |       |      |       |   |
| GENE2031X | 18591_at   | 18591_at   | 1    | 0.67  | 1.93 | 2.31 | 0.08  | 1.67 | 1.49  |   |
|           | 1.41       | 2.48       | 2.17 |       |      |      |       |      |       |   |
| GENE417X  | 13246_at   | 13246_at   | 1    | -0.15 | 1.63 | 2.08 | 0.51  | 1.53 | 1.83  | 1 |
|           | 2          | 1.55       |      |       |      |      |       |      |       |   |
| GENE1594X | 17047_at   | 17047_at   | 1    | 0.71  | 1.8  | 2.17 | 0.56  | 1.18 | 1.65  |   |
|           | 1.12       | 1.76       | 1.77 |       |      |      |       |      |       |   |
| GENE2490X | 20182_at   | 20182_at   | 1    | 0.32  | 1.15 | 1.52 | 0.04  | 0.88 | 1.09  |   |
|           | 0.96       | 1.19       | 1.2  |       |      |      |       |      |       |   |
| GENE2302X | 19555_at   | 19555_at   | 1    | 1.41  | 3.43 | 1.66 | 0.67  | 2.86 | 0.41  |   |
|           | 2.45       | 3.45       | 2.04 |       |      |      |       |      |       |   |
| GENE2594X | 20461_at   | 20461_at   | 1    | 0.94  | 1.4  | 1.16 | 0.29  | 1.65 | -0.06 |   |
|           | 1.83       | 1.93       | 1.32 |       |      |      |       |      |       |   |
| GENE22X   | 12037_at   | 12037_at   | 1    | 1.12  | 1.27 | 1.29 | -0.12 | 0.75 | 0.76  |   |
|           | 1.56       | 1.48       | 1.17 |       |      |      |       |      |       |   |
| GENE388X  | 13175_s_at | 13175_s_at | 1    | 0.84  | 0.8  | 0.67 | 0.08  | 0.38 | 0.33  |   |
|           | 1.05       | 0.86       | 0.51 |       |      |      |       |      |       |   |
| GENE390X  | 13177_at   | 13177_at   | 1    | 0.42  | 2.49 | 2.16 | 0.44  | 1.6  | 0.57  |   |
|           | 1.61       | 1.99       | 1.38 |       |      |      |       |      |       |   |
| GENE685X  | 14250_r_at | 14250_r_at | 1    | 1.2   | 2.9  | 2.38 | 0.69  | 1.68 | 0.61  |   |
|           | 2.29       | 2.49       | 1.55 |       |      |      |       |      |       |   |
| GENE684X  | 14249_i_at | 14249_i_at | 1    | 0.89  | 2.41 | 2.05 | 0.41  | 1.55 | 0.46  |   |
|           | 1.86       | 2.11       | 1.18 |       |      |      |       |      |       |   |
| GENE2368X | 19848_s_at | 19848_s_at | 1    | 0.76  | 1.35 | 1.06 | 0.13  | 0.5  | 0.19  |   |
|           | 0.89       | 1.09       | 0.73 |       |      |      |       |      |       |   |
| GENE863X  | 14882_at   | 14882_at   | 1    | 2.71  | 5.08 | 5.31 | 0.9   | 3.58 | 3.11  |   |
|           | 2.52       | 4.51       | 3.69 |       |      |      |       |      |       |   |
| GENE1807X | 17894_at   | 17894_at   | 1    | 1.23  | 2.33 | 2.52 | 0.37  | 1.78 | 1.36  |   |
|           | 1.5        | 2.41       | 2.22 |       |      |      |       |      |       |   |
| GENE643X  | 14030_at   | 14030_at   | 1    | 2.14  | 3.21 | 3.48 | 0.79  | 2.63 | 1.58  |   |
|           | 2.14       | 3.29       | 2.14 |       |      |      |       |      |       |   |
| GENE1629X | 17180_at   | 17180_at   | 1    | 1.54  | 3.55 | 3.49 | 1.15  | 2.5  | 1.17  |   |
|           | 2.07       | 2.7        | 1.88 |       |      |      |       |      |       |   |
| GENE2051X | 18631_at   | 18631_at   | 1    | 1.84  | 4.2  | 4.54 | 0.43  | 2.79 | 1.66  |   |
|           | 1.84       | 3.02       | 2.2  |       |      |      |       |      |       |   |
| GENE1057X | 15431_at   | 15431_at   | 1    | 0.9   | 3.8  | 3.41 | 0.55  | 2.45 | 1.42  |   |
|           | 1.83       | 2.65       | 1.86 |       |      |      |       |      |       |   |
| GENE1656X | 17323_at   | 17323_at   | 1    | 0.35  | 1.81 | 1.83 | 0.75  | 0.75 | 0.05  |   |
|           | 0.9        | 1.35       | 0.92 |       |      |      |       |      |       |   |
| GENE2056X | 18641_at   | 18641_at   | 1    | -0.09 | 1.67 | 1.35 | -0.53 | 1.45 | 0.03  |   |
|           | 0.16       | 0.81       | 0.6  |       |      |      |       |      |       |   |
| GENE1697X | 17445_at   | 17445_at   | 1    | 0.51  | 1.78 | 1.59 | 0.04  | 1.46 | -0.13 |   |
|           | 0.94       | 0.65       | 0.7  |       |      |      |       |      |       |   |
| GENE2270X | 19426_s_at | 19426_s_at | 1    | 0.57  | 1.72 | 1.58 | 0.07  | 1.02 | 0.08  |   |
|           | 0.39       | 0.75       | 0.63 |       |      |      |       |      |       |   |

|           |            |            |      |       |      |      |       |      |       |
|-----------|------------|------------|------|-------|------|------|-------|------|-------|
| GENE2659X | 20653_s_at | 20653_s_at | 1    | 0.6   | 2.36 | 1.61 | 0.16  | 1.2  | -0.21 |
|           | 0.58       | 0.62       | 0.2  |       |      |      |       |      |       |
| GENE37X   | 12094_at   | 12094_at   | 1    | 1.58  | 5.08 | 5.37 | -0.36 | 0.28 | 0.33  |
|           | 1.53       | 2.07       | 2.35 |       |      |      |       |      |       |
| GENE1005X | 15203_s_at | 15203_s_at | 1    | -0.03 | 1.53 | 1.57 | -0.3  | 0.22 | -0.07 |
|           | 0.71       | 1.01       | 0.92 |       |      |      |       |      |       |
| GENE2667X | 20685_at   | 20685_at   | 1    | 1.29  | 1.36 | 2.04 | 0.78  | 2.04 | 2.86  |
|           | 0.5        | 1.32       | 1.9  |       |      |      |       |      |       |
| GENE652X  | 14057_at   | 14057_at   | 1    | 0.66  | 0.77 | 0.81 | 0.5   | 0.93 | 1.21  |
|           | 0.29       | 0.66       | 0.97 |       |      |      |       |      |       |
| GENE1903X | 18121_s_at | 18121_s_at | 1    | 2     | 2.67 | 3.58 | 1.52  | 2.83 | 4.19  |
|           | 1.83       | 2.76       | 3.25 |       |      |      |       |      |       |
| GENE2486X | 20168_s_at | 20168_s_at | 1    | 1.23  | 1.5  | 1.8  | 0.74  | 1.25 | 2.16  |
|           | 0.7        | 1.06       | 1.97 |       |      |      |       |      |       |
| GENE806X  | 14640_at   | 14640_at   | 1    | 1.95  | 2.24 | 2.38 | 2.26  | 2.36 | 3.69  |
|           | 0.55       | 1.17       | 2.3  |       |      |      |       |      |       |
| GENE2189X | 19128_at   | 19128_at   | 1    | 1.07  | 1.08 | 0.88 | 0.96  | 1.34 | 1.6   |
|           | 0.39       | 0.66       | 1.18 |       |      |      |       |      |       |
| GENE1978X | 18330_at   | 18330_at   | 1    | 0.77  | 0.85 | 0.78 | 0.61  | 1.22 | 1.3   |
|           | 0.27       | 0.69       | 0.77 |       |      |      |       |      |       |
| GENE1565X | 16968_at   | 16968_at   | 1    | 2.89  | 2.94 | 3.38 | 1.45  | 3.55 | 3.85  |
|           | 0.36       | 2.28       | 1.98 |       |      |      |       |      |       |
| GENE1778X | 17748_at   | 17748_at   | 1    | 2.7   | 3.37 | 3.39 | 1.92  | 3.03 | 3.98  |
|           | 0.16       | 1.58       | 1.94 |       |      |      |       |      | -     |
| GENE353X  | 13115_at   | 13115_at   | 1    | 1.72  | 2.74 | 3.17 | 1.87  | 2.54 | 4.01  |
|           | 0.45       | 2.16       | 2.3  |       |      |      |       |      |       |
| GENE567X  | 13685_at   | 13685_at   | 1    | 1.46  | 2.23 | 3.42 | 1.27  | 2.59 | 3.48  |
|           | 0.23       | 1.51       | 2.1  |       |      |      |       |      |       |
| GENE2521X | 20258_at   | 20258_at   | 1    | 1.36  | 1.79 | 2.06 | 0.78  | 2.11 | 3.03  |
|           | 0.48       | 1.15       | 1.4  |       |      |      |       |      |       |
| GENE796X  | 14614_at   | 14614_at   | 1    | 1.05  | 1.56 | 1.77 | 0.87  | 1.75 | 2.37  |
|           | 0.3        | 0.7        | 1.12 |       |      |      |       |      |       |
| GENE1340X | 16222_at   | 16222_at   | 1    | 2.33  | 2.86 | 2.41 | 2.72  | 4.29 | 4.79  |
|           | 0.26       | 2.58       | 3.29 |       |      |      |       |      | -     |
| GENE2453X | 20059_at   | 20059_at   | 1    | 1.58  | 1.37 | 1.48 | 1.24  | 2.2  | 2.42  |
|           | 0.58       | 1.36       | 1.45 |       |      |      |       |      | -     |
| GENE2533X | 20287_at   | 20287_at   | 1    | 1.57  | 1.64 | 1.2  | 1.26  | 2.01 | 2.32  |
|           | 0.18       | 0.96       | 1.48 |       |      |      |       |      | -     |
| GENE407X  | 13219_at   | 13219_at   | 1    | 1.89  | 1.92 | 1.51 | 1.39  | 2.21 | 2.35  |
|           | 0.25       | 0.93       | 1.2  |       |      |      |       |      | -     |
| GENE2407X | 19948_at   | 19948_at   | 1    | 0.67  | 0.8  | 0.59 | 0.38  | 0.62 | 1.02  |
|           | 0.1        | 0.52       | 0.54 |       |      |      |       |      | -     |
| GENE2574X | 20405_at   | 20405_at   | 1    | 1.01  | 1.44 | 1.27 | 0.56  | 1.15 | 1.6   |
|           | 0.19       | 0.19       | 0.93 |       |      |      |       |      |       |
| GENE2376X | 19871_at   | 19871_at   | 1    | 0.68  | 0.79 | 0.86 | 0.25  | 0.83 | 1.14  |
|           | 0.23       | 0.28       |      |       |      |      |       |      | 0     |
| GENE680X  | 14130_at   | 14130_at   | 1    | 0.75  | 0.88 | 0.75 | 0.55  | 0.79 | 1.79  |
|           | 0.37       | 0.22       | 0.61 |       |      |      |       |      |       |
| GENE632X  | 14016_s_at | 14016_s_at | 1    | 3.55  | 3.95 | 3.83 | 2.13  | 2.8  | 5.67  |
|           | 3.58       | 5.51       |      |       |      |      |       |      | 0     |
| GENE167X  | 12480_s_at | 12480_s_at | 1    | 1.56  | 2.09 | 2.35 | 0.85  | 1.29 | 3.02  |
|           | 0.16       | 1.13       | 2.38 |       |      |      |       |      |       |
| GENE1001X | 15195_s_at | 15195_s_at | 1    | 1.43  | 1.84 | 2.16 | 0.39  | 0.92 | 2.44  |
|           | 0.39       | 1.46       | 2.67 |       |      |      |       |      |       |
| GENE2297X | 19531_at   | 19531_at   | 1    | 1.95  | 2.28 | 2.27 | 0.66  | 1.49 | 2.41  |
|           | 0.73       | 1.7        | 2.51 |       |      |      |       |      |       |

|           |            |            |      |      |      |      |      |      |      |   |
|-----------|------------|------------|------|------|------|------|------|------|------|---|
| GENE2485X | 20167_i_at | 20167_i_at | 1    | 1.76 | 2.19 | 2.37 | 0.74 | 1.18 | 2.13 |   |
|           | 0.65       | 1.38       | 2.03 |      |      |      |      |      |      |   |
| GENE694X  | 14320_at   | 14320_at   | 1    | 1.6  | 2.2  | 2.96 | 1.23 | 1.62 | 2.49 |   |
|           | 0.73       | 1.74       | 2.2  |      |      |      |      |      |      |   |
| GENE1345X | 16236_g_at | 16236_g_at | 1    | 1.67 | 1.48 | 2    | 0.71 | 1.17 | 2.24 |   |
|           | 0.65       | 1.14       | 1.53 |      |      |      |      |      |      |   |
| GENE33X   | 12079_s_at | 12079_s_at | 1    | 3.32 | 3.39 | 3.14 | 2    | 1.26 | 3.74 |   |
|           | 1.58       | 1.84       | 3.58 |      |      |      |      |      |      |   |
| GENE134X  | 12349_s_at | 12349_s_at | 1    | 1.7  | 2.25 | 2.5  | 0.98 | 1.05 | 2.61 |   |
|           | 1.37       | 1.16       | 2.6  |      |      |      |      |      |      |   |
| GENE541X  | 13631_at   | 13631_at   | 1    | 1.5  | 1.98 | 2.39 | 1.4  | 1.08 | 2.91 |   |
|           | 1.29       | 0.95       | 2.38 |      |      |      |      |      |      |   |
| GENE45X   | 12115_at   | 12115_at   | 1    | 2.31 | 2.46 | 2.65 | 2.43 | 2.16 | 4.13 |   |
|           | 0.74       | 1.1        | 3.69 |      |      |      |      |      |      |   |
| GENE1053X | 15415_at   | 15415_at   | 1    | 2.13 | 2.63 | 2.2  | 1.66 | 1.9  | 4.08 |   |
|           | 1.12       | 0.93       | 3.43 |      |      |      |      |      |      |   |
| GENE1684X | 17413_s_at | 17413_s_at | 1    | 2.18 | 2.16 | 2.2  | 1.61 | 1.21 | 2.11 |   |
|           | 0.66       | 0.61       | 1.91 |      |      |      |      |      |      |   |
| GENE532X  | 13615_at   | 13615_at   | 1    | 1.07 | 1.07 | 1.12 | 0.54 | 0.5  | 1.02 |   |
|           | 0.16       | 0.13       | 1.01 |      |      |      |      |      |      |   |
| GENE2364X | 19840_s_at | 19840_s_at | 1    | 1.9  | 1.89 | 2.02 | 1.94 | 1.43 | 2.8  | - |
|           | 0.27       | 0.02       | 2.52 |      |      |      |      |      |      |   |
| GENE2385X | 19892_at   | 19892_at   | 1    | 1.07 | 1.24 | 0.92 | 0.82 | 0.86 | 1.84 | - |
|           | 0.13       | 0.15       | 1.75 |      |      |      |      |      |      |   |
| GENE1574X | 16989_at   | 16989_at   | 1    | 0.53 | 1.13 | 1.34 | 1.22 | 0.41 | 1.87 |   |
|           | 0.18       | 0.35       | 1.85 |      |      |      |      |      |      |   |
| GENE195X  | 12566_at   | 12566_at   | 1    | 2.1  | 2.37 | 2.07 | 1.93 | 1.32 | 3.13 |   |
|           | 2.3        | 0.48       | 2.04 |      |      |      |      |      |      |   |
| GENE1796X | 17862_at   | 17862_at   | 1    | 0.47 | 0.89 | 0.92 | 0.82 | 0.97 | 1.28 |   |
|           | 0.85       | 0.17       | 0.69 |      |      |      |      |      |      |   |
| GENE117X  | 12307_at   | 12307_at   | 1    | 3.74 | 3.61 | 3.5  | 2.15 | 2.98 | 2.84 |   |
|           | 1.63       | 2.24       | 3.24 |      |      |      |      |      |      |   |
| GENE2445X | 20034_i_at | 20034_i_at | 1    | 4.36 | 4.68 | 4.45 | 3.56 | 3.07 | 3.96 |   |
|           | 3.58       | 3.48       | 4.24 |      |      |      |      |      |      |   |
| GENE1323X | 16150_at   | 16150_at   | 1    | 1.96 | 2.01 | 1.89 | 1.37 | 1.33 | 1.15 |   |
|           | 1.37       | 1.14       | 1.96 |      |      |      |      |      |      |   |
| GENE2138X | 18928_at   | 18928_at   | 1    | 1.48 | 1.65 | 1.39 | 1.24 | 1.01 | 1.15 |   |
|           | 1.04       | 0.3        | 0.72 |      |      |      |      |      |      |   |
| GENE1280X | 16059_at   | 16059_at   | 1    | 1.15 | 2.81 | 2.73 | 1.49 | 2.42 | 1.92 |   |
|           | 0.98       | 1.97       | 1.88 |      |      |      |      |      |      |   |
| GENE1166X | 15680_s_at | 15680_s_at | 1    | 0.58 | 2.08 | 2.44 | 1.23 | 2.1  | 2    |   |
|           | 1.26       | 1.59       | 1.33 |      |      |      |      |      |      |   |
| GENE1179X | 15775_at   | 15775_at   | 1    | 1.19 | 2.97 | 2.72 | 2.24 | 3.13 | 2.22 |   |
|           | 2.98       | 2.61       | 1.65 |      |      |      |      |      |      |   |
| GENE1201X | 15859_at   | 15859_at   | 1    | 1.13 | 2.61 | 2.41 | 1.76 | 2.76 | 1.64 |   |
|           | 1.95       | 1.27       | 0.81 |      |      |      |      |      |      |   |
| GENE2438X | 20017_at   | 20017_at   | 1    | 0.62 | 2.01 | 1.88 | 0.69 | 1.41 | 0.58 |   |
|           | 0.94       | 0.82       | 1.22 |      |      |      |      |      |      |   |
| GENE612X  | 13942_at   | 13942_at   | 1    | 0.73 | 1.67 | 1.76 | 1.02 | 0.93 | 1.19 |   |
|           | 1.17       | 0.98       | 1.23 |      |      |      |      |      |      |   |
| GENE2287X | 19464_at   | 19464_at   | 1    | 0.92 | 1.67 | 1.65 | 0.84 | 1.08 | 0.92 |   |
|           | 1.01       | 0.47       | 0.71 |      |      |      |      |      |      |   |
| GENE230X  | 12737_f_at | 12737_f_at | 1    | 2.12 | 3.5  | 4.47 | 1.75 | 1.49 | 3.27 |   |
|           | 1.26       | 1.79       | 2.51 |      |      |      |      |      |      |   |
| GENE1284X | 16064_s_at | 16064_s_at | 1    | 0.96 | 1.42 | 1.91 | 0.95 | 0.76 | 1.44 |   |
|           | 0.46       | 0.44       | 1.11 |      |      |      |      |      |      |   |

|           |            |            |      |      |      |      |       |      |      |   |
|-----------|------------|------------|------|------|------|------|-------|------|------|---|
| GENE1704X | 17464_at   | 17464_at   | 1    | 0.96 | 1.37 | 1.56 | 0.79  | 0.75 | 1.12 |   |
|           | 0.48       | 0.35       | 0.61 |      |      |      |       |      |      |   |
| GENE2554X | 20346_at   | 20346_at   | 1    | 1.09 | 2.12 | 2.27 | 0.62  | 1.56 | 1.78 |   |
|           | 0.85       | 0.78       | 1.07 |      |      |      |       |      |      |   |
| GENE1650X | 17300_at   | 17300_at   | 1    | 0.39 | 1.24 | 1.6  | 0.55  | 0.8  | 1.27 |   |
|           | 0.47       | 0.33       | 0.47 |      |      |      |       |      |      |   |
| GENE2522X | 20259_at   | 20259_at   | 1    | 1.48 | 2.33 | 1.98 | 1.58  | 2.46 | 2.16 |   |
|           | 0.62       | 1.68       | 1.05 |      |      |      |       |      |      |   |
| GENE1719X | 17507_at   | 17507_at   | 1    | 0.67 | 1.44 | 1.57 | 1.22  | 1.56 | 1.11 |   |
|           | 0.32       | 0.76       | 0.74 |      |      |      |       |      |      |   |
| GENE123X  | 12317_at   | 12317_at   | 1    | 0.78 | 1.47 | 1.55 | 0.95  | 1.46 | 1.49 |   |
|           | 0.75       | 0.49       | 0.64 |      |      |      |       |      |      |   |
| GENE823X  | 14686_at   | 14686_at   | 1    | 0.77 | 1.46 | 1.66 | 1.6   | 1.6  | 1.69 |   |
|           | 0.76       | 0.75       | 0.38 |      |      |      |       |      |      |   |
| GENE213X  | 12630_at   | 12630_at   | 1    | 3.09 | 3.4  | 3.16 | 0.5   | 0.77 | 2.23 |   |
|           | 0.27       | 0.21       | 2.95 |      |      |      |       |      |      |   |
| GENE2513X | 20238_at   | 20238_at   | 1    | 1.14 | 1.16 | 0.87 | 0.19  | 0.23 | 1.21 | - |
|           | 0.03       | 0.06       | 1.01 |      |      |      |       |      |      |   |
| GENE2575X | 20406_g_at | 20406_g_at | 1    | 0.89 | 1.26 | 1.64 | -0.09 | 0.68 | 1.23 | - |
|           | 0.15       | -0.01      | 1.05 |      |      |      |       |      |      |   |
| GENE1135X | 15620_s_at | 15620_s_at | 1    | 0.93 | 1.4  | 1.84 | 0.31  | 0.28 | 1.16 | - |
|           | 0.25       | 0.18       | 1.06 |      |      |      |       |      |      |   |
| GENE2444X | 20032_at   | 20032_at   | 1    | 0.72 | 0.84 | 0.88 | -0.22 | 0.27 | 0.66 | - |
|           | 0.08       | 0.49       | 1.09 |      |      |      |       |      |      |   |
| GENE2596X | 20463_s_at | 20463_s_at | 1    | 1.39 | 1.8  | 2.24 | 0.4   | 1.4  | 2.16 | - |
|           | 0.52       | 0.83       | 2.09 |      |      |      |       |      |      |   |
| GENE1391X | 16387_at   | 16387_at   | 1    | 2.32 | 3.07 | 3.56 | 0     | 2.26 | 3.58 | 0 |
|           | 1.76       | 3.43       |      |      |      |      |       |      |      |   |
| GENE1658X | 17338_at   | 17338_at   | 1    | 2.48 | 3.67 | 4.35 | 0     | 1.89 | 3.6  |   |
|           | 0.19       | 1.71       | 3.21 |      |      |      |       |      |      |   |
| GENE2532X | 20285_s_at | 20285_s_at | 1    | 1.21 | 1.88 | 1.91 | 0.32  | 0.89 | 2.07 | 0 |
|           | 0.86       | 1.36       |      |      |      |      |       |      |      |   |
| GENE337X  | 13078_at   | 13078_at   | 1    | 0.79 | 1.07 | 1.23 | 0.19  | 0.59 | 1.4  | - |
|           | 0.1        | 0.39       | 0.84 |      |      |      |       |      |      |   |
| GENE380X  | 13157_at   | 13157_at   | 1    | 1.02 | 1.3  | 1.67 | 0.27  | 0.32 | 1.45 | - |
|           | 0.04       | 0.62       | 1.44 |      |      |      |       |      |      |   |
| GENE1373X | 16340_at   | 16340_at   | 1    | 2.08 | 2.75 | 2.85 | 0.43  | 1.54 | 2.13 | - |
|           | 0.13       | 0.61       | 1.73 |      |      |      |       |      |      |   |
| GENE1394X | 16398_s_at | 16398_s_at | 1    | 2.72 | 4.59 | 5.04 | 0.78  | 2.53 | 3.49 |   |
|           | 0.36       | 2.01       | 2.42 |      |      |      |       |      |      |   |
| GENE1395X | 16409_at   | 16409_at   | 1    | 1.26 | 2.32 | 2.67 | -0.12 | 1.7  | 1.87 | 0 |
|           | 1.34       | 1.77       |      |      |      |      |       |      |      |   |
| GENE1639X | 17252_at   | 17252_at   | 1    | 0.97 | 1.51 | 1.56 | 0     | 1.22 | 1.18 |   |
|           | 0.07       | 1          | 1.11 |      |      |      |       |      |      |   |
| GENE502X  | 13559_at   | 13559_at   | 1    | 0.75 | 1.44 | 1.48 | 0.36  | 0.85 | 1.49 |   |
|           | 0.16       | 0.78       | 0.9  |      |      |      |       |      |      |   |
| GENE342X  | 13094_at   | 13094_at   | 1    | 0.77 | 1.77 | 2.21 | 0.35  | 1.47 | 1.79 |   |
|           | 0.28       | 1.07       | 1.48 |      |      |      |       |      |      |   |
| GENE244X  | 12764_f_at | 12764_f_at | 1    | 1.18 | 1.42 | 1.45 | 0.2   | 1.24 | 1.43 | - |
|           | 0.23       | 1.25       | 1.29 |      |      |      |       |      |      |   |
| GENE1276X | 16054_s_at | 16054_s_at | 1    | 1.15 | 1.37 | 1.24 | 0.36  | 1.09 | 1.15 |   |
|           | 0.02       | 0.87       | 1.31 |      |      |      |       |      |      |   |
| GENE1804X | 17882_at   | 17882_at   | 1    | 0.98 | 1.4  | 1.35 | 0.29  | 1.02 | 1.05 |   |
|           | 0.18       | 0.9        | 1.01 |      |      |      |       |      |      |   |
| GENE2409X | 19951_at   | 19951_at   | 1    | 1.67 | 1.95 | 1.42 | 0.33  | 0.96 | 0.93 |   |
|           | 1.27       | 1.49       | 2.06 |      |      |      |       |      |      |   |

|           |            |            |      |      |      |      |       |      |      |   |
|-----------|------------|------------|------|------|------|------|-------|------|------|---|
| GENE2558X | 20361_s_at | 20361_s_at | 1    | 1    | 0.88 | 1.03 | 0.22  | 0.55 | 0.37 |   |
|           | 0.64       | 0.84       | 1.05 |      |      |      |       |      |      |   |
| GENE23X   | 12042_at   | 12042_at   | 1    | 1.03 | 0.88 | 0.88 | 0.29  | 0.49 | 0.67 |   |
|           | 0.38       | 0.65       | 1.19 |      |      |      |       |      |      |   |
| GENE1831X | 17948_i_at | 17948_i_at | 1    | 1.06 | 0.92 | 0.89 | 0     | 0.3  | 0.32 |   |
|           | 0.48       | 0.64       | 0.77 |      |      |      |       |      |      |   |
| GENE376X  | 13152_s_at | 13152_s_at | 1    | 1    | 0.99 | 1.27 | -0.06 | 0.4  | 1.25 |   |
|           | 0.4        | 1.05       | 1.2  |      |      |      |       |      |      |   |
| GENE2100X | 18745_f_at | 18745_f_at | 1    | 1.51 | 1.73 | 1.54 | 0.49  | 0.35 | 1.65 |   |
|           | 0.96       | 1.12       | 1.09 |      |      |      |       |      |      |   |
| GENE225X  | 12712_f_at | 12712_f_at | 1    | 2    | 4.55 | 4.5  | 1.03  | 1.74 | 1.88 |   |
|           | 0.96       | 1.79       | 1.79 |      |      |      |       |      |      |   |
| GENE214X  | 12642_at   | 12642_at   | 1    | 1.62 | 3.02 | 3.51 | 0.01  | 1.23 | 1.14 |   |
|           | 0.39       | 1.4        | 1.6  |      |      |      |       |      |      |   |
| GENE1275X | 16053_i_at | 16053_i_at | 1    | 2.63 | 3.13 | 3.3  | 0.21  | 1.56 | 1.93 |   |
|           | 0.33       | 1.67       | 2.57 |      |      |      |       |      |      |   |
| GENE2435X | 20014_at   | 20014_at   | 1    | 1.02 | 0.97 | 1.12 | 0.17  | 0.62 | 0.58 |   |
|           | 0.3        | 0.7        | 0.76 |      |      |      |       |      |      |   |
| GENE957X  | 15118_s_at | 15118_s_at | 1    | 1.2  | 1.3  | 1.27 | 0.26  | 0.9  | 0.73 | - |
|           | 0.06       | 0.81       | 0.77 |      |      |      |       |      |      |   |
| GENE557X  | 13659_at   | 13659_at   | 1    | 3.77 | 4.72 | 4.61 | 2.35  | 3.72 | 2.41 |   |
|           | 1.81       | 2.64       | 1.83 |      |      |      |       |      |      |   |
| GENE2507X | 20223_at   | 20223_at   | 1    | 2.97 | 3.44 | 3.19 | 1.17  | 2.36 | 2.2  |   |
|           | 1.37       | 1.92       | 1.73 |      |      |      |       |      |      |   |
| GENE2182X | 19092_at   | 19092_at   | 1    | 2.19 | 2.64 | 2.49 | 0.5   | 1.62 | 1.46 |   |
|           | 0.73       | 1.15       | 1.1  |      |      |      |       |      |      |   |
| GENE970X  | 15139_s_at | 15139_s_at | 1    | 1.11 | 1.21 | 1.3  | 0.24  | 0.88 | 0.44 |   |
|           | 0.42       | 0.62       | 0.67 |      |      |      |       |      |      |   |
| GENE2039X | 18604_at   | 18604_at   | 1    | 1.66 | 3.03 | 2.91 | 1.15  | 2.04 | 1.85 |   |
|           | 1.58       | 1.95       | 1.64 |      |      |      |       |      |      |   |
| GENE2210X | 19181_s_at | 19181_s_at | 1    | 1.66 | 2.86 | 3    | 0.79  | 1.95 | 1.77 |   |
|           | 1.33       | 1.74       | 1.62 |      |      |      |       |      |      |   |
| GENE2285X | 19462_at   | 19462_at   | 1    | 2.35 | 3.59 | 3.64 | 0.88  | 2.71 | 2.59 |   |
|           | 1.29       | 2.71       | 2.95 |      |      |      |       |      |      |   |
| GENE1946X | 18268_s_at | 18268_s_at | 1    | 1.58 | 2.15 | 2.4  | 0.58  | 1.98 | 1.83 |   |
|           | 0.86       | 1.69       | 1.66 |      |      |      |       |      |      |   |
| GENE2006X | 18508_at   | 18508_at   | 1    | 1.38 | 3.04 | 3.31 | -0.3  | 1.74 | 2.81 | - |
|           | 0.24       | 3.01       | 3.14 |      |      |      |       |      |      |   |
| GENE1905X | 18126_at   | 18126_at   | 1    | 1.16 | 1.77 | 2.17 | -0.63 | 1.14 | 1.83 | - |
|           | 0.41       | 2.12       | 2    |      |      |      |       |      |      |   |
| GENE187X  | 12539_s_at | 12539_s_at | 1    | 0.93 | 2.32 | 2.67 | -0.28 | 1.67 | 1.34 |   |
|           | 0.43       | 2.03       | 2.37 |      |      |      |       |      |      |   |
| GENE288X  | 12892_g_at | 12892_g_at | 1    | 0.92 | 2.68 | 3.11 | -0.52 | 1.58 | 1.93 |   |
|           | 0.45       | 2.53       | 2.49 |      |      |      |       |      |      |   |
| GENE287X  | 12891_at   | 12891_at   | 1    | 0.91 | 2.53 | 2.99 | -0.48 | 1.48 | 1.82 |   |
|           | 0.4        | 2.31       | 2.26 |      |      |      |       |      |      |   |
| GENE2537X | 20294_at   | 20294_at   | 1    | 1.24 | 1.58 | 1.96 | -0.73 | 1.1  | 1.4  |   |
|           | 0.28       | 1.62       | 1.76 |      |      |      |       |      |      |   |
| GENE880X  | 14928_at   | 14928_at   | 1    | 1.38 | 2.38 | 2.63 | -0.68 | 1.14 | 1.37 |   |
|           | 0.75       | 2.2        | 1.72 |      |      |      |       |      |      |   |
| GENE1942X | 18263_at   | 18263_at   | 1    | 1.43 | 2.84 | 3.29 | -0.82 | 2.33 | 1.16 |   |
|           | 0.26       | 2.57       | 1.71 |      |      |      |       |      |      |   |
| GENE49X   | 12123_at   | 12123_at   | 1    | 0.74 | 1.71 | 2.24 | -0.37 | 1.28 | 0.77 | - |
|           | 0.41       | 1.58       | 1.49 |      |      |      |       |      |      |   |
| GENE2427X | 19992_at   | 19992_at   | 1    | 0.87 | 1.35 | 1.66 | -1    | 1.26 | 0.8  | - |
|           | 0.37       | 1.59       | 1.17 |      |      |      |       |      |      |   |





|           |            |            |       |       |       |       |       |       |       |
|-----------|------------|------------|-------|-------|-------|-------|-------|-------|-------|
| GENE2500X | 20199_at   | 20199_at   | 1     | 0.26  | 1.27  | 1.13  | 0.78  | 0.38  | -0.45 |
|           | 0.59       | 0.47       | 0.12  |       |       |       |       |       |       |
| GENE275X  | 12822_at   | 12822_at   | 1     | 0.29  | 0.59  | 1.05  | 0.23  | 0.34  | -0.1  |
|           | 0.11       | 0.27       | 0.09  |       |       |       |       |       |       |
| GENE915X  | 15040_g_at | 15040_g_at | 1     | 0.64  | 1.77  | 2     | 0.12  | 0.1   | -0.49 |
|           | 0.67       | -0.04      | -0.07 |       |       |       |       |       |       |
| GENE1612X | 17097_at   | 17097_at   | 1     | 1.16  | 1.2   | 1.5   | -0.13 | 0.04  | -0.11 |
|           | 0.2        | 0.26       | 0.18  |       |       |       |       |       |       |
| GENE228X  | 12730_f_at | 12730_f_at | 1     | 2.8   | 3.51  | 3.23  | 0.86  | 0.63  | 1.11  |
|           | 1.57       | 1.12       | 0.4   |       |       |       |       |       |       |
| GENE2619X | 20539_at   | 20539_at   | 1     | 1.08  | 1.18  | 1.01  | 0.03  | 0.37  | 0.07  |
|           | 0.62       | 0.45       | -0.01 |       |       |       |       |       |       |
| GENE1369X | 16331_at   | 16331_at   | 1     | 1.84  | 2.45  | 2.07  | 0.26  | 0.97  | 0.05  |
|           | 0.03       | 0.03       | 0.15  |       |       |       |       |       |       |
| GENE1643X | 17278_at   | 17278_at   | 1     | 2.93  | 2.43  | 2.77  | 0.75  | 1.68  | 0.44  |
|           | 0.3        | 0.31       | -0.09 |       |       |       |       |       |       |
| GENE2662X | 20662_g_at | 20662_g_at | 1     | 1.24  | 0.91  | 0.95  | 0.41  | 0.07  | 0.06  |
|           | 0.02       | -0.01      | 0.14  |       |       |       |       |       | -     |
| GENE1652X | 17317_at   | 17317_at   | 1     | 3.33  | 2.89  | 2.44  | 1.45  | 0.16  | -0.09 |
|           | 0.63       | -0.36      | -0.16 |       |       |       |       |       |       |
| GENE996X  | 15184_s_at | 15184_s_at | 1     | -0.22 | 1.12  | 0.91  | -0.19 | 0.91  | -0.6  |
|           | 0.52       | 1.28       | 0.06  |       |       |       |       |       |       |
| GENE1488X | 16617_s_at | 16617_s_at | 1     | 0.42  | 1.09  | 0.47  | -0.46 | 0.49  | -0.79 |
|           | 0.3        | 0.71       | -0.5  |       |       |       |       |       |       |
| GENE96X   | 12239_at   | 12239_at   | 1     | 0.49  | 1.23  | 0.54  | 1.14  | -0.35 | -0.79 |
|           | 0.67       | 0.71       | -0.36 |       |       |       |       |       |       |
| GENE2327X | 19655_at   | 19655_at   | 1     | 0.49  | 0.18  | 0.16  | 2.64  | 2.73  | 2.75  |
|           | 1.12       | 1.04       | 0.62  |       |       |       |       |       |       |
| GENE719X  | 14434_at   | 14434_at   | 1     | 0.35  | 0.11  | -0.08 | 1.42  | 1.75  | 1.51  |
|           | 0.63       | 0.36       | 0.15  |       |       |       |       |       |       |
| GENE1360X | 16303_at   | 16303_at   | 1     | 0.3   | 0.26  | -0.04 | 0.77  | 0.97  | 1.1   |
|           | 0.32       | 0.23       | 0.1   |       |       |       |       |       |       |
| GENE2202X | 19168_at   | 19168_at   | 1     | 0.13  | -0.02 | 0.1   | 0.53  | 0.98  | 1.07  |
|           | 0.41       | 0.16       | 0.14  |       |       |       |       |       |       |
| GENE1839X | 17964_at   | 17964_at   | 1     | 0.35  | 0.29  | 0.32  | 1.28  | 2.05  | 1.99  |
|           | 0.21       | 0.3        | 0.71  |       |       |       |       |       |       |
| GENE1533X | 16840_at   | 16840_at   | 1     | 0.2   | 0.32  | 0.45  | 2.05  | 3.36  | 3.05  |
|           | 0.04       | 0.51       | 0.67  |       |       |       |       |       |       |
| GENE1955X | 18282_at   | 18282_at   | 1     | 0.2   | 0.37  | 0.63  | 1.84  | 2.07  | 2.35  |
|           | 0.47       | 0.93       | 0.52  |       |       |       |       |       |       |
| GENE1133X | 15614_s_at | 15614_s_at | 1     | 0.13  | 0.3   | 0.35  | 0.62  | 1.06  | 1.13  |
|           | 0.09       | 0.44       | 0.01  |       |       |       |       |       |       |
| GENE2153X | 18954_at   | 18954_at   | 1     | 0.35  | 0.22  | -0.16 | 1.09  | 1.17  | 1.26  |
|           | 0.01       | 0.48       | 0.17  |       |       |       |       |       | -     |
| GENE1277X | 16055_s_at | 16055_s_at | 1     | 0.84  | 0.32  | 0.11  | 1.82  | 2.15  | 1.3   |
|           | 0.9        | 0.5        | 0.74  |       |       |       |       |       |       |
| GENE2641X | 20614_s_at | 20614_s_at | 1     | 0.48  | 0.24  | 0.11  | 1.02  | 1.31  | 0.91  |
|           | 0.38       | 0.1        | 0.19  |       |       |       |       |       |       |
| GENE1123X | 15598_s_at | 15598_s_at | 1     | 0.23  | 0.38  | 0.45  | 1.04  | 1.17  | 0.84  |
|           | 0.34       | 0.36       | 0.29  |       |       |       |       |       |       |
| GENE1552X | 16929_at   | 16929_at   | 1     | 0.13  | 0.13  | 0.05  | 0.85  | 1.65  | 0.79  |
|           | 0.15       | 0.56       | 0.34  |       |       |       |       |       |       |
| GENE2639X | 20611_at   | 20611_at   | 1     | 0.55  | 0.18  | 0.08  | 0.74  | 1.25  | 0.71  |
|           | 0.29       | 0.57       | 0.34  |       |       |       |       |       |       |
| GENE1187X | 15795_g_at | 15795_g_at | 1     | 0.8   | 0.45  | 0.36  | 1.55  | 2.12  | 1.75  |
|           | 0.29       | 0.73       | 0.27  |       |       |       |       |       |       |



|           |            |             |   |      |      |      |      |      |      |   |
|-----------|------------|-------------|---|------|------|------|------|------|------|---|
| GENE770X  | 14544_at   | 14544_at    | 1 | 0.09 | 1.15 | 1.25 | 1    | 1    | 0.77 |   |
|           | 0.28       | -0.02 -0.35 |   |      |      |      |      |      |      |   |
| GENE1627X | 17174_at   | 17174_at    | 1 | 0.71 | 0.46 | 0.52 | 1.4  | 1.7  | 1.4  |   |
|           | 1.01       | 0.93 0.24   |   |      |      |      |      |      |      |   |
| GENE2544X | 20314_s_at | 20314_s_at  | 1 | 0.35 | 0.37 | 0.43 | 0.7  | 1.15 | 0.78 |   |
|           | 0.89       | 0.47 0      |   |      |      |      |      |      |      |   |
| GENE2624X | 20560_at   | 20560_at    | 1 | 0.58 | 0.79 | 0.87 | 1.37 | 1.02 | 1.05 |   |
|           | 1.24       | 0.57 0.22   |   |      |      |      |      |      |      |   |
| GENE189X  | 12544_at   | 12544_at    | 1 | 0.68 | 1.47 | 1.3  | 1.84 | 2.13 | 0.84 |   |
|           | 1.26       | 1.13 0      |   |      |      |      |      |      |      |   |
| GENE786X  | 14592_at   | 14592_at    | 1 | 0.81 | 0.84 | 0.95 | 1    | 1.27 | 1.37 |   |
|           | 0.35       | 0.16 0.42   |   |      |      |      |      |      |      |   |
| GENE106X  | 12274_at   | 12274_at    | 1 | 1.45 | 0.92 | 1.03 | 0.95 | 1.78 | 1.91 |   |
|           | 0.31       | 0.73 0.34   |   |      |      |      |      |      |      |   |
| GENE2340X | 19698_at   | 19698_at    | 1 | 1.05 | 0.89 | 1.03 | 0.85 | 1.28 | 1.24 |   |
|           | 0.23       | 0.45 -0.13  |   |      |      |      |      |      |      |   |
| GENE1525X | 16786_at   | 16786_at    | 1 | 0.71 | 0.53 | 0.53 | 1.03 | 0.84 | 1.04 |   |
|           | 0.41       | -0.1 0      |   |      |      |      |      |      |      |   |
| GENE1077X | 15482_at   | 15482_at    | 1 | 0.76 | 0.54 | 0.68 | 1.7  | 1.34 | 2.22 |   |
|           | 0.39       | 0.35 -0.04  |   |      |      |      |      |      |      |   |
| GENE790X  | 14603_at   | 14603_at    | 1 | 1.41 | 1.12 | 0.84 | 1.32 | 1.35 | 0.44 |   |
|           | 0.37       | 0.04 0.28   |   |      |      |      |      |      |      |   |
| GENE1487X | 16615_s_at | 16615_s_at  | 1 | 1.96 | 1.89 | 1.67 | 4.18 | 2.13 | 1.92 | - |
|           | 0.8        | -0.1 0.09   |   |      |      |      |      |      |      |   |
| GENE1872X | 18045_at   | 18045_at    | 1 | 0.37 | 0.49 | 0.66 | 0.32 | 1.41 | 1.77 |   |
|           | 0.16       | 0.84 1.32   |   |      |      |      |      |      |      |   |
| GENE834X  | 14724_f_at | 14724_f_at  | 1 | 0.29 | 0.48 | 0.65 | 0.25 | 1.05 | 1.22 | - |
|           | 0.00621    | 0.72 1.03   |   |      |      |      |      |      |      |   |
| GENE989X  | 15174_f_at | 15174_f_at  | 1 | 0.05 | 0.25 | 0.43 | 0.46 | 1.09 | 1.02 | - |
|           | 0.03       | 0.71 0.84   |   |      |      |      |      |      |      |   |
| GENE2449X | 20051_at   | 20051_at    | 1 | 0.92 | 1.89 | 2.42 | 1.03 | 2.67 | 3.67 |   |
|           | 0.7        | 2.47 2.83   |   |      |      |      |      |      |      |   |
| GENE2320X | 19641_at   | 19641_at    | 1 | 1.76 | 1.37 | 2.32 | 1.19 | 3.05 | 4.28 |   |
|           | 0.19       | 2.4 3.07    |   |      |      |      |      |      |      |   |
| GENE851X  | 14786_at   | 14786_at    | 1 | 0.95 | 1.88 | 2.1  | 1.11 | 2.68 | 3.79 | - |
|           | 0.18       | 1.72 2.55   |   |      |      |      |      |      |      |   |
| GENE595X  | 13880_s_at | 13880_s_at  | 1 | 0.47 | 0.76 | 1.34 | 0.45 | 1.52 | 1.64 | - |
|           | 0.52       | 0.92 1.12   |   |      |      |      |      |      |      |   |
| GENE1144X | 15641_s_at | 15641_s_at  | 1 | 1.52 | 2.04 | 2.45 | 1.95 | 3.18 | 3.78 |   |
|           | 0.84       | 1.42 1.87   |   |      |      |      |      |      |      |   |
| GENE1857X | 18012_s_at | 18012_s_at  | 1 | 1.09 | 1.82 | 2.22 | 2.32 | 3.76 | 4.35 |   |
|           | 0.89       | 1.64 2.22   |   |      |      |      |      |      |      |   |
| GENE1967X | 18304_s_at | 18304_s_at  | 1 | 0.32 | 0.45 | 0.63 | 0.48 | 1.01 | 1.12 |   |
|           | 0.07       | 0.31 0.59   |   |      |      |      |      |      |      |   |
| GENE864X  | 14884_at   | 14884_at    | 1 | 1    | 1.38 | 1.62 | 1.91 | 3.2  | 3.15 |   |
|           | 0.43       | 1.23 1.16   |   |      |      |      |      |      |      |   |
| GENE164X  | 12467_at   | 12467_at    | 1 | 0.76 | 0.92 | 0.92 | 0.87 | 2    | 2.41 | 0 |
|           | 0.39       | 1.65        |   |      |      |      |      |      |      |   |
| GENE1546X | 16908_at   | 16908_at    | 1 | 0.54 | 0.42 | 0.66 | 0.69 | 1.16 | 1.38 | - |
|           | 0.05       | 0.5 0.76    |   |      |      |      |      |      |      |   |
| GENE2571X | 20397_at   | 20397_at    | 1 | 0.73 | 0.58 | 0.77 | 0.34 | 1.2  | 1.5  |   |
|           | 0.21       | 0.55 0.88   |   |      |      |      |      |      |      |   |
| GENE1782X | 17766_at   | 17766_at    | 1 | 0.51 | 0.3  | 0.32 | 0.32 | 0.96 | 1.04 |   |
|           | 0.09       | 0.25 0.45   |   |      |      |      |      |      |      |   |
| GENE291X  | 12912_at   | 12912_at    | 1 | 0.2  | 0.48 | 1.1  | 0.19 | 1.25 | 0.8  | - |
|           | 0.21       | 0.59 0.13   |   |      |      |      |      |      |      |   |

|           |            |            |       |      |      |      |      |      |      |   |
|-----------|------------|------------|-------|------|------|------|------|------|------|---|
| GENE2077X | 18686_at   | 18686_at   | 1     | 0.29 | 0.33 | 0.76 | 0.24 | 1.14 | 1.11 |   |
|           | 0.2        | 0.63       | 0.29  |      |      |      |      |      |      |   |
| GENE2418X | 19971_at   | 19971_at   | 1     | 0.33 | 0.13 | 0.71 | 0.15 | 1.3  | 0.85 |   |
|           | 0.29       | 0.29       | 0.24  |      |      |      |      |      |      |   |
| GENE678X  | 14122_at   | 14122_at   | 1     | 0.4  | 1.42 | 1.61 | 0.18 | 1.95 | 2.56 | - |
|           | 0.04       | 0.44       | 1.14  |      |      |      |      |      |      |   |
| GENE1821X | 17925_at   | 17925_at   | 1     | 0.33 | 0.47 | 0.96 | 0.32 | 1.04 | 1.26 | - |
|           | 0.31       | 0.17       | 0.57  |      |      |      |      |      |      |   |
| GENE2573X | 20402_at   | 20402_at   | 1     | 0.42 | 0.59 | 0.91 | 0.52 | 1.06 | 1.69 | - |
|           | 0.28       | 0.46       | 0.37  |      |      |      |      |      |      |   |
| GENE2654X | 20645_s_at | 20645_s_at | 1     | 0.14 | 0.37 | 0.38 | 0.16 | 1.17 | 1.27 | - |
|           | 0.32       | 0.18       | 0.47  |      |      |      |      |      |      |   |
| GENE1374X | 16342_at   | 16342_at   | 1     | 0.85 | 1.16 | 1.11 | 0.53 | 1.98 | 1.83 | - |
|           | 0.35       | 0.51       | 0.68  |      |      |      |      |      |      |   |
| GENE1210X | 15884_at   | 15884_at   | 1     | 0.52 | 0.56 | 0.47 | 0.19 | 1.23 | 1    | - |
|           | 0.03       | 0.4        | 0.06  |      |      |      |      |      |      |   |
| GENE667X  | 14085_at   | 14085_at   | 1     | 0.42 | 0.55 | 0.28 | 0.27 | 1.17 | 0.68 | - |
|           | 0.36       | 0.23       | 0.34  |      |      |      |      |      |      |   |
| GENE2119X | 18873_at   | 18873_at   | 1     | 0.47 | 0.5  | 0.61 | 0.49 | 1.46 | 0.63 | - |
|           | 0.15       | 0.54       | 0.34  |      |      |      |      |      |      |   |
| GENE104X  | 12262_at   | 12262_at   | 1     | 0.66 | 0.44 | 0.43 | 0.62 | 1.59 | 1.01 | 0 |
|           | 0.79       | 0.31       |       |      |      |      |      |      |      |   |
| GENE1114X | 15577_s_at | 15577_s_at | 1     | 0.24 | 0.38 | 0.37 | 0.18 | 1.13 | 0.52 |   |
|           | 0.09       | 0.63       | 0.08  |      |      |      |      |      |      |   |
| GENE808X  | 14646_s_at | 14646_s_at | 1     | 0.71 | 0.87 | 0.48 | 0.79 | 1.86 | 1.26 |   |
|           | 0.23       | 0.73       | 0.79  |      |      |      |      |      |      |   |
| GENE456X  | 13367_at   | 13367_at   | 1     | 0.37 | 0.77 | 0.66 | 0.85 | 1.74 | 1.23 |   |
|           | 0.35       | 0.67       | 0.65  |      |      |      |      |      |      |   |
| GENE910X  | 15032_at   | 15032_at   | 1     | 0.58 | 0.8  | 0.83 | 0.67 | 1.75 | 1.22 |   |
|           | 0.24       | 0.75       | 0.26  |      |      |      |      |      |      |   |
| GENE1502X | 16668_at   | 16668_at   | 1     | 1    | 1.45 | 1.32 | 1.51 | 2.61 | 1.89 |   |
|           | 0.8        | 1.67       | 1.04  |      |      |      |      |      |      |   |
| GENE593X  | 13863_at   | 13863_at   | 1     | 1.22 | 1.87 | 2.11 | 1.91 | 3.91 | 2.55 |   |
|           | 1.46       | 1.72       | 1.16  |      |      |      |      |      |      |   |
| GENE2257X | 19384_at   | 19384_at   | 1     | 0.49 | 1.03 | 1.18 | 1.24 | 2.09 | 1.45 |   |
|           | 0.57       | 1.16       | 0.51  |      |      |      |      |      |      |   |
| GENE1560X | 16955_at   | 16955_at   | 1     | 0.37 | 0.82 | 0.88 | 0.65 | 1.56 | 1.27 |   |
|           | 0.61       | 0.96       | 0.5   |      |      |      |      |      |      |   |
| GENE1620X | 17114_s_at | 17114_s_at | 1     | 0.45 | 0.65 | 0.68 | 0.55 | 1.6  | 1.11 |   |
|           | 0.49       | 0.8        | 0.45  |      |      |      |      |      |      |   |
| GENE2061X | 18660_at   | 18660_at   | 1     | 1.52 | 1.88 | 1.42 | 1.6  | 3.28 | 0.68 |   |
|           | 1.83       | 2.8        | 0.56  |      |      |      |      |      |      |   |
| GENE1786X | 17818_at   | 17818_at   | 1     | 0.51 | 0.69 | 0.49 | 0.32 | 1.2  | 0.41 |   |
|           | 0.4        | 0.73       | 0.28  |      |      |      |      |      |      |   |
| GENE917X  | 15043_at   | 15043_at   | 1     | 0.42 | 0.53 | 0.53 | 0.46 | 1.18 | 0.76 |   |
|           | 0.66       | 0.69       | 0.04  |      |      |      |      |      |      |   |
| GENE653X  | 14058_at   | 14058_at   | 1     | 0.47 | 0.6  | 0.72 | 0.48 | 1.31 | 0.77 |   |
|           | 0.5        | 0.44       | -0.01 |      |      |      |      |      |      |   |
| GENE462X  | 13408_s_at | 13408_s_at | 1     | 1.23 | 1.5  | 1.72 | 0.74 | 2.1  | 1.61 |   |
|           | 1.12       | 1.72       | -0.26 |      |      |      |      |      |      |   |
| GENE1065X | 15461_at   | 15461_at   | 1     | 0.4  | 0.81 | 0.98 | 0.35 | 1.3  | 0.27 |   |
|           | 0.05       | 0.87       | -0.26 |      |      |      |      |      |      |   |
| GENE52X   | 12128_at   | 12128_at   | 1     | 4.47 | 5.38 | 5.39 | 2.92 | 5    | 3.94 |   |
|           | 1.37       | 2.32       | 2.11  |      |      |      |      |      |      |   |
| GENE1396X | 16412_s_at | 16412_s_at | 1     | 1.45 | 1.87 | 1.64 | 0.68 | 1.51 | 1.6  |   |
|           | 0.18       | 0.72       | 0.81  |      |      |      |      |      |      |   |

|           |            |            |      |      |      |      |         |      |      |   |
|-----------|------------|------------|------|------|------|------|---------|------|------|---|
| GENE116X  | 12305_i_at | 12305_i_at | 1    | 2.48 | 2.23 | 2.15 | 0.66    | 2.23 | 1.47 |   |
|           | 0.65       | 1.23       | 0.83 |      |      |      |         |      |      |   |
| GENE2396X | 19914_at   | 19914_at   | 1    | 1.13 | 1.06 | 1.01 | 0.31    | 1.28 | 0.94 |   |
|           | 0.07       | 0.48       | 0.23 |      |      |      |         |      |      |   |
| GENE28X   | 12062_at   | 12062_at   | 1    | 1.21 | 1.34 | 1.37 | 0.5     | 1.71 | 0.89 |   |
|           | 0.43       | 1.12       | 0.59 |      |      |      |         |      |      |   |
| GENE2471X | 20129_at   | 20129_at   | 1    | 0.96 | 0.79 | 0.79 | 0.28    | 1.15 | 0.73 |   |
|           | 0.22       | 0.65       | 0.56 |      |      |      |         |      |      |   |
| GENE702X  | 14391_at   | 14391_at   | 1    | 0.94 | 1.1  | 0.98 | 0.00699 |      | 0.98 |   |
|           | 0.52       | 0.08       | 0.56 | 0.33 |      |      |         |      |      |   |
| GENE2616X | 20531_at   | 20531_at   | 1    | 0.71 | 0.97 | 1.02 | 0.34    | 0.67 | 0.36 | - |
|           | 0.1        | 0.45       | 0.21 |      |      |      |         |      |      |   |
| GENE2090X | 18720_s_at | 18720_s_at | 1    | 0.81 | 1.45 | 1.98 | 0.3     | 1.94 | 1.14 | - |
|           | 0.27       | 0.74       | 0.21 |      |      |      |         |      |      |   |
| GENE1469X | 16568_s_at | 16568_s_at | 1    | 0.58 | 1.02 | 1.18 | 0.17    | 1.19 | 0.58 |   |
|           | 0.17       | 0.46       | 0.17 |      |      |      |         |      |      |   |
| GENE2009X | 18526_at   | 18526_at   | 1    | 0.67 | 2.26 | 3.67 | 0.67    | 2.53 | 1.84 |   |
|           | 0.48       | 1.8        | 1.72 |      |      |      |         |      |      |   |
| GENE422X  | 13255_i_at | 13255_i_at | 1    | 1.15 | 2.66 | 3.11 | 0.75    | 2.8  | 2.29 | - |
|           | 0.24       | 1.82       | 1.94 |      |      |      |         |      |      |   |
| GENE423X  | 13256_s_at | 13256_s_at | 1    | 0.7  | 2.11 | 2.58 | 0.38    | 2.17 | 1.59 | - |
|           | 0.2        | 1.22       | 1.27 |      |      |      |         |      |      |   |
| GENE2062X | 18662_s_at | 18662_s_at | 1    | 1.32 | 2.76 | 2.91 | 0.7     | 2.63 | 2.27 |   |
|           | 0.58       | 2.18       | 1.69 |      |      |      |         |      |      |   |
| GENE25X   | 12051_at   | 12051_at   | 1    | 0.73 | 2.25 | 2.42 | 0.66    | 1.91 | 1.57 |   |
|           | 0.57       | 1.26       | 1.24 |      |      |      |         |      |      |   |
| GENE2241X | 19345_at   | 19345_at   | 1    | 2    | 3.37 | 3.8  | 0.26    | 2.96 | 2.26 | 0 |
|           | 1.58       | 1.26       |      |      |      |      |         |      |      |   |
| GENE1471X | 16570_s_at | 16570_s_at | 1    | 1.62 | 2.86 | 3.08 | 0.7     | 3.05 | 2.04 |   |
|           | 0.06       | 1.63       | 1.61 |      |      |      |         |      |      |   |
| GENE848X  | 14763_at   | 14763_at   | 1    | 1.18 | 2.62 | 2.62 | 0.32    | 2.47 | 1.93 |   |
|           | 0.09       | 1.68       | 1.32 |      |      |      |         |      |      |   |
| GENE1215X | 15900_at   | 15900_at   | 1    | 0.75 | 1.44 | 1.61 | 0.18    | 1.23 | 1.01 |   |
|           | 0.11       | 0.93       | 0.82 |      |      |      |         |      |      |   |
| GENE2226X | 19220_at   | 19220_at   | 1    | 0.3  | 1.46 | 1.77 | 0.58    | 1.04 | 1.08 | - |
|           | 0.28       | 0.62       | 0.49 |      |      |      |         |      |      |   |
| GENE1435X | 16499_at   | 16499_at   | 1    | 0.38 | 1.17 | 1.38 | 0.19    | 0.69 | 0.91 | - |
|           | 0.14       | 0.78       | 0.44 |      |      |      |         |      |      |   |
| GENE2397X | 19916_at   | 19916_at   | 1    | 0.43 | 1.35 | 1.2  | 0.15    | 1.62 | 1.34 |   |
|           | 0.12       | 0.93       | 0.75 |      |      |      |         |      |      |   |
| GENE1841X | 17967_at   | 17967_at   | 1    | 1.41 | 2.15 | 2.78 | 1.32    | 2.85 | 2.67 |   |
|           | 0.58       | 1.93       | 1.29 |      |      |      |         |      |      |   |
| GENE2288X | 19465_at   | 19465_at   | 1    | 1    | 2.19 | 2.4  | 0.79    | 2.56 | 2.22 |   |
|           | 0.33       | 1.62       | 1.24 |      |      |      |         |      |      |   |
| GENE1066X | 15463_at   | 15463_at   | 1    | 0.76 | 1.34 | 1.39 | 0.59    | 1.52 | 1.16 |   |
|           | 0.29       | 0.72       | 0.54 |      |      |      |         |      |      |   |
| GENE2562X | 20373_at   | 20373_at   | 1    | 1.41 | 2.32 | 2.78 | 0.73    | 2.75 | 2.41 | - |
|           | 0.03       | 1.01       | 0.76 |      |      |      |         |      |      |   |
| GENE1223X | 15919_at   | 15919_at   | 1    | 1.01 | 1.84 | 2.2  | 0.85    | 2.64 | 2.24 | - |
|           | 0.06       | 0.88       | 0.48 |      |      |      |         |      |      |   |
| GENE613X  | 13944_at   | 13944_at   | 1    | 0.75 | 1.34 | 1.46 | 0.39    | 1.34 | 1.4  | - |
|           | 0.06       | 0.65       | 0.69 |      |      |      |         |      |      |   |
| GENE1803X | 17881_at   | 17881_at   | 1    | 0.55 | 1.23 | 1.65 | 0.46    | 1.34 | 1.47 |   |
|           | 0.17       | 0.57       | 0.42 |      |      |      |         |      |      |   |
| GENE1659X | 17341_at   | 17341_at   | 1    | 2.8  | 4.49 | 4.18 | 1.33    | 3.14 | 1.68 |   |
|           | 1.13       | 1.93       | 1.25 |      |      |      |         |      |      |   |



|           |            |            |       |       |       |       |       |       |      |   |
|-----------|------------|------------|-------|-------|-------|-------|-------|-------|------|---|
| GENE1472X | 16571_s_at | 16571_s_at | 1     | 0.64  | 0.83  | 1.12  | 0.42  | 1.47  | 1.82 | - |
|           | 0.96       | 0.36       | 0.47  |       |       |       |       |       |      |   |
| GENE1907X | 18140_at   | 18140_at   | 1     | 0.36  | 0.63  | 0.9   | 0.35  | 0.81  | 1.07 | - |
|           | 0.66       | 0.26       | 0.24  |       |       |       |       |       |      |   |
| GENE90X   | 12229_at   | 12229_at   | 1     | 0.75  | 0.69  | 1.16  | 0.85  | 1.17  | 1.22 | - |
|           | 0.41       | 0.34       | 0.34  |       |       |       |       |       |      |   |
| GENE553X  | 13653_at   | 13653_at   | 1     | 0.39  | 1.17  | 1.63  | 0.32  | 1.43  | 1.53 | - |
|           | 1.34       | 0.44       | 0.54  |       |       |       |       |       |      |   |
| GENE844X  | 14744_at   | 14744_at   | 1     | 0.51  | 1.71  | 2.1   | 0.2   | 1.65  | 1.58 | - |
|           | 1.41       | 0.66       | 0.11  |       |       |       |       |       |      |   |
| GENE322X  | 13022_at   | 13022_at   | 1     | 1.15  | 1.15  | 1.19  | 0.17  | 1.81  | 0.81 |   |
|           | 0.02       | 0.5        | -0.01 |       |       |       |       |       |      |   |
| GENE1189X | 15815_at   | 15815_at   | 1     | 0.56  | 0.75  | 0.62  | 0.24  | 1.05  | 0.46 |   |
|           | 0.02       | 0.1        | -0.17 |       |       |       |       |       |      |   |
| GENE63X   | 12158_at   | 12158_at   | 1     | 0.54  | 0.75  | 1     | 0.4   | 1.5   | 0.81 |   |
|           | 0.11       | -0.03      | -0.1  |       |       |       |       |       |      |   |
| GENE2517X | 20246_s_at | 20246_s_at | 1     | 1.05  | 1.25  | 1.4   | 0.4   | 1.5   | 1.45 | - |
|           | 0.28       | 0.14       | 0.17  |       |       |       |       |       |      |   |
| GENE2220X | 19207_at   | 19207_at   | 1     | 1.35  | 1.33  | 1.26  | 0.48  | 1.58  | 1.65 | - |
|           | 0.47       | 0.04       | 0.03  |       |       |       |       |       |      |   |
| GENE1566X | 16972_at   | 16972_at   | 1     | 1.38  | 1.36  | 1.48  | 0.52  | 1.49  | 1.35 | - |
|           | 0.44       | 0.1        | -0.09 |       |       |       |       |       |      |   |
| GENE991X  | 15176_s_at | 15176_s_at | 1     | 0.89  | 1.33  | 1.61  | 0.82  | 1.51  | 1.23 | - |
|           | 0.41       | -0.1       | -0.19 |       |       |       |       |       |      |   |
| GENE1912X | 18174_at   | 18174_at   | 1     | 0.66  | 1     | 0.91  | 0.93  | 1.17  | 1.23 | - |
|           | 0.46       | 0.3        | -0.54 |       |       |       |       |       |      |   |
| GENE212X  | 12627_at   | 12627_at   | 1     | 0.48  | 0.54  | 0.42  | 0.14  | 1.05  | 0.29 | - |
|           | 0.63       | 0.02       | -0.07 |       |       |       |       |       |      |   |
| GENE1047X | 15403_s_at | 15403_s_at | 1     | 0.9   | 0.72  | 1.02  | 0.09  | 1.55  | 0.84 | - |
|           | 0.96       | -0.29      | -0.51 |       |       |       |       |       |      |   |
| GENE1302X | 16108_s_at | 16108_s_at | 1     | -0.51 | -0.64 | -0.07 | -0.13 | -0.13 | 0.99 | - |
|           | 0.3        | 0.26       | 1.46  |       |       |       |       |       |      |   |
| GENE1660X | 17349_g_at | 17349_g_at | 1     | -1.13 | 0     | -0.75 | 0.14  | -0.24 | 1.48 | - |
|           | 0.9        | 0.61       | 1     |       |       |       |       |       |      |   |
| GENE125X  | 12325_at   | 12325_at   | 1     | 0.29  | 0.38  | 0.62  | -0.29 | 0.64  | 2.28 | - |
|           | 1.15       | 1.37       | 2.29  |       |       |       |       |       |      |   |
| GENE2611X | 20519_at   | 20519_at   | 1     | 0     | -0.37 | -0.37 | 0     | 1.28  | 3    | - |
|           | 0.77       | 0.5        | 1.59  |       |       |       |       |       |      |   |
| GENE1801X | 17877_g_at | 17877_g_at | 1     | -0.27 | -0.31 | 0.54  | 0.02  | 0.49  | 1.51 | - |
|           | 0.54       | 0          | 0.61  |       |       |       |       |       |      |   |
| GENE1800X | 17876_at   | 17876_at   | 1     | -0.15 | -0.23 | 0.49  | -0.22 | 0.3   | 1.09 | - |
|           | 0.72       | -0.09      | 0.35  |       |       |       |       |       |      |   |
| GENE146X  | 12408_at   | 12408_at   | 1     | 0.3   | 0.16  | 0.13  | -0.3  | 0.68  | 1.25 | - |
|           | 0.65       | -0.6       | 0.17  |       |       |       |       |       |      |   |
| GENE623X  | 13980_s_at | 13980_s_at | 1     | 0.1   | 0.21  | 0     | -0.34 | 0.05  | 1.05 | - |
|           | 1.37       | -0.84      | -0.34 |       |       |       |       |       |      |   |
| GENE1607X | 17089_s_at | 17089_s_at | 1     | 0.88  | 1.05  | 0.82  | 0.38  | -0.41 | 0.87 | - |
|           | 0.56       | 0.1        | 1.34  |       |       |       |       |       |      |   |
| GENE1720X | 17508_at   | 17508_at   | 1     | 0.36  | 0.6   | 1.04  | -0.21 | -0.23 | 0.72 | - |
|           | 0.54       | 0.06       | 1.28  |       |       |       |       |       |      |   |
| GENE334X  | 13067_s_at | 13067_s_at | 1     | 0.22  | 0.13  | 0.09  | -0.01 | -0.27 | 0.09 | - |
|           | 0.26       | 0.08       | 1.15  |       |       |       |       |       |      |   |
| GENE663X  | 14077_at   | 14077_at   | 1     | -0.43 | 1.09  | 1.12  | -2.46 | -1.31 | 0.45 | - |
|           | 1.83       | 0.04       | 1.23  |       |       |       |       |       |      |   |
| GENE1363X | 16311_at   | 16311_at   | 1     | 0.05  | 0.42  | 0.08  | -1    | -0.36 | 0.07 | - |
|           | 0.63       | 0.33       | 1.04  |       |       |       |       |       |      |   |



|           |            |            |       |       |       |       |       |       |       |   |
|-----------|------------|------------|-------|-------|-------|-------|-------|-------|-------|---|
| GENE1489X | 16620_s_at | 16620_s_at | 1     | -0.03 | 2.24  | 2.56  | -1.86 | -0.32 | 0.81  |   |
|           | 0.28       | 0.91       | 2.66  |       |       |       |       |       |       |   |
| GENE1965X | 18300_at   | 18300_at   | 1     | 0.41  | 0.98  | 1.85  | -1.23 | -0.09 | 0.14  | - |
|           | 0.39       | 0.71       | 1.56  |       |       |       |       |       |       |   |
| GENE1453X | 16536_at   | 16536_at   | 1     | 1.63  | 4.31  | 4.56  | -1.1  | -0.38 | 1.9   | - |
|           | 1.37       | 1.25       | 2.85  |       |       |       |       |       |       |   |
| GENE2646X | 20620_g_at | 20620_g_at | 1     | 1.29  | 3.77  | 3.91  | -0.77 | 0.58  | 1.8   |   |
|           | 0.19       | 1.51       | 2.32  |       |       |       |       |       |       |   |
| GENE345X  | 13102_at   | 13102_at   | 1     | 0.39  | 1.02  | 1.03  | -0.26 | 0.38  | 0.69  | - |
|           | 0.05       | 0.41       | 0.87  |       |       |       |       |       |       |   |
| GENE2550X | 20335_s_at | 20335_s_at | 1     | 0.25  | 2.73  | 2.53  | -1.05 | -0.64 | -0.25 | - |
|           | 0.25       | 0.71       | 1.08  |       |       |       |       |       |       |   |
| GENE2645X | 20619_at   | 20619_at   | 1     | 0.97  | 2.99  | 3.06  | -1.42 | -0.48 | 0.59  | - |
|           | 0.3        | 0          | 0.85  |       |       |       |       |       |       |   |
| GENE2374X | 19869_at   | 19869_at   | 1     | 0.04  | 0.75  | 1.39  | -0.29 | 0.1   | 1.33  | - |
|           | 1.58       | 0          | 0.76  |       |       |       |       |       |       |   |
| GENE1696X | 17442_i_at | 17442_i_at | 1     | 0.89  | 1.49  | 1.65  | -0.39 | 0.56  | 1.45  | - |
|           | 1.28       | 0.12       | 0.77  |       |       |       |       |       |       |   |
| GENE1695X | 17441_s_at | 17441_s_at | 1     | 0.64  | 1.21  | 1.37  | -0.39 | 0.56  | 1.45  | - |
|           | 1.33       | -0.00759   | 0.64  |       |       |       |       |       |       |   |
| GENE692X  | 14310_at   | 14310_at   | 1     | 0.68  | 1.22  | 1.62  | -1.08 | 0.61  | 0.86  | - |
|           | 2.1        | 0.32       | 0.66  |       |       |       |       |       |       |   |
| GENE1537X | 16893_at   | 16893_at   | 1     | 0.51  | 1.06  | 1.28  | -0.5  | -0.27 | 0.97  | - |
|           | 0.3        | -0.37      | 0.23  |       |       |       |       |       |       |   |
| GENE346X  | 13103_at   | 13103_at   | 1     | 0.62  | 0.3   | -0.15 | 1.03  | -2.16 | -0.55 | - |
|           | 0.46       | -0.89      | -0.38 |       |       |       |       |       |       |   |
| GENE2215X | 19195_at   | 19195_at   | 1     | 1.95  | 1.74  | 1.19  | 0.21  | -2.32 | -1.18 | - |
|           | 0.36       | -1.84      | -0.26 |       |       |       |       |       |       |   |
| GENE1430X | 16488_at   | 16488_at   | 1     | 1.13  | 1.04  | 0.87  | -0.07 | -1.4  | -0.64 | - |
|           | 0.68       | -1.43      | -0.51 |       |       |       |       |       |       |   |
| GENE1243X | 15989_at   | 15989_at   | 1     | 0.06  | -0.06 | -0.3  | 0.32  | -1.06 | -0.09 |   |
|           | 0.38       | -1.12      | -0.36 |       |       |       |       |       |       |   |
| GENE2591X | 20456_at   | 20456_at   | 1     | 0.4   | -0.15 | -0.61 | 0.9   | -0.73 | -0.36 |   |
|           | 0.09       | -1.1       | -0.79 |       |       |       |       |       |       |   |
| GENE74X   | 12186_at   | 12186_at   | 1     | 0.32  | -0.19 | -0.29 | 0.57  | -0.45 | -0.3  |   |
|           | 0.29       | -1.24      | -0.83 |       |       |       |       |       |       |   |
| GENE1362X | 16310_at   | 16310_at   | 1     | 0.19  | 0.01  | -0.07 | 1.22  | -0.71 | 0.07  | 1 |
|           | -0.86      | -0.3       |       |       |       |       |       |       |       |   |
| GENE326X  | 13026_at   | 13026_at   | 1     | 0.52  | 0.72  | 0.62  | 1.32  | -0.79 | -0.03 |   |
|           | 1.28       | -1.02      | -0.44 |       |       |       |       |       |       |   |
| GENE1760X | 17600_s_at | 17600_s_at | 1     | -0.14 | 0.03  | 0.27  | 0.85  | -0.92 | -0.09 |   |
|           | 0.8        | -0.92      | -1.01 |       |       |       |       |       |       |   |
| GENE1990X | 18411_at   | 18411_at   | 1     | -0.2  | -0.5  | -0.04 | 0.59  | 1.13  | 0.93  |   |
|           | 0.06       | -0.5       | -0.72 |       |       |       |       |       |       |   |
| GENE137X  | 12359_s_at | 12359_s_at | 1     | -0.05 | -0.21 | -0.07 | 0.72  | 1     | 1.06  | - |
|           | 0.7        | -0.8       | -1.04 |       |       |       |       |       |       |   |
| GENE2065X | 18665_r_at | 18665_r_at | 1     | 0.31  | 0.15  | -0.03 | 1.37  | 0.98  | 0.52  | - |
|           | 0.04       | -0.66      | -1.68 |       |       |       |       |       |       |   |
| GENE1635X | 17204_at   | 17204_at   | 1     | -0.33 | -0.3  | -0.24 | 0.66  | 0.57  | 0.23  | 0 |
|           | -0.02      | -1.27      |       |       |       |       |       |       |       |   |
| GENE2634X | 20585_at   | 20585_at   | 1     | -1.02 | -0.57 | -0.59 | 2.45  | 1.41  | 1.27  |   |
|           | 0.69       | -1.55      | -4.03 |       |       |       |       |       |       |   |
| GENE1984X | 18351_at   | 18351_at   | 1     | 0.1   | 0.18  | -0.08 | 1.57  | 0.78  | 1.12  |   |
|           | 0.78       | -0.92      | -0.8  |       |       |       |       |       |       |   |
| GENE1205X | 15868_at   | 15868_at   | 1     | 0.6   | 0.1   | -0.08 | 1.19  | 0.42  | 0.04  |   |
|           | 1.16       | -0.51      | -0.9  |       |       |       |       |       |       |   |

|           |            |             |   |       |       |       |       |       |         |
|-----------|------------|-------------|---|-------|-------|-------|-------|-------|---------|
| GENE1174X | 15750_at   | 15750_at    | 1 | -0.37 | -1.13 | -1.06 | 1.52  | -0.65 | 0.03    |
|           | 1.21       | -0.59 -0.67 |   |       |       |       |       |       |         |
| GENE2251X | 19373_at   | 19373_at    | 1 | -0.06 | -0.93 | -1.13 | 1.85  | -0.4  | -0.01   |
|           | 1.87       | -0.86 -1.03 |   |       |       |       |       |       |         |
| GENE1467X | 16565_at   | 16565_at    | 1 | 0     | -0.9  | -1.18 | 1.2   | -0.28 | -0.64   |
|           | 1.69       | -0.86 -1.56 |   |       |       |       |       |       |         |
| GENE314X  | 13003_at   | 13003_at    | 1 | -0.33 | -0.93 | -1.1  | 0.88  | 0.58  | -0.09   |
|           | 0.39       | -0.35 -0.71 |   |       |       |       |       |       |         |
| GENE1917X | 18197_at   | 18197_at    | 1 | -0.5  | -0.84 | -1.62 | 1.6   | 0.2   | -0.07   |
|           | 0.67       | -0.45 -1.04 |   |       |       |       |       |       |         |
| GENE1501X | 16660_at   | 16660_at    | 1 | -1.13 | 0.71  | 0.44  | 3.42  | -0.38 | -0.62 - |
|           | 0.89       | -0.24 -0.37 |   |       |       |       |       |       |         |
| GENE2564X | 20382_s_at | 20382_s_at  | 1 | 0.47  | 1.07  | 1.17  | -0.31 | 0.82  | 0.57 -  |
|           | 0.36       | 0.04 0.4    |   |       |       |       |       |       |         |
| GENE1763X | 17627_at   | 17627_at    | 1 | 0.26  | 1.06  | 1.08  | -0.63 | 0.64  | 0.49 -  |
|           | 0.42       | 0.39 0.12   |   |       |       |       |       |       |         |
| GENE1033X | 15367_at   | 15367_at    | 1 | 0.65  | 1     | 1.75  | -0.35 | 1.47  | 0.72 -  |
|           | 0.76       | 0.25 -0.43  |   |       |       |       |       |       |         |
| GENE2238X | 19268_at   | 19268_at    | 1 | 3.92  | 4.27  | 3.94  | 0.63  | 1.95  | 2.25 0  |
|           | 0.84       | 1.48        |   |       |       |       |       |       |         |
| GENE2331X | 19664_at   | 19664_at    | 1 | 1.77  | 2.35  | 2.65  | 0.16  | 0.94  | 1.48 -  |
|           | 0.18       | 0 0.78      |   |       |       |       |       |       |         |
| GENE618X  | 13963_at   | 13963_at    | 1 | 2.53  | 3.17  | 3.26  | 1.11  | 1.97  | 2.11    |
|           | 0.26       | 1.08 0.78   |   |       |       |       |       |       |         |
| GENE533X  | 13617_at   | 13617_at    | 1 | 1.79  | 2.71  | 3.24  | 0.74  | 1.48  | 1.96 -  |
|           | 0.16       | 0.47 0.76   |   |       |       |       |       |       |         |
| GENE304X  | 12958_at   | 12958_at    | 1 | 1.34  | 1.75  | 2.51  | 0.06  | 1.28  | 1.14    |
|           | 0.22       | 0.74 0.42   |   |       |       |       |       |       |         |
| GENE1526X | 16791_at   | 16791_at    | 1 | 2.62  | 2.32  | 3.36  | 0.96  | 1.63  | 1.42    |
|           | 0.11       | 0.58 0.8    |   |       |       |       |       |       |         |
| GENE1372X | 16336_at   | 16336_at    | 1 | 1.24  | 1.27  | 1.42  | 0.54  | 0.84  | 0.54 -  |
|           | 0.17       | 0.05 0.29   |   |       |       |       |       |       |         |
| GENE2553X | 20345_at   | 20345_at    | 1 | 2.21  | 2.18  | 1.98  | 1.05  | 1.39  | 1.46    |
|           | 0.08       | -0.01 0.47  |   |       |       |       |       |       |         |
| GENE2512X | 20235_i_at | 20235_i_at  | 1 | 2.23  | 2.88  | 2.85  | 0.38  | 1.68  | 1.17 -  |
|           | 0.08       | 0.15 0.75   |   |       |       |       |       |       |         |
| GENE1393X | 16393_s_at | 16393_s_at  | 1 | 1.25  | 1.84  | 1.99  | 0.46  | 1.27  | 0.86 -  |
|           | 0.02       | 0.08 0.41   |   |       |       |       |       |       |         |
| GENE546X  | 13641_at   | 13641_at    | 1 | 1.04  | 1.72  | 1.38  | 0.47  | 0.93  | 0.62    |
|           | 0.21       | 0.29 0.43   |   |       |       |       |       |       |         |
| GENE107X  | 12278_at   | 12278_at    | 1 | 2     | 2.92  | 3.52  | 0.54  | 2.18  | 2.96 -  |
|           | 2.28       | 0 1.01      |   |       |       |       |       |       |         |
| GENE1297X | 16088_f_at | 16088_f_at  | 1 | 0.94  | 1.61  | 1.73  | 0.46  | 0.96  | 0.76 -  |
|           | 0.98       | -0.4 0.42   |   |       |       |       |       |       |         |
| GENE126X  | 12335_at   | 12335_at    | 1 | 0.47  | 1.43  | 1.87  | 0.37  | 0.86  | 1.1 -   |
|           | 0.32       | -0.15 0     |   |       |       |       |       |       |         |
| GENE122X  | 12315_at   | 12315_at    | 1 | 0.45  | 1.07  | 1.13  | 0.07  | 0.73  | 0.57 -  |
|           | 0.53       | -0.11 -0.2  |   |       |       |       |       |       |         |
| GENE1664X | 17368_at   | 17368_at    | 1 | 0.53  | 1.15  | 1.07  | 0     | 1.2   | 0.47    |
|           | 0.08       | -0.49 0.02  |   |       |       |       |       |       |         |
| GENE297X  | 12943_at   | 12943_at    | 1 | 2.77  | 3.5   | 3.54  | -0.34 | 1.79  | 1.68 -  |
|           | 0.52       | -0.18 -0.12 |   |       |       |       |       |       |         |
| GENE707X  | 14408_at   | 14408_at    | 1 | 1.91  | 2.58  | 2.86  | 0.53  | 2.37  | 1.45 -  |
|           | 0.26       | 0.3 -1      |   |       |       |       |       |       |         |
| GENE1316X | 16134_at   | 16134_at    | 1 | 0.48  | 1.73  | 2.02  | -0.29 | 0.44  | 0.82 -  |
|           | 0.32       | 0.53 0.47   |   |       |       |       |       |       |         |

|           |            |            |       |      |      |      |       |       |          |   |
|-----------|------------|------------|-------|------|------|------|-------|-------|----------|---|
| GENE1669X | 17381_at   | 17381_at   | 1     | 0.45 | 1.75 | 2.07 | -0.16 | 0.44  | 0.27     |   |
|           | 0.02       | 0.5        | 0.15  |      |      |      |       |       |          |   |
| GENE428X  | 13270_at   | 13270_at   | 1     | 1.07 | 2.12 | 2.58 | -0.38 | 0.71  | 0.35     | - |
|           | 0.09       | 0.48       | 0.13  |      |      |      |       |       |          |   |
| GENE429X  | 13271_g_at | 13271_g_at | 1     | 0.9  | 2.17 | 2.68 | -0.29 | 0.88  | 0.59     | - |
|           | 0.26       | 0.47       | 0.13  |      |      |      |       |       |          |   |
| GENE1456X | 16539_s_at | 16539_s_at | 1     | 0.75 | 2.75 | 3.21 | 0.64  | 0.11  | 0.87     |   |
|           | 0.44       | -0.06      | 0.49  |      |      |      |       |       |          |   |
| GENE2037X | 18600_at   | 18600_at   | 1     | 1.05 | 2.55 | 2.71 | 0.1   | 0.37  | 0.17     | - |
|           | 0.00998    | -0.3       | -0.35 |      |      |      |       |       |          |   |
| GENE974X  | 15143_s_at | 15143_s_at | 1     | 0.55 | 1.45 | 1.36 | -0.06 | 0.64  | -0.00711 |   |
|           | -0.13      | 0.25       | -0.16 |      |      |      |       |       |          |   |
| GENE791X  | 14608_at   | 14608_at   | 1     | 0.84 | 1.95 | 2.11 | -0.11 | 0.64  | -0.02    | - |
|           | 0.44       | 0.05       | -0.19 |      |      |      |       |       |          |   |
| GENE1281X | 16060_at   | 16060_at   | 1     | 0.56 | 1.33 | 1.18 | 0.24  | 0.55  | 0.18     | - |
|           | 0.55       | -0.07      | -0.1  |      |      |      |       |       |          |   |
| GENE1998X | 18445_at   | 18445_at   | 1     | 0.12 | 1.29 | 0.54 | 0.32  | 1.02  | 0.17     |   |
|           | 0.18       | 0.23       | -0.8  |      |      |      |       |       |          |   |
| GENE131X  | 12345_at   | 12345_at   | 1     | 1.64 | 1.36 | 1.2  | 0.53  | 0.42  | 0.47     |   |
|           | 0.6        | 0.47       | -2.01 |      |      |      |       |       |          |   |
| GENE2021X | 18567_at   | 18567_at   | 1     | 1.6  | 2.01 | 1.62 | -0.2  | 1.88  | -0.29    |   |
|           | 0.14       | 0.84       | -0.2  |      |      |      |       |       |          |   |
| GENE267X  | 12805_s_at | 12805_s_at | 1     | 1.26 | 1.31 | 0.89 | -0.17 | 1.09  | -0.59    | - |
|           | 0.58       | 0.42       | -0.59 |      |      |      |       |       |          |   |
| GENE558X  | 13660_i_at | 13660_i_at | 1     | 0.97 | 1.14 | 1.07 | -0.73 | -0.9  | -0.58    |   |
|           | 0.77       | -0.48      | -0.48 |      |      |      |       |       |          |   |
| GENE914X  | 15039_at   | 15039_at   | 1     | 0.07 | 1.43 | 1.48 | -0.26 | -0.65 | -1.07    |   |
|           | 0.24       | -0.23      | -0.53 |      |      |      |       |       |          |   |
| GENE581X  | 13806_at   | 13806_at   | 1     | 0.75 | 1.48 | 1.6  | 0.24  | -0.66 | -0.8     | - |
|           | 0.1        | -1.05      | -1.56 |      |      |      |       |       |          |   |
| GENE1806X | 17886_at   | 17886_at   | 1     | 0.47 | 2.56 | 2.55 | 0.06  | -0.37 | -1.24    | - |
|           | 0.98       | -1.36      | -2.51 |      |      |      |       |       |          |   |
| GENE118X  | 12308_at   | 12308_at   | 1     | 0.97 | 1.18 | 0.95 | -0.8  | 0.15  | 0.05     | - |
|           | 0.35       | 0.47       | -0.03 |      |      |      |       |       |          |   |
| GENE761X  | 14529_at   | 14529_at   | 1     | 0.61 | 1.9  | 2.39 | -0.55 | 0     | 0.14     | - |
|           | 0.66       | 0.39       | 0.22  |      |      |      |       |       |          |   |
| GENE1168X | 15683_s_at | 15683_s_at | 1     | 0.46 | 1.09 | 1.56 | -0.61 | 0.02  | -0.15    | - |
|           | 0.65       | -0.13      | -0.05 |      |      |      |       |       |          |   |
| GENE1911X | 18167_s_at | 18167_s_at | 1     | 0.06 | 1.85 | 2    | -0.97 | 0.37  | 0.13     | - |
|           | 0.5        | -0.04      | -0.56 |      |      |      |       |       |          |   |
| GENE241X  | 12759_at   | 12759_at   | 1     | 0.56 | 1.31 | 1.61 | -0.65 | -0.62 | 0.09     | - |
|           | 0.94       | 0.33       | -0.84 |      |      |      |       |       |          |   |
| GENE936X  | 15085_at   | 15085_at   | 1     | 1.86 | 2.21 | 2.47 | -0.33 | 0.19  | 0.71     | - |
|           | 0.69       | -0.14      | 0.5   |      |      |      |       |       |          |   |
| GENE442X  | 13296_at   | 13296_at   | 1     | 0.78 | 0.98 | 1.24 | -0.34 | 0.21  | 0.16     | - |
|           | 0.53       | -0.2       | -0.13 |      |      |      |       |       |          |   |
| GENE717X  | 14431_at   | 14431_at   | 1     | 1.8  | 2.36 | 2.66 | 0.03  | 0.25  | 0.85     | - |
|           | 1.16       | -0.94      | -0.24 |      |      |      |       |       |          |   |
| GENE173X  | 12497_at   | 12497_at   | 1     | 1.43 | 1.82 | 2.08 | -0.02 | 0.32  | 0.21     | - |
|           | 0.69       | -0.57      | -0.33 |      |      |      |       |       |          |   |
| GENE2560X | 20369_s_at | 20369_s_at | 1     | 1.18 | 1.4  | 1.15 | -0.34 | 0.05  | -0.3     | - |
|           | 0.32       | -0.36      | -0.04 |      |      |      |       |       |          |   |
| GENE135X  | 12353_at   | 12353_at   | 1     | 1.48 | 1.36 | 1.2  | 0.05  | 0.41  | 0.02     | - |
|           | 0.12       | -0.58      | -0.41 |      |      |      |       |       |          |   |
| GENE136X  | 12354_g_at | 12354_g_at | 1     | 1.42 | 1.31 | 1.08 | 0.05  | 0.45  | -0.07    | - |
|           | 0.13       | -0.65      | -0.61 |      |      |      |       |       |          |   |

|           |            |            |       |      |      |      |       |       |          |    |
|-----------|------------|------------|-------|------|------|------|-------|-------|----------|----|
| GENE111X  | 12293_at   | 12293_at   | 1     | 0.55 | 1    | 0.95 | -0.35 | 0.24  | 0.54     | -  |
|           | 0.67       | -0.67      | 0.03  |      |      |      |       |       |          |    |
| GENE794X  | 14612_at   | 14612_at   | 1     | 1.79 | 2.22 | 2.93 | 0.37  | -0.33 | 1.64     | -  |
|           | 1.71       | -2.23      | 0.47  |      |      |      |       |       |          |    |
| GENE2237X | 19267_s_at | 19267_s_at | 1     | 2.44 | 2.66 | 3.06 | 1.13  | 0.13  | 1.92     | -  |
|           | 1.94       | -2.38      | -0.11 |      |      |      |       |       |          |    |
| GENE1845X | 17990_at   | 17990_at   | 1     | 0.92 | 1.2  | 1.96 | 0.16  | -0.18 | 0.44     | -  |
|           | 1.34       | -0.8       | -0.25 |      |      |      |       |       |          |    |
| GENE101X  | 12249_s_at | 12249_s_at | 1     | 1.04 | 1.14 | 1.43 | -0.53 | -0.14 | 0.53     | -  |
|           | 1.38       | -0.81      | -0.29 |      |      |      |       |       |          |    |
| GENE486X  | 13538_at   | 13538_at   | 1     | 1.3  | 1.83 | 1.79 | -0.56 | 0.02  | 0.26     | -  |
|           | 1.96       | -1.11      | -0.66 |      |      |      |       |       |          |    |
| GENE598X  | 13900_s_at | 13900_s_at | 1     | 1.44 | 1.85 | 1.41 | 0.14  | -0.26 | 0.81     | -  |
|           | 2.07       | -1.05      | -0.24 |      |      |      |       |       |          |    |
| GENE801X  | 14631_s_at | 14631_s_at | 1     | 1.36 | 1.75 | 1.42 | 0.43  | -0.13 | 0.85     | -2 |
|           | -1.01      | -0.64      |       |      |      |      |       |       |          |    |
| GENE487X  | 13539_i_at | 13539_i_at | 1     | 1.44 | 1.81 | 1.29 | -0.06 | -0.81 | 0.48     | -  |
|           | 1.63       | -1.16      | -0.63 |      |      |      |       |       |          |    |
| GENE537X  | 13625_s_at | 13625_s_at | 1     | 0.77 | 1.21 | 1.47 | -0.26 | -0.07 | -0.34    | -  |
|           | 0.59       | -0.49      | -0.46 |      |      |      |       |       |          |    |
| GENE1291X | 16077_s_at | 16077_s_at | 1     | 0.79 | 1.51 | 1.9  | -0.68 | -0.05 | -0.00978 |    |
|           | -1.17      | -0.76      | -0.61 |      |      |      |       |       |          |    |
| GENE1749X | 17579_s_at | 17579_s_at | 1     | 1.13 | 1.82 | 2.17 | -0.63 | -0.16 | 0.00975  |    |
|           | -1.28      | -0.79      | -0.73 |      |      |      |       |       |          |    |
| GENE2160X | 18967_s_at | 18967_s_at | 1     | 1.36 | 1.51 | 1.99 | -0.21 | -0.53 | 0.03     | -  |
|           | 1.59       | -0.94      | -0.56 |      |      |      |       |       |          |    |
| GENE1846X | 17991_g_at | 17991_g_at | 1     | 1.08 | 1.31 | 1.81 | -0.3  | -0.59 | -0.08    | -  |
|           | 1.74       | -1.29      | -0.63 |      |      |      |       |       |          |    |
| GENE265X  | 12801_at   | 12801_at   | 1     | 1.02 | 1.68 | 2.03 | -0.9  | -0.39 | -0.15    | -  |
|           | 2.23       | -1.26      | -1.19 |      |      |      |       |       |          |    |
| GENE1324X | 16151_at   | 16151_at   | 1     | 0.37 | 0.97 | 1.07 | 0.1   | -0.05 | -0.49    | -  |
|           | 1.05       | -0.9       | -0.94 |      |      |      |       |       |          |    |
| GENE847X  | 14751_at   | 14751_at   | 1     | 1.51 | 1.44 | 1.37 | 0.28  | -0.13 | 0.4      | -  |
|           | 1.42       | -1.13      | -1.16 |      |      |      |       |       |          |    |
| GENE1523X | 16761_at   | 16761_at   | 1     | 1.62 | 1.41 | 1.73 | -0.47 | -0.03 | 0        | -  |
|           | 1.29       | -1.58      | -1.29 |      |      |      |       |       |          |    |
| GENE1282X | 16061_s_at | 16061_s_at | 1     | 0.27 | 1.02 | 1    | -0.35 | 0.66  | 0.15     | -  |
|           | 0.73       | -0.71      | -0.82 |      |      |      |       |       |          |    |
| GENE731X  | 14472_at   | 14472_at   | 1     | 0.84 | 1.07 | 0.86 | 0.78  | -0.09 | 0.2      |    |
|           | 0.45       | -1.13      | -0.54 |      |      |      |       |       |          |    |
| GENE1636X | 17207_at   | 17207_at   | 1     | 1.58 | 1.64 | 1.27 | 1.55  | -0.13 | 0.96     | -  |
|           | 0.26       | -1.74      | -0.71 |      |      |      |       |       |          |    |
| GENE890X  | 14964_at   | 14964_at   | 1     | 2.19 | 1.9  | 2.04 | 1.11  | -0.01 | 0.08     | -  |
|           | 0.48       | -2.32      | -0.98 |      |      |      |       |       |          |    |
| GENE2102X | 18751_f_at | 18751_f_at | 1     | 3.14 | 3.62 | 3.17 | 2.32  | 1.67  | 2.13     | -  |
|           | 1.78       | -1.54      | -2.24 |      |      |      |       |       |          |    |
| GENE114X  | 12299_at   | 12299_at   | 1     | 1    | 0.73 | 0.33 | 0.45  | 0.04  | -0.66    |    |
|           | 0.07       | -0.81      | -0.07 |      |      |      |       |       |          |    |
| GENE2638X | 20608_s_at | 20608_s_at | 1     | 2.23 | 1.87 | 1.18 | 0.53  | -0.84 | -0.84    |    |
|           | 0.51       | -0.48      | -0.48 |      |      |      |       |       |          |    |
| GENE232X  | 12739_s_at | 12739_s_at | 1     | 0.88 | 1.28 | 0.62 | -0.06 | -0.02 | -0.25    |    |
|           | 0.44       | -0.42      | -1.22 |      |      |      |       |       |          |    |
| GENE300X  | 12949_at   | 12949_at   | 1     | 1.19 | 1.27 | 0.93 | 0.28  | -0.23 | -0.56    | -  |
|           | 0.36       | -0.46      | -1.02 |      |      |      |       |       |          |    |
| GENE1383X | 16365_at   | 16365_at   | 1     | 4.45 | 3.86 | 4.05 | 1.27  | 0.18  | -1.71    | -  |
|           | 0.58       | -2.02      | -5.24 |      |      |      |       |       |          |    |



|           |            |            |       |       |       |       |       |       |       |   |
|-----------|------------|------------|-------|-------|-------|-------|-------|-------|-------|---|
| GENE1875X | 18048_at   | 18048_at   | 1     | 0.73  | 0.5   | 0.52  | -0.19 | -0.46 | -0.35 | - |
|           | 1.12       | -0.85      | -0.51 |       |       |       |       |       |       |   |
| GENE464X  | 13432_at   | 13432_at   | 1     | 1.3   | 0.91  | 0.39  | -0.24 | -0.29 | -0.78 | - |
|           | 1.09       | -1.42      | -0.83 |       |       |       |       |       |       |   |
| GENE2461X | 20089_at   | 20089_at   | 1     | 1.22  | 0.87  | 0.62  | 0.5   | -0.7  | -0.36 | - |
|           | 0.78       | -1.33      | -0.84 |       |       |       |       |       |       |   |
| GENE1439X | 16504_at   | 16504_at   | 1     | -0.01 | 0.22  | 0.17  | -0.14 | -0.46 | 0.18  | - |
|           | 1.22       | -1.35      | -0.43 |       |       |       |       |       |       |   |
| GENE46X   | 12118_at   | 12118_at   | 1     | 0.47  | 0.96  | 0.62  | -0.43 | -1.01 | 0.24  | - |
|           | 2.39       | -2.95      | -1.56 |       |       |       |       |       |       |   |
| GENE1336X | 16204_at   | 16204_at   | 1     | 0.2   | 0.16  | 0.31  | -0.29 | 0.2   | 0.43  | - |
|           | 1.16       | -0.96      | -0.64 |       |       |       |       |       |       |   |
| GENE61X   | 12153_at   | 12153_at   | 1     | 0.19  | 0.05  | 0     | -0.25 | 0.17  | 0.04  | - |
|           | 1.06       | -1.14      | -0.8  |       |       |       |       |       |       |   |
| GENE379X  | 13156_f_at | 13156_f_at | 1     | 0.66  | -0.46 | 0.46  | -0.19 | 0.25  | 0.21  | - |
|           | 2.27       | -2.23      | -2.08 |       |       |       |       |       |       |   |
| GENE2283X | 19458_at   | 19458_at   | 1     | 0.6   | 0.33  | 0.23  | 0.73  | 0.03  | 0.61  | - |
|           | 1.07       | -0.83      | -0.24 |       |       |       |       |       |       |   |
| GENE2305X | 19577_at   | 19577_at   | 1     | 1.2   | 0.99  | 1.03  | 1.41  | 0.41  | 2     | - |
|           | 2.48       | -2.48      | -1.48 |       |       |       |       |       |       |   |
| GENE1547X | 16909_at   | 16909_at   | 1     | 0.87  | 0.92  | 1.03  | 0.51  | 1.05  | 1.19  | - |
|           | 1.48       | -1.8       | -0.93 |       |       |       |       |       |       |   |
| GENE1143X | 15638_s_at | 15638_s_at | 1     | 1     | 1.5   | 0.91  | 1.41  | 1.11  | 1.32  | - |
|           | 1.32       | -1.58      | -1.44 |       |       |       |       |       |       |   |
| GENE5X    | 11998_at   | 11998_at   | 1     | 0.86  | 1.11  | 1.02  | 0.83  | -0.31 | 1.06  | - |
|           | 1.01       | -1.87      | -1.55 |       |       |       |       |       |       |   |
| GENE1458X | 16541_s_at | 16541_s_at | 1     | 0.27  | 0.09  | 0.33  | 0.02  | -0.07 | 0.84  | - |
|           | 0.88       | -1.09      | -0.94 |       |       |       |       |       |       |   |
| GENE2650X | 20635_s_at | 20635_s_at | 1     | 0.47  | 0.5   | 0.3   | 0.12  | -0.28 | 0     | - |
|           | 0.05       | -1.1       | -0.8  |       |       |       |       |       |       |   |
| GENE1914X | 18187_at   | 18187_at   | 1     | 0.28  | 0.15  | -0.03 | 0.27  | 0.11  | 0.37  | - |
|           | 0.49       | -1.18      | -0.83 |       |       |       |       |       |       |   |
| GENE130X  | 12344_at   | 12344_at   | 1     | 0.49  | 0.19  | -0.25 | 0.52  | -0.2  | 0.03  | - |
|           | 0.26       | -1.34      | -0.85 |       |       |       |       |       |       |   |
| GENE1500X | 16654_at   | 16654_at   | 1     | 0.28  | 0.4   | 0.22  | 0.84  | 0.11  | -0.02 | - |
|           | 0.38       | -1.66      | -1.34 |       |       |       |       |       |       |   |
| GENE1785X | 17815_at   | 17815_at   | 1     | 0.4   | 0.34  | -0.1  | 0.95  | 0.79  | -0.1  | - |
|           | 1.26       | -1.56      | -2.51 |       |       |       |       |       |       |   |
| GENE1285X | 16065_at   | 16065_at   | 1     | -0.29 | 0.08  | 0.32  | 0.66  | 0.23  | 0     | - |
|           | 0.81       | -1.65      | -2    |       |       |       |       |       |       |   |
| GENE1906X | 18135_at   | 18135_at   | 1     | 0.37  | 0.52  | 0.27  | 0.22  | 0.32  | 0.25  | - |
|           | 0.57       | -0.51      | -1.02 |       |       |       |       |       |       |   |
| GENE1352X | 16279_at   | 16279_at   | 1     | 0.54  | 0.92  | 0.34  | 0.54  | 0.7   | -0.18 | - |
|           | 0.45       | -0.85      | -2.15 |       |       |       |       |       |       |   |
| GENE238X  | 12754_g_at | 12754_g_at | 1     | 0.18  | 0.36  | -0.12 | 0.11  | -0.51 | -0.92 | - |
|           | 0.07       | -1.1       | -1.11 |       |       |       |       |       |       |   |
| GENE875X  | 14916_at   | 14916_at   | 1     | 0.14  | 0.28  | -0.18 | 0.2   | -0.72 | -0.95 | - |
|           | 0.39       | -1.52      | -1.52 |       |       |       |       |       |       |   |
| GENE1404X | 16432_g_at | 16432_g_at | 1     | 0.16  | 0.42  | 0.15  | 0.5   | -0.29 | -0.75 | - |
|           | 0.23       | -1.3       | -1.55 |       |       |       |       |       |       |   |
| GENE1880X | 18072_at   | 18072_at   | 1     | 0.42  | 0.34  | 0.06  | 0.14  | -0.38 | -0.63 | - |
|           | 0.23       | -0.44      | -1.02 |       |       |       |       |       |       |   |
| GENE276X  | 12843_s_at | 12843_s_at | 1     | 0.01  | -0.1  | -0.33 | -0.06 | -0.32 | -0.73 | - |
|           | 0.38       | -0.65      | -2.78 |       |       |       |       |       |       |   |
| GENE1022X | 15270_at   | 15270_at   | 1     | -0.01 | -0.18 | -0.85 | 0.75  | -0.37 | -0.15 | - |
|           | 0.02       | -0.58      | -1.92 |       |       |       |       |       |       |   |

|           |            |            |       |       |       |          |       |       |       |   |
|-----------|------------|------------|-------|-------|-------|----------|-------|-------|-------|---|
| GENE1213X | 15896_at   | 15896_at   | 1     | -0.1  | 0.23  | -0.1     | 1.41  | -0.23 | -0.5  | - |
|           | 0.33       | -0.46      | -2.05 |       |       |          |       |       |       |   |
| GENE2673X | 20699_at   | 20699_at   | 1     | 0.23  | 0.33  | -1       | 0.05  | 0.48  | -0.12 | - |
|           | 0.86       | -0.37      | -1.2  |       |       |          |       |       |       |   |
| GENE638X  | 14023_at   | 14023_at   | 1     | -0.06 | 0.24  | 0.08     | -0.24 | -0.66 | -0.54 | - |
|           | 0.45       | -0.17      | -1.04 |       |       |          |       |       |       |   |
| GENE1847X | 17994_r_at | 17994_r_at | 1     | 0.23  | -0.02 | -0.14    | -0.36 | -0.9  | -1    | - |
|           | 0.57       | -0.88      | -0.72 |       |       |          |       |       |       |   |
| GENE17X   | 12029_at   | 12029_at   | 1     | 0.36  | 0.18  | 0.06     | -0.46 | -0.77 | -1.11 | - |
|           | 0.7        | -0.97      | -0.81 |       |       |          |       |       |       |   |
| GENE79X   | 12195_at   | 12195_at   | 1     | 0.24  | 0.01  | -0.21    | -0.85 | -1.37 | -1.3  | - |
|           | 1.03       | -1.09      | -0.79 |       |       |          |       |       |       |   |
| GENE2640X | 20612_s_at | 20612_s_at | 1     | 0.67  | 0.31  | -0.05    | -0.87 | -1.45 | -1.21 | - |
|           | 1.37       | -1.5       | -1.08 |       |       |          |       |       |       |   |
| GENE1975X | 18316_at   | 18316_at   | 1     | -0.16 | 0.19  | 0.08     | -1.17 | -1.38 | -1.63 | - |
|           | 1.35       | -1.92      | -1.65 |       |       |          |       |       |       |   |
| GENE1083X | 15493_at   | 15493_at   | 1     | -0.13 | 0.34  | 0.54     | -1.16 | -1.85 | -1.97 | - |
|           | 1.69       | -2.62      | -2.18 |       |       |          |       |       |       |   |
| GENE2536X | 20292_at   | 20292_at   | 1     | 0.28  | -0.29 | 0        | -0.79 | -1.23 | -0.92 | - |
|           | 0.84       | -1.32      | -1.27 |       |       |          |       |       |       |   |
| GENE1378X | 16348_at   | 16348_at   | 1     | 0.55  | 0.1   | -0.11    | -0.58 | -1.01 | -1.58 | - |
|           | 1.12       | -1.86      | -1.94 |       |       |          |       |       |       |   |
| GENE261X  | 12796_s_at | 12796_s_at | 1     | 0.23  | 0.2   | 0.13     | -0.63 | -1.45 | -1.25 | - |
|           | 1.36       | -2.16      | -2.22 |       |       |          |       |       |       |   |
| GENE1377X | 16347_at   | 16347_at   | 1     | 0.22  | 0.15  | 0.28     | -0.73 | -1.9  | -1.58 | - |
|           | 0.59       | -1.5       | -2.34 |       |       |          |       |       |       |   |
| GENE257X  | 12791_r_at | 12791_r_at | 1     | 0.33  | 0.22  | -0.00939 |       | -0.43 | -1.65 | - |
|           | 1.61       | -1.6       | -1.57 | -1.92 |       |          |       |       |       |   |
| GENE258X  | 12792_s_at | 12792_s_at | 1     | 0.4   | 0.32  | 0.02     | -0.24 | -2.04 | -1.94 | - |
|           | 2.29       | -2.17      | -2.71 |       |       |          |       |       |       |   |
| GENE68X   | 12171_at   | 12171_at   | 1     | 0.39  | 0.04  | -0.43    | -0.44 | -1.4  | -1.69 | - |
|           | 1.76       | -1.37      | -2.34 |       |       |          |       |       |       |   |
| GENE188X  | 12540_at   | 12540_at   | 1     | 0.95  | 0.58  | -0.04    | -0.86 | -1.06 | -2.09 | - |
|           | 0.77       | -1.63      | -1.47 |       |       |          |       |       |       |   |
| GENE1716X | 17499_s_at | 17499_s_at | 1     | 0.66  | 0.45  | 0.42     | -0.66 | -0.58 | -1.2  | - |
|           | 0.56       | -1.08      | -1.44 |       |       |          |       |       |       |   |
| GENE2580X | 20429_at   | 20429_at   | 1     | 1.04  | 0.43  | 0.25     | -0.37 | -1.18 | -1.61 | - |
|           | 0.64       | -1.68      | -1.79 |       |       |          |       |       |       |   |
| GENE952X  | 15108_s_at | 15108_s_at | 1     | 0.56  | 0.61  | 0.33     | -0.23 | -1.39 | -2    | - |
|           | 0.46       | -1.29      | -1.27 |       |       |          |       |       |       |   |
| GENE1270X | 16044_s_at | 16044_s_at | 1     | 0.15  | 0.19  | -0.12    | -0.19 | -0.69 | -1.02 | - |
|           | 0.27       | -0.92      | -1.15 |       |       |          |       |       |       |   |
| GENE1438X | 16503_at   | 16503_at   | 1     | 0.21  | 0.2   | -0.12    | -0.34 | -0.92 | -1.24 | - |
|           | 0.5        | -1.06      | -1.4  |       |       |          |       |       |       |   |
| GENE2073X | 18678_at   | 18678_at   | 1     | 0.4   | 0.27  | -0.00186 |       | -0.59 | -1.11 | - |
|           | 1.46       | -0.55      | -1.2  | -1.62 |       |          |       |       |       |   |
| GENE1232X | 15949_s_at | 15949_s_at | 1     | 0.53  | 0.47  | 0.06     | -0.08 | -0.87 | -1.25 | - |
|           | 0.27       | -1         | -1.36 |       |       |          |       |       |       |   |
| GENE1887X | 18079_g_at | 18079_g_at | 1     | 0.32  | 0.3   | 0.07     | -0.29 | -0.87 | -1.13 | - |
|           | 0.16       | -0.78      | -1.12 |       |       |          |       |       |       |   |
| GENE1399X | 16417_s_at | 16417_s_at | 1     | 0.36  | 0.29  | 0.08     | -0.22 | -0.79 | -1.08 | - |
|           | 0.03       | -0.9       | -1.29 |       |       |          |       |       |       |   |
| GENE2576X | 20412_at   | 20412_at   | 1     | 0.33  | -0.22 | -0.14    | -1.39 | -1.07 | -0.93 | - |
|           | 0.66       | -0.83      | -1.58 |       |       |          |       |       |       |   |
| GENE2262X | 19398_at   | 19398_at   | 1     | 0.02  | -0.3  | -0.27    | -1.35 | -1.42 | -0.92 | - |
|           | 0.7        | -1.18      | -1.22 |       |       |          |       |       |       |   |

|           |            |            |       |         |       |       |       |       |       |   |
|-----------|------------|------------|-------|---------|-------|-------|-------|-------|-------|---|
| GENE676X  | 14118_i_at | 14118_i_at | 1     | -0.11   | -0.21 | -0.46 | -1.62 | -1.81 | -1.91 | - |
|           | 0.92       | -1.58      | -1.33 |         |       |       |       |       |       |   |
| GENE1198X | 15845_at   | 15845_at   | 1     | 0.32    | 0.06  | 0.09  | -0.85 | -0.92 | -1.3  | - |
|           | 0.48       | -1.02      | -0.6  |         |       |       |       |       |       |   |
| GENE1348X | 16252_at   | 16252_at   | 1     | 0.21    | 0.26  | -0.21 | -0.82 | -0.79 | -1.06 | - |
|           | 0.26       | -0.39      | -0.42 |         |       |       |       |       |       |   |
| GENE1893X | 18085_r_at | 18085_r_at | 1     | 0.32    | 0.09  | -0.09 | -0.59 | -1.06 | -1.39 | - |
|           | 0.02       | -0.6       | -0.81 |         |       |       |       |       |       |   |
| GENE987X  | 15170_s_at | 15170_s_at | 1     | 0.17    | 0.05  | -0.2  | 0.03  | -1.33 | -1.93 |   |
|           | 0.2        | -1.98      | -2.25 |         |       |       |       |       |       |   |
| GENE206X  | 12610_at   | 12610_at   | 1     | 0.64    | 0.16  | -0.22 | -0.19 | -1.71 | -1.76 |   |
|           | 0.06       | -2.09      | -2.32 |         |       |       |       |       |       |   |
| GENE1898X | 18090_s_at | 18090_s_at | 1     | 0.29    | 0.27  | -0.11 | -0.15 | -0.84 | -1.38 | - |
|           | 0.22       | -1.03      | -1.71 |         |       |       |       |       |       |   |
| GENE1699X | 17449_at   | 17449_at   | 1     | 0.24    | 0.2   | -0.23 | 0.1   | -1.08 | -1.94 | - |
|           | 0.34       | -1.39      | -2.07 |         |       |       |       |       |       |   |
| GENE822X  | 14684_s_at | 14684_s_at | 1     | 0.17    | 0.1   | -0.14 | -0.08 | -0.77 | -1.12 | - |
|           | 0.18       | -0.86      | -1.12 |         |       |       |       |       |       |   |
| GENE1151X | 15659_at   | 15659_at   | 1     | 0.17    | 0.17  | -0.11 | -0.13 | -0.78 | -1.19 | - |
|           | 0.13       | -0.94      | -1.18 |         |       |       |       |       |       |   |
| GENE1561X | 16957_at   | 16957_at   | 1     | 0.28    | 0.12  | -0.26 | -0.18 | -1.14 | -1.5  | - |
|           | 0.27       | -1.1       | -1.48 |         |       |       |       |       |       |   |
| GENE403X  | 13213_s_at | 13213_s_at | 1     | 0.16    | 0.11  | -0.2  | -0.15 | -1.02 | -1.53 |   |
|           | 0.01       | -1.03      | -1.55 |         |       |       |       |       |       |   |
| GENE1892X | 18084_s_at | 18084_s_at | 1     | 0.18    | 0.22  | -0.07 | -0.25 | -0.87 | -1.28 |   |
|           | 0.07       | -0.67      | -1.2  |         |       |       |       |       |       |   |
| GENE2144X | 18937_at   | 18937_at   | 1     | 0.29    | 0.25  | -0.13 | 0.01  | -1.03 | -1.53 |   |
|           | 0.26       | -0.67      | -1.04 |         |       |       |       |       |       |   |
| GENE179X  | 12523_at   | 12523_at   | 1     | 0.55    | 0.35  | -0.23 | -0.06 | -2.22 | -1.71 |   |
|           | 0.39       | -1.63      | -1.87 |         |       |       |       |       |       |   |
| GENE1621X | 17115_s_at | 17115_s_at | 1     | 0.24    | -0.18 | -0.15 | -0.05 | -1.26 | -1.4  | - |
|           | 0.36       | -0.92      | -0.86 |         |       |       |       |       |       |   |
| GENE239X  | 12756_s_at | 12756_s_at | 1     | 0.35    | 0.14  | -0.05 | -0.14 | -1.31 | -1.58 | - |
|           | 0.28       | -1.14      | -1.2  |         |       |       |       |       |       |   |
| GENE2648X | 20628_at   | 20628_at   | 1     | 0.52    | -0.17 | -0.05 | -0.37 | -1.89 | -1.76 | - |
|           | 0.31       | -1.65      | -1.3  |         |       |       |       |       |       |   |
| GENE2059X | 18655_at   | 18655_at   | 1     | 0.3     | 0.02  | -0.32 | -0.23 | -0.95 | -1.01 | - |
|           | 0.21       | -0.63      | -0.91 |         |       |       |       |       |       |   |
| GENE836X  | 14726_s_at | 14726_s_at | 1     | 0.3     | 0.14  | -0.1  | -0.36 | -1.68 | -2.06 | - |
|           | 0.92       | -1.28      | -1.7  |         |       |       |       |       |       |   |
| GENE1401X | 16424_g_at | 16424_g_at | 1     | 0.17    | -0.03 | -0.28 | -0.37 | -1.06 | -1.29 | - |
|           | 0.29       | -1.03      | -1.24 |         |       |       |       |       |       |   |
| GENE1897X | 18089_r_at | 18089_r_at | 1     | -0.02   | -0.19 | -0.49 | -0.34 | -1.07 | -1.61 | - |
|           | 0.51       | -1.34      | -1.65 |         |       |       |       |       |       |   |
| GENE1606X | 17087_at   | 17087_at   | 1     | -0.12   | -0.24 | -0.51 | -0.5  | -1.59 | -2.42 | - |
|           | 0.83       | -1.95      | -2.2  |         |       |       |       |       |       |   |
| GENE1260X | 16024_at   | 16024_at   | 1     | 0.01    | -0.2  | -0.46 | -0.21 | -1.25 | -1.65 | - |
|           | 0.42       | -1.38      | -1.65 |         |       |       |       |       |       |   |
| GENE1409X | 16449_s_at | 16449_s_at | 1     | -0.0061 |       | -0.22 | -0.5  | -0.4  | -1.42 | - |
|           | 1.79       | -0.43      | -1.58 | -2.06   |       |       |       |       |       |   |
| GENE945X  | 15097_at   | 15097_at   | 1     | -0.07   | -0.33 | -0.71 | -0.52 | -1.97 | -2.58 | - |
|           | 0.62       | -2.08      | -2.69 |         |       |       |       |       |       |   |
| GENE1888X | 18080_at   | 18080_at   | 1     | 0.11    | 0.04  | -0.22 | -0.46 | -1.08 | -1.55 | - |
|           | 0.35       | -1.1       | -1.65 |         |       |       |       |       |       |   |
| GENE1890X | 18082_at   | 18082_at   | 1     | 0.06    | -0.08 | -0.32 | -0.43 | -1.04 | -1.68 | - |
|           | 0.38       | -1.25      | -1.8  |         |       |       |       |       |       |   |



|           |            |            |       |         |          |       |       |       |       |   |
|-----------|------------|------------|-------|---------|----------|-------|-------|-------|-------|---|
| GENE1883X | 18075_r_at | 18075_r_at | 1     | 0.09    | -0.06    | -0.3  | -0.59 | -1.24 | -1.51 | - |
|           | 0.62       | -1.37      | -1.81 |         |          |       |       |       |       |   |
| GENE1881X | 18073_g_at | 18073_g_at | 1     | 0.1     | -0.00621 |       | -0.32 | -0.42 | -1.07 | - |
|           | 1.39       | -0.49      | -1.4  | -1.83   |          |       |       |       |       |   |
| GENE1414X | 16455_at   | 16455_at   | 1     | 0.13    | -0.04    | -0.33 | -0.44 | -1.47 | -1.78 | - |
|           | 0.67       | -1.68      | -2.18 |         |          |       |       |       |       |   |
| GENE956X  | 15117_at   | 15117_at   | 1     | 0.12    | -0.19    | -0.45 | -0.55 | -1.67 | -2.33 | - |
|           | 0.93       | -1.9       | -2.89 |         |          |       |       |       |       |   |
| GENE412X  | 13234_s_at | 13234_s_at | 1     | 0.04    | -0.21    | -0.44 | -0.28 | -1.03 | -1.49 | - |
|           | 0.37       | -1.31      | -1.88 |         |          |       |       |       |       |   |
| GENE1882X | 18074_at   | 18074_at   | 1     | -0.12   | -0.38    | -0.63 | -0.43 | -1.52 | -1.81 | - |
|           | 0.55       | -1.64      | -2.43 |         |          |       |       |       |       |   |
| GENE967X  | 15133_at   | 15133_at   | 1     | -0.04   | -0.36    | -0.53 | -0.35 | -1.1  | -1.58 | - |
|           | 0.25       | -1.18      | -1.63 |         |          |       |       |       |       |   |
| GENE2066X | 18666_s_at | 18666_s_at | 1     | -0.36   | -0.41    | -0.75 | -0.55 | -1.79 | -2.29 | - |
|           | 0.5        | -1.81      | -2.66 |         |          |       |       |       |       |   |
| GENE771X  | 14545_at   | 14545_at   | 1     | -0.31   | -0.44    | -0.79 | -0.66 | -2.14 | -2.47 | - |
|           | 0.43       | -1.86      | -2.7  |         |          |       |       |       |       |   |
| GENE1317X | 16135_at   | 16135_at   | 1     | -0.2    | -0.56    | -0.72 | -0.74 | -1.59 | -2.22 | - |
|           | 0.68       | -1.63      | -2.58 |         |          |       |       |       |       |   |
| GENE1896X | 18088_i_at | 18088_i_at | 1     | -0.07   | -0.3     | -0.6  | -0.54 | -1.28 | -1.77 | - |
|           | 0.64       | -1.61      | -2.11 |         |          |       |       |       |       |   |
| GENE1884X | 18076_s_at | 18076_s_at | 1     | -0.14   | -0.27    | -0.57 | -0.5  | -1.51 | -1.82 | - |
|           | 0.72       | -1.78      | -2.26 |         |          |       |       |       |       |   |
| GENE2072X | 18677_at   | 18677_at   | 1     | -0.29   | -0.47    | -0.89 | -0.77 | -1.95 | -2.48 | - |
|           | 0.93       | -2.18      | -2.85 |         |          |       |       |       |       |   |
| GENE1011X | 15212_s_at | 15212_s_at | 1     | -0.16   | -0.51    | -0.77 | -0.49 | -1.92 | -2.31 | - |
|           | 0.73       | -2.04      | -2.7  |         |          |       |       |       |       |   |
| GENE2652X | 20640_s_at | 20640_s_at | 1     | 0.00779 |          | -0.52 | -0.94 | -0.75 | -2.33 | - |
|           | 2.69       | -1.03      | -2.52 | -3.13   |          |       |       |       |       |   |
| GENE1676X | 17393_at   | 17393_at   | 1     | -0.29   | -0.82    | -1.02 | -0.96 | -2.35 | -2.69 | - |
|           | 0.79       | -2.72      | -3.21 |         |          |       |       |       |       |   |
| GENE839X  | 14729_s_at | 14729_s_at | 1     | -0.08   | -0.35    | -0.62 | -0.32 | -1.4  | -2.07 | - |
|           | 0.27       | -1.12      | -1.59 |         |          |       |       |       |       |   |
| GENE86X   | 12218_at   | 12218_at   | 1     | -0.24   | -0.85    | -1.16 | -0.71 | -2.4  | -3.38 | - |
|           | 0.51       | -2.19      | -2.84 |         |          |       |       |       |       |   |
| GENE1444X | 16517_at   | 16517_at   | 1     | -0.08   | -0.61    | -0.94 | -0.68 | -2.36 | -3.48 | - |
|           | 0.86       | -2.21      | -2.57 |         |          |       |       |       |       |   |
| GENE492X  | 13546_at   | 13546_at   | 1     | -0.81   | -0.79    | -0.86 | 0.34  | -2.88 | -4.26 | - |
|           | 1.11       | -2.86      | -4    |         |          |       |       |       |       |   |
| GENE1485X | 16612_s_at | 16612_s_at | 1     | -0.29   | -0.43    | -0.38 | -0.12 | -0.99 | -1.29 | - |
|           | 0.61       | -1.12      | -1.78 |         |          |       |       |       |       |   |
| GENE835X  | 14725_s_at | 14725_s_at | 1     | -0.37   | -0.56    | -0.77 | -0.08 | -1.59 | -2.04 | - |
|           | 0.82       | -1.62      | -2.72 |         |          |       |       |       |       |   |
| GENE358X  | 13120_at   | 13120_at   | 1     | -0.31   | -0.47    | -0.77 | -0.23 | -1.57 | -2.4  | - |
|           | 0.89       | -2.34      | -3.67 |         |          |       |       |       |       |   |
| GENE912X  | 15035_at   | 15035_at   | 1     | -0.08   | -0.43    | -0.64 | -0.33 | -1.24 | -1.6  | - |
|           | 0.48       | -1.81      | -2.03 |         |          |       |       |       |       |   |
| GENE840X  | 14730_s_at | 14730_s_at | 1     | -0.24   | -0.23    | -0.32 | -0.08 | -0.71 | -0.91 | - |
|           | 0.37       | -0.99      | -1.14 |         |          |       |       |       |       |   |
| GENE1310X | 16124_s_at | 16124_s_at | 1     | -0.7    | -0.8     | -1.17 | -0.8  | -2.19 | -3.08 | - |
|           | 1.19       | -2.91      | -3.59 |         |          |       |       |       |       |   |
| GENE2440X | 20020_at   | 20020_at   | 1     | 0.18    | -0.32    | -0.29 | -0.1  | -0.7  | -0.81 | - |
|           | 0.34       | -0.88      | -1.04 |         |          |       |       |       |       |   |
| GENE2497X | 20196_at   | 20196_at   | 1     | 0       | -0.82    | -0.53 | -0.28 | -1.22 | -1.55 | - |
|           | 0.26       | -1.85      | -1.74 |         |          |       |       |       |       |   |

|           |            |            |       |       |       |         |       |       |       |   |
|-----------|------------|------------|-------|-------|-------|---------|-------|-------|-------|---|
| GENE1943X | 18264_at   | 18264_at   | 1     | 0.09  | -0.24 | -0.39   | -0.38 | -1    | -1.35 | - |
|           | 0.06       | -1.09      | -1.25 |       |       |         |       |       |       |   |
| GENE1288X | 16068_s_at | 16068_s_at | 1     | -0.01 | -0.11 | -0.4    | -0.33 | -0.78 | -1.26 | - |
|           | 0.04       | -0.95      | -1.3  |       |       |         |       |       |       |   |
| GENE1246X | 15995_at   | 15995_at   | 1     | 0.06  | -0.05 | -0.33   | -0.24 | -0.98 | -1.25 | - |
|           | 0.18       | -1.12      | -1.41 |       |       |         |       |       |       |   |
| GENE1250X | 16004_s_at | 16004_s_at | 1     | 0.2   | -0.08 | -0.27   | -0.28 | -1.12 | -1.43 | - |
|           | 0.11       | -1.17      | -1.6  |       |       |         |       |       |       |   |
| GENE1255X | 16015_at   | 16015_at   | 1     | 0.04  | -0.4  | -0.65   | -0.26 | -1.96 | -2.56 | - |
|           | 0.17       | -1.91      | -2.52 |       |       |         |       |       |       |   |
| GENE2275X | 19439_at   | 19439_at   | 1     | 0.19  | -0.27 | -0.58   | 0.01  | -1.02 | -1.7  | - |
|           | 0.05       | -1.29      | -1.58 |       |       |         |       |       |       |   |
| GENE876X  | 14921_at   | 14921_at   | 1     | 0.05  | -0.24 | -0.43   | -0.48 | -1    | -1.32 | - |
|           | 0.23       | -0.41      | -1.15 |       |       |         |       |       |       |   |
| GENE1885X | 18077_at   | 18077_at   | 1     | 0.11  | 0.14  | -0.36   | -0.7  | -1.19 | -1.52 | - |
|           | 0.22       | -0.81      | -1.73 |       |       |         |       |       |       |   |
| GENE2413X | 19961_at   | 19961_at   | 1     | -0.01 | -0.22 | -0.37   | -0.49 | -0.75 | -0.83 | - |
|           | 0.57       | -0.5       | -1.65 |       |       |         |       |       |       |   |
| GENE2450X | 20054_at   | 20054_at   | 1     | -0.06 | -0.16 | -0.43   | 0.09  | -1.13 | -1.87 | - |
|           | 0.92       | -1.37      | -3.51 |       |       |         |       |       |       |   |
| GENE161X  | 12453_at   | 12453_at   | 1     | -0.27 | 0     | -0.39   | -0.27 | -0.7  | -0.56 | - |
|           | 0.51       | -0.54      | -1.09 |       |       |         |       |       |       |   |
| GENE372X  | 13144_at   | 13144_at   | 1     | -0.56 | -0.7  | -1.03   | -0.1  | -2.36 | -2.11 | - |
|           | 1.58       | -2.58      | -4.17 |       |       |         |       |       |       |   |
| GENE752X  | 14508_at   | 14508_at   | 1     | -0.62 | -1.03 | -2      | -0.64 | -2.87 | -2.78 | - |
|           | 1.86       | -2.63      | -4.89 |       |       |         |       |       |       |   |
| GENE1256X | 16017_at   | 16017_at   | 1     | -0.8  | -0.9  | -1.18   | -1.05 | -2.67 | -2.9  | - |
|           | 2.76       | -3.51      | -6.15 |       |       |         |       |       |       |   |
| GENE1498X | 16647_s_at | 16647_s_at | 1     | -0.25 | -0.2  | -0.43   | 0.38  | -0.88 | -1.38 |   |
|           | 0.11       | -0.8       | -1.3  |       |       |         |       |       |       |   |
| GENE821X  | 14679_at   | 14679_at   | 1     | -0.13 | -0.4  | -0.8    | 0.22  | -1.51 | -2.2  | - |
|           | 0.11       | -0.71      | -2.08 |       |       |         |       |       |       |   |
| GENE1000X | 15194_s_at | 15194_s_at | 1     | -0.02 | -0.22 | -0.24   | 0.21  | -0.73 | -1.76 | - |
|           | 0.03       | -0.46      | -1.77 |       |       |         |       |       |       |   |
| GENE231X  | 12738_r_at | 12738_r_at | 1     | 0.32  | -0.27 | -0.47   | 0.01  | -0.63 | -1.1  |   |
|           | 0.15       | -0.9       | -1.72 |       |       |         |       |       |       |   |
| GENE1194X | 15835_at   | 15835_at   | 1     | 0.41  | -0.49 | -0.83   | 0.25  | -0.77 | -1.58 | - |
|           | 0.67       | -1.02      | -1.97 |       |       |         |       |       |       |   |
| GENE1870X | 18034_s_at | 18034_s_at | 1     | -0.23 | 0.24  | 0.66    | -0.15 | -0.54 | -0.76 | - |
|           | 0.21       | -0.73      | -1.03 |       |       |         |       |       |       |   |
| GENE576X  | 13782_at   | 13782_at   | 1     | -0.26 | 0.5   | 0.63    | 0.31  | -0.16 | -0.83 | - |
|           | 0.02       | -1.14      | -1.04 |       |       |         |       |       |       |   |
| GENE1510X | 16690_g_at | 16690_g_at | 1     | -0.33 | 0.23  | 0.63    | 0.35  | -0.27 | -0.38 | - |
|           | 0.37       | -0.77      | -1.17 |       |       |         |       |       |       |   |
| GENE1710X | 17480_at   | 17480_at   | 1     | 0.01  | 0.19  | 0.54    | 0.08  | -0.39 | -0.98 | - |
|           | 0.8        | -1.77      | -1.06 |       |       |         |       |       |       |   |
| GENE2649X | 20629_at   | 20629_at   | 1     | 0.52  | 0.26  | 0.23    | 0.14  | -0.19 | -0.7  | - |
|           | 0.36       | -1.11      | -0.93 |       |       |         |       |       |       |   |
| GENE1129X | 15608_at   | 15608_at   | 1     | 0.42  | 0.19  | -0.07   | 0.1   | -0.63 | -0.56 | - |
|           | 0.59       | -1.08      | -0.83 |       |       |         |       |       |       |   |
| GENE2530X | 20282_at   | 20282_at   | 1     | 0.63  | 0.47  | 0.34    | -0.19 | -0.62 | -0.77 | - |
|           | 1.2        | -1.76      | -1.42 |       |       |         |       |       |       |   |
| GENE2510X | 20232_s_at | 20232_s_at | 1     | 1.07  | 0.3   | 0.43    | -0.41 | -0.8  | -0.97 | - |
|           | 1.45       | -2.55      | -1.55 |       |       |         |       |       |       |   |
| GENE2482X | 20162_s_at | 20162_s_at | 1     | 0.44  | 0.28  | 0.00322 |       | 0.1   | -0.55 | - |
|           | 0.51       | -0.55      | -0.81 | -1.56 |       |         |       |       |       |   |



|           |            |            |       |       |       |       |       |       |       |   |
|-----------|------------|------------|-------|-------|-------|-------|-------|-------|-------|---|
| GENE514X  | 13577_s_at | 13577_s_at | 1     | 0.33  | 0.09  | 0     | -0.19 | -1.09 | -1.22 | - |
|           | 0.49       | -1.58      | -2.15 |       |       |       |       |       |       |   |
| GENE1599X | 17054_s_at | 17054_s_at | 1     | 0.42  | -0.21 | -0.49 | -0.8  | -1.99 | -2.51 | - |
|           | 1.72       | -2.44      | -3.07 |       |       |       |       |       |       |   |
| GENE16X   | 12028_at   | 12028_at   | 1     | 0.44  | -0.1  | -0.28 | -0.71 | -2.71 | -2.98 | - |
|           | 2.04       | -2.67      | -3.8  |       |       |       |       |       |       |   |
| GENE359X  | 13121_at   | 13121_at   | 1     | 0.13  | -0.1  | -0.1  | -0.07 | -0.89 | -0.94 | - |
|           | 0.45       | -1.04      | -1.2  |       |       |       |       |       |       |   |
| GENE907X  | 15022_at   | 15022_at   | 1     | 0.3   | -0.25 | -0.13 | -0.09 | -0.94 | -1.39 | - |
|           | 0.78       | -1.33      | -1.65 |       |       |       |       |       |       |   |
| GENE898X  | 14993_at   | 14993_at   | 1     | 0     | -0.4  | -0.09 | 0.37  | -0.83 | -0.91 | - |
|           | 0.58       | -0.86      | -1.35 |       |       |       |       |       |       |   |
| GENE1015X | 15219_at   | 15219_at   | 1     | 0.45  | -0.26 | -0.65 | 0.15  | -2.43 | -1.29 | - |
|           | 1.83       | -2.67      | -3.67 |       |       |       |       |       |       |   |
| GENE2421X | 19981_at   | 19981_at   | 1     | 0.07  | -0.07 | -0.33 | 0.19  | -0.54 | -0.54 | - |
|           | 0.38       | -0.84      | -1.04 |       |       |       |       |       |       |   |
| GENE1541X | 16899_at   | 16899_at   | 1     | 0.11  | -0.27 | -0.49 | 0.14  | -1.56 | -1.62 | - |
|           | 1.15       | -2.18      | -2.21 |       |       |       |       |       |       |   |
| GENE506X  | 13563_at   | 13563_at   | 1     | -0.11 | 0     | -0.07 | -0.04 | -0.46 | -0.62 | - |
|           | 0.25       | -0.91      | -1.05 |       |       |       |       |       |       |   |
| GENE2531X | 20284_at   | 20284_at   | 1     | -0.13 | -0.07 | -0.38 | 0.1   | -0.94 | -1.22 | - |
|           | 0.87       | -2.33      | -2.21 |       |       |       |       |       |       |   |
| GENE2272X | 19431_s_at | 19431_s_at | 1     | -0.11 | -0.3  | -0.33 | -0.01 | -1.4  | -1.65 | - |
|           | 1.61       | -3         | -3.37 |       |       |       |       |       |       |   |
| GENE626X  | 14008_at   | 14008_at   | 1     | 0.14  | -0.3  | -0.45 | -0.17 | -0.65 | -0.79 | - |
|           | 0.77       | -1.33      | -1.33 |       |       |       |       |       |       |   |
| GENE1311X | 16125_s_at | 16125_s_at | 1     | -0.21 | -0.36 | -0.53 | -0.38 | -1.51 | -1.73 | - |
|           | 1.23       | -2.22      | -2.29 |       |       |       |       |       |       |   |
| GENE249X  | 12774_at   | 12774_at   | 1     | -0.12 | -0.18 | -0.47 | -0.41 | -1.14 | -1.4  | - |
|           | 1.16       | -2.06      | -2.25 |       |       |       |       |       |       |   |
| GENE1578X | 17000_at   | 17000_at   | 1     | -0.07 | -0.39 | -0.66 | -0.44 | -1.5  | -1.69 | - |
|           | 1.35       | -2.33      | -2.81 |       |       |       |       |       |       |   |
| GENE1421X | 16468_at   | 16468_at   | 1     | -0.4  | -0.78 | -1.19 | -0.1  | -2.73 | -1.94 | - |
|           | 1.43       | -2.91      | -3.47 |       |       |       |       |       |       |   |
| GENE642X  | 14029_at   | 14029_at   | 1     | -0.41 | -0.67 | -1.41 | -0.03 | -3    | -2.58 | - |
|           | 1.43       | -3.19      | -3.86 |       |       |       |       |       |       |   |
| GENE1180X | 15776_at   | 15776_at   | 1     | -0.29 | -0.34 | -0.71 | -0.31 | -1.05 | -1.13 | - |
|           | 0.56       | -1.89      | -2.01 |       |       |       |       |       |       |   |
| GENE2588X | 20449_at   | 20449_at   | 1     | -0.29 | -0.62 | -1.31 | -0.24 | -1.85 | -2.05 | - |
|           | 1.61       | -3.53      | -3.53 |       |       |       |       |       |       |   |
| GENE2026X | 18581_at   | 18581_at   | 1     | -0.39 | -0.97 | -0.75 | -0.18 | -1.91 | -1.52 | - |
|           | 1.59       | -2.76      | -2.8  |       |       |       |       |       |       |   |
| GENE1183X | 15781_at   | 15781_at   | 1     | -0.44 | -0.9  | -0.65 | -0.2  | -1.93 | -1.61 | - |
|           | 1.1        | -2.41      | -2.9  |       |       |       |       |       |       |   |
| GENE159X  | 12450_at   | 12450_at   | 1     | -0.01 | -0.2  | -0.21 | -0.5  | -0.4  | -0.37 | - |
|           | 0.97       | -1.29      | -1.62 |       |       |       |       |       |       |   |
| GENE1812X | 17901_at   | 17901_at   | 1     | 0.17  | -0.56 | -0.73 | -0.62 | -0.61 | -1.23 | - |
|           | 2.06       | -2.37      | -2.31 |       |       |       |       |       |       |   |
| GENE285X  | 12886_s_at | 12886_s_at | 1     | -0.19 | -0.59 | -0.52 | -0.14 | -0.66 | -1.19 | - |
|           | 1.28       | -1.76      | -2.29 |       |       |       |       |       |       |   |
| GENE441X  | 13293_s_at | 13293_s_at | 1     | -0.07 | -0.22 | -0.43 | -0.03 | -1    | -0.74 | - |
|           | 1.34       | -1.81      | -2.52 |       |       |       |       |       |       |   |
| GENE1521X | 16751_at   | 16751_at   | 1     | 0.11  | -0.84 | -0.84 | -0.4  | -1.4  | -1.2  | - |
|           | 1.95       | -2.45      | -3.72 |       |       |       |       |       |       |   |
| GENE2658X | 20649_at   | 20649_at   | 1     | 0.28  | 0.13  | -0.1  | -0.27 | -0.31 | -1.18 | - |
|           | 0.71       | -1.24      | -1.75 |       |       |       |       |       |       |   |

|           |            |            |       |       |          |       |       |       |       |    |
|-----------|------------|------------|-------|-------|----------|-------|-------|-------|-------|----|
| GENE1320X | 16140_s_at | 16140_s_at | 1     | 0.08  | -0.2     | -0.31 | -0.39 | -0.23 | -1.02 | -  |
|           | 1.01       | -1.16      | -1.52 |       |          |       |       |       |       |    |
| GENE1043X | 15385_at   | 15385_at   | 1     | -0.09 | -0.05    | -0.91 | -0.37 | -0.4  | -1.62 | -  |
|           | 1.2        | -1.48      | -2.34 |       |          |       |       |       |       |    |
| GENE190X  | 12549_s_at | 12549_s_at | 1     | 0.05  | -0.07    | -0.16 | 0.42  | -0.51 | -0.38 | -  |
|           | 0.26       | -1.33      | -0.64 |       |          |       |       |       |       |    |
| GENE649X  | 14051_at   | 14051_at   | 1     | -0.11 | -0.00692 |       | -0.22 | 0.41  | -0.89 | -  |
|           | 0.84       | -0.79      | -1.79 | -1.18 |          |       |       |       |       |    |
| GENE2225X | 19219_at   | 19219_at   | 1     | 0.03  | -0.74    | -0.85 | 0.21  | -0.97 | -1.44 | -  |
|           | 1.01       | -4.44      | -2.68 |       |          |       |       |       |       |    |
| GENE1267X | 16041_s_at | 16041_s_at | 1     | 0.01  | 0.07     | -0.01 | 0.11  | -0.75 | -0.31 | -  |
|           | 0.88       | -1.51      | -0.91 |       |          |       |       |       |       |    |
| GENE1850X | 17997_s_at | 17997_s_at | 1     | -0.1  | -0.13    | -0.16 | -0.19 | -0.93 | -0.33 | -  |
|           | 1.07       | -1.48      | -0.93 |       |          |       |       |       |       |    |
| GENE1126X | 15601_s_at | 15601_s_at | 1     | -0.09 | -0.1     | -0.08 | -0.53 | -1.38 | -0.81 | -  |
|           | 1.72       | -2.49      | -1.95 |       |          |       |       |       |       |    |
| GENE87X   | 12223_s_at | 12223_s_at | 1     | 0.07  | -0.00738 |       | -0.29 | -0.16 | -1.5  | -1 |
|           | -1.57      | -2.44      | -1.63 |       |          |       |       |       |       |    |
| GENE1150X | 15658_at   | 15658_at   | 1     | -0.11 | -0.07    | 0     | -0.05 | -0.79 | -0.91 | -  |
|           | 1.01       | -1.64      | -1.35 |       |          |       |       |       |       |    |
| GENE2134X | 18911_at   | 18911_at   | 1     | -0.41 | -0.08    | -0.09 | -0.14 | -1.26 | -1.44 | -  |
|           | 2.47       | -2.86      | -2.81 |       |          |       |       |       |       |    |
| GENE516X  | 13587_at   | 13587_at   | 1     | -0.56 | -0.56    | -0.9  | -0.16 | -1.66 | -1.78 | -  |
|           | 3.45       | -3.94      | -3.94 |       |          |       |       |       |       |    |
| GENE1851X | 17999_at   | 17999_at   | 1     | 0.05  | -0.41    | -0.48 | -0.22 | -1.04 | -1.36 | -  |
|           | 2.41       | -3.84      | -3.26 |       |          |       |       |       |       |    |
| GENE2539X | 20298_at   | 20298_at   | 1     | -0.28 | -0.82    | -0.69 | -0.32 | -0.84 | -0.53 | -  |
|           | 1.46       | -2.27      | -1.05 |       |          |       |       |       |       |    |
| GENE798X  | 14623_g_at | 14623_g_at | 1     | -0.21 | -0.33    | -0.61 | 0.19  | -0.71 | -0.47 | -  |
|           | 0.84       | -1.48      | -0.91 |       |          |       |       |       |       |    |
| GENE901X  | 14998_at   | 14998_at   | 1     | -0.02 | -0.24    | -0.4  | -0.12 | -0.28 | -0.25 | -  |
|           | 1.15       | -2.05      | -1.39 |       |          |       |       |       |       |    |
| GENE2663X | 20665_s_at | 20665_s_at | 1     | 0.1   | -0.16    | -0.16 | -0.04 | -0.72 | -0.64 | -  |
|           | 0.64       | -1.23      | -0.47 |       |          |       |       |       |       |    |
| GENE2410X | 19955_at   | 19955_at   | 1     | 0.09  | -0.12    | -0.26 | 0.09  | -0.73 | -0.62 | -  |
|           | 0.6        | -1.18      | -0.72 |       |          |       |       |       |       |    |
| GENE168X  | 12482_s_at | 12482_s_at | 1     | 0.48  | -0.27    | -0.32 | -0.08 | -0.8  | -0.76 | -  |
|           | 0.46       | -1.29      | -0.72 |       |          |       |       |       |       |    |
| GENE1214X | 15898_at   | 15898_at   | 1     | 0.37  | -0.15    | -0.25 | -0.02 | -0.71 | -0.94 | -  |
|           | 0.29       | -1.05      | -0.79 |       |          |       |       |       |       |    |
| GENE1445X | 16518_at   | 16518_at   | 1     | 0.08  | -0.25    | -0.25 | 0.32  | -0.47 | -1.44 | -  |
|           | 1.08       | -1.26      | -0.87 |       |          |       |       |       |       |    |
| GENE698X  | 14371_at   | 14371_at   | 1     | 0     | -0.08    | -0.21 | -0.51 | -0.73 | -1.18 | -  |
|           | 0.89       | -1.06      | -1.02 |       |          |       |       |       |       |    |
| GENE177X  | 12515_at   | 12515_at   | 1     | -0.03 | -0.17    | -0.19 | -0.82 | -0.88 | -1.64 | -  |
|           | 1.31       | -2.07      | -1.75 |       |          |       |       |       |       |    |
| GENE2408X | 19949_at   | 19949_at   | 1     | -0.34 | 0.03     | -0.38 | -0.8  | -0.91 | -1.29 | -  |
|           | 0.84       | -1.17      | -1.3  |       |          |       |       |       |       |    |
| GENE1818X | 17917_s_at | 17917_s_at | 1     | -0.07 | -0.06    | -0.53 | -0.74 | -0.94 | -1.81 | -  |
|           | 0.86       | -1.21      | -1.54 |       |          |       |       |       |       |    |
| GENE2256X | 19382_at   | 19382_at   | 1     | 0     | -0.4     | -0.32 | -0.58 | -1.52 | -1.72 | -  |
|           | 1.58       | -2.19      | -1.76 |       |          |       |       |       |       |    |
| GENE1673X | 17387_at   | 17387_at   | 1     | -0.14 | -0.28    | -0.43 | -0.67 | -1.97 | -1.97 | -  |
|           | 1.97       | -2.8       | -1.86 |       |          |       |       |       |       |    |
| GENE313X  | 13001_at   | 13001_at   | 1     | 0.13  | -0.39    | -0.47 | -0.48 | -1.26 | -1.33 | -  |
|           | 1.14       | -1.61      | -1.56 |       |          |       |       |       |       |    |

|           |            |            |       |       |       |       |       |       |       |   |
|-----------|------------|------------|-------|-------|-------|-------|-------|-------|-------|---|
| GENE922X  | 15054_at   | 15054_at   | 1     | -0.02 | -0.62 | -0.58 | -0.51 | -1.85 | -2.23 | - |
|           | 1.58       | -2.51      | -2.39 |       |       |       |       |       |       |   |
| GENE1835X | 17957_at   | 17957_at   | 1     | 0.08  | -0.8  | -1.09 | -0.77 | -3.25 | -3.19 | - |
|           | 2.36       | -3.88      | -3.71 |       |       |       |       |       |       |   |
| GENE539X  | 13628_at   | 13628_at   | 1     | -0.37 | -0.67 | -1.02 | -0.97 | -3.66 | -2.92 | - |
|           | 2.97       | -3.97      | -4.23 |       |       |       |       |       |       |   |
| GENE1278X | 16057_s_at | 16057_s_at | 1     | -0.44 | -0.31 | -0.29 | -0.32 | -1.1  | -1.35 | - |
|           | 0.97       | -1.32      | -1.48 |       |       |       |       |       |       |   |
| GENE1742X | 17566_at   | 17566_at   | 1     | -0.59 | -0.55 | -0.22 | -1    | -1.95 | -2.67 | - |
|           | 1.49       | -2.57      | -2.28 |       |       |       |       |       |       |   |
| GENE2568X | 20389_at   | 20389_at   | 1     | -0.3  | -0.86 | -1.19 | -0.67 | -2.55 | -2.74 | - |
|           | 1.7        | -2.95      | -2.7  |       |       |       |       |       |       |   |
| GENE2052X | 18634_at   | 18634_at   | 1     | -0.27 | -0.92 | -1.3  | -0.69 | -2.6  | -3.27 | - |
|           | 1.88       | -3.17      | -2.94 |       |       |       |       |       |       |   |
| GENE2430X | 19996_at   | 19996_at   | 1     | -0.37 | -0.76 | -1.06 | -0.86 | -2.69 | -3.02 | - |
|           | 1.47       | -3.11      | -2.85 |       |       |       |       |       |       |   |
| GENE1379X | 16351_at   | 16351_at   | 1     | -0.27 | -0.93 | -0.66 | -0.39 | -2.68 | -3.27 | - |
|           | 1.64       | -3.4       | -2.92 |       |       |       |       |       |       |   |
| GENE528X  | 13609_at   | 13609_at   | 1     | -0.45 | -0.47 | -0.51 | -0.08 | -0.5  | -0.94 | - |
|           | 0.89       | -1.34      | -1.08 |       |       |       |       |       |       |   |
| GENE1717X | 17505_s_at | 17505_s_at | 1     | -0.32 | -0.38 | -0.5  | -0.18 | -0.54 | -1.23 | - |
|           | 0.85       | -1.11      | -1.28 |       |       |       |       |       |       |   |
| GENE648X  | 14047_g_at | 14047_g_at | 1     | -0.16 | -0.58 | -0.66 | 0.05  | -0.66 | -1.58 | - |
|           | 1.33       | -1.68      | -1.61 |       |       |       |       |       |       |   |
| GENE747X  | 14501_at   | 14501_at   | 1     | -0.14 | -0.58 | -0.66 | -0.31 | -0.86 | -0.78 | - |
|           | 0.75       | -1.25      | -1.26 |       |       |       |       |       |       |   |
| GENE986X  | 15167_s_at | 15167_s_at | 1     | -0.49 | -1.34 | -1.24 | -0.87 | -1.83 | -1.75 | - |
|           | 2.12       | -2.62      | -2.46 |       |       |       |       |       |       |   |
| GENE67X   | 12170_at   | 12170_at   | 1     | -0.14 | -0.72 | -0.77 | -0.28 | -0.82 | -1.09 | - |
|           | 1.04       | -1.22      | -1.55 |       |       |       |       |       |       |   |
| GENE1596X | 17050_s_at | 17050_s_at | 1     | -0.2  | -1.75 | -1.4  | -0.84 | -1.58 | -2.43 | - |
|           | 1.76       | -2.67      | -3.08 |       |       |       |       |       |       |   |
| GENE2001X | 18475_at   | 18475_at   | 1     | -0.51 | -0.63 | -0.89 | -0.23 | -1.01 | -1.01 | - |
|           | 1.08       | -1.31      | -1.25 |       |       |       |       |       |       |   |
| GENE1828X | 17943_at   | 17943_at   | 1     | -0.49 | -0.87 | -1.21 | -0.15 | -1.71 | -1.49 | - |
|           | 1.66       | -1.63      | -1.81 |       |       |       |       |       |       |   |
| GENE536X  | 13621_g_at | 13621_g_at | 1     | -0.27 | -0.47 | -1.02 | -0.26 | -1.41 | -0.96 | - |
|           | 1.21       | -1.59      | -1.67 |       |       |       |       |       |       |   |
| GENE382X  | 13160_at   | 13160_at   | 1     | -0.54 | -1.19 | -1.71 | -0.35 | -2.25 | -1.97 | - |
|           | 2.25       | -3         | -2.76 |       |       |       |       |       |       |   |
| GENE218X  | 12693_at   | 12693_at   | 1     | -0.58 | -0.82 | -1.04 | -0.33 | -1.27 | -1    | - |
|           | 1.31       | -1.91      | -1.44 |       |       |       |       |       |       |   |
| GENE2375X | 19870_s_at | 19870_s_at | 1     | -0.68 | -1.04 | -1.2  | -0.33 | -1.82 | -1.33 | - |
|           | 1.93       | -2.47      | -1.93 |       |       |       |       |       |       |   |
| GENE1891X | 18083_r_at | 18083_r_at | 1     | -0.08 | -0.37 | -0.46 | -0.33 | -0.73 | -0.83 | - |
|           | 0.42       | -0.89      | -1.24 |       |       |       |       |       |       |   |
| GENE1137X | 15624_s_at | 15624_s_at | 1     | -0.2  | -0.51 | -0.56 | -0.66 | -1.13 | -1.49 | - |
|           | 0.75       | -1.38      | -1.71 |       |       |       |       |       |       |   |
| GENE1830X | 17947_at   | 17947_at   | 1     | -0.24 | -0.57 | -0.92 | -0.62 | -1.78 | -2.21 | - |
|           | 1.16       | -2.09      | -2.44 |       |       |       |       |       |       |   |
| GENE2483X | 20164_at   | 20164_at   | 1     | -0.26 | -0.59 | -0.87 | -0.67 | -1.75 | -2.03 | - |
|           | 1.09       | -1.96      | -2.45 |       |       |       |       |       |       |   |
| GENE1115X | 15578_s_at | 15578_s_at | 1     | -0.45 | -0.52 | -0.52 | -0.74 | -1.34 | -1.84 | - |
|           | 1.35       | -1.96      | -2.35 |       |       |       |       |       |       |   |
| GENE942X  | 15093_at   | 15093_at   | 1     | -0.39 | -0.8  | -1.01 | -1.03 | -2.1  | -2.53 | - |
|           | 1.75       | -2.94      | -3.72 |       |       |       |       |       |       |   |

|           |            |            |       |       |       |       |       |       |       |   |
|-----------|------------|------------|-------|-------|-------|-------|-------|-------|-------|---|
| GENE759X  | 14523_at   | 14523_at   | 1     | -0.34 | -0.53 | -0.62 | -0.86 | -1.34 | -1.6  | - |
|           | 1.21       | -1.68      | -1.96 |       |       |       |       |       |       |   |
| GENE2388X | 19898_at   | 19898_at   | 1     | -0.54 | -0.9  | -0.99 | -0.74 | -2    | -2.23 | - |
|           | 1.71       | -2.34      | -2.99 |       |       |       |       |       |       |   |
| GENE2325X | 19652_at   | 19652_at   | 1     | -0.22 | -0.79 | -0.91 | -0.19 | -2.67 | -2.67 | - |
|           | 1.96       | -2.33      | -2.83 |       |       |       |       |       |       |   |
| GENE1714X | 17494_s_at | 17494_s_at | 1     | -0.24 | -0.58 | -0.69 | -0.47 | -2.02 | -2.32 | - |
|           | 1.8        | -2.1       | -2.69 |       |       |       |       |       |       |   |
| GENE153X  | 12430_at   | 12430_at   | 1     | -0.2  | -0.98 | -1.16 | -0.78 | -2.87 | -3.41 | - |
|           | 2.65       | -3.07      | -3.27 |       |       |       |       |       |       |   |
| GENE1739X | 17560_s_at | 17560_s_at | 1     | -1    | -1.12 | -1.49 | -0.46 | -2.85 | -3.26 | - |
|           | 2.65       | -2.87      | -4.05 |       |       |       |       |       |       |   |
| GENE802X  | 14634_s_at | 14634_s_at | 1     | -0.64 | -1.18 | -1.32 | -0.39 | -2.41 | -3.01 | - |
|           | 2.25       | -2.96      | -4.1  |       |       |       |       |       |       |   |
| GENE2390X | 19901_at   | 19901_at   | 1     | -0.35 | -0.39 | -0.32 | -0.24 | -0.8  | -1.11 | - |
|           | 0.7        | -1.45      | -1.05 |       |       |       |       |       |       |   |
| GENE2384X | 19889_at   | 19889_at   | 1     | -0.23 | -0.55 | -0.57 | -0.54 | -1.27 | -1.46 | - |
|           | 0.88       | -2.2       | -1.73 |       |       |       |       |       |       |   |
| GENE160X  | 12452_at   | 12452_at   | 1     | 0     | -0.43 | -0.51 | -0.19 | -0.75 | -1.06 | - |
|           | 0.9        | -1.6       | -1.22 |       |       |       |       |       |       |   |
| GENE280X  | 12860_s_at | 12860_s_at | 1     | -0.14 | -0.44 | -0.48 | -0.39 | -0.95 | -1.45 | - |
|           | 1.07       | -1.71      | -1.61 |       |       |       |       |       |       |   |
| GENE816X  | 14666_s_at | 14666_s_at | 1     | -0.53 | -0.8  | -1.01 | -0.14 | -1.43 | -2.14 | - |
|           | 0.87       | -2.13      | -2.24 |       |       |       |       |       |       |   |
| GENE1962X | 18296_at   | 18296_at   | 1     | -0.63 | -0.95 | -1.44 | -0.17 | -1.92 | -2.38 | - |
|           | 1.62       | -2.96      | -3    |       |       |       |       |       |       |   |
| GENE2055X | 18638_at   | 18638_at   | 1     | -0.24 | -0.48 | -0.79 | -0.08 | -1.14 | -1.38 | - |
|           | 0.64       | -1.78      | -1.71 |       |       |       |       |       |       |   |
| GENE2391X | 19902_at   | 19902_at   | 1     | -0.18 | -0.59 | -0.74 | 0.14  | -1.12 | -1.26 | - |
|           | 0.73       | -1.82      | -1.82 |       |       |       |       |       |       |   |
| GENE1864X | 18023_s_at | 18023_s_at | 1     | -0.83 | -1.14 | -1.16 | -0.59 | -1.94 | -1.87 | - |
|           | 1.45       | -3.11      | -2.37 |       |       |       |       |       |       |   |
| GENE2428X | 19994_at   | 19994_at   | 1     | -0.51 | -0.84 | -1.03 | -0.35 | -1.63 | -1.26 | - |
|           | 0.92       | -2.21      | -1.81 |       |       |       |       |       |       |   |
| GENE1461X | 16547_s_at | 16547_s_at | 1     | -1.14 | -2.4  | -2.69 | -0.39 | -3.64 | -3.3  | - |
|           | 2.29       | -5.56      | -4.71 |       |       |       |       |       |       |   |
| GENE519X  | 13593_at   | 13593_at   | 1     | -0.74 | -1.13 | -1.26 | -0.13 | -1.51 | -1.7  | - |
|           | 1.24       | -2.45      | -2.2  |       |       |       |       |       |       |   |
| GENE689X  | 14284_at   | 14284_at   | 1     | -1.18 | -1.45 | -1.65 | -0.54 | -2.41 | -2.09 | - |
|           | 1.94       | -3.45      | -3.45 |       |       |       |       |       |       |   |
| GENE2447X | 20047_at   | 20047_at   | 1     | -0.33 | -0.48 | -0.39 | 0.18  | -1.46 | -1.42 | - |
|           | 0.36       | -1.38      | -0.88 |       |       |       |       |       |       |   |
| GENE2437X | 20016_at   | 20016_at   | 1     | 0.05  | -0.14 | -0.28 | 0.18  | -1.92 | -1.57 | - |
|           | 0.66       | -1.87      | -1.51 |       |       |       |       |       |       |   |
| GENE2087X | 18708_at   | 18708_at   | 1     | -0.24 | -0.26 | -0.4  | -0.03 | -2.28 | -1.87 | - |
|           | 0.67       | -2.18      | -1.89 |       |       |       |       |       |       |   |
| GENE2419X | 19972_at   | 19972_at   | 1     | 0.02  | -0.29 | -0.35 | 0.27  | -0.7  | -0.96 | - |
|           | 0.53       | -1.04      | -0.72 |       |       |       |       |       |       |   |
| GENE723X  | 14454_at   | 14454_at   | 1     | -0.21 | -0.42 | -0.72 | 0.03  | -1.2  | -1.92 | - |
|           | 0.9        | -1.58      | -1.62 |       |       |       |       |       |       |   |
| GENE873X  | 14912_at   | 14912_at   | 1     | -0.33 | -0.83 | -0.67 | 0.05  | -1.89 | -2.53 | - |
|           | 0.85       | -2.24      | -1.78 |       |       |       |       |       |       |   |
| GENE2511X | 20234_s_at | 20234_s_at | 1     | -0.06 | -0.37 | -0.55 | 0.06  | -1.06 | -0.71 | - |
|           | 0.52       | -1.55      | -0.94 |       |       |       |       |       |       |   |
| GENE1251X | 16005_at   | 16005_at   | 1     | -0.17 | -0.52 | -0.58 | -0.14 | -1.18 | -0.81 | - |
|           | 0.41       | -1.63      | -0.67 |       |       |       |       |       |       |   |

|           |            |            |       |       |       |       |       |       |       |    |
|-----------|------------|------------|-------|-------|-------|-------|-------|-------|-------|----|
| GENE1646X | 17286_at   | 17286_at   | 1     | -0.44 | -1.12 | -1.16 | -0.12 | -2.02 | -1.4  | -  |
|           | 0.82       | -2.47      | -1.37 |       |       |       |       |       |       |    |
| GENE1418X | 16460_s_at | 16460_s_at | 1     | -0.22 | -0.39 | -0.92 | -0.01 | -2.13 | -1.03 | -  |
|           | 0.79       | -1.64      | -1.11 |       |       |       |       |       |       |    |
| GENE2651X | 20638_at   | 20638_at   | 1     | -0.41 | -1.21 | -0.93 | 0.53  | -2.43 | -1.75 | -1 |
|           | -2.26      | -1.41      |       |       |       |       |       |       |       |    |
| GENE2014X | 18546_at   | 18546_at   | 1     | -0.48 | -0.76 | -0.7  | 0.13  | -1.37 | -1.09 | -  |
|           | 0.74       | -1.78      | -1.12 |       |       |       |       |       |       |    |
| GENE2567X | 20385_at   | 20385_at   | 1     | -0.67 | -1.21 | -1.25 | 0.29  | -2.28 | -1.89 | -  |
|           | 1.23       | -2.79      | -2.12 |       |       |       |       |       |       |    |
| GENE1110X | 15566_at   | 15566_at   | 1     | -0.95 | -1.32 | -1.54 | 1.26  | -2.43 | -1.94 | -  |
|           | 1.71       | -2.84      | -2.17 |       |       |       |       |       |       |    |
| GENE149X  | 12419_at   | 12419_at   | 1     | -0.07 | 0.02  | -0.18 | -0.63 | -1.06 | 0.22  | -  |
|           | 1.32       | -1.28      | -0.22 |       |       |       |       |       |       |    |
| GENE220X  | 12697_at   | 12697_at   | 1     | -0.02 | -0.37 | -0.26 | -0.57 | -0.78 | 0.12  | -  |
|           | 0.87       | -1.22      | -0.22 |       |       |       |       |       |       |    |
| GENE919X  | 15046_s_at | 15046_s_at | 1     | 0.09  | -0.21 | -0.17 | -0.39 | -1.33 | 0.55  | -  |
|           | 1.02       | -1.36      | -0.11 |       |       |       |       |       |       |    |
| GENE629X  | 14011_at   | 14011_at   | 1     | 0.09  | -0.2  | -0.8  | -0.77 | -1.77 | 0.38  | -  |
|           | 1.24       | -1.69      | -0.61 |       |       |       |       |       |       |    |
| GENE2606X | 20499_at   | 20499_at   | 1     | 0.22  | -0.4  | -0.52 | -0.08 | -0.87 | 0.19  | -  |
|           | 1.13       | -1.11      | -0.85 |       |       |       |       |       |       |    |
| GENE886X  | 14951_at   | 14951_at   | 1     | 0.23  | -0.55 | -0.47 | -0.45 | -1.29 | -0.17 | -  |
|           | 1.53       | -1.05      | -1.27 |       |       |       |       |       |       |    |
| GENE1849X | 17996_at   | 17996_at   | 1     | 0.54  | 0.54  | 0.31  | -0.35 | -1.18 | -0.64 | -  |
|           | 0.76       | -1.29      | -0.57 |       |       |       |       |       |       |    |
| GENE730X  | 14469_at   | 14469_at   | 1     | 0.56  | 0.69  | 0.35  | -0.61 | -1.92 | -1.64 | -  |
|           | 1.88       | -2.62      | -1.96 |       |       |       |       |       |       |    |
| GENE1464X | 16554_s_at | 16554_s_at | 1     | 0.09  | 0.4   | 0.86  | -0.41 | -1.19 | -0.47 | -  |
|           | 1.24       | -1.46      | -1.62 |       |       |       |       |       |       |    |
| GENE885X  | 14947_at   | 14947_at   | 1     | 0.46  | 1.03  | 1.13  | -0.62 | -1.07 | -1.04 | -  |
|           | 1.69       | -1.54      | -1.26 |       |       |       |       |       |       |    |
| GENE505X  | 13562_at   | 13562_at   | 1     | 0.63  | 0.61  | 0.56  | -0.55 | -0.79 | -0.53 | -  |
|           | 1.56       | -1.31      | -1.33 |       |       |       |       |       |       |    |
| GENE2561X | 20372_at   | 20372_at   | 1     | 1.02  | 1.69  | 1.3   | -0.69 | -1.72 | -1.89 | -  |
|           | 3.68       | -3.36      | -2.78 |       |       |       |       |       |       |    |
| GENE2250X | 19371_at   | 19371_at   | 1     | 0.64  | 0.22  | 0.55  | -0.8  | -0.83 | -1.08 | -  |
|           | 1.37       | -1.12      | -1.48 |       |       |       |       |       |       |    |
| GENE496X  | 13550_at   | 13550_at   | 1     | 0.18  | 0.34  | 1.04  | -1.86 | -1.84 | -2.44 | -  |
|           | 2.92       | -2.46      | -2.67 |       |       |       |       |       |       |    |
| GENE935X  | 15084_at   | 15084_at   | 1     | 0.13  | 0.43  | 0.18  | -1.18 | -2.05 | -0.78 | -  |
|           | 2.25       | -2.49      | -1.56 |       |       |       |       |       |       |    |
| GENE1836X | 17961_at   | 17961_at   | 1     | 0.21  | 0.23  | 0.53  | -0.91 | -1.29 | -0.56 | -  |
|           | 1.32       | -2.2       | -1.67 |       |       |       |       |       |       |    |
| GENE1947X | 18270_at   | 18270_at   | 1     | 0.33  | 0.62  | 0.69  | -0.95 | -1.35 | -0.24 | -  |
|           | 2.47       | -2.27      | -1.43 |       |       |       |       |       |       |    |
| GENE1799X | 17873_s_at | 17873_s_at | 1     | 0.03  | -0.39 | 0.16  | -0.51 | -0.92 | -0.86 | -  |
|           | 0.76       | -1.45      | -0.19 |       |       |       |       |       |       |    |
| GENE2018X | 18564_at   | 18564_at   | 1     | 0.01  | 0.01  | 0.14  | -0.36 | -1.36 | -0.52 | -  |
|           | 1.02       | -1.42      | -0.23 |       |       |       |       |       |       |    |
| GENE1949X | 18273_at   | 18273_at   | 1     | -0.15 | -0.27 | -0.2  | -0.35 | -0.75 | -0.23 | -  |
|           | 1.36       | -1.29      | -0.41 |       |       |       |       |       |       |    |
| GENE469X  | 13441_at   | 13441_at   | 1     | -0.09 | -0.12 | -0.18 | -0.33 | -0.94 | -0.46 | -  |
|           | 1.03       | -1.28      | -0.41 |       |       |       |       |       |       |    |
| GENE217X  | 12674_at   | 12674_at   | 1     | -0.11 | -0.27 | -0.35 | -0.67 | -1.17 | -0.61 | -  |
|           | 1.52       | -2.67      | -0.64 |       |       |       |       |       |       |    |



|           |            |            |       |       |       |       |       |       |       |   |
|-----------|------------|------------|-------|-------|-------|-------|-------|-------|-------|---|
| GENE934X  | 15083_at   | 15083_at   | 1     | 0.1   | -0.26 | -0.06 | -0.79 | -1.16 | -0.19 | - |
|           | 1.02       | -1.24      | -0.78 |       |       |       |       |       |       |   |
| GENE2209X | 19180_at   | 19180_at   | 1     | 0.09  | -0.1  | 0.14  | -1    | -1.61 | -0.13 | - |
|           | 1.61       | -1.86      | -0.91 |       |       |       |       |       |       |   |
| GENE2439X | 20018_at   | 20018_at   | 1     | -0.32 | 0.07  | 0     | -0.67 | -0.75 | -0.67 | - |
|           | 1.02       | -1.28      | -0.76 |       |       |       |       |       |       |   |
| GENE1826X | 17937_at   | 17937_at   | 1     | -0.47 | -0.14 | -0.12 | -0.46 | -1.06 | -0.78 | - |
|           | 1.32       | -1.59      | -0.78 |       |       |       |       |       |       |   |
| GENE1099X | 15534_f_at | 15534_f_at | 1     | -0.28 | -0.15 | -0.41 | -0.69 | -1.36 | -1    | - |
|           | 1.72       | -1.28      | -1.04 |       |       |       |       |       |       |   |
| GENE757X  | 14519_at   | 14519_at   | 1     | -0.24 | -0.11 | -0.28 | -0.65 | -1.67 | -0.87 | - |
|           | 1.29       | -1.44      | -1    |       |       |       |       |       |       |   |
| GENE2468X | 20117_at   | 20117_at   | 1     | 0.15  | -0.21 | -0.71 | -1.12 | -2.28 | -1.5  | - |
|           | 2.13       | -2.41      | -1.41 |       |       |       |       |       |       |   |
| GENE1119X | 15591_s_at | 15591_s_at | 1     | -0.06 | -0.25 | 0.09  | -0.46 | -1.2  | -1.06 | - |
|           | 1.62       | -1.39      | -1.28 |       |       |       |       |       |       |   |
| GENE2222X | 19211_at   | 19211_at   | 1     | -0.07 | -0.08 | 0.07  | -0.77 | -2.15 | -1.43 | - |
|           | 2.59       | -2.16      | -2.04 |       |       |       |       |       |       |   |
| GENE1601X | 17063_s_at | 17063_s_at | 1     | -0.29 | -0.19 | -0.38 | -0.19 | -0.66 | -0.71 | - |
|           | 0.86       | -1.03      | -0.84 |       |       |       |       |       |       |   |
| GENE522X  | 13598_at   | 13598_at   | 1     | -0.5  | -0.76 | -1.14 | -0.42 | -1.22 | -1.8  | - |
|           | 2.19       | -2.67      | -1.54 |       |       |       |       |       |       |   |
| GENE145X  | 12405_at   | 12405_at   | 1     | -0.04 | -0.5  | -0.87 | -0.07 | -1.39 | -1.33 | - |
|           | 1.92       | -1.76      | -1.48 |       |       |       |       |       |       |   |
| GENE1980X | 18339_at   | 18339_at   | 1     | 0.04  | -0.65 | -0.65 | -0.34 | -1.23 | -1.13 | - |
|           | 1.63       | -1.8       | -1.72 |       |       |       |       |       |       |   |
| GENE1299X | 16101_s_at | 16101_s_at | 1     | -0.22 | -0.62 | -0.75 | -0.56 | -1.59 | -0.73 | - |
|           | 1.8        | -1.77      | -1.22 |       |       |       |       |       |       |   |
| GENE1567X | 16975_at   | 16975_at   | 1     | -0.24 | -0.41 | -0.56 | -0.81 | -1.15 | -0.75 | - |
|           | 2.2        | -1.7       | -1.33 |       |       |       |       |       |       |   |
| GENE2290X | 19467_at   | 19467_at   | 1     | -0.69 | -0.97 | -1.06 | -0.91 | -2.5  | -1.28 | - |
|           | 3.97       | -3.97      | -2.6  |       |       |       |       |       |       |   |
| GENE961X  | 15126_s_at | 15126_s_at | 1     | -0.33 | -0.56 | -0.51 | -0.3  | -1.53 | -1.04 | - |
|           | 1.31       | -1.67      | -0.93 |       |       |       |       |       |       |   |
| GENE352X  | 13114_at   | 13114_at   | 1     | -0.35 | -0.7  | -0.79 | -0.89 | -3.78 | -2.78 | - |
|           | 2.5        | -3.5       | -2.58 |       |       |       |       |       |       |   |
| GENE1706X | 17468_at   | 17468_at   | 1     | -0.11 | -0.24 | -0.18 | -0.26 | -1.01 | -0.67 | - |
|           | 0.73       | -1.31      | -0.96 |       |       |       |       |       |       |   |
| GENE1545X | 16906_at   | 16906_at   | 1     | -0.29 | -0.38 | -0.39 | -0.36 | -1.19 | -0.82 | - |
|           | 1.01       | -1.69      | -1.05 |       |       |       |       |       |       |   |
| GENE2169X | 18984_at   | 18984_at   | 1     | -0.32 | -0.38 | -0.61 | -0.66 | -1.84 | -1.84 | - |
|           | 1.42       | -2.95      | -1.88 |       |       |       |       |       |       |   |
| GENE1686X | 17416_at   | 17416_at   | 1     | -0.33 | -0.34 | -0.24 | -0.17 | -1.56 | -1.27 | - |
|           | 1.74       | -2.07      | -1.42 |       |       |       |       |       |       |   |
| GENE371X  | 13143_at   | 13143_at   | 1     | -0.04 | -0.09 | -0.27 | -0.45 | -1.04 | -0.68 | - |
|           | 1.1        | -1.46      | -1.09 |       |       |       |       |       |       |   |
| GENE2548X | 20330_at   | 20330_at   | 1     | -0.67 | -0.67 | -0.75 | -1.32 | -2.58 | -2.58 | - |
|           | 3.17       | -3.65      | -3.39 |       |       |       |       |       |       |   |
| GENE954X  | 15111_s_at | 15111_s_at | 1     | -0.37 | -0.44 | -0.65 | -0.9  | -2.74 | -2.42 | - |
|           | 2.96       | -3.33      | -3.46 |       |       |       |       |       |       |   |
| GENE2179X | 19063_at   | 19063_at   | 1     | -0.7  | -0.53 | -1.11 | -1.42 | -3.74 | -3.25 | - |
|           | 4.15       | -4.42      | -4.42 |       |       |       |       |       |       |   |
| GENE2164X | 18975_g_at | 18975_g_at | 1     | 0.1   | -0.24 | -0.37 | -0.17 | -1.95 | -0.8  | - |
|           | 1.4        | -2.02      | -1.47 |       |       |       |       |       |       |   |
| GENE497X  | 13551_at   | 13551_at   | 1     | -0.15 | -0.3  | -0.45 | -0.33 | -1.11 | -0.59 | - |
|           | 1.06       | -1.49      | -1.42 |       |       |       |       |       |       |   |

|           |            |            |       |       |       |       |       |       |       |   |
|-----------|------------|------------|-------|-------|-------|-------|-------|-------|-------|---|
| GENE1944X | 18265_at   | 18265_at   | 1     | -0.78 | -0.95 | -1.19 | -0.97 | -3.51 | -2.02 | - |
|           | 3.54       | -4.19      | -3.83 |       |       |       |       |       |       |   |
| GENE1827X | 17938_at   | 17938_at   | 1     | 0.02  | -0.2  | -0.44 | -0.75 | -1.09 | -1.09 | - |
|           | 1.48       | -0.67      | -0.99 |       |       |       |       |       |       |   |
| GENE1829X | 17944_at   | 17944_at   | 1     | -0.05 | -0.05 | -0.44 | -0.59 | -0.84 | -1.27 | - |
|           | 1.37       | -0.89      | -1.05 |       |       |       |       |       |       |   |
| GENE1274X | 16052_at   | 16052_at   | 1     | -0.75 | -0.14 | -0.56 | -0.78 | -1.53 | -1.09 | - |
|           | 1.86       | -1.36      | -1.81 |       |       |       |       |       |       |   |
| GENE1029X | 15343_at   | 15343_at   | 1     | -0.36 | -0.33 | -0.78 | -0.72 | -0.82 | -0.79 | - |
|           | 1.71       | -1.15      | -1.54 |       |       |       |       |       |       |   |
| GENE398X  | 13192_at   | 13192_at   | 1     | -1.24 | -0.96 | -1.24 | -2.1  | -2.32 | -2.1  | - |
|           | 3.78       | -2.4       | -3.78 |       |       |       |       |       |       |   |
| GENE1685X | 17415_at   | 17415_at   | 1     | -0.1  | 0.02  | -0.16 | -0.34 | -0.53 | -0.24 | - |
|           | 0.91       | -1.27      | -0.78 |       |       |       |       |       |       |   |
| GENE151X  | 12422_at   | 12422_at   | 1     | 0.04  | 0     | 0     | -0.44 | -0.32 | -0.32 | - |
|           | 1.29       | -1.17      | -0.89 |       |       |       |       |       |       |   |
| GENE1013X | 15215_s_at | 15215_s_at | 1     | -0.08 | -0.13 | -0.07 | -0.43 | -0.47 | 0.04  | - |
|           | 1.17       | -0.87      | -0.86 |       |       |       |       |       |       |   |
| GENE378X  | 13155_i_at | 13155_i_at | 1     | -0.18 | -0.33 | -0.15 | -0.61 | -0.29 | -0.54 | - |
|           | 1.05       | -0.84      | -0.89 |       |       |       |       |       |       |   |
| GENE1443X | 16513_at   | 16513_at   | 1     | -0.6  | -0.32 | -0.37 | -0.55 | -0.63 | -1.1  | - |
|           | 1.84       | -1.66      | -1.61 |       |       |       |       |       |       |   |
| GENE1727X | 17525_at   | 17525_at   | 1     | -0.19 | -0.33 | 0.11  | -2.13 | -1.65 | -2.13 | - |
|           | 3.58       | -3.58      | -3.58 |       |       |       |       |       |       |   |
| GENE2054X | 18637_at   | 18637_at   | 1     | -0.04 | 0     | -0.91 | -2.19 | -2.41 | -2.41 | - |
|           | 4.32       | -3.73      | -4.1  |       |       |       |       |       |       |   |
| GENE1405X | 16438_at   | 16438_at   | 1     | -0.2  | -0.51 | -0.7  | -1.61 | -2.77 | -2.56 | - |
|           | 5.3        | -5.01      | -5.15 |       |       |       |       |       |       |   |
| GENE1412X | 16453_s_at | 16453_s_at | 1     | -0.1  | -0.11 | -0.53 | -0.85 | -0.61 | -1.47 | - |
|           | 1.05       | -0.7       | -0.11 |       |       |       |       |       |       |   |
| GENE1682X | 17409_at   | 17409_at   | 1     | 0.13  | 0.07  | 0.01  | -0.53 | -0.72 | -0.81 | - |
|           | 1.34       | -0.32      | -0.23 |       |       |       |       |       |       |   |
| GENE2218X | 19199_at   | 19199_at   | 1     | -0.41 | -0.05 | -0.03 | -1.41 | -0.76 | -0.98 | - |
|           | 1.57       | -0.79      | -0.88 |       |       |       |       |       |       |   |
| GENE1069X | 15469_at   | 15469_at   | 1     | -0.28 | 0.09  | -0.04 | -1.03 | -1    | -0.97 | - |
|           | 1.22       | -0.86      | -0.45 |       |       |       |       |       |       |   |
| GENE327X  | 13027_at   | 13027_at   | 1     | 0     | 0.12  | -0.09 | -1.21 | -1.45 | -1    | - |
|           | 1.58       | -1.1       | -0.86 |       |       |       |       |       |       |   |
| GENE2064X | 18664_at   | 18664_at   | 1     | -0.25 | 0.11  | -0.16 | -2.89 | -2.64 | -2.64 | - |
|           | 3.01       | -2.6       | -2.51 |       |       |       |       |       |       |   |
| GENE2106X | 18761_at   | 18761_at   | 1     | 0.19  | 0.11  | 0.05  | -1.63 | -1.27 | -0.98 | - |
|           | 2.38       | -1.73      | -1.04 |       |       |       |       |       |       |   |
| GENE295X  | 12926_s_at | 12926_s_at | 1     | 0.12  | -0.21 | 0.34  | -1.73 | -1.58 | -2    | - |
|           | 2.35       | -1.88      | -1.43 |       |       |       |       |       |       |   |
| GENE655X  | 14064_at   | 14064_at   | 1     | -0.78 | -0.78 | -0.07 | -3.48 | -3.06 | -2.06 | - |
|           | 3.5        | -3.5       | -2.08 |       |       |       |       |       |       |   |
| GENE2162X | 18969_g_at | 18969_g_at | 1     | -0.26 | -0.26 | -0.26 | -3.29 | -2.71 | -2.18 | - |
|           | 2.56       | -3.35      | -2.13 |       |       |       |       |       |       |   |
| GENE2161X | 18968_at   | 18968_at   | 1     | 0     | 0     | 0     | -3.7  | -3.7  | -2.02 | - |
|           | 3.15       | -4.24      | -2.24 |       |       |       |       |       |       |   |
| GENE2424X | 19987_at   | 19987_at   | 1     | -0.58 | -0.23 | 0.16  | -0.71 | -1.35 | -0.56 | - |
|           | 0.48       | -0.65      | -0.58 |       |       |       |       |       |       |   |
| GENE481X  | 13514_s_at | 13514_s_at | 1     | -0.18 | -0.23 | -0.45 | -0.61 | -1.41 | -0.46 | - |
|           | 1.09       | -0.91      | -0.14 |       |       |       |       |       |       |   |
| GENE2379X | 19880_at   | 19880_at   | 1     | 0.1   | -0.16 | -0.75 | -1.35 | -2.78 | -1.93 | - |
|           | 1.38       | -1         | -0.83 |       |       |       |       |       |       |   |

|           |            |            |       |         |       |       |       |       |       |   |
|-----------|------------|------------|-------|---------|-------|-------|-------|-------|-------|---|
| GENE2493X | 20190_at   | 20190_at   | 1     | -0.13   | -0.4  | -0.83 | -1.56 | -2.26 | -1.23 | - |
|           | 1.57       | -1.75      | -0.84 |         |       |       |       |       |       |   |
| GENE1869X | 18031_r_at | 18031_r_at | 1     | 0.16    | -0.61 | -0.79 | -1.73 | -2.37 | -1.56 | - |
|           | 1.26       | -1.7       | -1.11 |         |       |       |       |       |       |   |
| GENE1400X | 16422_at   | 16422_at   | 1     | -0.47   | -0.33 | -0.05 | -0.44 | -1.24 | -0.92 | - |
|           | 1.08       | -0.9       | -0.46 |         |       |       |       |       |       |   |
| GENE1076X | 15481_at   | 15481_at   | 1     | -0.58   | -1.17 | -0.99 | -1.39 | -2.7  | -1.37 | - |
|           | 1.84       | -1.54      | -1.17 |         |       |       |       |       |       |   |
| GENE66X   | 12169_i_at | 12169_i_at | 1     | -1.31   | -1.7  | -1.8  | -1.64 | -4.2  | -2.67 | - |
|           | 2.16       | -3.09      | -2.02 |         |       |       |       |       |       |   |
| GENE115X  | 12300_at   | 12300_at   | 1     | -0.76   | -1.11 | -1.11 | -1.51 | -2.56 | -1.3  | - |
|           | 2.75       | -2.1       | -0.97 |         |       |       |       |       |       |   |
| GENE14X   | 12020_at   | 12020_at   | 1     | -0.34   | -0.46 | -0.6  | -0.58 | -0.96 | -0.79 | - |
|           | 1.12       | -1.23      | -0.59 |         |       |       |       |       |       |   |
| GENE1708X | 17475_at   | 17475_at   | 1     | -0.58   | -0.89 | -0.7  | -0.99 | -1.2  | -1.28 | - |
|           | 1.82       | -1.38      | -0.94 |         |       |       |       |       |       |   |
| GENE1797X | 17863_at   | 17863_at   | 1     | -0.14   | -1.18 | -0.1  | -0.38 | -1.18 | -1    | - |
|           | 1.02       | -1.42      | -0.81 |         |       |       |       |       |       |   |
| GENE1868X | 18030_i_at | 18030_i_at | 1     | 0.11    | -0.64 | -0.59 | -1.54 | -2.74 | -1.74 | - |
|           | 1.53       | -2.37      | -1.7  |         |       |       |       |       |       |   |
| GENE509X  | 13567_at   | 13567_at   | 1     | 0.00449 |       | -0.31 | -0.49 | -0.67 | -2.12 | - |
|           | 1.27       | -0.79      | -2.18 | -1.57   |       |       |       |       |       |   |
| GENE2254X | 19379_at   | 19379_at   | 1     | 0.11    | -0.44 | -0.21 | -0.37 | -1.08 | -1.01 | - |
|           | 0.53       | -1.08      | -0.61 |         |       |       |       |       |       |   |
| GENE661X  | 14072_at   | 14072_at   | 1     | -0.07   | -0.45 | -0.56 | -0.9  | -1.29 | -1.31 | - |
|           | 1.33       | -1.57      | -1.09 |         |       |       |       |       |       |   |
| GENE1254X | 16014_at   | 16014_at   | 1     | -0.24   | -0.49 | -0.66 | -1    | -1.73 | -1.42 | - |
|           | 1.73       | -1.79      | -1.27 |         |       |       |       |       |       |   |
| GENE2044X | 18616_at   | 18616_at   | 1     | 0.1     | -0.37 | -0.49 | -0.69 | -0.99 | -1.01 | - |
|           | 0.97       | -1.2       | -1.14 |         |       |       |       |       |       |   |
| GENE2227X | 19224_at   | 19224_at   | 1     | -0.09   | -0.16 | -0.37 | -0.37 | -0.9  | -0.9  | - |
|           | 0.84       | -1.2       | -1    |         |       |       |       |       |       |   |
| GENE2546X | 20317_at   | 20317_at   | 1     | -0.29   | -0.47 | -1.14 | -1.03 | -2.39 | -2.48 | - |
|           | 2.3        | -2.7       | -2.53 |         |       |       |       |       |       |   |
| GENE498X  | 13553_at   | 13553_at   | 1     | -0.38   | -0.6  | -0.6  | -0.9  | -1.42 | -1.45 | - |
|           | 1.5        | -1.77      | -1.7  |         |       |       |       |       |       |   |
| GENE1795X | 17861_at   | 17861_at   | 1     | -0.51   | -0.94 | -1.09 | -0.89 | -2.37 | -2.33 | - |
|           | 2.34       | -3.02      | -2.63 |         |       |       |       |       |       |   |
| GENE57X   | 12143_at   | 12143_at   | 1     | 0.05    | -0.63 | -0.53 | -0.14 | -1.71 | -1.31 | - |
|           | 0.73       | -1.54      | -1.22 |         |       |       |       |       |       |   |
| GENE128X  | 12338_at   | 12338_at   | 1     | -0.41   | -1.13 | -1.19 | -0.61 | -3.02 | -2.52 | - |
|           | 1.06       | -2.2       | -2.05 |         |       |       |       |       |       |   |
| GENE27X   | 12054_at   | 12054_at   | 1     | -0.28   | -0.95 | -0.83 | -0.35 | -1.86 | -1.42 | - |
|           | 0.92       | -1.38      | -1.25 |         |       |       |       |       |       |   |
| GENE2098X | 18742_f_at | 18742_f_at | 1     | -0.49   | -1.59 | -1.83 | -0.26 | -3.17 | -2.82 | - |
|           | 1.31       | -2.52      | -2.36 |         |       |       |       |       |       |   |
| GENE1410X | 16451_at   | 16451_at   | 1     | -0.09   | -0.59 | -0.52 | -0.48 | -1.15 | -0.97 | - |
|           | 0.5        | -1.29      | -0.91 |         |       |       |       |       |       |   |
| GENE937X  | 15087_at   | 15087_at   | 1     | -0.4    | -0.78 | -0.74 | -0.65 | -1.81 | -1.46 | - |
|           | 0.65       | -1.81      | -1.61 |         |       |       |       |       |       |   |
| GENE1610X | 17095_s_at | 17095_s_at | 1     | -0.49   | -0.89 | -1.03 | -0.51 | -2.4  | -1.8  | - |
|           | 0.78       | -2.42      | -1.74 |         |       |       |       |       |       |   |
| GENE1993X | 18431_at   | 18431_at   | 1     | -0.9    | -1.34 | -1.44 | -0.78 | -3.63 | -2.78 | - |
|           | 1.5        | -3.76      | -2.76 |         |       |       |       |       |       |   |
| GENE2458X | 20066_at   | 20066_at   | 1     | -0.33   | -0.92 | -1.07 | -0.31 | -1.63 | -1.4  | - |
|           | 0.87       | -2.13      | -1.61 |         |       |       |       |       |       |   |

|           |            |            |       |       |       |       |       |       |       |   |
|-----------|------------|------------|-------|-------|-------|-------|-------|-------|-------|---|
| GENE208X  | 12614_at   | 12614_at   | 1     | -0.55 | -1.23 | -1.52 | -0.67 | -2.56 | -2.29 | - |
|           | 0.97       | -3.29      | -2.61 |       |       |       |       |       |       |   |
| GENE1745X | 17573_at   | 17573_at   | 1     | -0.39 | -0.63 | -0.95 | -0.98 | -2.18 | -1.58 | - |
|           | 1.7        | -2.17      | -1.73 |       |       |       |       |       |       |   |
| GENE2128X | 18890_at   | 18890_at   | 1     | -0.36 | -1    | -1.94 | -1.19 | -3.15 | -2.77 | - |
|           | 2.53       | -2.97      | -3.08 |       |       |       |       |       |       |   |
| GENE858X  | 14859_s_at | 14859_s_at | 1     | -0.36 | -0.9  | -0.95 | -0.78 | -2.06 | -1.97 | - |
|           | 1.58       | -2.11      | -1.82 |       |       |       |       |       |       |   |
| GENE688X  | 14269_at   | 14269_at   | 1     | -0.33 | -0.51 | -0.83 | -0.76 | -1.77 | -1.79 | - |
|           | 1.32       | -2.15      | -1.92 |       |       |       |       |       |       |   |
| GENE513X  | 13573_at   | 13573_at   | 1     | -0.36 | -1.09 | -1.32 | -1.05 | -2.92 | -2.63 | - |
|           | 2.07       | -3         | -3.05 |       |       |       |       |       |       |   |
| GENE24X   | 12048_at   | 12048_at   | 1     | -0.49 | -1.18 | -1.81 | -1.19 | -3.83 | -3.29 | - |
|           | 2.34       | -3.79      | -3.79 |       |       |       |       |       |       |   |
| GENE2675X | 20704_at   | 20704_at   | 1     | -0.39 | -0.84 | -1.4  | -1.24 | -2.4  | -2.75 | - |
|           | 1.54       | -2.38      | -2.47 |       |       |       |       |       |       |   |
| GENE2186X | 19117_s_at | 19117_s_at | 1     | -0.25 | -0.64 | -0.68 | -0.74 | -1.45 | -1.36 | - |
|           | 0.76       | -1.28      | -1.48 |       |       |       |       |       |       |   |
| GENE1398X | 16416_at   | 16416_at   | 1     | -0.23 | -0.67 | -0.61 | -0.58 | -1.57 | -1.52 | - |
|           | 0.77       | -1.28      | -1.35 |       |       |       |       |       |       |   |
| GENE2057X | 18644_at   | 18644_at   | 1     | -0.39 | -1.08 | -1.12 | -0.92 | -2.47 | -2.33 | - |
|           | 1.06       | -2.33      | -2.06 |       |       |       |       |       |       |   |
| GENE2230X | 19231_at   | 19231_at   | 1     | -0.4  | -1.18 | -1.43 | -1.09 | -2.49 | -2.49 | - |
|           | 1.24       | -2.15      | -2.15 |       |       |       |       |       |       |   |
| GENE1798X | 17865_at   | 17865_at   | 1     | -0.25 | -1.01 | -0.82 | -1.06 | -2.13 | -2.16 | - |
|           | 1.6        | -1.8       | -2.2  |       |       |       |       |       |       |   |
| GENE1824X | 17931_at   | 17931_at   | 1     | -0.56 | -0.91 | -0.92 | -0.69 | -2.16 | -2.08 | - |
|           | 1.44       | -1.85      | -1.97 |       |       |       |       |       |       |   |
| GENE1816X | 17913_at   | 17913_at   | 1     | -0.5  | -0.86 | -0.98 | -0.66 | -2.55 | -2.18 | - |
|           | 1.64       | -2.22      | -2.3  |       |       |       |       |       |       |   |
| GENE540X  | 13629_s_at | 13629_s_at | 1     | -0.65 | -0.73 | -0.95 | -0.73 | -2.67 | -2.54 | - |
|           | 1.8        | -2.13      | -2.24 |       |       |       |       |       |       |   |
| GENE120X  | 12313_g_at | 12313_g_at | 1     | -0.39 | -0.9  | -1.45 | -0.76 | -2.83 | -2.99 | - |
|           | 1.95       | -2.35      | -2.67 |       |       |       |       |       |       |   |
| GENE2008X | 18521_at   | 18521_at   | 1     | -0.41 | -0.57 | -0.88 | -0.5  | -1.24 | -1.18 | - |
|           | 0.64       | -1.13      | -1.3  |       |       |       |       |       |       |   |
| GENE1350X | 16260_at   | 16260_at   | 1     | -0.43 | -0.47 | -0.72 | -0.46 | -1.38 | -1.33 | - |
|           | 0.65       | -1.24      | -1.19 |       |       |       |       |       |       |   |
| GENE679X  | 14124_s_at | 14124_s_at | 1     | -0.82 | -1.01 | -1.46 | -0.63 | -2.51 | -2.05 | - |
|           | 0.9        | -2.24      | -2.24 |       |       |       |       |       |       |   |
| GENE2232X | 19245_at   | 19245_at   | 1     | -1    | -1    | -1.3  | -1.61 | -3.37 | -2.11 | - |
|           | 1.17       | -2.61      | -3.1  |       |       |       |       |       |       |   |
| GENE1551X | 16921_at   | 16921_at   | 1     | -0.21 | -0.53 | -0.59 | -0.77 | -1.36 | -1.51 | - |
|           | 1.4        | -0.96      | -1.1  |       |       |       |       |       |       |   |
| GENE1416X | 16458_s_at | 16458_s_at | 1     | -0.28 | -0.41 | -0.51 | -0.69 | -1.3  | -1.26 | - |
|           | 1.57       | -1.34      | -1.13 |       |       |       |       |       |       |   |
| GENE1173X | 15737_at   | 15737_at   | 1     | -0.64 | -1.42 | -1.37 | -1.85 | -3.44 | -3.07 | - |
|           | 3.95       | -3.36      | -3.36 |       |       |       |       |       |       |   |
| GENE119X  | 12312_at   | 12312_at   | 1     | -0.39 | -1    | -1.53 | -1.04 | -3.3  | -3.47 | - |
|           | 3.78       | -3.3       | -3.1  |       |       |       |       |       |       |   |
| GENE2255X | 19381_at   | 19381_at   | 1     | -0.72 | -0.85 | -1.34 | -1.02 | -2.5  | -1.86 | - |
|           | 2.03       | -1.49      | -2.03 |       |       |       |       |       |       |   |
| GENE2174X | 19017_at   | 19017_at   | 1     | -1.43 | -2.56 | -2.75 | -2.06 | -4.02 | -3.87 | - |
|           | 3.55       | -3.7       | -4.14 |       |       |       |       |       |       |   |
| GENE2010X | 18533_at   | 18533_at   | 1     | -1.53 | -1.93 | -2.37 | -1.64 | -3.93 | -3.02 | - |
|           | 3.85       | -3.26      | -4.17 |       |       |       |       |       |       |   |

|           |            |            |       |       |       |       |       |       |       |   |
|-----------|------------|------------|-------|-------|-------|-------|-------|-------|-------|---|
| GENE2137X | 18924_at   | 18924_at   | 1     | -0.55 | -1.4  | -1.08 | -1.17 | -2.17 | -2.43 | - |
|           | 1.79       | -1.86      | -1.38 |       |       |       |       |       |       |   |
| GENE504X  | 13561_at   | 13561_at   | 1     | -0.64 | -1.22 | -1.32 | -0.63 | -2.6  | -2.48 | - |
|           | 1.64       | -2.37      | -1.47 |       |       |       |       |       |       |   |
| GENE1476X | 16593_at   | 16593_at   | 1     | -0.9  | -1.98 | -2.32 | -1.79 | -4.64 | -3.96 | - |
|           | 2.59       | -3.26      | -3.14 |       |       |       |       |       |       |   |
| GENE1034X | 15368_at   | 15368_at   | 1     | -0.19 | -0.34 | -0.92 | -0.74 | -1.54 | -1.56 | - |
|           | 1.09       | -1.4       | -1.06 |       |       |       |       |       |       |   |
| GENE2020X | 18566_s_at | 18566_s_at | 1     | -0.03 | -0.55 | -0.73 | -0.45 | -1.4  | -1.41 | - |
|           | 0.92       | -1.09      | -1.02 |       |       |       |       |       |       |   |
| GENE2338X | 19695_at   | 19695_at   | 1     | -0.19 | -2    | -2.95 | -1.62 | -5.11 | -5.11 | - |
|           | 4.26       | -4.26      | -4.26 |       |       |       |       |       |       |   |
| GENE656X  | 14066_at   | 14066_at   | 1     | -0.68 | -0.62 | -0.62 | -1.19 | -2.54 | -1.9  | - |
|           | 1.83       | -2.41      | -2.36 |       |       |       |       |       |       |   |
| GENE1422X | 16477_at   | 16477_at   | 1     | -0.75 | -0.81 | -0.86 | -1.09 | -2.52 | -2.22 | - |
|           | 1.84       | -2.23      | -2.43 |       |       |       |       |       |       |   |
| GENE341X  | 13086_r_at | 13086_r_at | 1     | -0.79 | -0.38 | -0.4  | -0.79 | -3.22 | -2.91 | - |
|           | 2.28       | -2.28      | -3.12 |       |       |       |       |       |       |   |
| GENE762X  | 14531_at   | 14531_at   | 1     | -0.51 | -0.87 | -0.79 | -0.15 | -1.89 | -1.64 | - |
|           | 1.18       | -1.39      | -1.47 |       |       |       |       |       |       |   |
| GENE340X  | 13085_i_at | 13085_i_at | 1     | -1.37 | -1.09 | -1.02 | -0.3  | -3.08 | -2.76 | - |
|           | 1.89       | -2.15      | -2.6  |       |       |       |       |       |       |   |
| GENE1387X | 16374_s_at | 16374_s_at | 1     | 0     | 0     | 0     | 0     | 0     | 3.37  | 0 |
|           | 0          | 3.13       |       |       |       |       |       |       |       |   |
| GENE2151X | 18950_at   | 18950_at   | 1     | 0.3   | -0.15 | -0.33 | 0.05  | -0.29 | 0.93  |   |
|           | 0.42       | -0.13      | 1.04  |       |       |       |       |       |       |   |
| GENE408X  | 13225_s_at | 13225_s_at | 1     | -0.49 | -0.33 | -0.19 | 0.24  | -0.33 | 1.17  |   |
|           | 0.89       | 0.31       | 1.76  |       |       |       |       |       |       |   |
| GENE924X  | 15058_s_at | 15058_s_at | 1     | -0.53 | -0.51 | -0.43 | 0.24  | 0.11  | 1.41  |   |
|           | 0.73       | 0.73       | 1.84  |       |       |       |       |       |       |   |
| GENE414X  | 13242_at   | 13242_at   | 1     | -0.35 | -0.2  | -0.31 | 0.09  | 0.16  | 0.98  |   |
|           | 0.81       | 0.65       | 1.65  |       |       |       |       |       |       |   |
| GENE946X  | 15098_s_at | 15098_s_at | 1     | -0.35 | -1.17 | -1.7  | 0.91  | -0.1  | 1.2   | - |
|           | 0.1        | 0.42       | 2.04  |       |       |       |       |       |       |   |
| GENE1370X | 16334_s_at | 16334_s_at | 1     | -0.02 | -0.48 | -0.77 | -0.03 | 0.1   | 1.06  |   |
|           | 0.02       | 0.52       | 1.27  |       |       |       |       |       |       |   |
| GENE2011X | 18536_at   | 18536_at   | 1     | 0.14  | -0.33 | -1.33 | 0.29  | -0.55 | 1.11  |   |
|           | 0.52       | 0.17       | 0.78  |       |       |       |       |       |       |   |
| GENE749X  | 14504_s_at | 14504_s_at | 1     | -1.13 | -1.13 | -0.87 | 1.37  | 0.26  | 2.63  |   |
|           | 0.58       | 0.66       | 2.08  |       |       |       |       |       |       |   |
| GENE745X  | 14495_at   | 14495_at   | 1     | -0.07 | -0.63 | -0.74 | 0.42  | 0.62  | 1.45  |   |
|           | 0.48       | 0.51       | 1     |       |       |       |       |       |       |   |
| GENE1765X | 17636_at   | 17636_at   | 1     | -0.71 | -0.71 | -0.94 | 0.54  | 0.72  | 1.52  |   |
|           | 0.55       | 0.39       | 0.83  |       |       |       |       |       |       |   |
| GENE1159X | 15670_s_at | 15670_s_at | 1     | -0.66 | -0.9  | -0.9  | 0.53  | 0.14  | 1.16  | - |
|           | 0.21       | -0.27      | 0.69  |       |       |       |       |       |       |   |
| GENE2661X | 20658_s_at | 20658_s_at | 1     | -0.39 | -0.65 | -0.75 | 0.04  | -0.12 | 1.13  |   |
|           | 0.1        | 0.32       | 0.48  |       |       |       |       |       |       |   |
| GENE2527X | 20271_at   | 20271_at   | 1     | -0.85 | -2.05 | -2.53 | -0.54 | -0.22 | 0.72  |   |
|           | 0.38       | 1.85       | 2.2   |       |       |       |       |       |       |   |
| GENE1371X | 16335_at   | 16335_at   | 1     | -0.36 | -0.81 | -0.96 | -0.3  | -0.2  | 0.65  |   |
|           | 0.09       | 0.42       | 1.23  |       |       |       |       |       |       |   |
| GENE732X  | 14475_at   | 14475_at   | 1     | -0.52 | -1.08 | -1.26 | 0     | -0.86 | 1.36  |   |
|           | 0.82       | 1.46       | 2.39  |       |       |       |       |       |       |   |
| GENE1837X | 17962_at   | 17962_at   | 1     | -0.52 | -0.74 | -0.58 | 0.18  | -0.17 | 0.68  |   |
|           | 0.18       | 0.47       | 1.05  |       |       |       |       |       |       |   |



|           |            |            |       |       |       |       |       |       |       |   |
|-----------|------------|------------|-------|-------|-------|-------|-------|-------|-------|---|
| GENE78X   | 12193_at   | 12193_at   | 1     | -0.89 | -0.93 | -1.02 | -0.28 | -0.53 | -0.15 |   |
|           | 0.66       | 0.62       | 0.39  |       |       |       |       |       |       |   |
| GENE88X   | 12226_at   | 12226_at   | 1     | -0.78 | -1.4  | -1.7  | 0.09  | 0.13  | -0.71 |   |
|           | 0.8        | 1.05       | 1.07  |       |       |       |       |       |       |   |
| GENE799X  | 14624_at   | 14624_at   | 1     | -0.45 | -0.9  | -1.3  | 0.13  | -0.22 | -0.38 |   |
|           | 0.55       | 0.6        | 0.12  |       |       |       |       |       |       |   |
| GENE2007X | 18512_at   | 18512_at   | 1     | -1.03 | -1.56 | -1.24 | -0.19 | 0.28  | 0.04  | - |
|           | 0.04       | 0.51       | 0.37  |       |       |       |       |       |       |   |
| GENE842X  | 14735_s_at | 14735_s_at | 1     | -0.6  | -1.04 | -0.9  | 0.26  | 0.33  | 0.32  |   |
|           | 0.33       | 0.4        | 0.05  |       |       |       |       |       |       |   |
| GENE279X  | 12857_at   | 12857_at   | 1     | -0.81 | -0.9  | -1.36 | -0.26 | 0.22  | 0.06  |   |
|           | 0.44       | 0.49       | -0.06 |       |       |       |       |       |       |   |
| GENE1382X | 16358_s_at | 16358_s_at | 1     | 0.28  | -0.14 | -0.47 | 0.13  | 1.43  | 0     |   |
|           | 0.62       | 0.86       | 0.12  |       |       |       |       |       |       |   |
| GENE1329X | 16168_s_at | 16168_s_at | 1     | -0.06 | 0.12  | 0.1   | 0.36  | 1.68  | 0.27  |   |
|           | 0.58       | 1.53       | 0.14  |       |       |       |       |       |       |   |
| GENE2354X | 19763_at   | 19763_at   | 1     | 0     | 0     | 0     | 0     | 3.48  | 0     |   |
|           | 0.48       | 3.1        | 0     |       |       |       |       |       |       |   |
| GENE2467X | 20104_at   | 20104_at   | 1     | 0     | 0     | 0     | -0.26 | 3.82  | -0.26 | 1 |
|           | 3.48       | 0          |       |       |       |       |       |       |       |   |
| GENE1171X | 15697_at   | 15697_at   | 1     | 0     | 0.58  | -0.26 | -0.67 | 2.7   | -0.19 | 0 |
|           | 3.07       | 0          |       |       |       |       |       |       |       |   |
| GENE774X  | 14554_at   | 14554_at   | 1     | -0.37 | 0.31  | -0.07 | -0.11 | 1.45  | 0.32  | - |
|           | 0.47       | 1.48       | -0.05 |       |       |       |       |       |       |   |
| GENE2472X | 20138_at   | 20138_at   | 1     | -0.31 | -0.11 | -0.56 | -0.43 | 1.18  | -0.16 |   |
|           | 0.01       | 1.09       | 0.08  |       |       |       |       |       |       |   |
| GENE2627X | 20570_at   | 20570_at   | 1     | -0.32 | -0.32 | -0.73 | -0.37 | 1.34  | -0.53 | - |
|           | 0.28       | 1.54       | -0.21 |       |       |       |       |       |       |   |
| GENE1772X | 17698_at   | 17698_at   | 1     | -1    | -0.41 | -0.26 | 0.06  | 1.21  | 0.24  |   |
|           | 0.53       | 1.8        | -0.46 |       |       |       |       |       |       |   |
| GENE84X   | 12216_at   | 12216_at   | 1     | -0.36 | -1.17 | -0.71 | -0.28 | 0.81  | 0.23  |   |
|           | 1.29       | 1.44       | 0.49  |       |       |       |       |       |       |   |
| GENE1752X | 17583_s_at | 17583_s_at | 1     | -0.87 | -0.76 | -0.82 | -0.67 | 1.03  | -0.57 |   |
|           | 0.97       | 1.27       | 0.13  |       |       |       |       |       |       |   |
| GENE2082X | 18692_at   | 18692_at   | 1     | -0.49 | -0.63 | -0.55 | -0.16 | -0.02 | -0.43 | - |
|           | 0.06       | 1.17       | 0.23  |       |       |       |       |       |       |   |
| GENE1617X | 17109_s_at | 17109_s_at | 1     | -0.56 | -0.8  | -0.82 | -0.18 | 0.45  | -0.9  |   |
|           | 0.26       | 1.47       | -0.58 |       |       |       |       |       |       |   |
| GENE951X  | 15107_s_at | 15107_s_at | 1     | 0.84  | 0.72  | -2.53 | -2.48 | 0.55  | -0.48 |   |
|           | 1.07       | 2.32       | 1.65  |       |       |       |       |       |       |   |
| GENE729X  | 14468_at   | 14468_at   | 1     | -0.64 | 0.32  | -0.16 | -1.05 | 0.43  | 0.24  |   |
|           | 0.38       | 0.54       | -0.11 |       |       |       |       |       |       |   |
| GENE573X  | 13705_at   | 13705_at   | 1     | -0.46 | -0.19 | 0.08  | -0.71 | -1.35 | -0.57 |   |
|           | 1.18       | 0.54       | 1.06  |       |       |       |       |       |       |   |
| GENE622X  | 13967_at   | 13967_at   | 1     | 0.11  | 0.62  | 0.48  | -0.33 | -1.02 | -1.33 |   |
|           | 0.68       | 0.89       | 1.02  |       |       |       |       |       |       |   |
| GENE141X  | 12374_i_at | 12374_i_at | 1     | -0.09 | 0.72  | 1.2   | -1.03 | -1.1  | -0.74 |   |
|           | 1.38       | 1.12       | 1.21  |       |       |       |       |       |       |   |
| GENE142X  | 12375_s_at | 12375_s_at | 1     | -0.51 | 0.52  | 1.05  | -0.81 | -1.17 | -0.81 |   |
|           | 0.59       | 0.31       | 0.84  |       |       |       |       |       |       |   |
| GENE226X  | 12726_f_at | 12726_f_at | 1     | -0.93 | 0.43  | 1.33  | -1.38 | -2.02 | -1.23 |   |
|           | 1.66       | 1.19       | 0.77  |       |       |       |       |       |       |   |
| GENE332X  | 13056_at   | 13056_at   | 1     | 0.5   | 0.39  | 0.44  | -1.18 | -0.19 | -0.52 |   |
|           | 0.45       | 0.85       | 0.49  |       |       |       |       |       |       |   |
| GENE439X  | 13290_at   | 13290_at   | 1     | -0.04 | 0.15  | 0.36  | -1.03 | -0.22 | -0.44 |   |
|           | 0.22       | 0.44       | 0.03  |       |       |       |       |       |       |   |

|           |            |            |   |       |       |       |       |       |       |
|-----------|------------|------------|---|-------|-------|-------|-------|-------|-------|
| GENE2559X | 20362_at   | 20362_at   | 1 | 0.61  | 0.42  | 0.21  | -0.4  | -0.83 | -0.11 |
| 3.11      | 2.26       | 2.62       |   |       |       |       |       |       |       |
| GENE97X   | 12240_at   | 12240_at   | 1 | 0.48  | 0     | 0.84  | 0.83  | -0.34 | -0.16 |
| 3.9       | 2.05       | 2.58       |   |       |       |       |       |       |       |
| GENE1790X | 17843_s_at | 17843_s_at | 1 | 0.58  | 0.37  | 0.13  | 1.07  | -0.84 | -1.84 |
| 3.94      | 2.63       | 2          |   |       |       |       |       |       |       |
| GENE2400X | 19927_at   | 19927_at   | 1 | -0.22 | -0.14 | -0.1  | -0.31 | -0.36 | -0.12 |
| 1.07      | 0.64       | -0.08      |   |       |       |       |       |       |       |
| GENE862X  | 14874_at   | 14874_at   | 1 | -0.63 | -0.71 | -1.1  | -0.09 | -1.58 | -1.58 |
| 1.26      | 0.48       | 2.03       |   |       |       |       |       |       |       |
| GENE1061X | 15453_at   | 15453_at   | 1 | -0.12 | -0.88 | -1.04 | -0.45 | -0.19 | -1.13 |
| 0.36      | 0.64       | 1.21       |   |       |       |       |       |       |       |
| GENE2282X | 19457_at   | 19457_at   | 1 | 0.04  | -0.18 | -0.78 | -0.23 | -0.23 | -0.06 |
| 0.68      | 0.76       | 1.38       |   |       |       |       |       |       |       |
| GENE1751X | 17581_g_at | 17581_g_at | 1 | -0.4  | -0.73 | -0.86 | 0.11  | -0.72 | -1.01 |
| 3.34      | 2.57       | 2.15       |   |       |       |       |       |       |       |
| GENE690X  | 14298_g_at | 14298_g_at | 1 | -0.32 | -0.75 | -0.81 | 0.04  | -0.74 | -1.05 |
| 2.05      | 1.87       | 1.36       |   |       |       |       |       |       |       |
| GENE1750X | 17580_at   | 17580_at   | 1 | -0.06 | -0.32 | -0.47 | 0.15  | -0.47 | -0.67 |
| 1.15      | 0.93       | 0.71       |   |       |       |       |       |       |       |
| GENE185X  | 12536_s_at | 12536_s_at | 1 | 0.34  | -0.89 | -1.81 | 1.69  | 1     | -0.15 |
| 1.73      | 1.29       | 0.41       |   |       |       |       |       |       |       |
| GENE2460X | 20081_at   | 20081_at   | 1 | -0.45 | -0.81 | -1.04 | 0.64  | 1.13  | 0.21  |
| 1.03      | 0.47       | -0.06      |   |       |       |       |       |       |       |
| GENE921X  | 15053_at   | 15053_at   | 1 | -0.48 | -0.97 | -1.27 | 1     | 1.22  | 0.63  |
| 1.91      | 0.46       | -0.24      |   |       |       |       |       |       |       |
| GENE1960X | 18289_at   | 18289_at   | 1 | -0.22 | -0.48 | -2.07 | 1.29  | 0.15  | 0.63  |
| 1.26      | 0          | 0          |   |       |       |       |       |       |       |
| GENE1940X | 18259_s_at | 18259_s_at | 1 | -0.14 | -0.44 | -0.73 | 1.16  | 0.35  | 0.48  |
| 1.23      | 0.01       | -0.2       |   |       |       |       |       |       |       |
| GENE1655X | 17322_at   | 17322_at   | 1 | -0.45 | -0.36 | -0.71 | 1.05  | 0.35  | -0.13 |
| 1.02      | 0.26       | -0.13      |   |       |       |       |       |       |       |
| GENE2003X | 18484_at   | 18484_at   | 1 | -0.27 | -0.7  | -1.04 | 1.04  | 0.46  | 0.05  |
| 1.45      | 0.66       | -0.26      |   |       |       |       |       |       |       |
| GENE1290X | 16073_f_at | 16073_f_at | 1 | -0.84 | -2.84 | -2.84 | 2.7   | -0.15 | 1     |
| 3.32      | 0          | 0.84       |   |       |       |       |       |       |       |
| GENE163X  | 12457_at   | 12457_at   | 1 | -0.9  | -2.08 | -2.46 | 1.63  | -0.9  | -0.2  |
| 2.23      | -0.87      | -0.13      |   |       |       |       |       |       |       |
| GENE1548X | 16911_at   | 16911_at   | 1 | -0.37 | -2.23 | -1.93 | 2.07  | 0     | 0     |
| 1.71      | -0.48      | -0.48      |   |       |       |       |       |       |       |
| GENE2614X | 20525_at   | 20525_at   | 1 | -0.31 | -0.89 | -1.5  | 0.77  | -0.34 | -0.41 |
| 1.48      | 0.37       | 0.76       |   |       |       |       |       |       |       |
| GENE2328X | 19656_s_at | 19656_s_at | 1 | -0.16 | -1.2  | -1.29 | 0.64  | -0.61 | 0.04  |
| 1.16      | 0.36       | 0.57       |   |       |       |       |       |       |       |
| GENE1465X | 16555_at   | 16555_at   | 1 | -0.38 | -0.83 | -1.5  | 0.65  | 0     | -0.14 |
| 1.37      | 0          | 0.26       |   |       |       |       |       |       |       |
| GENE1587X | 17024_s_at | 17024_s_at | 1 | -0.41 | -1.49 | -2.09 | 0.71  | -1    | -0.68 |
| 2.6       | 0.03       | 0.09       |   |       |       |       |       |       |       |
| GENE2610X | 20518_at   | 20518_at   | 1 | -0.13 | -0.18 | -1.13 | -0.21 | 0.28  | 0.71  |
| 0.58      | 0.64       | 0.39       |   |       |       |       |       |       |       |
| GENE1111X | 15571_s_at | 15571_s_at | 1 | -0.06 | -0.15 | -1.38 | 0.22  | 0.5   | 0.22  |
| 0.18      | 0.23       | 0.31       |   |       |       |       |       |       |       |
| GENE2443X | 20027_at   | 20027_at   | 1 | -0.27 | -1.64 | -2.42 | 0.67  | 1.41  | 0.41  |
| 0.29      | 0.75       | -0.06      |   |       |       |       |       |       |       |
| GENE2101X | 18750_f_at | 18750_f_at | 1 | 1.22  | -0.11 | -1.94 | 0.32  | 0.03  | 0.03  |
| 0.74      | 0.77       | -0.78      |   |       |       |       |       |       |       |



|           |            |            |       |       |         |       |       |       |          |   |
|-----------|------------|------------|-------|-------|---------|-------|-------|-------|----------|---|
| GENE833X  | 14723_f_at | 14723_f_at | 1     | -0.02 | -0.35   | -0.59 | 1.22  | -0.54 | -0.4     |   |
|           | 1.05       | -0.00822   | 0.2   |       |         |       |       |       |          |   |
| GENE234X  | 12744_at   | 12744_at   | 1     | -0.41 | -0.6    | 0.08  | 0.8   | -1.39 | -0.5     |   |
|           | 1.93       | 0.39       | -0.04 |       |         |       |       |       |          |   |
| GENE1532X | 16820_at   | 16820_at   | 1     | 0.65  | 0.19    | -0.22 | 1.13  | -1    | 0.26     |   |
|           | 1.76       | 0.06       | -0.55 |       |         |       |       |       |          |   |
| GENE779X  | 14573_at   | 14573_at   | 1     | -0.26 | -0.26   | -0.26 | 1.45  | -0.61 | -0.06    |   |
|           | 2.71       | 0.84       | -0.32 |       |         |       |       |       |          |   |
| GENE1239X | 15981_at   | 15981_at   | 1     | -0.52 | -0.78   | -0.8  | 2.31  | -0.71 | -0.55    |   |
|           | 3.03       | 0.2        | -1.98 |       |         |       |       |       |          |   |
| GENE293X  | 12916_at   | 12916_at   | 1     | -0.98 | -1.8    | -0.95 | 0.53  | -1.18 | -1       |   |
|           | 1.63       | -0.08      | -0.73 |       |         |       |       |       |          |   |
| GENE2509X | 20227_s_at | 20227_s_at | 1     | -1.89 | -1.65   | -1.35 | 0.24  | -2.22 | -1.08    | 2 |
|           | -0.58      | -1.39      |       |       |         |       |       |       |          |   |
| GENE1509X | 16688_at   | 16688_at   | 1     | -0.51 | -0.53   | -0.63 | 0.47  | -1.17 | -0.26    |   |
|           | 0.6        | -0.18      | -0.26 |       |         |       |       |       |          |   |
| GENE2605X | 20495_s_at | 20495_s_at | 1     | -0.1  | -0.49   | -0.33 | 0.66  | -1.67 | -0.61    |   |
|           | 1.55       | -0.3       | -0.29 |       |         |       |       |       |          |   |
| GENE2276X | 19442_at   | 19442_at   | 1     | 0     | -0.84   | -0.84 | 0.82  | -1.32 | -0.44    |   |
|           | 1.34       | -0.22      | -0.73 |       |         |       |       |       |          |   |
| GENE199X  | 12587_at   | 12587_at   | 1     | -0.35 | -0.93   | -0.43 | 1.15  | -1.2  | -1.73    |   |
|           | 1.2        | -0.26      | -1    |       |         |       |       |       |          |   |
| GENE894X  | 14984_s_at | 14984_s_at | 1     | -0.05 | -0.3    | 0     | 0.48  | -1.12 | -0.75    |   |
|           | 0.83       | -0.24      | -0.82 |       |         |       |       |       |          |   |
| GENE2192X | 19135_at   | 19135_at   | 1     | -0.6  | -1.3    | -1    | 0.38  | -2.55 | -1.74    |   |
|           | 1.85       | -0.13      | -1.4  |       |         |       |       |       |          |   |
| GENE973X  | 15142_at   | 15142_at   | 1     | -0.18 | -0.2    | -0.43 | 0.08  | -1.34 | 0.27     | - |
|           | 0.65       | -0.19      | 0.62  |       |         |       |       |       |          |   |
| GENE501X  | 13558_s_at | 13558_s_at | 1     | -0.02 | 0.00608 |       | -0.42 | -0.08 | -1.14    | - |
|           | 0.33       | -0.42      | 0.54  |       |         |       |       |       |          |   |
| GENE1211X | 15886_at   | 15886_at   | 1     | -0.49 | -1.3    | -1    | 0.14  | -2.52 | 0.14     |   |
|           | 0.12       | -0.29      | 0.54  |       |         |       |       |       |          |   |
| GENE1093X | 15522_i_at | 15522_i_at | 1     | -0.37 | -1.15   | -0.82 | 0.18  | -2.43 | -0.00446 |   |
|           | 0.27       | -0.29      | 0.39  |       |         |       |       |       |          |   |
| GENE1653X | 17319_at   | 17319_at   | 1     | -0.08 | -0.5    | -0.62 | -0.11 | -1.21 | -0.08    | - |
|           | 0.19       | -0.38      | 0.28  |       |         |       |       |       |          |   |
| GENE1229X | 15933_at   | 15933_at   | 1     | -0.34 | -0.34   | -0.34 | -0.42 | -1.13 | 0.17     | - |
|           | 0.22       | 0.11       | 0.14  |       |         |       |       |       |          |   |
| GENE766X  | 14539_s_at | 14539_s_at | 1     | -0.76 | -0.65   | -0.54 | -0.22 | -1.16 | 0        | - |
|           | 0.58       | -0.58      | 0.32  |       |         |       |       |       |          |   |
| GENE2476X | 20149_at   | 20149_at   | 1     | -0.57 | -0.33   | -0.51 | -0.53 | -1.18 | -0.21    | - |
|           | 0.6        | -0.72      | 0.13  |       |         |       |       |       |          |   |
| GENE659X  | 14069_at   | 14069_at   | 1     | -0.84 | -1      | -0.9  | -0.2  | -1.62 | -0.07    | - |
|           | 0.13       | -0.48      | 0.22  |       |         |       |       |       |          |   |
| GENE830X  | 14717_s_at | 14717_s_at | 1     | -0.71 | -0.99   | -0.92 | -0.25 | -1.57 | -0.43    | - |
|           | 0.53       | -0.73      | -0.12 |       |         |       |       |       |          |   |
| GENE511X  | 13569_at   | 13569_at   | 1     | -1.07 | -0.74   | -0.3  | -1.08 | -1.35 | -0.54    | - |
|           | 1.41       | -0.09      | 0.12  |       |         |       |       |       |          |   |
| GENE950X  | 15105_s_at | 15105_s_at | 1     | -0.76 | -1.07   | -0.95 | -0.15 | -1.25 | -1.5     |   |
|           | 0.56       | -0.76      | -1.12 |       |         |       |       |       |          |   |
| GENE577X  | 13785_at   | 13785_at   | 1     | -1.72 | -1.72   | -1.71 | -0.39 | -1.96 | -1.82    |   |
|           | 1.22       | -1.76      | -1.36 |       |         |       |       |       |          |   |
| GENE1112X | 15574_s_at | 15574_s_at | 1     | -0.65 | -0.41   | -0.5  | -0.16 | -1.23 | -1.43    |   |
|           | 0.95       | -0.43      | -0.49 |       |         |       |       |       |          |   |
| GENE2534X | 20290_s_at | 20290_s_at | 1     | -0.23 | -0.88   | -1.1  | -0.69 | -1.56 | -0.82    |   |
|           | 0.52       | -0.66      | -0.17 |       |         |       |       |       |          |   |

|           |            |            |   |       |       |       |       |       |       |
|-----------|------------|------------|---|-------|-------|-------|-------|-------|-------|
| GENE960X  | 15125_f_at | 15125_f_at | 1 | -1.25 | -1.42 | -0.45 | -0.95 | -2.91 | -2.02 |
| 0.67      | -1.21      | -0.54      |   |       |       |       |       |       |       |
| GENE2265X | 19406_at   | 19406_at   | 1 | -0.37 | -0.56 | -0.66 | -0.44 | -1.82 | -1.31 |
| 0.48      | -0.1       | -0.28      |   |       |       |       |       |       |       |
| GENE972X  | 15141_s_at | 15141_s_at | 1 | -0.72 | -1.65 | -1.18 | -0.58 | -3.26 | -2.24 |
| 0.49      | -0.77      | -1.29      |   |       |       |       |       |       |       |
| GENE1463X | 16553_f_at | 16553_f_at | 1 | -1.44 | -0.94 | -0.8  | -0.75 | -1.35 | -1.47 |
| 0.68      | 0.34       | 0.18       |   |       |       |       |       |       |       |
| GENE51X   | 12125_at   | 12125_at   | 1 | -0.3  | -0.42 | -0.55 | -0.38 | -0.87 | -1.06 |
| 0.3       | 0.06       | 0.07       |   |       |       |       |       |       |       |
| GENE608X  | 13927_at   | 13927_at   | 1 | -0.35 | -0.79 | -0.88 | -0.52 | -1.34 | -1.44 |
| 0.32      | -0.06      | 0          |   |       |       |       |       |       |       |
| GENE879X  | 14926_g_at | 14926_g_at | 1 | -0.37 | -0.4  | -0.58 | -0.28 | -0.68 | -1.13 |
| 0.61      | -0.14      | 0.19       |   |       |       |       |       |       |       |
| GENE1266X | 16039_s_at | 16039_s_at | 1 | -0.41 | -0.52 | -0.21 | -0.08 | -1.63 | -1.04 |
| 0.52      | -0.06      | 0.25       |   |       |       |       |       |       |       |
| GENE1248X | 16001_at   | 16001_at   | 1 | -0.72 | -0.39 | -0.09 | -1.37 | -2.21 | -1.22 |
| 0.21      | 0.03       | 0.41       |   |       |       |       |       |       | -     |
| GENE2488X | 20178_at   | 20178_at   | 1 | 0.01  | -0.16 | -0.61 | -1.28 | -1.29 | -1.29 |
| 0.18      | 0.13       | 0.1        |   |       |       |       |       |       | -     |
| GENE1218X | 15909_at   | 15909_at   | 1 | 0.02  | -0.45 | -0.61 | -0.55 | -1.35 | -1.29 |
| 0.11      | -0.73      | -0.26      |   |       |       |       |       |       |       |
| GENE446X  | 13314_at   | 13314_at   | 1 | 0.07  | 0.03  | -0.7  | -1.19 | -2.19 | -2.38 |
| 0.13      | -0.52      | -0.66      |   |       |       |       |       |       | -     |
| GENE1272X | 16047_at   | 16047_at   | 1 | 0.31  | -0.09 | -0.07 | -0.5  | -0.75 | -1    |
| 0.21      | -0.1       | 0.00876    |   |       |       |       |       |       |       |
| GENE2068X | 18669_at   | 18669_at   | 1 | -0.08 | -0.19 | -0.28 | -0.28 | -1.24 | -0.4  |
| 0.14      | -0.13      | -0.42      |   |       |       |       |       |       | -     |
| GENE76X   | 12191_at   | 12191_at   | 1 | -0.34 | -0.52 | -0.58 | -1.08 | -2.5  | -1.04 |
| 0.19      | -0.16      | -0.48      |   |       |       |       |       |       |       |
| GENE1913X | 18176_at   | 18176_at   | 1 | 0     | -0.15 | 0.27  | -0.36 | -1.43 | -0.62 |
| 0.12      | -0.15      | -0.29      |   |       |       |       |       |       | -     |
| GENE1735X | 17552_s_at | 17552_s_at | 1 | -1.02 | -1.01 | -0.83 | -1.54 | -1.44 | -0.69 |
| 0.32      | 0.78       | 0.78       |   |       |       |       |       |       |       |
| GENE1002X | 15196_s_at | 15196_s_at | 1 | -1.36 | -1.72 | -1.55 | -1.22 | -0.75 | -0.98 |
| 0.04      | 0.82       | 0.66       |   |       |       |       |       |       | -     |
| GENE1583X | 17010_s_at | 17010_s_at | 1 | -2.81 | -2.81 | -2.12 | -2.14 | -1.64 | -1.98 |
| 0.22      | 0.39       | 0.02       |   |       |       |       |       |       |       |
| GENE2258X | 19391_at   | 19391_at   | 1 | -0.44 | -0.68 | -0.4  | -1.39 | -0.85 | -0.85 |
| 0.2       | 0.09       | 0.18       |   |       |       |       |       |       | -     |
| GENE58X   | 12145_at   | 12145_at   | 1 | -0.06 | -0.45 | -0.13 | -1.34 | -0.68 | -0.95 |
| 0.28      | 0.11       | 0.17       |   |       |       |       |       |       | -     |
| GENE2116X | 18833_at   | 18833_at   | 1 | -0.47 | -0.58 | -0.76 | -3.34 | -1.12 | -1.68 |
| 0.31      | 0.36       | -0.25      |   |       |       |       |       |       | -     |
| GENE105X  | 12268_at   | 12268_at   | 1 | -0.04 | -0.12 | -0.19 | -1.94 | -1    | -1.75 |
| 0.64      | -0.6       | -0.42      |   |       |       |       |       |       | -     |
| GENE2420X | 19977_at   | 19977_at   | 1 | -0.74 | -0.2  | 0.25  | -1.9  | -1.62 | -1.3  |
| 0.1       | -0.53      | -0.62      |   |       |       |       |       |       | -     |
| GENE1732X | 17538_at   | 17538_at   | 1 | -0.15 | 0     | -0.28 | -1.02 | -0.1  | -1.25 |
| 0.11      | 0.15       | 0.04       |   |       |       |       |       |       |       |
| GENE582X  | 13807_at   | 13807_at   | 1 | -0.5  | -0.27 | -0.18 | -0.97 | -0.65 | -1.44 |
| 0.25      | 0.63       | -0.28      |   |       |       |       |       |       | -     |
| GENE706X  | 14401_at   | 14401_at   | 1 | -0.15 | -0.5  | -0.67 | 0.08  | -0.89 | 1.12  |
| 1.3       | -1.1       | 0.24       |   |       |       |       |       |       | -     |
| GENE1936X | 18250_at   | 18250_at   | 1 | -0.28 | -0.31 | -0.33 | 0.2   | -0.63 | 0.25  |
| 0.54      | -1.23      | -0.37      |   |       |       |       |       |       | -     |

|           |            |            |       |       |       |          |       |       |       |   |
|-----------|------------|------------|-------|-------|-------|----------|-------|-------|-------|---|
| GENE338X  | 13081_s_at | 13081_s_at | 1     | -0.28 | -0.39 | -0.35    | -0.07 | -0.34 | 0.31  | - |
|           | 0.91       | -1.04      | -0.65 |       |       |          |       |       |       |   |
| GENE2387X | 19897_s_at | 19897_s_at | 1     | 0.13  | -0.39 | -0.25    | 0.46  | -0.22 | 0.17  | - |
|           | 0.65       | -1.22      | -0.3  |       |       |          |       |       |       |   |
| GENE1930X | 18235_at   | 18235_at   | 1     | -0.02 | -0.15 | -0.00673 |       | 1.12  | 0.54  |   |
|           | 1.1        | -2.46      | -4.05 | -0.94 |       |          |       |       |       |   |
| GENE990X  | 15175_s_at | 15175_s_at | 1     | -0.42 | -0.87 | -1.04    | 0.32  | -0.16 | 0.05  | - |
|           | 0.58       | -0.58      | 0.09  |       |       |          |       |       |       |   |
| GENE484X  | 13533_at   | 13533_at   | 1     | -0.64 | -1.24 | -0.89    | 0.45  | 0.15  | 0.38  | - |
|           | 0.65       | -0.65      | 0     |       |       |          |       |       |       |   |
| GENE1858X | 18013_r_at | 18013_r_at | 1     | -0.32 | -0.81 | -1.08    | 0.07  | 0.3   | -0.14 | - |
|           | 0.52       | -0.55      | -0.3  |       |       |          |       |       |       |   |
| GENE1915X | 18192_s_at | 18192_s_at | 1     | -0.81 | -1.65 | -1       | 0.07  | 0.65  | 0.33  | - |
|           | 0.67       | -0.97      | -0.6  |       |       |          |       |       |       |   |
| GENE1703X | 17461_at   | 17461_at   | 1     | -1.05 | -1.09 | -1.09    | 0.15  | 0.26  | -0.09 | - |
|           | 0.87       | -0.4       | -0.31 |       |       |          |       |       |       |   |
| GENE488X  | 13541_at   | 13541_at   | 1     | -1.2  | -0.98 | -1.34    | -0.02 | -0.15 | -0.42 | - |
|           | 0.96       | -0.64      | -0.64 |       |       |          |       |       |       |   |
| GENE2155X | 18958_s_at | 18958_s_at | 1     | -0.57 | -0.6  | -0.52    | 0.14  | 0     | -0.02 | - |
|           | 1.12       | -0.62      | -0.56 |       |       |          |       |       |       |   |
| GENE925X  | 15059_at   | 15059_at   | 1     | -0.83 | -0.57 | -0.66    | 0.63  | 0.09  | -0.26 | - |
|           | 0.29       | -0.9       | -1.02 |       |       |          |       |       |       |   |
| GENE1994X | 18436_at   | 18436_at   | 1     | -0.86 | -0.79 | -1.1     | 0.72  | -0.07 | -0.03 | - |
|           | 0.55       | -1.17      | -1.25 |       |       |          |       |       |       |   |
| GENE1854X | 18008_r_at | 18008_r_at | 1     | -0.93 | -1.27 | -0.64    | 1.22  | 0.2   | 0.69  | - |
|           | 1.25       | -1.75      | -1.33 |       |       |          |       |       |       |   |
| GENE1017X | 15237_at   | 15237_at   | 1     | -0.12 | -0.49 | -1.06    | 0.72  | -0.71 | -0.18 | - |
|           | 0.09       | -0.86      | -0.95 |       |       |          |       |       |       |   |
| GENE545X  | 13640_at   | 13640_at   | 1     | -0.44 | -1.83 | -1.68    | 1.23  | -0.72 | 0.29  |   |
|           | 0.37       | -1.29      | -1.58 |       |       |          |       |       |       |   |
| GENE480X  | 13513_at   | 13513_at   | 1     | -0.7  | -0.87 | -0.91    | 0.29  | -0.25 | -0.5  | - |
|           | 0.69       | -1.38      | -0.82 |       |       |          |       |       |       |   |
| GENE1365X | 16316_at   | 16316_at   | 1     | -0.6  | -1.01 | -0.68    | 0.42  | -0.37 | -0.9  | - |
|           | 0.64       | -1.32      | -1.1  |       |       |          |       |       |       |   |
| GENE418X  | 13250_s_at | 13250_s_at | 1     | -0.41 | -1.41 | -0.83    | -0.04 | -0.54 | -0.54 | - |
|           | 0.76       | -1.42      | -1.35 |       |       |          |       |       |       |   |
| GENE94X   | 12235_at   | 12235_at   | 1     | -1.08 | -2.28 | -1.76    | 0.07  | -1.2  | -1.3  | - |
|           | 0.97       | -2.55      | -2.4  |       |       |          |       |       |       |   |
| GENE845X  | 14746_at   | 14746_at   | 1     | -0.15 | -0.86 | -0.86    | 0.35  | -0.07 | -0.36 | - |
|           | 0.63       | -0.89      | -1.11 |       |       |          |       |       |       |   |
| GENE2676X | 20710_at   | 20710_at   | 1     | -0.26 | -0.74 | -0.8     | -0.04 | 0     | -0.52 | - |
|           | 0.54       | -1.05      | -1.17 |       |       |          |       |       |       |   |
| GENE887X  | 14956_at   | 14956_at   | 1     | -0.4  | -0.98 | -1.02    | 0.23  | -0.04 | -0.64 | - |
|           | 0.5        | -1.34      | -1.81 |       |       |          |       |       |       |   |
| GENE2592X | 20457_at   | 20457_at   | 1     | -0.81 | -1.24 | -0.97    | -0.17 | -0.31 | -0.45 | - |
|           | 0.33       | -1.03      | -0.58 |       |       |          |       |       |       |   |
| GENE2429X | 19995_at   | 19995_at   | 1     | -0.75 | -0.96 | -1.03    | 0     | -0.36 | -0.49 | - |
|           | 0.51       | -0.78      | -0.72 |       |       |          |       |       |       |   |
| GENE1767X | 17643_at   | 17643_at   | 1     | -1.38 | -1.69 | -1.69    | 0.11  | -0.83 | -0.63 | - |
|           | 0.74       | -1.31      | -1.25 |       |       |          |       |       |       |   |
| GENE2260X | 19396_at   | 19396_at   | 1     | -1.45 | -1.89 | -1.72    | 0.49  | -0.5  | -0.75 | - |
|           | 0.58       | -1.46      | -1.36 |       |       |          |       |       |       |   |
| GENE1662X | 17361_s_at | 17361_s_at | 1     | -0.84 | -2.53 | -2.63    | 0.12  | -0.45 | -0.37 | - |
|           | 1.8        | -2.07      | -1.22 |       |       |          |       |       |       |   |
| GENE1681X | 17408_at   | 17408_at   | 1     | -1.22 | -2.66 | -3.01    | 0.21  | -1.07 | -0.78 | - |
|           | 2.49       | -2.78      | -1.43 |       |       |          |       |       |       |   |

|           |            |            |       |       |       |       |       |       |       |   |
|-----------|------------|------------|-------|-------|-------|-------|-------|-------|-------|---|
| GENE699X  | 14384_at   | 14384_at   | 1     | -0.87 | -1    | -1.35 | 0.4   | -0.85 | -0.39 | - |
|           | 0.75       | -2.44      | -0.72 |       |       |       |       |       |       |   |
| GENE1614X | 17103_s_at | 17103_s_at | 1     | -0.59 | -1.03 | -1    | -1.07 | -0.36 | 0.21  | - |
|           | 0.98       | -0.31      | -0.38 |       |       |       |       |       |       |   |
| GENE645X  | 14037_at   | 14037_at   | 1     | -1.19 | -1.39 | -1.32 | -0.74 | -0.85 | 0.12  | - |
|           | 1.29       | -1.46      | -0.52 |       |       |       |       |       |       |   |
| GENE2195X | 19147_at   | 19147_at   | 1     | -0.66 | -0.77 | -1.07 | -0.64 | 0.09  | 0.13  | - |
|           | 1.38       | -0.84      | -0.8  |       |       |       |       |       |       |   |
| GENE470X  | 13447_at   | 13447_at   | 1     | -0.97 | -1.64 | -2.72 | -1.4  | -0.4  | -0.84 | - |
|           | 2.45       | -0.69      | -1.19 |       |       |       |       |       |       |   |
| GENE744X  | 14492_s_at | 14492_s_at | 1     | -0.33 | -0.36 | -0.82 | -0.57 | -0.49 | -0.44 | - |
|           | 1.25       | -0.78      | -0.46 |       |       |       |       |       |       |   |
| GENE499X  | 13554_at   | 13554_at   | 1     | -0.63 | -0.75 | -0.78 | -0.87 | -0.73 | -0.44 | - |
|           | 1.81       | -1.23      | -1.04 |       |       |       |       |       |       |   |
| GENE893X  | 14982_at   | 14982_at   | 1     | -0.95 | -1.3  | -1.19 | -0.56 | 0.35  | 0.33  | - |
|           | 0.28       | -0.42      | 0.32  |       |       |       |       |       |       |   |
| GENE42X   | 12103_at   | 12103_at   | 1     | -0.46 | -1.58 | -0.62 | 0.35  | 0.35  | 0.14  |   |
|           | 0.08       | -0.06      | -0.03 |       |       |       |       |       |       |   |
| GENE787X  | 14595_at   | 14595_at   | 1     | -0.71 | -1.11 | -0.5  | 0.32  | -0.08 | 0.24  |   |
|           | 0.26       | -0.28      | -0.18 |       |       |       |       |       |       |   |
| GENE1089X | 15516_s_at | 15516_s_at | 1     | -0.82 | -1.2  | -0.88 | -0.04 | 0.35  | -0.04 |   |
|           | 0.16       | -0.33      | -0.22 |       |       |       |       |       |       |   |
| GENE1689X | 17423_s_at | 17423_s_at | 1     | -1.25 | -2.21 | -2.01 | 0.3   | -0.8  | 0.09  | - |
|           | 0.03       | -0.88      | 0.25  |       |       |       |       |       |       |   |
| GENE1346X | 16239_at   | 16239_at   | 1     | -0.51 | -1.01 | -0.65 | 0.13  | -0.1  | -0.18 | - |
|           | 0.12       | -0.24      | 0.17  |       |       |       |       |       |       |   |
| GENE240X  | 12757_at   | 12757_at   | 1     | -0.95 | -1.76 | -1.8  | 0.72  | -0.55 | -0.89 | - |
|           | 0.05       | -0.61      | 0.1   |       |       |       |       |       |       |   |
| GENE2235X | 19258_at   | 19258_at   | 1     | -0.58 | -1.28 | -1.24 | 0.53  | -0.5  | -0.5  | - |
|           | 0.02       | -0.47      | -0.02 |       |       |       |       |       |       |   |
| GENE2351X | 19755_at   | 19755_at   | 1     | -0.54 | -1.04 | -0.44 | 0.1   | -0.05 | -0.34 |   |
|           | 0.08       | -0.41      | 0     |       |       |       |       |       |       |   |
| GENE1078X | 15483_s_at | 15483_s_at | 1     | -1.44 | -2.72 | -1.39 | 0.12  | -0.56 | -0.63 |   |
|           | 0.11       | 0.1        | -0.25 |       |       |       |       |       |       |   |
| GENE2177X | 19049_at   | 19049_at   | 1     | -0.68 | -1.3  | -1.4  | -0.32 | -0.82 | -0.55 |   |
|           | 0.28       | -0.02      | 0.02  |       |       |       |       |       |       |   |
| GENE828X  | 14712_s_at | 14712_s_at | 1     | -1.13 | -2.17 | -2.32 | -0.22 | -1    | -0.83 |   |
|           | 0.22       | 0.03       | -0.55 |       |       |       |       |       |       |   |
| GENE615X  | 13950_at   | 13950_at   | 1     | -0.94 | -1.35 | -1.39 | -0.03 | -0.58 | 0.04  |   |
|           | 0.43       | -0.06      | 0.04  |       |       |       |       |       |       |   |
| GENE931X  | 15077_at   | 15077_at   | 1     | -0.9  | -1.17 | -1.13 | 0.01  | -0.3  | -0.15 | - |
|           | 0.26       | -0.36      | -0.15 |       |       |       |       |       |       |   |
| GENE1428X | 16486_at   | 16486_at   | 1     | -0.89 | -1.54 | -1.45 | 0.27  | -0.2  | -0.61 | - |
|           | 0.05       | -0.39      | -0.38 |       |       |       |       |       |       |   |
| GENE1217X | 15907_at   | 15907_at   | 1     | -0.46 | -1.08 | -1.02 | -0.28 | -0.28 | -0.37 | - |
|           | 0.08       | -0.22      | -0.17 |       |       |       |       |       |       |   |
| GENE1744X | 17572_s_at | 17572_s_at | 1     | -1.15 | -2.37 | -2.82 | -0.48 | -0.48 | -0.48 | - |
|           | 0.67       | -0.67      | -0.67 |       |       |       |       |       |       |   |
| GENE1986X | 18356_at   | 18356_at   | 1     | -0.53 | -1.11 | -1.17 | -0.25 | -0.43 | 0.09  |   |
|           | 0.19       | -0.71      | -0.45 |       |       |       |       |       |       |   |
| GENE1586X | 17019_s_at | 17019_s_at | 1     | -0.64 | -1.23 | -1.6  | -0.28 | -0.45 | -0.13 |   |
|           | 0.16       | -0.41      | -0.67 |       |       |       |       |       |       |   |
| GENE1654X | 17320_g_at | 17320_g_at | 1     | -0.63 | -1.16 | -1.56 | 0.35  | -0.47 | 0.14  | - |
|           | 0.34       | -0.15      | -0.12 |       |       |       |       |       |       |   |
| GENE182X  | 12531_at   | 12531_at   | 1     | -0.62 | -1.22 | -1.3  | 0.23  | 0.08  | 0.02  | - |
|           | 0.28       | -0.22      | -0.07 |       |       |       |       |       |       |   |



|           |            |            |       |       |       |       |       |       |       |
|-----------|------------|------------|-------|-------|-------|-------|-------|-------|-------|
| GENE1862X | 18017_f_at | 18017_f_at | 1     | -1.08 | -1.11 | -0.7  | -0.41 | 0.6   | -0.67 |
|           | 0.07       | 0.53       | -1.41 |       |       |       |       |       |       |
| GENE1861X | 18016_r_at | 18016_r_at | 1     | -1.76 | -1.84 | -1.84 | -0.76 | 0.08  | -1.76 |
|           | 0.11       | 0.35       | -2.64 |       |       |       |       |       |       |
| GENE1860X | 18015_i_at | 18015_i_at | 1     | -1.17 | -1.95 | -1.55 | 0.1   | 1.62  | -0.76 |
|           | 0.03       | 0.35       | -3.2  |       |       |       |       |       |       |
| GENE1199X | 15846_at   | 15846_at   | 1     | 0.28  | -1.04 | -0.9  | -0.49 | -0.38 | -1.02 |
|           | 0.13       | -0.33      | -0.5  |       |       |       |       |       |       |
| GENE826X  | 14704_s_at | 14704_s_at | 1     | 0.2   | -1.31 | -0.7  | -0.35 | -0.19 | -0.97 |
|           | 0.14       | -0.29      | -0.74 |       |       |       |       |       |       |
| GENE2104X | 18754_at   | 18754_at   | 1     | -0.36 | -0.72 | -1.1  | -0.5  | -0.11 | -0.91 |
|           | 0.62       | -0.81      | -0.62 |       |       |       |       |       |       |
| GENE674X  | 14111_s_at | 14111_s_at | 1     | -0.36 | -1.05 | -0.89 | -0.68 | -0.35 | -1.48 |
|           | 0.52       | -0.45      | -0.75 |       |       |       |       |       |       |
| GENE274X  | 12819_at   | 12819_at   | 1     | -0.56 | -0.79 | -0.87 | -0.16 | -0.48 | -1.02 |
|           | 0.24       | -0.71      | -1.04 |       |       |       |       |       |       |
| GENE1626X | 17169_at   | 17169_at   | 1     | -0.63 | -0.73 | -1.06 | -0.12 | -0.47 | -1.02 |
|           | 0.04       | -0.63      | -1.04 |       |       |       |       |       |       |
| GENE1192X | 15829_at   | 15829_at   | 1     | -0.37 | -0.72 | -0.87 | -0.27 | -0.41 | -1.04 |
|           | 0.36       | -1.04      | -0.93 |       |       |       |       |       |       |
| GENE2393X | 19907_at   | 19907_at   | 1     | -0.59 | -1.33 | -1.08 | -0.12 | -0.66 | -1.52 |
|           | 0.14       | -1.33      | -1.4  |       |       |       |       |       |       |
| GENE308X  | 12968_at   | 12968_at   | 1     | -0.48 | -0.77 | -1.2  | -0.59 | -0.35 | -1.88 |
|           | 0.11       | -0.96      | -1.52 |       |       |       |       |       |       |
| GENE1591X | 17040_s_at | 17040_s_at | 1     | 0.53  | -0.18 | -0.5  | -0.43 | -0.45 | -1.01 |
|           | 0.01       | -0.78      | -0.66 |       |       |       |       |       |       |
| GENE2135X | 18913_s_at | 18913_s_at | 1     | 0.58  | -0.2  | -0.87 | 0     | -0.05 | -1.16 |
|           | 0.09       | -0.88      | -0.92 |       |       |       |       |       |       |
| GENE1332X | 16184_at   | 16184_at   | 1     | -0.45 | -0.6  | -1.07 | -1.46 | -0.63 | -1.89 |
|           | 0.36       | -0.3       | -1.53 |       |       |       |       |       |       |
| GENE1775X | 17726_at   | 17726_at   | 1     | 0.21  | -0.18 | -0.75 | -0.98 | -0.45 | -1.17 |
|           | 0.39       | -0.76      | -1.86 |       |       |       |       |       |       |
| GENE1459X | 16543_s_at | 16543_s_at | 1     | -0.39 | -0.6  | -1.25 | -0.13 | -0.47 | -0.83 |
|           | 0.16       | -0.41      | 0.36  |       |       |       |       |       |       |
| GENE298X  | 12945_at   | 12945_at   | 1     | -0.62 | -1.33 | -2.5  | -0.8  | -0.8  | -1.48 |
|           | 0          | 0          |       |       |       |       |       |       |       |
| GENE260X  | 12795_at   | 12795_at   | 1     | -0.88 | -1.65 | -1.71 | -0.26 | -0.65 | -1.23 |
|           | 0.1        | 0          | -0.04 |       |       |       |       |       |       |
| GENE245X  | 12765_at   | 12765_at   | 1     | -0.52 | -1.1  | -1.47 | -0.05 | -0.48 | -0.89 |
|           | 0.12       | 0          | -0.38 |       |       |       |       |       |       |
| GENE2572X | 20401_at   | 20401_at   | 1     | -0.2  | -0.8  | -1.31 | -0.28 | -0.72 | -1.06 |
|           | 0.21       | -0.43      | -0.08 |       |       |       |       |       |       |
| GENE2181X | 19091_at   | 19091_at   | 1     | -0.55 | -1.06 | -1.3  | -0.32 | -0.71 | -0.79 |
|           | 0.06       | -0.38      | 0.02  |       |       |       |       |       |       |
| GENE1934X | 18245_s_at | 18245_s_at | 1     | -0.57 | -1.04 | -1.04 | -0.35 | -0.91 | -0.97 |
|           | 0.21       | -0.25      | -0.21 |       |       |       |       |       |       |
| GENE1236X | 15972_at   | 15972_at   | 1     | -0.61 | -1.25 | -1.2  | -0.28 | -1.05 | -0.78 |
|           | 0.14       | -0.47      | -0.25 |       |       |       |       |       |       |
| GENE1518X | 16742_at   | 16742_at   | 1     | -1.78 | -2.04 | -2.25 | -0.84 | -3.6  | -3.6  |
|           | 0.95       | 0.13       | -0.14 |       |       |       |       |       |       |
| GENE205X  | 12609_at   | 12609_at   | 1     | -1.32 | -4.73 | -4.73 | -0.76 | -4.42 | -4.42 |
|           | 0.26       | -0.26      | -0.26 |       |       |       |       |       |       |
| GENE406X  | 13218_s_at | 13218_s_at | 1     | -0.7  | -1.15 | -1.08 | -0.17 | -1.17 | -1.31 |
|           | 0.22       | -0.23      | -0.52 |       |       |       |       |       |       |
| GENE1175X | 15761_at   | 15761_at   | 1     | -1.08 | -2.36 | -3.48 | -0.62 | -3.5  | -3.92 |
|           | 0.32       | -0.58      | -1.58 |       |       |       |       |       |       |

|           |            |            |       |       |       |       |       |       |       |
|-----------|------------|------------|-------|-------|-------|-------|-------|-------|-------|
| GENE82X   | 12213_at   | 12213_at   | 1     | -0.11 | -0.52 | -0.53 | 0.18  | -1.29 | -0.41 |
|           | 0.05       | -0.65      | -0.23 |       |       |       |       |       |       |
| GENE810X  | 14654_s_at | 14654_s_at | 1     | -0.14 | -0.62 | -0.7  | -0.01 | -1.37 | -0.53 |
|           | 0.11       | -0.93      | -0.44 |       |       |       |       |       |       |
| GENE2373X | 19867_at   | 19867_at   | 1     | -0.15 | -0.73 | -0.9  | -0.01 | -1.85 | -0.96 |
|           | 0.11       | -1.35      | -0.73 |       |       |       |       |       |       |
| GENE677X  | 14121_at   | 14121_at   | 1     | -0.34 | -0.34 | -0.69 | 0.13  | -1.3  | -0.57 |
|           | 0.08       | -0.75      | -0.62 |       |       |       |       |       |       |
| GENE1425X | 16482_s_at | 16482_s_at | 1     | -0.21 | -0.64 | -0.89 | 0.03  | -1.3  | -0.8  |
|           | 0.23       | -0.51      | 0.03  |       |       |       |       |       |       |
| GENE271X  | 12815_at   | 12815_at   | 1     | -0.33 | -0.67 | -0.46 | -0.29 | -1.49 | -0.97 |
|           | 0.63       | -0.37      | -0.17 |       |       |       |       |       |       |
| GENE193X  | 12561_at   | 12561_at   | 1     | -0.35 | -0.9  | -1.1  | -0.99 | -2.72 | -1.44 |
|           | 0.79       | -1.23      | -0.34 |       |       |       |       |       |       |
| GENE1417X | 16459_s_at | 16459_s_at | 1     | -1.16 | -1.62 | -1.41 | 0.3   | -2.04 | -1.41 |
|           | 0.74       | -0.31      | -0.52 |       |       |       |       |       |       |
| GENE743X  | 14491_at   | 14491_at   | 1     | -0.86 | -1.47 | -1.11 | 0.36  | -2.19 | -0.73 |
|           | 0.82       | -0.54      | -0.83 |       |       |       |       |       |       |
| GENE2394X | 19910_at   | 19910_at   | 1     | -0.92 | -1.31 | -1.43 | -0.33 | -1.74 | -1.01 |
|           | 0.28       | -0.44      | -0.2  |       |       |       |       |       |       |
| GENE2545X | 20315_i_at | 20315_i_at | 1     | -1.27 | -2.04 | -2.67 | 0     | -2.67 | -1.3  |
|           | 0.5        | -1.25      | -0.78 |       |       |       |       |       |       |
| GENE2125X | 18886_at   | 18886_at   | 1     | -0.52 | -1.85 | -1.1  | 0.17  | -1.81 | -1.34 |
|           | 0.14       | -1.04      | -0.67 |       |       |       |       |       |       |
| GENE1312X | 16126_s_at | 16126_s_at | 1     | -1.17 | -2.01 | -1.82 | 0.53  | -2.56 | -1.45 |
|           | 0.49       | -1.68      | -1    |       |       |       |       |       |       |
| GENE1237X | 15975_s_at | 15975_s_at | 1     | -1.3  | -1.5  | -1.3  | 0.07  | -1.5  | 0.01  |
|           | 0.41       | -0.9       | -0.98 |       |       |       |       |       |       |
| GENE2086X | 18706_s_at | 18706_s_at | 1     | -0.75 | -1.16 | -0.7  | 0.26  | -0.84 | -0.63 |
|           | 0.02       | -0.58      | -0.69 |       |       |       |       |       |       |
| GENE2357X | 19809_at   | 19809_at   | 1     | -1.06 | -1.24 | -1.39 | -0.06 | -1.16 | -0.66 |
|           | 0.1        | -0.72      | -0.51 |       |       |       |       |       |       |
| GENE409X  | 13230_at   | 13230_at   | 1     | -0.81 | -1.34 | -1.36 | -0.08 | -0.96 | -0.87 |
|           | 0.21       | -0.59      | -0.74 |       |       |       |       |       |       |
| GENE243X  | 12761_s_at | 12761_s_at | 1     | -3.74 | -4.26 | -3.99 | -0.23 | -2.34 | -2.21 |
|           | 0.13       | -2.34      | -2.5  |       |       |       |       |       |       |
| GENE2221X | 19209_s_at | 19209_s_at | 1     | -0.55 | -1.03 | -1.3  | 0.31  | -0.82 | -1.07 |
|           | 0.12       | -1         | -0.7  |       |       |       |       |       |       |
| GENE2136X | 18917_i_at | 18917_i_at | 1     | -0.56 | -1.59 | -1.77 | 0.23  | -1.01 | -1.09 |
|           | 0.05       | -1.36      | -0.89 |       |       |       |       |       |       |
| GENE673X  | 14105_at   | 14105_at   | 1     | -0.79 | -1.49 | -1.29 | -0.1  | -1    | -1.34 |
|           | 0.22       | -1.84      | -1    |       |       |       |       |       |       |
| GENE2304X | 19569_at   | 19569_at   | 1     | -0.53 | -1.08 | -1.02 | 0.25  | -0.58 | -0.5  |
|           | 0.22       | -0.93      | -0.93 |       |       |       |       |       |       |
| GENE2642X | 20615_at   | 20615_at   | 1     | -0.48 | -1.27 | -1.37 | 0.12  | -1.1  | -0.28 |
|           | 0.15       | -1         | -1    |       |       |       |       |       |       |
| GENE1041X | 15383_at   | 15383_at   | 1     | -0.4  | -0.73 | -1.22 | 0.26  | -0.89 | -0.32 |
|           | 0.19       | -0.63      | -0.52 |       |       |       |       |       |       |
| GENE1155X | 15664_at   | 15664_at   | 1     | -0.46 | -0.78 | -1.07 | 0.45  | -1.08 | -0.67 |
|           | 0.17       | -0.94      | -0.76 |       |       |       |       |       |       |
| GENE459X  | 13382_at   | 13382_at   | 1     | -0.2  | -0.64 | -0.98 | 0     | -1.24 | -0.54 |
|           | 0.33       | -0.67      | -0.64 |       |       |       |       |       |       |
| GENE1982X | 18344_at   | 18344_at   | 1     | -0.48 | -0.93 | -1.33 | 0.13  | -1.35 | -0.54 |
|           | 0.77       | -0.95      | -1.15 |       |       |       |       |       |       |
| GENE2041X | 18608_at   | 18608_at   | 1     | -0.61 | -0.8  | -1.22 | 0.06  | -0.96 | -0.96 |
|           | 0.03       | -0.73      | -0.9  |       |       |       |       |       |       |





|           |            |            |       |       |       |       |       |       |       |    |
|-----------|------------|------------|-------|-------|-------|-------|-------|-------|-------|----|
| GENE2194X | 19144_at   | 19144_at   | 1     | -0.61 | -0.81 | -0.87 | -0.28 | -0.97 | -1.25 | -  |
|           | 0.27       | -0.87      | -1.18 |       |       |       |       |       |       |    |
| GENE551X  | 13651_at   | 13651_at   | 1     | -1.51 | -2.19 | -2.19 | -0.93 | -2.88 | -3.32 | -  |
|           | 1.03       | -2.26      | -2.64 |       |       |       |       |       |       |    |
| GENE571X  | 13700_at   | 13700_at   | 1     | -1.58 | -2.39 | -2.45 | -0.56 | -3.08 | -3.72 | -  |
|           | 0.64       | -2.58      | -2.71 |       |       |       |       |       |       |    |
| GENE2017X | 18560_at   | 18560_at   | 1     | -0.76 | -0.81 | -1.42 | -0.05 | -1.66 | -1.43 | -  |
|           | 0.47       | -0.91      | -0.91 |       |       |       |       |       |       |    |
| GENE1759X | 17599_s_at | 17599_s_at | 1     | -0.7  | -0.88 | -1.95 | -0.58 | -2.49 | -1.79 | -  |
|           | 0.08       | -1.08      | -1.08 |       |       |       |       |       |       |    |
| GENE763X  | 14533_i_at | 14533_i_at | 1     | -0.79 | -1.52 | -1.61 | -0.05 | -2.05 | -2.53 | -  |
|           | 0.94       | -1.17      | -0.94 |       |       |       |       |       |       |    |
| GENE764X  | 14534_s_at | 14534_s_at | 1     | -0.66 | -1.3  | -1.45 | -0.41 | -2.2  | -2.03 | -  |
|           | 0.39       | -0.78      | -0.75 |       |       |       |       |       |       |    |
| GENE664X  | 14080_at   | 14080_at   | 1     | -0.69 | -1.23 | -1.41 | -0.54 | -1.99 | -2.18 | -  |
|           | 0.54       | -0.93      | -0.85 |       |       |       |       |       |       |    |
| GENE535X  | 13619_at   | 13619_at   | 1     | -1.26 | -2.44 | -2.9  | -0.95 | -3.76 | -3.76 | -1 |
|           | -2         | -2         |       |       |       |       |       |       |       |    |
| GENE923X  | 15057_at   | 15057_at   | 1     | -1.01 | -1.57 | -1.32 | -0.54 | -2.48 | -2.54 | -  |
|           | 0.78       | -1.24      | -1.19 |       |       |       |       |       |       |    |
| GENE1307X | 16118_s_at | 16118_s_at | 1     | -0.74 | -0.91 | -1    | -0.3  | -0.85 | -1.32 | -  |
|           | 0.09       | -0.57      | -0.7  |       |       |       |       |       |       |    |
| GENE778X  | 14572_at   | 14572_at   | 1     | -1.2  | -1.17 | -1.22 | -0.73 | -1.67 | -2.17 | -  |
|           | 0.37       | -1.08      | -1.29 |       |       |       |       |       |       |    |
| GENE1355X | 16296_at   | 16296_at   | 1     | -0.47 | -1.04 | -1.22 | -0.36 | -0.99 | -1.36 | -  |
|           | 0.14       | -0.52      | -0.78 |       |       |       |       |       |       |    |
| GENE1737X | 17555_s_at | 17555_s_at | 1     | -1.07 | -2.66 | -3    | -0.77 | -2.79 | -3.56 | -  |
|           | 0.76       | -1.76      | -2.47 |       |       |       |       |       |       |    |
| GENE1049X | 15407_at   | 15407_at   | 1     | -0.4  | -0.96 | -1.25 | -0.41 | -1.72 | -1.92 | -  |
|           | 0.25       | -0.94      | -1.12 |       |       |       |       |       |       |    |
| GENE7X    | 12001_at   | 12001_at   | 1     | -0.69 | -1.67 | -2.1  | -0.27 | -2.35 | -3.06 | -  |
|           | 0.29       | -1.67      | -1.83 |       |       |       |       |       |       |    |
| GENE738X  | 14482_at   | 14482_at   | 1     | -0.58 | -0.93 | -1.28 | -0.55 | -1.34 | -1.8  | -  |
|           | 0.46       | -1.15      | -0.89 |       |       |       |       |       |       |    |
| GENE701X  | 14387_g_at | 14387_g_at | 1     | -1.03 | -2.25 | -3.1  | -0.82 | -3.09 | -3.97 | -  |
|           | 1.22       | -2.67      | -2.41 |       |       |       |       |       |       |    |
| GENE2406X | 19947_at   | 19947_at   | 1     | -0.14 | -0.77 | -1.03 | 0.01  | -1.24 | -1.58 |    |
|           | 0.29       | -0.46      | -1.05 |       |       |       |       |       |       |    |
| GENE1997X | 18441_s_at | 18441_s_at | 1     | -0.37 | -0.67 | -1    | -0.01 | -1.32 | -1.57 |    |
|           | 0.43       | -0.92      | -1.52 |       |       |       |       |       |       |    |
| GENE662X  | 14075_at   | 14075_at   | 1     | -0.71 | -0.58 | -0.92 | -0.07 | -0.63 | -1.27 |    |
|           | 0.03       | -0.72      | -0.75 |       |       |       |       |       |       |    |
| GENE1130X | 15610_at   | 15610_at   | 1     | -1.11 | -0.83 | -1.22 | -0.14 | -1.24 | -2.14 |    |
|           | 0.27       | -0.75      | -1.68 |       |       |       |       |       |       |    |
| GENE775X  | 14557_at   | 14557_at   | 1     | -0.55 | -0.75 | -0.84 | -0.22 | -1.4  | -1.63 |    |
|           | 0.17       | -1.23      | -1.2  |       |       |       |       |       |       |    |
| GENE1440X | 16508_at   | 16508_at   | 1     | -0.4  | -0.81 | -0.86 | -0.01 | -1.18 | -1.33 |    |
|           | 0.11       | -1.1       | -1.03 |       |       |       |       |       |       |    |
| GENE183X  | 12532_at   | 12532_at   | 1     | -0.92 | -1.49 | -1.5  | -0.27 | -2.28 | -2.22 |    |
|           | 0.18       | -2.16      | -2.09 |       |       |       |       |       |       |    |
| GENE110X  | 12284_at   | 12284_at   | 1     | -0.69 | -1.38 | -1.65 | 0.39  | -1.9  | -2.32 |    |
|           | 0.35       | -2.14      | -2.02 |       |       |       |       |       |       |    |
| GENE1638X | 17215_at   | 17215_at   | 1     | -1.45 | -2.09 | -1.88 | 0.27  | -3.1  | -3.03 |    |
|           | 0.44       | -2.34      | -3.14 |       |       |       |       |       |       |    |
| GENE728X  | 14463_at   | 14463_at   | 1     | -0.18 | -0.9  | -1.12 | -0.18 | -1.14 | -1.29 |    |
|           | 0.02       | -1.31      | -1.18 |       |       |       |       |       |       |    |

|           |            |            |       |       |       |       |       |       |       |   |
|-----------|------------|------------|-------|-------|-------|-------|-------|-------|-------|---|
| GENE2389X | 19900_at   | 19900_at   | 1     | -0.32 | -1.35 | -1.26 | -0.56 | -1.74 | -1.77 | - |
|           | 0.04       | -2.14      | -1.85 |       |       |       |       |       |       |   |
| GENE1012X | 15213_s_at | 15213_s_at | 1     | -0.21 | -0.48 | -0.7  | -0.19 | -1.04 | -1.01 | - |
|           | 0.06       | -0.85      | -0.73 |       |       |       |       |       |       |   |
| GENE2244X | 19359_at   | 19359_at   | 1     | -0.73 | -1.39 | -1.52 | -0.46 | -2.3  | -2.13 | - |
|           | 0.32       | -1.85      | -1.7  |       |       |       |       |       |       |   |
| GENE1191X | 15826_at   | 15826_at   | 1     | -0.32 | -1.14 | -1.35 | -0.38 | -1.74 | -1.46 | - |
|           | 0.29       | -1.26      | -1.21 |       |       |       |       |       |       |   |
| GENE1768X | 17645_s_at | 17645_s_at | 1     | -0.51 | -0.8  | -1.17 | 0.44  | -1.51 | -1.73 | - |
|           | 0.58       | -1.37      | -1.27 |       |       |       |       |       |       |   |
| GENE2114X | 18829_at   | 18829_at   | 1     | -0.24 | -0.88 | -1.22 | 0.12  | -0.98 | -1.54 | - |
|           | 0.25       | -1.31      | -1.48 |       |       |       |       |       |       |   |
| GENE1268X | 16042_s_at | 16042_s_at | 1     | -0.36 | -0.93 | -1.35 | 0.2   | -1.76 | -1.9  | - |
|           | 0.62       | -1.79      | -2.12 |       |       |       |       |       |       |   |
| GENE41X   | 12102_at   | 12102_at   | 1     | -0.24 | -1.07 | -1.02 | -0.2  | -1.57 | -1.6  | - |
|           | 0.55       | -1.42      | -1.68 |       |       |       |       |       |       |   |
| GENE1919X | 18215_at   | 18215_at   | 1     | -0.71 | -2.09 | -2.09 | -0.35 | -3.2  | -3.05 | - |
|           | 0.98       | -2.57      | -2.95 |       |       |       |       |       |       |   |
| GENE1585X | 17018_s_at | 17018_s_at | 1     | -0.99 | -2.5  | -2.36 | -0.39 | -3.4  | -3.51 | - |
|           | 0.96       | -3.05      | -3.74 |       |       |       |       |       |       |   |
| GENE1764X | 17631_at   | 17631_at   | 1     | -0.44 | -0.71 | -1.19 | -0.21 | -1.67 | -1.42 | - |
|           | 0.58       | -1.32      | -1.58 |       |       |       |       |       |       |   |
| GENE62X   | 12155_at   | 12155_at   | 1     | -1.43 | -2.47 | -2.73 | -0.05 | -3.9  | -3.64 | - |
|           | 0.97       | -3.1       | -3.78 |       |       |       |       |       |       |   |
| GENE2281X | 19454_at   | 19454_at   | 1     | -0.41 | -1.08 | -1.46 | 0.04  | -2.04 | -1.71 | - |
|           | 0.23       | -1.87      | -1.71 |       |       |       |       |       |       |   |
| GENE2487X | 20173_at   | 20173_at   | 1     | -0.68 | -1.24 | -1.65 | -0.09 | -2.32 | -2.09 | - |
|           | 0.44       | -1.95      | -1.84 |       |       |       |       |       |       |   |
| GENE976X  | 15146_s_at | 15146_s_at | 1     | -0.75 | -1.2  | -1.61 | -0.01 | -2.06 | -2.11 | - |
|           | 0.32       | -2.13      | -2.35 |       |       |       |       |       |       |   |
| GENE521X  | 13596_at   | 13596_at   | 1     | -0.45 | -1.35 | -1.52 | 0     | -2.27 | -2.39 | - |
|           | 0.22       | -2.04      | -2.33 |       |       |       |       |       |       |   |
| GENE1693X | 17438_at   | 17438_at   | 1     | -0.44 | -1.06 | -0.97 | -0.05 | -1.53 | -1.53 | - |
|           | 0.21       | -1.54      | -1.36 |       |       |       |       |       |       |   |
| GENE2586X | 20442_i_at | 20442_i_at | 1     | -1.16 | -3.03 | -2.55 | -0.68 | -4.38 | -4.73 | - |
|           | 0.72       | -3.93      | -3.66 |       |       |       |       |       |       |   |
| GENE1505X | 16675_g_at | 16675_g_at | 1     | -1.36 | -0.89 | -1.3  | -0.54 | -0.97 | -0.25 | - |
|           | 0.37       | -0.75      | -0.85 |       |       |       |       |       |       |   |
| GENE1970X | 18308_i_at | 18308_i_at | 1     | -0.65 | -1.1  | -0.84 | -0.52 | -0.4  | -0.68 | - |
|           | 0.53       | -0.72      | -0.74 |       |       |       |       |       |       |   |
| GENE463X  | 13422_at   | 13422_at   | 1     | -0.63 | -1.02 | -1.02 | -0.76 | -0.46 | -0.3  | - |
|           | 0.72       | -0.69      | -0.81 |       |       |       |       |       |       |   |
| GENE1388X | 16380_at   | 16380_at   | 1     | -0.54 | -1.28 | -1.21 | -0.47 | -0.64 | -0.33 | - |
|           | 0.45       | -0.68      | -0.75 |       |       |       |       |       |       |   |
| GENE1504X | 16674_at   | 16674_at   | 1     | -0.83 | -1.02 | -1.31 | -0.58 | -0.94 | -0.73 | - |
|           | 0.35       | -0.82      | -0.93 |       |       |       |       |       |       |   |
| GENE754X  | 14512_r_at | 14512_r_at | 1     | -1.41 | -2.07 | -1.96 | -0.42 | -1.29 | -1.35 | - |
|           | 0.92       | -1.6       | -1.76 |       |       |       |       |       |       |   |
| GENE1573X | 16986_at   | 16986_at   | 1     | -1.53 | -1.64 | -1.7  | -0.62 | -1.66 | -0.92 | - |
|           | 1.15       | -1.2       | -1.73 |       |       |       |       |       |       |   |
| GENE2175X | 19030_at   | 19030_at   | 1     | -0.81 | -1.31 | -1.6  | 0.27  | -0.84 | -0.67 | - |
|           | 0.53       | -0.8       | -0.39 |       |       |       |       |       |       |   |
| GENE651X  | 14056_at   | 14056_at   | 1     | -0.62 | -1.2  | -1.05 | 0.04  | -0.57 | -0.51 | - |
|           | 0.24       | -0.54      | -0.44 |       |       |       |       |       |       |   |
| GENE309X  | 12983_at   | 12983_at   | 1     | -0.76 | -1.5  | -1.13 | -0.29 | -0.88 | -0.7  | - |
|           | 0.13       | -1.03      | -0.31 |       |       |       |       |       |       |   |

|           |            |            |       |       |       |       |       |       |       |   |
|-----------|------------|------------|-------|-------|-------|-------|-------|-------|-------|---|
| GENE2296X | 19522_at   | 19522_at   | 1     | -0.48 | -1.08 | -1.08 | -0.08 | -0.86 | -0.48 | - |
|           | 0.22       | -0.69      | -0.51 |       |       |       |       |       |       |   |
| GENE1389X | 16382_at   | 16382_at   | 1     | -0.9  | -1.75 | -1.5  | -0.27 | -1.04 | -0.88 | - |
|           | 0.38       | -1.1       | -0.73 |       |       |       |       |       |       |   |
| GENE50X   | 12124_at   | 12124_at   | 1     | -1.13 | -1.87 | -1.61 | -0.46 | -1.03 | -0.96 | - |
|           | 0.64       | -1.07      | -0.88 |       |       |       |       |       |       |   |
| GENE147X  | 12410_g_at | 12410_g_at | 1     | -0.88 | -1.08 | -1.17 | -0.46 | -0.5  | -0.57 | - |
|           | 0.43       | -0.63      | -0.2  |       |       |       |       |       |       |   |
| GENE35X   | 12088_at   | 12088_at   | 1     | -0.57 | -0.85 | -1.01 | -0.39 | -0.44 | -0.73 | - |
|           | 0.27       | -0.49      | -0.31 |       |       |       |       |       |       |   |
| GENE997X  | 15186_s_at | 15186_s_at | 1     | -0.79 | -1.65 | -2.13 | -1.04 | -1.34 | -0.76 | - |
|           | 0.88       | -1.01      | -0.57 |       |       |       |       |       |       |   |
| GENE2084X | 18696_s_at | 18696_s_at | 1     | -1.17 | -1.94 | -2.25 | -1.17 | -1.24 | -1.17 | - |
|           | 1.48       | -1.58      | -0.77 |       |       |       |       |       |       |   |
| GENE1524X | 16774_at   | 16774_at   | 1     | -0.68 | -0.83 | -1.16 | -0.37 | -0.66 | -0.76 | - |
|           | 0.28       | -0.2       | -0.45 |       |       |       |       |       |       |   |
| GENE305X  | 12964_at   | 12964_at   | 1     | -0.99 | -0.93 | -1.35 | -0.62 | -0.96 | -0.87 | - |
|           | 0.54       | -0.86      | -0.58 |       |       |       |       |       |       |   |
| GENE349X  | 13108_at   | 13108_at   | 1     | -1.15 | -1.27 | -1.3  | -0.55 | -1.24 | -1.17 | - |
|           | 0.55       | -1.08      | -0.73 |       |       |       |       |       |       |   |
| GENE452X  | 13344_s_at | 13344_s_at | 1     | -0.56 | -0.87 | -1.03 | -0.37 | -0.82 | -0.68 | - |
|           | 0.53       | -0.62      | -0.69 |       |       |       |       |       |       |   |
| GENE1200X | 15849_at   | 15849_at   | 1     | -1.45 | -1.74 | -2.93 | -0.79 | -1.74 | -1.91 | - |
|           | 1.58       | -1.58      | -1.53 |       |       |       |       |       |       |   |
| GENE1207X | 15880_at   | 15880_at   | 1     | -1.51 | -2.2  | -3.32 | -0.88 | -2.26 | -2.26 | - |
|           | 0.88       | -2.26      | -1.41 |       |       |       |       |       |       |   |
| GENE2451X | 20057_at   | 20057_at   | 1     | -0.79 | -1.32 | -1.37 | -0.36 | -1.33 | -0.32 | - |
|           | 0.14       | -1.23      | -0.28 |       |       |       |       |       |       |   |
| GENE2271X | 19429_at   | 19429_at   | 1     | -1.13 | -1.75 | -2.01 | -1.35 | -1.89 | -1.89 | - |
|           | 0.26       | -2         | -0.58 |       |       |       |       |       |       |   |
| GENE83X   | 12214_g_at | 12214_g_at | 1     | -0.55 | -1.1  | -1.21 | -0.31 | -1.43 | -0.78 | - |
|           | 0.35       | -0.68      | -0.17 |       |       |       |       |       |       |   |
| GENE2344X | 19710_s_at | 19710_s_at | 1     | -0.66 | -1.23 | -1.26 | -0.29 | -1.13 | -0.8  | - |
|           | 0.32       | -0.58      | -0.25 |       |       |       |       |       |       |   |
| GENE2671X | 20692_at   | 20692_at   | 1     | -0.72 | -1.28 | -0.97 | -0.36 | -1.43 | -1.17 | - |
|           | 0.36       | -1.09      | -0.48 |       |       |       |       |       |       |   |
| GENE2361X | 19833_s_at | 19833_s_at | 1     | -0.53 | -1    | -1.07 | -0.38 | -1.23 | -1.12 | - |
|           | 0.36       | -1.09      | -0.5  |       |       |       |       |       |       |   |
| GENE1271X | 16046_s_at | 16046_s_at | 1     | -0.84 | -1.05 | -1.13 | -0.22 | -1.28 | -0.94 | - |
|           | 0.25       | -0.78      | -0.6  |       |       |       |       |       |       |   |
| GENE2110X | 18798_at   | 18798_at   | 1     | -1.29 | -1.9  | -1.96 | -0.49 | -2.27 | -1.83 | - |
|           | 0.54       | -1.1       | -1.04 |       |       |       |       |       |       |   |
| GENE2345X | 19717_at   | 19717_at   | 1     | -1.13 | -1.75 | -1.75 | -0.44 | -2.56 | -1.75 | - |
|           | 0.38       | -1.58      | -1.08 |       |       |       |       |       |       |   |
| GENE900X  | 14995_at   | 14995_at   | 1     | -0.9  | -1.17 | -1.07 | -0.16 | -0.86 | -0.89 | - |
|           | 0.7        | -0.63      | -0.2  |       |       |       |       |       |       |   |
| GENE1692X | 17433_at   | 17433_at   | 1     | -0.69 | -1.04 | -0.97 | -0.09 | -1.3  | -1.14 | - |
|           | 0.88       | -0.68      | -0.64 |       |       |       |       |       |       |   |
| GENE384X  | 13162_at   | 13162_at   | 1     | -1.16 | -1.34 | -1.34 | 0.08  | -1.64 | -1.18 | - |
|           | 0.7        | -0.92      | -0.58 |       |       |       |       |       |       |   |
| GENE1436X | 16501_s_at | 16501_s_at | 1     | -1.68 | -2.12 | -2.28 | -0.52 | -2.43 | -2.02 | - |
|           | 1.52       | -1.73      | -0.91 |       |       |       |       |       |       |   |
| GENE1555X | 16942_at   | 16942_at   | 1     | -0.82 | -1.1  | -0.9  | -0.47 | -1    | -1.1  | - |
|           | 0.55       | -1.23      | -0.67 |       |       |       |       |       |       |   |
| GENE269X  | 12811_at   | 12811_at   | 1     | -0.63 | -1.09 | -0.9  | -0.29 | -0.95 | -1.03 | - |
|           | 0.36       | -0.97      | -0.7  |       |       |       |       |       |       |   |



|           |            |            |       |       |       |       |       |       |       |   |
|-----------|------------|------------|-------|-------|-------|-------|-------|-------|-------|---|
| GENE531X  | 13614_at   | 13614_at   | 1     | -0.92 | -1.73 | -2    | -0.5  | -2.04 | -1.9  | - |
|           | 1.29       | -2.7       | -1.89 |       |       |       |       |       |       |   |
| GENE2337X | 19691_at   | 19691_at   | 1     | -0.66 | -0.63 | -1.88 | 0.24  | -1    | -0.67 | - |
|           | 0.9        | -1.63      | -0.9  |       |       |       |       |       |       |   |
| GENE1059X | 15446_at   | 15446_at   | 1     | -0.37 | -0.49 | -1.05 | 0.01  | -0.66 | -0.22 | - |
|           | 0.5        | -0.88      | -1.02 |       |       |       |       |       |       |   |
| GENE166X  | 12477_at   | 12477_at   | 1     | 0     | -0.39 | -0.73 | -0.41 | -0.61 | -0.36 | - |
|           | 0.7        | -1.12      | -0.54 |       |       |       |       |       |       |   |
| GENE2621X | 20547_at   | 20547_at   | 1     | -0.42 | -0.95 | -1.48 | 0     | -0.67 | -1.19 | - |
|           | 1.04       | -1.78      | -1.14 |       |       |       |       |       |       |   |
| GENE712X  | 14418_at   | 14418_at   | 1     | -0.26 | -1.44 | -1.82 | -0.14 | -0.83 | -1.09 | - |
|           | 1.22       | -2.28      | -1.62 |       |       |       |       |       |       |   |
| GENE47X   | 12120_at   | 12120_at   | 1     | -0.45 | -0.84 | -1.05 | -0.46 | -0.82 | -1.14 | - |
|           | 1.09       | -1.67      | -1.47 |       |       |       |       |       |       |   |
| GENE2452X | 20058_at   | 20058_at   | 1     | -0.48 | -1.14 | -1.2  | -0.33 | -1.18 | -1.08 | - |
|           | 1.23       | -1.58      | -1.36 |       |       |       |       |       |       |   |
| GENE72X   | 12181_at   | 12181_at   | 1     | -0.35 | -0.86 | -1.2  | -0.2  | -1    | -0.78 | - |
|           | 0.95       | -0.78      | -0.09 |       |       |       |       |       |       |   |
| GENE628X  | 14010_at   | 14010_at   | 1     | -0.36 | -0.8  | -1.02 | 0.38  | -1    | -0.31 | - |
|           | 0.84       | -1         | -0.21 |       |       |       |       |       |       |   |
| GENE1734X | 17549_at   | 17549_at   | 1     | -0.77 | -3.53 | -1.39 | -1.38 | -2.76 | -1    | - |
|           | 1.83       | -1.05      | -2.32 |       |       |       |       |       |       |   |
| GENE2121X | 18877_at   | 18877_at   | 1     | -0.2  | -0.55 | -0.72 | -0.06 | -1.37 | -0.13 | - |
|           | 0.87       | -0.98      | -1.01 |       |       |       |       |       |       |   |
| GENE2058X | 18647_at   | 18647_at   | 1     | -0.61 | -1.19 | -1.08 | -0.21 | -1.46 | -0.52 | - |
|           | 1.63       | -1.14      | -1    |       |       |       |       |       |       |   |
| GENE1032X | 15366_at   | 15366_at   | 1     | -0.57 | -1.34 | -1.23 | -0.92 | -1.61 | -0.61 | - |
|           | 1.9        | -1.68      | -1.4  |       |       |       |       |       |       |   |
| GENE40X   | 12100_at   | 12100_at   | 1     | -0.12 | -1.25 | -0.82 | 0.43  | -2    | -1.32 | - |
|           | 2.07       | -1.07      | -2.07 |       |       |       |       |       |       |   |
| GENE419X  | 13252_s_at | 13252_s_at | 1     | -0.56 | -0.85 | -1.3  | -0.47 | -1.09 | -2.09 | - |
|           | 0.79       | -1.05      | -1.17 |       |       |       |       |       |       |   |
| GENE1640X | 17254_at   | 17254_at   | 1     | -0.7  | -1.56 | -2.11 | -0.25 | -2.16 | -3.09 | - |
|           | 1.53       | -1.95      | -2.05 |       |       |       |       |       |       |   |
| GENE2462X | 20090_at   | 20090_at   | 1     | -0.74 | -1.7  | -2    | -0.26 | -1.26 | -2.26 | - |
|           | 0.83       | -1.3       | -1.41 |       |       |       |       |       |       |   |
| GENE1293X | 16081_s_at | 16081_s_at | 1     | -1.49 | -1.82 | -1.76 | -0.57 | -1.5  | -2.44 | - |
|           | 1.07       | -1.56      | -1.88 |       |       |       |       |       |       |   |
| GENE1030X | 15344_at   | 15344_at   | 1     | -0.33 | -1    | -1.06 | -0.5  | -0.84 | -1.23 | - |
|           | 0.33       | -0.87      | -0.6  |       |       |       |       |       |       |   |
| GENE928X  | 15066_at   | 15066_at   | 1     | -0.68 | -1.45 | -1.5  | -0.45 | -1.26 | -1.77 | - |
|           | 0.77       | -1.26      | -0.8  |       |       |       |       |       |       |   |
| GENE1848X | 17995_s_at | 17995_s_at | 1     | -0.62 | -0.92 | -1.04 | -0.57 | -1.19 | -1.3  | - |
|           | 0.58       | -1.1       | -0.64 |       |       |       |       |       |       |   |
| GENE1347X | 16242_at   | 16242_at   | 1     | -1.28 | -1.61 | -1.92 | -0.95 | -1.93 | -2.06 | - |
|           | 0.87       | -1.5       | -1.47 |       |       |       |       |       |       |   |
| GENE2442X | 20024_s_at | 20024_s_at | 1     | -0.67 | -1.38 | -1.58 | -0.72 | -1.58 | -1.95 | - |
|           | 0.56       | -1.44      | -1.21 |       |       |       |       |       |       |   |
| GENE700X  | 14386_at   | 14386_at   | 1     | -1.43 | -2.71 | -2.61 | -1.25 | -3.1  | -3.52 | - |
|           | 0.94       | -2.12      | -2.03 |       |       |       |       |       |       |   |
| GENE1095X | 15529_at   | 15529_at   | 1     | -0.61 | -0.66 | -0.8  | -0.43 | -0.95 | -0.99 | - |
|           | 0.73       | -0.66      | -1.02 |       |       |       |       |       |       |   |
| GENE1527X | 16802_s_at | 16802_s_at | 1     | -0.76 | -1.08 | -1.13 | -0.64 | -1.54 | -1.41 | - |
|           | 1.14       | -1.25      | -1.49 |       |       |       |       |       |       |   |
| GENE755X  | 14513_s_at | 14513_s_at | 1     | -1.56 | -2.2  | -2.44 | -1.48 | -2.73 | -2.82 | - |
|           | 2.02       | -2.67      | -2.63 |       |       |       |       |       |       |   |

|           |            |            |       |       |       |       |       |       |       |   |
|-----------|------------|------------|-------|-------|-------|-------|-------|-------|-------|---|
| GENE2289X | 19466_s_at | 19466_s_at | 1     | -1.46 | -1.81 | -2.08 | -1.04 | -2.61 | -2.34 | - |
|           | 1.49       | -2.33      | -2.72 |       |       |       |       |       |       |   |
| GENE479X  | 13508_s_at | 13508_s_at | 1     | -1.13 | -1.2  | -1.35 | -1.13 | -1.51 | -1.87 | - |
|           | 1.2        | -1.71      | -1.78 |       |       |       |       |       |       |   |
| GENE665X  | 14081_at   | 14081_at   | 1     | -0.98 | -0.94 | -1.35 | -0.95 | -1.66 | -1.82 | - |
|           | 0.75       | -1.6       | -1.87 |       |       |       |       |       |       |   |
| GENE534X  | 13618_s_at | 13618_s_at | 1     | -1.09 | -1.27 | -1.41 | -1.17 | -1.72 | -2.04 | - |
|           | 0.97       | -1.87      | -2.21 |       |       |       |       |       |       |   |
| GENE2347X | 19734_at   | 19734_at   | 1     | -0.68 | -0.77 | -1.35 | -0.84 | -1.45 | -1.6  | - |
|           | 0.67       | -1.06      | -1.06 |       |       |       |       |       |       |   |
| GENE769X  | 14543_r_at | 14543_r_at | 1     | -1.22 | -1.56 | -2.77 | -0.89 | -3.21 | -3.36 | - |
|           | 1.52       | -2.37      | -2.3  |       |       |       |       |       |       |   |
| GENE2590X | 20452_s_at | 20452_s_at | 1     | -1.19 | -1.67 | -2.73 | -1.17 | -2.58 | -2.75 | - |
|           | 1.47       | -2.32      | -2.32 |       |       |       |       |       |       |   |
| GENE2092X | 18723_at   | 18723_at   | 1     | -1.61 | -2    | -3.37 | -1.67 | -3.67 | -3.41 | - |
|           | 2.1        | -3.58      | -2.9  |       |       |       |       |       |       |   |
| GENE2219X | 19200_s_at | 19200_s_at | 1     | -0.47 | -0.84 | -1.03 | -0.52 | -0.98 | -1.28 | - |
|           | 0.69       | -1.23      | -1    |       |       |       |       |       |       |   |
| GENE693X  | 14312_at   | 14312_at   | 1     | -1.26 | -2.43 | -3.21 | -1.18 | -2.8  | -4.18 | - |
|           | 2.15       | -3.62      | -3.62 |       |       |       |       |       |       |   |
| GENE929X  | 15070_at   | 15070_at   | 1     | -0.57 | -0.84 | -1.04 | -0.6  | -1.25 | -1.84 | - |
|           | 0.71       | -1.31      | -1.38 |       |       |       |       |       |       |   |
| GENE2060X | 18656_at   | 18656_at   | 1     | -1.25 | -2.44 | -2.22 | -1.32 | -3.14 | -4.26 | - |
|           | 2.15       | -3.15      | -3.29 |       |       |       |       |       |       |   |
| GENE2350X | 19752_s_at | 19752_s_at | 1     | -0.42 | -0.98 | -1.05 | -0.54 | -1.12 | -1.24 | - |
|           | 0.73       | -1.16      | -1.05 |       |       |       |       |       |       |   |
| GENE1486X | 16613_s_at | 16613_s_at | 1     | -1.19 | -2.45 | -2.97 | -0.98 | -2.94 | -3.09 | - |
|           | 1.94       | -2.94      | -2.75 |       |       |       |       |       |       |   |
| GENE1177X | 15769_at   | 15769_at   | 1     | -0.9  | -2.68 | -2.68 | -1.02 | -3.34 | -3.6  | - |
|           | 1.95       | -2.8       | -2.54 |       |       |       |       |       |       |   |
| GENE2502X | 20204_at   | 20204_at   | 1     | -0.43 | -1.17 | -1.43 | -0.64 | -1.38 | -1.65 | - |
|           | 0.74       | -1.43      | -1.46 |       |       |       |       |       |       |   |
| GENE2000X | 18471_at   | 18471_at   | 1     | -1.46 | -2.39 | -3.25 | -1.39 | -3.51 | -4.09 | - |
|           | 1.61       | -3.48      | -3.19 |       |       |       |       |       |       |   |
| GENE2598X | 20468_at   | 20468_at   | 1     | -0.9  | -2    | -2.47 | -1.14 | -3.22 | -3.36 | - |
|           | 1.59       | -2.61      | -2.87 |       |       |       |       |       |       |   |
| GENE2457X | 20063_at   | 20063_at   | 1     | -1    | -2.13 | -2.74 | -1.06 | -3.23 | -3.53 | - |
|           | 1.4        | -2.94      | -3.1  |       |       |       |       |       |       |   |
| GENE2231X | 19232_at   | 19232_at   | 1     | -1.14 | -2.48 | -2.93 | -1.24 | -3.59 | -3.3  | - |
|           | 1.8        | -3.12      | -3.39 |       |       |       |       |       |       |   |
| GENE1642X | 17275_i_at | 17275_i_at | 1     | -0.5  | -0.95 | -1.22 | -0.73 | -1.65 | -1.6  | - |
|           | 0.86       | -1.19      | -1.27 |       |       |       |       |       |       |   |
| GENE616X  | 13953_at   | 13953_at   | 1     | -0.7  | -1.3  | -1.62 | -1.08 | -2.32 | -2.63 | - |
|           | 0.87       | -1.85      | -1.9  |       |       |       |       |       |       |   |
| GENE2298X | 19545_at   | 19545_at   | 1     | -0.97 | -1.72 | -2.04 | -1.11 | -2.85 | -3.05 | - |
|           | 1.09       | -2.28      | -2.56 |       |       |       |       |       |       |   |
| GENE1731X | 17536_at   | 17536_at   | 1     | -0.85 | -1.66 | -1.56 | -0.77 | -2.05 | -2.51 | - |
|           | 1.11       | -1.5       | -1.73 |       |       |       |       |       |       |   |
| GENE1479X | 16598_s_at | 16598_s_at | 1     | -0.97 | -1.84 | -1.64 | -1    | -2.41 | -2.37 | - |
|           | 1.1        | -1.98      | -1.95 |       |       |       |       |       |       |   |
| GENE103X  | 12253_g_at | 12253_g_at | 1     | -0.45 | -0.9  | -1.06 | -0.63 | -1.7  | -1.57 | - |
|           | 0.93       | -1.31      | -1.39 |       |       |       |       |       |       |   |
| GENE2597X | 20467_at   | 20467_at   | 1     | -0.93 | -1.69 | -1.72 | -0.98 | -2.62 | -2.64 | - |
|           | 1.63       | -2.39      | -2.23 |       |       |       |       |       |       |   |
| GENE634X  | 14018_at   | 14018_at   | 1     | -1.23 | -1.74 | -2.04 | -1.17 | -3.17 | -3.49 | - |
|           | 1.89       | -2.37      | -2.82 |       |       |       |       |       |       |   |

|           |            |            |       |       |       |       |       |       |       |   |
|-----------|------------|------------|-------|-------|-------|-------|-------|-------|-------|---|
| GENE1390X | 16385_s_at | 16385_s_at | 1     | -1.03 | -1.79 | -1.89 | -0.71 | -2.91 | -3.18 | - |
|           | 1.82       | -2.35      | -2.64 |       |       |       |       |       |       |   |
| GENE2657X | 20648_at   | 20648_at   | 1     | -0.45 | -0.92 | -1.06 | -0.23 | -1.17 | -1.46 | - |
|           | 0.32       | -1.26      | -1.2  |       |       |       |       |       |       |   |
| GENE1366X | 16319_at   | 16319_at   | 1     | -0.5  | -1.35 | -1.49 | -0.35 | -1.67 | -1.74 | - |
|           | 0.52       | -1.94      | -1.77 |       |       |       |       |       |       |   |
| GENE1303X | 16110_s_at | 16110_s_at | 1     | -0.74 | -1.57 | -1.75 | -0.11 | -1.89 | -2.01 | - |
|           | 0.62       | -2         | -1.92 |       |       |       |       |       |       |   |
| GENE1493X | 16631_s_at | 16631_s_at | 1     | -1.01 | -1.36 | -1.75 | -0.41 | -1.75 | -2.06 | - |
|           | 0.59       | -1.97      | -1.95 |       |       |       |       |       |       |   |
| GENE2043X | 18611_at   | 18611_at   | 1     | -0.99 | -1.72 | -1.62 | -0.49 | -1.91 | -2.08 | - |
|           | 0.48       | -2.13      | -2.08 |       |       |       |       |       |       |   |
| GENE1341X | 16229_at   | 16229_at   | 1     | -1.7  | -2.74 | -2.61 | -0.22 | -3.07 | -3.19 | - |
|           | 0.67       | -3.98      | -2.71 |       |       |       |       |       |       |   |
| GENE2293X | 19494_at   | 19494_at   | 1     | -1.46 | -1.64 | -2.38 | -0.37 | -2.7  | -3.02 | - |
|           | 0.33       | -3.76      | -2.91 |       |       |       |       |       |       |   |
| GENE2242X | 19356_at   | 19356_at   | 1     | -0.19 | -0.77 | -0.61 | -0.07 | -0.82 | -0.82 | - |
|           | 0.46       | -1.15      | -0.86 |       |       |       |       |       |       |   |
| GENE547X  | 13644_at   | 13644_at   | 1     | -0.48 | -1.03 | -0.84 | -0.44 | -1.25 | -0.94 | - |
|           | 0.5        | -1.68      | -1.34 |       |       |       |       |       |       |   |
| GENE1925X | 18223_at   | 18223_at   | 1     | -0.45 | -0.76 | -0.95 | 0.02  | -1.08 | -0.98 | - |
|           | 0.54       | -1.17      | -1.13 |       |       |       |       |       |       |   |
| GENE1165X | 15676_at   | 15676_at   | 1     | -0.68 | -1.23 | -1.62 | -0.21 | -1.67 | -1.67 | - |
|           | 0.83       | -1.9       | -1.76 |       |       |       |       |       |       |   |
| GENE198X  | 12576_at   | 12576_at   | 1     | -0.57 | -1.48 | -1.68 | -0.05 | -1.58 | -1.72 | - |
|           | 1.03       | -2.24      | -1.91 |       |       |       |       |       |       |   |
| GENE1694X | 17439_g_at | 17439_g_at | 1     | -0.79 | -1.58 | -1.32 | -0.2  | -1.7  | -1.51 | - |
|           | 0.57       | -1.9       | -1.9  |       |       |       |       |       |       |   |
| GENE697X  | 14369_at   | 14369_at   | 1     | -1.02 | -1.86 | -1.94 | -0.41 | -2.19 | -2.05 | - |
|           | 1.06       | -2.58      | -2.91 |       |       |       |       |       |       |   |
| GENE2402X | 19933_g_at | 19933_g_at | 1     | -0.68 | -1.22 | -1.05 | -0.31 | -1.1  | -1.35 | - |
|           | 0.36       | -1.67      | -1.26 |       |       |       |       |       |       |   |
| GENE2401X | 19932_at   | 19932_at   | 1     | -0.86 | -1.3  | -1.28 | -0.39 | -1.18 | -1.51 | - |
|           | 0.51       | -1.61      | -1.31 |       |       |       |       |       |       |   |
| GENE736X  | 14480_at   | 14480_at   | 1     | -0.81 | -1.48 | -1.42 | -0.38 | -1.25 | -1.78 | - |
|           | 0.84       | -2.17      | -1.58 |       |       |       |       |       |       |   |
| GENE2434X | 20008_at   | 20008_at   | 1     | -0.51 | -0.77 | -0.92 | -0.08 | -0.62 | -0.79 | - |
|           | 0.44       | -1.08      | -1    |       |       |       |       |       |       |   |
| GENE1337X | 16210_at   | 16210_at   | 1     | -1.07 | -1.42 | -1.88 | -0.3  | -1.3  | -1.58 | - |
|           | 0.73       | -2.1       | -1.81 |       |       |       |       |       |       |   |
| GENE1507X | 16682_at   | 16682_at   | 1     | -1.02 | -1.37 | -1.51 | -0.33 | -1.26 | -1.49 | - |
|           | 0.87       | -1.75      | -1.75 |       |       |       |       |       |       |   |
| GENE1511X | 16693_at   | 16693_at   | 1     | -1.1  | -1.33 | -1.95 | -0.51 | -1.85 | -1.85 | - |
|           | 0.95       | -2.73      | -2.44 |       |       |       |       |       |       |   |
| GENE1X    | 11991_g_at | 11991_g_at | 1     | -0.85 | -1.43 | -1.61 | -0.27 | -1.38 | -1.69 | - |
|           | 0.66       | -1.79      | -1.69 |       |       |       |       |       |       |   |
| GENE1478X | 16595_s_at | 16595_s_at | 1     | -1.08 | -1.82 | -1.98 | -0.34 | -1.89 | -2.11 | - |
|           | 1.1        | -2.48      | -2.44 |       |       |       |       |       |       |   |
| GENE1074X | 15478_at   | 15478_at   | 1     | -0.45 | -0.93 | -0.93 | -0.25 | -0.75 | -1.02 | - |
|           | 0.58       | -0.96      | -1.11 |       |       |       |       |       |       |   |
| GENE523X  | 13601_at   | 13601_at   | 1     | -0.94 | -1.49 | -1.19 | -0.24 | -1.11 | -1.6  | - |
|           | 0.75       | -1.77      | -2.19 |       |       |       |       |       |       |   |
| GENE1064X | 15459_s_at | 15459_s_at | 1     | -1.03 | -1.8  | -1.6  | -0.34 | -2    | -2.4  | - |
|           | 0.93       | -2.67      | -2.81 |       |       |       |       |       |       |   |
| GENE1353X | 16286_at   | 16286_at   | 1     | -1.51 | -1.96 | -2.28 | -0.2  | -2.26 | -2.88 | - |
|           | 1.16       | -3.23      | -3.23 |       |       |       |       |       |       |   |

|           |            |            |       |       |       |       |       |       |       |   |
|-----------|------------|------------|-------|-------|-------|-------|-------|-------|-------|---|
| GENE143X  | 12387_at   | 12387_at   | 1     | -1.19 | -1.3  | -1.3  | -0.15 | -1.51 | -2.27 | - |
|           | 0.51       | -1.78      | -1.67 |       |       |       |       |       |       |   |
| GENE617X  | 13954_g_at | 13954_g_at | 1     | -1    | -1.76 | -1.56 | -0.24 | -1.92 | -2.92 | - |
|           | 1.11       | -2.43      | -2.43 |       |       |       |       |       |       |   |
| GENE710X  | 14416_at   | 14416_at   | 1     | -0.95 | -1.8  | -1.72 | -0.35 | -2.23 | -2.76 | - |
|           | 1.14       | -2.61      | -2.67 |       |       |       |       |       |       |   |
| GENE383X  | 13161_at   | 13161_at   | 1     | -0.94 | -1.69 | -1.98 | -0.17 | -2.18 | -2.69 | - |
|           | 0.91       | -2.7       | -2.7  |       |       |       |       |       |       |   |
| GENE2080X | 18689_s_at | 18689_s_at | 1     | -1    | -0.94 | -1.17 | -0.57 | -1.23 | -2.33 | - |
|           | 0.75       | -1.51      | -2.21 |       |       |       |       |       |       |   |
| GENE2294X | 19499_s_at | 19499_s_at | 1     | -0.97 | -1.07 | -1.23 | -0.21 | -1.3  | -2    | - |
|           | 0.57       | -1.45      | -2    |       |       |       |       |       |       |   |
| GENE361X  | 13124_at   | 13124_at   | 1     | -0.74 | -1.32 | -0.89 | -0.57 | -1.42 | -1.6  | - |
|           | 0.69       | -1.86      | -1.65 |       |       |       |       |       |       |   |
| GENE1600X | 17060_s_at | 17060_s_at | 1     | -1.93 | -2.2  | -1.2  | -1    | -2.41 | -2.67 | - |
|           | 1.7        | -3.22      | -3.05 |       |       |       |       |       |       |   |
| GENE2278X | 19447_s_at | 19447_s_at | 1     | -0.87 | -1.6  | -1    | -0.38 | -1.71 | -1.71 | - |
|           | 0.95       | -1.54      | -1.64 |       |       |       |       |       |       |   |
| GENE947X  | 15100_f_at | 15100_f_at | 1     | -1.43 | -1.67 | -1.68 | -0.48 | -2.12 | -1.99 | - |
|           | 1.07       | -1.86      | -2.39 |       |       |       |       |       |       |   |
| GENE941X  | 15092_at   | 15092_at   | 1     | -1.54 | -2.02 | -1.94 | -0.22 | -2.61 | -2.45 | - |
|           | 1.39       | -2.68      | -3.05 |       |       |       |       |       |       |   |
| GENE2263X | 19402_at   | 19402_at   | 1     | -0.75 | -1.11 | -1    | -0.24 | -1.13 | -1.35 | - |
|           | 0.81       | -1.52      | -1.43 |       |       |       |       |       |       |   |
| GENE1169X | 15685_s_at | 15685_s_at | 1     | -1.3  | -2.28 | -2    | -0.77 | -2.63 | -2.93 | - |
|           | 1.9        | -3.49      | -3.03 |       |       |       |       |       |       |   |
| GENE2107X | 18769_at   | 18769_at   | 1     | -0.74 | -1    | -1.21 | -0.31 | -1    | -1.56 | - |
|           | 1.1        | -1.79      | -1.4  |       |       |       |       |       |       |   |
| GENE1564X | 16965_at   | 16965_at   | 1     | -0.63 | -0.95 | -0.63 | -0.34 | -1.16 | -1.46 | - |
|           | 0.95       | -1.31      | -1.31 |       |       |       |       |       |       |   |
| GENE1743X | 17568_at   | 17568_at   | 1     | -1.02 | -1.27 | -1.28 | -0.74 | -2.03 | -2.39 | - |
|           | 1.52       | -2.09      | -2.19 |       |       |       |       |       |       |   |
| GENE2349X | 19749_at   | 19749_at   | 1     | -1.7  | -1.9  | -2.05 | -0.63 | -2.42 | -3.1  | - |
|           | 2.07       | -2.43      | -3.14 |       |       |       |       |       |       |   |
| GENE292X  | 12914_s_at | 12914_s_at | 1     | -0.64 | -1.06 | -1.18 | -0.48 | -1.25 | -1.48 | - |
|           | 0.47       | -1.25      | -1.73 |       |       |       |       |       |       |   |
| GENE637X  | 14022_s_at | 14022_s_at | 1     | -1.81 | -2.34 | -2.63 | -1.03 | -2.93 | -2.89 | - |
|           | 1.02       | -2.73      | -3.3  |       |       |       |       |       |       |   |
| GENE599X  | 13903_at   | 13903_at   | 1     | -1.68 | -2.49 | -2.72 | -1.56 | -2.85 | -2.91 | - |
|           | 1.33       | -2.89      | -3.71 |       |       |       |       |       |       |   |
| GENE1108X | 15553_at   | 15553_at   | 1     | -0.83 | -1.36 | -1.3  | -0.74 | -1.87 | -2.02 | - |
|           | 0.89       | -1.7       | -2.33 |       |       |       |       |       |       |   |
| GENE1024X | 15303_at   | 15303_at   | 1     | -1.5  | -2.11 | -2.55 | -0.88 | -3.29 | -3.56 | - |
|           | 1.7        | -2.6       | -4.08 |       |       |       |       |       |       |   |
| GENE1556X | 16949_s_at | 16949_s_at | 1     | -1.17 | -1.75 | -1.54 | -0.68 | -2.28 | -2.2  | - |
|           | 1.52       | -2.45      | -3.01 |       |       |       |       |       |       |   |
| GENE2498X | 20197_at   | 20197_at   | 1     | -1.11 | -1.96 | -1.82 | -1.03 | -2.35 | -2.48 | - |
|           | 1.49       | -2.74      | -3.52 |       |       |       |       |       |       |   |
| GENE1724X | 17520_s_at | 17520_s_at | 1     | -0.91 | -1.17 | -1.26 | -0.53 | -1.43 | -1.47 | - |
|           | 0.75       | -1.79      | -2.12 |       |       |       |       |       |       |   |
| GENE635X  | 14020_i_at | 14020_i_at | 1     | -1.33 | -1.57 | -2.03 | -0.84 | -2.51 | -2.6  | - |
|           | 1.15       | -2.98      | -3.63 |       |       |       |       |       |       |   |
| GENE636X  | 14021_r_at | 14021_r_at | 1     | -1.39 | -1.49 | -1.92 | -0.71 | -2.15 | -2.34 | - |
|           | 1.13       | -2.46      | -2.66 |       |       |       |       |       |       |   |
| GENE1569X | 16978_g_at | 16978_g_at | 1     | -0.72 | -1.37 | -1.95 | -0.52 | -1.94 | -3.1  | - |
|           | 1.77       | -2.54      | -3    |       |       |       |       |       |       |   |



|           |            |            |       |       |       |       |       |       |       |   |
|-----------|------------|------------|-------|-------|-------|-------|-------|-------|-------|---|
| GENE254X  | 12787_at   | 12787_at   | 1     | -1.29 | -1.45 | -1.63 | -0.16 | -2.41 | -3.21 | - |
|           | 1.8        | -2.64      | -3.18 |       |       |       |       |       |       |   |
| GENE2216X | 19197_at   | 19197_at   | 1     | -0.82 | -1.67 | -1.83 | -0.16 | -2.94 | -3.18 | - |
|           | 1.75       | -2.65      | -3.18 |       |       |       |       |       |       |   |
| GENE2180X | 19086_at   | 19086_at   | 1     | -0.95 | -2.1  | -2.1  | -0.49 | -3.11 | -3.11 | - |
|           | 1.49       | -3.07      | -3.56 |       |       |       |       |       |       |   |
| GENE1437X | 16502_at   | 16502_at   | 1     | -1.19 | -1.91 | -2.17 | -0.27 | -2.83 | -2.91 | - |
|           | 1.85       | -2.85      | -3.97 |       |       |       |       |       |       |   |
| GENE2520X | 20257_at   | 20257_at   | 1     | -1.18 | -1.74 | -2.67 | -0.3  | -2.09 | -2.55 | - |
|           | 1.86       | -2.4       | -3.78 |       |       |       |       |       |       |   |
| GENE1981X | 18343_at   | 18343_at   | 1     | -0.94 | -1.98 | -2.32 | -0.7  | -2.33 | -3.33 | - |
|           | 1.77       | -2.33      | -4    |       |       |       |       |       |       |   |
| GENE289X  | 12901_s_at | 12901_s_at | 1     | -0.08 | -0.38 | -1.02 | -0.65 | -0.65 | -1.18 | - |
|           | 0.51       | -0.97      | -0.58 |       |       |       |       |       |       |   |
| GENE657X  | 14067_at   | 14067_at   | 1     | -0.54 | -0.56 | -1.25 | -1.03 | -0.69 | -1.05 | - |
|           | 1.03       | -1.27      | -1.09 |       |       |       |       |       |       |   |
| GENE1480X | 16599_s_at | 16599_s_at | 1     | -0.69 | -0.51 | -0.97 | -1    | -0.75 | -1.29 | - |
|           | 0.75       | -1.2       | -1.25 |       |       |       |       |       |       |   |
| GENE15X   | 12022_at   | 12022_at   | 1     | -0.67 | -0.71 | -0.91 | -0.74 | -1.09 | -1.31 | - |
|           | 1.09       | -1.38      | -1.16 |       |       |       |       |       |       |   |
| GENE1160X | 15671_s_at | 15671_s_at | 1     | -0.83 | -1.42 | -1.23 | -1.26 | -1.88 | -2.12 | - |
|           | 1.75       | -2.05      | -1.58 |       |       |       |       |       |       |   |
| GENE2395X | 19913_at   | 19913_at   | 1     | -0.42 | -0.93 | -1.14 | -0.82 | -1.52 | -1.71 | - |
|           | 1.12       | -1.75      | -1.4  |       |       |       |       |       |       |   |
| GENE2565X | 20383_at   | 20383_at   | 1     | -1.06 | -1.56 | -1.49 | -0.97 | -2.6  | -2.76 | - |
|           | 2.72       | -3.45      | -2.34 |       |       |       |       |       |       |   |
| GENE1634X | 17196_at   | 17196_at   | 1     | -1.51 | -1.51 | -1.84 | -1.86 | -3.39 | -4.07 | - |
|           | 3.76       | -3.76      | -3.76 |       |       |       |       |       |       |   |
| GENE2176X | 19034_at   | 19034_at   | 1     | -1.43 | -1.91 | -2.04 | -2.25 | -3.19 | -3.78 | - |
|           | 3.67       | -4.1       | -4.02 |       |       |       |       |       |       |   |
| GENE2015X | 18549_s_at | 18549_s_at | 1     | -0.09 | -0.4  | -0.72 | -0.56 | -0.83 | -0.76 | - |
|           | 0.59       | -1.12      | -0.83 |       |       |       |       |       |       |   |
| GENE1086X | 15502_at   | 15502_at   | 1     | -0.67 | -0.94 | -1.49 | -0.83 | -1.79 | -1.63 | - |
|           | 1.34       | -2.92      | -1.92 |       |       |       |       |       |       |   |
| GENE889X  | 14961_at   | 14961_at   | 1     | -1.09 | -1.76 | -2    | -1.11 | -2.32 | -2.51 | - |
|           | 2.07       | -3.73      | -2.73 |       |       |       |       |       |       |   |
| GENE447X  | 13319_at   | 13319_at   | 1     | -0.43 | -1.06 | -1.06 | -0.63 | -1.49 | -1.12 | - |
|           | 0.94       | -1.29      | -1.56 |       |       |       |       |       |       |   |
| GENE133X  | 12348_at   | 12348_at   | 1     | -1.11 | -1.76 | -2.19 | -0.7  | -2.95 | -2.12 | - |
|           | 1.7        | -2.61      | -3.03 |       |       |       |       |       |       |   |
| GENE1707X | 17471_at   | 17471_at   | 1     | -0.39 | -0.81 | -0.8  | -0.31 | -1.17 | -1.08 | - |
|           | 0.67       | -1.1       | -1.11 |       |       |       |       |       |       |   |
| GENE1690X | 17427_at   | 17427_at   | 1     | -0.49 | -0.83 | -0.83 | -0.31 | -1.41 | -1.14 | - |
|           | 0.71       | -1.1       | -1.16 |       |       |       |       |       |       |   |
| GENE1866X | 18025_at   | 18025_at   | 1     | -0.79 | -1.28 | -1.24 | -0.46 | -2.04 | -1.93 | - |
|           | 1.4        | -1.95      | -1.84 |       |       |       |       |       |       |   |
| GENE467X  | 13438_at   | 13438_at   | 1     | -0.76 | -1.17 | -1.37 | -0.69 | -2.07 | -1.92 | - |
|           | 1.45       | -1.93      | -1.72 |       |       |       |       |       |       |   |
| GENE2607X | 20506_at   | 20506_at   | 1     | -0.62 | -1.19 | -1.51 | -0.69 | -2.23 | -2.09 | - |
|           | 1.45       | -1.98      | -1.98 |       |       |       |       |       |       |   |
| GENE1746X | 17576_at   | 17576_at   | 1     | -0.96 | -1.68 | -1.96 | -0.88 | -2.56 | -2.56 | - |
|           | 1.88       | -2.29      | -2.42 |       |       |       |       |       |       |   |
| GENE2025X | 18580_at   | 18580_at   | 1     | -0.56 | -1.02 | -1.08 | -0.53 | -1.59 | -1.61 | - |
|           | 0.92       | -1.66      | -1.26 |       |       |       |       |       |       |   |
| GENE1035X | 15369_at   | 15369_at   | 1     | -0.63 | -1.59 | -1.69 | -0.82 | -2.53 | -2.43 | - |
|           | 1.59       | -2.61      | -1.98 |       |       |       |       |       |       |   |

|           |            |            |       |       |       |       |       |       |       |   |
|-----------|------------|------------|-------|-------|-------|-------|-------|-------|-------|---|
| GENE330X  | 13044_at   | 13044_at   | 1     | -0.59 | -1.27 | -1.51 | -0.43 | -2    | -2    | - |
|           | 1.34       | -2         | -1.54 |       |       |       |       |       |       |   |
| GENE1747X | 17577_g_at | 17577_g_at | 1     | -0.86 | -1.64 | -2.09 | -0.78 | -2.5  | -2.38 | - |
|           | 1.72       | -2.58      | -2.13 |       |       |       |       |       |       |   |
| GENE2669X | 20688_at   | 20688_at   | 1     | -0.31 | -1.04 | -0.83 | -0.49 | -1.01 | -1.26 | - |
|           | 0.67       | -1.3       | -1.46 |       |       |       |       |       |       |   |
| GENE962X  | 15127_s_at | 15127_s_at | 1     | -0.36 | -0.76 | -0.69 | -0.51 | -0.87 | -1.21 | - |
|           | 0.74       | -1.08      | -1.28 |       |       |       |       |       |       |   |
| GENE454X  | 13353_at   | 13353_at   | 1     | -0.74 | -1.83 | -1.71 | -0.84 | -1.97 | -2.65 | - |
|           | 1.7        | -2.61      | -2.44 |       |       |       |       |       |       |   |
| GENE784X  | 14590_at   | 14590_at   | 1     | -0.56 | -0.95 | -1.06 | -0.77 | -1.28 | -1.73 | - |
|           | 1.05       | -2.01      | -1.86 |       |       |       |       |       |       |   |
| GENE1855X | 18009_s_at | 18009_s_at | 1     | -0.42 | -0.84 | -0.81 | -0.59 | -1.46 | -1.54 | - |
|           | 1.01       | -1.7       | -1.65 |       |       |       |       |       |       |   |
| GENE53X   | 12135_at   | 12135_at   | 1     | -0.5  | -1.56 | -1.52 | -1.01 | -2.84 | -2.96 | - |
|           | 2.05       | -3.31      | -3.57 |       |       |       |       |       |       |   |
| GENE2362X | 19834_at   | 19834_at   | 1     | -0.71 | -2.14 | -2.14 | -1.41 | -3.59 | -3.68 | - |
|           | 2.29       | -4.17      | -4.59 |       |       |       |       |       |       |   |
| GENE1871X | 18035_at   | 18035_at   | 1     | -0.4  | -1.25 | -1.46 | -0.8  | -2.09 | -2.68 | - |
|           | 1.8        | -3.07      | -2.93 |       |       |       |       |       |       |   |
| GENE1258X | 16019_at   | 16019_at   | 1     | -0.29 | -0.68 | -0.99 | -0.58 | -1.63 | -1.71 | - |
|           | 1.09       | -1.67      | -1.63 |       |       |       |       |       |       |   |
| GENE586X  | 13829_at   | 13829_at   | 1     | -0.31 | -0.5  | -0.74 | -0.36 | -1.21 | -1.28 | - |
|           | 0.72       | -1.38      | -1.33 |       |       |       |       |       |       |   |
| GENE768X  | 14542_i_at | 14542_i_at | 1     | -0.66 | -1.17 | -1.73 | -0.76 | -2.6  | -3.02 | - |
|           | 1.73       | -3.1       | -2.87 |       |       |       |       |       |       |   |
| GENE393X  | 13180_s_at | 13180_s_at | 1     | -0.59 | -0.87 | -1.24 | -0.72 | -1.9  | -1.88 | - |
|           | 1.29       | -1.82      | -1.96 |       |       |       |       |       |       |   |
| GENE1424X | 16480_at   | 16480_at   | 1     | -0.8  | -1.01 | -1.2  | -0.73 | -1.94 | -2.11 | - |
|           | 1.4        | -2.03      | -2.1  |       |       |       |       |       |       |   |
| GENE248X  | 12773_at   | 12773_at   | 1     | -0.82 | -1.02 | -1.04 | -0.79 | -1.85 | -2.16 | - |
|           | 1.38       | -2.06      | -2.42 |       |       |       |       |       |       |   |
| GENE477X  | 13492_at   | 13492_at   | 1     | -1.05 | -1.71 | -2.11 | -0.9  | -3.03 | -3.32 | - |
|           | 2.24       | -3.07      | -4.07 |       |       |       |       |       |       |   |
| GENE1963X | 18297_at   | 18297_at   | 1     | -0.43 | -1.01 | -0.9  | -0.29 | -1.35 | -1.44 | - |
|           | 0.84       | -1.54      | -1.23 |       |       |       |       |       |       |   |
| GENE1499X | 16650_s_at | 16650_s_at | 1     | -0.48 | -1.23 | -1.39 | -0.21 | -2.01 | -1.99 | - |
|           | 1.22       | -2.23      | -2    |       |       |       |       |       |       |   |
| GENE1309X | 16120_at   | 16120_at   | 1     | -0.96 | -1.64 | -1.73 | -0.58 | -2.81 | -2.81 | - |
|           | 1.83       | -3.17      | -2.86 |       |       |       |       |       |       |   |
| GENE2187X | 19125_s_at | 19125_s_at | 1     | -0.28 | -1.25 | -1.87 | -0.65 | -2.26 | -2.09 | - |
|           | 1.72       | -2.53      | -2.19 |       |       |       |       |       |       |   |
| GENE1843X | 17975_at   | 17975_at   | 1     | -0.77 | -2.33 | -2.53 | -0.92 | -2.82 | -3.1  | - |
|           | 2.1        | -3.38      | -3.45 |       |       |       |       |       |       |   |
| GENE753X  | 14509_g_at | 14509_g_at | 1     | -0.76 | -2    | -2.48 | -0.78 | -2.4  | -3.2  | - |
|           | 2.19       | -3.65      | -3.48 |       |       |       |       |       |       |   |
| GENE1139X | 15627_at   | 15627_at   | 1     | -0.39 | -0.52 | -0.59 | -0.19 | -0.94 | -1.04 | - |
|           | 0.95       | -1.14      | -0.46 |       |       |       |       |       |       |   |
| GENE1124X | 15599_s_at | 15599_s_at | 1     | -0.41 | -0.5  | -0.34 | -0.21 | -0.69 | -1.02 | - |
|           | 0.46       | -0.99      | -0.67 |       |       |       |       |       |       |   |
| GENE2459X | 20067_at   | 20067_at   | 1     | -0.7  | -1.13 | -1.24 | -0.65 | -2.29 | -2.29 | - |
|           | 1.45       | -2.59      | -1.97 |       |       |       |       |       |       |   |
| GENE281X  | 12861_s_at | 12861_s_at | 1     | -0.79 | -1.32 | -0.86 | -0.68 | -2.29 | -2.34 | - |
|           | 1.51       | -2.95      | -2.15 |       |       |       |       |       |       |   |
| GENE2228X | 19227_at   | 19227_at   | 1     | -0.41 | -0.74 | -1.02 | -0.15 | -1.2  | -1.56 | - |
|           | 0.63       | -1.32      | -1.27 |       |       |       |       |       |       |   |

|           |            |            |       |       |       |       |       |       |       |   |
|-----------|------------|------------|-------|-------|-------|-------|-------|-------|-------|---|
| GENE1718X | 17506_s_at | 17506_s_at | 1     | -0.37 | -0.62 | -0.8  | -0.11 | -1.12 | -1.43 | - |
|           | 0.59       | -1.39      | -1.3  |       |       |       |       |       |       |   |
| GENE203X  | 12604_at   | 12604_at   | 1     | -0.34 | -0.72 | -1.3  | -0.08 | -1.65 | -2.04 | - |
|           | 0.86       | -1.97      | -1.55 |       |       |       |       |       |       |   |
| GENE2506X | 20216_s_at | 20216_s_at | 1     | -0.84 | -1.26 | -1.91 | -0.65 | -2.01 | -3.26 | - |
|           | 1.33       | -2.84      | -1.84 |       |       |       |       |       |       |   |
| GENE2166X | 18977_at   | 18977_at   | 1     | -0.9  | -0.31 | -1    | -0.55 | -2    | -0.86 | - |
|           | 0.84       | -0.97      | -1.74 |       |       |       |       |       |       |   |
| GENE2433X | 20002_at   | 20002_at   | 1     | -0.63 | -0.9  | -0.84 | -0.41 | -1.49 | -1    | - |
|           | 0.62       | -0.66      | -1.36 |       |       |       |       |       |       |   |
| GENE1766X | 17642_at   | 17642_at   | 1     | -2.12 | -2    | -1.41 | -1.22 | -3.48 | -2.22 | - |
|           | 1.92       | -2.44      | -2.92 |       |       |       |       |       |       |   |
| GENE1230X | 15934_i_at | 15934_i_at | 1     | -1.43 | -0.66 | -1.29 | -0.34 | -1.44 | -1    | - |
|           | 0.63       | -1.25      | -1.74 |       |       |       |       |       |       |   |
| GENE1641X | 17257_s_at | 17257_s_at | 1     | -0.89 | -2.1  | -1.78 | -0.48 | -0.71 | -1.22 | - |
|           | 1.44       | -1.9       | -2.1  |       |       |       |       |       |       |   |
| GENE739X  | 14484_at   | 14484_at   | 1     | -1.39 | -3.32 | -3.32 | -1.18 | -1.64 | -2.32 | - |
|           | 3.37       | -3.37      | -3.37 |       |       |       |       |       |       |   |
| GENE2629X | 20573_at   | 20573_at   | 1     | -1.4  | -2.68 | -2.17 | -0.06 | -2.2  | -1.93 | - |
|           | 2.92       | -2.02      | -2.92 |       |       |       |       |       |       |   |
| GENE691X  | 14301_at   | 14301_at   | 1     | -0.66 | -0.78 | -0.76 | -0.3  | -0.58 | -0.86 | - |
|           | 0.91       | -1.2       | -0.97 |       |       |       |       |       |       |   |
| GENE1023X | 15271_at   | 15271_at   | 1     | -1.93 | -1.93 | -1.52 | -1.09 | -2.29 | -2.29 | - |
|           | 3.08       | -3.08      | -3.36 |       |       |       |       |       |       |   |
| GENE286X  | 12887_s_at | 12887_s_at | 1     | -0.43 | -1    | -0.64 | -0.77 | -0.77 | -1.03 | - |
|           | 1.42       | -1.79      | -1.35 |       |       |       |       |       |       |   |
| GENE411X  | 13233_at   | 13233_at   | 1     | -0.28 | -0.84 | -0.39 | -0.31 | -0.32 | -0.73 | - |
|           | 0.63       | -1.25      | -1.33 |       |       |       |       |       |       |   |
| GENE73X   | 12184_at   | 12184_at   | 1     | -0.63 | -0.73 | -1.03 | -0.66 | -0.82 | -1.2  | - |
|           | 1.6        | -2.2       | -2.35 |       |       |       |       |       |       |   |
| GENE2326X | 19653_g_at | 19653_g_at | 1     | -0.66 | -1.54 | -1.54 | -0.37 | -1.45 | -2.13 | - |
|           | 2.22       | -3.48      | -3.48 |       |       |       |       |       |       |   |
| GENE420X  | 13253_f_at | 13253_f_at | 1     | -0.09 | -0.26 | -0.91 | -0.59 | -0.73 | -1.32 | - |
|           | 0.89       | -1.22      | -1.32 |       |       |       |       |       |       |   |
| GENE2310X | 19617_at   | 19617_at   | 1     | -0.06 | -0.67 | -0.83 | -0.6  | -0.45 | -1.03 | - |
|           | 0.92       | -1.03      | -1.41 |       |       |       |       |       |       |   |
| GENE1657X | 17331_at   | 17331_at   | 1     | 0.15  | -1.11 | -1.53 | -1.02 | -1.06 | -2.06 | - |
|           | 1.21       | -1.86      | -2.86 |       |       |       |       |       |       |   |
| GENE310X  | 12984_at   | 12984_at   | 1     | -0.41 | -0.67 | -2    | -0.71 | -1.52 | -1.93 | - |
|           | 1.45       | -1.65      | -2.13 |       |       |       |       |       |       |   |
| GENE1319X | 16137_s_at | 16137_s_at | 1     | -0.53 | -1.16 | -2.43 | -0.71 | -2.07 | -2.22 | - |
|           | 2.46       | -2.71      | -3.54 |       |       |       |       |       |       |   |
| GENE930X  | 15074_s_at | 15074_s_at | 1     | -1    | -1.34 | -1.44 | -1.12 | -0.83 | -1.73 | - |
|           | 1.05       | -1.42      | -1.98 |       |       |       |       |       |       |   |
| GENE1876X | 18051_r_at | 18051_r_at | 1     | -0.62 | -1.32 | -1.22 | -0.54 | -1.24 | -1.58 | - |
|           | 1.18       | -1.74      | -2.25 |       |       |       |       |       |       |   |
| GENE1338X | 16214_at   | 16214_at   | 1     | -1    | -1.49 | -1.77 | -1.1  | -1.61 | -2.1  | - |
|           | 1.75       | -2.44      | -3.03 |       |       |       |       |       |       |   |
| GENE857X  | 14843_at   | 14843_at   | 1     | -0.84 | -1.05 | -1.37 | -0.89 | -1.34 | -1.72 | - |
|           | 0.72       | -1.98      | -2.33 |       |       |       |       |       |       |   |
| GENE1771X | 17660_at   | 17660_at   | 1     | -1.21 | -0.91 | -1.5  | -0.62 | -1    | -1.15 | - |
|           | 1.27       | -1.68      | -2.53 |       |       |       |       |       |       |   |
| GENE2145X | 18942_at   | 18942_at   | 1     | -0.42 | -0.63 | -0.73 | -0.02 | -0.5  | -1.14 | - |
|           | 0.1        | -0.22      | -0.49 |       |       |       |       |       |       |   |
| GENE2141X | 18933_at   | 18933_at   | 1     | -0.79 | -1.56 | -1.33 | -0.51 | -1.4  | -2.44 | - |
|           | 0.24       | -0.37      | -0.76 |       |       |       |       |       |       |   |

|           |            |            |       |       |       |       |       |       |       |    |
|-----------|------------|------------|-------|-------|-------|-------|-------|-------|-------|----|
| GENE109X  | 12280_g_at | 12280_g_at | 1     | -0.37 | -0.55 | -0.47 | -0.16 | -0.46 | -1.21 | -  |
|           | 0.14       | -0.16      | -0.68 |       |       |       |       |       |       |    |
| GENE1322X | 16145_at   | 16145_at   | 1     | -0.16 | -0.38 | -0.51 | -0.11 | -0.6  | -1    |    |
|           | 0.1        | -0.32      | -0.18 |       |       |       |       |       |       |    |
| GENE2392X | 19906_at   | 19906_at   | 1     | -0.39 | -0.67 | -0.7  | -0.55 | -1.42 | -2.47 | -  |
|           | 0.85       | -0.4       | -0.48 |       |       |       |       |       |       |    |
| GENE1457X | 16540_s_at | 16540_s_at | 1     | 0.01  | -0.27 | -0.39 | -0.24 | -0.73 | -1.21 | -  |
|           | 0.29       | -0.18      | -0.49 |       |       |       |       |       |       |    |
| GENE2329X | 19660_at   | 19660_at   | 1     | -0.7  | -1.58 | -1.24 | -1.57 | -4.2  | -4.49 | -  |
|           | 0.73       | -1.32      | -1.73 |       |       |       |       |       |       |    |
| GENE641X  | 14028_at   | 14028_at   | 1     | -0.3  | -0.1  | -1.71 | -0.96 | -1.62 | -1.55 | -  |
|           | 0.95       | -0.48      | -0.48 |       |       |       |       |       |       |    |
| GENE1483X | 16608_s_at | 16608_s_at | 1     | -0.48 | -0.3  | -0.31 | -0.4  | -0.89 | -1.09 | -  |
|           | 0.31       | -0.3       | -0.12 |       |       |       |       |       |       |    |
| GENE391X  | 13178_at   | 13178_at   | 1     | -0.54 | -0.31 | -0.29 | -0.92 | -1.07 | -1.83 | -  |
|           | 0.88       | -0.72      | -0.26 |       |       |       |       |       |       |    |
| GENE897X  | 14990_at   | 14990_at   | 1     | -0.56 | -1.42 | -1.02 | -1.39 | -2.27 | -1.85 | -1 |
|           | -0.8       | -1.34      |       |       |       |       |       |       |       |    |
| GENE1825X | 17936_s_at | 17936_s_at | 1     | -0.56 | -0.94 | -0.81 | -0.96 | -2.21 | -1.26 | -  |
|           | 0.34       | -0.83      | -0.83 |       |       |       |       |       |       |    |
| GENE2069X | 18670_g_at | 18670_g_at | 1     | -0.43 | -0.73 | -0.78 | -0.75 | -2.07 | -0.99 | -  |
|           | 0.47       | -0.55      | -1    |       |       |       |       |       |       |    |
| GENE1961X | 18290_at   | 18290_at   | 1     | -1.21 | -1.05 | -0.57 | -1.34 | -2.15 | -1.46 | -  |
|           | 0.48       | -0.92      | -0.97 |       |       |       |       |       |       |    |
| GENE627X  | 14009_at   | 14009_at   | 1     | -0.94 | -1.58 | -0.88 | -1.28 | -2.86 | -2.08 | 0  |
|           | -1.36      | -1.25      |       |       |       |       |       |       |       |    |
| GENE2274X | 19438_at   | 19438_at   | 1     | -0.24 | -0.59 | -0.54 | -0.38 | -1.06 | -0.99 | -  |
|           | 0.07       | -0.41      | -0.34 |       |       |       |       |       |       |    |
| GENE1538X | 16894_at   | 16894_at   | 1     | -0.53 | -0.73 | -0.63 | -0.68 | -1.19 | -1.17 | -  |
|           | 0.31       | -0.69      | -0.37 |       |       |       |       |       |       |    |
| GENE603X  | 13910_at   | 13910_at   | 1     | -0.69 | -1.02 | -1.02 | -0.73 | -1.67 | -1.73 | -  |
|           | 0.35       | -0.76      | -0.67 |       |       |       |       |       |       |    |
| GENE1842X | 17973_s_at | 17973_s_at | 1     | -0.92 | -0.92 | -1.23 | -0.75 | -1.93 | -2.02 | -  |
|           | 0.29       | -0.61      | -1.17 |       |       |       |       |       |       |    |
| GENE1113X | 15576_s_at | 15576_s_at | 1     | -1.05 | -1.5  | -1.73 | -1.47 | -2.75 | -2.58 | -  |
|           | 0.32       | -0.81      | -1.25 |       |       |       |       |       |       |    |
| GENE1698X | 17447_at   | 17447_at   | 1     | -0.64 | -0.96 | -0.87 | -0.51 | -0.92 | -1.25 | -  |
|           | 0.59       | -0.59      | -0.65 |       |       |       |       |       |       |    |
| GENE939X  | 15089_at   | 15089_at   | 1     | -0.67 | -1.01 | -0.88 | -0.6  | -0.95 | -1.03 | -  |
|           | 0.56       | -0.55      | -0.67 |       |       |       |       |       |       |    |
| GENE1105X | 15549_at   | 15549_at   | 1     | -0.68 | -1.2  | -0.87 | -0.45 | -1.36 | -1.23 | -  |
|           | 0.55       | -0.75      | -0.55 |       |       |       |       |       |       |    |
| GENE2208X | 19179_s_at | 19179_s_at | 1     | -0.56 | -0.8  | -0.53 | -0.27 | -1.07 | -0.88 | -  |
|           | 0.41       | -0.46      | -0.51 |       |       |       |       |       |       |    |
| GENE1966X | 18301_s_at | 18301_s_at | 1     | -1.52 | -2.95 | -2.1  | -0.91 | -3.45 | -2.95 | -  |
|           | 1.33       | -1.81      | -2.02 |       |       |       |       |       |       |    |
| GENE38X   | 12095_at   | 12095_at   | 1     | -2.08 | -2.32 | -1.76 | -1.79 | -2.58 | -2.4  | -  |
|           | 1.15       | -0.77      | -1.15 |       |       |       |       |       |       |    |
| GENE2479X | 20155_s_at | 20155_s_at | 1     | -0.09 | -0.4  | -0.76 | -0.36 | -1.03 | -0.69 | -  |
|           | 0.62       | -0.82      | -0.46 |       |       |       |       |       |       |    |
| GENE2280X | 19452_at   | 19452_at   | 1     | -0.25 | -0.62 | -0.96 | -0.64 | -0.87 | -0.83 | -  |
|           | 0.51       | -1.11      | -0.72 |       |       |       |       |       |       |    |
| GENE1649X | 17294_at   | 17294_at   | 1     | -0.53 | -1    | -1.58 | -1.18 | -1.83 | -1.32 | -  |
|           | 1.02       | -1.61      | -1.32 |       |       |       |       |       |       |    |
| GENE2519X | 20256_s_at | 20256_s_at | 1     | -0.94 | -1.13 | -1.39 | -0.89 | -2.33 | -1.47 | -  |
|           | 0.9        | -1.74      | -0.52 |       |       |       |       |       |       |    |

|           |            |            |       |       |       |       |       |       |       |   |
|-----------|------------|------------|-------|-------|-------|-------|-------|-------|-------|---|
| GENE1631X | 17183_s_at | 17183_s_at | 1     | -0.64 | -0.84 | -0.98 | -0.28 | -1.36 | -0.69 | - |
|           | 0.69       | -1.33      | -0.62 |       |       |       |       |       |       |   |
| GENE1756X | 17592_at   | 17592_at   | 1     | -0.69 | -1.1  | -0.94 | -0.08 | -1.59 | -1.44 | - |
|           | 0.41       | -1.21      | -0.66 |       |       |       |       |       |       |   |
| GENE512X  | 13572_s_at | 13572_s_at | 1     | -0.51 | -1    | -1.08 | -0.33 | -1.76 | -1.5  | - |
|           | 0.48       | -1.22      | -0.86 |       |       |       |       |       |       |   |
| GENE2X    | 11992_at   | 11992_at   | 1     | -0.82 | -1.24 | -1.21 | -0.65 | -2.04 | -1.83 | - |
|           | 0.53       | -1.47      | -1.1  |       |       |       |       |       |       |   |
| GENE1170X | 15689_at   | 15689_at   | 1     | -0.89 | -1.19 | -1.13 | -0.38 | -1.56 | -1.86 | - |
|           | 0.76       | -1.68      | -0.96 |       |       |       |       |       |       |   |
| GENE1102X | 15544_at   | 15544_at   | 1     | -1.54 | -1.49 | -1.71 | -0.33 | -2.58 | -2.03 | - |
|           | 0.88       | -2.12      | -1.56 |       |       |       |       |       |       |   |
| GENE530X  | 13613_at   | 13613_at   | 1     | -0.65 | -0.95 | -1.04 | -0.22 | -1.46 | -1.52 | - |
|           | 0.53       | -1.02      | -1.02 |       |       |       |       |       |       |   |
| GENE1226X | 15928_at   | 15928_at   | 1     | -1.3  | -1.71 | -1.71 | -0.6  | -2.36 | -2.25 | - |
|           | 1.11       | -2.02      | -1.7  |       |       |       |       |       |       |   |
| GENE1051X | 15411_at   | 15411_at   | 1     | -0.32 | -0.58 | -0.67 | -0.27 | -1.13 | -1.15 | - |
|           | 0.1        | -0.81      | -0.6  |       |       |       |       |       |       |   |
| GENE169X  | 12485_at   | 12485_at   | 1     | -0.29 | -0.7  | -0.62 | -0.29 | -1.52 | -1.45 | - |
|           | 0.25       | -1.16      | -0.85 |       |       |       |       |       |       |   |
| GENE1058X | 15441_at   | 15441_at   | 1     | -0.44 | -0.66 | -0.7  | -0.59 | -1.36 | -1.54 | - |
|           | 0.46       | -1.23      | -0.77 |       |       |       |       |       |       |   |
| GENE1071X | 15472_at   | 15472_at   | 1     | -0.77 | -1.42 | -1.56 | -1.17 | -2.57 | -2.72 | - |
|           | 0.94       | -2.27      | -1.44 |       |       |       |       |       |       |   |
| GENE2491X | 20187_at   | 20187_at   | 1     | -0.75 | -1.08 | -1.08 | -0.74 | -2.21 | -2.13 | - |
|           | 0.68       | -2.05      | -1.23 |       |       |       |       |       |       |   |
| GENE318X  | 13011_at   | 13011_at   | 1     | -0.59 | -1.32 | -1.78 | -0.41 | -3    | -2.86 | - |
|           | 1.13       | -1.64      | -1.46 |       |       |       |       |       |       |   |
| GENE716X  | 14430_g_at | 14430_g_at | 1     | -0.62 | -1.42 | -1.62 | -1.19 | -3.14 | -3.08 | - |
|           | 0.81       | -1.79      | -2    |       |       |       |       |       |       |   |
| GENE520X  | 13595_at   | 13595_at   | 1     | -0.27 | -0.61 | -0.79 | -0.57 | -1.59 | -1.42 | - |
|           | 0.55       | -1.1       | -0.94 |       |       |       |       |       |       |   |
| GENE1996X | 18439_s_at | 18439_s_at | 1     | -0.65 | -1.37 | -1.59 | -0.99 | -3.54 | -2.95 | - |
|           | 1.06       | -2.32      | -1.87 |       |       |       |       |       |       |   |
| GENE1619X | 17112_s_at | 17112_s_at | 1     | -0.27 | -0.72 | -0.97 | -0.49 | -1.35 | -1.14 | - |
|           | 0.39       | -0.85      | -0.42 |       |       |       |       |       |       |   |
| GENE1359X | 16302_at   | 16302_at   | 1     | -0.52 | -0.96 | -1.27 | -1.05 | -2.44 | -2.32 | - |
|           | 0.77       | -1.39      | -1.1  |       |       |       |       |       |       |   |
| GENE611X  | 13940_at   | 13940_at   | 1     | -0.38 | -0.59 | -0.67 | -0.55 | -1.06 | -1.14 | - |
|           | 0.34       | -0.7       | -0.57 |       |       |       |       |       |       |   |
| GENE859X  | 14867_at   | 14867_at   | 1     | -0.59 | -1.19 | -1.7  | -1.16 | -2.34 | -1.9  | - |
|           | 0.86       | -1.69      | -1.14 |       |       |       |       |       |       |   |
| GENE2643X | 20616_at   | 20616_at   | 1     | -0.55 | -1.6  | -1.85 | -1.07 | -2.64 | -2.09 | - |
|           | 1.09       | -2.02      | -1.46 |       |       |       |       |       |       |   |
| GENE1202X | 15862_at   | 15862_at   | 1     | -0.49 | -1.24 | -1.25 | -0.84 | -2.07 | -1.77 | - |
|           | 0.7        | -1.34      | -1.23 |       |       |       |       |       |       |   |
| GENE544X  | 13637_at   | 13637_at   | 1     | -1.08 | -1.96 | -2.03 | -1.24 | -2.88 | -2.82 | - |
|           | 1.19       | -1.79      | -1.83 |       |       |       |       |       |       |   |
| GENE70X   | 12176_at   | 12176_at   | 1     | -0.25 | -0.72 | -1.02 | -0.28 | -1.23 | -1.75 | - |
|           | 0.54       | -1.23      | -0.85 |       |       |       |       |       |       |   |
| GENE713X  | 14421_at   | 14421_at   | 1     | -0.46 | -1.18 | -1.6  | -0.23 | -1.92 | -2.32 | - |
|           | 1.07       | -1.53      | -1.07 |       |       |       |       |       |       |   |
| GENE2314X | 19627_s_at | 19627_s_at | 1     | -0.94 | -1.71 | -1.81 | -0.5  | -2.6  | -3.04 | - |
|           | 0.92       | -2.2       | -1.84 |       |       |       |       |       |       |   |
| GENE2313X | 19626_i_at | 19626_i_at | 1     | -0.82 | -1.82 | -1.7  | -0.44 | -2.37 | -2.83 | - |
|           | 0.73       | -2.32      | -2    |       |       |       |       |       |       |   |

|           |            |            |       |       |       |       |       |       |       |    |
|-----------|------------|------------|-------|-------|-------|-------|-------|-------|-------|----|
| GENE2171X | 18994_at   | 18994_at   | 1     | -0.96 | -1.83 | -2.02 | -0.56 | -3.11 | -3.43 | -  |
|           | 0.88       | -2.67      | -2.52 |       |       |       |       |       |       |    |
| GENE2431X | 19997_at   | 19997_at   | 1     | -0.35 | -1.06 | -1.38 | -0.19 | -1.98 | -1.84 | -  |
|           | 0.84       | -1.94      | -1.14 |       |       |       |       |       |       |    |
| GENE2079X | 18688_at   | 18688_at   | 1     | -0.34 | -1    | -1.18 | -0.45 | -1.73 | -1.59 | -  |
|           | 0.87       | -1.67      | -1.13 |       |       |       |       |       |       |    |
| GENE579X  | 13798_at   | 13798_at   | 1     | -0.77 | -1.49 | -1.77 | -0.66 | -3.07 | -2.69 | -  |
|           | 1.23       | -2.58      | -2.13 |       |       |       |       |       |       |    |
| GENE1740X | 17564_s_at | 17564_s_at | 1     | -0.54 | -1.09 | -0.74 | -0.92 | -1.5  | -2.01 | -  |
|           | 0.57       | -1.38      | -0.73 |       |       |       |       |       |       |    |
| GENE1068X | 15467_at   | 15467_at   | 1     | -0.96 | -1.49 | -1.21 | -1.34 | -2.13 | -2.04 | -  |
|           | 0.74       | -2.66      | -1.37 |       |       |       |       |       |       |    |
| GENE1853X | 18007_i_at | 18007_i_at | 1     | -0.22 | -0.89 | -0.73 | -0.4  | -1.03 | -1.06 | -  |
|           | 0.64       | -1         | -1.03 |       |       |       |       |       |       |    |
| GENE2499X | 20198_at   | 20198_at   | 1     | -0.47 | -0.96 | -0.84 | -0.65 | -1.22 | -1.03 | -  |
|           | 0.55       | -1.25      | -1.1  |       |       |       |       |       |       |    |
| GENE2563X | 20376_at   | 20376_at   | 1     | -0.34 | -1.54 | -1.34 | -0.77 | -1.72 | -1.48 | -  |
|           | 1.06       | -1.93      | -1.2  |       |       |       |       |       |       |    |
| GENE1018X | 15238_at   | 15238_at   | 1     | -1.14 | -3.35 | -1.97 | -0.62 | -3.26 | -2.94 | -  |
|           | 0.93       | -2.93      | -2.2  |       |       |       |       |       |       |    |
| GENE1367X | 16322_at   | 16322_at   | 1     | -1.05 | -3.53 | -2.85 | -0.83 | -3.56 | -3.56 | -  |
|           | 1.14       | -3.08      | -3.08 |       |       |       |       |       |       |    |
| GENE1924X | 18222_at   | 18222_at   | 1     | -0.85 | -1.32 | -1.15 | -1.45 | -2.06 | -1.35 | -  |
|           | 1.11       | -1.56      | -0.97 |       |       |       |       |       |       |    |
| GENE2024X | 18579_at   | 18579_at   | 1     | -1.53 | -2.09 | -1.99 | -1.75 | -3.65 | -2.81 | -  |
|           | 2.29       | -2.56      | -2.51 |       |       |       |       |       |       |    |
| GENE2111X | 18800_at   | 18800_at   | 1     | -1.56 | -1.79 | -1.98 | -1.53 | -2.53 | -1.79 | -  |
|           | 1.69       | -2.15      | -1.98 |       |       |       |       |       |       |    |
| GENE124X  | 12319_at   | 12319_at   | 1     | -2.12 | -2.8  | -2.8  | -2.24 | -3.37 | -3.37 | -  |
|           | 2.88       | -2.88      | -2.88 |       |       |       |       |       |       |    |
| GENE312X  | 12993_s_at | 12993_s_at | 1     | -0.33 | -0.72 | -1.1  | -1.08 | -1.02 | -0.86 | -  |
|           | 1.18       | -1.18      | -0.88 |       |       |       |       |       |       |    |
| GENE883X  | 14940_i_at | 14940_i_at | 1     | -0.68 | -0.75 | -1.88 | -1.58 | -1.76 | -1.5  | -  |
|           | 1.2        | -1.2       | -1.1  |       |       |       |       |       |       |    |
| GENE2332X | 19669_at   | 19669_at   | 1     | -0.75 | -0.84 | -1.06 | -0.97 | -1.2  | -1.44 | -  |
|           | 1.64       | -0.68      | -1.28 |       |       |       |       |       |       |    |
| GENE543X  | 13635_at   | 13635_at   | 1     | -1.19 | -1.79 | -2.01 | -1.32 | -1.86 | -1.61 | -  |
|           | 1.8        | -1.17      | -1.34 |       |       |       |       |       |       |    |
| GENE899X  | 14994_at   | 14994_at   | 1     | -1.13 | -1.87 | -2.61 | -1.67 | -1.67 | -2.19 | -  |
|           | 2.13       | -1.45      | -2.13 |       |       |       |       |       |       |    |
| GENE1046X | 15402_at   | 15402_at   | 1     | -0.39 | -0.78 | -0.78 | -0.9  | -0.86 | -1.34 | -  |
|           | 0.59       | -0.73      | -0.64 |       |       |       |       |       |       |    |
| GENE944X  | 15096_at   | 15096_at   | 1     | -0.37 | -0.81 | -1.06 | -1.24 | -1.1  | -1.5  | -1 |
|           | -0.66      | -1         |       |       |       |       |       |       |       |    |
| GENE1450X | 16529_at   | 16529_at   | 1     | -0.44 | -0.8  | -0.81 | -0.95 | -1.22 | -1.24 | -  |
|           | 0.63       | -0.78      | -1.28 |       |       |       |       |       |       |    |
| GENE1364X | 16312_at   | 16312_at   | 1     | -1.73 | -2    | -2.51 | -2.78 | -3.45 | -3.45 | -  |
|           | 3.07       | -2.42      | -3.56 |       |       |       |       |       |       |    |
| GENE854X  | 14808_i_at | 14808_i_at | 1     | -1.14 | -1.41 | -1.14 | -1.86 | -1.69 | -1.86 | -  |
|           | 1.32       | -1.5       | -2.48 |       |       |       |       |       |       |    |
| GENE869X  | 14899_at   | 14899_at   | 1     | -0.81 | -1.07 | -1.01 | -1    | -0.87 | -1.58 | -  |
|           | 0.9        | -1.13      | -0.5  |       |       |       |       |       |       |    |
| GENE992X  | 15179_s_at | 15179_s_at | 1     | -0.3  | -0.8  | -0.84 | -0.55 | -1    | -1.04 | -  |
|           | 0.76       | -0.71      | -0.5  |       |       |       |       |       |       |    |
| GENE820X  | 14677_r_at | 14677_r_at | 1     | -0.66 | -1.02 | -1.06 | -1.19 | -1.35 | -1.91 | -  |
|           | 1.64       | -1.31      | -0.77 |       |       |       |       |       |       |    |

|           |            |            |       |       |       |       |       |       |       |    |
|-----------|------------|------------|-------|-------|-------|-------|-------|-------|-------|----|
| GENE943X  | 15094_s_at | 15094_s_at | 1     | -1.22 | -1.73 | -1    | -0.9  | -2.08 | -2.47 | -  |
|           | 1.77       | -1.51      | -1.54 |       |       |       |       |       |       |    |
| GENE56X   | 12141_s_at | 12141_s_at | 1     | -0.3  | -0.57 | -0.56 | -1.01 | -1.18 | -1.37 | -  |
|           | 0.61       | -0.77      | -0.42 |       |       |       |       |       |       |    |
| GENE1602X | 17067_s_at | 17067_s_at | 1     | -0.11 | -0.36 | -0.58 | -0.68 | -1.19 | -1.48 | -  |
|           | 0.66       | -0.68      | -0.59 |       |       |       |       |       |       |    |
| GENE654X  | 14063_at   | 14063_at   | 1     | -0.07 | -0.47 | -0.6  | -0.98 | -1.63 | -2    | -  |
|           | 0.66       | -0.97      | -0.66 |       |       |       |       |       |       |    |
| GENE204X  | 12608_i_at | 12608_i_at | 1     | -0.17 | -1.34 | -2.12 | -1.71 | -2.84 | -2.84 | -  |
|           | 1.13       | -1.13      | -1.13 |       |       |       |       |       |       |    |
| GENE2012X | 18540_at   | 18540_at   | 1     | -0.02 | -0.34 | -0.43 | -0.29 | -0.73 | -1.12 | -  |
|           | 0.58       | -0.79      | -0.27 |       |       |       |       |       |       |    |
| GENE2224X | 19215_at   | 19215_at   | 1     | -0.16 | -0.72 | -0.66 | -0.28 | -1.57 | -1.3  | -  |
|           | 0.76       | -1.17      | -0.42 |       |       |       |       |       |       |    |
| GENE1709X | 17479_at   | 17479_at   | 1     | -0.03 | -0.57 | -0.47 | -0.29 | -1.25 | -1.31 | -  |
|           | 0.33       | -0.84      | -0.49 |       |       |       |       |       |       |    |
| GENE1128X | 15607_s_at | 15607_s_at | 1     | -0.17 | -0.72 | -1.06 | -0.35 | -2.44 | -1.48 | -  |
|           | 0.3        | -1.36      | -1    |       |       |       |       |       |       |    |
| GENE81X   | 12212_at   | 12212_at   | 1     | -0.58 | -1.63 | -2.11 | -0.62 | -4.38 | -3.02 | -  |
|           | 0.68       | -2.49      | -1.68 |       |       |       |       |       |       |    |
| GENE1680X | 17399_at   | 17399_at   | 1     | -0.09 | -0.49 | -0.63 | -0.6  | -1.59 | -1.06 | -  |
|           | 0.49       | -1.26      | -0.6  |       |       |       |       |       |       |    |
| GENE324X  | 13024_at   | 13024_at   | 1     | -0.36 | -0.39 | -0.48 | -0.51 | -1.62 | -1.59 | -  |
|           | 0.45       | -1.11      | -0.74 |       |       |       |       |       |       |    |
| GENE1208X | 15881_at   | 15881_at   | 1     | -0.35 | -0.49 | -0.52 | -0.72 | -1.57 | -1.59 | -  |
|           | 0.56       | -1.09      | -0.88 |       |       |       |       |       |       |    |
| GENE2398X | 19924_at   | 19924_at   | 1     | -0.58 | -1.03 | -1.03 | -0.89 | -2.89 | -3.11 | -1 |
|           | -2.66      | -1.66      |       |       |       |       |       |       |       |    |
| GENE979X  | 15153_at   | 15153_at   | 1     | -0.62 | -1.44 | -1.34 | -0.93 | -3.59 | -4.13 | -  |
|           | 1.36       | -2.58      | -2.17 |       |       |       |       |       |       |    |
| GENE1433X | 16495_at   | 16495_at   | 1     | -0.34 | -0.47 | -0.33 | -0.76 | -1.44 | -1.47 | -  |
|           | 0.34       | -1.15      | -0.96 |       |       |       |       |       |       |    |
| GENE444X  | 13301_at   | 13301_at   | 1     | -0.33 | -0.86 | -0.63 | -1.54 | -3.19 | -2.51 | -  |
|           | 0.83       | -2.45      | -1.6  |       |       |       |       |       |       |    |
| GENE236X  | 12749_at   | 12749_at   | 1     | -0.19 | -0.26 | -0.36 | -0.45 | -1.36 | -0.96 | -  |
|           | 0.6        | -1.06      | -0.88 |       |       |       |       |       |       |    |
| GENE1262X | 16030_s_at | 16030_s_at | 1     | -0.33 | -0.41 | -0.47 | -0.6  | -1.86 | -1.21 | -  |
|           | 0.61       | -1.29      | -1.01 |       |       |       |       |       |       |    |
| GENE2170X | 18985_g_at | 18985_g_at | 1     | -0.43 | -0.66 | -0.69 | -0.6  | -2.6  | -2.04 | -  |
|           | 1.13       | -1.39      | -1.13 |       |       |       |       |       |       |    |
| GENE2022X | 18573_at   | 18573_at   | 1     | -0.23 | -0.28 | -0.4  | -0.58 | -1.1  | -1.05 | -  |
|           | 0.31       | -0.8       | -0.35 |       |       |       |       |       |       |    |
| GENE246X  | 12768_at   | 12768_at   | 1     | -0.21 | -0.24 | -0.24 | -1    | -1.96 | -1.47 | -  |
|           | 0.7        | -1.22      | -0.6  |       |       |       |       |       |       |    |
| GENE2049X | 18626_at   | 18626_at   | 1     | -0.41 | -0.68 | -0.68 | -0.33 | -0.79 | -1.54 | -  |
|           | 0.11       | -0.96      | -0.81 |       |       |       |       |       |       |    |
| GENE570X  | 13698_at   | 13698_at   | 1     | -0.49 | -0.69 | -0.52 | -0.26 | -0.81 | -1.35 | -  |
|           | 0.23       | -0.78      | -0.91 |       |       |       |       |       |       |    |
| GENE1287X | 16067_at   | 16067_at   | 1     | -0.51 | -0.96 | -0.81 | -0.42 | -1.03 | -1.55 | -  |
|           | 0.39       | -0.91      | -1.01 |       |       |       |       |       |       |    |
| GENE596X  | 13884_at   | 13884_at   | 1     | -0.34 | -0.46 | -0.65 | -0.4  | -1    | -1.62 | -  |
|           | 0.13       | -0.87      | -1.18 |       |       |       |       |       |       |    |
| GENE2083X | 18694_s_at | 18694_s_at | 1     | -0.26 | -0.67 | -0.83 | -0.57 | -1.33 | -1.81 | -  |
|           | 0.05       | -1.12      | -1.21 |       |       |       |       |       |       |    |
| GENE251X  | 12782_r_at | 12782_r_at | 1     | -0.43 | -0.85 | -0.79 | -0.94 | -1.66 | -2.2  | -  |
|           | 0.1        | -0.9       | -1.45 |       |       |       |       |       |       |    |

|           |            |            |       |          |       |       |       |       |       |   |
|-----------|------------|------------|-------|----------|-------|-------|-------|-------|-------|---|
| GENE2584X | 20437_at   | 20437_at   | 1     | 0.13     | -0.92 | -0.96 | -1    | -1.26 | -2.1  | - |
|           | 0.39       | -1.3       | -0.97 |          |       |       |       |       |       |   |
| GENE2019X | 18565_i_at | 18565_i_at | 1     | 0.1      | -0.32 | -0.62 | -0.39 | -1.01 | -1.17 | - |
|           | 0.27       | -0.69      | -0.81 |          |       |       |       |       |       |   |
| GENE1087X | 15510_r_at | 15510_r_at | 1     | 0.15     | -0.71 | -0.94 | -0.69 | -1.4  | -1.38 | - |
|           | 0.69       | -1.18      | -1.11 |          |       |       |       |       |       |   |
| GENE2599X | 20474_at   | 20474_at   | 1     | 0.16     | -0.34 | -0.37 | -0.26 | -1.24 | -0.92 | - |
|           | 0.18       | -0.86      | -0.63 |          |       |       |       |       |       |   |
| GENE614X  | 13949_at   | 13949_at   | 1     | 0        | -1.1  | -0.44 | -0.9  | -3.6  | -2.6  | - |
|           | 0.16       | -2         | -2.18 |          |       |       |       |       |       |   |
| GENE250X  | 12781_at   | 12781_at   | 1     | -0.00114 |       | -0.39 | -0.6  | -0.23 | -1.44 | - |
|           | 1.35       | 0.09       | -1.23 | -1.15    |       |       |       |       |       |   |
| GENE401X  | 13209_s_at | 13209_s_at | 1     | -0.26    | -1.19 | -0.69 | -0.97 | -2.72 | -2.97 | - |
|           | 0.31       | -2.6       | -2.47 |          |       |       |       |       |       |   |
| GENE829X  | 14714_s_at | 14714_s_at | 1     | -0.01    | -0.26 | -0.57 | -0.09 | -1.53 | -1.42 | - |
|           | 0.42       | -1.17      | -1.12 |          |       |       |       |       |       |   |
| GENE2139X | 18929_s_at | 18929_s_at | 1     | 0.14     | -0.62 | -0.8  | -0.39 | -2.77 | -2.86 | - |
|           | 0.78       | -2.37      | -2.28 |          |       |       |       |       |       |   |
| GENE483X  | 13529_at   | 13529_at   | 1     | -0.31    | -0.25 | -0.36 | -0.31 | -1.93 | -1.84 | - |
|           | 0.58       | -1.58      | -1.75 |          |       |       |       |       |       |   |
| GENE2630X | 20576_at   | 20576_at   | 1     | -0.06    | -0.41 | -0.51 | -0.83 | -2.36 | -2.15 | - |
|           | 0.92       | -1.87      | -1.97 |          |       |       |       |       |       |   |
| GENE13X   | 12015_at   | 12015_at   | 1     | -0.27    | -0.5  | -0.89 | -0.95 | -2.39 | -2.26 | - |
|           | 0.91       | -2.04      | -2    |          |       |       |       |       |       |   |
| GENE2078X | 18687_at   | 18687_at   | 1     | -0.37    | -0.55 | -0.59 | -0.29 | -1.12 | -1.33 | - |
|           | 0.15       | -0.75      | -1.02 |          |       |       |       |       |       |   |
| GENE356X  | 13118_f_at | 13118_f_at | 1     | -0.5     | -0.95 | -0.71 | -0.23 | -1.56 | -1.63 | - |
|           | 0.05       | -0.93      | -1.36 |          |       |       |       |       |       |   |
| GENE263X  | 12798_at   | 12798_at   | 1     | -0.97    | -1.4  | -1.27 | -0.84 | -2.92 | -2.45 | - |
|           | 0.53       | -1.96      | -2.18 |          |       |       |       |       |       |   |
| GENE1762X | 17610_at   | 17610_at   | 1     | -0.53    | -1.05 | -1.53 | -1.14 | -3.35 | -2.67 | - |
|           | 0.34       | -1.63      | -2.48 |          |       |       |       |       |       |   |
| GENE1242X | 15987_at   | 15987_at   | 1     | -0.14    | -0.31 | -0.49 | -0.13 | -1.16 | -0.98 | - |
|           | 0.06       | -0.64      | -1.08 |          |       |       |       |       |       |   |
| GENE1577X | 16996_s_at | 16996_s_at | 1     | 0.01     | -1.09 | -1.03 | -0.46 | -2.97 | -2.37 | - |
|           | 0.36       | -1.74      | -2.63 |          |       |       |       |       |       |   |
| GENE2185X | 19116_i_at | 19116_i_at | 1     | -0.58    | -0.71 | -0.92 | -0.96 | -1.77 | -1.64 | - |
|           | 0.89       | -1.06      | -1.11 |          |       |       |       |       |       |   |
| GENE1104X | 15548_at   | 15548_at   | 1     | -0.85    | -1.16 | -1.16 | -1.4  | -2.88 | -2.88 | - |
|           | 1.78       | -1.63      | -1.63 |          |       |       |       |       |       |   |
| GENE918X  | 15045_at   | 15045_at   | 1     | -0.73    | -1.76 | -1.71 | -1.68 | -3.02 | -3.4  | - |
|           | 1.86       | -1.86      | -1.64 |          |       |       |       |       |       |   |
| GENE1328X | 16164_s_at | 16164_s_at | 1     | -0.96    | -1.2  | -1.16 | -0.97 | -2.71 | -2.49 | - |
|           | 0.93       | -1.12      | -1.68 |          |       |       |       |       |       |   |
| GENE2188X | 19127_at   | 19127_at   | 1     | -1.5     | -1.72 | -1.72 | -1.76 | -3.93 | -3.76 | - |
|           | 1.82       | -2.29      | -3.23 |          |       |       |       |       |       |   |
| GENE1091X | 15520_s_at | 15520_s_at | 1     | -0.62    | -0.41 | -0.54 | -0.7  | -1.26 | -1.55 | - |
|           | 0.54       | -0.96      | -0.7  |          |       |       |       |       |       |   |
| GENE704X  | 14396_s_at | 14396_s_at | 1     | -1.65    | -1.21 | -1.75 | -1.5  | -2.91 | -3.08 | - |
|           | 1.69       | -1.87      | -1.97 |          |       |       |       |       |       |   |
| GENE1867X | 18029_g_at | 18029_g_at | 1     | -0.36    | -0.61 | -0.19 | -0.83 | -1.23 | -1.11 | - |
|           | 0.7        | -0.58      | -0.97 |          |       |       |       |       |       |   |
| GENE965X  | 15131_s_at | 15131_s_at | 1     | -0.88    | -0.77 | -0.84 | -1.56 | -2.77 | -2.34 | - |
|           | 1.32       | -1.83      | -1.68 |          |       |       |       |       |       |   |
| GENE1190X | 15817_at   | 15817_at   | 1     | -1.9     | -1.49 | -0.79 | -2.09 | -3.67 | -3.67 | - |
|           | 1.84       | -2.84      | -3.1  |          |       |       |       |       |       |   |



|           |            |            |       |       |       |       |       |       |       |   |
|-----------|------------|------------|-------|-------|-------|-------|-------|-------|-------|---|
| GENE1149X | 15647_s_at | 15647_s_at | 1     | -1.03 | -1.15 | -0.5  | -0.5  | -1.41 | -1.99 | - |
|           | 0.7        | -0.91      | -1.58 |       |       |       |       |       |       |   |
| GENE1908X | 18154_at   | 18154_at   | 1     | -0.59 | -0.42 | -0.87 | -0.48 | -1.05 | -1.3  | - |
|           | 0.44       | -0.78      | -1.14 |       |       |       |       |       |       |   |
| GENE2172X | 19008_s_at | 19008_s_at | 1     | -0.87 | -0.89 | -1.91 | -0.82 | -2.85 | -3.23 | - |
|           | 1.11       | -1.63      | -2.7  |       |       |       |       |       |       |   |
| GENE981X  | 15160_s_at | 15160_s_at | 1     | -0.96 | -0.83 | -1.6  | -0.64 | -2.49 | -3.69 | - |
|           | 1.81       | -1.45      | -2.93 |       |       |       |       |       |       |   |
| GENE1787X | 17823_s_at | 17823_s_at | 1     | -1.14 | -1.35 | -1.78 | -0.94 | -3.1  | -4.48 | - |
|           | 2.82       | -2.23      | -3.36 |       |       |       |       |       |       |   |
| GENE1060X | 15451_at   | 15451_at   | 1     | -0.96 | -1.3  | -1.36 | -0.78 | -2    | -2.73 | - |
|           | 1.97       | -1.36      | -3.12 |       |       |       |       |       |       |   |
| GENE99X   | 12243_at   | 12243_at   | 1     | -0.66 | -1.32 | -1.22 | -0.8  | -2.9  | -3.05 | - |
|           | 1.22       | -1.9       | -2.22 |       |       |       |       |       |       |   |
| GENE594X  | 13876_at   | 13876_at   | 1     | -1.07 | -1.32 | -1.51 | -1.05 | -3.37 | -3.37 | - |
|           | 1.42       | -2.42      | -2.42 |       |       |       |       |       |       |   |
| GENE1193X | 15832_at   | 15832_at   | 1     | -0.89 | -1.19 | -1.64 | -1.15 | -3.25 | -3.72 | - |
|           | 1.5        | -2.79      | -2.54 |       |       |       |       |       |       |   |
| GENE908X  | 15024_at   | 15024_at   | 1     | -0.6  | -1.19 | -0.71 | -0.8  | -1.93 | -2.14 | - |
|           | 0.74       | -1.43      | -1.78 |       |       |       |       |       |       |   |
| GENE2165X | 18976_at   | 18976_at   | 1     | -0.58 | -1.22 | -0.74 | -0.59 | -2.67 | -2.83 | - |
|           | 0.94       | -2.28      | -2.48 |       |       |       |       |       |       |   |
| GENE672X  | 14098_at   | 14098_at   | 1     | -0.25 | -0.28 | -0.33 | -0.49 | -0.92 | -1.31 | - |
|           | 0.43       | -0.73      | -1.05 |       |       |       |       |       |       |   |
| GENE559X  | 13662_at   | 13662_at   | 1     | -0.25 | -0.46 | -0.42 | -0.48 | -1.22 | -1.55 | - |
|           | 0.57       | -0.99      | -1.06 |       |       |       |       |       |       |   |
| GENE984X  | 15163_s_at | 15163_s_at | 1     | -0.16 | -0.42 | -0.51 | -0.44 | -0.88 | -1.12 | - |
|           | 0.27       | -0.73      | -0.79 |       |       |       |       |       |       |   |
| GENE2081X | 18690_at   | 18690_at   | 1     | -0.59 | -0.98 | -0.95 | -1.01 | -1.89 | -2.33 | - |
|           | 0.67       | -1.52      | -2    |       |       |       |       |       |       |   |
| GENE1951X | 18276_at   | 18276_at   | 1     | -0.42 | -0.87 | -1    | -1.21 | -2.68 | -3.08 | - |
|           | 1.11       | -2.04      | -2.52 |       |       |       |       |       |       |   |
| GENE31X   | 12075_at   | 12075_at   | 1     | -0.27 | -0.57 | -0.83 | -0.75 | -1.53 | -1.89 | - |
|           | 0.77       | -1.38      | -1.63 |       |       |       |       |       |       |   |
| GENE375X  | 13151_g_at | 13151_g_at | 1     | -0.37 | -0.88 | -0.85 | -1.07 | -2.19 | -2.42 | - |
|           | 0.99       | -2.12      | -2.07 |       |       |       |       |       |       |   |
| GENE1678X | 17395_s_at | 17395_s_at | 1     | 0.08  | -0.34 | -0.62 | -0.45 | -1.06 | -1.5  | - |
|           | 0.39       | -1.34      | -1.02 |       |       |       |       |       |       |   |
| GENE872X  | 14907_at   | 14907_at   | 1     | -0.11 | -0.23 | -0.38 | -0.39 | -0.88 | -1.12 | - |
|           | 0.54       | -0.92      | -0.68 |       |       |       |       |       |       |   |
| GENE2346X | 19720_at   | 19720_at   | 1     | -0.22 | -0.47 | -0.44 | -0.76 | -1.73 | -2.73 | - |
|           | 1.12       | -1.88      | -1.76 |       |       |       |       |       |       |   |
| GENE1325X | 16160_f_at | 16160_f_at | 1     | -0.31 | -0.77 | -0.86 | -0.68 | -1.07 | -1.87 | - |
|           | 0.8        | -1.48      | -1.84 |       |       |       |       |       |       |   |
| GENE1231X | 15947_at   | 15947_at   | 1     | -0.48 | -0.63 | -0.95 | -0.91 | -1.7  | -2.5  | - |
|           | 0.91       | -1.88      | -2.32 |       |       |       |       |       |       |   |
| GENE2552X | 20340_at   | 20340_at   | 1     | -0.36 | -0.7  | -0.97 | -0.46 | -1.75 | -2.43 | - |
|           | 0.74       | -1.7       | -1.95 |       |       |       |       |       |       |   |
| GENE1427X | 16485_s_at | 16485_s_at | 1     | -0.4  | -0.98 | -1.42 | -0.76 | -2.5  | -3.94 | - |
|           | 1.57       | -2.57      | -3.16 |       |       |       |       |       |       |   |
| GENE1052X | 15412_at   | 15412_at   | 1     | -0.13 | -0.38 | -0.48 | -0.23 | -0.49 | -1.02 | - |
|           | 0.31       | -0.78      | -0.77 |       |       |       |       |       |       |   |
| GENE2315X | 19632_at   | 19632_at   | 1     | -0.19 | -0.15 | -0.69 | -0.14 | -0.9  | -1.33 | - |
|           | 0.52       | -0.78      | -0.76 |       |       |       |       |       |       |   |
| GENE781X  | 14578_s_at | 14578_s_at | 1     | -0.11 | -0.14 | -0.46 | -0.62 | -1.27 | -1.27 | - |
|           | 0.57       | -0.84      | -0.88 |       |       |       |       |       |       |   |

|           |            |            |       |          |       |       |       |       |       |   |
|-----------|------------|------------|-------|----------|-------|-------|-------|-------|-------|---|
| GENE421X  | 13254_at   | 13254_at   | 1     | -0.12    | -0.34 | -0.7  | -0.81 | -1.68 | -1.99 | - |
|           | 1.08       | -1.31      | -1.25 |          |       |       |       |       |       |   |
| GENE12X   | 12011_s_at | 12011_s_at | 1     | -0.1     | -0.27 | -0.5  | -0.5  | -0.86 | -1.19 | - |
|           | 0.51       | -0.63      | -0.94 |          |       |       |       |       |       |   |
| GENE1671X | 17385_at   | 17385_at   | 1     | -0.17    | -0.4  | -0.62 | -0.35 | -1.04 | -1.27 | - |
|           | 0.51       | -0.79      | -0.93 |          |       |       |       |       |       |   |
| GENE1473X | 16583_s_at | 16583_s_at | 1     | -0.11    | -1.18 | -1.75 | -1.28 | -3.09 | -3.27 | - |
|           | 1.43       | -2.17      | -2.65 |          |       |       |       |       |       |   |
| GENE1466X | 16564_s_at | 16564_s_at | 1     | -0.23    | -0.23 | -0.4  | -0.39 | -0.46 | -1.01 | - |
|           | 0.55       | -0.66      | -0.63 |          |       |       |       |       |       |   |
| GENE1572X | 16983_at   | 16983_at   | 1     | -0.45    | -0.49 | -0.81 | -0.8  | -1.22 | -1.77 | - |
|           | 0.93       | -1.25      | -1.22 |          |       |       |       |       |       |   |
| GENE560X  | 13663_s_at | 13663_s_at | 1     | -0.55    | -0.78 | -0.94 | -0.91 | -1.68 | -2.08 | - |
|           | 1.09       | -1.37      | -1.89 |          |       |       |       |       |       |   |
| GENE2249X | 19370_at   | 19370_at   | 1     | -0.83    | -1.23 | -1.34 | -1.36 | -2.3  | -2.58 | - |
|           | 1.33       | -2.11      | -2.11 |          |       |       |       |       |       |   |
| GENE331X  | 13052_s_at | 13052_s_at | 1     | -0.56    | -0.86 | -0.67 | -0.63 | -1.56 | -2.25 | - |
|           | 1.58       | -1.66      | -1.92 |          |       |       |       |       |       |   |
| GENE1580X | 17003_at   | 17003_at   | 1     | -0.75    | -0.48 | -1.08 | -0.8  | -1.95 | -2.11 | - |
|           | 1.78       | -1.84      | -2.1  |          |       |       |       |       |       |   |
| GENE207X  | 12611_g_at | 12611_g_at | 1     | -0.28    | -0.8  | -1.12 | -0.47 | -2.1  | -1.93 | - |
|           | 0.39       | -1.94      | -2.53 |          |       |       |       |       |       |   |
| GENE527X  | 13608_at   | 13608_at   | 1     | -0.18    | -0.97 | -0.97 | -0.36 | -2.23 | -1.93 | - |
|           | 0.86       | -2.24      | -2.32 |          |       |       |       |       |       |   |
| GENE1508X | 16687_at   | 16687_at   | 1     | -0.00305 |       | -0.28 | -0.59 | -0.25 | -0.69 | - |
|           | 0.82       | -0.32      | -1    | -1.06    |       |       |       |       |       |   |
| GENE1434X | 16497_at   | 16497_at   | 1     | -0.22    | -0.47 | -0.78 | -0.67 | -1.68 | -2.12 | - |
|           | 0.67       | -1.64      | -2.03 |          |       |       |       |       |       |   |
| GENE1241X | 15986_s_at | 15986_s_at | 1     | -0.28    | -0.47 | -0.84 | -0.61 | -1.83 | -2.24 | - |
|           | 0.84       | -1.76      | -2.2  |          |       |       |       |       |       |   |
| GENE1407X | 16443_at   | 16443_at   | 1     | -0.4     | -0.73 | -0.93 | -0.81 | -2.02 | -2.25 | - |
|           | 0.77       | -1.91      | -2.31 |          |       |       |       |       |       |   |
| GENE1107X | 15552_at   | 15552_at   | 1     | -0.31    | -0.73 | -0.97 | -0.69 | -2.25 | -2.35 | - |
|           | 0.89       | -1.84      | -2.53 |          |       |       |       |       |       |   |
| GENE1257X | 16018_s_at | 16018_s_at | 1     | -0.33    | -0.72 | -0.97 | -0.65 | -2.23 | -2.49 | - |
|           | 0.94       | -2.15      | -2.69 |          |       |       |       |       |       |   |
| GENE374X  | 13150_at   | 13150_at   | 1     | -0.11    | -0.5  | -0.57 | -0.74 | -1.64 | -1.75 | - |
|           | 0.7        | -1.71      | -1.79 |          |       |       |       |       |       |   |
| GENE2415X | 19964_g_at | 19964_g_at | 1     | -0.3     | -0.73 | -1.03 | -0.88 | -2.46 | -2.71 | - |
|           | 1.22       | -2.39      | -2.51 |          |       |       |       |       |       |   |
| GENE253X  | 12785_at   | 12785_at   | 1     | -0.39    | -0.92 | -1.25 | -1.16 | -2.81 | -3.05 | - |
|           | 1.23       | -2.68      | -2.9  |          |       |       |       |       |       |   |
| GENE1688X | 17420_at   | 17420_at   | 1     | -0.31    | -0.89 | -1.33 | -0.88 | -2.81 | -3.13 | - |
|           | 1.19       | -2.67      | -3    |          |       |       |       |       |       |   |
| GENE370X  | 13142_at   | 13142_at   | 1     | -0.42    | -0.75 | -0.93 | -0.85 | -1.91 | -1.96 | - |
|           | 0.69       | -1.7       | -2.42 |          |       |       |       |       |       |   |
| GENE1605X | 17084_s_at | 17084_s_at | 1     | -0.4     | -0.62 | -0.73 | -0.68 | -1.18 | -1.56 | - |
|           | 0.63       | -1.31      | -1.51 |          |       |       |       |       |       |   |
| GENE64X   | 12166_i_at | 12166_i_at | 1     | -0.82    | -1.2  | -1.52 | -1.19 | -2.38 | -2.73 | - |
|           | 1.09       | -2.49      | -2.88 |          |       |       |       |       |       |   |
| GENE777X  | 14571_at   | 14571_at   | 1     | -0.36    | -0.65 | -0.76 | -0.45 | -1.7  | -1.94 | - |
|           | 0.83       | -2.02      | -2.42 |          |       |       |       |       |       |   |
| GENE1817X | 17916_at   | 17916_at   | 1     | -0.53    | -1.08 | -1.17 | -0.67 | -2.37 | -2.61 | - |
|           | 1.17       | -2.86      | -3.11 |          |       |       |       |       |       |   |
| GENE2300X | 19548_at   | 19548_at   | 1     | -0.34    | -0.88 | -1.41 | -0.62 | -2.32 | -2.86 | - |
|           | 1.06       | -2.79      | -3.32 |          |       |       |       |       |       |   |

|           |            |            |       |       |       |       |       |       |       |   |
|-----------|------------|------------|-------|-------|-------|-------|-------|-------|-------|---|
| GENE172X  | 12496_at   | 12496_at   | 1     | -0.03 | -0.45 | -0.65 | -0.39 | -1.23 | -1.36 | - |
|           | 0.61       | -1.61      | -1.61 |       |       |       |       |       |       |   |
| GENE1244X | 15990_at   | 15990_at   | 1     | -0.14 | -0.61 | -1.04 | -0.34 | -2.33 | -2.64 | - |
|           | 1.17       | -2.44      | -3.01 |       |       |       |       |       |       |   |
| GENE93X   | 12234_at   | 12234_at   | 1     | -0.17 | -0.34 | -0.74 | -0.18 | -1.2  | -1.39 | - |
|           | 0.74       | -1.42      | -1.61 |       |       |       |       |       |       |   |
| GENE1959X | 18288_at   | 18288_at   | 1     | -0.31 | -0.69 | -1.08 | -0.13 | -1.82 | -2.18 | - |
|           | 1.16       | -2.36      | -2.7  |       |       |       |       |       |       |   |
| GENE2094X | 18733_r_at | 18733_r_at | 1     | -0.31 | -0.45 | -0.74 | -0.41 | -1.66 | -2.08 | - |
|           | 1.01       | -1.81      | -1.97 |       |       |       |       |       |       |   |
| GENE2096X | 18736_at   | 18736_at   | 1     | -0.43 | -0.6  | -0.82 | -0.66 | -1.83 | -2.25 | - |
|           | 1.2        | -2.13      | -2.42 |       |       |       |       |       |       |   |
| GENE2416X | 19968_at   | 19968_at   | 1     | -0.72 | -1.44 | -1.66 | -1.14 | -3.52 | -4.52 | - |
|           | 2.38       | -4.65      | -4.65 |       |       |       |       |       |       |   |
| GENE321X  | 13020_at   | 13020_at   | 1     | -0.41 | -0.62 | -0.85 | -0.51 | -1.81 | -2.28 | - |
|           | 0.91       | -2.36      | -2.41 |       |       |       |       |       |       |   |
| GENE782X  | 14579_at   | 14579_at   | 1     | -0.38 | -0.75 | -0.98 | -0.7  | -2.13 | -2.51 | - |
|           | 1.13       | -2.51      | -2.63 |       |       |       |       |       |       |   |
| GENE127X  | 12336_at   | 12336_at   | 1     | -0.41 | -0.73 | -0.92 | -0.81 | -2.41 | -2.69 | - |
|           | 1.05       | -2.79      | -2.79 |       |       |       |       |       |       |   |
| GENE2448X | 20050_at   | 20050_at   | 1     | -0.13 | -0.6  | -0.84 | -0.6  | -1.74 | -2.17 | - |
|           | 0.89       | -2.02      | -2.35 |       |       |       |       |       |       |   |
| GENE1677X | 17394_s_at | 17394_s_at | 1     | -0.21 | -0.78 | -0.99 | -0.69 | -2.26 | -2.56 | - |
|           | 0.98       | -2.46      | -2.78 |       |       |       |       |       |       |   |
| GENE1701X | 17454_at   | 17454_at   | 1     | -0.3  | -0.65 | -0.92 | -0.75 | -2.17 | -2.46 | - |
|           | 1.13       | -2.34      | -2.76 |       |       |       |       |       |       |   |
| GENE2414X | 19963_at   | 19963_at   | 1     | -0.19 | -0.57 | -1.02 | -0.63 | -2.12 | -2.51 | - |
|           | 1.03       | -2.47      | -2.64 |       |       |       |       |       |       |   |
| GENE3X    | 11994_at   | 11994_at   | 1     | -0.29 | -0.79 | -1.58 | -1.1  | -2.93 | -3.7  | - |
|           | 1.57       | -3.51      | -3.68 |       |       |       |       |       |       |   |
| GENE1318X | 16136_at   | 16136_at   | 1     | -0.49 | -0.87 | -1.24 | -0.5  | -1.95 | -2.38 | - |
|           | 1.27       | -2.42      | -2.66 |       |       |       |       |       |       |   |
| GENE1729X | 17532_at   | 17532_at   | 1     | -0.44 | -0.72 | -0.92 | -0.34 | -1.53 | -2.14 | - |
|           | 0.94       | -1.72      | -1.94 |       |       |       |       |       |       |   |
| GENE1877X | 18052_s_at | 18052_s_at | 1     | -0.57 | -0.93 | -1.41 | -0.58 | -1.99 | -2.89 | - |
|           | 1.44       | -2.29      | -2.94 |       |       |       |       |       |       |   |
| GENE1728X | 17526_s_at | 17526_s_at | 1     | -0.53 | -1.19 | -1.13 | -0.74 | -1.94 | -2.71 | - |
|           | 1.28       | -2.35      | -2.7  |       |       |       |       |       |       |   |
| GENE2383X | 19887_s_at | 19887_s_at | 1     | -0.27 | -0.87 | -1.12 | -0.53 | -1.99 | -2.35 | - |
|           | 1.07       | -2         | -2.21 |       |       |       |       |       |       |   |
| GENE235X  | 12745_at   | 12745_at   | 1     | -0.3  | -1.25 | -1.56 | -0.72 | -2.99 | -3.52 | - |
|           | 1.66       | -3.03      | -3.52 |       |       |       |       |       |       |   |
| GENE2163X | 18972_at   | 18972_at   | 1     | -0.39 | -1.1  | -1.37 | -0.6  | -2.22 | -2.8  | - |
|           | 1.11       | -2.16      | -2.72 |       |       |       |       |       |       |   |
| GENE1146X | 15644_at   | 15644_at   | 1     | -0.48 | -1.15 | -1.28 | -0.38 | -2.85 | -2.93 | - |
|           | 1.16       | -2.45      | -3.14 |       |       |       |       |       |       |   |
| GENE2050X | 18628_at   | 18628_at   | 1     | -0.43 | -1.05 | -1.51 | -0.63 | -3.11 | -3.38 | - |
|           | 1.35       | -2.49      | -3.49 |       |       |       |       |       |       |   |
| GENE493X  | 13547_at   | 13547_at   | 1     | -1.27 | -2.68 | -2.4  | -1.1  | -4.53 | -4.75 | - |
|           | 2.07       | -5.38      | -6.23 |       |       |       |       |       |       |   |
| GENE1894X | 18086_s_at | 18086_s_at | 1     | -0.32 | -0.76 | -0.94 | -0.46 | -1.54 | -2.07 | - |
|           | 0.72       | -1.8       | -2.13 |       |       |       |       |       |       |   |
| GENE554X  | 13654_at   | 13654_at   | 1     | -0.53 | -1.05 | -1.17 | -0.33 | -2    | -2.55 | - |
|           | 0.92       | -2.3       | -2.72 |       |       |       |       |       |       |   |
| GENE1889X | 18081_at   | 18081_at   | 1     | -0.31 | -0.9  | -0.87 | -0.44 | -1.72 | -2.11 | - |
|           | 0.59       | -1.87      | -2.24 |       |       |       |       |       |       |   |

|           |            |            |       |       |       |       |       |       |       |    |
|-----------|------------|------------|-------|-------|-------|-------|-------|-------|-------|----|
| GENE1878X | 18053_s_at | 18053_s_at | 1     | -0.39 | -0.65 | -0.93 | -0.4  | -1.82 | -2.27 | -  |
|           | 0.86       | -1.93      | -2.17 |       |       |       |       |       |       |    |
| GENE1008X | 15209_s_at | 15209_s_at | 1     | -0.59 | -1.22 | -1.41 | -0.55 | -2.59 | -3.1  | -  |
|           | 1.16       | -2.66      | -2.9  |       |       |       |       |       |       |    |
| GENE1092X | 15521_at   | 15521_at   | 1     | -0.57 | -1.03 | -1.38 | -0.82 | -2.32 | -2.78 | -  |
|           | 1.02       | -2.63      | -2.78 |       |       |       |       |       |       |    |
| GENE994X  | 15182_at   | 15182_at   | 1     | -0.63 | -1.04 | -1.33 | -0.67 | -2.33 | -2.73 | -  |
|           | 1.21       | -2.83      | -2.85 |       |       |       |       |       |       |    |
| GENE2029X | 18588_at   | 18588_at   | 1     | -0.45 | -0.86 | -1.1  | -0.54 | -2.08 | -2.59 | -  |
|           | 0.97       | -2.48      | -2.38 |       |       |       |       |       |       |    |
| GENE1462X | 16548_at   | 16548_at   | 1     | -0.59 | -1.17 | -1.34 | -0.52 | -2.35 | -2.86 | -  |
|           | 1.04       | -2.9       | -2.54 |       |       |       |       |       |       |    |
| GENE270X  | 12813_at   | 12813_at   | 1     | -0.29 | -0.65 | -0.57 | -0.5  | -1.09 | -1.23 | -  |
|           | 0.44       | -1.12      | -0.91 |       |       |       |       |       |       |    |
| GENE1411X | 16452_g_at | 16452_g_at | 1     | -0.39 | -0.67 | -0.71 | -0.43 | -1.21 | -1.33 | -  |
|           | 0.53       | -1.26      | -0.98 |       |       |       |       |       |       |    |
| GENE1423X | 16479_s_at | 16479_s_at | 1     | -0.62 | -1.18 | -1.24 | -0.92 | -2.45 | -2.7  | -  |
|           | 0.92       | -2.71      | -2.21 |       |       |       |       |       |       |    |
| GENE1741X | 17565_s_at | 17565_s_at | 1     | -0.79 | -1.5  | -1.1  | -1.21 | -2.51 | -3.04 | -  |
|           | 1.29       | -2.53      | -2.1  |       |       |       |       |       |       |    |
| GENE1683X | 17411_s_at | 17411_s_at | 1     | -0.5  | -0.52 | -0.6  | -0.49 | -1.11 | -1.38 | -  |
|           | 0.52       | -1.15      | -1.09 |       |       |       |       |       |       |    |
| GENE1216X | 15906_at   | 15906_at   | 1     | -0.47 | -1.34 | -1.39 | -0.87 | -2.1  | -2.25 | -1 |
|           | -1.95      | -1.95      |       |       |       |       |       |       |       |    |
| GENE1991X | 18416_at   | 18416_at   | 1     | -0.69 | -1.76 | -1.79 | -1.26 | -2.42 | -2.6  | -  |
|           | 1.24       | -2.58      | -2.24 |       |       |       |       |       |       |    |
| GENE904X  | 15006_at   | 15006_at   | 1     | -0.72 | -1.33 | -1.5  | -0.7  | -2.08 | -2.22 | -  |
|           | 0.84       | -2.17      | -1.79 |       |       |       |       |       |       |    |
| GENE1196X | 15837_at   | 15837_at   | 1     | -1.46 | -2.5  | -2.72 | -1.38 | -3.57 | -3.74 | -  |
|           | 1.64       | -3.55      | -3.52 |       |       |       |       |       |       |    |
| GENE95X   | 12236_at   | 12236_at   | 1     | -1.08 | -1.56 | -1.83 | -1.34 | -2.96 | -2.74 | -  |
|           | 0.93       | -2.63      | -2.63 |       |       |       |       |       |       |    |
| GENE32X   | 12078_at   | 12078_at   | 1     | -0.49 | -1.11 | -1.38 | -0.76 | -2.42 | -2.69 | -  |
|           | 0.87       | -2.07      | -2.31 |       |       |       |       |       |       |    |
| GENE1559X | 16954_at   | 16954_at   | 1     | -0.6  | -1.29 | -1.54 | -1.01 | -2.6  | -3.07 | -  |
|           | 0.92       | -2.33      | -2.79 |       |       |       |       |       |       |    |
| GENE843X  | 14737_s_at | 14737_s_at | 1     | -0.59 | -1.12 | -1.27 | -0.51 | -2.12 | -2.43 | -  |
|           | 0.71       | -1.88      | -2.12 |       |       |       |       |       |       |    |
| GENE1972X | 18313_at   | 18313_at   | 1     | -0.94 | -1.59 | -1.82 | -0.93 | -3.06 | -3.6  | -  |
|           | 1.16       | -2.94      | -3.24 |       |       |       |       |       |       |    |
| GENE895X  | 14986_at   | 14986_at   | 1     | -0.64 | -1.19 | -1.3  | -0.63 | -2.3  | -2.62 | -  |
|           | 1.11       | -2.04      | -2.48 |       |       |       |       |       |       |    |
| GENE1264X | 16034_at   | 16034_at   | 1     | -0.65 | -1.41 | -1.56 | -0.83 | -2.75 | -3.17 | -  |
|           | 1.47       | -2.54      | -2.76 |       |       |       |       |       |       |    |
| GENE564X  | 13678_at   | 13678_at   | 1     | -1.09 | -1.86 | -2.09 | -1.34 | -3.72 | -4.53 | -  |
|           | 2.13       | -3.3       | -4.08 |       |       |       |       |       |       |    |
| GENE1895X | 18087_s_at | 18087_s_at | 1     | -0.75 | -1.15 | -1.3  | -0.72 | -2.29 | -2.65 | -  |
|           | 1.13       | -2.34      | -2.64 |       |       |       |       |       |       |    |
| GENE1874X | 18047_at   | 18047_at   | 1     | -0.26 | -0.66 | -0.61 | -0.34 | -1.13 | -1.3  | -  |
|           | 0.56       | -0.99      | -1.03 |       |       |       |       |       |       |    |
| GENE550X  | 13649_at   | 13649_at   | 1     | -0.38 | -0.86 | -0.95 | -0.59 | -1.54 | -1.95 | -  |
|           | 0.73       | -1.56      | -1.61 |       |       |       |       |       |       |    |
| GENE789X  | 14600_at   | 14600_at   | 1     | -1.19 | -2.52 | -2.61 | -1.38 | -4.21 | -5.44 | -  |
|           | 1.96       | -4.02      | -4.48 |       |       |       |       |       |       |    |
| GENE1969X | 18306_at   | 18306_at   | 1     | -0.81 | -1.47 | -1.63 | -0.76 | -2.63 | -3.29 | -  |
|           | 1.29       | -2.78      | -2.72 |       |       |       |       |       |       |    |

|           |            |            |       |       |       |       |       |       |       |    |
|-----------|------------|------------|-------|-------|-------|-------|-------|-------|-------|----|
| GENE874X  | 14914_at   | 14914_at   | 1     | -0.39 | -0.94 | -1    | -0.42 | -1.45 | -1.71 | -  |
|           | 0.88       | -1.34      | -1.63 |       |       |       |       |       |       |    |
| GENE252X  | 12784_at   | 12784_at   | 1     | -0.76 | -1.48 | -1.67 | -0.92 | -2.26 | -2.77 | -  |
|           | 1.53       | -2.23      | -2.51 |       |       |       |       |       |       |    |
| GENE476X  | 13482_at   | 13482_at   | 1     | -0.96 | -1.76 | -2.28 | -0.96 | -3.03 | -4.03 | -  |
|           | 2.1        | -2.96      | -3.42 |       |       |       |       |       |       |    |
| GENE1036X | 15372_at   | 15372_at   | 1     | -0.51 | -1.25 | -1.7  | -0.61 | -2.43 | -2.57 | -  |
|           | 1.26       | -2.05      | -2.36 |       |       |       |       |       |       |    |
| GENE1037X | 15373_g_at | 15373_g_at | 1     | -0.67 | -1.24 | -1.57 | -0.53 | -2.22 | -2.56 | -  |
|           | 1.03       | -1.82      | -2.47 |       |       |       |       |       |       |    |
| GENE2091X | 18722_s_at | 18722_s_at | 1     | -0.45 | -0.77 | -0.92 | -0.44 | -1.18 | -1.37 | -  |
|           | 0.7        | -1.31      | -1.29 |       |       |       |       |       |       |    |
| GENE881X  | 14930_at   | 14930_at   | 1     | -1.14 | -1.91 | -2.08 | -0.86 | -2.86 | -3.1  | -  |
|           | 1.55       | -2.82      | -3.19 |       |       |       |       |       |       |    |
| GENE290X  | 12910_s_at | 12910_s_at | 1     | -1.13 | -1.99 | -2.04 | -0.93 | -2.8  | -3.23 | -  |
|           | 1.7        | -2.7       | -2.84 |       |       |       |       |       |       |    |
| GENE2076X | 18685_at   | 18685_at   | 1     | -0.24 | -0.54 | -0.81 | -0.22 | -1.25 | -1.4  | -  |
|           | 0.35       | -1.23      | -1.42 |       |       |       |       |       |       |    |
| GENE237X  | 12752_s_at | 12752_s_at | 1     | -0.31 | -0.72 | -0.86 | -0.11 | -1.54 | -1.72 | -  |
|           | 0.45       | -1.27      | -1.44 |       |       |       |       |       |       |    |
| GENE1121X | 15595_s_at | 15595_s_at | 1     | -0.45 | -0.82 | -0.87 | -0.12 | -1.41 | -1.82 | -  |
|           | 0.45       | -1.53      | -1.43 |       |       |       |       |       |       |    |
| GENE98X   | 12242_at   | 12242_at   | 1     | -0.64 | -1.26 | -1.46 | -0.44 | -2.09 | -2.54 | -  |
|           | 0.7        | -2.24      | -2.37 |       |       |       |       |       |       |    |
| GENE630X  | 14014_at   | 14014_at   | 1     | -0.82 | -1.37 | -1.8  | -0.33 | -2.44 | -2.85 | -  |
|           | 0.66       | -2.51      | -2.66 |       |       |       |       |       |       |    |
| GENE316X  | 13007_at   | 13007_at   | 1     | -0.24 | -0.61 | -0.8  | -0.23 | -0.85 | -1.22 | -  |
|           | 0.16       | -0.93      | -0.99 |       |       |       |       |       |       |    |
| GENE1595X | 17048_s_at | 17048_s_at | 1     | -0.46 | -0.75 | -0.86 | -0.25 | -1.15 | -1.33 | -  |
|           | 0.14       | -1.08      | -1.23 |       |       |       |       |       |       |    |
| GENE1300X | 16102_s_at | 16102_s_at | 1     | -0.23 | -0.54 | -0.58 | -0.27 | -0.88 | -1.09 | -  |
|           | 0.16       | -0.84      | -0.91 |       |       |       |       |       |       |    |
| GENE718X  | 14432_at   | 14432_at   | 1     | -0.55 | -1.73 | -2.32 | -0.76 | -3.73 | -4    | -1 |
|           | -3.32      | -3.32      |       |       |       |       |       |       |       |    |
| GENE227X  | 12727_f_at | 12727_f_at | 1     | -0.64 | -2.37 | -2.67 | -0.61 | -4.15 | -4.15 | -  |
|           | 0.7        | -3.43      | -3.7  |       |       |       |       |       |       |    |
| GENE19X   | 12033_at   | 12033_at   | 1     | -0.15 | -1.44 | -1.73 | -0.72 | -2.34 | -2.66 | -  |
|           | 0.93       | -2.06      | -2.36 |       |       |       |       |       |       |    |
| GENE55X   | 12137_at   | 12137_at   | 1     | -0.24 | -0.92 | -1.19 | -0.58 | -2    | -1.91 | -  |
|           | 0.52       | -1.74      | -1.46 |       |       |       |       |       |       |    |
| GENE767X  | 14540_at   | 14540_at   | 1     | -0.53 | -1.33 | -1.58 | -1.02 | -2.8  | -2.8  | -  |
|           | 0.86       | -2.49      | -2.42 |       |       |       |       |       |       |    |
| GENE715X  | 14429_at   | 14429_at   | 1     | -0.69 | -1.51 | -2.1  | -0.76 | -2.39 | -2.97 | -  |
|           | 0.77       | -3.32      | -2.44 |       |       |       |       |       |       |    |
| GENE2268X | 19422_at   | 19422_at   | 1     | -0.27 | -0.79 | -0.77 | -0.58 | -1.36 | -1.58 | -  |
|           | 0.44       | -1.82      | -1.61 |       |       |       |       |       |       |    |
| GENE2528X | 20273_at   | 20273_at   | 1     | -0.73 | -1.4  | -1.45 | -0.93 | -2.26 | -2.57 | -  |
|           | 1.27       | -2.68      | -2.48 |       |       |       |       |       |       |    |
| GENE1758X | 17596_at   | 17596_at   | 1     | -1.04 | -1.21 | -1.45 | -0.66 | -2.32 | -2.55 | -  |
|           | 1.01       | -2.62      | -2.54 |       |       |       |       |       |       |    |
| GENE48X   | 12122_at   | 12122_at   | 1     | -0.73 | -1.48 | -2.26 | -0.83 | -2.51 | -2.85 | -  |
|           | 1.06       | -2.94      | -3.31 |       |       |       |       |       |       |    |
| GENE1055X | 15422_at   | 15422_at   | 1     | -1.13 | -1.87 | -2.05 | -0.82 | -2.83 | -2.66 | -  |
|           | 1.14       | -3.27      | -3.32 |       |       |       |       |       |       |    |
| GENE2303X | 19558_at   | 19558_at   | 1     | -0.94 | -2.02 | -2.48 | -0.96 | -2.88 | -2.88 | -  |
|           | 1.52       | -3.52      | -3.52 |       |       |       |       |       |       |    |

|           |            |            |       |       |       |       |       |       |       |   |
|-----------|------------|------------|-------|-------|-------|-------|-------|-------|-------|---|
| GENE1568X | 16977_at   | 16977_at   | 1     | 0.09  | -0.47 | -0.88 | -0.01 | -1.07 | -0.85 | - |
|           | 0.71       | -0.93      | -0.95 |       |       |       |       |       |       |   |
| GENE448X  | 13322_at   | 13322_at   | 1     | -0.63 | -1.44 | -3.76 | -1.35 | -3.78 | -3.78 | - |
|           | 2.76       | -2.76      | -2.76 |       |       |       |       |       |       |   |
| GENE1227X | 15929_at   | 15929_at   | 1     | -0.87 | -1.97 | -3.45 | -1.65 | -3.45 | -3.72 | - |
|           | 3.32       | -2.9       | -3.58 |       |       |       |       |       |       |   |
| GENE780X  | 14574_at   | 14574_at   | 1     | 0.12  | -0.83 | -0.87 | 0.96  | -1.79 | -1.32 |   |
|           | 1.19       | -2         | -1.83 |       |       |       |       |       |       |   |
| GENE1632X | 17187_at   | 17187_at   | 1     | -0.66 | -1.33 | -1.22 | 0.84  | -2.39 | -1.65 |   |
|           | 1.14       | -1.81      | -2.44 |       |       |       |       |       |       |   |
| GENE703X  | 14393_at   | 14393_at   | 1     | -0.46 | -1.62 | -1.15 | 1.29  | -3.1  | -2.97 |   |
|           | 1.02       | -2.44      | -4.12 |       |       |       |       |       |       |   |
| GENE1590X | 17033_at   | 17033_at   | 1     | -0.82 | -0.93 | -1.05 | 0.5   | -0.99 | -0.92 |   |
|           | 0.18       | -0.86      | -0.88 |       |       |       |       |       |       |   |
| GENE793X  | 14610_at   | 14610_at   | 1     | -0.87 | -1.24 | -1.54 | 0.71  | -1.3  | -1.34 |   |
|           | 0.84       | -0.92      | -1.18 |       |       |       |       |       |       |   |
| GENE1761X | 17601_at   | 17601_at   | 1     | -0.74 | -0.71 | -1.25 | 0.66  | -1.73 | -1.03 |   |
|           | 0.47       | -0.51      | -1.23 |       |       |       |       |       |       |   |
| GENE1009X | 15210_s_at | 15210_s_at | 1     | -0.5  | -0.66 | -0.8  | 0.22  | -0.94 | -1.12 |   |
|           | 0.31       | -0.5       | -0.77 |       |       |       |       |       |       |   |
| GENE1492X | 16629_at   | 16629_at   | 1     | -1.37 | -1.85 | -2.04 | 0.44  | -2.58 | -2.3  |   |
|           | 1.15       | -0.8       | -1.74 |       |       |       |       |       |       |   |
| GENE302X  | 12953_at   | 12953_at   | 1     | -1.22 | -2.33 | -3.27 | 0.66  | -4.49 | -3.9  |   |
|           | 0.98       | -2.07      | -2.24 |       |       |       |       |       |       |   |
| GENE1865X | 18024_s_at | 18024_s_at | 1     | -1.17 | -1.27 | -0.8  | 0.39  | -1.95 | -1.63 | - |
|           | 0.15       | -1.08      | -1.96 |       |       |       |       |       |       |   |
| GENE1470X | 16569_s_at | 16569_s_at | 1     | -0.89 | -0.97 | -0.89 | 0.15  | -1.63 | -0.77 |   |
|           | 0.35       | -1.24      | -1.4  |       |       |       |       |       |       |   |
| GENE856X  | 14832_at   | 14832_at   | 1     | -1.89 | -2.38 | -2.58 | -0.11 | -2.42 | -1.33 |   |
|           | 0.12       | -3.12      | -2.53 |       |       |       |       |       |       |   |
| GENE1384X | 16367_i_at | 16367_i_at | 1     | -3.32 | -0.02 | -1    | -0.43 | -1.84 | -1    | - |
|           | 0.4        | -1.15      | -3.29 |       |       |       |       |       |       |   |
| GENE1648X | 17292_at   | 17292_at   | 1     | -0.73 | -0.83 | -0.75 | 0.05  | -0.17 | -0.85 |   |
|           | 0.13       | -0.86      | -1.44 |       |       |       |       |       |       |   |
| GENE2603X | 20490_at   | 20490_at   | 1     | -0.88 | -0.67 | -1.23 | 0.02  | -0.58 | -0.65 | - |
|           | 0.42       | -1.04      | -1.5  |       |       |       |       |       |       |   |
| GENE1286X | 16066_at   | 16066_at   | 1     | -1.34 | -1.29 | -1.4  | 0.71  | -1    | -1    | - |
|           | 0.52       | -2         | -2.8  |       |       |       |       |       |       |   |
| GENE575X  | 13709_at   | 13709_at   | 1     | -0.63 | -0.79 | -0.84 | -0.33 | -0.22 | -0.55 | - |
|           | 0.4        | -0.51      | -1.35 |       |       |       |       |       |       |   |
| GENE695X  | 14335_at   | 14335_at   | 1     | -0.7  | -1.36 | -1.59 | -0.05 | -0.43 | -1.18 | - |
|           | 0.63       | -1.3       | -3.07 |       |       |       |       |       |       |   |
| GENE2466X | 20100_at   | 20100_at   | 1     | -0.22 | -0.48 | -0.67 | -0.11 | -0.49 | -0.41 | - |
|           | 0.29       | -0.46      | -1.06 |       |       |       |       |       |       |   |
| GENE1490X | 16622_s_at | 16622_s_at | 1     | -0.32 | -1    | -1.11 | -0.27 | -0.6  | -0.8  | - |
|           | 0.85       | -1.07      | -1.8  |       |       |       |       |       |       |   |
| GENE815X  | 14665_r_at | 14665_r_at | 1     | -0.45 | -0.86 | -0.82 | -0.03 | -1.31 | -2.13 | - |
|           | 0.51       | -1.19      | -2.62 |       |       |       |       |       |       |   |
| GENE814X  | 14664_i_at | 14664_i_at | 1     | -0.36 | -0.76 | -0.7  | 0.09  | -1.04 | -1.56 | - |
|           | 0.4        | -1.13      | -2.83 |       |       |       |       |       |       |   |
| GENE1067X | 15465_at   | 15465_at   | 1     | -0.26 | -0.42 | -0.39 | 0.15  | -0.72 | -0.72 | - |
|           | 0.49       | -0.78      | -1.53 |       |       |       |       |       |       |   |
| GENE1145X | 15642_at   | 15642_at   | 1     | -0.45 | -0.57 | -0.74 | -0.33 | -1.23 | -1.33 | - |
|           | 0.79       | -1.93      | -2.44 |       |       |       |       |       |       |   |
| GENE1954X | 18281_at   | 18281_at   | 1     | -0.41 | -0.75 | -0.95 | -0.33 | -1.83 | -2.17 | - |
|           | 1.12       | -2.44      | -3.52 |       |       |       |       |       |       |   |



|           |            |            |       |       |       |       |       |       |       |   |
|-----------|------------|------------|-------|-------|-------|-------|-------|-------|-------|---|
| GENE451X  | 13335_at   | 13335_at   | 1     | -0.48 | -0.96 | -1.06 | 0.19  | -0.9  | -1.07 | - |
|           | 0.07       | -1.45      | -1.45 |       |       |       |       |       |       |   |
| GENE339X  | 13084_at   | 13084_at   | 1     | -0.22 | -0.8  | -0.83 | 0.39  | -0.83 | -0.38 | - |
|           | 0.36       | -1.07      | -1.15 |       |       |       |       |       |       |   |
| GENE181X  | 12526_at   | 12526_at   | 1     | -0.26 | -0.92 | -1.26 | 0.2   | -1.19 | -1    | - |
|           | 0.63       | -2.22      | -1.39 |       |       |       |       |       |       |   |
| GENE71X   | 12178_s_at | 12178_s_at | 1     | -0.09 | -0.51 | -0.91 | 0.2   | -0.78 | -0.77 | - |
|           | 0.42       | -1.4       | -1.33 |       |       |       |       |       |       |   |
| GENE2330X | 19663_at   | 19663_at   | 1     | -0.22 | -0.82 | -1.03 | 0.28  | -0.71 | -0.76 | - |
|           | 0.75       | -1.5       | -1.36 |       |       |       |       |       |       |   |
| GENE191X  | 12559_at   | 12559_at   | 1     | -0.28 | -0.88 | -1.23 | 0.19  | -0.85 | -0.8  | - |
|           | 0.8        | -1.7       | -1.6  |       |       |       |       |       |       |   |
| GENE866X  | 14890_at   | 14890_at   | 1     | -0.28 | -1.79 | -1.24 | 0.18  | -1.44 | -1.32 | - |
|           | 0.66       | -2.58      | -2.43 |       |       |       |       |       |       |   |
| GENE1544X | 16905_s_at | 16905_s_at | 1     | -0.25 | -0.7  | -0.72 | 0.19  | -0.79 | -0.7  | - |
|           | 0.76       | -1.81      | -1.5  |       |       |       |       |       |       |   |
| GENE542X  | 13634_s_at | 13634_s_at | 1     | -0.7  | -1.05 | -1.1  | 0.08  | -0.66 | -0.7  | - |
|           | 0.7        | -2.12      | -1.67 |       |       |       |       |       |       |   |
| GENE1512X | 16696_at   | 16696_at   | 1     | -1.11 | -1.7  | -1.45 | -0.15 | -1.22 | -1.61 | - |
|           | 1.13       | -3.45      | -2.58 |       |       |       |       |       |       |   |
| GENE933X  | 15081_at   | 15081_at   | 1     | -0.39 | -0.84 | -0.98 | 0     | -0.52 | -0.94 | - |
|           | 0.59       | -1.22      | -1.25 |       |       |       |       |       |       |   |
| GENE2214X | 19192_at   | 19192_at   | 1     | -0.64 | -1    | -1.21 | 0.02  | -0.88 | -1.28 | - |
|           | 0.64       | -1.56      | -1.62 |       |       |       |       |       |       |   |
| GENE1025X | 15319_at   | 15319_at   | 1     | -0.3  | -0.74 | -1.3  | -0.03 | -0.6  | -1.34 | - |
|           | 0.8        | -1.72      | -1.55 |       |       |       |       |       |       |   |
| GENE351X  | 13111_at   | 13111_at   | 1     | -0.5  | -0.53 | -0.81 | 0.2   | -0.39 | -0.74 | - |
|           | 0.83       | -1.5       | -1.58 |       |       |       |       |       |       |   |
| GENE410X  | 13232_s_at | 13232_s_at | 1     | -0.34 | -0.69 | -0.57 | 0.03  | -0.45 | -0.78 | - |
|           | 0.59       | -1.29      | -1.25 |       |       |       |       |       |       |   |
| GENE1082X | 15490_at   | 15490_at   | 1     | -0.77 | -1.33 | -1.27 | 0.18  | -0.68 | -1.32 | - |
|           | 1.19       | -2.12      | -2.12 |       |       |       |       |       |       |   |
| GENE837X  | 14727_s_at | 14727_s_at | 1     | -0.37 | -0.81 | -0.77 | -0.04 | -0.43 | -0.98 | - |
|           | 0.81       | -1.11      | -1.66 |       |       |       |       |       |       |   |
| GENE1482X | 16607_s_at | 16607_s_at | 1     | -0.65 | -1.02 | -1.12 | 0.03  | -0.52 | -1.26 | - |
|           | 0.95       | -1.55      | -1.97 |       |       |       |       |       |       |   |
| GENE440X  | 13292_at   | 13292_at   | 1     | -0.34 | -1.04 | -1.24 | -0.21 | -0.84 | -1.44 | - |
|           | 0.86       | -1.86      | -2.46 |       |       |       |       |       |       |   |
| GENE1497X | 16642_s_at | 16642_s_at | 1     | -0.67 | -0.89 | -1.3  | 0.05  | -1.04 | -1.39 | - |
|           | 1.02       | -1.64      | -1.89 |       |       |       |       |       |       |   |
| GENE855X  | 14820_g_at | 14820_g_at | 1     | -1.11 | -1.34 | -1.92 | -0.16 | -1.9  | -2.03 | - |
|           | 2.07       | -2.65      | -3.65 |       |       |       |       |       |       |   |
