# Supplementary material
Source: PubMed Central journal article supplement (PMC141204)
Supplement: plntcell_15_2_317__7.pdf [file plntcell_15_2_317__7.pdf]

|         |           |           |                  |
|---------|-----------|-----------|------------------|
| NODE1X  | GENE288X  | GENE287X  | 0.999755859375   |
| NODE2X  | GENE2383X | GENE235X  | 0.999267578125   |
| NODE3X  | GENE586X  | GENE768X  | 0.99920654296875 |
| NODE4X  | GENE1830X | GENE2483X | 0.99920654296875 |
| NODE5X  | GENE2414X | GENE3X    | 0.9991455078125  |
| NODE6X  | GENE550X  | GENE789X  | 0.9991455078125  |
| NODE7X  | GENE843X  | GENE1972X | 0.9991455078125  |
| NODE8X  | GENE1434X | GENE1241X | 0.9991455078125  |
| NODE9X  | GENE2448X | GENE1677X | 0.9991455078125  |
| NODE10X | GENE2415X | GENE253X  | 0.99908447265625 |
| NODE11X | GENE1409X | GENE945X  | 0.9990234375     |
| NODE12X | GENE32X   | GENE1559X | 0.9989013671875  |
| NODE13X | GENE895X  | GENE1264X | 0.99884033203125 |
| NODE14X | GENE53X   | GENE2362X | 0.998779296875   |
| NODE15X | GENE782X  | GENE127X  | 0.998779296875   |
| NODE16X | NODE9X    | GENE1701X | 0.998779296875   |
| NODE17X | GENE513X  | GENE24X   | 0.99871826171875 |
| NODE18X | GENE98X   | GENE630X  | 0.99871826171875 |
| NODE19X | GENE916X  | GENE381X  | 0.9986572265625  |
| NODE20X | GENE954X  | GENE2179X | 0.9986572265625  |
| NODE21X | GENE2568X | GENE2052X | 0.9986572265625  |
| NODE22X | GENE1092X | GENE994X  | 0.99859619140625 |
| NODE23X | GENE2025X | GENE1035X | 0.99859619140625 |
| NODE24X | GENE1610X | GENE1993X | 0.99859619140625 |
| NODE25X | NODE10X   | GENE1688X | 0.99859619140625 |
| NODE26X | GENE1107X | GENE1257X | 0.99853515625    |
| NODE27X | NODE6X    | GENE1969X | 0.99853515625    |
| NODE28X | GENE822X  | GENE1151X | 0.99847412109375 |
| NODE29X | GENE2029X | GENE1462X | 0.99847412109375 |
| NODE30X | GENE1896X | GENE1884X | 0.99847412109375 |
| NODE31X | GENE1950X | GENE2075X | 0.99847412109375 |
| NODE32X | NODE13X   | GENE564X  | 0.99847412109375 |
| NODE33X | GENE1605X | GENE64X   | 0.9984130859375  |
| NODE34X | GENE777X  | GENE1817X | 0.9984130859375  |
| NODE35X | GENE1305X | GENE1158X | 0.9984130859375  |
| NODE36X | GENE2598X | GENE2457X | 0.9984130859375  |
| NODE37X | GENE520X  | GENE1996X | 0.99835205078125 |
| NODE38X | GENE393X  | GENE1424X | 0.998291015625   |
| NODE39X | GENE467X  | GENE2607X | 0.998291015625   |
| NODE40X | GENE2091X | GENE881X  | 0.998291015625   |
| NODE41X | GENE2334X | GENE2333X | 0.998291015625   |
| NODE42X | GENE2330X | GENE191X  | 0.99822998046875 |
| NODE43X | GENE874X  | GENE252X  | 0.99822998046875 |
| NODE44X | GENE1894X | GENE554X  | 0.99822998046875 |
| NODE45X | GENE2096X | GENE2416X | 0.99822998046875 |
| NODE46X | GENE685X  | GENE684X  | 0.9981689453125  |
| NODE47X | GENE1147X | GENE788X  | 0.9981689453125  |
| NODE48X | GENE1878X | GENE1008X | 0.9981689453125  |
| NODE49X | GENE1881X | GENE1414X | 0.9981689453125  |
| NODE50X | GENE93X   | GENE1959X | 0.99810791015625 |
| NODE51X | GENE1011X | GENE2652X | 0.99810791015625 |
| NODE52X | NODE30X   | GENE2072X | 0.998046875      |
| NODE53X | GENE321X  | NODE15X   | 0.99798583984375 |
| NODE54X | GENE602X  | GENE2366X | 0.99798583984375 |
| NODE55X | GENE616X  | GENE2298X | 0.99798583984375 |
| NODE56X | GENE1146X | GENE2050X | 0.99798583984375 |
| NODE57X | GENE2013X | GENE607X  | 0.9979248046875  |

|          |           |           |                  |
|----------|-----------|-----------|------------------|
| NODE58X  | GENE21X   | GENE1441X | 0.99786376953125 |
| NODE59X  | NODE40X   | GENE290X  | 0.99786376953125 |
| NODE60X  | GENE330X  | GENE1747X | 0.99786376953125 |
| NODE61X  | GENE2066X | GENE771X  | 0.99786376953125 |
| NODE62X  | GENE969X  | GENE1203X | 0.99786376953125 |
| NODE63X  | GENE1407X | NODE26X   | 0.99786376953125 |
| NODE64X  | NODE43X   | GENE476X  | 0.99786376953125 |
| NODE65X  | GENE138X  | GENE2524X | 0.997802734375   |
| NODE66X  | GENE270X  | GENE1411X | 0.997802734375   |
| NODE67X  | GENE2434X | GENE1337X | 0.997802734375   |
| NODE68X  | GENE1919X | GENE1585X | 0.997802734375   |
| NODE69X  | GENE2157X | GENE2535X | 0.997802734375   |
| NODE70X  | NODE39X   | GENE1746X | 0.997802734375   |
| NODE71X  | GENE249X  | GENE1578X | 0.9976806640625  |
| NODE72X  | GENE360X  | GENE1776X | 0.9976806640625  |
| NODE73X  | GENE1729X | GENE1877X | 0.9976806640625  |
| NODE74X  | GENE1058X | GENE1071X | 0.99761962890625 |
| NODE75X  | GENE1824X | GENE1816X | 0.99761962890625 |
| NODE76X  | NODE44X   | GENE1889X | 0.99761962890625 |
| NODE77X  | GENE1935X | GENE776X  | 0.99755859375    |
| NODE78X  | GENE904X  | GENE1196X | 0.99755859375    |
| NODE79X  | GENE1055X | GENE2303X | 0.99755859375    |
| NODE80X  | GENE1925X | GENE1165X | 0.99755859375    |
| NODE81X  | GENE1238X | GENE1939X | 0.99755859375    |
| NODE82X  | GENE1707X | GENE1690X | 0.99755859375    |
| NODE83X  | NODE2X    | GENE2163X | 0.99755859375    |
| NODE84X  | GENE103X  | GENE2597X | 0.99749755859375 |
| NODE85X  | GENE634X  | GENE1390X | 0.99749755859375 |
| NODE86X  | GENE1485X | GENE835X  | 0.99749755859375 |
| NODE87X  | GENE2350X | GENE1486X | 0.99749755859375 |
| NODE88X  | GENE2014X | GENE2567X | 0.99749755859375 |
| NODE89X  | GENE2313X | GENE2171X | 0.99749755859375 |
| NODE90X  | GENE1X    | GENE1478X | 0.9974365234375  |
| NODE91X  | GENE218X  | GENE2375X | 0.9974365234375  |
| NODE92X  | GENE710X  | GENE383X  | 0.9974365234375  |
| NODE93X  | GENE665X  | GENE534X  | 0.9974365234375  |
| NODE94X  | GENE922X  | GENE1835X | 0.9974365234375  |
| NODE95X  | GENE1216X | GENE1991X | 0.9974365234375  |
| NODE96X  | GENE1724X | GENE635X  | 0.99737548828125 |
| NODE97X  | GENE1499X | GENE1309X | 0.99737548828125 |
| NODE98X  | GENE1556X | GENE2498X | 0.99737548828125 |
| NODE99X  | GENE1260X | NODE11X   | 0.99737548828125 |
| NODE100X | GENE41X   | NODE68X   | 0.99737548828125 |
| NODE101X | GENE1897X | GENE1606X | 0.997314453125   |
| NODE102X | GENE1888X | GENE1890X | 0.997314453125   |
| NODE103X | NODE16X   | NODE5X    | 0.997314453125   |
| NODE104X | NODE12X   | NODE7X    | 0.997314453125   |
| NODE105X | GENE1855X | NODE14X   | 0.997314453125   |
| NODE106X | GENE1397X | GENE264X  | 0.99725341796875 |
| NODE107X | GENE1987X | GENE2481X | 0.99725341796875 |
| NODE108X | GENE1535X | GENE531X  | 0.9971923828125  |
| NODE109X | GENE1421X | GENE642X  | 0.9971923828125  |
| NODE110X | GENE2093X | GENE838X  | 0.9971923828125  |
| NODE111X | GENE1713X | GENE1576X | 0.9971923828125  |
| NODE112X | GENE1920X | GENE1921X | 0.9971923828125  |
| NODE113X | GENE55X   | GENE767X  | 0.99713134765625 |
| NODE114X | GENE389X  | GENE2109X | 0.99713134765625 |

|          |           |           |                  |
|----------|-----------|-----------|------------------|
| NODE115X | GENE1258X | NODE3X    | 0.99713134765625 |
| NODE116X | GENE2039X | GENE2210X | 0.99713134765625 |
| NODE117X | GENE594X  | GENE1193X | 0.9970703125     |
| NODE118X | GENE600X  | GENE760X  | 0.9970703125     |
| NODE119X | GENE1036X | GENE1037X | 0.9970703125     |
| NODE120X | GENE2263X | GENE1169X | 0.9970703125     |
| NODE121X | GENE1416X | GENE1173X | 0.9970703125     |
| NODE122X | GENE1398X | GENE2057X | 0.9970703125     |
| NODE123X | GENE1874X | NODE27X   | 0.9970703125     |
| NODE124X | NODE32X   | GENE1895X | 0.9970703125     |
| NODE125X | NODE58X   | GENE1923X | 0.9970703125     |
| NODE126X | GENE1246X | GENE1250X | 0.99700927734375 |
| NODE127X | NODE36X   | GENE2231X | 0.99700927734375 |
| NODE128X | GENE2252X | NODE77X   | 0.99700927734375 |
| NODE129X | GENE1945X | NODE57X   | 0.99700927734375 |
| NODE130X | GENE2314X | NODE89X   | 0.99700927734375 |
| NODE131X | GENE2115X | GENE1228X | 0.9969482421875  |
| NODE132X | GENE320X  | GENE2031X | 0.99688720703125 |
| NODE133X | GENE2428X | GENE1461X | 0.99688720703125 |
| NODE134X | GENE839X  | GENE86X   | 0.99676513671875 |
| NODE135X | NODE66X   | GENE1423X | 0.99676513671875 |
| NODE136X | NODE52X   | NODE51X   | 0.99676513671875 |
| NODE137X | NODE75X   | GENE540X  | 0.99676513671875 |
| NODE138X | GENE1951X | GENE31X   | 0.9967041015625  |
| NODE139X | GENE2285X | GENE1946X | 0.9967041015625  |
| NODE140X | NODE34X   | GENE2300X | 0.9967041015625  |
| NODE141X | GENE1843X | GENE753X  | 0.99664306640625 |
| NODE142X | GENE1128X | GENE81X   | 0.99658203125    |
| NODE143X | GENE344X  | GENE741X  | 0.99658203125    |
| NODE144X | GENE2094X | NODE45X   | 0.99658203125    |
| NODE145X | NODE21X   | GENE2430X | 0.99658203125    |
| NODE146X | GENE412X  | GENE1882X | 0.99652099609375 |
| NODE147X | GENE1064X | GENE1353X | 0.99652099609375 |
| NODE148X | GENE2020X | GENE2338X | 0.99652099609375 |
| NODE149X | NODE48X   | NODE22X   | 0.99652099609375 |
| NODE150X | GENE2319X | GENE1075X | 0.9964599609375  |
| NODE151X | GENE1120X | GENE2030X | 0.9964599609375  |
| NODE152X | GENE2552X | GENE1427X | 0.9964599609375  |
| NODE153X | GENE2318X | GENE1691X | 0.9964599609375  |
| NODE154X | GENE1571X | GENE396X  | 0.99639892578125 |
| NODE155X | GENE566X  | GENE1988X | 0.99639892578125 |
| NODE156X | GENE848X  | GENE1215X | 0.99639892578125 |
| NODE157X | GENE1108X | GENE1024X | 0.99639892578125 |
| NODE158X | GENE2281X | GENE2487X | 0.99639892578125 |
| NODE159X | NODE53X   | NODE103X  | 0.99639892578125 |
| NODE160X | NODE8X    | NODE63X   | 0.99639892578125 |
| NODE161X | GENE718X  | GENE227X  | 0.996337890625   |
| NODE162X | GENE1366X | GENE1303X | 0.996337890625   |
| NODE163X | NODE23X   | NODE60X   | 0.996337890625   |
| NODE164X | GENE621X  | GENE675X  | 0.99627685546875 |
| NODE165X | GENE1493X | GENE2043X | 0.99627685546875 |
| NODE166X | GENE1634X | GENE2176X | 0.99627685546875 |
| NODE167X | GENE2227X | GENE2546X | 0.99627685546875 |
| NODE168X | GENE2458X | GENE208X  | 0.9962158203125  |
| NODE169X | GENE1527X | GENE755X  | 0.9962158203125  |
| NODE170X | GENE859X  | GENE2643X | 0.9962158203125  |
| NODE171X | GENE1564X | GENE1743X | 0.9962158203125  |

|          |           |           |                  |
|----------|-----------|-----------|------------------|
| NODE172X | GENE2595X | GENE1702X | 0.9962158203125  |
| NODE173X | GENE2502X | GENE2000X | 0.9962158203125  |
| NODE174X | GENE1121X | NODE18X   | 0.9962158203125  |
| NODE175X | GENE664X  | GENE535X  | 0.99615478515625 |
| NODE176X | GENE556X  | GENE1811X | 0.99615478515625 |
| NODE177X | GENE929X  | GENE2060X | 0.99615478515625 |
| NODE178X | NODE73X   | GENE1728X | 0.99615478515625 |
| NODE179X | GENE1866X | NODE70X   | 0.99615478515625 |
| NODE180X | GENE2590X | GENE2092X | 0.99615478515625 |
| NODE181X | GENE1883X | NODE49X   | 0.99615478515625 |
| NODE182X | GENE2402X | GENE2401X | 0.99609375       |
| NODE183X | NODE122X  | GENE2230X | 0.99609375       |
| NODE184X | GENE236X  | GENE1262X | 0.99603271484375 |
| NODE185X | GENE561X  | GENE805X  | 0.99603271484375 |
| NODE186X | GENE637X  | GENE599X  | 0.99603271484375 |
| NODE187X | GENE1115X | GENE942X  | 0.99603271484375 |
| NODE188X | GENE1271X | GENE2110X | 0.99603271484375 |
| NODE189X | GENE2228X | GENE1718X | 0.99603271484375 |
| NODE190X | GENE313X  | NODE94X   | 0.99603271484375 |
| NODE191X | GENE1714X | GENE153X  | 0.9959716796875  |
| NODE192X | GENE661X  | GENE1254X | 0.9959716796875  |
| NODE193X | GENE813X  | GENE2422X | 0.9959716796875  |
| NODE194X | GENE2256X | GENE1673X | 0.9959716796875  |
| NODE195X | GENE1693X | GENE2586X | 0.9959716796875  |
| NODE196X | GENE1185X | GENE461X  | 0.99591064453125 |
| NODE197X | GENE1739X | GENE802X  | 0.99591064453125 |
| NODE198X | GENE1291X | GENE1749X | 0.99591064453125 |
| NODE199X | GENE656X  | GENE1422X | 0.995849609375   |
| NODE200X | GENE688X  | NODE17X   | 0.995849609375   |
| NODE201X | GENE1963X | NODE97X   | 0.995849609375   |
| NODE202X | GENE512X  | GENE2X    | 0.99578857421875 |
| NODE203X | GENE2079X | GENE579X  | 0.99578857421875 |
| NODE204X | GENE2521X | GENE796X  | 0.99578857421875 |
| NODE205X | GENE1599X | GENE16X   | 0.9957275390625  |
| NODE206X | GENE896X  | GENE129X  | 0.9957275390625  |
| NODE207X | GENE248X  | GENE477X  | 0.9957275390625  |
| NODE208X | GENE1202X | GENE544X  | 0.9957275390625  |
| NODE209X | GENE933X  | GENE2214X | 0.9957275390625  |
| NODE210X | GENE1671X | GENE1473X | 0.9957275390625  |
| NODE211X | GENE2548X | NODE20X   | 0.9957275390625  |
| NODE212X | GENE2277X | GENE1062X | 0.99566650390625 |
| NODE213X | GENE1595X | GENE1300X | 0.99566650390625 |
| NODE214X | NODE67X   | GENE1507X | 0.99566650390625 |
| NODE215X | GENE2528X | GENE1758X | 0.99566650390625 |
| NODE216X | GENE1873X | NODE31X   | 0.99566650390625 |
| NODE217X | GENE1318X | NODE178X  | 0.99566650390625 |
| NODE218X | GENE247X  | GENE242X  | 0.99560546875    |
| NODE219X | GENE2664X | GENE348X  | 0.99560546875    |
| NODE220X | GENE2219X | GENE693X  | 0.99560546875    |
| NODE221X | GENE829X  | GENE2139X | 0.99560546875    |
| NODE222X | GENE1141X | GENE975X  | 0.99560546875    |
| NODE223X | GENE1270X | GENE1438X | 0.99560546875    |
| NODE224X | GENE1440X | GENE183X  | 0.99554443359375 |
| NODE225X | GENE2532X | GENE337X  | 0.99554443359375 |
| NODE226X | GENE837X  | GENE1482X | 0.99554443359375 |
| NODE227X | GENE947X  | GENE941X  | 0.99554443359375 |
| NODE228X | GENE1145X | GENE1954X | 0.99554443359375 |

|          |           |           |                  |
|----------|-----------|-----------|------------------|
| NODE229X | NODE95X   | NODE78X   | 0.99554443359375 |
| NODE230X | NODE106X  | GENE233X  | 0.9954833984375  |
| NODE231X | GENE457X  | GENE1618X | 0.9954833984375  |
| NODE232X | GENE624X  | GENE1973X | 0.9954833984375  |
| NODE233X | GENE1137X | NODE4X    | 0.9954833984375  |
| NODE234X | GENE1876X | GENE1338X | 0.9954833984375  |
| NODE235X | GENE1395X | GENE1639X | 0.9954833984375  |
| NODE236X | GENE2630X | GENE13X   | 0.99542236328125 |
| NODE237X | GENE257X  | GENE258X  | 0.99542236328125 |
| NODE238X | GENE738X  | GENE701X  | 0.99542236328125 |
| NODE239X | GENE1354X | GENE751X  | 0.99542236328125 |
| NODE240X | GENE2034X | GENE1140X | 0.99542236328125 |
| NODE241X | NODE74X   | GENE2491X | 0.99542236328125 |
| NODE242X | GENE2657X | NODE162X  | 0.99542236328125 |
| NODE243X | GENE551X  | GENE571X  | 0.995361328125   |
| NODE244X | GENE2367X | GENE1245X | 0.995361328125   |
| NODE245X | GENE2055X | GENE2391X | 0.995361328125   |
| NODE246X | GENE497X  | GENE1944X | 0.99530029296875 |
| NODE247X | GENE2442X | GENE700X  | 0.99530029296875 |
| NODE248X | GENE2297X | GENE2485X | 0.99530029296875 |
| NODE249X | GENE1474X | GENE362X  | 0.9952392578125  |
| NODE250X | GENE2207X | GENE363X  | 0.9952392578125  |
| NODE251X | GENE374X  | NODE25X   | 0.9952392578125  |
| NODE252X | GENE422X  | GENE423X  | 0.9952392578125  |
| NODE253X | GENE2243X | GENE1020X | 0.9952392578125  |
| NODE254X | NODE138X  | GENE375X  | 0.99517822265625 |
| NODE255X | GENE1694X | GENE697X  | 0.99517822265625 |
| NODE256X | GENE902X  | GENE1813X | 0.99517822265625 |
| NODE257X | GENE1419X | GENE1550X | 0.99517822265625 |
| NODE258X | GENE2459X | GENE281X  | 0.9951171875     |
| NODE259X | GENE792X  | GENE283X  | 0.9951171875     |
| NODE260X | GENE404X  | GENE1674X | 0.9951171875     |
| NODE261X | NODE181X  | GENE956X  | 0.9951171875     |
| NODE262X | NODE28X   | GENE1561X | 0.9951171875     |
| NODE263X | NODE84X   | NODE85X   | 0.9951171875     |
| NODE264X | GENE1161X | GENE2670X | 0.99505615234375 |
| NODE265X | GENE324X  | GENE1208X | 0.9949951171875  |
| NODE266X | GENE976X  | GENE521X  | 0.9949951171875  |
| NODE267X | GENE967X  | NODE61X   | 0.9949951171875  |
| NODE268X | NODE134X  | GENE1444X | 0.9949951171875  |
| NODE269X | GENE2216X | GENE2180X | 0.9949951171875  |
| NODE270X | NODE83X   | NODE56X   | 0.9949951171875  |
| NODE271X | GENE292X  | NODE186X  | 0.9949951171875  |
| NODE272X | GENE962X  | GENE454X  | 0.99493408203125 |
| NODE273X | GENE468X  | GENE1522X | 0.99493408203125 |
| NODE274X | GENE871X  | GENE1711X | 0.99493408203125 |
| NODE275X | GENE984X  | GENE2081X | 0.99493408203125 |
| NODE276X | GENE1311X | NODE71X   | 0.99493408203125 |
| NODE277X | GENE1814X | GENE2168X | 0.99493408203125 |
| NODE278X | GENE2208X | GENE1966X | 0.99493408203125 |
| NODE279X | NODE131X  | NODE212X  | 0.99493408203125 |
| NODE280X | GENE517X  | GENE1296X | 0.994873046875   |
| NODE281X | GENE555X  | GENE2355X | 0.994873046875   |
| NODE282X | GENE1086X | GENE889X  | 0.994873046875   |
| NODE283X | GENE1119X | GENE2222X | 0.994873046875   |
| NODE284X | GENE1224X | GENE1670X | 0.994873046875   |
| NODE285X | GENE1863X | GENE11X   | 0.99481201171875 |

|          |           |           |                  |
|----------|-----------|-----------|------------------|
| NODE286X | NODE105X  | GENE1871X | 0.99481201171875 |
| NODE287X | GENE536X  | GENE382X  | 0.9947509765625  |
| NODE288X | GENE438X  | GENE473X  | 0.9947509765625  |
| NODE289X | GENE1661X | GENE785X  | 0.9947509765625  |
| NODE290X | GENE1244X | NODE50X   | 0.9947509765625  |
| NODE291X | GENE2437X | GENE2087X | 0.9947509765625  |
| NODE292X | GENE425X  | GENE2203X | 0.99468994140625 |
| NODE293X | GENE840X  | GENE1310X | 0.99468994140625 |
| NODE294X | GENE1698X | GENE939X  | 0.99468994140625 |
| NODE295X | GENE1211X | GENE1093X | 0.99468994140625 |
| NODE296X | GENE2035X | NODE54X   | 0.99468994140625 |
| NODE297X | NODE169X  | GENE2289X | 0.99468994140625 |
| NODE298X | NODE144X  | NODE159X  | 0.99468994140625 |
| NODE299X | NODE80X   | GENE198X  | 0.99462890625    |
| NODE300X | GENE316X  | NODE213X  | 0.99462890625    |
| NODE301X | GENE498X  | GENE1795X | 0.99462890625    |
| NODE302X | NODE96X   | GENE636X  | 0.99462890625    |
| NODE303X | GENE1012X | GENE2244X | 0.99462890625    |
| NODE304X | GENE601X  | NODE108X  | 0.99462890625    |
| NODE305X | GENE2076X | GENE237X  | 0.99456787109375 |
| NODE306X | GENE240X  | GENE2235X | 0.99456787109375 |
| NODE307X | GENE428X  | GENE429X  | 0.99456787109375 |
| NODE308X | GENE1602X | GENE654X  | 0.99456787109375 |
| NODE309X | GENE937X  | NODE24X   | 0.99456787109375 |
| NODE310X | GENE2429X | GENE1767X | 0.99456787109375 |
| NODE311X | GENE2675X | GENE2186X | 0.99456787109375 |
| NODE312X | GENE2620X | GENE2495X | 0.99456787109375 |
| NODE313X | GENE519X  | GENE689X  | 0.9945068359375  |
| NODE314X | GENE631X  | GENE2213X | 0.9945068359375  |
| NODE315X | GENE1350X | GENE679X  | 0.9945068359375  |
| NODE316X | GENE863X  | GENE1807X | 0.9945068359375  |
| NODE317X | GENE1723X | GENE938X  | 0.9945068359375  |
| NODE318X | NODE260X  | GENE29X   | 0.9945068359375  |
| NODE319X | GENE759X  | GENE2388X | 0.99444580078125 |
| NODE320X | GENE1642X | NODE55X   | 0.99444580078125 |
| NODE321X | NODE136X  | GENE1676X | 0.99444580078125 |
| NODE322X | GENE2677X | GENE1833X | 0.99444580078125 |
| NODE323X | NODE149X  | NODE29X   | 0.99444580078125 |
| NODE324X | GENE1403X | GENE20X   | 0.994384765625   |
| NODE325X | GENE2185X | GENE1104X | 0.994384765625   |
| NODE326X | NODE115X  | NODE38X   | 0.994384765625   |
| NODE327X | GENE48X   | NODE79X   | 0.99432373046875 |
| NODE328X | NODE137X  | GENE120X  | 0.99432373046875 |
| NODE329X | GENE1389X | GENE50X   | 0.9942626953125  |
| NODE330X | GENE447X  | GENE133X  | 0.9942626953125  |
| NODE331X | NODE140X  | GENE172X  | 0.9942626953125  |
| NODE332X | GENE548X  | GENE1292X | 0.9942626953125  |
| NODE333X | GENE123X  | NODE64X   | 0.99420166015625 |
| NODE334X | NODE87X   | GENE1177X | 0.99420166015625 |
| NODE335X | NODE173X  | NODE127X  | 0.99420166015625 |
| NODE336X | GENE809X  | GENE77X   | 0.994140625      |
| NODE337X | GENE781X  | GENE421X  | 0.994140625      |
| NODE338X | GENE1731X | GENE1479X | 0.994140625      |
| NODE339X | GENE1715X | GENE303X  | 0.99407958984375 |
| NODE340X | GENE315X  | GENE711X  | 0.99407958984375 |
| NODE341X | GENE410X  | GENE1082X | 0.99407958984375 |
| NODE342X | GENE1604X | GENE489X  | 0.99407958984375 |

|          |           |           |                  |
|----------|-----------|-----------|------------------|
| NODE343X | GENE1359X | GENE611X  | 0.99407958984375 |
| NODE344X | GENE1475X | GENE1330X | 0.99407958984375 |
| NODE345X | GENE1741X | GENE1683X | 0.99407958984375 |
| NODE346X | GENE99X   | NODE117X  | 0.9940185546875  |
| NODE347X | GENE135X  | GENE136X  | 0.9940185546875  |
| NODE348X | NODE182X  | GENE736X  | 0.9940185546875  |
| NODE349X | NODE189X  | GENE203X  | 0.9940185546875  |
| NODE350X | GENE67X   | GENE1596X | 0.99395751953125 |
| NODE351X | GENE2404X | GENE1279X | 0.99383544921875 |
| NODE352X | GENE1553X | GENE1554X | 0.99383544921875 |
| NODE353X | GENE1841X | GENE2288X | 0.99383544921875 |
| NODE354X | GENE187X  | NODE1X    | 0.99383544921875 |
| NODE355X | GENE15X   | GENE1160X | 0.9937744140625  |
| NODE356X | GENE617X  | NODE92X   | 0.9937744140625  |
| NODE357X | GENE981X  | GENE1787X | 0.9937744140625  |
| NODE358X | GENE2562X | GENE1223X | 0.9937744140625  |
| NODE359X | GENE2008X | NODE315X  | 0.9937744140625  |
| NODE360X | GENE2194X | NODE243X  | 0.9937744140625  |
| NODE361X | NODE82X   | NODE179X  | 0.9937744140625  |
| NODE362X | GENE2533X | GENE407X  | 0.99371337890625 |
| NODE363X | GENE1886X | GENE514X  | 0.99371337890625 |
| NODE364X | GENE1049X | GENE7X    | 0.99365234375    |
| NODE365X | GENE2325X | NODE191X  | 0.99365234375    |
| NODE366X | GENE2354X | GENE2467X | 0.99365234375    |
| NODE367X | GENE1105X | NODE278X  | 0.99365234375    |
| NODE368X | GENE825X  | GENE1543X | 0.99359130859375 |
| NODE369X | GENE1355X | GENE1737X | 0.99359130859375 |
| NODE370X | GENE1901X | GENE2464X | 0.99359130859375 |
| NODE371X | GENE560X  | GENE2249X | 0.9935302734375  |
| NODE372X | GENE585X  | GENE1999X | 0.9935302734375  |
| NODE373X | GENE2512X | GENE1393X | 0.9935302734375  |
| NODE374X | GENE1706X | GENE1545X | 0.9935302734375  |
| NODE375X | GENE2284X | GENE1651X | 0.9935302734375  |
| NODE376X | GENE2669X | NODE272X  | 0.9935302734375  |
| NODE377X | GENE920X  | GENE262X  | 0.99346923828125 |
| NODE378X | GENE570X  | GENE1287X | 0.99346923828125 |
| NODE379X | GENE644X  | GENE1381X | 0.99346923828125 |
| NODE380X | GENE2128X | GENE858X  | 0.99346923828125 |
| NODE381X | GENE891X  | GENE2508X | 0.99346923828125 |
| NODE382X | GENE1014X | GENE2253X | 0.99346923828125 |
| NODE383X | GENE1560X | GENE1620X | 0.99346923828125 |
| NODE384X | GENE2507X | GENE2182X | 0.99346923828125 |
| NODE385X | GENE27X   | GENE2098X | 0.993408203125   |
| NODE386X | NODE47X   | GENE268X  | 0.993408203125   |
| NODE387X | GENE2078X | GENE356X  | 0.993408203125   |
| NODE388X | GENE530X  | GENE1226X | 0.993408203125   |
| NODE389X | GENE888X  | GENE2523X | 0.993408203125   |
| NODE390X | NODE90X   | GENE1074X | 0.993408203125   |
| NODE391X | GENE2111X | GENE124X  | 0.99334716796875 |
| NODE392X | GENE174X  | GENE2074X | 0.99334716796875 |
| NODE393X | GENE445X  | GENE1769X | 0.9932861328125  |
| NODE394X | GENE1943X | GENE1288X | 0.9932861328125  |
| NODE395X | GENE1520X | GENE2193X | 0.9932861328125  |
| NODE396X | GENE2582X | GENE2637X | 0.9932861328125  |
| NODE397X | NODE104X  | NODE124X  | 0.9932861328125  |
| NODE398X | NODE187X  | NODE319X  | 0.99322509765625 |
| NODE399X | GENE2382X | GENE846X  | 0.9931640625     |

|          |           |           |                  |
|----------|-----------|-----------|------------------|
| NODE400X | GENE1789X | GENE1342X | 0.9931640625     |
| NODE401X | GENE1777X | GENE2295X | 0.9931640625     |
| NODE402X | NODE41X   | GENE1953X | 0.9931640625     |
| NODE403X | GENE2668X | GENE2108X | 0.9931640625     |
| NODE404X | NODE72X   | NODE153X  | 0.9931640625     |
| NODE405X | GENE1784X | NODE107X  | 0.9931640625     |
| NODE406X | GENE197X  | GENE1534X | 0.99310302734375 |
| NODE407X | GENE416X  | GENE2067X | 0.99310302734375 |
| NODE408X | GENE775X  | NODE224X  | 0.99310302734375 |
| NODE409X | GENE818X  | GENE1295X | 0.99310302734375 |
| NODE410X | GENE2026X | GENE1183X | 0.99310302734375 |
| NODE411X | GENE1325X | GENE1231X | 0.99310302734375 |
| NODE412X | NODE242X  | NODE165X  | 0.99310302734375 |
| NODE413X | NODE128X  | NODE230X  | 0.99310302734375 |
| NODE414X | GENE696X  | GENE1010X | 0.9930419921875  |
| NODE415X | GENE2398X | GENE979X  | 0.9930419921875  |
| NODE416X | GENE1864X | NODE133X  | 0.9930419921875  |
| NODE417X | NODE333X  | NODE119X  | 0.9930419921875  |
| NODE418X | NODE154X  | GENE394X  | 0.9930419921875  |
| NODE419X | GENE60X   | GENE211X  | 0.99298095703125 |
| NODE420X | GENE1773X | GENE328X  | 0.99298095703125 |
| NODE421X | GENE716X  | NODE37X   | 0.99298095703125 |
| NODE422X | GENE2585X | GENE2454X | 0.99298095703125 |
| NODE423X | GENE1106X | NODE259X  | 0.99298095703125 |
| NODE424X | GENE493X  | NODE76X   | 0.992919921875   |
| NODE425X | GENE672X  | GENE559X  | 0.992919921875   |
| NODE426X | GENE1358X | NODE151X  | 0.992919921875   |
| NODE427X | GENE1471X | NODE156X  | 0.992919921875   |
| NODE428X | GENE2174X | GENE2010X | 0.992919921875   |
| NODE429X | NODE65X   | GENE1181X | 0.992919921875   |
| NODE430X | GENE319X  | GENE999X  | 0.99285888671875 |
| NODE431X | GENE485X  | GENE1791X | 0.99285888671875 |
| NODE432X | GENE816X  | GENE1962X | 0.99285888671875 |
| NODE433X | GENE2426X | GENE1529X | 0.99285888671875 |
| NODE434X | GENE1668X | GENE2070X | 0.99285888671875 |
| NODE435X | NODE125X  | GENE2095X | 0.99285888671875 |
| NODE436X | GENE2127X | GENE2475X | 0.99285888671875 |
| NODE437X | GENE596X  | GENE2083X | 0.9927978515625  |
| NODE438X | GENE1180X | GENE2588X | 0.9927978515625  |
| NODE439X | NODE126X  | GENE1255X | 0.9927978515625  |
| NODE440X | GENE2615X | GENE1301X | 0.9927978515625  |
| NODE441X | NODE135X  | NODE345X  | 0.9927978515625  |
| NODE442X | GENE1018X | GENE1367X | 0.99273681640625 |
| NODE443X | GENE132X  | GENE968X  | 0.99267578125    |
| NODE444X | GENE134X  | GENE541X  | 0.99267578125    |
| NODE445X | GENE2001X | GENE1828X | 0.99267578125    |
| NODE446X | GENE121X  | GENE2321X | 0.99261474609375 |
| NODE447X | GENE762X  | GENE340X  | 0.99261474609375 |
| NODE448X | GENE1872X | GENE834X  | 0.99261474609375 |
| NODE449X | GENE1044X | GENE1937X | 0.99261474609375 |
| NODE450X | NODE274X  | GENE2016X | 0.99261474609375 |
| NODE451X | NODE267X  | GENE1317X | 0.9925537109375  |
| NODE452X | GENE2080X | GENE2294X | 0.9925537109375  |
| NODE453X | GENE2531X | GENE2272X | 0.9925537109375  |
| NODE454X | NODE229X  | GENE95X   | 0.99249267578125 |
| NODE455X | GENE542X  | GENE1512X | 0.99249267578125 |
| NODE456X | GENE1538X | GENE603X  | 0.99249267578125 |



|          |           |           |                  |
|----------|-----------|-----------|------------------|
| NODE457X | GENE2538X | GENE1822X | 0.99249267578125 |
| NODE458X | GENE2671X | GENE2361X | 0.99249267578125 |
| NODE459X | GENE593X  | GENE2257X | 0.992431640625   |
| NODE460X | GENE1696X | GENE1695X | 0.992431640625   |
| NODE461X | GENE45X   | GENE1053X | 0.99237060546875 |
| NODE462X | GENE230X  | GENE1284X | 0.99237060546875 |
| NODE463X | GENE1391X | GENE1658X | 0.99237060546875 |
| NODE464X | GENE2667X | GENE652X  | 0.9923095703125  |
| NODE465X | NODE289X  | GENE1134X | 0.99224853515625 |
| NODE466X | GENE2220X | GENE1566X | 0.99224853515625 |
| NODE467X | NODE101X  | NODE99X   | 0.99224853515625 |
| NODE468X | NODE269X  | GENE1437X | 0.99224853515625 |
| NODE469X | GENE128X  | NODE385X  | 0.9921875        |
| NODE470X | GENE1051X | GENE169X  | 0.9921875        |
| NODE471X | GENE912X  | NODE293X  | 0.9921875        |
| NODE472X | NODE118X  | NODE304X  | 0.9921875        |
| NODE473X | GENE508X  | GENE2223X | 0.99212646484375 |
| NODE474X | GENE1333X | GENE1070X | 0.99212646484375 |
| NODE475X | GENE1794X | GENE1118X | 0.99212646484375 |
| NODE476X | GENE1252X | GENE1253X | 0.99212646484375 |
| NODE477X | GENE1572X | NODE371X  | 0.99212646484375 |
| NODE478X | GENE747X  | GENE986X  | 0.9920654296875  |
| NODE479X | GENE1975X | GENE1083X | 0.9920654296875  |
| NODE480X | GENE1887X | GENE1399X | 0.9920654296875  |
| NODE481X | GENE1857X | GENE1967X | 0.9920654296875  |
| NODE482X | NODE160X  | NODE251X  | 0.9920654296875  |
| NODE483X | GENE1497X | GENE855X  | 0.99200439453125 |
| NODE484X | GENE998X  | GENE1184X | 0.99200439453125 |
| NODE485X | NODE277X  | GENE2311X | 0.99200439453125 |
| NODE486X | GENE2423X | GENE2381X | 0.99200439453125 |
| NODE487X | GENE2600X | GENE2601X | 0.99200439453125 |
| NODE488X | GENE850X  | GENE1162X | 0.991943359375   |
| NODE489X | GENE2204X | GENE993X  | 0.991943359375   |
| NODE490X | GENE2051X | GENE1057X | 0.991943359375   |
| NODE491X | GENE1251X | GENE1646X | 0.991943359375   |
| NODE492X | GENE1276X | GENE1804X | 0.991943359375   |
| NODE493X | GENE1327X | GENE2613X | 0.991943359375   |
| NODE494X | GENE1898X | GENE1699X | 0.991943359375   |
| NODE495X | GENE2143X | NODE322X  | 0.991943359375   |
| NODE496X | GENE1555X | GENE269X  | 0.99188232421875 |
| NODE497X | GENE878X  | GENE1783X | 0.99188232421875 |
| NODE498X | GENE1328X | GENE2188X | 0.99188232421875 |
| NODE499X | GENE2162X | GENE2161X | 0.99188232421875 |
| NODE500X | NODE145X  | GENE1379X | 0.9918212890625  |
| NODE501X | GENE2150X | GENE2342X | 0.9918212890625  |
| NODE502X | NODE305X  | NODE174X  | 0.9918212890625  |
| NODE503X | GENE2062X | GENE25X   | 0.99176025390625 |
| NODE504X | GENE160X  | GENE280X  | 0.99176025390625 |
| NODE505X | GENE1152X | GENE1929X | 0.99176025390625 |
| NODE506X | GENE2431X | NODE203X  | 0.99176025390625 |
| NODE507X | NODE158X  | NODE266X  | 0.99176025390625 |
| NODE508X | NODE417X  | NODE59X   | 0.99176025390625 |
| NODE509X | GENE370X  | NODE33X   | 0.99169921875    |
| NODE510X | GENE734X  | GENE1088X | 0.99169921875    |
| NODE511X | GENE1810X | NODE143X  | 0.99169921875    |
| NODE512X | GENE4X    | NODE193X  | 0.99169921875    |
| NODE513X | GENE690X  | GENE1750X | 0.99163818359375 |

|          |           |           |                  |
|----------|-----------|-----------|------------------|
| NODE514X | GENE1030X | GENE928X  | 0.99163818359375 |
| NODE515X | GENE764X  | NODE175X  | 0.99163818359375 |
| NODE516X | GENE70X   | GENE713X  | 0.9915771484375  |
| NODE517X | GENE75X   | NODE256X  | 0.9915771484375  |
| NODE518X | GENE415X  | GENE1455X | 0.9915771484375  |
| NODE519X | NODE262X  | GENE403X  | 0.9915771484375  |
| NODE520X | GENE2266X | GENE397X  | 0.99151611328125 |
| NODE521X | GENE2280X | GENE1649X | 0.99151611328125 |
| NODE522X | GENE2390X | GENE2384X | 0.99151611328125 |
| NODE523X | NODE121X  | GENE119X  | 0.991455078125   |
| NODE524X | GENE443X  | GENE1446X | 0.991455078125   |
| NODE525X | GENE2134X | GENE516X  | 0.991455078125   |
| NODE526X | GENE1839X | GENE1533X | 0.991455078125   |
| NODE527X | GENE2006X | GENE1905X | 0.991455078125   |
| NODE528X | NODE396X  | GENE1805X | 0.991455078125   |
| NODE529X | GENE1908X | GENE2172X | 0.99139404296875 |
| NODE530X | NODE120X  | GENE2107X | 0.99139404296875 |
| NODE531X | NODE161X  | GENE19X   | 0.9913330078125  |
| NODE532X | GENE1764X | GENE62X   | 0.9913330078125  |
| NODE533X | GENE306X  | GENE2040X | 0.9913330078125  |
| NODE534X | NODE336X  | GENE1006X | 0.9913330078125  |
| NODE535X | NODE311X  | NODE183X  | 0.99127197265625 |
| NODE536X | NODE331X  | NODE290X  | 0.99127197265625 |
| NODE537X | GENE1569X | GENE254X  | 0.9912109375     |
| NODE538X | GENE1722X | NODE69X   | 0.9912109375     |
| NODE539X | GENE1781X | GENE282X  | 0.99114990234375 |
| NODE540X | GENE479X  | NODE93X   | 0.99114990234375 |
| NODE541X | NODE339X  | GENE647X  | 0.99114990234375 |
| NODE542X | GENE2445X | GENE1323X | 0.99114990234375 |
| NODE543X | NODE86X   | GENE358X  | 0.9910888671875  |
| NODE544X | GENE538X  | GENE953X  | 0.9910888671875  |
| NODE545X | GENE1598X | GENE1167X | 0.9910888671875  |
| NODE546X | GENE2159X | NODE244X  | 0.9910888671875  |
| NODE547X | GENE1095X | NODE297X  | 0.9910888671875  |
| NODE548X | NODE334X  | NODE335X  | 0.9910888671875  |
| NODE549X | GENE1745X | NODE380X  | 0.9910888671875  |
| NODE550X | GENE1496X | NODE423X  | 0.9910888671875  |
| NODE551X | GENE361X  | GENE1600X | 0.99102783203125 |
| NODE552X | GENE2189X | GENE1978X | 0.99102783203125 |
| NODE553X | NODE102X  | NODE261X  | 0.99102783203125 |
| NODE554X | GENE728X  | GENE2389X | 0.990966796875   |
| NODE555X | GENE1392X | NODE62X   | 0.990966796875   |
| NODE556X | GENE359X  | GENE907X  | 0.99090576171875 |
| NODE557X | GENE1420X | GENE1233X | 0.99090576171875 |
| NODE558X | GENE1848X | GENE1347X | 0.99090576171875 |
| NODE559X | NODE228X  | GENE1432X | 0.99090576171875 |
| NODE560X | GENE2417X | GENE1616X | 0.99090576171875 |
| NODE561X | NODE416X  | NODE313X  | 0.99090576171875 |
| NODE562X | NODE361X  | NODE163X  | 0.99090576171875 |
| NODE563X | GENE1433X | GENE444X  | 0.9908447265625  |
| NODE564X | GENE2347X | GENE769X  | 0.9908447265625  |
| NODE565X | GENE39X   | NODE472X  | 0.99078369140625 |
| NODE566X | GENE194X  | GENE988X  | 0.99078369140625 |
| NODE567X | NODE355X  | GENE2395X | 0.99078369140625 |
| NODE568X | NODE314X  | GENE2386X | 0.99078369140625 |
| NODE569X | GENE12X   | NODE210X  | 0.99066162109375 |
| NODE570X | GENE1582X | GENE395X  | 0.99066162109375 |

|          |           |           |                  |
|----------|-----------|-----------|------------------|
| NODE571X | GENE523X  | NODE147X  | 0.99066162109375 |
| NODE572X | GENE2126X | GENE671X  | 0.99066162109375 |
| NODE573X | GENE1615X | GENE1448X | 0.99066162109375 |
| NODE574X | GENE2246X | GENE2612X | 0.99066162109375 |
| NODE575X | NODE98X   | NODE302X  | 0.99066162109375 |
| NODE576X | GENE51X   | GENE608X  | 0.9906005859375  |
| NODE577X | GENE588X  | GENE827X  | 0.99053955078125 |
| NODE578X | GENE1842X | GENE1113X | 0.99053955078125 |
| NODE579X | GENE2622X | GENE2273X | 0.99053955078125 |
| NODE580X | NODE222X  | NODE216X  | 0.99053955078125 |
| NODE581X | NODE325X  | GENE918X  | 0.99053955078125 |
| NODE582X | NODE265X  | NODE415X  | 0.99053955078125 |
| NODE583X | GENE441X  | GENE1521X | 0.990478515625   |
| NODE584X | GENE2131X | GENE927X  | 0.990478515625   |
| NODE585X | NODE171X  | GENE2349X | 0.990478515625   |
| NODE586X | NODE386X  | NODE155X  | 0.990478515625   |
| NODE587X | GENE1502X | NODE459X  | 0.990478515625   |
| NODE588X | GENE353X  | GENE567X  | 0.99041748046875 |
| NODE589X | GENE453X  | GENE1028X | 0.99041748046875 |
| NODE590X | GENE1641X | GENE739X  | 0.99041748046875 |
| NODE591X | NODE379X  | GENE1958X | 0.99041748046875 |
| NODE592X | GENE274X  | GENE1626X | 0.9903564453125  |
| NODE593X | GENE1659X | GENE2211X | 0.9903564453125  |
| NODE594X | GENE2133X | GENE2370X | 0.9903564453125  |
| NODE595X | GENE1513X | GENE277X  | 0.99029541015625 |
| NODE596X | GENE643X  | GENE1629X | 0.99029541015625 |
| NODE597X | GENE872X  | GENE2346X | 0.99029541015625 |
| NODE598X | GENE1667X | GENE2647X | 0.99029541015625 |
| NODE599X | GENE1891X | NODE233X  | 0.99029541015625 |
| NODE600X | GENE2353X | NODE35X   | 0.99029541015625 |
| NODE601X | NODE215X  | NODE327X  | 0.99029541015625 |
| NODE602X | NODE320X  | NODE338X  | 0.99029541015625 |
| NODE603X | GENE1788X | GENE34X   | 0.990234375      |
| NODE604X | GENE1903X | GENE2486X | 0.990234375      |
| NODE605X | GENE1916X | NODE231X  | 0.990234375      |
| NODE606X | GENE2520X | GENE1981X | 0.990234375      |
| NODE607X | GENE2187X | NODE141X  | 0.990234375      |
| NODE608X | NODE111X  | GENE140X  | 0.990234375      |
| NODE609X | GENE305X  | GENE349X  | 0.99017333984375 |
| NODE610X | NODE326X  | NODE207X  | 0.99017333984375 |
| NODE611X | GENE448X  | GENE1227X | 0.9901123046875  |
| NODE612X | GENE1628X | GENE1904X | 0.9901123046875  |
| NODE613X | GENE2307X | GENE2217X | 0.9901123046875  |
| NODE614X | NODE446X  | GENE44X   | 0.9901123046875  |
| NODE615X | GENE430X  | GENE2526X | 0.99005126953125 |
| NODE616X | GENE1090X | GENE1004X | 0.99005126953125 |
| NODE617X | NODE172X  | NODE615X  | 0.99005126953125 |
| NODE618X | GENE207X  | GENE527X  | 0.989990234375   |
| NODE619X | GENE2054X | GENE1405X | 0.989990234375   |
| NODE620X | NODE374X  | GENE2169X | 0.989990234375   |
| NODE621X | GENE2608X | GENE2380X | 0.989990234375   |
| NODE622X | GENE1879X | NODE431X  | 0.989990234375   |
| NODE623X | GENE54X   | GENE2033X | 0.98992919921875 |
| NODE624X | GENE1684X | GENE532X  | 0.98992919921875 |
| NODE625X | GENE784X  | NODE286X  | 0.98992919921875 |
| NODE626X | GENE2309X | GENE1733X | 0.9898681640625  |
| NODE627X | GENE2024X | NODE391X  | 0.9898681640625  |

|          |           |           |                  |
|----------|-----------|-----------|------------------|
| NODE628X | NODE531X  | NODE113X  | 0.9898681640625  |
| NODE629X | GENE52X   | GENE1396X | 0.98980712890625 |
| NODE630X | GENE452X  | GENE1200X | 0.98980712890625 |
| NODE631X | GENE810X  | GENE2373X | 0.98980712890625 |
| NODE632X | GENE908X  | GENE2165X | 0.98980712890625 |
| NODE633X | NODE353X  | GENE1066X | 0.98980712890625 |
| NODE634X | NODE372X  | GENE2378X | 0.98980712890625 |
| NODE635X | NODE196X  | NODE279X  | 0.98980712890625 |
| NODE636X | GENE903X  | GENE1926X | 0.98974609375    |
| NODE637X | GENE1003X | GENE1261X | 0.98974609375    |
| NODE638X | GENE1558X | GENE1557X | 0.98974609375    |
| NODE639X | NODE394X  | NODE439X  | 0.98974609375    |
| NODE640X | GENE2310X | GENE1657X | 0.98968505859375 |
| NODE641X | NODE280X  | GENE605X  | 0.98968505859375 |
| NODE642X | GENE1410X | NODE309X  | 0.98968505859375 |
| NODE643X | GENE1594X | GENE2490X | 0.9896240234375  |
| NODE644X | NODE312X  | GENE2660X | 0.9896240234375  |
| NODE645X | NODE220X  | NODE177X  | 0.9896240234375  |
| NODE646X | NODE317X  | NODE240X  | 0.9896240234375  |
| NODE647X | GENE1029X | GENE398X  | 0.98956298828125 |
| NODE648X | GENE598X  | GENE801X  | 0.98956298828125 |
| NODE649X | NODE214X  | GENE1511X | 0.98944091796875 |
| NODE650X | NODE188X  | GENE2345X | 0.98944091796875 |
| NODE651X | NODE351X  | GENE89X   | 0.9893798828125  |
| NODE652X | GENE372X  | GENE752X  | 0.9893798828125  |
| NODE653X | GENE2473X | GENE1531X | 0.9893798828125  |
| NODE654X | GENE2221X | GENE2136X | 0.9893798828125  |
| NODE655X | GENE2517X | NODE466X  | 0.9893798828125  |
| NODE656X | NODE100X  | NODE532X  | 0.98931884765625 |
| NODE657X | GENE73X   | GENE2326X | 0.9892578125     |
| NODE658X | GENE2621X | GENE712X  | 0.9892578125     |
| NODE659X | GENE1853X | GENE2499X | 0.9892578125     |
| NODE660X | NODE253X  | NODE288X  | 0.9892578125     |
| NODE661X | NODE440X  | GENE400X  | 0.98919677734375 |
| NODE662X | GENE424X  | GENE2335X | 0.98919677734375 |
| NODE663X | NODE190X  | GENE539X  | 0.98919677734375 |
| NODE664X | GENE1242X | GENE1577X | 0.98919677734375 |
| NODE665X | GENE1341X | GENE2293X | 0.98919677734375 |
| NODE666X | NODE399X  | NODE150X  | 0.98919677734375 |
| NODE667X | GENE502X  | GENE342X  | 0.9891357421875  |
| NODE668X | GENE1976X | GENE426X  | 0.9891357421875  |
| NODE669X | GENE1039X | GENE1563X | 0.9891357421875  |
| NODE670X | GENE1340X | GENE2453X | 0.9891357421875  |
| NODE671X | GENE83X   | GENE2344X | 0.98907470703125 |
| NODE672X | GENE504X  | GENE1476X | 0.98907470703125 |
| NODE673X | GENE2411X | GENE8X    | 0.989013671875   |
| NODE674X | GENE715X  | GENE2268X | 0.989013671875   |
| NODE675X | GENE2327X | GENE719X  | 0.989013671875   |
| NODE676X | GENE1825X | GENE2069X | 0.989013671875   |
| NODE677X | GENE2279X | GENE2556X | 0.989013671875   |
| NODE678X | NODE486X  | GENE1840X | 0.989013671875   |
| NODE679X | GENE1850X | GENE1126X | 0.98895263671875 |
| NODE680X | GENE2241X | NODE427X  | 0.98895263671875 |
| NODE681X | GENE2245X | GENE2587X | 0.98895263671875 |
| NODE682X | GENE2278X | NODE227X  | 0.98895263671875 |
| NODE683X | GENE65X   | GENE1451X | 0.9888916015625  |
| NODE684X | GENE1275X | GENE2435X | 0.9888916015625  |

|          |           |           |                  |
|----------|-----------|-----------|------------------|
| NODE685X | GENE1472X | GENE1907X | 0.9888916015625  |
| NODE686X | GENE1565X | GENE1778X | 0.9888916015625  |
| NODE687X | GENE934X  | GENE2209X | 0.98883056640625 |
| NODE688X | GENE955X  | NODE473X  | 0.98883056640625 |
| NODE689X | NODE275X  | NODE254X  | 0.98883056640625 |
| NODE690X | NODE424X  | NODE323X  | 0.98883056640625 |
| NODE691X | NODE167X  | NODE301X  | 0.98876953125    |
| NODE692X | GENE1662X | GENE1681X | 0.98870849609375 |
| NODE693X | GENE419X  | GENE1640X | 0.9886474609375  |
| NODE694X | GENE1034X | NODE148X  | 0.9886474609375  |
| NODE695X | NODE303X  | GENE1191X | 0.9886474609375  |
| NODE696X | GENE1570X | GENE507X  | 0.988525390625   |
| NODE697X | GENE1278X | GENE1742X | 0.988525390625   |
| NODE698X | NODE593X  | GENE1073X | 0.988525390625   |
| NODE699X | GENE28X   | GENE2471X | 0.98846435546875 |
| NODE700X | GENE418X  | GENE94X   | 0.98846435546875 |
| NODE701X | GENE2501X | GENE325X  | 0.98846435546875 |
| NODE702X | GENE368X  | GENE2191X | 0.98846435546875 |
| NODE703X | GENE222X  | GENE202X  | 0.9884033203125  |
| NODE704X | GENE965X  | GENE1190X | 0.9884033203125  |
| NODE705X | GENE1798X | NODE328X  | 0.9884033203125  |
| NODE706X | NODE564X  | NODE180X  | 0.9884033203125  |
| NODE707X | GENE2178X | GENE85X   | 0.98834228515625 |
| NODE708X | NODE218X  | GENE568X  | 0.98834228515625 |
| NODE709X | GENE1220X | GENE1204X | 0.98834228515625 |
| NODE710X | NODE558X  | NODE247X  | 0.98834228515625 |
| NODE711X | GENE1717X | GENE648X  | 0.98828125       |
| NODE712X | GENE1136X | GENE817X  | 0.98828125       |
| NODE713X | GENE1567X | GENE2290X | 0.98828125       |
| NODE714X | NODE170X  | NODE208X  | 0.98828125       |
| NODE715X | GENE390X  | NODE46X   | 0.98822021484375 |
| NODE716X | GENE808X  | GENE456X  | 0.98822021484375 |
| NODE717X | NODE451X  | NODE321X  | 0.9881591796875  |
| NODE718X | GENE865X  | GENE683X  | 0.988037109375   |
| NODE719X | NODE457X  | GENE2317X | 0.988037109375   |
| NODE720X | NODE129X  | NODE264X  | 0.988037109375   |
| NODE721X | NODE549X  | NODE200X  | 0.988037109375   |
| NODE722X | NODE217X  | NODE270X  | 0.988037109375   |
| NODE723X | GENE2635X | GENE1753X | 0.98797607421875 |
| NODE724X | NODE296X  | NODE400X  | 0.98797607421875 |
| NODE725X | NODE528X  | GENE1792X | 0.9879150390625  |
| NODE726X | GENE458X  | GENE2518X | 0.98785400390625 |
| NODE727X | GENE2493X | GENE1869X | 0.98785400390625 |
| NODE728X | GENE2565X | NODE166X  | 0.98785400390625 |
| NODE729X | NODE382X  | GENE92X   | 0.98779296875    |
| NODE730X | GENE2569X | GENE783X  | 0.98779296875    |
| NODE731X | GENE932X  | NODE324X  | 0.98779296875    |
| NODE732X | GENE1335X | GENE1454X | 0.98779296875    |
| NODE733X | NODE413X  | NODE435X  | 0.98779296875    |
| NODE734X | GENE1809X | GENE272X  | 0.98773193359375 |
| NODE735X | GENE1344X | GENE726X  | 0.9876708984375  |
| NODE736X | GENE1144X | NODE481X  | 0.9876708984375  |
| NODE737X | GENE2409X | GENE2558X | 0.9876708984375  |
| NODE738X | GENE613X  | GENE1803X | 0.98760986328125 |
| NODE739X | GENE47X   | GENE2452X | 0.987548828125   |
| NODE740X | GENE170X  | GENE2363X | 0.987548828125   |
| NODE741X | GENE1401X | NODE467X  | 0.987548828125   |

|          |           |           |                  |
|----------|-----------|-----------|------------------|
| NODE742X | NODE515X  | GENE923X  | 0.987548828125   |
| NODE743X | GENE331X  | GENE1580X | 0.98748779296875 |
| NODE744X | GENE347X  | GENE909X  | 0.98748779296875 |
| NODE745X | GENE698X  | GENE177X  | 0.9874267578125  |
| NODE746X | GENE1280X | GENE1166X | 0.9874267578125  |
| NODE747X | GENE2530X | GENE2510X | 0.9874267578125  |
| NODE748X | GENE723X  | GENE873X  | 0.98736572265625 |
| NODE749X | GENE2142X | GENE1117X | 0.98736572265625 |
| NODE750X | NODE250X  | GENE1832X | 0.98736572265625 |
| NODE751X | GENE2470X | GENE2474X | 0.98736572265625 |
| NODE752X | NODE271X  | NODE157X  | 0.9873046875     |
| NODE753X | NODE226X  | GENE440X  | 0.98724365234375 |
| NODE754X | GENE757X  | GENE2468X | 0.98724365234375 |
| NODE755X | GENE2234X | GENE1116X | 0.98724365234375 |
| NODE756X | GENE1562X | NODE110X  | 0.98724365234375 |
| NODE757X | NODE299X  | NODE255X  | 0.98724365234375 |
| NODE758X | GENE145X  | GENE1980X | 0.9871826171875  |
| NODE759X | GENE474X  | GENE1321X | 0.98712158203125 |
| NODE760X | GENE2676X | GENE887X  | 0.98712158203125 |
| NODE761X | GENE2147X | NODE19X   | 0.98712158203125 |
| NODE762X | GENE184X  | GENE2267X | 0.987060546875   |
| NODE763X | GENE384X  | GENE1436X | 0.987060546875   |
| NODE764X | GENE1045X | GENE1675X | 0.987060546875   |
| NODE765X | GENE1373X | GENE1394X | 0.987060546875   |
| NODE766X | NODE588X  | NODE204X  | 0.987060546875   |
| NODE767X | NODE602X  | NODE263X  | 0.987060546875   |
| NODE768X | NODE436X  | NODE497X  | 0.987060546875   |
| NODE769X | GENE2255X | NODE428X  | 0.98699951171875 |
| NODE770X | GENE1232X | NODE480X  | 0.98699951171875 |
| NODE771X | NODE201X  | NODE607X  | 0.98699951171875 |
| NODE772X | NODE659X  | GENE2563X | 0.98699951171875 |
| NODE773X | GENE1536X | NODE342X  | 0.9869384765625  |
| NODE774X | GENE543X  | GENE899X  | 0.98687744140625 |
| NODE775X | NODE679X  | GENE87X   | 0.98687744140625 |
| NODE776X | GENE350X  | GENE2324X | 0.98681640625    |
| NODE777X | GENE310X  | GENE1319X | 0.98675537109375 |
| NODE778X | GENE335X  | GENE1957X | 0.98675537109375 |
| NODE779X | NODE152X  | GENE1052X | 0.98675537109375 |
| NODE780X | GENE1450X | GENE1364X | 0.98675537109375 |
| NODE781X | GENE1756X | NODE202X  | 0.98675537109375 |
| NODE782X | GENE1102X | NODE388X  | 0.98675537109375 |
| NODE783X | NODE223X  | GENE2073X | 0.98675537109375 |
| NODE784X | GENE609X  | GENE610X  | 0.9866943359375  |
| NODE785X | GENE2320X | GENE851X  | 0.9866943359375  |
| NODE786X | NODE397X  | NODE508X  | 0.9866943359375  |
| NODE787X | NODE449X  | NODE544X  | 0.9866943359375  |
| NODE788X | GENE1426X | GENE681X  | 0.98663330078125 |
| NODE789X | GENE371X  | NODE211X  | 0.986572265625   |
| NODE790X | GENE2160X | GENE1846X | 0.986572265625   |
| NODE791X | NODE600X  | GENE2323X | 0.986572265625   |
| NODE792X | GENE377X  | NODE164X  | 0.98651123046875 |
| NODE793X | GENE587X  | NODE112X  | 0.98651123046875 |
| NODE794X | GENE694X  | GENE1345X | 0.98651123046875 |
| NODE795X | GENE1009X | GENE1492X | 0.98651123046875 |
| NODE796X | GENE2114X | GENE1268X | 0.98651123046875 |
| NODE797X | GENE2117X | NODE510X  | 0.98651123046875 |
| NODE798X | NODE625X  | NODE610X  | 0.98651123046875 |

|          |           |           |                  |
|----------|-----------|-----------|------------------|
| NODE799X | GENE717X  | GENE173X  | 0.9864501953125  |
| NODE800X | NODE536X  | NODE298X  | 0.9864501953125  |
| NODE801X | GENE263X  | GENE1762X | 0.98638916015625 |
| NODE802X | GENE1314X | GENE1979X | 0.98638916015625 |
| NODE803X | GENE1222X | GENE963X  | 0.986328125      |
| NODE804X | GENE1494X | GENE2196X | 0.986328125      |
| NODE805X | NODE146X  | NODE717X  | 0.986328125      |
| NODE806X | GENE1669X | NODE307X  | 0.986328125      |
| NODE807X | NODE568X  | NODE318X  | 0.986328125      |
| NODE808X | GENE1249X | GENE2583X | 0.98626708984375 |
| NODE809X | NODE605X  | GENE2492X | 0.98626708984375 |
| NODE810X | NODE429X  | GENE1575X | 0.98626708984375 |
| NODE811X | GENE815X  | GENE814X  | 0.9862060546875  |
| NODE812X | GENE154X  | GENE978X  | 0.98614501953125 |
| NODE813X | GENE2242X | GENE547X  | 0.98614501953125 |
| NODE814X | GENE948X  | NODE363X  | 0.98614501953125 |
| NODE815X | GENE71X   | NODE42X   | 0.98614501953125 |
| NODE816X | NODE550X  | NODE81X   | 0.98614501953125 |
| NODE817X | GENE2049X | NODE378X  | 0.986083984375   |
| NODE818X | GENE466X  | GENE971X  | 0.98602294921875 |
| NODE819X | NODE221X  | GENE483X  | 0.98602294921875 |
| NODE820X | NODE432X  | NODE245X  | 0.98602294921875 |
| NODE821X | GENE505X  | GENE2561X | 0.9859619140625  |
| NODE822X | NODE206X  | GENE1122X | 0.9859619140625  |
| NODE823X | NODE346X  | NODE632X  | 0.9859619140625  |
| NODE824X | NODE559X  | GENE1503X | 0.9859619140625  |
| NODE825X | GENE1601X | GENE522X  | 0.98590087890625 |
| NODE826X | GENE1757X | GENE1138X | 0.98590087890625 |
| NODE827X | GENE515X  | GENE964X  | 0.98583984375    |
| NODE828X | GENE1046X | GENE944X  | 0.98583984375    |
| NODE829X | GENE2364X | GENE2385X | 0.98583984375    |
| NODE830X | GENE117X  | NODE542X  | 0.98577880859375 |
| NODE831X | NODE393X  | GENE1182X | 0.98577880859375 |
| NODE832X | GENE1386X | NODE132X  | 0.98577880859375 |
| NODE833X | GENE327X  | GENE2064X | 0.9857177734375  |
| NODE834X | GENE1091X | GENE704X  | 0.9857177734375  |
| NODE835X | GENE1294X | GENE705X  | 0.9857177734375  |
| NODE836X | GENE110X  | GENE1638X | 0.98565673828125 |
| NODE837X | GENE529X  | GENE1721X | 0.98565673828125 |
| NODE838X | GENE618X  | GENE533X  | 0.98565673828125 |
| NODE839X | GENE1934X | GENE1236X | 0.98565673828125 |
| NODE840X | GENE143X  | NODE356X  | 0.985595703125   |
| NODE841X | GENE632X  | GENE167X  | 0.985595703125   |
| NODE842X | GENE987X  | GENE206X  | 0.985595703125   |
| NODE843X | GENE2322X | GENE336X  | 0.985595703125   |
| NODE844X | GENE882X  | GENE578X  | 0.985595703125   |
| NODE845X | NODE524X  | NODE292X  | 0.985595703125   |
| NODE846X | NODE586X  | NODE360X  | 0.985595703125   |
| NODE847X | GENE2233X | GENE2229X | 0.98553466796875 |
| NODE848X | NODE642X  | NODE168X  | 0.98553466796875 |
| NODE849X | GENE974X  | GENE791X  | 0.9854736328125  |
| NODE850X | GENE1528X | GENE670X  | 0.98541259765625 |
| NODE851X | NODE234X  | GENE857X  | 0.98541259765625 |
| NODE852X | GENE2248X | GENE1127X | 0.98541259765625 |
| NODE853X | GENE1526X | GENE1372X | 0.98541259765625 |
| NODE854X | GENE2663X | GENE2410X | 0.98541259765625 |
| NODE855X | NODE494X  | NODE519X  | 0.98541259765625 |

|          |           |           |                  |
|----------|-----------|-----------|------------------|
| NODE856X | NODE116X  | NODE139X  | 0.9853515625     |
| NODE857X | NODE502X  | NODE300X  | 0.9853515625     |
| NODE858X | NODE344X  | GENE1197X | 0.9853515625     |
| NODE859X | GENE2137X | NODE672X  | 0.9853515625     |
| NODE860X | GENE1178X | GENE0X    | 0.98529052734375 |
| NODE861X | GENE1124X | NODE258X  | 0.98529052734375 |
| NODE862X | NODE587X  | NODE383X  | 0.98529052734375 |
| NODE863X | GENE1170X | NODE782X  | 0.98529052734375 |
| NODE864X | GENE311X  | GENE36X   | 0.9852294921875  |
| NODE865X | GENE351X  | NODE341X  | 0.9852294921875  |
| NODE866X | GENE961X  | GENE352X  | 0.98516845703125 |
| NODE867X | NODE384X  | GENE970X  | 0.98516845703125 |
| NODE868X | NODE445X  | NODE287X  | 0.985107421875   |
| NODE869X | NODE736X  | GENE864X  | 0.985107421875   |
| NODE870X | NODE248X  | NODE794X  | 0.985107421875   |
| NODE871X | GENE1856X | GENE1447X | 0.98504638671875 |
| NODE872X | GENE1644X | NODE520X  | 0.9849853515625  |
| NODE873X | GENE318X  | NODE421X  | 0.98492431640625 |
| NODE874X | GENE1298X | GENE1952X | 0.98492431640625 |
| NODE875X | GENE2651X | NODE88X   | 0.98492431640625 |
| NODE876X | GENE244X  | NODE492X  | 0.98492431640625 |
| NODE877X | GENE9X    | NODE285X  | 0.98486328125    |
| NODE878X | GENE225X  | GENE214X  | 0.98486328125    |
| NODE879X | GENE364X  | NODE484X  | 0.98480224609375 |
| NODE880X | GENE884X  | GENE1613X | 0.98480224609375 |
| NODE881X | NODE741X  | NODE553X  | 0.98480224609375 |
| NODE882X | NODE219X  | GENE811X  | 0.9847412109375  |
| NODE883X | NODE537X  | NODE468X  | 0.9847412109375  |
| NODE884X | GENE1042X | NODE389X  | 0.98468017578125 |
| NODE885X | NODE780X  | GENE854X  | 0.98468017578125 |
| NODE886X | NODE426X  | GENE472X  | 0.984619140625   |
| NODE887X | GENE926X  | GENE572X  | 0.98455810546875 |
| NODE888X | GENE1385X | GENE666X  | 0.98455810546875 |
| NODE889X | NODE433X  | GENE2631X | 0.98455810546875 |
| NODE890X | NODE482X  | NODE509X  | 0.98455810546875 |
| NODE891X | NODE577X  | GENE196X  | 0.98455810546875 |
| NODE892X | NODE209X  | GENE1025X | 0.9844970703125  |
| NODE893X | NODE205X  | NODE556X  | 0.9844970703125  |
| NODE894X | NODE507X  | NODE195X  | 0.98443603515625 |
| NODE895X | NODE430X  | NODE495X  | 0.98443603515625 |
| NODE896X | GENE14X   | GENE1708X | 0.984375         |
| NODE897X | GENE2449X | NODE785X  | 0.984375         |
| NODE898X | GENE2239X | GENE162X  | 0.98431396484375 |
| NODE899X | GENE1827X | GENE1829X | 0.98431396484375 |
| NODE900X | NODE390X  | NODE571X  | 0.98431396484375 |
| NODE901X | NODE674X  | NODE601X  | 0.98431396484375 |
| NODE902X | GENE2339X | GENE1977X | 0.9842529296875  |
| NODE903X | GENE1727X | NODE619X  | 0.98419189453125 |
| NODE904X | NODE722X  | NODE690X  | 0.98419189453125 |
| NODE905X | GENE2653X | GENE158X  | 0.984130859375   |
| NODE906X | GENE239X  | GENE2648X | 0.984130859375   |
| NODE907X | GENE366X  | GENE1101X | 0.984130859375   |
| NODE908X | GENE2408X | GENE1818X | 0.984130859375   |
| NODE909X | GENE606X  | GENE633X  | 0.98406982421875 |
| NODE910X | GENE657X  | GENE1480X | 0.98406982421875 |
| NODE911X | GENE2044X | NODE691X  | 0.98406982421875 |
| NODE912X | GENE2581X | NODE511X  | 0.98406982421875 |



|          |           |           |                  |
|----------|-----------|-----------|------------------|
| NODE913X | NODE407X  | GENE2504X | 0.98406982421875 |
| NODE914X | NODE411X  | NODE779X  | 0.98406982421875 |
| NODE915X | GENE116X  | GENE2396X | 0.9840087890625  |
| NODE916X | GENE1619X | NODE343X  | 0.9840087890625  |
| NODE917X | GENE2090X | GENE1469X | 0.98394775390625 |
| NODE918X | GENE2047X | GENE1633X | 0.98394775390625 |
| NODE919X | NODE364X  | NODE238X  | 0.98394775390625 |
| NODE920X | GENE22X   | GENE388X  | 0.98388671875    |
| NODE921X | GENE317X  | GENE714X  | 0.98388671875    |
| NODE922X | GENE2578X | GENE385X  | 0.98388671875    |
| NODE923X | NODE425X  | NODE689X  | 0.98388671875    |
| NODE924X | GENE2316X | NODE517X  | 0.98382568359375 |
| NODE925X | NODE437X  | GENE251X  | 0.9837646484375  |
| NODE926X | NODE349X  | GENE2506X | 0.9837646484375  |
| NODE927X | NODE310X  | GENE2260X | 0.9837646484375  |
| NODE928X | GENE1910X | GENE1495X | 0.98370361328125 |
| NODE929X | GENE1551X | NODE523X  | 0.98370361328125 |
| NODE930X | GENE1307X | GENE778X  | 0.983642578125   |
| NODE931X | GENE192X  | GENE323X  | 0.98358154296875 |
| NODE932X | NODE332X  | NODE368X  | 0.98358154296875 |
| NODE933X | NODE381X  | GENE2425X | 0.98358154296875 |
| NODE934X | NODE441X  | NODE454X  | 0.98358154296875 |
| NODE935X | GENE33X   | NODE444X  | 0.9835205078125  |
| NODE936X | GENE2405X | GENE367X  | 0.9835205078125  |
| NODE937X | GENE1016X | GENE646X  | 0.9835205078125  |
| NODE938X | GENE691X  | GENE1023X | 0.9835205078125  |
| NODE939X | GENE1597X | GENE2089X | 0.98345947265625 |
| NODE940X | NODE365X  | NODE197X  | 0.98345947265625 |
| NODE941X | NODE470X  | NODE241X  | 0.98345947265625 |
| NODE942X | GENE1621X | NODE906X  | 0.98345947265625 |
| NODE943X | GENE1148X | GENE18X   | 0.9833984375     |
| NODE944X | GENE392X  | GENE1080X | 0.9833984375     |
| NODE945X | NODE130X  | NODE506X  | 0.9833984375     |
| NODE946X | GENE69X   | GENE148X  | 0.98333740234375 |
| NODE947X | GENE2604X | GENE465X  | 0.98333740234375 |
| NODE948X | GENE2537X | GENE880X  | 0.98333740234375 |
| NODE949X | GENE983X  | GENE1481X | 0.98333740234375 |
| NODE950X | GENE2421X | GENE1541X | 0.98333740234375 |
| NODE951X | NODE752X  | NODE575X  | 0.98333740234375 |
| NODE952X | NODE373X  | GENE546X  | 0.9832763671875  |
| NODE953X | NODE518X  | GENE1452X | 0.9832763671875  |
| NODE954X | NODE703X  | GENE552X  | 0.9832763671875  |
| NODE955X | NODE841X  | GENE1001X | 0.9832763671875  |
| NODE956X | GENE101X  | GENE486X  | 0.98321533203125 |
| NODE957X | GENE224X  | GENE223X  | 0.98321533203125 |
| NODE958X | GENE1085X | GENE832X  | 0.98321533203125 |
| NODE959X | GENE2357X | GENE409X  | 0.983154296875   |
| NODE960X | GENE2522X | GENE1719X | 0.983154296875   |
| NODE961X | NODE522X  | NODE504X  | 0.983154296875   |
| NODE962X | GENE238X  | GENE875X  | 0.98309326171875 |
| NODE963X | GENE584X  | GENE2261X | 0.98309326171875 |
| NODE964X | NODE185X  | NODE809X  | 0.98309326171875 |
| NODE965X | NODE651X  | NODE284X  | 0.9830322265625  |
| NODE966X | NODE237X  | GENE68X   | 0.98297119140625 |
| NODE967X | GENE123X  | GENE823X  | 0.98297119140625 |
| NODE968X | GENE924X  | GENE414X  | 0.98297119140625 |
| NODE969X | GENE626X  | NODE276X  | 0.98297119140625 |

|           |           |           |                  |
|-----------|-----------|-----------|------------------|
| NODE970X  | NODE478X  | NODE350X  | 0.98297119140625 |
| NODE971X  | GENE1076X | GENE66X   | 0.98291015625    |
| NODE972X  | GENE2105X | GENE491X  | 0.98291015625    |
| NODE973X  | NODE412X  | NODE665X  | 0.98291015625    |
| NODE974X  | NODE547X  | NODE540X  | 0.98291015625    |
| NODE975X  | GENE500X  | GENE1819X | 0.98284912109375 |
| NODE976X  | GENE997X  | GENE2084X | 0.98284912109375 |
| NODE977X  | NODE348X  | NODE649X  | 0.98284912109375 |
| NODE978X  | NODE535X  | NODE705X  | 0.98284912109375 |
| NODE979X  | GENE655X  | NODE499X  | 0.9827880859375  |
| NODE980X  | GENE2015X | NODE282X  | 0.9827880859375  |
| NODE981X  | NODE176X  | NODE533X  | 0.9827880859375  |
| NODE982X  | NODE464X  | NODE604X  | 0.9827880859375  |
| NODE983X  | GENE506X  | NODE453X  | 0.98272705078125 |
| NODE984X  | GENE2019X | GENE1087X | 0.98272705078125 |
| NODE985X  | GENE2041X | NODE493X  | 0.98272705078125 |
| NODE986X  | GENE604X  | NODE377X  | 0.982666015625   |
| NODE987X  | NODE194X  | NODE663X  | 0.982666015625   |
| NODE988X  | GENE2440X | GENE2497X | 0.98260498046875 |
| NODE989X  | NODE781X  | NODE863X  | 0.98260498046875 |
| NODE990X  | GENE2439X | GENE1826X | 0.9825439453125  |
| NODE991X  | GENE164X  | GENE1546X | 0.98248291015625 |
| NODE992X  | GENE250X  | GENE401X  | 0.98248291015625 |
| NODE993X  | NODE684X  | GENE957X  | 0.98248291015625 |
| NODE994X  | NODE639X  | GENE2275X | 0.98248291015625 |
| NODE995X  | GENE2456X | NODE660X  | 0.982421875      |
| NODE996X  | GENE2599X | GENE614X  | 0.98236083984375 |
| NODE997X  | NODE543X  | NODE471X  | 0.98236083984375 |
| NODE998X  | NODE357X  | GENE1060X | 0.9822998046875  |
| NODE999X  | GENE2466X | GENE1490X | 0.9822998046875  |
| NODE1000X | GENE1989X | GENE1176X | 0.98223876953125 |
| NODE1001X | GENE2511X | NODE491X  | 0.98223876953125 |
| NODE1002X | GENE2124X | GENE354X  | 0.982177734375   |
| NODE1003X | NODE618X  | GENE1508X | 0.982177734375   |
| NODE1004X | GENE2636X | GENE1672X | 0.982177734375   |
| NODE1005X | NODE800X  | NODE904X  | 0.982177734375   |
| NODE1006X | GENE1847X | GENE17X   | 0.98211669921875 |
| NODE1007X | NODE546X  | NODE395X  | 0.98211669921875 |
| NODE1008X | NODE630X  | GENE1207X | 0.98211669921875 |
| NODE1009X | GENE1712X | NODE905X  | 0.98211669921875 |
| NODE1010X | GENE1581X | GENE176X  | 0.9820556640625  |
| NODE1011X | GENE2240X | GENE1726X | 0.98199462890625 |
| NODE1012X | NODE462X  | GENE1704X | 0.98199462890625 |
| NODE1013X | NODE761X  | GENE2132X | 0.98199462890625 |
| NODE1014X | GENE553X  | GENE844X  | 0.98193359375    |
| NODE1015X | GENE181X  | NODE815X  | 0.98193359375    |
| NODE1016X | GENE2617X | GENE765X  | 0.98187255859375 |
| NODE1017X | NODE362X  | GENE2407X | 0.98187255859375 |
| NODE1018X | GENE1277X | GENE2641X | 0.9818115234375  |
| NODE1019X | NODE358X  | NODE738X  | 0.9818115234375  |
| NODE1020X | GENE528X  | NODE711X  | 0.98175048828125 |
| NODE1021X | GENE2148X | GENE1072X | 0.98175048828125 |
| NODE1022X | NODE525X  | GENE1851X | 0.98175048828125 |
| NODE1023X | NODE530X  | NODE585X  | 0.98175048828125 |
| NODE1024X | NODE621X  | GENE2156X | 0.98175048828125 |
| NODE1025X | GENE2646X | GENE345X  | 0.981689453125   |
| NODE1026X | NODE709X  | NODE401X  | 0.981689453125   |

|           |           |           |                  |
|-----------|-----------|-----------|------------------|
| NODE1027X | GENE2554X | GENE1650X | 0.98162841796875 |
| NODE1028X | GENE2175X | GENE651X  | 0.9815673828125  |
| NODE1029X | NODE652X  | GENE1256X | 0.9815673828125  |
| NODE1030X | GENE1852X | GENE1153X | 0.98150634765625 |
| NODE1031X | GENE2462X | GENE1293X | 0.98150634765625 |
| NODE1032X | GENE2236X | GENE1343X | 0.9814453125     |
| NODE1033X | GENE917X  | GENE653X  | 0.98138427734375 |
| NODE1034X | GENE1686X | NODE789X  | 0.98138427734375 |
| NODE1035X | NODE683X  | GENE2372X | 0.98138427734375 |
| NODE1036X | GENE2226X | GENE1435X | 0.9813232421875  |
| NODE1037X | NODE599X  | NODE398X  | 0.9813232421875  |
| NODE1038X | GENE1192X | GENE2393X | 0.98126220703125 |
| NODE1039X | GENE1692X | NODE763X  | 0.981201171875   |
| NODE1040X | GENE147X  | GENE35X   | 0.98114013671875 |
| NODE1041X | GENE2022X | GENE246X  | 0.98114013671875 |
| NODE1042X | GENE1179X | GENE1201X | 0.98114013671875 |
| NODE1043X | GENE1544X | NODE455X  | 0.98114013671875 |
| NODE1044X | GENE2299X | NODE589X  | 0.98114013671875 |
| NODE1045X | NODE463X  | NODE225X  | 0.98114013671875 |
| NODE1046X | NODE768X  | GENE427X  | 0.98114013671875 |
| NODE1047X | GENE1096X | GENE2570X | 0.9810791015625  |
| NODE1048X | GENE2197X | GENE2264X | 0.98101806640625 |
| NODE1049X | NODE567X  | NODE728X  | 0.98101806640625 |
| NODE1050X | GENE958X  | NODE749X  | 0.98095703125    |
| NODE1051X | NODE645X  | NODE548X  | 0.98089599609375 |
| NODE1052X | GENE168X  | GENE1214X | 0.9808349609375  |
| NODE1053X | GENE1289X | GENE2494X | 0.9808349609375  |
| NODE1054X | NODE199X  | GENE341X  | 0.98077392578125 |
| NODE1055X | NODE359X  | GENE2232X | 0.98077392578125 |
| NODE1056X | GENE2238X | GENE2331X | 0.98077392578125 |
| NODE1057X | NODE819X  | NODE236X  | 0.98077392578125 |
| NODE1058X | NODE375X  | NODE560X  | 0.98077392578125 |
| NODE1059X | GENE322X  | GENE1189X | 0.980712890625   |
| NODE1060X | GENE2312X | GENE1269X | 0.980712890625   |
| NODE1061X | GENE57X   | NODE469X  | 0.98065185546875 |
| NODE1062X | GENE1378X | GENE261X  | 0.98065185546875 |
| NODE1063X | GENE557X  | NODE867X  | 0.9805908203125  |
| NODE1064X | GENE2145X | GENE2141X | 0.9805908203125  |
| NODE1065X | NODE857X  | NODE628X  | 0.9805908203125  |
| NODE1066X | GENE2292X | NODE954X  | 0.9805908203125  |
| NODE1067X | GENE405X  | GENE2505X | 0.98052978515625 |
| NODE1068X | GENE406X  | GENE1175X | 0.98052978515625 |
| NODE1069X | NODE488X  | GENE525X  | 0.98052978515625 |
| NODE1070X | NODE753X  | NODE483X  | 0.98052978515625 |
| NODE1071X | NODE868X  | NODE91X   | 0.98046875       |
| NODE1072X | NODE184X  | GENE2170X | 0.98040771484375 |
| NODE1073X | GENE1504X | GENE754X  | 0.9803466796875  |
| NODE1074X | GENE1320X | GENE1043X | 0.9803466796875  |
| NODE1075X | NODE109X  | NODE438X  | 0.9803466796875  |
| NODE1076X | NODE474X  | NODE541X  | 0.9803466796875  |
| NODE1077X | GENE56X   | NODE308X  | 0.98028564453125 |
| NODE1078X | GENE1132X | NODE239X  | 0.98028564453125 |
| NODE1079X | NODE889X  | NODE476X  | 0.98028564453125 |
| NODE1080X | GENE746X  | GENE2480X | 0.980224609375   |
| NODE1081X | GENE2212X | GENE750X  | 0.980224609375   |
| NODE1082X | GENE1942X | GENE49X   | 0.98016357421875 |
| NODE1083X | GENE2274X | NODE456X  | 0.98016357421875 |

|           |           |           |                  |
|-----------|-----------|-----------|------------------|
| NODE1084X | GENE794X  | GENE2237X | 0.9801025390625  |
| NODE1085X | GENE2009X | NODE252X  | 0.9801025390625  |
| NODE1086X | GENE763X  | NODE742X  | 0.98004150390625 |
| NODE1087X | NODE192X  | NODE911X  | 0.98004150390625 |
| NODE1088X | GENE434X  | GENE1736X | 0.97998046875    |
| NODE1089X | GENE2577X | GENE495X  | 0.97998046875    |
| NODE1090X | NODE496X  | GENE494X  | 0.97998046875    |
| NODE1091X | NODE916X  | NODE714X  | 0.97998046875    |
| NODE1092X | NODE733X  | NODE731X  | 0.97998046875    |
| NODE1093X | GENE1584X | NODE623X  | 0.97991943359375 |
| NODE1094X | GENE1099X | NODE754X  | 0.9798583984375  |
| NODE1095X | GENE221X  | GENE1933X | 0.97979736328125 |
| NODE1096X | GENE1632X | GENE703X  | 0.97979736328125 |
| NODE1097X | GENE806X  | NODE552X  | 0.97979736328125 |
| NODE1098X | NODE843X  | GENE1517X | 0.97979736328125 |
| NODE1099X | GENE737X  | GENE2259X | 0.979736328125   |
| NODE1100X | GENE2433X | GENE1766X | 0.979736328125   |
| NODE1101X | NODE337X  | NODE569X  | 0.979736328125   |
| NODE1102X | NODE485X  | NODE787X  | 0.979736328125   |
| NODE1103X | GENE2596X | NODE1045X | 0.979736328125   |
| NODE1104X | GENE2224X | GENE1709X | 0.97967529296875 |
| NODE1105X | GENE307X  | GENE450X  | 0.9796142578125  |
| NODE1106X | NODE726X  | GENE1918X | 0.9796142578125  |
| NODE1107X | NODE330X  | NODE562X  | 0.9796142578125  |
| NODE1108X | GENE2571X | GENE1782X | 0.97955322265625 |
| NODE1109X | NODE408X  | NODE836X  | 0.97955322265625 |
| NODE1110X | GENE2058X | GENE1032X | 0.9794921875     |
| NODE1111X | NODE616X  | GENE1315X | 0.9794921875     |
| NODE1112X | NODE534X  | NODE420X  | 0.9794921875     |
| NODE1113X | GENE437X  | NODE419X  | 0.97943115234375 |
| NODE1114X | GENE1299X | NODE713X  | 0.97943115234375 |
| NODE1115X | NODE514X  | NODE710X  | 0.9793701171875  |
| NODE1116X | NODE617X  | NODE750X  | 0.979248046875   |
| NODE1117X | NODE791X  | NODE641X  | 0.9791259765625  |
| NODE1118X | GENE1867X | NODE704X  | 0.9791259765625  |
| NODE1119X | NODE847X  | GENE219X  | 0.9791259765625  |
| NODE1120X | GENE285X  | NODE583X  | 0.97906494140625 |
| NODE1121X | GENE992X  | GENE820X  | 0.97906494140625 |
| NODE1122X | GENE2112X | NODE539X  | 0.97906494140625 |
| NODE1123X | NODE686X  | NODE766X  | 0.97906494140625 |
| NODE1124X | NODE1051X | NODE767X  | 0.97906494140625 |
| NODE1125X | GENE2516X | GENE913X  | 0.97900390625    |
| NODE1126X | GENE1625X | GENE1902X | 0.97900390625    |
| NODE1127X | NODE1085X | NODE503X  | 0.97900390625    |
| NODE1128X | NODE538X  | NODE719X  | 0.97894287109375 |
| NODE1129X | NODE516X  | NODE945X  | 0.97894287109375 |
| NODE1130X | NODE977X  | NODE900X  | 0.97894287109375 |
| NODE1131X | GENE1540X | GENE1539X | 0.9788818359375  |
| NODE1132X | NODE807X  | NODE489X  | 0.9788818359375  |
| NODE1133X | NODE808X  | NODE661X  | 0.978759765625   |
| NODE1134X | NODE232X  | GENE1645X | 0.97869873046875 |
| NODE1135X | NODE697X  | NODE500X  | 0.97869873046875 |
| NODE1136X | NODE656X  | NODE894X  | 0.97869873046875 |
| NODE1137X | NODE886X  | NODE702X  | 0.9786376953125  |
| NODE1138X | GENE1725X | NODE403X  | 0.978515625      |
| NODE1139X | GENE1892X | GENE2144X | 0.97845458984375 |
| NODE1140X | NODE402X  | NODE898X  | 0.97845458984375 |

|           |           |           |                  |
|-----------|-----------|-----------|------------------|
| NODE1141X | NODE551X  | NODE682X  | 0.97845458984375 |
| NODE1142X | NODE595X  | GENE2356X | 0.97845458984375 |
| NODE1143X | GENE1590X | GENE793X  | 0.9783935546875  |
| NODE1144X | NODE596X  | NODE490X  | 0.9783935546875  |
| NODE1145X | GENE1156X | GENE2097X | 0.978271484375   |
| NODE1146X | GENE2302X | GENE2594X | 0.978271484375   |
| NODE1147X | NODE458X  | NODE650X  | 0.978271484375   |
| NODE1148X | GENE861X  | GENE640X  | 0.9781494140625  |
| NODE1149X | NODE637X  | NODE340X  | 0.9781494140625  |
| NODE1150X | GENE2377X | NODE788X  | 0.97808837890625 |
| NODE1151X | GENE469X  | GENE217X  | 0.97802734375    |
| NODE1152X | GENE925X  | GENE1994X | 0.97802734375    |
| NODE1153X | GENE2296X | NODE329X  | 0.97802734375    |
| NODE1154X | GENE742X  | NODE822X  | 0.97796630859375 |
| NODE1155X | GENE2113X | GENE1054X | 0.97796630859375 |
| NODE1156X | GENE213X  | GENE2513X | 0.9779052734375  |
| NODE1157X | NODE666X  | GENE724X  | 0.9779052734375  |
| NODE1158X | GENE2177X | GENE828X  | 0.9779052734375  |
| NODE1159X | GENE2662X | GENE1652X | 0.9779052734375  |
| NODE1160X | GENE2149X | GENE2201X | 0.9779052734375  |
| NODE1161X | GENE108X  | GENE2666X | 0.97784423828125 |
| NODE1162X | GENE435X  | NODE443X  | 0.97784423828125 |
| NODE1163X | GENE2250X | GENE496X  | 0.97784423828125 |
| NODE1164X | GENE2262X | GENE676X  | 0.977783203125   |
| NODE1165X | GENE2419X | NODE748X  | 0.977783203125   |
| NODE1166X | NODE1102X | NODE662X  | 0.977783203125   |
| NODE1167X | GENE1217X | GENE1744X | 0.97772216796875 |
| NODE1168X | NODE871X  | NODE409X  | 0.97772216796875 |
| NODE1169X | NODE737X  | GENE23X   | 0.9776611328125  |
| NODE1170X | GENE1868X | GENE509X  | 0.97760009765625 |
| NODE1171X | GENE807X  | NODE418X  | 0.97760009765625 |
| NODE1172X | GENE1188X | GENE1413X | 0.97760009765625 |
| NODE1173X | NODE354X  | NODE948X  | 0.97760009765625 |
| NODE1174X | NODE434X  | NODE891X  | 0.97760009765625 |
| NODE1175X | GENE1924X | NODE627X  | 0.9775390625     |
| NODE1176X | GENE2574X | GENE2376X | 0.9775390625     |
| NODE1177X | NODE959X  | GENE243X  | 0.97747802734375 |
| NODE1178X | NODE1024X | GENE549X  | 0.97747802734375 |
| NODE1179X | GENE662X  | GENE1130X | 0.97747802734375 |
| NODE1180X | NODE1073X | GENE1573X | 0.9774169921875  |
| NODE1181X | NODE392X  | GENE2306X | 0.9774169921875  |
| NODE1182X | NODE720X  | NODE465X  | 0.9774169921875  |
| NODE1183X | NODE579X  | NODE939X  | 0.9774169921875  |
| NODE1184X | GENE910X  | NODE862X  | 0.97735595703125 |
| NODE1185X | NODE581X  | NODE498X  | 0.97735595703125 |
| NODE1186X | NODE1075X | NODE410X  | 0.97735595703125 |
| NODE1187X | GENE355X  | NODE804X  | 0.977294921875   |
| NODE1188X | GENE1212X | GENE369X  | 0.977294921875   |
| NODE1189X | GENE378X  | GENE1443X | 0.977294921875   |
| NODE1190X | GENE2125X | GENE1312X | 0.977294921875   |
| NODE1191X | NODE477X  | NODE743X  | 0.977294921875   |
| NODE1192X | GENE1678X | NODE597X  | 0.97723388671875 |
| NODE1193X | GENE1627X | GENE2544X | 0.9771728515625  |
| NODE1194X | NODE707X  | NODE404X  | 0.9771728515625  |
| NODE1195X | GENE106X  | GENE2340X | 0.97711181640625 |
| NODE1196X | GENE2394X | GENE2545X | 0.97711181640625 |
| NODE1197X | GENE260X  | GENE245X  | 0.97705078125    |

|           |           |           |                  |
|-----------|-----------|-----------|------------------|
| NODE1198X | GENE949X  | GENE1131X | 0.97698974609375 |
| NODE1199X | NODE673X  | NODE644X  | 0.97698974609375 |
| NODE1200X | GENE115X  | NODE896X  | 0.9769287109375  |
| NODE1201X | NODE932X  | NODE450X  | 0.9769287109375  |
| NODE1202X | NODE859X  | NODE694X  | 0.97686767578125 |
| NODE1203X | GENE2360X | GENE259X  | 0.976806640625   |
| NODE1204X | NODE376X  | NODE798X  | 0.97674560546875 |
| NODE1205X | NODE934X  | NODE786X  | 0.97674560546875 |
| NODE1206X | GENE2140X | GENE113X  | 0.9766845703125  |
| NODE1207X | GENE1125X | GENE503X  | 0.97662353515625 |
| NODE1208X | GENE2519X | GENE1631X | 0.9765625        |
| NODE1209X | GENE2547X | GENE1748X | 0.9765625        |
| NODE1210X | NODE860X  | NODE681X  | 0.9765625        |
| NODE1211X | GENE2503X | GENE201X  | 0.97650146484375 |
| NODE1212X | NODE235X  | NODE667X  | 0.97650146484375 |
| NODE1213X | NODE294X  | NODE367X  | 0.97650146484375 |
| NODE1214X | NODE675X  | GENE1360X | 0.97650146484375 |
| NODE1215X | GENE1031X | GENE2123X | 0.9764404296875  |
| NODE1216X | NODE795X  | GENE302X  | 0.9764404296875  |
| NODE1217X | GENE612X  | GENE2287X | 0.976318359375   |
| NODE1218X | GENE2017X | GENE1759X | 0.976318359375   |
| NODE1219X | NODE944X  | GENE343X  | 0.97625732421875 |
| NODE1220X | GENE1498X | GENE821X  | 0.97625732421875 |
| NODE1221X | NODE635X  | NODE846X  | 0.97625732421875 |
| NODE1222X | NODE823X  | NODE923X  | 0.9761962890625  |
| NODE1223X | GENE1069X | NODE833X  | 0.9761962890625  |
| NODE1224X | GENE959X  | GENE2644X | 0.97613525390625 |
| NODE1225X | NODE352X  | GENE1027X | 0.97613525390625 |
| NODE1226X | GENE1932X | GENE1738X | 0.97613525390625 |
| NODE1227X | NODE257X  | NODE1113X | 0.97607421875    |
| NODE1228X | NODE922X  | GENE1221X | 0.97589111328125 |
| NODE1229X | NODE316X  | NODE1144X | 0.97589111328125 |
| NODE1230X | NODE875X  | GENE1110X | 0.97576904296875 |
| NODE1231X | GENE1955X | GENE1133X | 0.97576904296875 |
| NODE1232X | GENE2575X | GENE1135X | 0.97576904296875 |
| NODE1233X | GENE2119X | GENE104X  | 0.9757080078125  |
| NODE1234X | NODE1015X | GENE866X  | 0.9757080078125  |
| NODE1235X | GENE1609X | GENE2551X | 0.9757080078125  |
| NODE1236X | GENE266X  | NODE958X  | 0.9757080078125  |
| NODE1237X | GENE413X  | GENE2286X | 0.9755859375     |
| NODE1238X | NODE629X  | NODE915X  | 0.97552490234375 |
| NODE1239X | GENE744X  | GENE499X  | 0.9754638671875  |
| NODE1240X | GENE2406X | GENE1997X | 0.9754638671875  |
| NODE1241X | GENE2085X | NODE921X  | 0.9754638671875  |
| NODE1242X | NODE1046X | NODE405X  | 0.97540283203125 |
| NODE1243X | GENE2164X | NODE246X  | 0.97528076171875 |
| NODE1244X | NODE677X  | NODE1149X | 0.97528076171875 |
| NODE1245X | NODE268X  | GENE492X  | 0.9752197265625  |
| NODE1246X | GENE2392X | GENE1457X | 0.9752197265625  |
| NODE1247X | NODE626X  | NODE114X  | 0.9752197265625  |
| NODE1248X | GENE1274X | NODE647X  | 0.97515869140625 |
| NODE1249X | NODE813X  | NODE757X  | 0.97515869140625 |
| NODE1250X | NODE387X  | NODE801X  | 0.97509765625    |
| NODE1251X | NODE991X  | NODE1108X | 0.97509765625    |
| NODE1252X | GENE455X  | GENE940X  | 0.97503662109375 |
| NODE1253X | GENE1821X | GENE2573X | 0.97503662109375 |
| NODE1254X | NODE730X  | GENE284X  | 0.97503662109375 |

|           |           |           |                  |
|-----------|-----------|-----------|------------------|
| NODE1255X | NODE1204X | NODE771X  | 0.97503662109375 |
| NODE1256X | GENE420X  | NODE640X  | 0.9749755859375  |
| NODE1257X | GENE1247X | GENE852X  | 0.9749755859375  |
| NODE1258X | GENE1150X | NODE1022X | 0.97491455078125 |
| NODE1259X | NODE1092X | NODE580X  | 0.97491455078125 |
| NODE1260X | GENE309X  | NODE1153X | 0.97491455078125 |
| NODE1261X | NODE608X  | NODE712X  | 0.974853515625   |
| NODE1262X | GENE1961X | GENE627X  | 0.97479248046875 |
| NODE1263X | GENE2308X | GENE1834X | 0.97479248046875 |
| NODE1264X | GENE620X  | NODE370X  | 0.9747314453125  |
| NODE1265X | NODE598X  | GENE1931X | 0.97467041015625 |
| NODE1266X | NODE735X  | GENE892X  | 0.974609375      |
| NODE1267X | NODE448X  | GENE989X  | 0.974609375      |
| NODE1268X | NODE557X  | GENE2146X | 0.974609375      |
| NODE1269X | NODE631X  | GENE677X  | 0.974609375      |
| NODE1270X | NODE603X  | GENE278X  | 0.97454833984375 |
| NODE1271X | GENE459X  | GENE1982X | 0.97454833984375 |
| NODE1272X | NODE895X  | NODE701X  | 0.97454833984375 |
| NODE1273X | GENE1823X | GENE2678X | 0.9744873046875  |
| NODE1274X | GENE79X   | GENE2640X | 0.97442626953125 |
| NODE1275X | GENE1015X | NODE950X  | 0.97442626953125 |
| NODE1276X | GENE1356X | GENE1283X | 0.97442626953125 |
| NODE1277X | GENE1579X | NODE756X  | 0.97442626953125 |
| NODE1278X | GENE1491X | GENE1048X | 0.974365234375   |
| NODE1279X | GENE1697X | GENE2270X | 0.974365234375   |
| NODE1280X | NODE636X  | NODE475X  | 0.974365234375   |
| NODE1281X | NODE554X  | NODE695X  | 0.97430419921875 |
| NODE1282X | NODE820X  | NODE561X  | 0.97430419921875 |
| NODE1283X | GENE1751X | NODE513X  | 0.97418212890625 |
| NODE1284X | GENE417X  | NODE643X  | 0.97412109375    |
| NODE1285X | GENE2181X | NODE839X  | 0.97412109375    |
| NODE1286X | NODE1185X | NODE834X  | 0.97412109375    |
| NODE1287X | NODE1003X | NODE890X  | 0.97412109375    |
| NODE1288X | GENE1927X | NODE1111X | 0.97412109375    |
| NODE1289X | NODE1103X | GENE380X  | 0.97406005859375 |
| NODE1290X | NODE872X  | GENE1225X | 0.97406005859375 |
| NODE1291X | GENE2061X | GENE1786X | 0.97406005859375 |
| NODE1292X | NODE721X  | NODE978X  | 0.97406005859375 |
| NODE1293X | GENE977X  | GENE2154X | 0.9739990234375  |
| NODE1294X | GENE312X  | GENE883X  | 0.97393798828125 |
| NODE1295X | NODE838X  | GENE304X  | 0.973876953125   |
| NODE1296X | GENE2477X | NODE882X  | 0.973876953125   |
| NODE1297X | GENE524X  | NODE1209X | 0.97381591796875 |
| NODE1298X | GENE1103X | GENE2628X | 0.97381591796875 |
| NODE1299X | NODE883X  | NODE606X  | 0.9737548828125  |
| NODE1300X | NODE633X  | NODE1019X | 0.9737548828125  |
| NODE1301X | GENE2059X | GENE836X  | 0.97369384765625 |
| NODE1302X | GENE639X  | NODE594X  | 0.9736328125     |
| NODE1303X | NODE620X  | NODE1034X | 0.9736328125     |
| NODE1304X | GENE930X  | NODE851X  | 0.97357177734375 |
| NODE1305X | NODE772X  | NODE442X  | 0.9735107421875  |
| NODE1306X | GENE1267X | NODE775X  | 0.9735107421875  |
| NODE1307X | GENE563X  | GENE1985X | 0.97344970703125 |
| NODE1308X | GENE1439X | GENE46X   | 0.973388671875   |
| NODE1309X | NODE938X  | GENE286X  | 0.97332763671875 |
| NODE1310X | GENE10X   | GENE1808X | 0.9732666015625  |
| NODE1311X | GENE436X  | GENE1206X | 0.97320556640625 |

|           |           |           |                  |
|-----------|-----------|-----------|------------------|
| NODE1312X | NODE142X  | GENE1680X | 0.97320556640625 |
| NODE1313X | GENE565X  | GENE966X  | 0.97308349609375 |
| NODE1314X | GENE1067X | NODE824X  | 0.9730224609375  |
| NODE1315X | GENE1589X | GENE1820X | 0.9730224609375  |
| NODE1316X | GENE1768X | NODE796X  | 0.9730224609375  |
| NODE1317X | NODE840X  | NODE452X  | 0.9730224609375  |
| NODE1318X | NODE369X  | NODE919X  | 0.97296142578125 |
| NODE1319X | NODE406X  | GENE831X  | 0.972900390625   |
| NODE1320X | NODE947X  | GENE30X   | 0.972900390625   |
| NODE1321X | GENE1084X | GENE1219X | 0.97283935546875 |
| NODE1322X | NODE724X  | NODE877X  | 0.9727783203125  |
| NODE1323X | NODE941X  | NODE873X  | 0.9727783203125  |
| NODE1324X | GENE876X  | GENE1885X | 0.97271728515625 |
| NODE1325X | GENE210X  | GENE1157X | 0.97265625       |
| NODE1326X | GENE1740X | GENE1068X | 0.97259521484375 |
| NODE1327X | NODE1154X | NODE622X  | 0.97259521484375 |
| NODE1328X | GENE2173X | NODE852X  | 0.9725341796875  |
| NODE1329X | NODE729X  | NODE555X  | 0.97247314453125 |
| NODE1330X | NODE931X  | NODE565X  | 0.97247314453125 |
| NODE1331X | GENE950X  | GENE577X  | 0.97235107421875 |
| NODE1332X | NODE706X  | NODE1124X | 0.97235107421875 |
| NODE1333X | GENE2655X | GENE1983X | 0.9722900390625  |
| NODE1334X | GENE575X  | GENE695X  | 0.97222900390625 |
| NODE1335X | NODE864X  | GENE2441X | 0.97222900390625 |
| NODE1336X | NODE853X  | GENE2553X | 0.97222900390625 |
| NODE1337X | NODE646X  | NODE964X  | 0.97222900390625 |
| NODE1338X | GENE2478X | NODE545X  | 0.97210693359375 |
| NODE1339X | GENE480X  | GENE1365X | 0.9720458984375  |
| NODE1340X | GENE161X  | NODE1029X | 0.9720458984375  |
| NODE1341X | GENE2639X | GENE1187X | 0.97198486328125 |
| NODE1342X | GENE1374X | GENE1210X | 0.97198486328125 |
| NODE1343X | GENE1716X | GENE2580X | 0.97198486328125 |
| NODE1344X | GENE2002X | GENE1163X | 0.971923828125   |
| NODE1345X | GENE1186X | GENE1468X | 0.971923828125   |
| NODE1346X | NODE273X  | GENE1956X | 0.9718017578125  |
| NODE1347X | NODE1080X | GENE772X  | 0.9718017578125  |
| NODE1348X | NODE1065X | NODE901X  | 0.9716796875     |
| NODE1349X | GENE2603X | GENE1286X | 0.9715576171875  |
| NODE1350X | NODE881X  | NODE805X  | 0.9715576171875  |
| NODE1351X | NODE1287X | NODE1005X | 0.9715576171875  |
| NODE1352X | GENE1466X | NODE1191X | 0.971435546875   |
| NODE1353X | GENE159X  | GENE1812X | 0.97137451171875 |
| NODE1354X | GENE228X  | GENE2619X | 0.97137451171875 |
| NODE1355X | GENE2579X | GENE433X  | 0.97137451171875 |
| NODE1356X | NODE1048X | NODE573X  | 0.97137451171875 |
| NODE1357X | NODE783X  | NODE770X  | 0.97137451171875 |
| NODE1358X | GENE619X  | GENE91X   | 0.9713134765625  |
| NODE1359X | GENE1802X | GENE387X  | 0.9713134765625  |
| NODE1360X | NODE1030X | GENE451X  | 0.9713134765625  |
| NODE1361X | NODE658X  | NODE739X  | 0.9713134765625  |
| NODE1362X | NODE1116X | NODE792X  | 0.9713134765625  |
| NODE1363X | GENE2403X | GENE1519X | 0.97125244140625 |
| NODE1364X | GENE255X  | NODE249X  | 0.97113037109375 |
| NODE1365X | GENE463X  | GENE1388X | 0.97113037109375 |
| NODE1366X | GENE537X  | NODE198X  | 0.97100830078125 |
| NODE1367X | NODE1121X | GENE943X  | 0.97100830078125 |
| NODE1368X | NODE963X  | GENE800X  | 0.970947265625   |



|           |           |           |                  |
|-----------|-----------|-----------|------------------|
| NODE1369X | GENE982X  | GENE178X  | 0.97088623046875 |
| NODE1370X | GENE195X  | GENE1796X | 0.9708251953125  |
| NODE1371X | GENE2215X | GENE1430X | 0.97076416015625 |
| NODE1372X | NODE693X  | NODE1031X | 0.970703125      |
| NODE1373X | NODE825X  | NODE758X  | 0.970703125      |
| NODE1374X | NODE986X  | GENE650X  | 0.97064208984375 |
| NODE1375X | NODE1061X | NODE848X  | 0.97064208984375 |
| NODE1376X | GENE897X  | NODE676X  | 0.9705810546875  |
| NODE1377X | GENE1041X | GENE1155X | 0.9705810546875  |
| NODE1378X | GENE845X  | NODE760X  | 0.9705810546875  |
| NODE1379X | GENE300X  | GENE1383X | 0.97052001953125 |
| NODE1380X | GENE935X  | GENE1836X | 0.97052001953125 |
| NODE1381X | NODE609X  | NODE1008X | 0.97052001953125 |
| NODE1382X | NODE612X  | NODE953X  | 0.970458984375   |
| NODE1383X | NODE670X  | NODE1017X | 0.970458984375   |
| NODE1384X | GENE1986X | GENE1586X | 0.97039794921875 |
| NODE1385X | GENE2106X | GENE295X  | 0.9703369140625  |
| NODE1386X | GENE411X  | NODE657X  | 0.97027587890625 |
| NODE1387X | GENE1331X | GENE2593X | 0.97027587890625 |
| NODE1388X | GENE2543X | GENE1516X | 0.97027587890625 |
| NODE1389X | NODE865X  | NODE1070X | 0.97027587890625 |
| NODE1390X | NODE987X  | NODE1135X | 0.97021484375    |
| NODE1391X | NODE751X  | GENE2515X | 0.97015380859375 |
| NODE1392X | GENE885X  | NODE821X  | 0.9700927734375  |
| NODE1393X | GENE2332X | NODE774X  | 0.97003173828125 |
| NODE1394X | GENE1199X | GENE826X  | 0.969970703125   |
| NODE1395X | NODE1082X | GENE2427X | 0.969970703125   |
| NODE1396X | NODE929X  | NODE769X  | 0.96990966796875 |
| NODE1397X | GENE2479X | NODE521X  | 0.9698486328125  |
| NODE1398X | GENE960X  | NODE967X  | 0.9698486328125  |
| NODE1399X | GENE61X   | GENE379X  | 0.96966552734375 |
| NODE1400X | GENE2352X | GENE1259X | 0.96966552734375 |
| NODE1401X | NODE924X  | NODE1078X | 0.96966552734375 |
| NODE1402X | GENE2365X | GENE1622X | 0.96942138671875 |
| NODE1403X | GENE1079X | GENE2184X | 0.9693603515625  |
| NODE1404X | GENE2447X | NODE291X  | 0.9693603515625  |
| NODE1405X | NODE1122X | NODE928X  | 0.9693603515625  |
| NODE1406X | GENE460X  | NODE718X  | 0.96929931640625 |
| NODE1407X | NODE669X  | GENE2190X | 0.96929931640625 |
| NODE1408X | GENE2584X | NODE984X  | 0.96929931640625 |
| NODE1409X | GENE2455X | GENE373X  | 0.96923828125    |
| NODE1410X | GENE1369X | GENE1643X | 0.96923828125    |
| NODE1411X | NODE1099X | NODE634X  | 0.96917724609375 |
| NODE1412X | NODE708X  | NODE764X  | 0.96917724609375 |
| NODE1413X | GENE175X  | GENE2343X | 0.9691162109375  |
| NODE1414X | NODE972X  | GENE2004X | 0.9691162109375  |
| NODE1415X | NODE1012X | NODE1027X | 0.96893310546875 |
| NODE1416X | NODE1141X | NODE1023X | 0.96893310546875 |
| NODE1417X | GENE867X  | GENE812X  | 0.96881103515625 |
| NODE1418X | NODE981X  | NODE1225X | 0.96881103515625 |
| NODE1419X | GENE1685X | GENE151X  | 0.96868896484375 |
| NODE1420X | GENE668X  | NODE1280X | 0.96868896484375 |
| NODE1421X | GENE2592X | NODE927X  | 0.96868896484375 |
| NODE1422X | NODE582X  | NODE563X  | 0.96868896484375 |
| NODE1423X | GENE526X  | NODE995X  | 0.9686279296875  |
| NODE1424X | NODE802X  | GENE995X  | 0.9686279296875  |
| NODE1425X | GENE190X  | GENE649X  | 0.968505859375   |

|           |           |           |                  |
|-----------|-----------|-----------|------------------|
| NODE1426X | NODE1170X | GENE2254X | 0.96844482421875 |
| NODE1427X | NODE773X  | NODE1010X | 0.96844482421875 |
| NODE1428X | NODE784X  | NODE793X  | 0.96844482421875 |
| NODE1429X | NODE1090X | GENE1306X | 0.9683837890625  |
| NODE1430X | NODE861X  | NODE926X  | 0.9683837890625  |
| NODE1431X | GENE905X  | GENE2198X | 0.96826171875    |
| NODE1432X | NODE974X  | NODE1332X | 0.96826171875    |
| NODE1433X | GENE1417X | GENE743X  | 0.9681396484375  |
| NODE1434X | GENE1515X | GENE1774X | 0.968017578125   |
| NODE1435X | NODE487X  | NODE1067X | 0.96795654296875 |
| NODE1436X | NODE996X  | NODE992X  | 0.9678955078125  |
| NODE1437X | GENE2460X | GENE921X  | 0.96783447265625 |
| NODE1438X | NODE1168X | NODE512X  | 0.96783447265625 |
| NODE1439X | NODE955X  | NODE870X  | 0.96783447265625 |
| NODE1440X | GENE442X  | NODE799X  | 0.9677734375     |
| NODE1441X | GENE1506X | GENE2167X | 0.9676513671875  |
| NODE1442X | NODE654X  | GENE673X  | 0.96746826171875 |
| NODE1443X | GENE702X  | GENE2616X | 0.96746826171875 |
| NODE1444X | NODE1011X | GENE1666X | 0.96746826171875 |
| NODE1445X | NODE614X  | NODE1337X | 0.96734619140625 |
| NODE1446X | NODE1212X | NODE876X  | 0.96734619140625 |
| NODE1447X | NODE973X  | NODE1249X | 0.96734619140625 |
| NODE1448X | NODE1328X | NODE880X  | 0.96734619140625 |
| NODE1449X | NODE831X  | GENE1056X | 0.96728515625    |
| NODE1450X | NODE909X  | GENE1623X | 0.96728515625    |
| NODE1451X | GENE2566X | NODE1188X | 0.96728515625    |
| NODE1452X | NODE1344X | GENE2336X | 0.96728515625    |
| NODE1453X | NODE1083X | NODE578X  | 0.96722412109375 |
| NODE1454X | NODE655X  | GENE991X  | 0.96722412109375 |
| NODE1455X | NODE744X  | NODE1325X | 0.96722412109375 |
| NODE1456X | GENE1549X | GENE841X  | 0.9671630859375  |
| NODE1457X | NODE1044X | NODE1069X | 0.9671630859375  |
| NODE1458X | GENE686X  | GENE2632X | 0.96710205078125 |
| NODE1459X | GENE271X  | GENE193X  | 0.967041015625   |
| NODE1460X | NODE776X  | NODE1148X | 0.967041015625   |
| NODE1461X | GENE1470X | GENE856X  | 0.96697998046875 |
| NODE1462X | NODE933X  | GENE877X  | 0.96685791015625 |
| NODE1463X | GENE365X  | GENE1235X | 0.96673583984375 |
| NODE1464X | NODE1316X | NODE1136X | 0.96673583984375 |
| NODE1465X | GENE1859X | NODE1021X | 0.9666748046875  |
| NODE1466X | GENE155X  | GENE1038X | 0.966552734375   |
| NODE1467X | GENE2099X | GENE1040X | 0.966552734375   |
| NODE1468X | GENE590X  | NODE845X  | 0.96649169921875 |
| NODE1469X | GENE1406X | GENE1313X | 0.96649169921875 |
| NODE1470X | NODE858X  | NODE1203X | 0.9664306640625  |
| NODE1471X | GENE2539X | GENE798X  | 0.96636962890625 |
| NODE1472X | NODE740X  | GENE301X  | 0.96630859375    |
| NODE1473X | NODE1095X | NODE759X  | 0.96624755859375 |
| NODE1474X | NODE1250X | NODE664X  | 0.9661865234375  |
| NODE1475X | NODE1422X | NODE1072X | 0.9661865234375  |
| NODE1476X | NODE1322X | NODE1157X | 0.9661865234375  |
| NODE1477X | GENE1174X | GENE2251X | 0.96600341796875 |
| NODE1478X | GENE2438X | NODE1217X | 0.96600341796875 |
| NODE1479X | NODE1107X | NODE1255X | 0.96600341796875 |
| NODE1480X | GENE1647X | GENE2348X | 0.96588134765625 |
| NODE1481X | NODE1336X | NODE952X  | 0.9658203125     |
| NODE1482X | NODE281X  | NODE1112X | 0.9656982421875  |

|           |           |           |                  |
|-----------|-----------|-----------|------------------|
| NODE1483X | NODE814X  | NODE893X  | 0.9656982421875  |
| NODE1484X | NODE1013X | NODE1247X | 0.96563720703125 |
| NODE1485X | GENE803X  | NODE566X  | 0.965576171875   |
| NODE1486X | GENE1970X | NODE1365X | 0.965576171875   |
| NODE1487X | GENE2077X | GENE2418X | 0.9654541015625  |
| NODE1488X | NODE1009X | GENE229X  | 0.96539306640625 |
| NODE1489X | NODE1035X | GENE721X  | 0.96539306640625 |
| NODE1490X | GENE2265X | GENE972X  | 0.96539306640625 |
| NODE1491X | GENE2369X | NODE422X  | 0.96539306640625 |
| NODE1492X | NODE1427X | NODE696X  | 0.96539306640625 |
| NODE1493X | GENE107X  | GENE1297X | 0.96533203125    |
| NODE1494X | NODE879X  | NODE778X  | 0.96533203125    |
| NODE1495X | NODE887X  | NODE1050X | 0.96533203125    |
| NODE1496X | NODE1276X | NODE638X  | 0.96527099609375 |
| NODE1497X | NODE817X  | NODE925X  | 0.96527099609375 |
| NODE1498X | GENE1380X | GENE985X  | 0.9652099609375  |
| NODE1499X | NODE1192X | NODE914X  | 0.96514892578125 |
| NODE1500X | NODE1047X | NODE1264X | 0.965087890625   |
| NODE1501X | GENE658X  | GENE2200X | 0.96502685546875 |
| NODE1502X | NODE715X  | GENE2368X | 0.96502685546875 |
| NODE1503X | NODE414X  | NODE1270X | 0.96502685546875 |
| NODE1504X | NODE1037X | NODE940X  | 0.96502685546875 |
| NODE1505X | NODE842X  | NODE855X  | 0.9649658203125  |
| NODE1506X | GENE1592X | NODE1178X | 0.96490478515625 |
| NODE1507X | NODE826X  | NODE874X  | 0.96478271484375 |
| NODE1508X | GENE1357X | GENE2206X | 0.9647216796875  |
| NODE1509X | NODE1189X | NODE903X  | 0.9647216796875  |
| NODE1510X | NODE1064X | GENE109X  | 0.96453857421875 |
| NODE1511X | NODE961X  | NODE1282X | 0.96453857421875 |
| NODE1512X | GENE2012X | NODE1104X | 0.96453857421875 |
| NODE1513X | GENE1730X | GENE740X  | 0.9644775390625  |
| NODE1514X | GENE906X  | GENE2446X | 0.9644775390625  |
| NODE1515X | NODE1076X | NODE1330X | 0.9644775390625  |
| NODE1516X | GENE786X  | NODE1195X | 0.96435546875    |
| NODE1517X | NODE1304X | GENE1771X | 0.96435546875    |
| NODE1518X | NODE1006X | NODE1274X | 0.96435546875    |
| NODE1519X | GENE2397X | NODE1300X | 0.96429443359375 |
| NODE1520X | NODE529X  | NODE998X  | 0.96429443359375 |
| NODE1521X | GENE126X  | GENE122X  | 0.9642333984375  |
| NODE1522X | GENE478X  | GENE2489X | 0.9642333984375  |
| NODE1523X | GENE1375X | GENE1780X | 0.9642333984375  |
| NODE1524X | NODE1205X | NODE1348X | 0.9642333984375  |
| NODE1525X | NODE1134X | NODE584X  | 0.96417236328125 |
| NODE1526X | GENE1754X | GENE471X  | 0.964111328125   |
| NODE1527X | NODE1077X | GENE204X  | 0.9639892578125  |
| NODE1528X | GENE819X  | NODE965X  | 0.96392822265625 |
| NODE1529X | NODE732X  | NODE1272X | 0.96392822265625 |
| NODE1530X | NODE1007X | NODE1194X | 0.96392822265625 |
| NODE1531X | NODE1063X | NODE856X  | 0.9638671875     |
| NODE1532X | NODE1244X | GENE1050X | 0.9638671875     |
| NODE1533X | GENE2258X | GENE58X   | 0.96380615234375 |
| NODE1534X | GENE1568X | NODE611X  | 0.9637451171875  |
| NODE1535X | NODE912X  | NODE943X  | 0.9637451171875  |
| NODE1536X | NODE1416X | NODE951X  | 0.9637451171875  |
| NODE1537X | GENE1687X | GENE157X  | 0.96368408203125 |
| NODE1538X | GENE2606X | GENE886X  | 0.96368408203125 |
| NODE1539X | NODE969X  | NODE1186X | 0.963623046875   |

|           |           |           |                  |
|-----------|-----------|-----------|------------------|
| NODE1540X | GENE188X  | NODE1343X | 0.96343994140625 |
| NODE1541X | NODE1033X | GENE462X  | 0.96319580078125 |
| NODE1542X | NODE1214X | GENE2202X | 0.96319580078125 |
| NODE1543X | NODE935X  | NODE461X  | 0.96319580078125 |
| NODE1544X | GENE1172X | NODE1093X | 0.96307373046875 |
| NODE1545X | NODE1256X | NODE777X  | 0.96307373046875 |
| NODE1546X | GENE149X  | GENE220X  | 0.96295166015625 |
| NODE1547X | GENE2045X | GENE1063X | 0.96295166015625 |
| NODE1548X | GENE1928X | GENE1938X | 0.96270751953125 |
| NODE1549X | NODE1125X | GENE2541X | 0.962646484375   |
| NODE1550X | GENE2166X | NODE1100X | 0.96258544921875 |
| NODE1551X | NODE1323X | NODE1091X | 0.96258544921875 |
| NODE1552X | GENE2283X | GENE2305X | 0.96240234375    |
| NODE1553X | NODE1132X | GENE1815X | 0.96234130859375 |
| NODE1554X | NODE930X  | NODE1318X | 0.96234130859375 |
| NODE1555X | NODE1238X | NODE699X  | 0.96221923828125 |
| NODE1556X | GENE1849X | GENE730X  | 0.962158203125   |
| NODE1557X | GENE1019X | GENE1100X | 0.962158203125   |
| NODE1558X | NODE1169X | GENE1831X | 0.962158203125   |
| NODE1559X | NODE745X  | NODE908X  | 0.962158203125   |
| NODE1560X | GENE1941X | GENE758X  | 0.96209716796875 |
| NODE1561X | GENE931X  | GENE1428X | 0.96209716796875 |
| NODE1562X | GENE2514X | NODE946X  | 0.96209716796875 |
| NODE1563X | GENE1949X | NODE1151X | 0.96209716796875 |
| NODE1564X | GENE2472X | GENE2627X | 0.9619140625     |
| NODE1565X | NODE1040X | NODE976X  | 0.9619140625     |
| NODE1566X | GENE1483X | GENE391X  | 0.96185302734375 |
| NODE1567X | GENE900X  | NODE1039X | 0.96185302734375 |
| NODE1568X | GENE2609X | GENE2042X | 0.96185302734375 |
| NODE1569X | GENE2658X | NODE1074X | 0.96185302734375 |
| NODE1570X | NODE1054X | NODE447X  | 0.96185302734375 |
| NODE1571X | NODE1127X | NODE680X  | 0.96185302734375 |
| NODE1572X | NODE942X  | NODE1301X | 0.96185302734375 |
| NODE1573X | GENE581X  | GENE1806X | 0.9617919921875  |
| NODE1574X | GENE339X  | NODE1234X | 0.96173095703125 |
| NODE1575X | GENE1316X | NODE806X  | 0.961669921875   |
| NODE1576X | NODE936X  | NODE1058X | 0.961669921875   |
| NODE1577X | NODE866X  | NODE1303X | 0.961669921875   |
| NODE1578X | GENE2304X | GENE2642X | 0.96160888671875 |
| NODE1579X | NODE1279X | GENE2659X | 0.96160888671875 |
| NODE1580X | GENE2542X | GENE144X  | 0.96148681640625 |
| NODE1581X | NODE1001X | GENE1418X | 0.96148681640625 |
| NODE1582X | NODE892X  | NODE1389X | 0.96148681640625 |
| NODE1583X | NODE913X  | GENE1838X | 0.96142578125    |
| NODE1584X | NODE590X  | GENE2629X | 0.96142578125    |
| NODE1585X | GENE2315X | NODE1101X | 0.9613037109375  |
| NODE1586X | GENE376X  | GENE2100X | 0.961181640625   |
| NODE1587X | GENE2665X | GENE490X  | 0.9610595703125  |
| NODE1588X | GENE1329X | NODE366X  | 0.9610595703125  |
| NODE1589X | NODE1292X | NODE1055X | 0.96099853515625 |
| NODE1590X | GENE1097X | GENE2371X | 0.96087646484375 |
| NODE1591X | NODE810X  | NODE1098X | 0.96087646484375 |
| NODE1592X | GENE592X  | NODE1105X | 0.96087646484375 |
| NODE1593X | NODE479X  | GENE2536X | 0.9608154296875  |
| NODE1594X | NODE1233X | GENE1114X | 0.96075439453125 |
| NODE1595X | NODE982X  | NODE1097X | 0.960693359375   |
| NODE1596X | NODE648X  | GENE487X  | 0.96063232421875 |

|           |           |           |                  |
|-----------|-----------|-----------|------------------|
| NODE1597X | GENE215X  | NODE1369X | 0.96051025390625 |
| NODE1598X | GENE2068X | GENE76X   | 0.96044921875    |
| NODE1599X | GENE1021X | NODE850X  | 0.96044921875    |
| NODE1600X | NODE1094X | NODE283X  | 0.96044921875    |
| NODE1601X | GENE1761X | NODE1216X | 0.96044921875    |
| NODE1602X | GENE2557X | NODE1363X | 0.96044921875    |
| NODE1603X | GENE205X  | NODE1068X | 0.96038818359375 |
| NODE1604X | NODE572X  | NODE1145X | 0.96038818359375 |
| NODE1605X | NODE1235X | GENE357X  | 0.9603271484375  |
| NODE1606X | GENE847X  | GENE1523X | 0.960205078125   |
| NODE1607X | GENE1665X | GENE1593X | 0.960205078125   |
| NODE1608X | NODE1315X | GENE482X  | 0.96014404296875 |
| NODE1609X | GENE2337X | GENE1059X | 0.9600830078125  |
| NODE1610X | NODE1049X | NODE980X  | 0.9600830078125  |
| NODE1611X | NODE505X  | NODE937X  | 0.95965576171875 |
| NODE1612X | NODE653X  | NODE1254X | 0.95965576171875 |
| NODE1613X | NODE671X  | NODE1147X | 0.95965576171875 |
| NODE1614X | NODE812X  | NODE725X  | 0.95953369140625 |
| NODE1615X | NODE1210X | NODE1221X | 0.95953369140625 |
| NODE1616X | NODE1018X | GENE1123X | 0.95941162109375 |
| NODE1617X | GENE171X  | GENE2183X | 0.959228515625   |
| NODE1618X | GENE1655X | GENE2003X | 0.959228515625   |
| NODE1619X | NODE716X  | NODE1184X | 0.959228515625   |
| NODE1620X | NODE1056X | NODE1295X | 0.959228515625   |
| NODE1621X | GENE2122X | NODE797X  | 0.9591064453125  |
| NODE1622X | NODE1199X | NODE1137X | 0.9591064453125  |
| NODE1623X | NODE988X  | NODE994X  | 0.958984375      |
| NODE1624X | GENE408X  | NODE968X  | 0.95880126953125 |
| NODE1625X | GENE2152X | GENE709X  | 0.95880126953125 |
| NODE1626X | GENE37X   | GENE1005X | 0.958740234375   |
| NODE1627X | NODE790X  | GENE265X  | 0.958740234375   |
| NODE1628X | GENE919X  | GENE629X  | 0.958740234375   |
| NODE1629X | GENE1525X | GENE1077X | 0.958740234375   |
| NODE1630X | NODE827X  | GENE2048X | 0.958740234375   |
| NODE1631X | GENE761X  | GENE1168X | 0.95867919921875 |
| NODE1632X | NODE1060X | GENE911X  | 0.95867919921875 |
| NODE1633X | GENE82X   | NODE1269X | 0.95867919921875 |
| NODE1634X | NODE746X  | NODE1042X | 0.9586181640625  |
| NODE1635X | NODE803X  | GENE6X    | 0.95849609375    |
| NODE1636X | NODE1412X | NODE888X  | 0.95849609375    |
| NODE1637X | NODE1372X | NODE1115X | 0.95849609375    |
| NODE1638X | NODE1334X | NODE999X  | 0.95843505859375 |
| NODE1639X | GENE2432X | GENE2032X | 0.9583740234375  |
| NODE1640X | NODE829X  | GENE1574X | 0.95831298828125 |
| NODE1641X | NODE1150X | NODE1407X | 0.95831298828125 |
| NODE1642X | NODE1290X | NODE1162X | 0.95831298828125 |
| NODE1643X | NODE1246X | GENE2329X | 0.95819091796875 |
| NODE1644X | NODE668X  | NODE1161X | 0.95819091796875 |
| NODE1645X | NODE1201X | NODE816X  | 0.95819091796875 |
| NODE1646X | NODE1317X | NODE1536X | 0.95819091796875 |
| NODE1647X | NODE1213X | GENE38X   | 0.9581298828125  |
| NODE1648X | GENE1588X | GENE1530X | 0.9581298828125  |
| NODE1649X | NODE844X  | NODE957X  | 0.9581298828125  |
| NODE1650X | GENE1542X | GENE1630X | 0.9580078125     |
| NODE1651X | NODE1175X | NODE1294X | 0.95794677734375 |
| NODE1652X | GENE2549X | GENE2484X | 0.9578857421875  |
| NODE1653X | GENE2028X | GENE2158X | 0.95782470703125 |

|           |           |           |                  |
|-----------|-----------|-----------|------------------|
| NODE1654X | NODE830X  | GENE2138X | 0.95782470703125 |
| NODE1655X | NODE1160X | NODE1265X | 0.957763671875   |
| NODE1656X | NODE1289X | NODE765X  | 0.95770263671875 |
| NODE1657X | GENE1801X | GENE1800X | 0.9576416015625  |
| NODE1658X | NODE1089X | NODE1501X | 0.9576416015625  |
| NODE1659X | NODE1220X | GENE1000X | 0.95758056640625 |
| NODE1660X | NODE1241X | NODE1327X | 0.95758056640625 |
| NODE1661X | NODE1236X | NODE837X  | 0.95751953125    |
| NODE1662X | GENE678X  | NODE1253X | 0.95745849609375 |
| NODE1663X | GENE659X  | GENE830X  | 0.9573974609375  |
| NODE1664X | GENE2614X | GENE2328X | 0.9573974609375  |
| NODE1665X | NODE1086X | NODE1554X | 0.9573974609375  |
| NODE1666X | NODE1171X | NODE570X  | 0.95733642578125 |
| NODE1667X | NODE1551X | NODE1129X | 0.95733642578125 |
| NODE1668X | NODE678X  | GENE1844X | 0.957275390625   |
| NODE1669X | NODE592X  | NODE1038X | 0.95709228515625 |
| NODE1670X | GENE1654X | GENE182X  | 0.95697021484375 |
| NODE1671X | GENE589X  | GENE2063X | 0.95697021484375 |
| NODE1672X | GENE1689X | GENE1346X | 0.95697021484375 |
| NODE1673X | NODE1223X | NODE1385X | 0.95697021484375 |
| NODE1674X | NODE1593X | NODE1062X | 0.95697021484375 |
| NODE1675X | GENE869X  | NODE1367X | 0.9569091796875  |
| NODE1676X | GENE745X  | GENE1765X | 0.95684814453125 |
| NODE1677X | GENE1460X | GENE562X  | 0.956787109375   |
| NODE1678X | NODE970X  | NODE1071X | 0.95672607421875 |
| NODE1679X | NODE1396X | NODE1202X | 0.95672607421875 |
| NODE1680X | GENE2413X | GENE2450X | 0.9566650390625  |
| NODE1681X | NODE1507X | GENE1477X | 0.95660400390625 |
| NODE1682X | NODE527X  | NODE1173X | 0.95648193359375 |
| NODE1683X | NODE1368X | NODE723X  | 0.95635986328125 |
| NODE1684X | NODE1376X | NODE1262X | 0.956298828125   |
| NODE1685X | NODE869X  | NODE1251X | 0.95623779296875 |
| NODE1686X | GENE1703X | GENE488X  | 0.9561767578125  |
| NODE1687X | NODE1242X | NODE1495X | 0.9561767578125  |
| NODE1688X | NODE985X  | NODE1467X | 0.95611572265625 |
| NODE1689X | GENE1368X | GENE2118X | 0.9560546875     |
| NODE1690X | GENE780X  | NODE1096X | 0.95599365234375 |
| NODE1691X | NODE574X  | NODE1482X | 0.9559326171875  |
| NODE1692X | NODE1610X | NODE1479X | 0.9559326171875  |
| NODE1693X | GENE1129X | NODE747X  | 0.95587158203125 |
| NODE1694X | NODE1502X | NODE1229X | 0.95562744140625 |
| NODE1695X | GENE2379X | NODE727X  | 0.95556640625    |
| NODE1696X | NODE526X  | NODE1231X | 0.95556640625    |
| NODE1697X | NODE1296X | NODE1053X | 0.95556640625    |
| NODE1698X | GENE1361X | GENE78X   | 0.95550537109375 |
| NODE1699X | NODE1447X | NODE1130X | 0.955322265625   |
| NODE1700X | GENE2086X | NODE1177X | 0.95526123046875 |
| NODE1701X | GENE1543X | NODE624X  | 0.9552001953125  |
| NODE1702X | GENE2037X | NODE849X  | 0.9552001953125  |
| NODE1703X | NODE907X  | NODE1183X | 0.9552001953125  |
| NODE1704X | NODE1436X | NODE1057X | 0.95513916015625 |
| NODE1705X | NODE1174X | NODE1346X | 0.95513916015625 |
| NODE1706X | NODE1382X | GENE112X  | 0.95501708984375 |
| NODE1707X | NODE1298X | GENE748X  | 0.9549560546875  |
| NODE1708X | NODE1429X | NODE1081X | 0.95489501953125 |
| NODE1709X | GENE2412X | GENE180X  | 0.95477294921875 |
| NODE1710X | GENE212X  | GENE1047X | 0.95477294921875 |

|           |           |           |                  |
|-----------|-----------|-----------|------------------|
| NODE1711X | NODE591X  | GENE1779X | 0.95477294921875 |
| NODE1712X | GENE1149X | NODE1520X | 0.9547119140625  |
| NODE1713X | NODE1522X | GENE294X  | 0.9547119140625  |
| NODE1714X | NODE1176X | GENE680X  | 0.95465087890625 |
| NODE1715X | NODE1374X | NODE1117X | 0.9544677734375  |
| NODE1716X | NODE1259X | NODE1277X | 0.9544677734375  |
| NODE1717X | NODE1460X | GENE1611X | 0.95428466796875 |
| NODE1718X | NODE1139X | GENE179X  | 0.9542236328125  |
| NODE1719X | NODE1079X | NODE1576X | 0.9542236328125  |
| NODE1720X | NODE1380X | GENE1947X | 0.95416259765625 |
| NODE1721X | NODE1449X | NODE1032X | 0.95416259765625 |
| NODE1722X | NODE1059X | GENE63X   | 0.95404052734375 |
| NODE1723X | NODE762X  | NODE818X  | 0.9539794921875  |
| NODE1724X | NODE613X  | NODE1310X | 0.95391845703125 |
| NODE1725X | NODE1377X | NODE1271X | 0.95379638671875 |
| NODE1726X | NODE685X  | GENE90X   | 0.9534912109375  |
| NODE1727X | NODE1535X | NODE688X  | 0.9534912109375  |
| NODE1728X | GENE2591X | GENE74X   | 0.95343017578125 |
| NODE1729X | NODE1388X | GENE1098X | 0.95330810546875 |
| NODE1730X | NODE990X  | NODE1600X | 0.9532470703125  |
| NODE1731X | NODE1550X | GENE1230X | 0.95318603515625 |
| NODE1732X | GENE2218X | NODE1673X | 0.95318603515625 |
| NODE1733X | NODE1353X | NODE1120X | 0.953125         |
| NODE1734X | NODE897X  | GENE595X  | 0.95306396484375 |
| NODE1735X | GENE1524X | NODE1381X | 0.9530029296875  |
| NODE1736X | GENE936X  | NODE1440X | 0.95281982421875 |
| NODE1737X | GENE2674X | GENE1304X | 0.9527587890625  |
| NODE1738X | NODE1182X | NODE1418X | 0.9527587890625  |
| NODE1739X | GENE314X  | GENE1917X | 0.95269775390625 |
| NODE1740X | GENE1206X | GENE2038X | 0.95257568359375 |
| NODE1741X | GENE1002X | GENE1583X | 0.9525146484375  |
| NODE1742X | NODE1492X | NODE1026X | 0.9525146484375  |
| NODE1743X | NODE1425X | GENE2225X | 0.9525146484375  |
| NODE1744X | GENE1974X | NODE1525X | 0.95220947265625 |
| NODE1745X | NODE1109X | NODE1281X | 0.95220947265625 |
| NODE1746X | GENE2624X | GENE189X  | 0.9521484375     |
| NODE1747X | NODE1261X | NODE1138X | 0.95208740234375 |
| NODE1748X | NODE1222X | NODE1499X | 0.9520263671875  |
| NODE1749X | GENE1547X | GENE1143X | 0.95196533203125 |
| NODE1750X | NODE1577X | NODE1243X | 0.95196533203125 |
| NODE1751X | NODE811X  | NODE1314X | 0.951904296875   |
| NODE1752X | NODE1530X | GENE797X  | 0.951904296875   |
| NODE1753X | GENE298X  | NODE1197X | 0.95147705078125 |
| NODE1754X | GENE289X  | NODE910X  | 0.951416015625   |
| NODE1755X | NODE884X  | NODE1329X | 0.951416015625   |
| NODE1756X | NODE1404X | NODE1165X | 0.951416015625   |
| NODE1757X | GENE1026X | GENE870X  | 0.95135498046875 |
| NODE1758X | GENE2550X | GENE2645X | 0.95135498046875 |
| NODE1759X | GENE1552X | NODE1341X | 0.9512939453125  |
| NODE1760X | NODE1286X | NODE1118X | 0.9512939453125  |
| NODE1761X | GENE2527X | GENE1371X | 0.95123291015625 |
| NODE1762X | NODE1350X | NODE1245X | 0.95111083984375 |
| NODE1763X | NODE1514X | GENE580X  | 0.9510498046875  |
| NODE1764X | NODE1140X | NODE1444X | 0.950927734375   |
| NODE1765X | NODE1590X | GENE186X  | 0.9508056640625  |
| NODE1766X | NODE983X  | NODE1539X | 0.95074462890625 |
| NODE1767X | NODE1123X | NODE1383X | 0.95068359375    |

|           |           |           |                  |
|-----------|-----------|-----------|------------------|
| NODE1768X | GENE766X  | GENE2476X | 0.95062255859375 |
| NODE1769X | GENE2564X | GENE1763X | 0.95050048828125 |
| NODE1770X | NODE1373X | NODE1114X | 0.95050048828125 |
| NODE1771X | GENE1334X | GENE1154X | 0.950439453125   |
| NODE1772X | GENE1968X | GENE1209X | 0.950439453125   |
| NODE1773X | NODE1585X | NODE1352X | 0.950439453125   |
| NODE1774X | GENE898X  | NODE1275X | 0.95025634765625 |
| NODE1775X | NODE1397X | NODE1208X | 0.95013427734375 |
| NODE1776X | GENE1489X | GENE1965X | 0.9500732421875  |
| NODE1777X | NODE878X  | NODE993X  | 0.94989013671875 |
| NODE1778X | NODE1339X | NODE700X  | 0.9498291015625  |
| NODE1779X | GENE297X  | GENE707X  | 0.94964599609375 |
| NODE1780X | GENE1400X | NODE971X  | 0.9495849609375  |
| NODE1781X | NODE1307X | NODE1414X | 0.94952392578125 |
| NODE1782X | GENE293X  | GENE2509X | 0.949462890625   |
| NODE1783X | GENE574X  | GENE1273X | 0.94921875       |
| NODE1784X | GENE732X  | GENE1837X | 0.94921875       |
| NODE1785X | NODE828X  | NODE885X  | 0.94921875       |
| NODE1786X | GENE231X  | GENE1194X | 0.9490966796875  |
| NODE1787X | NODE1622X | NODE1438X | 0.94903564453125 |
| NODE1788X | GENE1875X | GENE464X  | 0.948974609375   |
| NODE1789X | GENE1862X | GENE1861X | 0.948974609375   |
| NODE1790X | NODE1508X | GENE1349X | 0.948974609375   |
| NODE1791X | NODE1635X | GENE2071X | 0.94873046875    |
| NODE1792X | GENE2436X | GENE2291X | 0.94873046875    |
| NODE1793X | NODE1419X | GENE1013X | 0.94866943359375 |
| NODE1794X | NODE755X  | GENE100X  | 0.94866943359375 |
| NODE1795X | NODE1187X | GENE733X  | 0.9486083984375  |
| NODE1796X | GENE1348X | GENE1893X | 0.948486328125   |
| NODE1797X | GENE1646X | NODE1299X | 0.948486328125   |
| NODE1798X | GENE1376X | NODE1707X | 0.948486328125   |
| NODE1799X | NODE1128X | NODE1445X | 0.9482421875     |
| NODE1800X | NODE1546X | NODE1628X | 0.9482421875     |
| NODE1801X | GENE952X  | NODE1357X | 0.9481201171875  |
| NODE1802X | NODE997X  | NODE1623X | 0.9481201171875  |
| NODE1803X | NODE1043X | NODE1582X | 0.94805908203125 |
| NODE1804X | NODE1375X | NODE1589X | 0.947998046875   |
| NODE1805X | NODE1504X | NODE1511X | 0.947998046875   |
| NODE1806X | NODE989X  | NODE1667X | 0.94775390625    |
| NODE1807X | NODE1583X | GENE1240X | 0.94769287109375 |
| NODE1808X | NODE899X  | NODE1248X | 0.94757080078125 |
| NODE1809X | NODE1198X | GENE152X  | 0.9473876953125  |
| NODE1810X | GENE2271X | NODE1613X | 0.94732666015625 |
| NODE1811X | NODE1342X | GENE667X  | 0.947265625      |
| NODE1812X | GENE990X  | GENE484X  | 0.94720458984375 |
| NODE1813X | NODE1669X | GENE308X  | 0.947021484375   |
| NODE1814X | GENE1484X | NODE1428X | 0.9468994140625  |
| NODE1815X | NODE1166X | NODE1356X | 0.94683837890625 |
| NODE1816X | GENE795X  | GENE1408X | 0.94671630859375 |
| NODE1817X | GENE163X  | GENE1548X | 0.94659423828125 |
| NODE1818X | GENE1845X | NODE956X  | 0.9464111328125  |
| NODE1819X | GENE1799X | GENE2018X | 0.94635009765625 |
| NODE1820X | NODE1237X | NODE835X  | 0.9462890625     |
| NODE1821X | GENE1453X | NODE1025X | 0.94622802734375 |
| NODE1822X | NODE1313X | NODE1288X | 0.9461669921875  |
| NODE1823X | NODE1143X | NODE1601X | 0.946044921875   |
| NODE1824X | GENE1464X | NODE1392X | 0.94598388671875 |



|           |           |           |                  |
|-----------|-----------|-----------|------------------|
| NODE1825X | NODE1326X | NODE1305X | 0.94580078125    |
| NODE1826X | NODE1716X | NODE1483X | 0.94580078125    |
| NODE1827X | NODE1252X | NODE1002X | 0.9456787109375  |
| NODE1828X | NODE1561X | NODE1167X | 0.9456787109375  |
| NODE1829X | GENE1636X | GENE890X  | 0.94561767578125 |
| NODE1830X | GENE1218X | GENE446X  | 0.945556640625   |
| NODE1831X | NODE1533X | GENE2116X | 0.945556640625   |
| NODE1832X | NODE1443X | NODE917X  | 0.9453125        |
| NODE1833X | NODE1417X | NODE918X  | 0.94525146484375 |
| NODE1834X | NODE1752X | NODE1401X | 0.94512939453125 |
| NODE1835X | NODE1306X | NODE1258X | 0.94500732421875 |
| NODE1836X | NODE1351X | NODE1524X | 0.94500732421875 |
| NODE1837X | GENE2559X | GENE97X   | 0.9449462890625  |
| NODE1838X | GENE518X  | NODE1320X | 0.9449462890625  |
| NODE1839X | GENE2205X | NODE1000X | 0.9449462890625  |
| NODE1840X | NODE1475X | NODE1041X | 0.9449462890625  |
| NODE1841X | NODE1424X | NODE1360X | 0.9447021484375  |
| NODE1842X | NODE1020X | NODE1678X | 0.94451904296875 |
| NODE1843X | GENE2572X | NODE1285X | 0.9444580078125  |
| NODE1844X | NODE1662X | GENE2654X | 0.94439697265625 |
| NODE1845X | NODE1426X | NODE1087X | 0.9443359375     |
| NODE1846X | NODE1571X | NODE1036X | 0.94427490234375 |
| NODE1847X | NODE1452X | GENE2525X | 0.94427490234375 |
| NODE1848X | GENE2618X | GENE165X  | 0.94415283203125 |
| NODE1849X | NODE1273X | NODE1489X | 0.94415283203125 |
| NODE1850X | GENE142X  | GENE226X  | 0.94378662109375 |
| NODE1851X | NODE1268X | GENE1081X | 0.94378662109375 |
| NODE1852X | NODE1780X | NODE1200X | 0.94366455078125 |
| NODE1853X | NODE1028X | NODE1260X | 0.943603515625   |
| NODE1854X | NODE1486X | NODE1180X | 0.94354248046875 |
| NODE1855X | GENE1139X | NODE1430X | 0.9434814453125  |
| NODE1856X | NODE698X  | NODE1119X | 0.94342041015625 |
| NODE1857X | NODE1309X | NODE1386X | 0.94342041015625 |
| NODE1858X | NODE576X  | GENE879X  | 0.943359375      |
| NODE1859X | NODE1156X | NODE1232X | 0.943115234375   |
| NODE1860X | NODE1267X | NODE1734X | 0.94256591796875 |
| NODE1861X | GENE1518X | NODE1603X | 0.94244384765625 |
| NODE1862X | GENE1198X | NODE1796X | 0.9423828125     |
| NODE1863X | GENE2121X | NODE1110X | 0.9422607421875  |
| NODE1864X | GENE1465X | GENE1587X | 0.94183349609375 |
| NODE1865X | GENE1635X | GENE2634X | 0.94183349609375 |
| NODE1866X | NODE1227X | NODE1335X | 0.94183349609375 |
| NODE1867X | NODE1470X | NODE1338X | 0.941650390625   |
| NODE1868X | GENE1648X | NODE1349X | 0.9415283203125  |
| NODE1869X | NODE1155X | GENE720X  | 0.941162109375   |
| NODE1870X | GENE1164X | GENE2247X | 0.940673828125   |
| NODE1871X | NODE295X  | GENE1653X | 0.9405517578125  |
| NODE1872X | NODE1462X | NODE1580X | 0.9404296875     |
| NODE1873X | GENE980X  | NODE975X  | 0.94036865234375 |
| NODE1874X | NODE1682X | NODE1395X | 0.94036865234375 |
| NODE1875X | NODE1158X | GENE615X  | 0.9403076171875  |
| NODE1876X | GENE1785X | GENE1285X | 0.9403076171875  |
| NODE1877X | GENE960X  | NODE1490X | 0.94024658203125 |
| NODE1878X | GENE1906X | GENE1352X | 0.940185546875   |
| NODE1879X | NODE1742X | NODE1468X | 0.940185546875   |
| NODE1880X | GENE2036X | NODE1451X | 0.94012451171875 |
| NODE1881X | GENE868X  | NODE1526X | 0.94000244140625 |

|           |           |           |                  |
|-----------|-----------|-----------|------------------|
| NODE1882X | NODE1473X | NODE1681X | 0.93994140625    |
| NODE1883X | NODE1471X | GENE901X  | 0.939697265625   |
| NODE1884X | NODE1466X | GENE1624X | 0.939697265625   |
| NODE1885X | NODE1644X | NODE1423X | 0.93963623046875 |
| NODE1886X | GENE130X  | GENE1500X | 0.939453125      |
| NODE1887X | NODE1656X | NODE1446X | 0.939453125      |
| NODE1888X | NODE1762X | NODE1802X | 0.939453125      |
| NODE1889X | NODE1503X | NODE1747X | 0.9393310546875  |
| NODE1890X | GENE2649X | NODE1693X | 0.939208984375   |
| NODE1891X | NODE1219X | NODE1226X | 0.9390869140625  |
| NODE1892X | NODE1393X | NODE1785X | 0.9388427734375  |
| NODE1893X | GENE2104X | GENE674X  | 0.938720703125   |
| NODE1894X | GENE853X  | GENE2005X | 0.93841552734375 |
| NODE1895X | NODE1493X | NODE1521X | 0.9381103515625  |
| NODE1896X | NODE1637X | NODE1432X | 0.93804931640625 |
| NODE1897X | GENE2656X | NODE1568X | 0.93792724609375 |
| NODE1898X | NODE1696X | GENE2153X | 0.9378662109375  |
| NODE1899X | NODE1684X | NODE1453X | 0.937744140625   |
| NODE1900X | GENE1948X | NODE1458X | 0.937744140625   |
| NODE1901X | NODE1476X | NODE1666X | 0.937744140625   |
| NODE1902X | NODE1634X | NODE1478X | 0.93768310546875 |
| NODE1903X | NODE1559X | NODE1390X | 0.9376220703125  |
| NODE1904X | NODE832X  | NODE1284X | 0.93743896484375 |
| NODE1905X | NODE1333X | NODE1172X | 0.93743896484375 |
| NODE1906X | GENE2605X | GENE2276X | 0.9371337890625  |
| NODE1907X | GENE72X   | GENE628X  | 0.93695068359375 |
| NODE1908X | NODE1488X | NODE1500X | 0.93682861328125 |
| NODE1909X | GENE1171X | GENE774X  | 0.93646240234375 |
| NODE1910X | NODE1218X | NODE1665X | 0.93646240234375 |
| NODE1911X | GENE1431X | NODE1293X | 0.936279296875   |
| NODE1912X | NODE1815X | NODE1528X | 0.9361572265625  |
| NODE1913X | GENE2576X | NODE1164X | 0.93585205078125 |
| NODE1914X | NODE1702X | GENE1281X | 0.935791015625   |
| NODE1915X | NODE1658X | NODE1513X | 0.935791015625   |
| NODE1916X | NODE1674X | GENE1377X | 0.935546875      |
| NODE1917X | NODE1612X | NODE1358X | 0.935546875      |
| NODE1918X | NODE854X  | NODE1052X | 0.93548583984375 |
| NODE1919X | GENE2046X | NODE1364X | 0.9351806640625  |
| NODE1920X | NODE1842X | NODE1805X | 0.9351806640625  |
| NODE1921X | NODE1133X | NODE1687X | 0.93499755859375 |
| NODE1922X | NODE1387X | NODE1016X | 0.93475341796875 |
| NODE1923X | NODE1727X | NODE1645X | 0.9346923828125  |
| NODE1924X | GENE166X  | NODE1361X | 0.93463134765625 |
| NODE1925X | GENE591X  | GENE824X  | 0.93463134765625 |
| NODE1926X | GENE88X   | GENE799X  | 0.9342041015625  |
| NODE1927X | NODE1400X | GENE273X  | 0.93408203125    |
| NODE1928X | GENE1705X | NODE1224X | 0.93402099609375 |
| NODE1929X | GENE731X  | NODE1829X | 0.93402099609375 |
| NODE1930X | NODE1697X | NODE1066X | 0.93389892578125 |
| NODE1931X | NODE1616X | NODE1759X | 0.933837890625   |
| NODE1932X | NODE1420X | NODE1435X | 0.93365478515625 |
| NODE1933X | NODE1745X | NODE1464X | 0.93365478515625 |
| NODE1934X | GENE727X  | NODE1870X | 0.93359375       |
| NODE1935X | NODE1142X | GENE1351X | 0.93353271484375 |
| NODE1936X | GENE432X  | NODE1450X | 0.93341064453125 |
| NODE1937X | NODE1496X | NODE1403X | 0.93341064453125 |
| NODE1938X | NODE949X  | NODE1302X | 0.933349609375   |

|           |           |           |                  |
|-----------|-----------|-----------|------------------|
| NODE1939X | NODE1833X | NODE1891X | 0.93328857421875 |
| NODE1940X | NODE1228X | NODE1355X | 0.93304443359375 |
| NODE1941X | NODE1614X | NODE1591X | 0.93304443359375 |
| NODE1942X | GENE200X  | NODE1441X | 0.9329833984375  |
| NODE1943X | NODE1748X | NODE1773X | 0.93292236328125 |
| NODE1944X | NODE1196X | NODE1190X | 0.932861328125   |
| NODE1945X | NODE1699X | NODE1797X | 0.9327392578125  |
| NODE1946X | NODE1757X | NODE1311X | 0.9327392578125  |
| NODE1947X | GENE1425X | NODE1459X | 0.93231201171875 |
| NODE1948X | GENE1336X | NODE1399X | 0.9322509765625  |
| NODE1949X | NODE1680X | NODE1340X | 0.93206787109375 |
| NODE1950X | NODE1484X | NODE1723X | 0.93170166015625 |
| NODE1951X | NODE1529X | NODE1660X | 0.93170166015625 |
| NODE1952X | NODE1672X | NODE306X  | 0.931640625      |
| NODE1953X | GENE296X  | GENE1608X | 0.93133544921875 |
| NODE1954X | NODE1558X | NODE1586X | 0.9312744140625  |
| NODE1955X | GENE894X  | GENE2192X | 0.93115234375    |
| NODE1956X | NODE1694X | GENE1656X | 0.930908203125   |
| NODE1957X | GENE510X  | GENE1922X | 0.9307861328125  |
| NODE1958X | NODE1439X | NODE1701X | 0.9307861328125  |
| NODE1959X | NODE1679X | NODE1570X | 0.9306640625     |
| NODE1960X | GENE1603X | NODE1004X | 0.9305419921875  |
| NODE1961X | GENE1263X | GENE1992X | 0.9302978515625  |
| NODE1962X | NODE1683X | NODE1215X | 0.93017578125    |
| NODE1963X | NODE1565X | NODE1735X | 0.9300537109375  |
| NODE1964X | NODE1824X | NODE1163X | 0.92999267578125 |
| NODE1965X | NODE1651X | NODE1892X | 0.92999267578125 |
| NODE1966X | NODE1523X | NODE1297X | 0.929931640625   |
| NODE1967X | NODE1347X | NODE1630X | 0.92974853515625 |
| NODE1968X | NODE1181X | NODE1485X | 0.9296875        |
| NODE1969X | NODE1472X | NODE1405X | 0.9295654296875  |
| NODE1970X | NODE1193X | NODE1746X | 0.92950439453125 |
| NODE1971X | NODE1867X | NODE1515X | 0.929443359375   |
| NODE1972X | NODE1822X | GENE431X  | 0.92926025390625 |
| NODE1973X | GENE2351X | GENE1078X | 0.92926025390625 |
| NODE1974X | NODE501X  | GENE80X   | 0.928955078125   |
| NODE1975X | NODE1548X | GENE725X  | 0.928955078125   |
| NODE1976X | GENE2496X | NODE1869X | 0.9288330078125  |
| NODE1977X | GENE2053X | GENE1234X | 0.92877197265625 |
| NODE1978X | NODE962X  | GENE1404X | 0.9287109375     |
| NODE1979X | GENE1914X | NODE1886X | 0.9287109375     |
| NODE1980X | NODE1413X | GENE722X  | 0.92864990234375 |
| NODE1981X | NODE1632X | GENE1770X | 0.92864990234375 |
| NODE1982X | GENE2103X | GENE2301X | 0.92864990234375 |
| NODE1983X | NODE1777X | NODE1531X | 0.92828369140625 |
| NODE1984X | GENE2195X | GENE470X  | 0.92822265625    |
| NODE1985X | NODE1691X | NODE1615X | 0.92816162109375 |
| NODE1986X | NODE1545X | NODE1517X | 0.92803955078125 |
| NODE1987X | NODE1806X | NODE1825X | 0.92803955078125 |
| NODE1988X | GENE2399X | GENE2672X | 0.927978515625   |
| NODE1989X | NODE1362X | NODE1755X | 0.9278564453125  |
| NODE1990X | NODE1240X | NODE1179X | 0.92767333984375 |
| NODE1991X | NODE1846X | NODE1519X | 0.92767333984375 |
| NODE1992X | GENE1591X | GENE2135X | 0.92755126953125 |
| NODE1993X | NODE1527X | NODE1512X | 0.927490234375   |
| NODE1994X | NODE1431X | GENE150X  | 0.92730712890625 |
| NODE1995X | NODE1421X | NODE692X  | 0.92730712890625 |

|           |           |           |                  |
|-----------|-----------|-----------|------------------|
| NODE1996X | NODE1433X | NODE1944X | 0.92724609375    |
| NODE1997X | NODE1494X | NODE1411X | 0.9271240234375  |
| NODE1998X | NODE1540X | NODE1801X | 0.92706298828125 |
| NODE1999X | NODE1409X | NODE1456X | 0.92694091796875 |
| NODE2000X | NODE460X  | GENE692X  | 0.92681884765625 |
| NODE2001X | NODE1560X | NODE1642X | 0.9266357421875  |
| NODE2002X | NODE1765X | GENE102X  | 0.92633056640625 |
| NODE2003X | NODE1563X | NODE687X  | 0.92620849609375 |
| NODE2004X | NODE1778X | NODE1378X | 0.92608642578125 |
| NODE2005X | GENE1936X | GENE338X  | 0.926025390625   |
| NODE2006X | NODE1721X | NODE1814X | 0.9259033203125  |
| NODE2007X | GENE2021X | GENE267X  | 0.92584228515625 |
| NODE2008X | NODE1498X | NODE1207X | 0.92578125       |
| NODE2009X | NODE1704X | NODE1474X | 0.92578125       |
| NODE2010X | NODE1497X | NODE1408X | 0.925537109375   |
| NODE2011X | GENE576X  | GENE1510X | 0.92547607421875 |
| NODE2012X | NODE1505X | NODE1718X | 0.92547607421875 |
| NODE2013X | NODE1549X | NODE1465X | 0.9254150390625  |
| NODE2014X | NODE1469X | GENE773X  | 0.92523193359375 |
| NODE2015X | NODE1608X | NODE1211X | 0.925048828125   |
| NODE2016X | NODE1581X | NODE1230X | 0.925048828125   |
| NODE2017X | NODE1391X | NODE1729X | 0.925048828125   |
| NODE2018X | GENE749X  | NODE1676X | 0.92462158203125 |
| NODE2019X | GENE2451X | NODE1810X | 0.92437744140625 |
| NODE2020X | NODE1916X | NODE966X  | 0.92425537109375 |
| NODE2021X | NODE1506X | NODE1611X | 0.923828125      |
| NODE2022X | NODE1567X | NODE1708X | 0.92376708984375 |
| NODE2023X | NODE1410X | NODE1159X | 0.923583984375   |
| NODE2024X | GENE2482X | NODE1668X | 0.92333984375    |
| NODE2025X | NODE1594X | NODE1619X | 0.9229736328125  |
| NODE2026X | GENE2560X | NODE347X  | 0.92266845703125 |
| NODE2027X | NODE1772X | NODE1088X | 0.92266845703125 |
| NODE2028X | NODE1818X | NODE1596X | 0.92266845703125 |
| NODE2029X | NODE1733X | NODE1569X | 0.92254638671875 |
| NODE2030X | NODE1631X | GENE1911X | 0.92242431640625 |
| NODE2031X | GENE1612X | NODE1354X | 0.92236328125    |
| NODE2032X | NODE1692X | NODE1855X | 0.92218017578125 |
| NODE2033X | NODE1751X | NODE1885X | 0.92205810546875 |
| NODE2034X | NODE1312X | NODE1840X | 0.921630859375   |
| NODE2035X | GENE1940X | NODE1618X | 0.92144775390625 |
| NODE2036X | NODE1454X | GENE1912X | 0.92138671875    |
| NODE2037X | GENE1237X | NODE1700X | 0.9212646484375  |
| NODE2038X | GENE1195X | NODE734X  | 0.92120361328125 |
| NODE2039X | GENE481X  | NODE1695X | 0.921142578125   |
| NODE2040X | NODE1790X | GENE1909X | 0.92108154296875 |
| NODE2041X | GENE1017X | GENE545X  | 0.92095947265625 |
| NODE2042X | NODE1620X | NODE1481X | 0.92095947265625 |
| NODE2043X | GENE1290X | NODE1817X | 0.9207763671875  |
| NODE2044X | NODE1859X | GENE2444X | 0.92071533203125 |
| NODE2045X | NODE1879X | NODE1641X | 0.920654296875   |
| NODE2046X | NODE1442X | NODE1578X | 0.92059326171875 |
| NODE2047X | GENE1322X | NODE1643X | 0.92041015625    |
| NODE2048X | NODE1845X | NODE1804X | 0.92022705078125 |
| NODE2049X | NODE1457X | NODE1455X | 0.91986083984375 |
| NODE2050X | NODE1807X | NODE1764X | 0.91986083984375 |
| NODE2051X | GENE2387X | GENE1930X | 0.91973876953125 |
| NODE2052X | NODE1664X | NODE1864X | 0.91943359375    |

|           |           |           |                  |
|-----------|-----------|-----------|------------------|
| NODE2053X | NODE1146X | NODE920X  | 0.9190673828125  |
| NODE2054X | NODE1732X | NODE979X  | 0.91900634765625 |
| NODE2055X | NODE1542X | NODE1898X | 0.91888427734375 |
| NODE2056X | GENE2007X | GENE842X  | 0.91864013671875 |
| NODE2057X | GENE199X  | NODE1955X | 0.91845703125    |
| NODE2058X | NODE1774X | NODE1766X | 0.9183349609375  |
| NODE2059X | GENE291X  | NODE1487X | 0.91827392578125 |
| NODE2060X | NODE1575X | GENE1456X | 0.91827392578125 |
| NODE2061X | GENE2555X | GENE625X  | 0.918212890625   |
| NODE2062X | GENE1607X | GENE1720X | 0.91815185546875 |
| NODE2063X | NODE1555X | NODE1832X | 0.91790771484375 |
| NODE2064X | NODE1856X | NODE1839X | 0.9178466796875  |
| NODE2065X | GENE141X  | NODE1850X | 0.9176025390625  |
| NODE2066X | NODE1415X | NODE1398X | 0.917236328125   |
| NODE2067X | GENE1858X | GENE1915X | 0.9169921875     |
| NODE2068X | NODE1793X | NODE1509X | 0.91693115234375 |
| NODE2069X | NODE1783X | NODE1851X | 0.91693115234375 |
| NODE2070X | NODE1345X | GENE1900X | 0.91680908203125 |
| NODE2071X | NODE1738X | NODE1703X | 0.916748046875   |
| NODE2072X | NODE1965X | NODE1675X | 0.91656494140625 |
| NODE2073X | GENE2469X | NODE1982X | 0.91632080078125 |
| NODE2074X | NODE1574X | NODE1803X | 0.9161376953125  |
| NODE2075X | NODE1599X | NODE1781X | 0.9158935546875  |
| NODE2076X | NODE1799X | NODE1889X | 0.91571044921875 |
| NODE2077X | NODE1491X | NODE1544X | 0.9156494140625  |
| NODE2078X | NODE1366X | NODE1627X | 0.9151611328125  |
| NODE2079X | NODE1689X | NODE902X  | 0.91497802734375 |
| NODE2080X | NODE1770X | NODE1750X | 0.91473388671875 |
| NODE2081X | NODE1760X | NODE1712X | 0.9146728515625  |
| NODE2082X | NODE1621X | NODE1971X | 0.91461181640625 |
| NODE2083X | NODE1706X | NODE1553X | 0.91436767578125 |
| NODE2084X | NODE1787X | NODE1655X | 0.91436767578125 |
| NODE2085X | NODE1882X | NODE1873X | 0.91387939453125 |
| NODE2086X | NODE1595X | NODE1767X | 0.913818359375   |
| NODE2087X | GENE756X  | GENE597X  | 0.91375732421875 |
| NODE2088X | GENE1870X | NODE2011X | 0.91363525390625 |
| NODE2089X | NODE1836X | NODE1534X | 0.913330078125   |
| NODE2090X | NODE2056X | GENE279X  | 0.913330078125   |
| NODE2091X | NODE1942X | GENE59X   | 0.91314697265625 |
| NODE2092X | NODE1975X | GENE329X  | 0.9130859375     |
| NODE2093X | GENE111X  | NODE1084X | 0.912841796875   |
| NODE2094X | GENE256X  | GENE1415X | 0.91265869140625 |
| NODE2095X | NODE1659X | NODE1786X | 0.91253662109375 |
| NODE2096X | NODE1901X | NODE1266X | 0.91241455078125 |
| NODE2097X | GENE1865X | NODE1461X | 0.912353515625   |
| NODE2098X | NODE1106X | NODE2021X | 0.912109375      |
| NODE2099X | NODE1860X | NODE1685X | 0.91192626953125 |
| NODE2100X | NODE1852X | GENE1797X | 0.9117431640625  |
| NODE2101X | NODE1756X | NODE2016X | 0.91168212890625 |
| NODE2102X | NODE2006X | NODE1904X | 0.91162109375    |
| NODE2103X | GENE660X  | GENE1429X | 0.91156005859375 |
| NODE2104X | NODE1915X | NODE1671X | 0.9114990234375  |
| NODE2105X | GENE1710X | NODE1890X | 0.91143798828125 |
| NODE2106X | NODE2012X | NODE1572X | 0.91107177734375 |
| NODE2107X | GENE1664X | NODE1779X | 0.9110107421875  |
| NODE2108X | GENE105X  | GENE2420X | 0.91094970703125 |
| NODE2109X | GENE2374X | NODE2000X | 0.91094970703125 |

|           |           |           |                  |
|-----------|-----------|-----------|------------------|
| NODE2110X | GENE2534X | NODE1877X | 0.91082763671875 |
| NODE2111X | NODE1291X | NODE1541X | 0.91082763671875 |
| NODE2112X | GENE1332X | GENE1775X | 0.9107666015625  |
| NODE2113X | NODE1516X | NODE1629X | 0.9107666015625  |
| NODE2114X | GENE2625X | NODE1278X | 0.91064453125    |
| NODE2115X | GENE42X   | GENE787X  | 0.91046142578125 |
| NODE2116X | GENE2130X | GENE1109X | 0.910400390625   |
| NODE2117X | GENE2088X | GENE43X   | 0.91033935546875 |
| NODE2118X | GENE946X  | GENE1370X | 0.9102783203125  |
| NODE2119X | NODE1719X | NODE1705X | 0.909912109375   |
| NODE2120X | NODE1597X | NODE1763X | 0.90985107421875 |
| NODE2121X | NODE1725X | NODE1688X | 0.90985107421875 |
| NODE2122X | NODE2086X | NODE1714X | 0.90972900390625 |
| NODE2123X | GENE1463X | NODE1858X | 0.9090576171875  |
| NODE2124X | NODE1598X | GENE1913X | 0.90899658203125 |
| NODE2125X | NODE1841X | NODE2074X | 0.908935546875   |
| NODE2126X | GENE1505X | NODE1854X | 0.908203125      |
| NODE2127X | NODE2076X | NODE1532X | 0.90814208984375 |
| NODE2128X | NODE1835X | NODE1883X | 0.90802001953125 |
| NODE2129X | GENE1362X | GENE326X  | 0.90777587890625 |
| NODE2130X | NODE1967X | NODE1649X | 0.9075927734375  |
| NODE2131X | NODE1775X | NODE1987X | 0.9071044921875  |
| NODE2132X | NODE1331X | GENE1112X | 0.906982421875   |
| NODE2133X | NODE1958X | NODE1640X | 0.90692138671875 |
| NODE2134X | NODE1853X | NODE1963X | 0.90673828125    |
| NODE2135X | NODE1769X | GENE1033X | 0.9066162109375  |
| NODE2136X | NODE1923X | NODE1636X | 0.90655517578125 |
| NODE2137X | NODE1370X | NODE1654X | 0.90618896484375 |
| NODE2138X | NODE1912X | GENE2358X | 0.90606689453125 |
| NODE2139X | NODE1897X | NODE1547X | 0.90606689453125 |
| NODE2140X | GENE275X  | GENE915X  | 0.9052734375     |
| NODE2141X | GENE1614X | GENE645X  | 0.9049072265625  |
| NODE2142X | GENE1248X | GENE2488X | 0.90484619140625 |
| NODE2143X | NODE1584X | NODE1857X | 0.90472412109375 |
| NODE2144X | NODE2048X | NODE1959X | 0.90460205078125 |
| NODE2145X | NODE1896X | NODE1945X | 0.904541015625   |
| NODE2146X | NODE1406X | GENE2633X | 0.90447998046875 |
| NODE2147X | GENE2056X | NODE1579X | 0.90411376953125 |
| NODE2148X | NODE2040X | GENE1755X | 0.9039306640625  |
| NODE2149X | NODE1908X | GENE1265X | 0.90386962890625 |
| NODE2150X | NODE1809X | NODE1321X | 0.90374755859375 |
| NODE2151X | NODE1319X | NODE1922X | 0.9034423828125  |
| NODE2152X | NODE1788X | GENE2461X | 0.90325927734375 |
| NODE2153X | GENE1308X | GENE2465X | 0.90283203125    |
| NODE2154X | GENE1382X | NODE1588X | 0.90277099609375 |
| NODE2155X | NODE2115X | GENE1089X | 0.902587890625   |
| NODE2156X | GENE1637X | GENE2027X | 0.902099609375   |
| NODE2157X | NODE1964X | NODE1720X | 0.902099609375   |
| NODE2158X | GENE1990X | GENE137X  | 0.90185546875    |
| NODE2159X | NODE2136X | NODE1827X | 0.9013671875     |
| NODE2160X | NODE1753X | NODE1843X | 0.9010009765625  |
| NODE2161X | GENE2199X | GENE2359X | 0.90093994140625 |
| NODE2162X | NODE1899X | NODE1647X | 0.900634765625   |
| NODE2163X | NODE1834X | NODE1951X | 0.900634765625   |
| NODE2164X | GENE1402X | NODE1448X | 0.90057373046875 |
| NODE2165X | NODE1518X | NODE2020X | 0.90045166015625 |
| NODE2166X | NODE1838X | NODE2084X | 0.9002685546875  |

|           |           |           |                  |
|-----------|-----------|-----------|------------------|
| NODE2167X | NODE1888X | NODE1324X | 0.8995361328125  |
| NODE2168X | NODE1726X | NODE1014X | 0.89892578125    |
| NODE2169X | NODE1609X | NODE1924X | 0.8988037109375  |
| NODE2170X | NODE1985X | NODE1910X | 0.898681640625   |
| NODE2171X | NODE1990X | NODE1933X | 0.89825439453125 |
| NODE2172X | GENE5X    | GENE1458X | 0.8980712890625  |
| NODE2173X | NODE1940X | NODE1605X | 0.89801025390625 |
| NODE2174X | NODE1754X | NODE2032X | 0.8978271484375  |
| NODE2175X | NODE1744X | NODE1607X | 0.89776611328125 |
| NODE2176X | NODE1477X | GENE1467X | 0.89764404296875 |
| NODE2177X | NODE1730X | NODE2080X | 0.89764404296875 |
| NODE2178X | NODE1868X | NODE1638X | 0.89727783203125 |
| NODE2179X | NODE1849X | NODE2163X | 0.89727783203125 |
| NODE2180X | GENE973X  | GENE501X  | 0.897216796875   |
| NODE2181X | NODE2083X | NODE2077X | 0.89691162109375 |
| NODE2182X | NODE1837X | GENE1790X | 0.8968505859375  |
| NODE2183X | NODE1952X | NODE1973X | 0.89617919921875 |
| NODE2184X | NODE1761X | NODE1784X | 0.89599609375    |
| NODE2185X | GENE232X  | NODE1379X | 0.89593505859375 |
| NODE2186X | GENE790X  | GENE1487X | 0.8958740234375  |
| NODE2187X | NODE1943X | NODE2089X | 0.89581298828125 |
| NODE2188X | GENE2623X | NODE1537X | 0.895751953125   |
| NODE2189X | NODE1740X | NODE1717X | 0.89569091796875 |
| NODE2190X | GENE1324X | NODE1606X | 0.8956298828125  |
| NODE2191X | GENE1509X | NODE1906X | 0.89556884765625 |
| NODE2192X | GENE332X  | GENE439X  | 0.89520263671875 |
| NODE2193X | NODE1993X | NODE2034X | 0.89447021484375 |
| NODE2194X | NODE1463X | NODE1820X | 0.89404296875    |
| NODE2195X | NODE1932X | NODE1937X | 0.8935546875     |
| NODE2196X | NODE1930X | NODE1724X | 0.89306640625    |
| NODE2197X | NODE1648X | NODE1562X | 0.89300537109375 |
| NODE2198X | NODE1863X | GENE40X   | 0.89178466796875 |
| NODE2199X | GENE2129X | GENE2602X | 0.89141845703125 |
| NODE2200X | GENE779X  | GENE1239X | 0.89093017578125 |
| NODE2201X | NODE2071X | NODE1941X | 0.8907470703125  |
| NODE2202X | NODE1798X | NODE1677X | 0.890625         |
| NODE2203X | NODE1893X | NODE1813X | 0.8905029296875  |
| NODE2204X | NODE1698X | NODE1926X | 0.890380859375   |
| NODE2205X | NODE2010X | NODE2009X | 0.8896484375     |
| NODE2206X | NODE2017X | GENE2269X | 0.88934326171875 |
| NODE2207X | GENE1022X | GENE1213X | 0.8890380859375  |
| NODE2208X | NODE1995X | GENE699X  | 0.88848876953125 |
| NODE2209X | NODE1918X | GENE1445X | 0.888427734375   |
| NODE2210X | GENE1387X | GENE2151X | 0.887939453125   |
| NODE2211X | NODE1826X | NODE2058X | 0.8876953125     |
| NODE2212X | NODE1984X | NODE1239X | 0.8875732421875  |
| NODE2213X | NODE1917X | NODE1847X | 0.88665771484375 |
| NODE2214X | NODE2119X | NODE1434X | 0.8865966796875  |
| NODE2215X | GENE1514X | GENE2529X | 0.88623046875    |
| NODE2216X | NODE1819X | NODE2003X | 0.885986328125   |
| NODE2217X | GENE1159X | GENE2661X | 0.8857421875     |
| NODE2218X | GENE663X  | GENE1363X | 0.88519287109375 |
| NODE2219X | GENE2500X | NODE2140X | 0.8851318359375  |
| NODE2220X | NODE1848X | NODE1792X | 0.8848876953125  |
| NODE2221X | NODE1653X | NODE1928X | 0.88427734375    |
| NODE2222X | NODE1874X | NODE1711X | 0.88372802734375 |
| NODE2223X | NODE1981X | NODE1795X | 0.8834228515625  |

|           |           |           |                  |
|-----------|-----------|-----------|------------------|
| NODE2224X | GENE84X   | GENE1752X | 0.88336181640625 |
| NODE2225X | NODE1686X | GENE2155X | 0.88336181640625 |
| NODE2226X | NODE1997X | NODE2179X | 0.88336181640625 |
| NODE2227X | NODE1828X | NODE1384X | 0.88330078125    |
| NODE2228X | NODE1789X | GENE1860X | 0.8831787109375  |
| NODE2229X | GENE2589X | GENE139X  | 0.88311767578125 |
| NODE2230X | NODE1152X | GENE1854X | 0.88214111328125 |
| NODE2231X | GENE1412X | GENE1682X | 0.88201904296875 |
| NODE2232X | NODE1902X | NODE2066X | 0.88201904296875 |
| NODE2233X | NODE2049X | NODE1713X | 0.8818359375     |
| NODE2234X | GENE1735X | NODE1741X | 0.88165283203125 |
| NODE2235X | NODE1921X | NODE1969X | 0.88165283203125 |
| NODE2236X | NODE1768X | NODE1663X | 0.8814697265625  |
| NODE2237X | NODE1903X | NODE1920X | 0.88140869140625 |
| NODE2238X | NODE1844X | NODE1811X | 0.88128662109375 |
| NODE2239X | NODE1830X | GENE1272X | 0.88043212890625 |
| NODE2240X | GENE1732X | GENE582X  | 0.87969970703125 |
| NODE2241X | NODE1962X | NODE2201X | 0.879638671875   |
| NODE2242X | GENE1111X | GENE2443X | 0.87921142578125 |
| NODE2243X | NODE1905X | GENE2540X | 0.879150390625   |
| NODE2244X | NODE2031X | NODE2023X | 0.87908935546875 |
| NODE2245X | NODE1872X | NODE1625X | 0.87847900390625 |
| NODE2246X | NODE1935X | NODE2001X | 0.8779296875     |
| NODE2247X | GENE1459X | NODE2160X | 0.877685546875   |
| NODE2248X | GENE1700X | GENE2626X | 0.87762451171875 |
| NODE2249X | NODE2177X | NODE1808X | 0.87750244140625 |
| NODE2250X | NODE2111X | GENE1065X | 0.87750244140625 |
| NODE2251X | NODE1960X | NODE1737X | 0.877197265625   |
| NODE2252X | NODE2044X | NODE1887X | 0.8770751953125  |
| NODE2253X | NODE2143X | NODE1986X | 0.8770751953125  |
| NODE2254X | NODE1510X | NODE2047X | 0.876220703125   |
| NODE2255X | NODE1556X | NODE2157X | 0.8756103515625  |
| NODE2256X | NODE1954X | NODE1983X | 0.87518310546875 |
| NODE2257X | GENE216X  | NODE1791X | 0.8751220703125  |
| NODE2258X | NODE2149X | NODE1715X | 0.87493896484375 |
| NODE2259X | NODE1939X | NODE2223X | 0.87481689453125 |
| NODE2260X | NODE1552X | NODE1749X | 0.8743896484375  |
| NODE2261X | GENE2082X | GENE1617X | 0.87335205078125 |
| NODE2262X | NODE2145X | NODE2174X | 0.87322998046875 |
| NODE2263X | NODE2078X | NODE2190X | 0.87310791015625 |
| NODE2264X | NODE2015X | NODE2125X | 0.872802734375   |
| NODE2265X | NODE1604X | NODE1866X | 0.87237548828125 |
| NODE2266X | NODE2055X | NODE1931X | 0.8719482421875  |
| NODE2267X | NODE2030X | GENE241X  | 0.87152099609375 |
| NODE2268X | NODE1823X | NODE2097X | 0.8714599609375  |
| NODE2269X | GENE2424X | NODE2039X | 0.8709716796875  |
| NODE2270X | NODE1670X | GENE1326X | 0.87091064453125 |
| NODE2271X | NODE2175X | NODE1968X | 0.87078857421875 |
| NODE2272X | GENE1679X | GENE669X  | 0.86956787109375 |
| NODE2273X | NODE2167X | NODE1949X | 0.86944580078125 |
| NODE2274X | NODE2093X | NODE2028X | 0.8690185546875  |
| NODE2275X | NODE1938X | NODE2202X | 0.86883544921875 |
| NODE2276X | NODE2181X | NODE1263X | 0.8685302734375  |
| NODE2277X | NODE2019X | NODE2022X | 0.868408203125   |
| NODE2278X | NODE2235X | NODE2130X | 0.86822509765625 |
| NODE2279X | NODE2096X | NODE1989X | 0.86810302734375 |
| NODE2280X | NODE2060X | NODE1914X | 0.86798095703125 |



|           |           |           |                  |
|-----------|-----------|-----------|------------------|
| NODE2281X | NODE2138X | NODE2166X | 0.86737060546875 |
| NODE2282X | NODE1722X | NODE2036X | 0.8673095703125  |
| NODE2283X | NODE1913X | NODE1862X | 0.86663818359375 |
| NODE2284X | NODE2008X | GENE1995X | 0.865966796875   |
| NODE2285X | NODE2082X | NODE2169X | 0.86541748046875 |
| NODE2286X | GENE1094X | NODE2103X | 0.865234375      |
| NODE2287X | GENE641X  | NODE1566X | 0.8651123046875  |
| NODE2288X | GENE185X  | NODE1437X | 0.86492919921875 |
| NODE2289X | GENE114X  | GENE2638X | 0.8648681640625  |
| NODE2290X | NODE2092X | NODE1652X | 0.86444091796875 |
| NODE2291X | GENE687X  | NODE1900X | 0.86322021484375 |
| NODE2292X | NODE2046X | NODE2121X | 0.86322021484375 |
| NODE2293X | NODE1972X | NODE1936X | 0.86212158203125 |
| NODE2294X | NODE2063X | NODE1991X | 0.86199951171875 |
| NODE2295X | NODE2134X | NODE2277X | 0.86199951171875 |
| NODE2296X | GENE125X  | GENE2611X | 0.861328125      |
| NODE2297X | GENE2065X | NODE1865X | 0.86029052734375 |
| NODE2298X | NODE2059X | NODE2238X | 0.86029052734375 |
| NODE2299X | GENE1442X | GENE2463X | 0.86004638671875 |
| NODE2300X | GENE1243X | NODE1728X | 0.86004638671875 |
| NODE2301X | NODE2137X | NODE2232X | 0.859619140625   |
| NODE2302X | NODE2053X | NODE1956X | 0.85955810546875 |
| NODE2303X | NODE2042X | NODE1895X | 0.85931396484375 |
| NODE2304X | GENE1734X | NODE2198X | 0.8592529296875  |
| NODE2305X | GENE1449X | NODE2094X | 0.859130859375   |
| NODE2306X | NODE1978X | GENE1880X | 0.85906982421875 |
| NODE2307X | NODE1875X | NODE2227X | 0.85882568359375 |
| NODE2308X | NODE2178X | NODE2033X | 0.85870361328125 |
| NODE2309X | NODE2100X | NODE2144X | 0.85870361328125 |
| NODE2310X | NODE1950X | NODE2104X | 0.858642578125   |
| NODE2311X | NODE1776X | NODE1821X | 0.85821533203125 |
| NODE2312X | GENE209X  | NODE1927X | 0.8577880859375  |
| NODE2313X | NODE1871X | GENE1229X | 0.8572998046875  |
| NODE2314X | NODE2170X | NODE2171X | 0.85723876953125 |
| NODE2315X | GENE862X  | GENE1061X | 0.8570556640625  |
| NODE2316X | NODE2153X | NODE1884X | 0.8570556640625  |
| NODE2317X | NODE2123X | GENE1266X | 0.856689453125   |
| NODE2318X | NODE1308X | NODE1948X | 0.85638427734375 |
| NODE2319X | NODE2081X | NODE2187X | 0.85546875       |
| NODE2320X | NODE1633X | NODE1947X | 0.8548583984375  |
| NODE2321X | NODE1743X | NODE2128X | 0.8531494140625  |
| NODE2322X | NODE1587X | NODE1894X | 0.85308837890625 |
| NODE2323X | NODE2243X | NODE2013X | 0.8525390625     |
| NODE2324X | GENE1793X | GENE708X  | 0.8521728515625  |
| NODE2325X | GENE299X  | GENE804X  | 0.8492431640625  |
| NODE2326X | GENE914X  | NODE1573X | 0.84912109375    |
| NODE2327X | GENE2023X | NODE2069X | 0.84893798828125 |
| NODE2328X | NODE2209X | NODE2237X | 0.84869384765625 |
| NODE2329X | NODE1131X | NODE2038X | 0.848388671875   |
| NODE2330X | NODE2162X | NODE2131X | 0.848388671875   |
| NODE2331X | NODE2188X | GENE1899X | 0.84832763671875 |
| NODE2332X | NODE1816X | NODE1977X | 0.8482666015625  |
| NODE2333X | NODE2205X | NODE2319X | 0.84820556640625 |
| NODE2334X | NODE1831X | NODE2108X | 0.84808349609375 |
| NODE2335X | GENE1960X | NODE2035X | 0.847412109375   |
| NODE2336X | NODE1996X | NODE2037X | 0.846923828125   |
| NODE2337X | NODE2148X | GENE26X   | 0.84619140625    |

|           |           |           |                  |
|-----------|-----------|-----------|------------------|
| NODE2338X | NODE2199X | GENE770X  | 0.84619140625    |
| NODE2339X | NODE2184X | GENE849X  | 0.84552001953125 |
| NODE2340X | NODE2129X | GENE1760X | 0.84527587890625 |
| NODE2341X | NODE1639X | NODE2075X | 0.84515380859375 |
| NODE2342X | GENE622X  | NODE2065X | 0.84478759765625 |
| NODE2343X | NODE1966X | NODE2027X | 0.8447265625     |
| NODE2344X | NODE2211X | NODE2029X | 0.844482421875   |
| NODE2345X | NODE1946X | NODE1919X | 0.84295654296875 |
| NODE2346X | NODE2282X | NODE1710X | 0.84246826171875 |
| NODE2347X | NODE1794X | NODE2139X | 0.842041015625   |
| NODE2348X | NODE1812X | NODE2067X | 0.84051513671875 |
| NODE2349X | GENE399X  | NODE1925X | 0.84014892578125 |
| NODE2350X | NODE2266X | NODE2257X | 0.8394775390625  |
| NODE2351X | NODE2343X | NODE2061X | 0.83917236328125 |
| NODE2352X | NODE2146X | NODE1650X | 0.838623046875   |
| NODE2353X | GENE996X  | GENE1488X | 0.83740234375    |
| NODE2354X | NODE1736X | NODE2026X | 0.83636474609375 |
| NODE2355X | NODE2120X | NODE1709X | 0.83624267578125 |
| NODE2356X | NODE1909X | NODE1564X | 0.83624267578125 |
| NODE2357X | NODE1402X | GENE402X  | 0.8348388671875  |
| NODE2358X | NODE2004X | NODE2208X | 0.83447265625    |
| NODE2359X | NODE2206X | NODE1617X | 0.8341064453125  |
| NODE2360X | NODE2141X | NODE2212X | 0.83270263671875 |
| NODE2361X | NODE2165X | NODE1998X | 0.8323974609375  |
| NODE2362X | NODE2126X | NODE2295X | 0.83221435546875 |
| NODE2363X | NODE1974X | NODE2014X | 0.83172607421875 |
| NODE2364X | NODE2151X | NODE1661X | 0.8316650390625  |
| NODE2365X | NODE2303X | NODE2107X | 0.83160400390625 |
| NODE2366X | NODE2105X | NODE2024X | 0.83123779296875 |
| NODE2367X | NODE2122X | NODE2133X | 0.8306884765625  |
| NODE2368X | NODE1690X | NODE2268X | 0.83056640625    |
| NODE2369X | NODE2091X | NODE1557X | 0.830078125      |
| NODE2370X | GENE2650X | NODE1979X | 0.82989501953125 |
| NODE2371X | NODE2132X | NODE2110X | 0.82952880859375 |
| NODE2372X | GENE1984X | GENE1205X | 0.8294677734375  |
| NODE2373X | NODE1876X | NODE1878X | 0.8287353515625  |
| NODE2374X | GENE118X  | NODE2267X | 0.8284912109375  |
| NODE2375X | NODE1602X | NODE1592X | 0.82794189453125 |
| NODE2376X | NODE2330X | NODE2072X | 0.827880859375   |
| NODE2377X | NODE2273X | NODE2095X | 0.8270263671875  |
| NODE2378X | NODE2147X | NODE1626X | 0.82525634765625 |
| NODE2379X | NODE1782X | NODE2191X | 0.8251953125     |
| NODE2380X | GENE2120X | NODE1957X | 0.8250732421875  |
| NODE2381X | NODE2281X | NODE2127X | 0.8243408203125  |
| NODE2382X | NODE2262X | NODE1731X | 0.8240966796875  |
| NODE2383X | NODE2193X | NODE2333X | 0.8233642578125  |
| NODE2384X | NODE2285X | NODE1907X | 0.82330322265625 |
| NODE2385X | NODE2164X | NODE2264X | 0.82318115234375 |
| NODE2386X | NODE2290X | NODE2168X | 0.8223876953125  |
| NODE2387X | NODE2050X | NODE2002X | 0.8218994140625  |
| NODE2388X | NODE1800X | NODE1538X | 0.82135009765625 |
| NODE2389X | GENE1142X | NODE1999X | 0.8211669921875  |
| NODE2390X | NODE1970X | NODE2113X | 0.82061767578125 |
| NODE2391X | NODE2118X | GENE2011X | 0.82037353515625 |
| NODE2392X | NODE2247X | NODE1861X | 0.82037353515625 |
| NODE2393X | NODE2099X | NODE2298X | 0.81890869140625 |
| NODE2394X | NODE2233X | NODE1480X | 0.81878662109375 |

|           |           |           |                  |
|-----------|-----------|-----------|------------------|
| NODE2395X | NODE2070X | NODE2114X | 0.81866455078125 |
| NODE2396X | NODE2341X | NODE1976X | 0.8184814453125  |
| NODE2397X | NODE2259X | NODE2196X | 0.81793212890625 |
| NODE2398X | GENE146X  | GENE623X  | 0.8172607421875  |
| NODE2399X | NODE2258X | NODE2085X | 0.8172607421875  |
| NODE2400X | NODE2231X | NODE2054X | 0.81695556640625 |
| NODE2401X | NODE2249X | NODE2068X | 0.81695556640625 |
| NODE2402X | NODE2210X | NODE1624X | 0.81561279296875 |
| NODE2403X | GENE1532X | NODE2200X | 0.81536865234375 |
| NODE2404X | NODE2279X | NODE2241X | 0.81536865234375 |
| NODE2405X | NODE2005X | NODE2051X | 0.8145751953125  |
| NODE2406X | NODE2079X | NODE2152X | 0.8145751953125  |
| NODE2407X | NODE1953X | NODE2291X | 0.81353759765625 |
| NODE2408X | NODE2294X | NODE2064X | 0.81353759765625 |
| NODE2409X | NODE2393X | NODE2025X | 0.813232421875   |
| NODE2410X | NODE1994X | NODE2337X | 0.8123779296875  |
| NODE2411X | GENE2282X | NODE1283X | 0.81121826171875 |
| NODE2412X | GENE833X  | GENE234X  | 0.8111572265625  |
| NODE2413X | NODE2252X | NODE2256X | 0.81103515625    |
| NODE2414X | NODE2263X | GENE1282X | 0.8087158203125  |
| NODE2415X | NODE2045X | NODE2226X | 0.80859375       |
| NODE2416X | NODE2382X | NODE2253X | 0.80780029296875 |
| NODE2417X | GENE638X  | NODE2361X | 0.8077392578125  |
| NODE2418X | GENE475X  | NODE2173X | 0.80718994140625 |
| NODE2419X | NODE2311X | NODE1758X | 0.80712890625    |
| NODE2420X | GENE2341X | NODE2286X | 0.8043212890625  |
| NODE2421X | NODE1934X | NODE2310X | 0.80389404296875 |
| NODE2422X | NODE2328X | NODE2101X | 0.80352783203125 |
| NODE2423X | GENE1007X | NODE1988X | 0.80291748046875 |
| NODE2424X | NODE2270X | NODE2156X | 0.80291748046875 |
| NODE2425X | NODE2043X | NODE2052X | 0.8026123046875  |
| NODE2426X | GENE1663X | NODE2324X | 0.80230712890625 |
| NODE2427X | NODE2073X | NODE1880X | 0.80224609375    |
| NODE2428X | NODE1929X | GENE2102X | 0.80169677734375 |
| NODE2429X | NODE2348X | NODE2225X | 0.80126953125    |
| NODE2430X | NODE2194X | NODE2150X | 0.80059814453125 |
| NODE2431X | NODE2269X | NODE2309X | 0.800537109375   |
| NODE2432X | NODE2183X | NODE2307X | 0.8004150390625  |
| NODE2433X | NODE2102X | NODE2302X | 0.7999267578125  |
| NODE2434X | NODE2189X | NODE1961X | 0.7998046875     |
| NODE2435X | GENE1302X | GENE1660X | 0.79888916015625 |
| NODE2436X | NODE2356X | GENE1772X | 0.79852294921875 |
| NODE2437X | NODE2159X | NODE2246X | 0.79730224609375 |
| NODE2438X | GENE573X  | NODE2342X | 0.7969970703125  |
| NODE2439X | NODE1394X | NODE2203X | 0.79571533203125 |
| NODE2440X | NODE1911X | NODE2357X | 0.795654296875   |
| NODE2441X | NODE2284X | NODE1881X | 0.795166015625   |
| NODE2442X | NODE2018X | NODE2217X | 0.79510498046875 |
| NODE2443X | NODE2288X | NODE2335X | 0.79296875       |
| NODE2444X | NODE2306X | GENE276X  | 0.79168701171875 |
| NODE2445X | NODE2260X | NODE2172X | 0.7913818359375  |
| NODE2446X | NODE2265X | NODE2327X | 0.790771484375   |
| NODE2447X | NODE2292X | NODE2314X | 0.7896728515625  |
| NODE2448X | NODE2213X | NODE2375X | 0.7894287109375  |
| NODE2449X | NODE2176X | NODE1739X | 0.7880859375     |
| NODE2450X | NODE2254X | NODE2287X | 0.7860107421875  |
| NODE2451X | NODE2142X | NODE2239X | 0.7852783203125  |

|           |           |           |                  |
|-----------|-----------|-----------|------------------|
| NODE2452X | NODE2220X | NODE2305X | 0.784423828125   |
| NODE2453X | NODE2222X | NODE2214X | 0.783935546875   |
| NODE2454X | NODE2195X | NODE2278X | 0.78253173828125 |
| NODE2455X | NODE2379X | NODE2057X | 0.78192138671875 |
| NODE2456X | NODE2087X | NODE1126X | 0.781494140625   |
| NODE2457X | NODE2345X | NODE2293X | 0.78057861328125 |
| NODE2458X | NODE2387X | NODE2430X | 0.7791748046875  |
| NODE2459X | GENE682X  | NODE2316X | 0.77471923828125 |
| NODE2460X | GENE1998X | GENE131X  | 0.7724609375     |
| NODE2461X | GENE569X  | NODE2116X | 0.77008056640625 |
| NODE2462X | NODE2350X | NODE2161X | 0.76983642578125 |
| NODE2463X | NODE2180X | NODE2313X | 0.76947021484375 |
| NODE2464X | NODE1359X | NODE2228X | 0.76812744140625 |
| NODE2465X | NODE2365X | NODE2280X | 0.76629638671875 |
| NODE2466X | NODE2062X | GENE334X  | 0.76556396484375 |
| NODE2467X | NODE2366X | NODE2344X | 0.76416015625    |
| NODE2468X | NODE2412X | NODE2403X | 0.76409912109375 |
| NODE2469X | NODE2355X | NODE2299X | 0.7625732421875  |
| NODE2470X | NODE2204X | NODE2090X | 0.7620849609375  |
| NODE2471X | NODE2109X | GENE1537X | 0.7611083984375  |
| NODE2472X | NODE2354X | NODE2274X | 0.76080322265625 |
| NODE2473X | NODE2296X | NODE1657X | 0.76043701171875 |
| NODE2474X | GENE893X  | NODE2155X | 0.7601318359375  |
| NODE2475X | GENE1339X | GENE735X  | 0.75970458984375 |
| NODE2476X | NODE2098X | NODE2245X | 0.75958251953125 |
| NODE2477X | NODE2417X | NODE2283X | 0.7584228515625  |
| NODE2478X | NODE2276X | NODE2415X | 0.7581787109375  |
| NODE2479X | NODE2229X | NODE1257X | 0.75628662109375 |
| NODE2480X | NODE2308X | NODE2385X | 0.7550048828125  |
| NODE2481X | NODE2271X | NODE2454X | 0.75433349609375 |
| NODE2482X | NODE2304X | NODE2416X | 0.7540283203125  |
| NODE2483X | NODE2339X | GENE860X  | 0.75372314453125 |
| NODE2484X | NODE2251X | NODE2406X | 0.75201416015625 |
| NODE2485X | NODE2367X | NODE2301X | 0.75103759765625 |
| NODE2486X | NODE2216X | NODE2401X | 0.75042724609375 |
| NODE2487X | NODE2158X | NODE2297X | 0.7503662109375  |
| NODE2488X | NODE2041X | NODE2358X | 0.75006103515625 |
| NODE2489X | GENE346X  | NODE1371X | 0.7493896484375  |
| NODE2490X | GENE449X  | NODE1980X | 0.7489013671875  |
| NODE2491X | NODE2408X | NODE2359X | 0.7471923828125  |
| NODE2492X | NODE2106X | NODE2377X | 0.74627685546875 |
| NODE2493X | NODE2376X | NODE2383X | 0.74554443359375 |
| NODE2494X | NODE2397X | NODE2418X | 0.74542236328125 |
| NODE2495X | NODE2351X | NODE2347X | 0.7431640625     |
| NODE2496X | NODE2236X | GENE511X  | 0.73919677734375 |
| NODE2497X | NODE2371X | NODE2317X | 0.736572265625   |
| NODE2498X | NODE2363X | NODE2446X | 0.7337646484375  |
| NODE2499X | NODE2336X | NODE2447X | 0.72808837890625 |
| NODE2500X | GENE2610X | NODE2242X | 0.7279052734375  |
| NODE2501X | NODE2219X | NODE2244X | 0.72747802734375 |
| NODE2502X | NODE1771X | NODE2275X | 0.726806640625   |
| NODE2503X | NODE2362X | NODE2384X | 0.7255859375     |
| NODE2504X | NODE2250X | NODE2491X | 0.7255859375     |
| NODE2505X | GENE1971X | NODE2322X | 0.72515869140625 |
| NODE2506X | NODE2439X | NODE1992X | 0.7247314453125  |
| NODE2507X | NODE2334X | NODE2240X | 0.723876953125   |
| NODE2508X | NODE2391X | NODE2442X | 0.72247314453125 |

|           |           |           |                  |
|-----------|-----------|-----------|------------------|
| NODE2509X | NODE2321X | NODE2422X | 0.71685791015625 |
| NODE2510X | NODE2451X | NODE2124X | 0.71600341796875 |
| NODE2511X | NODE2230X | NODE2488X | 0.7152099609375  |
| NODE2512X | NODE2437X | NODE2404X | 0.71478271484375 |
| NODE2513X | NODE2399X | NODE2458X | 0.71380615234375 |
| NODE2514X | NODE2506X | NODE2112X | 0.7127685546875  |
| NODE2515X | NODE2323X | NODE2221X | 0.71240234375    |
| NODE2516X | NODE2389X | NODE2470X | 0.709716796875   |
| NODE2517X | NODE2312X | NODE2329X | 0.708740234375   |
| NODE2518X | NODE2444X | NODE2207X | 0.70855712890625 |
| NODE2519X | NODE2315X | NODE2411X | 0.7066650390625  |
| NODE2520X | NODE2154X | NODE2436X | 0.70556640625    |
| NODE2521X | NODE2370X | NODE2373X | 0.70367431640625 |
| NODE2522X | NODE2460X | NODE2007X | 0.70367431640625 |
| NODE2523X | NODE2450X | NODE2493X | 0.70269775390625 |
| NODE2524X | NODE2395X | NODE2369X | 0.70135498046875 |
| NODE2525X | NODE2289X | NODE2185X | 0.7003173828125  |
| NODE2526X | NODE2381X | NODE2478X | 0.69921875       |
| NODE2527X | NODE2135X | NODE2465X | 0.69476318359375 |
| NODE2528X | NODE2380X | GENE583X  | 0.694580078125   |
| NODE2529X | NODE2413X | NODE2453X | 0.6923828125     |
| NODE2530X | NODE2197X | NODE2386X | 0.690673828125   |
| NODE2531X | NODE2390X | NODE2186X | 0.690185546875   |
| NODE2532X | NODE2432X | NODE2424X | 0.6884765625     |
| NODE2533X | NODE2224X | NODE2261X | 0.68804931640625 |
| NODE2534X | NODE2182X | GENE2400X | 0.68768310546875 |
| NODE2535X | NODE2427X | NODE2332X | 0.68695068359375 |
| NODE2536X | GENE706X  | NODE2405X | 0.68255615234375 |
| NODE2537X | NODE2255X | NODE2486X | 0.68145751953125 |
| NODE2538X | NODE2462X | NODE2352X | 0.67889404296875 |
| NODE2539X | NODE2461X | NODE2452X | 0.67724609375    |
| NODE2540X | GENE558X  | NODE2326X | 0.677001953125   |
| NODE2541X | NODE2117X | NODE2421X | 0.6768798828125  |
| NODE2542X | NODE2513X | NODE2364X | 0.67547607421875 |
| NODE2543X | NODE2320X | NODE2499X | 0.66790771484375 |
| NODE2544X | NODE2433X | NODE2378X | 0.66650390625    |
| NODE2545X | GENE1384X | NODE2480X | 0.6634521484375  |
| NODE2546X | NODE2248X | GENE333X  | 0.65582275390625 |
| NODE2547X | NODE2338X | NODE2531X | 0.65496826171875 |
| NODE2548X | NODE2477X | NODE2492X | 0.65289306640625 |
| NODE2549X | NODE2215X | GENE156X  | 0.65234375       |
| NODE2550X | NODE2483X | NODE2272X | 0.647705078125   |
| NODE2551X | NODE2503X | NODE2482X | 0.64739990234375 |
| NODE2552X | NODE2467X | NODE2509X | 0.644287109375   |
| NODE2553X | NODE2394X | NODE2441X | 0.6439208984375  |
| NODE2554X | NODE2481X | NODE2512X | 0.641357421875   |
| NODE2555X | NODE2423X | NODE2501X | 0.6395263671875  |
| NODE2556X | NODE2448X | NODE2459X | 0.63812255859375 |
| NODE2557X | NODE2484X | NODE2318X | 0.6243896484375  |
| NODE2558X | NODE2400X | NODE2431X | 0.62432861328125 |
| NODE2559X | NODE2494X | NODE2495X | 0.6234130859375  |
| NODE2560X | NODE2505X | NODE2396X | 0.62322998046875 |
| NODE2561X | NODE2456X | NODE2410X | 0.62255859375    |
| NODE2562X | NODE2443X | NODE2425X | 0.6201171875     |
| NODE2563X | NODE2300X | NODE2340X | 0.6187744140625  |
| NODE2564X | NODE2502X | NODE2541X | 0.6185302734375  |
| NODE2565X | NODE2476X | NODE2434X | 0.61285400390625 |

|           |           |           |                  |
|-----------|-----------|-----------|------------------|
| NODE2566X | NODE2474X | NODE2532X | 0.60955810546875 |
| NODE2567X | NODE2392X | NODE2543X | 0.60943603515625 |
| NODE2568X | NODE2428X | NODE2525X | 0.606689453125   |
| NODE2569X | NODE2530X | NODE2346X | 0.6053466796875  |
| NODE2570X | NODE2556X | GENE386X  | 0.599853515625   |
| NODE2571X | NODE2472X | NODE2414X | 0.59808349609375 |
| NODE2572X | NODE2435X | NODE2473X | 0.59423828125    |
| NODE2573X | NODE2419X | NODE2471X | 0.59197998046875 |
| NODE2574X | NODE2438X | NODE2192X | 0.5863037109375  |
| NODE2575X | NODE2440X | NODE2349X | 0.5855712890625  |
| NODE2576X | NODE2500X | GENE2101X | 0.584716796875   |
| NODE2577X | NODE2485X | NODE2529X | 0.5845947265625  |
| NODE2578X | NODE2368X | NODE2545X | 0.58123779296875 |
| NODE2579X | GENE951X  | GENE729X  | 0.5804443359375  |
| NODE2580X | NODE2402X | NODE2508X | 0.577392578125   |
| NODE2581X | NODE2551X | NODE2523X | 0.57574462890625 |
| NODE2582X | NODE2388X | NODE2537X | 0.5721435546875  |
| NODE2583X | NODE2479X | NODE2420X | 0.57135009765625 |
| NODE2584X | NODE2429X | NODE2511X | 0.5673828125     |
| NODE2585X | NODE2526X | NODE2554X | 0.56317138671875 |
| NODE2586X | NODE2353X | GENE96X   | 0.5623779296875  |
| NODE2587X | NODE2409X | NODE2504X | 0.560546875      |
| NODE2588X | NODE2463X | NODE2496X | 0.55517578125    |
| NODE2589X | NODE2407X | NODE2516X | 0.5531005859375  |
| NODE2590X | NODE2497X | NODE2510X | 0.54595947265625 |
| NODE2591X | NODE2445X | NODE2521X | 0.5399169921875  |
| NODE2592X | NODE2469X | NODE2542X | 0.53875732421875 |
| NODE2593X | NODE2457X | NODE2553X | 0.53460693359375 |
| NODE2594X | NODE2331X | NODE2560X | 0.5240478515625  |
| NODE2595X | NODE2372X | NODE2449X | 0.52276611328125 |
| NODE2596X | NODE2088X | NODE2552X | 0.52203369140625 |
| NODE2597X | NODE2565X | NODE2559X | 0.51483154296875 |
| NODE2598X | NODE2374X | NODE2571X | 0.5032958984375  |
| NODE2599X | NODE2515X | NODE2546X | 0.501220703125   |
| NODE2600X | NODE2535X | NODE2325X | 0.49993896484375 |
| NODE2601X | NODE2544X | NODE2577X | 0.49407958984375 |
| NODE2602X | NODE2538X | NODE2561X | 0.4827880859375  |
| NODE2603X | NODE2575X | NODE2475X | 0.47991943359375 |
| NODE2604X | NODE2564X | GENE1964X | 0.479248046875   |
| NODE2605X | NODE2582X | NODE2558X | 0.47711181640625 |
| NODE2606X | NODE2234X | NODE2507X | 0.46441650390625 |
| NODE2607X | NODE2466X | NODE2218X | 0.46246337890625 |
| NODE2608X | NODE2468X | NODE2455X | 0.46014404296875 |
| NODE2609X | NODE2527X | NODE2522X | 0.451416015625   |
| NODE2610X | NODE2583X | NODE2528X | 0.45025634765625 |
| NODE2611X | NODE2599X | NODE2490X | 0.4493408203125  |
| NODE2612X | NODE2549X | NODE2426X | 0.4415283203125  |
| NODE2613X | NODE2518X | GENE2673X | 0.4381103515625  |
| NODE2614X | NODE2557X | NODE2591X | 0.437744140625   |
| NODE2615X | NODE2567X | NODE2581X | 0.42987060546875 |
| NODE2616X | NODE2547X | NODE2587X | 0.42413330078125 |
| NODE2617X | NODE2539X | NODE2517X | 0.42254638671875 |
| NODE2618X | NODE2570X | NODE2524X | 0.4163818359375  |
| NODE2619X | NODE2584X | NODE2360X | 0.4010009765625  |
| NODE2620X | NODE2562X | NODE2576X | 0.39263916015625 |
| NODE2621X | NODE2534X | NODE2519X | 0.39019775390625 |
| NODE2622X | NODE2514X | NODE2615X | 0.38885498046875 |

|           |           |           |                   |
|-----------|-----------|-----------|-------------------|
| NODE2623X | NODE2520X | NODE2533X | 0.38421630859375  |
| NODE2624X | NODE2566X | NODE2594X | 0.37738037109375  |
| NODE2625X | NODE2540X | NODE2598X | 0.376708984375    |
| NODE2626X | NODE2555X | NODE2586X | 0.360595703125    |
| NODE2627X | NODE2548X | NODE2596X | 0.36029052734375  |
| NODE2628X | NODE2604X | NODE2585X | 0.347412109375    |
| NODE2629X | NODE2498X | NODE2601X | 0.32757568359375  |
| NODE2630X | NODE2622X | NODE2578X | 0.318115234375    |
| NODE2631X | NODE2607X | NODE2573X | 0.31695556640625  |
| NODE2632X | NODE2623X | NODE2579X | 0.3160400390625   |
| NODE2633X | NODE2580X | NODE2550X | 0.30645751953125  |
| NODE2634X | NODE2489X | NODE2563X | 0.3062744140625   |
| NODE2635X | NODE2625X | NODE2568X | 0.3045654296875   |
| NODE2636X | NODE2590X | NODE2606X | 0.29412841796875  |
| NODE2637X | NODE2602X | NODE2616X | 0.287353515625    |
| NODE2638X | NODE2536X | NODE2619X | 0.26751708984375  |
| NODE2639X | NODE2592X | NODE2593X | 0.2327880859375   |
| NODE2640X | NODE2637X | NODE2569X | 0.2236328125      |
| NODE2641X | NODE2595X | GENE1501X | 0.21966552734375  |
| NODE2642X | NODE2597X | NODE2618X | 0.2193603515625   |
| NODE2643X | NODE2574X | NODE2621X | 0.20513916015625  |
| NODE2644X | NODE2603X | NODE2600X | 0.18243408203125  |
| NODE2645X | NODE2613X | NODE2627X | 0.1639404296875   |
| NODE2646X | NODE2487X | NODE2641X | 0.16314697265625  |
| NODE2647X | NODE2628X | NODE2639X | 0.15191650390625  |
| NODE2648X | NODE2572X | NODE2398X | 0.14794921875     |
| NODE2649X | NODE2609X | NODE2635X | 0.13702392578125  |
| NODE2650X | NODE2610X | NODE2589X | 0.1234130859375   |
| NODE2651X | NODE2645X | NODE2605X | 0.09375           |
| NODE2652X | NODE2624X | NODE2464X | 0.0877685546875   |
| NODE2653X | NODE2642X | NODE2612X | 0.06695556640625  |
| NODE2654X | NODE2653X | NODE2611X | -0.04010009765625 |
| NODE2655X | NODE2629X | NODE2626X | -0.0577392578125  |
| NODE2656X | NODE2588X | NODE2636X | -0.07440185546875 |
| NODE2657X | NODE2617X | NODE2614X | -0.0906982421875  |
| NODE2658X | NODE2652X | NODE2630X | -0.10284423828125 |
| NODE2659X | NODE2648X | NODE2631X | -0.12408447265625 |
| NODE2660X | NODE2633X | NODE2650X | -0.12548828125    |
| NODE2661X | NODE2647X | NODE2644X | -0.1834716796875  |
| NODE2662X | NODE2638X | NODE2658X | -0.1927490234375  |
| NODE2663X | NODE2620X | NODE2608X | -0.2757568359375  |
| NODE2664X | NODE2655X | NODE2640X | -0.322021484375   |
| NODE2665X | NODE2657X | NODE2651X | -0.32318115234375 |
| NODE2666X | NODE2632X | NODE2643X | -0.4000244140625  |
| NODE2667X | NODE2634X | NODE2646X | -0.4688720703125  |
| NODE2668X | NODE2656X | NODE2662X | -0.50665283203125 |
| NODE2669X | NODE2661X | NODE2664X | -0.54986572265625 |
| NODE2670X | NODE2660X | NODE2666X | -0.63372802734375 |
| NODE2671X | NODE2663X | NODE2668X | -0.66546630859375 |
| NODE2672X | NODE2654X | NODE2669X | -0.7342529296875  |
| NODE2673X | NODE2649X | NODE2665X | -0.78765869140625 |
| NODE2674X | NODE2672X | NODE2659X | -0.8460693359375  |
| NODE2675X | NODE2667X | NODE2673X | -0.868896484375   |
| NODE2676X | NODE2670X | NODE2671X | -0.92498779296875 |
| NODE2677X | NODE2675X | NODE2676X | -0.986328125      |
| NODE2678X | NODE2674X | NODE2677X | -0.9991455078125  |
