# Supplementary material
Source: PubMed Central journal article supplement (PMC141204)
Supplement: plntcell_15_2_317__8.pdf [file plntcell_15_2_317__8.pdf]

|         |         |         |                  |
|---------|---------|---------|------------------|
| NODE1X  | ARRY22X | ARRY23X | 0.95831298828125 |
| NODE2X  | ARRY14X | ARRY15X | 0.93255615234375 |
| NODE3X  | ARRY16X | ARRY17X | 0.93157958984375 |
| NODE4X  | ARRY12X | ARRY13X | 0.9173583984375  |
| NODE5X  | ARRY0X  | ARRY1X  | 0.908203125      |
| NODE6X  | ARRY10X | ARRY11X | 0.8948974609375  |
| NODE7X  | ARRY19X | ARRY20X | 0.89300537109375 |
| NODE8X  | NODE6X  | NODE2X  | 0.85009765625    |
| NODE9X  | NODE1X  | ARRY24X | 0.84600830078125 |
| NODE10X | NODE4X  | NODE3X  | 0.83447265625    |
| NODE11X | NODE8X  | NODE10X | 0.8275146484375  |
| NODE12X | ARRY18X | NODE7X  | 0.80743408203125 |
| NODE13X | ARRY5X  | ARRY6X  | 0.80718994140625 |
| NODE14X | ARRY2X  | ARRY3X  | 0.79150390625    |
| NODE15X | ARRY7X  | NODE5X  | 0.7791748046875  |
| NODE16X | ARRY27X | ARRY28X | 0.75732421875    |
| NODE17X | ARRY21X | NODE9X  | 0.74609375       |
| NODE18X | NODE15X | NODE14X | 0.70904541015625 |
| NODE19X | NODE17X | ARRY25X | 0.6932373046875  |
| NODE20X | ARRY4X  | NODE18X | 0.6805419921875  |
| NODE21X | ARRY29X | ARRY30X | 0.67938232421875 |
| NODE22X | ARRY8X  | NODE12X | 0.673095703125   |
| NODE23X | ARRY26X | NODE16X | 0.6671142578125  |
| NODE24X | NODE11X | ARRY9X  | 0.55389404296875 |
| NODE25X | NODE22X | NODE19X | 0.5177001953125  |
| NODE26X | NODE24X | NODE20X | 0.431396484375   |
| NODE27X | NODE25X | NODE23X | 0.35076904296875 |
| NODE28X | NODE26X | NODE13X | 0.22857666015625 |
| NODE29X | NODE27X | NODE21X | 0.20526123046875 |
| NODE30X | NODE28X | NODE29X | -0.04541015625   |
