# Supplementary material
Source: PubMed Central journal article supplement (PMC141204)
Supplement: plntcell_15_2_317__9.pdf [file plntcell_15_2_317__9.pdf]

| GID       | probeset_id | NAME       | GWEIGHT | ndr1 Pst/avrB 6h | ndr1 Pst/avrB 9h | NahG Pst/avrB 9h | NahG Pst/avrB 6h | WT Pst/avrB 6h | WT Pst/avrRpt2 6h | WT Pst/avrB 9h | WT Pst/avrRpt2 9h | WT Pst 6h | NahG Pst 9h | NahG Pst 6h | ndr1 Pst 9h | ndr1 Pst/avrRpt2 9h | ndr1 Pst 6h | ndr1 Pst/avrRpt2 6h | NahG Psp 6h | ndr1 Pst/avrB 3h | NahG Pst/avrB 3h | WT Psp 6h | WT Pst/avrB 3h | WT Pst/avrRpt2 3h | WT Pst 3h | WT Psp 3h | NahG Psp 3h | NahG Pst/avrRpt2 3h | NahG Pst 3h | ndr1 Pst/avrRpt2 3h | ndr1 Pst 3h |       |       |       |       |   |   |   |   |   |   |
|-----------|-------------|------------|---------|------------------|------------------|------------------|------------------|----------------|-------------------|----------------|-------------------|-----------|-------------|-------------|-------------|---------------------|-------------|---------------------|-------------|------------------|------------------|-----------|----------------|-------------------|-----------|-----------|-------------|---------------------|-------------|---------------------|-------------|-------|-------|-------|-------|---|---|---|---|---|---|
| AID       | ARRY13X     | ARRY16X    | ARRY17X | ARRY9X           | ARRY4X           | ARRY7X           | ARRY0X           | ARRY1X         | ARRY2X            | ARRY3X         | ARRY5X            | ARRY6X    | ARRY8X      | ARRY18X     | ARRY19X     | ARRY20X             | ARRY21X     | ARRY22X             | ARRY23X     | ARRY24X          | ARRY25X          | ARRY26X   | ARRY27X        | ARRY28X           | ARRY29X   | ARRY30X   | EWEIGHT     | 1                   | 1           | 1                   | 1           | 1     | 1     | 1     | 1     | 1 | 1 | 1 | 1 | 1 | 1 |
| GENE2630X | 14097_at    | 14097_at   | 1       | 2.1              | 3.89             | 3.34             | 3.66             | 2.4            | 0.5               | 3.12           | 2.19              | 0         | 1.09        | 0.16        | 1.47        | 1.24                | 1.88        | 1.07                | -0.71       | -0.62            | -0.35            | -         | 0.97           | 1.07              | 0.53      | 0.33      | 1.74        | 1.39                | 1.74        | 0                   | -0.71       | -0.57 | 0.4   | 0.26  | 1     |   |   |   |   |   |   |
| GENE2629X | 15662_s_at  | 15662_s_at | 1       | 1.59             | 1.86             | 2.17             | 2.44             | 1.87           | -0.32             | 1.94           | 0.36              | 0.12      | 0.32        | -0.12       | 0.2         | 0.38                | 0.49        | -0.15               | -0.43       | -0.91            | -0.15            | -         | 0.86           | 0.08              | -0.2      | -0.39     | 0.36        | 0.33                | 0.29        | 0.22                | -0.34       | -0.47 | -0.2  | -0.28 | 0.04  |   |   |   |   |   |   |
| GENE2628X | 17484_at    | 17484_at   | 1       | 2.2              | 4.67             | 4.97             | 2.8              | 3.48           | 2                 | 5.24           | 4.52              | 0         | 0           | -1.39       | 0           | 0.26                | 2.37        | 3.03                | 0           | 0                | -1.39            | -         | 1.39           | 0                 | 0         | 0         | 0           | 0                   | 0           | -0.26               | 0           | 0     | 0     | 0     | 0     |   |   |   |   |   |   |
| GENE2627X | 12574_at    | 12574_at   | 1       | 0.26             | 2.32             | 5.45             | 1.84             | 1.84           | 0                 | 4.6            | 2.72              | 0         | 0.26        | 0           | 0           | 0                   | 1.26        | 1.58                | 0           | 0                | 0                | 0         | 0              | 0                 | 0         | 0         | 0           | 0                   | 0           | 0                   | 0           | 0     | 0     | 0     | 0     | 0 |   |   |   |   |   |
| GENE2626X | 16859_at    | 16859_at   | 1       | -0.26            | 3.17             | 2.84             | 1.51             | 1.26           | 0.26              | 3.48           | 1.76              | 0         | -0.26       | 0.18        | 0.26        | 0.67                | 1.26        | -0.26               | -0.26       | -0.26            | -0.49            | -         | 0.49           | -0.26             | 0.48      | 0         | 0           | 0                   | 0           | 0                   | 0           | 0     | 0     | 0     | 0     | 0 | 0 |   |   |   |   |
| GENE2618X | 12521_at    | 12521_at   | 1       | 1.98             | 2.85             | 2.81             | 3.25             | 2.61           | 0.21              | 2.91           | 1.32              | 1.35      | 0.75        | 0.35        | 0.69        | 0.48                | 1.78        | 1.35                | 0.18        | 0.43             | 1                | 0.92      | 0.89           | 1.22              | -0.37     | -0.07     | -1.08       | 0                   | -1.28       | 0.33                | -0.28       | 0.6   | -0.45 | 0.84  |       |   |   |   |   |   |   |
| GENE2617X | 20572_at    | 20572_at   | 1       | 2.32             | 1.73             | 2.15             | 2.45             | 2.61           | 0                 | 2.78           | 2.08              | 0.08      | -0.1        | -0.34       | -0.3        | -0.3                | 0.58        | 0.08                | 1.06        | 1                | -0.34            | -         | 0.07           | -0.26             | 0.5       | -0.3      | 0.21        | 0.21                | 0           | -0.51               | 0.68        | 0     | 0.6   | 0.07  | 0.41  |   |   |   |   |   |   |
| GENE2616X | 16545_s_at  | 16545_s_at | 1       | 1.48             | 1.49             | 3.27             | 2.23             | 2.51           | 0.09              | 3.13           | 1.61              | 0.58      | -0.51       | -0.18       | 0           | 0.16                | 0.58        | 0.2                 | 0.26        | -0.21            | 0.07             | -         | 0.08           | -0.25             | 0.11      | 0.43      | 0.26        | 0.13                | -1          | 0.15                | 0.41        | 0.41  | 0.65  | 0.29  | 0.2   |   |   |   |   |   |   |
| GENE2615X | 20096_at    | 20096_at   | 1       | 2.36             | 3.18             | 2.8              | 3.27             | 3.09           | 0.86              | 3.22           | 2.95              | 1.25      | 1           | 0.61        | 1.45        | 1.39                | 2.25        | 0.73                | 0.2         | 0.16             | 0.45             | 0.07      | -0.62          | 1.07              | 0.51      | 0.41      | 0.17        | 0.21                | 0.73        | 0.79                | 0.38        | 0.21  | -0.08 | 0.31  |       |   |   |   |   |   |   |
| GENE2614X | 18109_s_at  | 18109_s_at | 1       | 1.39             | 2.39             | 2.87             | 2.8              | 2.72           | 1.2               | 3.23           | 2.63              | 1.02      | 1.01        | 0.74        | 0.8         | 1.07                | 1.79        | 1.26                | 0.01        | -0.05            | 0.33             | -         | 0.07           | -0.43             | 0.37      | 0.64      | 0.16        | 0.13                | 0.16        | 0.41                | 0.78        | 0.13  | 0     | 0     | -0.12 |   |   |   |   |   |   |
| GENE2613X | 15161_s_at  | 15161_s_at | 1       | 1.76             | 3.24             | 2.91             | 3.41             | 2.74           | 0.35              | 3.03           | 2.08              | 1.09      | 0.5         | 1           | 1.13        | 1.29                | 1.95        | 1.18                | 0.13        | -0.51            | 0.87             | -         | 0.26           | -0.49             | 0         | 0.5       | -0.86       | -0.59               | 0.28        | 0                   | 0.84        | 0.26  | 0     | 0     | 0     |   |   |   |   |   |   |
| GENE2612X | 20641_at    | 20641_at   | 1       | 2.14             | 4.28             | 4.94             | 4.77             | 2.96           | 1                 | 4.32           | 3.86              | 1.13      | 3.07        | 0           | 1           | 0.58                | 2.07        | 2.07                | -0.78       | -1.28            | 0                | 0         | 0.26           | 1.48              | 0         | 0         | 0           | 0                   | 0           | 0.84                | 0           | 1.26  | 0.26  | 1.58  |       |   |   |   |   |   |   |

|           |            |            |       |       |       |       |       |       |       |       |       |       |      |
|-----------|------------|------------|-------|-------|-------|-------|-------|-------|-------|-------|-------|-------|------|
| GENE2611X | 14503_at   | 14503_at   | 1     | 0.46  | 1.07  | 1.15  | 1.17  | 0.63  | 0.11  |       |       |       |      |
|           | 1.07       | 0.9        | -0.08 | 0.23  | 0.11  | 0.33  | 0.52  | 0.16  | 0.26  | -0.08 | -0.37 | 0.11  | -    |
|           | 0.18       | -0.32      | 0.29  | -0.18 | 0.13  | -0.1  | -0.21 | -0.08 | 0.17  | 0.08  | -0.15 | 0.35  | 0    |
| GENE2610X | 15058_s_at | 15058_s_at | 1     | 0.8   | 1.02  | 1.87  | 1.15  | 1.41  | 0.11  |       |       |       |      |
|           | 1.84       | 0.72       | 0.23  | 0.48  | -0.1  | 0.2   | 0.33  | 0.72  | 0.69  | -0.02 | -0.21 | -0.08 | -    |
|           | 0.37       | -0.68      | 0.2   | -0.05 | -0.45 | -0.51 | -0.55 | -0.57 | 0.47  | 0.33  | 0.26  | 0.11  | 0.13 |
| GENE2609X | 13242_at   | 13242_at   | 1     | 1.13  | 0.82  | 1.7   | 1.5   | 0.97  | 0.16  |       |       |       |      |
|           | 1.65       | 0.65       | 0.09  | 0.52  | 0.08  | 0.23  | 0.34  | 0.8   | 0.71  | 0     | 0.04  | 0.26  | -    |
|           | 0.47       | -0.23      | 0.25  | -0.26 | -0.32 | -0.2  | -0.35 | -0.23 | 0.37  | 0.34  | 0.26  | 0.07  | 0.13 |
| GENE2649X | 14461_at   | 14461_at   | 1     | 2.63  | 1.58  | 5.31  | 5.77  | 4.51  | 2.48  |       |       |       |      |
|           | 3.58       | 1.67       | 0     | -0.26 | 0     | 0     | 0     | 1.66  | 0     | 0     | 0     | 1     |      |
|           | 1.76       | 0          | 1.37  | 0.84  | 1.26  | 0     | 0     | 0     | 0     | 0     | 0     | 0     | 0    |
| GENE2648X | 20224_at   | 20224_at   | 1     | 2.51  | 1.82  | 1.98  | 3.32  | 2.92  | 1.76  |       |       |       |      |
|           | 2.34       | 1.51       | 0.48  | -1    | 0.16  | -0.25 | 0.15  | 0.28  | 0     | 0.05  | -0.13 | 1.24  | 1    |
|           | 0.18       | 0.02       | 1.22  | 0.09  | 0.22  | 0.04  | -0.07 | -0.21 | -0.26 | -0.3  | 0.02  | 0.43  |      |
| GENE2647X | 19257_s_at | 19257_s_at | 1     | 3     | 1.51  | 2.67  | 1.76  | 1.7   | 1.85  |       |       |       |      |
|           | 1.15       | 1.67       | 0.08  | 0     | 0     | -1.32 | 0     | 0.04  | 0.48  | 0     | 0     | 0.67  |      |
|           | 1.13       | 0          | 0     | 1     | -0.18 | -0.18 | -0.37 | 0     | 0     | 0     | 0.48  | 0     | 0    |
| GENE2646X | 15162_at   | 15162_at   | 1     | 2.96  | 1.79  | 5.18  | 4.35  | 1.74  | 0.31  |       |       |       |      |
|           | 3.13       | 1.86       | 0.25  | -0.2  | 1     | -0.35 | -0.57 | 0.53  | 0     | 0.67  | 1.07  | 1.92  |      |
|           | 1.26       | -1.88      | 0     | 0.74  | 0     | -0.25 | 0.5   | 0.82  | 0     | 1.48  | 0     | -1.88 | -    |
|           | 0.47       |            |       |       |       |       |       |       |       |       |       |       |      |
| GENE2666X | 18888_at   | 18888_at   | 1     | 1.48  | 2.4   | 5.57  | 2.96  | 2.76  | 1.26  |       |       |       |      |
|           | 4.7        | 3.2        | 0     | 0.26  | 0     | 1.27  | 0.88  | 2.43  | 3.07  | 0     | 1.13  | 0     |      |
|           | 1.26       | 1.58       | 0.52  | 0     | 2.26  | 2.07  | 1.92  | 0.32  | -0.86 | -0.18 | -0.86 | 0.26  | 0    |
| GENE2665X | 13004_at   | 13004_at   | 1     | 1.05  | 1.35  | 1.84  | 1.22  | 1.25  | 1.08  |       |       |       |      |
|           | 1.79       | 1.81       | 0.2   | 0.65  | -0.15 | 0.01  | 0.07  | 0.9   | 0.79  | -0.53 | 0.12  | 0.05  |      |
|           | 0.51       | 0.6        | 0.33  | 0.68  | 0.55  | 0.58  | 0.34  | 0.49  | -1.15 | -0.18 | -0.12 | -0.15 | -    |
|           | 0.13       |            |       |       |       |       |       |       |       |       |       |       |      |
| GENE2664X | 19852_s_at | 19852_s_at | 1     | 0.25  | 0.29  | 1.4   | 0.53  | 0.91  | 0.32  |       |       |       |      |
|           | 1.44       | 0.64       | 0.31  | 0.04  | -0.1  | 0.05  | 0.12  | 0.27  | 0.17  | -0.12 | 0.26  | 0.01  |      |
|           | 0.04       | -0.01      | 0.18  | 0.25  | 0.21  | 0.32  | 0.27  | 0.26  | -0.37 | 0.09  | -0.13 | 0.08  | -    |
|           | 0.07       |            |       |       |       |       |       |       |       |       |       |       |      |
| GENE2663X | 18716_at   | 18716_at   | 1     | 2.88  | 1.8   | 5.45  | 4.45  | 4.32  | 1.13  |       |       |       |      |
|           | 4.3        | 1.76       | 0     | 0     | 0     | -1    | 0.26  | 2     | 2.37  | 0     | 0     | 0.84  | 0    |
|           | 0          | 0          | 0.84  | 4.03  | 0.67  | 2.2   | 0     | 0.26  | 0     | 0     | 0.48  | 0.26  |      |
| GENE2677X | 17907_s_at | 17907_s_at | 1     | 5.07  | 4.6   | 4.83  | 4.4   | 4.53  | 4     |       |       |       |      |
|           | 5.07       | 5.24       | 1.58  | 1.84  | 0     | 1.92  | 2.88  | 3.32  | 2.96  | 0     | 0     | 0     | 0    |
|           | 1.26       | 1.76       | 1     | 1.84  | 1.26  | 0.84  | 0     | 0     | 0     | 0     | 0     | 0     |      |
| GENE2676X | 16995_at   | 16995_at   | 1     | 4.54  | 5.53  | 4.77  | 4.2   | 4.13  | 2.75  |       |       |       |      |
|           | 4.76       | 4.13       | 1.15  | 1.92  | 0.9   | 1.13  | 2.48  | 1.84  | 2.88  | -0.73 | 0.73  | -0.2  |      |
|           | 0.45       | 1.05       | 0.63  | 0.52  | 1.51  | 1.28  | 1.44  | 0.48  | -0.08 | 0.58  | 0.07  | 0.18  | 0    |
| GENE2675X | 17279_at   | 17279_at   | 1     | 4.26  | 4.45  | 4.95  | 5.37  | 5.06  | 4.49  |       |       |       |      |
|           | 4.58       | 4.07       | 0     | 0     | 0     | 0     | 1.92  | 1     | 3.17  | 0     | 0     | 0     | 0    |
|           | 0.26       | 2.13       | 0.26  | 1.76  | 0.84  | 0     | 0     | 0     | 0     | 0     | 0     | 0     |      |
| GENE2674X | 12851_s_at | 12851_s_at | 1     | 2.76  | 2.96  | 3.48  | 3.26  | 3.53  | 2.48  |       |       |       |      |
|           | 2.96       | 2.88       | 1     | 0.48  | 0     | 0.84  | 0.48  | 0.84  | 2.07  | 0     | 0     | 0     | 0    |
|           | 0.67       | 1.13       | 1     | 2.13  | 0.84  | 0     | 0     | 0     | 0     | 0     | 0     | 0.26  |      |
| GENE2673X | 17111_s_at | 17111_s_at | 1     | 3.38  | 3.7   | 3.47  | 4.89  | 5.39  | 3.96  |       |       |       |      |
|           | 4.65       | 4.62       | 2.2   | 0.71  | 0.73  | 1.36  | 1.36  | 2.84  | 2.49  | -0.12 | 0.18  | 1.93  |      |
|           | 1.11       | 1.17       | 2.35  | 1.92  | 2.65  | 1.43  | 0.67  | 0.16  | 0.52  | 0.73  | 0.41  | 1.11  |      |
|           | 0.41       |            |       |       |       |       |       |       |       |       |       |       |      |
| GENE2672X | 14902_at   | 14902_at   | 1     | 2.82  | 2.8   | 3.55  | 3.68  | 3.33  | 3.1   |       |       |       |      |
|           | 2.5        | 3.11       | 0.32  | 1.15  | 0     | 0.44  | 1.18  | 1.41  | 2.73  | -0.66 | -1.15 | 1.39  |      |
|           | 0.45       | 1          | 1.87  | 0.69  | 1.52  | 1.08  | 0.58  | 0     | -0.26 | 0.58  | 0.41  | 0     | 1    |
| GENE2671X | 19623_at   | 19623_at   | 1     | 0.73  | 0.8   | 1.21  | 1.09  | 0.78  | 0.9   |       |       |       |      |
|           | 1.02       | 0.94       | 0.27  | 0.23  | 0.27  | 0.43  | 0.45  | 0.71  | 0.74  | 0.12  | -0.32 | 0.47  |      |

|           |            |            |      |       |       |      |      |       |       |       |       |       |   |
|-----------|------------|------------|------|-------|-------|------|------|-------|-------|-------|-------|-------|---|
|           | 0.52       | 0.29       | 0.37 | 0.42  | 0.36  | 0.38 | 0.2  | -0.16 | 0.01  | -0.01 | 0.08  | -0.01 |   |
|           | 0.16       |            |      |       |       |      |      |       |       |       |       |       |   |
| GENE2670X | 12314_at   | 12314_at   | 1    | 2.45  | 3.72  | 4.03 | 3.07 | 3.87  | 3.64  |       |       |       |   |
|           | 4.51       | 4.23       | 1.41 | 1.26  | 0     | 0.67 | 2.13 | 2.8   | 2     | -0.68 | -0.68 | 0     |   |
|           | 1.26       | 1          | 1.26 | 1.87  | 2.32  | 1.26 | 2.26 | 1.13  | 0.26  | 0.84  | 0     | 0.16  | - |
| 0.2       |            |            |      |       |       |      |      |       |       |       |       |       |   |
| GENE2669X | 16080_f_at | 16080_f_at | 1    | 1.35  | 1.29  | 1.51 | 1.6  | 1.26  | 1.28  |       |       |       |   |
|           | 1.45       | 1.58       | 0.22 | 0.36  | -0.28 | 0.15 | 0.34 | 0.79  | 0.94  | -0.12 | -0.23 | 0.35  |   |
|           | 0.42       | 0.37       | 0.35 | 0.73  | 0.84  | 0.65 | 0.36 | 0.2   | 0.25  | 0.15  | -0.08 | 0.25  |   |
| 0.12      |            |            |      |       |       |      |      |       |       |       |       |       |   |
| GENE2668X | 18557_at   | 18557_at   | 1    | 1.23  | 1.45  | 1.71 | 1.55 | 1.84  | 1.42  |       |       |       |   |
|           | 1.57       | 1.55       | 0.25 | -0.08 | 0.34  | 0.42 | 0.42 | 0.73  | 0.87  | -0.12 | -0.28 | 0.13  |   |
|           | 0.51       | 0.58       | 0.65 | 0.87  | 0.92  | 0.5  | 0.5  | 0.41  | -0.39 | 0.12  | -0.05 | -0.26 |   |
| 0.35      |            |            |      |       |       |      |      |       |       |       |       |       |   |
| GENE2678X | 16902_at   | 16902_at   | 1    | 1.12  | 1.33  | 1.83 | 1.68 | 1.51  | 1.21  |       |       |       |   |
|           | 1.39       | 1.44       | 0.07 | 0.02  | -0.13 | 0.13 | 0.33 | 0.55  | 0.51  | -0.3  | -0.07 | 0.15  |   |
|           | 0.25       | 0.15       | 0.21 | 0.35  | 0.91  | 0.91 | 0.64 | 0.58  | 0.02  | 0     | 0.02  | 0.12  |   |
| 0.04      |            |            |      |       |       |      |      |       |       |       |       |       |   |
| GENE2590X | 14697_g_at | 14697_g_at | 1    | 1.45  | 1.22  | 2.22 | 2.29 | 1.72  | 1.5   |       |       |       |   |
|           | 1.58       | 1.58       | 0.08 | 0.09  | -0.01 | 0.07 | 0.11 | 0.41  | 0.52  | -0.28 | -0.23 | 0.45  |   |
|           | 0.67       | 0.05       | 0.5  | 0.62  | 0.92  | 0.79 | 0.51 | 0.66  | 0.22  | 0     | 0.2   | 0.16  | - |
| 0.02      |            |            |      |       |       |      |      |       |       |       |       |       |   |
| GENE2593X | 12081_at   | 12081_at   | 1    | 3.67  | 3.12  | 3.7  | 4.2  | 3.45  | 1.92  |       |       |       |   |
|           | 2.8        | 2.8        | 0.51 | 0     | 0.4   | 0.48 | 1.09 | 0.72  | 1.23  | 0.61  | 0.72  | 0.78  |   |
|           | 1.59       | 0.49       | 1.07 | 0.48  | 1.6   | 1.38 | 1.01 | 0.44  | 0.36  | 0.01  | -0.08 | 0.29  |   |
| 0.32      |            |            |      |       |       |      |      |       |       |       |       |       |   |
| GENE2592X | 13100_at   | 13100_at   | 1    | 4.23  | 4.54  | 5.13 | 6.66 | 5.44  | 3.77  |       |       |       |   |
|           | 5.03       | 4.31       | 1.72 | -0.15 | 0.84  | 0.51 | 1.35 | 1.58  | 2.26  | -0.26 | -1.88 | 1.76  | 1 |
|           | 0.54       | 1.78       | 1.96 | 2.96  | 2.48  | 2.37 | 1    | 0.92  | 0.92  | 0.92  | 0.46  | 0.54  |   |
| GENE2591X | 13158_at   | 13158_at   | 1    | 1.53  | 1.37  | 2.41 | 2.37 | 1.89  | 0.98  |       |       |       |   |
|           | 2.15       | 1.26       | 0.63 | -0.1  | 0.46  | 0.16 | 0.32 | 0.83  | 0.36  | -0.05 | -0.34 | 0.6   |   |
|           | 0.91       | -0.25      | 0.73 | 0.84  | 0.9   | 0.79 | 0.71 | 0.21  | 0.34  | 0.29  | 0.05  | 0.05  |   |
| 0.2       |            |            |      |       |       |      |      |       |       |       |       |       |   |
| GENE2597X | 17548_s_at | 17548_s_at | 1    | 3.68  | 4.67  | 4.87 | 5.53 | 5.53  | 2.28  |       |       |       |   |
|           | 4.1        | 1.86       | 1.91 | -0.2  | 1     | 1.55 | 1.28 | 1.36  | 2.07  | 0     | -0.59 | 1.12  |   |
|           | 0.23       | -1         | 2.18 | 1.82  | 2     | 1.48 | 1.13 | 0     | 0.16  | 0.58  | 0.38  | -0.81 |   |
| 0.83      |            |            |      |       |       |      |      |       |       |       |       |       |   |
| GENE2596X | 19614_at   | 19614_at   | 1    | 3.45  | 5.03  | 4.59 | 4.9  | 5.07  | 1.7   |       |       |       |   |
|           | 4.49       | 2.14       | 1.78 | -0.34 | 0.58  | 1.91 | 1.73 | 1.9   | 2.12  | 0.02  | -0.88 | 0.91  | - |
| 0.39      | 0          | 2.08       | 1.51 | 2.2   | 2     | 1.26 | 0    | 0     | 0.34  | 0.53  | -1.32 | 0.78  |   |
| GENE2595X | 13176_at   | 13176_at   | 1    | 1.32  | 2.28  | 2.4  | 2.75 | 2.73  | 1.45  |       |       |       |   |
|           | 2.27       | 1.15       | 0.45 | -0.39 | 0.31  | 0.36 | 0.6  | 0.38  | 0.71  | -0.08 | -0.16 | 0.7   |   |
|           | 0.12       | -0.13      | 0.5  | 0.93  | 1.17  | 0.91 | 0.77 | -0.07 | 0.22  | 0.2   | 0.15  | -0.49 | - |
| 0.02      |            |            |      |       |       |      |      |       |       |       |       |       |   |
| GENE2594X | 20491_at   | 20491_at   | 1    | 3.67  | 4.2   | 4.03 | 4.27 | 3.29  | 2.02  |       |       |       |   |
|           | 4.06       | 3.4        | 1.34 | -1.12 | -0.3  | 0.07 | 0.36 | 1.88  | 0.36  | -0.23 | -0.18 | 0.41  |   |
|           | 0.28       | -0.1       | 1.06 | 1.54  | 0.94  | 0.41 | 1    | -0.05 | 0.09  | 0     | 0.27  | -0.45 | - |
| 0.05      |            |            |      |       |       |      |      |       |       |       |       |       |   |
| GENE2645X | 20247_at   | 20247_at   | 1    | 1.37  | 1.84  | 4.2  | 2.8  | 3.88  | 2.2   |       |       |       |   |
|           | 3.82       | 3.9        | 0    | 0     | 0     | 0    | 0    | 0.84  | 1.67  | 0     | 0     | 0     | 0 |
|           | 0          | 0.84       | 0    | 0.67  | 0     | 0    | 0    | 0     | 0     | 0     | 0     | 0     |   |
| GENE2644X | 17485_s_at | 17485_s_at | 1    | 3.43  | 3.07  | 5.71 | 3.67 | 5     | 3.53  |       |       |       |   |
|           | 6.38       | 4.68       | 1.36 | 0     | 0.26  | 0.18 | 0.77 | 2.13  | 1.48  | -0.26 | 0.21  | 0.67  |   |
|           | 0.26       | 0.48       | 0    | 1.27  | 2.13  | 1.26 | 1.67 | 0     | 0.67  | 0     | 0.48  | 0     | 0 |
| 0         |            |            |      |       |       |      |      |       |       |       |       |       |   |
| GENE2643X | 13137_at   | 13137_at   | 1    | 1.66  | 1.99  | 3.23 | 2.5  | 2.73  | 2.03  |       |       |       |   |
|           | 2.59       | 2.38       | 0.84 | 0.59  | 0.02  | 0.48 | 0.69 | 1.02  | 1.44  | -0.08 | 0.32  | 0.15  |   |

|           |            |            |       |       |       |       |       |       |       |       |       |       |   |
|-----------|------------|------------|-------|-------|-------|-------|-------|-------|-------|-------|-------|-------|---|
|           | 0.17       | -0.49      | 0.28  | 0.72  | 0.62  | 0.6   | 0.56  | 0.35  | 0.72  | 0.35  | 0.09  | 0.04  | - |
| 0.01      |            |            |       |       |       |       |       |       |       |       |       |       |   |
| GENE2642X | 16027_s_at | 16027_s_at | 1     | 0.79  | 1.02  | 1.22  | 1.05  | 1.22  | 1     |       |       |       |   |
|           | 1.43       | 1.37       | 0.2   | 0.25  | -0.15 | 0.11  | 0.2   | 0.44  | 0.33  | -0.04 | 0.08  | 0.08  |   |
|           | 0.22       | 0.02       | 0.12  | 0.4   | 0.29  | 0.16  | 0.07  | 0.44  | 0.4   | 0.09  | -0.08 | 0.11  |   |
| 0.05      |            |            |       |       |       |       |       |       |       |       |       |       |   |
| GENE2641X | 15199_s_at | 15199_s_at | 1     | 1.8   | 1.49  | 2.3   | 1.79  | 1.6   | 1.37  |       |       |       |   |
|           | 2.53       | 2.19       | 0.35  | -0.39 | -0.55 | -0.32 | 0.28  | 0.85  | 0.86  | 0.17  | 0.44  | 0.94  |   |
|           | 0.16       | 0.16       | -0.35 | 1.06  | 0.17  | 0.29  | 0.21  | 0.7   | 0     | 0     | -0.21 | 0.36  | 0 |
| GENE2640X | 13605_at   | 13605_at   | 1     | 0.38  | 0.71  | 1.29  | 1.1   | 0.71  | 1.01  |       |       |       |   |
|           | 1.33       | 1.54       | 0     | -0.26 | 0.05  | -0.04 | -0.23 | 0.56  | 0.36  | -0.16 | 0.01  | 0.25  |   |
|           | 0.64       | 0.11       | 0.02  | 0.46  | 0     | -0.01 | 0     | 0.36  | 0.31  | -0.08 | 0.07  | -0.02 | - |
| 0.04      |            |            |       |       |       |       |       |       |       |       |       |       |   |
| GENE2639X | 16591_s_at | 16591_s_at | 1     | 0.45  | 0.67  | 1.11  | 0.79  | 0.38  | 0.63  |       |       |       |   |
|           | 1.04       | 1.31       | -0.18 | 0     | -0.13 | 0.07  | 0     | 0.33  | 0.28  | -0.18 | 0.31  | 0     |   |
|           | 0.43       | -0.25      | 0.05  | 0.11  | 0.25  | 0.13  | 0.05  | 0.42  | 0.38  | 0.13  | 0.04  | 0     | - |
| 0.01      |            |            |       |       |       |       |       |       |       |       |       |       |   |
| GENE2638X | 20422_g_at | 20422_g_at | 1     | 2.84  | 2.43  | 4.43  | 2.96  | 2.53  | 5.37  |       |       |       |   |
|           | 3.47       | 4.81       | 0.26  | -0.26 | 0     | 0     | 0.84  | 0.78  | 3.19  | 0     | 0     | 1.13  |   |
|           | 0.48       | 0          | 0     | 1.48  | 0     | 0.26  | 0     | 0     | 0     | 0     | 0     | 0     | 0 |
| GENE2637X | 14780_at   | 14780_at   | 1     | 2.63  | 2.4   | 3.3   | 3.19  | 2.14  | 3.25  |       |       |       |   |
|           | 2.63       | 3.88       | -0.49 | 0.88  | -0.49 | -0.23 | 0.5   | 1.13  | 1.89  | 0.26  | 0     | 0     |   |
|           | 0.65       | 0.84       | 0.48  | 0.18  | 0     | 0     | 0     | 0     | 0.26  | 0     | 0     | 0     |   |
| 0.26      |            |            |       |       |       |       |       |       |       |       |       |       |   |
| GENE2636X | 20337_at   | 20337_at   | 1     | 1.38  | 1.32  | 1.51  | 1.63  | 1.49  | 2     |       |       |       |   |
|           | 1.35       | 1.53       | -0.13 | 0.29  | -0.16 | 0.52  | 0.55  | 0.49  | 1.27  | -0.02 | 0     | 0.46  |   |
|           | 0.84       | 0.09       | 0.15  | 0.11  | 0.11  | 0.31  | -0.12 | -0.39 | -0.12 | -0.05 | -0.16 | -0.39 | - |
| 0.1       |            |            |       |       |       |       |       |       |       |       |       |       |   |
| GENE2635X | 13267_at   | 13267_at   | 1     | 1     | 1.02  | 1.56  | 1.15  | 0.79  | 0.99  | 1     |       |       |   |
|           | 1.16       | 0.08       | 0.05  | -0.18 | 0.22  | 0.32  | 0.73  | 0.64  | -0.02 | -0.07 | 0.12  | 0.35  | - |
| 0.34      | 0.29       | 0.12       | 0.74  | 0.65  | 0.48  | -0.55 | 0     | 0.16  | 0.05  | -0.16 | 0.08  |       |   |
| GENE2634X | 13126_g_at | 13126_g_at | 1     | 0.97  | 0.79  | 1.17  | 1.13  | 0.54  | 0.68  |       |       |       |   |
|           | 0.98       | 1.29       | -0.12 | 0.2   | 0.17  | -0.04 | 0.01  | 0.37  | 0.51  | 0.11  | -0.05 | 0.36  |   |
|           | 0.23       | -0.39      | 0.07  | 0.23  | 0.22  | 0.16  | 0.04  | -0.1  | 0.08  | 0.04  | 0.01  | -0.01 |   |
| 0.07      |            |            |       |       |       |       |       |       |       |       |       |       |   |
| GENE2589X | 15646_s_at | 15646_s_at | 1     | 2.44  | 2.36  | 3.93  | 4.21  | 2.52  | 1.58  |       |       |       |   |
|           | 2.37       | 1.92       | 0.08  | 0.89  | 0.68  | 0.04  | 0     | 0.08  | 1.97  | -0.39 | -0.01 | 1.36  |   |
|           | 2.28       | 0.18       | 1.23  | 1.29  | 0.97  | 0.88  | 0.56  | 0.16  | 0.15  | -0.08 | -0.71 | 0.11  | - |
| 0.13      |            |            |       |       |       |       |       |       |       |       |       |       |   |
| GENE2588X | 13437_at   | 13437_at   | 1     | 0.95  | 1.45  | 1.88  | 1.73  | 1.32  | 0.93  |       |       |       |   |
|           | 1.7        | 1.09       | 0.36  | 0.37  | 0.41  | 0.22  | 0.18  | 0.04  | 1.04  | -0.04 | -0.16 | 0.13  |   |
|           | 0.48       | 0.2        | 0.62  | 0.73  | 0.5   | 0.35  | 0.22  | 0.58  | 0.5   | 0     | -0.08 | 0.17  |   |
| 0.02      |            |            |       |       |       |       |       |       |       |       |       |       |   |
| GENE2587X | 17578_at   | 17578_at   | 1     | 0.92  | 1.23  | 1.98  | 1.53  | 1.26  | 1.5   |       |       |       |   |
|           | 0.72       | 0.72       | 0.25  | 0.55  | 0.09  | 0.22  | 0.32  | -0.21 | 1.13  | 0.16  | 0     | 0.35  |   |
|           | 0.94       | -0.15      | 0.51  | 0.9   | 0.32  | 0.26  | 0     | 0.73  | 0.51  | 0.07  | -0.3  | -0.1  | - |
| 0.15      |            |            |       |       |       |       |       |       |       |       |       |       |   |
| GENE2586X | 12002_at   | 12002_at   | 1     | 1.89  | 2.42  | 3.17  | 3.83  | 2.29  | 1.45  |       |       |       |   |
|           | 2.4        | 1.95       | 0.59  | 1.25  | 1.03  | 1.14  | 1.08  | 1     | 1.54  | 0.23  | 0.12  | 0.79  |   |
|           | 1.67       | -0.18      | 0.97  | 0.46  | 0.31  | 0.18  | -0.02 | 0.36  | 0.28  | 0.18  | -0.23 | 0.36  |   |
| 0.7       |            |            |       |       |       |       |       |       |       |       |       |       |   |
| GENE2585X | 15410_at   | 15410_at   | 1     | 0.58  | 1.31  | 1.84  | 1.55  | 0.79  | 0.4   |       |       |       |   |
|           | 0.85       | 1.12       | 0     | 0.82  | 0.56  | 0.21  | 0.32  | 0.31  | 0.69  | 0.02  | 0.35  | 0.28  |   |
|           | 0.48       | 0          | 0.15  | 0.09  | 0.28  | 0.15  | 0.22  | 0.43  | 0.41  | 0.23  | 0.13  | 0.22  |   |
| 0.08      |            |            |       |       |       |       |       |       |       |       |       |       |   |
| GENE2584X | 14417_at   | 14417_at   | 1     | 0.89  | 1.26  | 1.22  | 1.18  | 0.67  | 0.56  |       |       |       |   |
|           | 0.91       | 1.02       | 0.15  | 0.57  | 0.12  | 0.41  | 0.44  | 0.38  | 0.49  | 0.01  | 0.51  | 0.08  |   |

|           |            |       |            |       |       |       |       |       |       |       |       |       |      |
|-----------|------------|-------|------------|-------|-------|-------|-------|-------|-------|-------|-------|-------|------|
|           | 0.68       | 0.45  | 0.48       | 0.2   | 0.21  | 0.2   | 0.16  | 0.58  | 0.2   | 0.13  | -0.01 | 0.35  |      |
|           | 0.29       |       |            |       |       |       |       |       |       |       |       |       |      |
| GENE2583X | 14660_at   |       | 14660_at   | 1     |       | 0.87  | 0.5   | 1.83  | 1.34  | 0.92  | 1.04  |       |      |
|           | 0.48       | 1.11  | 0.47       | 0.36  | 0.41  | 0.46  | 0.52  | 0.6   | 0.97  | 0.22  | 0.33  | -0.18 |      |
|           | 0.73       | -0.18 | 0.21       | 0.31  | 0     | 0.07  | 0.07  | 0.37  | 0.15  | 0.22  | 0.02  | 0.37  |      |
|           | 0.34       |       |            |       |       |       |       |       |       |       |       |       |      |
| GENE2625X | 12535_at   |       | 12535_at   | 1     |       | 3.63  | 4.01  | 4.99  | 4.23  | 4.95  | 1.84  |       |      |
|           | 5.33       | 3.37  | 0.67       | 0.87  | 0     | 0.67  | 0     | 0.67  | 1.11  | 0     | 0.26  | 0     | 0    |
|           | 0          | 0     | 0          | 0.84  | 1     | 0     | 0     | 0     | 0     | 0     | 0     | 0.67  |      |
| GENE2624X | 12449_s_at |       | 12449_s_at | 1     |       | 3.94  | 4.7   | 4.51  | 5.11  | 3.39  | 0.65  |       |      |
|           | 4.29       | 3.45  | 0.2        | 0.11  | 0.82  | 0.27  | 0.83  | 1.89  | 1.93  | 0.13  | 0.92  | 0.73  |      |
|           | 0.15       | 0.28  | 0          | 0.2   | -0.41 | -0.13 | -0.13 | -0.39 | -0.13 | -0.41 | -0.41 | 0.52  |      |
|           | 0.91       |       |            |       |       |       |       |       |       |       |       |       |      |
| GENE2623X | 13381_at   |       | 13381_at   | 1     |       | 3.51  | 3.7   | 6.2   | 5.57  | 4.47  | 2.8   |       |      |
|           | 4.26       | 4.36  | 0          | 0     | 0     | 0     | 0     | 0     | 0     | 0     | 0     | 0     | 0    |
|           | 0          | 0     | 0.67       | 0     | 0     | 0     | 0     | 0     | 0     | 0     | 0     | 0     |      |
| GENE2622X | 18213_at   |       | 18213_at   | 1     |       | 2.13  | 1.58  | 4.43  | 4.29  | 3.4   | 3     |       |      |
|           | 3.26       | 3.03  | 0          | 0     | 0     | 0     | 0.84  | 0.26  | 0     | 0     | 0     | 0     | 0    |
|           | 0          | 0     | 0          | 0     | 0     | 0     | 0     | 0     | 0     | 0     | 0     | 0     |      |
| GENE2621X | 19489_s_at |       | 19489_s_at | 1     |       | 2.97  | 2.58  | 3.13  | 3.33  | 2.61  | 3.14  |       |      |
|           | 1.84       | 3.13  | 0.79       | 0     | -0.2  | 0.26  | 0     | 0.67  | 0.67  | 0.41  | 0.73  | 0.69  |      |
|           | 0.58       | -0.86 | 0.18       | 0.67  | -0.2  | 0     | -0.68 | 0.26  | 0.35  | 0.35  | -0.49 | -0.18 | 0    |
| GENE2620X | 17041_s_at |       | 17041_s_at | 1     |       | 1.86  | 1.58  | 1.74  | 2.88  | 2.51  | 1.2   |       |      |
|           | 1.57       | 2.06  | 0.48       | 0.43  | 0.37  | 0.44  | 0.12  | 0.58  | 1.17  | 0.31  | 0.7   | -0.2  | -    |
|           | 0.81       | -0.16 | -0.25      | -0.15 | -0.55 | -0.32 | -0.28 | -0.39 | -0.28 | 0.05  | 0.27  | -0.16 | 0.46 |
| GENE2619X | 13647_at   |       | 13647_at   | 1     |       | 1.32  | 1.22  | 1.31  | 1.17  | 1.26  | 1.14  | 1     |      |
|           | 1.37       | 0.35  | 0.57       | 0.22  | 0.23  | 0.29  | 0.55  | 0.87  | 0.25  | 0.37  | 0.35  | -0.05 |      |
|           | 0.21       | 0.44  | 0.25       | -0.05 | -0.28 | -0.45 | -0.32 | -0.35 | 0.07  | 0.09  | -0.37 | -0.18 |      |
| GENE2145X | 15531_i_at |       | 15531_i_at | 1     |       | 2.92  | 1.92  | 4.74  | 4.76  | 4.96  | 1.92  |       |      |
|           | 4.94       | 4.23  | 1.13       | 3.4   | 1     | 0.48  | 2.13  | 4.3   | 3.7   | 0     | 0     | 0     | 0    |
|           | 0          | 1     | 0          | 1.48  | 0     | 0     | 0     | 0     | 0     | 0     | 0     | 0     |      |
| GENE2144X | 18963_at   |       | 18963_at   | 1     |       | 3.77  | 2.74  | 4.11  | 4.45  | 4.85  | 2.49  |       |      |
|           | 5.45       | 5.23  | 2.2        | 2.39  | 2.21  | 1.56  | 2.4   | 3.73  | 2.37  | 0.84  | -1.05 | 1.4   |      |
|           | 0.74       | 0.35  | 1.56       | 0.69  | 2.11  | 0.97  | 0.48  | 0.42  | -0.15 | 0.27  | -0.49 | 0.02  |      |
|           | 0.15       |       |            |       |       |       |       |       |       |       |       |       |      |
| GENE2143X | 18596_at   |       | 18596_at   | 1     |       | 1.44  | 1.37  | 2.57  | 2.56  | 2.98  | 2.33  |       |      |
|           | 3.05       | 2.44  | 1.48       | 1.09  | 1     | 0.79  | 0.67  | 1.89  | 1.8   | 0.15  | -0.26 | 0.5   |      |
|           | 0.22       | 0.22  | 0.52       | 1.48  | 1.29  | 1.15  | 0.95  | 0     | -0.59 | 0.15  | 0.28  | -0.18 | -    |
|           | 0.04       |       |            |       |       |       |       |       |       |       |       |       |      |
| GENE2142X | 19982_at   |       | 19982_at   | 1     |       | 2     | 2.4   | 2.21  | 2.63  | 2.98  | 2.38  |       |      |
|           | 2.38       | 2     | 1.77       | 1.78  | 1.05  | 1.69  | 1.27  | 1.79  | 1.77  | 0.27  | -0.1  | 0.76  |      |
|           | 0.16       | -0.15 | -0.12      | 1.15  | 0.61  | 0.49  | 0.79  | -0.78 | -0.68 | -0.47 | -0.05 | -0.07 |      |
|           | 0.22       |       |            |       |       |       |       |       |       |       |       |       |      |
| GENE2141X | 19132_at   |       | 19132_at   | 1     |       | 0.48  | 1.46  | 1.37  | 1.38  | 1.63  | 1.43  |       |      |
|           | 1.59       | 1.29  | 0.42       | 0.79  | 0.61  | 1.03  | 0.71  | 0.99  | 0.87  | -0.21 | 0     | 0.27  |      |
|           | 0.11       | 0.16  | 0.12       | 0.8   | 0.44  | 0.4   | 0.55  | -0.21 | 0.02  | -0.2  | 0.09  | -0.32 | -    |
|           | 0.04       |       |            |       |       |       |       |       |       |       |       |       |      |
| GENE2140X | 15088_at   |       | 15088_at   | 1     |       | 2.38  | 3.43  | 2.45  | 2.83  | 2.58  | 1.54  |       |      |
|           | 2.71       | 2.48  | 1.07       | 1.18  | 0.78  | 2.37  | 2.14  | 2.02  | 1.62  | 0.72  | 0.65  | 0.56  | -    |
|           | 0.81       | -0.28 | 0.87       | 0.79  | 1     | 0.73  | -0.26 | -0.18 | 0.41  | 0.5   | -1.08 | 0.13  |      |
| GENE2139X | 16058_s_at |       | 16058_s_at | 1     |       | 1.16  | 1.82  | 1.72  | 1.62  | 1.59  | 1.7   |       |      |
|           | 2.14       | 2.48  | 0.94       | 0.86  | 0.29  | 1.22  | 0.92  | 1.59  | 0.99  | 0.11  | 0.04  | 0.11  | -    |
|           | 0.57       | -0.49 | 0.13       | 0.64  | 0.29  | 0.32  | 0.27  | -0.37 | -0.02 | -0.07 | 0.36  | -0.13 | -0.1 |
| GENE2138X | 13259_s_at |       | 13259_s_at | 1     |       | 0.93  | 1.61  | 1.88  | 1.8   | 1.32  | 1.54  |       |      |
|           | 1.54       | 2.02  | 0.41       | 1.01  | 0.37  | 1.24  | 1.07  | 1.11  | 1.1   | 0.17  | 0.05  | 0.21  | -    |
|           | 0.45       | -0.08 | 0.07       | 0.41  | 0.23  | 0.23  | 0.34  | -0.16 | -0.39 | -0.32 | 0.22  | 0.02  | 0.22 |

|           |            |            |       |       |       |       |      |       |       |       |       |       |   |
|-----------|------------|------------|-------|-------|-------|-------|------|-------|-------|-------|-------|-------|---|
| GENE2137X | 20189_at   | 20189_at   | 1     | 1.48  | 1.81  | 2.53  | 2.96 | 2.52  | 2.15  |       |       |       |   |
|           | 2.65       | 3.3        | 0.96  | 0.74  | 1.15  | 1.32  | 1.24 | 1.61  | 1.03  | 0.02  | 0.36  | 1.7   | 0 |
|           | 0.13       | 1.88       | 1.13  | 1.42  | 0.67  | 0.27  | 1.58 | -1.32 | 0.23  | 0.53  | -0.62 | -0.53 |   |
| GENE2133X | 15594_s_at | 15594_s_at | 1     | 3.25  | 3.06  | 3.58  | 4.57 | 3.84  | 3.29  |       |       |       |   |
|           | 3.61       | 3.79       | 1.32  | 0.77  | 1.11  | 1.4   | 1.87 | 1.7   | 2.12  | 0.26  | 0.08  | 1.05  |   |
|           | 0.8        | 0.26       | 0.65  | 1.54  | 0.92  | 0.77  | 0.48 | 0.6   | -0.49 | -0.41 | -0.07 | 0.15  | - |
| 0.05      |            |            |       |       |       |       |      |       |       |       |       |       |   |
| GENE2132X | 16083_at   | 16083_at   | 1     | 1.97  | 1.64  | 2.17  | 2.39 | 2.44  | 2.03  |       |       |       |   |
|           | 2.19       | 1.94       | 1.2   | 0.52  | 0.73  | 0.61  | 0.69 | 0.86  | 1.02  | 0.51  | 0.4   | 1.1   |   |
|           | 0.73       | 0.31       | 0.85  | 1.07  | 0.91  | 0.4   | 0.15 | 0.22  | 0.02  | -0.13 | 0.04  | -0.1  |   |
|           | 0.17       |            |       |       |       |       |      |       |       |       |       |       |   |
| GENE2127X | 15140_s_at | 15140_s_at | 1     | 1.21  | 0.84  | 1.31  | 1.35 | 1.12  | 1.08  |       |       |       |   |
|           | 1.48       | 0.96       | 0.47  | 0.41  | 0.17  | 0.57  | 0.54 | 0.32  | 0.65  | 0.26  | 0.49  | 0.45  |   |
|           | 0.18       | 0.08       | 0.05  | 0.49  | 0.42  | 0.31  | 0.17 | 0.12  | 0.12  | 0.08  | 0.08  | -0.35 | - |
| 0.05      |            |            |       |       |       |       |      |       |       |       |       |       |   |
| GENE2128X | 17482_at   | 17482_at   | 1     | 1.35  | 1     | 1.59  | 1.61 | 1.35  | 1.43  |       |       |       |   |
|           | 1.37       | 1.43       | 0.16  | 0.67  | 0.35  | 0.6   | 0.54 | 0.66  | 0.9   | 0.05  | 0.2   | 0.52  |   |
|           | 0.42       | 0.17       | 0.16  | 0.57  | 0.66  | 0.52  | 0.36 | -0.23 | -0.64 | -0.41 | -0.21 | 0     | - |
| 0.07      |            |            |       |       |       |       |      |       |       |       |       |       |   |
| GENE2130X | 17376_at   | 17376_at   | 1     | 1.66  | 1.73  | 2.24  | 1.88 | 2.11  | 2.45  |       |       |       |   |
|           | 1.52       | 1.97       | 1.02  | 0.68  | 0.28  | 0.84  | 1.02 | 1.22  | 1.42  | 0.26  | 0.16  | 0.79  |   |
|           | 0.87       | 0.32       | 0.34  | 1.42  | 0.37  | 0.46  | 0.37 | 0.51  | -0.23 | 0.16  | 0.11  | 0.01  |   |
|           | 0.04       |            |       |       |       |       |      |       |       |       |       |       |   |
| GENE2129X | 13450_at   | 13450_at   | 1     | 0.84  | 1.06  | 1.31  | 0.9  | 1.01  | 1.13  |       |       |       |   |
|           | 1.1        | 1          | 0.21  | 0.26  | 0.17  | 0.35  | 0.43 | 0.51  | 0.74  | 0.11  | 0.22  | 0.25  |   |
|           | 0.48       | 0.15       | 0     | 0.53  | 0.13  | 0.16  | 0.18 | 0.22  | -0.21 | -0.04 | 0.02  | 0.07  |   |
|           | 0.11       |            |       |       |       |       |      |       |       |       |       |       |   |
| GENE1921X | 14663_s_at | 14663_s_at | 1     | 2.25  | 2.25  | 3.95  | 3.29 | 3.87  | 3     |       |       |       |   |
|           | 2.82       | 2.47       | 2     | 1.95  | 1.13  | 1.8   | 1.32 | 2.23  | 2.85  | 0.13  | 0.7   | 1     |   |
|           | 0.76       | -0.39      | 0.08  | 2.39  | 0.21  | 0.65  | 0.9  | 1.17  | -0.41 | -0.21 | -0.28 | -0.21 | - |
| 0.39      |            |            |       |       |       |       |      |       |       |       |       |       |   |
| GENE2104X | 17824_s_at | 17824_s_at | 1     | 3.26  | 3.7   | 4.81  | 5.7  | 4.34  | 2.08  |       |       |       |   |
|           | 3.67       | 2.88       | 0.32  | 1.65  | 1.51  | 1.04  | 1.29 | 1.34  | 2.05  | 0     | -1.51 | 1.58  |   |
|           | 0.18       | 0.5        | 1.85  | 0.32  | 2.04  | 1.45  | 0.69 | 0     | 1.08  | 0.32  | 1     | 0.42  |   |
|           | 0.5        |            |       |       |       |       |      |       |       |       |       |       |   |
| GENE2103X | 14367_at   | 14367_at   | 1     | 2.72  | 3.62  | 3.58  | 4.31 | 3.15  | 1.07  |       |       |       |   |
|           | 2.55       | 1.9        | 0.6   | 3.1   | 2.39  | 1.23  | 1.39 | 1.17  | 1.88  | 0     | -0.81 | 1.49  |   |
|           | 0.78       | 0.8        | 0.97  | 0.36  | 1.22  | 0.78  | 0    | 0.45  | -0.86 | -0.25 | -0.08 | -0.51 |   |
|           | 0.01       |            |       |       |       |       |      |       |       |       |       |       |   |
| GENE2102X | 17521_at   | 17521_at   | 1     | 1.97  | 3.04  | 2.95  | 3.21 | 2.28  | 1.15  |       |       |       |   |
|           | 1.94       | 2.38       | 0.73  | 1.62  | 0.65  | 1.82  | 1.56 | 1.5   | 1.93  | 0.09  | -0.16 | 0.63  |   |
|           | 0.13       | -1         | 0.43  | -0.08 | 1.52  | 1.04  | 0.68 | 0.37  | 0.13  | -0.02 | -0.13 | -0.15 | - |
| 0.05      |            |            |       |       |       |       |      |       |       |       |       |       |   |
| GENE2101X | 17929_s_at | 17929_s_at | 1     | 2.44  | 2.6   | 2.56  | 2.99 | 2.33  | 1.65  |       |       |       |   |
|           | 2.3        | 2.22       | 0.54  | 1.93  | 1.05  | 1.05  | 0.86 | 1.83  | 1.45  | 0.66  | 0.21  | 0.77  |   |
|           | 0.4        | 0.18       | 0.84  | -0.12 | 1.17  | 0.4   | 0.09 | -0.53 | 0.32  | 0.09  | 0.46  | 0.11  |   |
|           | 0.48       |            |       |       |       |       |      |       |       |       |       |       |   |
| GENE2100X | 20393_at   | 20393_at   | 1     | 1.93  | 1.91  | 1.93  | 2.17 | 1.81  | 0.69  |       |       |       |   |
|           | 1.6        | 1.58       | 0.15  | 1.05  | 0.58  | 0.53  | 0.66 | 1.2   | 1.22  | 0.37  | -0.05 | 0.5   |   |
|           | 0.09       | 0.07       | 0.02  | -0.43 | 0.36  | 0.21  | 0.41 | -0.25 | -0.25 | -0.04 | -0.41 | 0.23  |   |
|           | 0.23       |            |       |       |       |       |      |       |       |       |       |       |   |
| GENE2608X | 20519_at   | 20519_at   | 1     | 2.35  | 2.25  | 3.32  | 3.14 | 3     | 1.28  |       |       |       |   |
|           | 1.59       | 0.49       | 0     | -0.66 | -0.16 | -0.15 | 0.55 | -0.78 | 1.6   | -0.76 | -1.05 | 0.27  |   |
|           | 0.83       | -1.28      | -0.3  | 0.17  | -0.39 | -0.39 | 0    | -1.28 | -0.55 | -0.41 | -1.43 | -0.08 | - |
| 0.64      |            |            |       |       |       |       |      |       |       |       |       |       |   |
| GENE2607X | 12246_s_at | 12246_s_at | 1     | 1.54  | 1.29  | 1.66  | 1.26 | 1.58  | 1.63  |       |       |       |   |
|           | 0.73       | 1.09       | -0.28 | -1.15 | -0.59 | 0.34  | 0.78 | -0.32 | 0.78  | 0.21  | 0.32  | 0     |   |



|           |            |            |       |       |       |       |       |       |       |       |       |       |       |  |
|-----------|------------|------------|-------|-------|-------|-------|-------|-------|-------|-------|-------|-------|-------|--|
| GENE1926X | 19421_at   | 19421_at   | 1     | 1.15  | 2.48  | 3.06  | 2.85  | 2.53  | 1.27  |       |       |       |       |  |
|           | 2.57       | 1.75       | 0.29  | 0.21  | 0.36  | 0.09  | 0.08  | 0.55  | 0.48  | -0.37 | -0.76 | 0.26  |       |  |
|           | 0.32       | -0.37      | 0.22  | 0.55  | 0.68  | 1.01  | 0.12  | 0.18  | 0.05  | -0.43 | -0.08 | -0.47 | -     |  |
|           | 0.02       |            |       |       |       |       |       |       |       |       |       |       |       |  |
| GENE1925X | 20438_at   | 20438_at   | 1     | 0.62  | 1.49  | 2.43  | 1.95  | 2.59  | 1.27  |       |       |       |       |  |
|           | 2.79       | 1.26       | 1.19  | 0.21  | 0.73  | 0.01  | 0.37  | 1.07  | 0.09  | -0.01 | -0.21 | 0.49  |       |  |
|           | 0.42       | 0.18       | -0.08 | 1.05  | 0.84  | 0.94  | 0.79  | 0.69  | 0.43  | 0.13  | -0.12 | 0.21  |       |  |
|           | 0.25       |            |       |       |       |       |       |       |       |       |       |       |       |  |
| GENE1924X | 20060_at   | 20060_at   | 1     | 0.34  | 1.59  | 2.31  | 1.61  | 2.18  | 0.97  |       |       |       |       |  |
|           | 2.48       | 0.85       | 0.91  | 0.27  | 0.56  | 0.32  | 0.44  | 0.84  | 0.28  | -0.07 | -0.01 | 0.5   |       |  |
|           | 0.31       | 0.21       | 0.05  | 0.84  | 0.44  | 0.59  | 0.47  | 0.5   | 0.56  | 0.04  | 0.12  | 0.17  |       |  |
|           | 0.21       |            |       |       |       |       |       |       |       |       |       |       |       |  |
| GENE1917X | 20543_at   | 20543_at   | 1     | 0.93  | 2.18  | 3.19  | 2.83  | 3.45  | 2.37  |       |       |       |       |  |
|           | 3.39       | 2.84       | 1.37  | 1.18  | -0.49 | 0.63  | 1     | 2.27  | 2     | -0.26 | -1.28 | 0.88  | -     |  |
|           | 0.49       | -0.49      | 0.58  | 1.48  | 0.63  | 0.73  | 0.52  | 1.18  | 0.11  | -0.13 | -1    | 0     | -0.64 |  |
| GENE1916X | 12372_at   | 12372_at   | 1     | 0.84  | 1.85  | 2.96  | 2.65  | 2.59  | 1.9   |       |       |       |       |  |
|           | 3.44       | 2.51       | 0.58  | 0.38  | 0.51  | 0.46  | 0.68  | 1.37  | 1.32  | -0.57 | 0.12  | 0.85  |       |  |
|           | 0.16       | 0.09       | 0.63  | 1.64  | 1.37  | 1.04  | 0.44  | 0.69  | 0.07  | 0.01  | -0.18 | 0.21  | -     |  |
|           | 0.2        |            |       |       |       |       |       |       |       |       |       |       |       |  |
| GENE1915X | 19894_at   | 19894_at   | 1     | 0.27  | 1.39  | 1.82  | 1.43  | 2.35  | 1.44  |       |       |       |       |  |
|           | 2.03       | 1.68       | 0.98  | 0.29  | 0.18  | 0.46  | 0.34  | 1.28  | 1.04  | -0.49 | -0.51 | 0.2   |       |  |
|           | 0.13       | 0.13       | 0.34  | 1.11  | 1.08  | 1.14  | 1.19  | 0.61  | 0.27  | 0.15  | 0.21  | 0.09  |       |  |
|           | 0.08       |            |       |       |       |       |       |       |       |       |       |       |       |  |
| GENE1914X | 17851_at   | 17851_at   | 1     | 0.36  | 0.87  | 1.15  | 0.96  | 1.03  | 1     |       |       |       |       |  |
|           | 0.73       | 0.75       | 0.34  | 0.65  | 0.2   | 0.26  | 0.26  | 0.28  | 0.46  | -0.12 | -0.02 | 0.22  |       |  |
|           | 0.2        | 0.05       | 0.11  | 0.16  | 0.55  | 0.51  | 0.26  | 0.55  | 0.4   | 0.07  | 0.01  | -0.15 |       |  |
|           | 0.07       |            |       |       |       |       |       |       |       |       |       |       |       |  |
| GENE1820X | 18590_at   | 18590_at   | 1     | 2.73  | 2.35  | 1.11  | 2.36  | 3.48  | 2.91  |       |       |       |       |  |
|           | 3.35       | 3.47       | 1.17  | -1.15 | -0.91 | 0.77  | 0.84  | 2     | -0.35 | -2.83 | -2.12 | 1     | -     |  |
|           | 1.12       | -0.3       | -0.21 | 2.39  | 0.8   | 0.57  | 0.07  | -0.18 | -0.66 | 0.2   | 0.71  | -1.25 | -0.91 |  |
| GENE1819X | 13589_at   | 13589_at   | 1     | 0.68  | 2.74  | 0.44  | 0.94  | 1.22  | 1.53  |       |       |       |       |  |
|           | 2.21       | 2.29       | 0.89  | -0.39 | 0.04  | 1     | 1.7   | 0.7   | -0.45 | -0.49 | -0.76 | 0.04  | -     |  |
|           | 0.91       | -1         | -0.51 | 1.22  | 0.26  | 0.91  | 0.71  | 0.29  | 0.76  | 0.58  | 0     | 0.12  | 0.08  |  |
| GENE2633X | 16346_at   | 16346_at   | 1     | 0.26  | 1.58  | 4.21  | 3.29  | 3.13  | 0.84  |       |       |       |       |  |
|           | 2.92       | 3.67       | 0     | 0     | 0     | 0     | 0     | 0     | 0     | 0     | 0     | 0     | 0     |  |
|           | 0          | 0          | 0     | 0     | 0     | 0     | 0     | 0     | 0     | 0     | 0     | 0     | 0     |  |
| GENE2632X | 15547_at   | 15547_at   | 1     | 0     | 2.58  | 5.29  | 3.35  | 2.26  | 0     |       |       |       |       |  |
|           | 3.63       | 2.43       | 0     | 0     | 0     | 0     | 0     | 0     | 0     | 0     | 0     | 0     | 0     |  |
|           | 0          | 0          | 0     | 0     | 0     | 0     | 0     | 0     | 0     | 0     | 0     | 0     | 0     |  |
| GENE2631X | 12325_at   | 12325_at   | 1     | 0.61  | 1.38  | 4.84  | 3.2   | 2.28  | 0.64  |       |       |       |       |  |
|           | 2.29       | 1.37       | -0.3  | -0.49 | -0.73 | -0.12 | -0.71 | -1.15 | 0.09  | -0.59 | -0.91 | -1.12 | -     |  |
|           | 0.21       | 1.11       | 0.71  | -0.3  | 0.61  | 0.37  | 0.29  | -1.18 | -0.23 | -0.49 | 0.35  | 0.11  | 0.41  |  |
| GENE1476X | 16108_s_at | 16108_s_at | 1     | 0.73  | 0.53  | 3.01  | 1.8   | 0.99  | -0.13 |       |       |       |       |  |
|           | 1.46       | 0.26       | -0.13 | -0.26 | -0.39 | -0.39 | -0.71 | -0.3  | 0.17  | -0.21 | -0.25 | -0.08 |       |  |
|           | 0.37       | -0.16      | 0.12  | 0.38  | -0.08 | -0.66 | -0.53 | 0.04  | 0.6   | 0.17  | 0.07  | -0.13 | -     |  |
|           | 0.12       |            |       |       |       |       |       |       |       |       |       |       |       |  |
| GENE1475X | 16335_at   | 16335_at   | 1     | -0.04 | 0.94  | 1.87  | 1.08  | 0.65  | -0.21 |       |       |       |       |  |
|           | 1.22       | 0.42       | -0.32 | 0.09  | 0.22  | -0.08 | -0.32 | 0.08  | 0.6   | -0.3  | -0.1  | -0.13 | -     |  |
|           | 0.05       | -0.28      | -0.23 | -0.39 | -0.97 | -0.81 | -0.37 | -0.32 | 0.37  | -0.1  | 0.27  | -0.21 | 0.08  |  |
| GENE1474X | 14475_at   | 14475_at   | 1     | 1.26  | 2.22  | 2.15  | 2.24  | 1.36  | -0.88 |       |       |       |       |  |
|           | 2.39       | 1.46       | 0     | -0.1  | 0.21  | 0.04  | 0.08  | 0.81  | 0.33  | -0.05 | -0.26 | 0     | -     |  |
|           | 0.51       | -0.94      | -0.83 | -0.64 | -1.28 | -1.08 | -0.53 | -0.73 | -1.32 | -0.51 | -0.3  | -0.47 | 0.15  |  |
| GENE1473X | 16334_s_at | 16334_s_at | 1     | -0.1  | 1.02  | 1.31  | 0.41  | 1.06  | 0.09  |       |       |       |       |  |
|           | 1.27       | 0.51       | -0.04 | -0.35 | -0.26 | -0.12 | -0.05 | 0.01  | 0.17  | -0.34 | -0.2  | -0.53 | -     |  |
|           | 0.59       | -0.64      | -0.59 | -0.04 | -0.78 | -0.49 | -0.02 | -0.16 | -0.23 | -0.23 | -0.2  | -0.26 | -0.23 |  |





|           |            |       |            |       |       |       |       |       |       |       |       |       |   |
|-----------|------------|-------|------------|-------|-------|-------|-------|-------|-------|-------|-------|-------|---|
|           | 0.36       | -0.45 | 0.2        | 0.47  | 0.44  | 0.33  | 0.11  | 0.31  | -0.02 | 0     | 0.11  | 0.01  |   |
|           | 0.13       |       |            |       |       |       |       |       |       |       |       |       |   |
| GENE1923X | 19364_at   |       | 19364_at   |       |       | 1     | 0.66  | 0.8   | 1.14  | 1.52  | 1.87  | 1.07  | 1 |
|           | 0.11       | 0.52  | -0.05      | 0.6   | 0.53  | 0.43  | 0.17  | 0.13  | 0.17  | -0.25 | 0.46  | 0.5   | - |
| 0.23      | 0.13       | 0.79  | 0.29       | 0.21  | -0.08 | 0.57  | 0.13  | -0.64 | -0.18 | 0.25  | -0.15 |       |   |
| GENE2269X | 19878_at   |       | 19878_at   |       |       | 1     | 1.71  | 2.45  | 2.19  | 3.32  | 3.73  | 2.87  |   |
|           | 1.7        | 1.61  | 2.32       | 1.26  | 2.3   | 2     | 2.03  | 1.11  | 1.72  | 0.41  | 0.2   | 2.46  |   |
|           | 2.19       | -0.34 | 0.72       | 2.46  | -0.23 | 0     | 0.29  | -0.25 | -0.07 | 0.08  | 0.08  | -1.05 | - |
| 0.13      |            |       |            |       |       |       |       |       |       |       |       |       |   |
| GENE2019X | 17744_s_at |       | 17744_s_at |       |       | 1     | 1.52  | 2.19  | 1.89  | 2.15  | 2.53  | 2.34  |   |
|           | 1.53       | 1.36  | 1.17       | 0.97  | 1.07  | 1.76  | 1.73  | 1.07  | 1.48  | 0.7   | -0.1  | 1.03  |   |
|           | 0.41       | -0.57 | 0.44       | 0.82  | 0.08  | -0.2  | 0.18  | 0.18  | -0.43 | -0.05 | -0.1  | -0.83 | - |
| 0.18      |            |       |            |       |       |       |       |       |       |       |       |       |   |
| GENE1919X | 16483_at   |       | 16483_at   |       |       | 1     | 0.85  | 1.53  | 2     | 2     | 3.11  | 2.22  |   |
|           | 1.18       | 0.77  | 1.93       | 0.88  | 0.58  | 0.88  | 1.11  | 0.83  | 1.22  | 0.28  | 0.23  | 0.68  |   |
|           | 0.07       | -0.26 | 0          | 1.93  | 0.28  | 0.28  | 0.73  | -0.32 | -0.25 | 0.29  | 0.29  | -0.51 | - |
| 0.26      |            |       |            |       |       |       |       |       |       |       |       |       |   |
| GENE1986X | 20517_at   |       | 20517_at   |       |       | 1     | 0.27  | 1.33  | 0.38  | 0.68  | 1.89  | 1.79  |   |
|           | 0.87       | 0.87  | 0.73       | 0.65  | 0.34  | 0.86  | 1.04  | -0.04 | 0.64  | -1.12 | -1.15 | 0.68  |   |
|           | 0.08       | 0.16  | 0.41       | 0.81  | -0.05 | -0.47 | -0.26 | 0.04  | -0.12 | 0.23  | 0.41  | -0.15 | - |
| 0.13      |            |       |            |       |       |       |       |       |       |       |       |       |   |
| GENE1985X | 12883_at   |       | 12883_at   |       |       | 1     | 0.17  | 0.93  | 0.7   | 0.94  | 1.29  | 1.81  |   |
|           | 0.56       | 1.08  | 0.79       | 0.18  | 0.28  | 1.13  | 0.61  | 0.61  | 0.74  | 0.09  | -0.88 | 0.54  |   |
|           | 0.43       | -0.32 | 0.07       | 0.8   | -0.25 | -0.55 | -0.28 | 0     | 0.02  | -0.15 | 0.05  | -0.32 | - |
| 0.05      |            |       |            |       |       |       |       |       |       |       |       |       |   |
| GENE1984X | 15473_at   |       | 15473_at   |       |       | 1     | -0.2  | 1.02  | 0.28  | 0.32  | 1.03  | 1.13  |   |
|           | 0.4        | 0.27  | 0.48       | 0.09  | 0.09  | 1.22  | 1.05  | 0.26  | 0.16  | 0.38  | -0.21 | 0.09  | - |
| 0.04      | -0.13      | 0     | 0.89       | -0.1  | -0.26 | 0.07  | 0.26  | -0.18 | -0.13 | 0.02  | -0.45 | -0.43 |   |
| GENE1983X | 20618_at   |       | 20618_at   |       |       | 1     | 0.43  | 0.51  | 0.43  | 0.02  | 1     | 0.76  |   |
|           | 0.31       | 0.12  | 0.49       | 0.22  | 0.43  | 0.49  | 0.56  | 0.29  | 0.11  | 0.4   | 0.05  | 0.33  |   |
|           | 0.05       | 0.01  | -0.07      | 0.32  | -0.16 | -0.08 | -0.01 | 0.4   | 0.15  | -0.05 | -0.07 | 0.02  | - |
| 0.1       |            |       |            |       |       |       |       |       |       |       |       |       |   |
| GENE1967X | 13467_at   |       | 13467_at   |       |       | 1     | 1.14  | 3.59  | 3.57  | 3.55  | 3.58  | 2.67  |   |
|           | 4.13       | 4.65  | 2.12       | 2.37  | 1.89  | 3.36  | 3.14  | 4.26  | 1.93  | 0.62  | 1.07  | 1.58  |   |
|           | 2.3        | -0.12 | -0.07      | 1.32  | -1.32 | -1.21 | -0.51 | 0.33  | -1.47 | -1.32 | -0.68 | 0.64  |   |
| 0.47      |            |       |            |       |       |       |       |       |       |       |       |       |   |
| GENE1966X | 18234_at   |       | 18234_at   |       |       | 1     | -0.07 | 0.92  | 1.13  | 0.79  | 1.07  | 0.84  |   |
|           | 1.24       | 0.94  | 0.53       | 0.36  | 0.47  | 0.69  | 0.54  | 0.55  | 0.41  | 0.25  | 0     | 0.28  |   |
|           | 0.16       | 0.28  | -0.12      | 0.65  | 0.25  | -0.26 | -0.23 | 0.23  | 0.04  | -0.05 | -0.04 | 0.02  |   |
| 0.05      |            |       |            |       |       |       |       |       |       |       |       |       |   |
| GENE1965X | 16092_s_at |       | 16092_s_at |       |       | 1     | 0.47  | 1.39  | 0.97  | 1.09  | 1     | 1.58  |   |
|           | 1.75       | 1.69  | 1.19       | 0.34  | 0.55  | 1.07  | 0.97  | 1.64  | 0.53  | 0.01  | -0.08 | 0.55  | - |
| 0.04      | -0.41      | 0.12  | 0.69       | -0.26 | -0.26 | 0.13  | 0.11  | 0.44  | 0.12  | 0.22  | -0.49 | 0.2   |   |
| GENE1974X | 16087_s_at |       | 16087_s_at |       |       | 1     | 2.05  | 1.82  | 2.1   | 1.78  | 2.86  | 2.05  |   |
|           | 2.12       | 2.2   | 1.5        | 0.17  | 0.04  | 0.75  | 0.91  | 1.63  | 1.09  | 0.4   | 0.36  | 0.16  |   |
|           | 0.01       | -0.41 | -0.37      | 1.2   | 0.07  | 0.09  | -0.01 | 0.16  | -0.57 | -0.3  | -0.64 | -0.49 | - |
| 0.16      |            |       |            |       |       |       |       |       |       |       |       |       |   |
| GENE1973X | 16301_at   |       | 16301_at   |       |       | 1     | 1.86  | 2.53  | 2.03  | 1.93  | 2.48  | 2.08  |   |
|           | 2.44       | 2.55  | 1.04       | 0.76  | 0.42  | 0.79  | 1.13  | 1.51  | 1.43  | 0.12  | 0.65  | 0.38  |   |
|           | 0.09       | -0.25 | 0.05       | 0.65  | 0.25  | 0.27  | 0.27  | 0.08  | -0.2  | -0.15 | -0.05 | -0.53 | - |
| 0.25      |            |       |            |       |       |       |       |       |       |       |       |       |   |
| GENE1972X | 15223_s_at |       | 15223_s_at |       |       | 1     | 0.61  | 1.11  | 1.11  | 1.08  | 1.56  | 0.97  |   |
|           | 1.13       | 1.05  | 0.41       | 0.29  | 0.02  | 0.34  | 0.22  | 0.74  | 0.33  | 0.02  | 0.26  | -0.15 | - |
| 0.23      | 0.09       | 0.11  | 0.52       | 0.18  | 0     | 0     | -0.04 | -0.04 | -0.07 | -0.07 | -0.15 | 0.04  |   |
| GENE1971X | 18948_s_at |       | 18948_s_at |       |       | 1     | 0.53  | 0.79  | 1.02  | 1.05  | 1.31  | 1.48  |   |
|           | 1.26       | 1.1   | 0.58       | 0.35  | 0.38  | 0.47  | 0.43  | 0.85  | 0.36  | 0.01  | 0.26  | 0.08  |   |









|           |            |            |       |       |       |       |       |       |       |       |       |       |       |
|-----------|------------|------------|-------|-------|-------|-------|-------|-------|-------|-------|-------|-------|-------|
| GENE2009X | 18242_g_at | 18242_g_at | 1     | 0.75  | 1.18  | 1.26  | 1.04  | 1.23  | 2.59  |       |       |       |       |
|           | 1.53       | 1.96       | 1     | 0.94  | 0.85  | 1.01  | 0.8   | 1.3   | 1.73  | 0.49  | 0.09  | 0.9   |       |
|           | 0.92       | -0.2       | -0.23 | 0.9   | 0     | -0.04 | -0.39 | -0.28 | -0.73 | -0.43 | 0.32  | 0.21  |       |
|           | 0.36       |            |       |       |       |       |       |       |       |       |       |       |       |
| GENE2566X | 18935_at   | 18935_at   | 1     | 3.33  | 3.26  | 2.18  | 3.13  | 1.7   | 2     |       |       |       |       |
|           | 2.13       | 3.4        | 0.34  | 2.15  | 1.07  | 2.13  | 2.37  | 1.84  | 2.21  | 0.26  | 1.53  | 2.15  |       |
|           | 1.95       | 1.17       | 3.58  | 1.06  | 1.58  | 0.81  | 0     | 1.08  | 1.84  | 1.76  | 2.26  | -0.25 | -     |
|           | 0.25       |            |       |       |       |       |       |       |       |       |       |       |       |
| GENE2565X | 20215_s_at | 20215_s_at | 1     | 0.34  | 1.04  | 0.95  | 0.79  | 0.54  | 0.48  |       |       |       |       |
|           | 1.18       | 0.94       | 0.27  | 0.52  | 0.67  | 0.73  | 0.57  | 0.83  | 0.62  | 0.34  | 0.27  | 0.48  |       |
|           | 0.22       | 0.38       | 0.71  | 0.43  | 0.33  | 0.43  | -0.08 | 0.63  | 0.65  | 0.42  | 0.33  | 0.11  | -     |
|           | 0.04       |            |       |       |       |       |       |       |       |       |       |       |       |
| GENE2564X | 19161_at   | 19161_at   | 1     | 0.46  | 1.11  | 1.03  | 0.62  | 1.1   | 1.35  |       |       |       |       |
|           | 1.13       | 1          | 0.37  | 0.74  | 0.17  | 0.75  | 0.51  | 0.97  | 1     | 0.46  | 0.65  | 0.58  | -     |
|           | 0.15       | -0.13      | 1.05  | 0.43  | -0.13 | 0.37  | 0.27  | 0     | 0.71  | 1     | 0.88  | -0.57 | -0.34 |
| GENE2563X | 13468_at   | 13468_at   | 1     | 0.37  | 0.84  | 1.11  | 0.48  | 0.22  | 1.3   |       |       |       |       |
|           | 1.09       | 0.53       | 0.37  | 0.58  | -0.3  | 0.62  | 0.36  | 0.7   | 1.19  | 0.15  | 0.75  | 0.08  |       |
|           | 0.35       | 0.29       | 0.73  | 0.6   | 0.04  | 0.41  | -0.41 | 0.42  | 0.16  | 0.32  | 0.11  | -0.05 | -     |
|           | 0.18       |            |       |       |       |       |       |       |       |       |       |       |       |
| GENE2567X | 15874_at   | 15874_at   | 1     | 0.44  | 1.65  | 2     | 2.32  | 0.68  | 1.88  |       |       |       |       |
|           | 1.32       | 2.36       | -1.12 | 0.37  | 0.32  | 0     | 0.65  | 0.8   | 2     | -0.15 | 0.44  | 1.39  |       |
|           | 1.45       | 0.77       | 1.07  | 0.2   | 0.45  | 0.45  | 0.16  | -0.73 | 0.41  | -0.37 | 0.28  | -0.49 | -     |
|           | 0.49       |            |       |       |       |       |       |       |       |       |       |       |       |
| GENE2569X | 17134_at   | 17134_at   | 1     | 3.76  | 2.2   | 1.87  | 2.84  | 2.84  | 5.39  |       |       |       |       |
|           | 1.67       | 5.71       | 0     | -0.26 | 0     | 0     | 1.67  | 2     | 4.45  | 0     | 0     | 3.03  |       |
|           | 2.76       | 2.32       | 2.8   | 1.37  | 0.48  | 0     | 0     | 0     | 0     | 0     | 0     | 0     | 0     |
| GENE2568X | 13919_at   | 13919_at   | 1     | 3     | 1.67  | 2.07  | 2.58  | 1.84  | 5.05  |       |       |       |       |
|           | 2.32       | 5.37       | 1     | -0.32 | 0     | 0.26  | 1.67  | 2.88  | 3.32  | 0.26  | 0     | 2.8   |       |
|           | 1.92       | 0          | 0.48  | 0.26  | 0     | 0     | 0     | 0     | 0     | 0     | 0     | 0     | 0     |
| GENE2561X | 14017_at   | 14017_at   | 1     | 2.26  | 1.76  | 2.27  | 2.8   | 1.92  | 4.07  |       |       |       |       |
|           | 2.2        | 3.76       | 0     | 2.11  | 0.84  | 0.48  | 2.13  | 2.8   | 4.82  | 0     | 0     | 2.32  |       |
|           | 1.26       | 0.67       | 0.84  | 0     | 0     | 0     | 0     | 0     | 0     | 0     | 0     | 0     | 0     |
| GENE2558X | 18625_at   | 18625_at   | 1     | 1.54  | 0.58  | 0.84  | 1.06  | 0.67  | 1.05  |       |       |       |       |
|           | 0.92       | 1.13       | -0.02 | 0.61  | 0.6   | 0.26  | 0.26  | 0.9   | 0.97  | 0.25  | -0.18 | 0.96  |       |
|           | 0.96       | 0.67       | 0.46  | 0.48  | 0.31  | 0.31  | 0.54  | -0.39 | 0.18  | 0.35  | 0.55  | -0.05 |       |
|           | 0.18       |            |       |       |       |       |       |       |       |       |       |       |       |
| GENE2555X | 17291_at   | 17291_at   | 1     | 1.89  | 1.39  | 1.94  | 0.65  | 0.52  | 1.82  |       |       |       |       |
|           | 1.32       | 2.56       | -0.86 | 0     | -0.49 | -0.41 | 0.32  | 0.76  | 1.09  | 0     | 0.18  | 0.35  |       |
|           | 1.43       | 0.63       | 1.67  | -0.37 | -0.37 | 0.15  | -0.37 | 0     | 0.48  | 0.67  | 0.26  | 0.28  |       |
|           | 0.28       |            |       |       |       |       |       |       |       |       |       |       |       |
| GENE2554X | 19741_at   | 19741_at   | 1     | 1.23  | 1     | 1.54  | 0.2   | 0.43  | 0.93  |       |       |       |       |
|           | 1.23       | 1.61       | -0.73 | 0.41  | 0.37  | 0.59  | 0     | 0.8   | 1     | -0.37 | -0.47 | 0.09  | 0     |
|           | 0.21       | 0.58       | -0.68 | -0.53 | 0.29  | -0.25 | -0.59 | 0.58  | -0.26 | 0.21  | -0.41 | 0.11  |       |
| GENE1896X | 12802_at   | 12802_at   | 1     | 1.52  | 2.34  | 2.72  | 2.51  | 1.38  | 1     |       |       |       |       |
|           | 4.22       | 4.3        | 0.27  | 0.42  | -0.12 | 0.72  | 0.73  | 3.47  | 0.29  | -0.81 | 0.33  | 0.2   |       |
|           | 0.28       | -0.35      | -0.59 | 0.53  | -0.32 | -0.1  | 0.02  | 0.12  | -0.41 | 0.52  | 0.53  | -0.2  | -     |
|           | 0.37       |            |       |       |       |       |       |       |       |       |       |       |       |
| GENE1895X | 15497_at   | 15497_at   | 1     | 0.87  | 1.32  | 1.11  | 1.02  | 1.22  | 1.03  |       |       |       |       |
|           | 2.13       | 2.35       | 0.23  | 0.57  | 0.4   | 0.55  | 0.5   | 1.56  | 0.56  | -0.2  | 0.17  | 0.45  | -     |
|           | 0.59       | -0.49      | -0.53 | -0.08 | -0.32 | -0.34 | -0.2  | -0.39 | -0.39 | -0.39 | -0.21 | -0.25 | -0.13 |
| GENE1894X | 14721_s_at | 14721_s_at | 1     | 0.25  | 0.28  | 0.87  | 0.53  | 0.38  | 0.46  |       |       |       |       |
|           | 1.07       | 0.93       | 0.08  | 0.32  | -0.13 | 0.18  | 0.04  | 0.66  | 0.38  | -0.2  | -0.15 | -0.15 |       |
|           | 0.25       | -0.05      | 0     | 0.18  | -0.18 | 0.07  | -0.08 | -0.12 | 0.09  | -0.08 | -0.04 | -0.13 | -     |
|           | 0.15       |            |       |       |       |       |       |       |       |       |       |       |       |
| GENE1893X | 15667_s_at | 15667_s_at | 1     | 0.44  | 0.22  | 0.47  | 0.43  | 0.28  | 0.81  |       |       |       |       |
|           | 0.75       | 1.12       | 0.07  | -0.13 | 0.04  | 0.08  | 0.15  | 0.31  | 0.07  | 0.11  | 0.15  | 0.02  |       |





|           |            |            |      |       |       |       |       |       |       |       |       |       |   |
|-----------|------------|------------|------|-------|-------|-------|-------|-------|-------|-------|-------|-------|---|
| GENE2260X | 18884_at   | 18884_at   | 1    | 0.65  | 1.29  | 1.06  | 1.07  | 1.44  | 2.07  |       |       |       |   |
|           | 0.91       | 1.22       | 0.08 | 0.62  | 0.82  | 0.7   | 0.44  | 0.68  | 0.85  | 0.21  | 0.11  | 1.58  |   |
|           | 0.82       | 0.75       | 0.16 | 0.73  | 1.18  | 1     | 1.32  | 0.21  | -0.68 | -0.2  | -0.55 | 0     |   |
|           | 0.09       |            |      |       |       |       |       |       |       |       |       |       |   |
| GENE2220X | 14507_at   | 14507_at   | 1    | 0.4   | 0.21  | 0.87  | 0.99  | 1.31  | 1.41  |       |       |       |   |
|           | 0.96       | 0.97       | 0.88 | 0.36  | 0.52  | -0.1  | 0.16  | 0.43  | 0.26  | -0.13 | 0.11  | 0.51  |   |
|           | 0.31       | 0.28       | 0.05 | 0.5   | 0.55  | 0.55  | 0.33  | 0.12  | -0.34 | -0.18 | -0.05 | 0.09  |   |
|           | 0.09       |            |      |       |       |       |       |       |       |       |       |       |   |
| GENE1911X | 13297_at   | 13297_at   | 1    | 0.16  | 0.38  | 1.33  | 1.69  | 2     | 1.79  |       |       |       |   |
|           | 0.97       | 0.92       | 1.08 | 1.32  | 0.68  | 0.52  | 0.25  | 0.77  | 1.32  | -0.41 | 0.05  | 1.18  |   |
|           | 0.17       | 0.5        | 0.6  | 1.57  | 0.82  | 0.31  | 0.36  | 0.43  | -0.2  | -0.43 | -0.41 | 0.2   | - |
|           | 0.18       |            |      |       |       |       |       |       |       |       |       |       |   |
| GENE1906X | 14423_at   | 14423_at   | 1    | 1.22  | 0.65  | 1.26  | 0     | 2.02  | 3.09  |       |       |       |   |
|           | 1.52       | 2.2        | 1.51 | 0.93  | 0     | 0.31  | 0.52  | 1.24  | 2.02  | 0.32  | 0.07  | 0.76  |   |
|           | 1.24       | 1.3        | 1.34 | 1.88  | 0.97  | 1.35  | 0.46  | 0.2   | 0.16  | -0.53 | 0.16  | -0.21 |   |
|           | 0.02       |            |      |       |       |       |       |       |       |       |       |       |   |
| GENE1905X | 12440_at   | 12440_at   | 1    | 0.4   | 0.21  | 0.33  | 0.09  | 0.85  | 2.31  |       |       |       |   |
|           | 0.28       | 1.21       | 0.77 | 0.6   | 0.41  | 0.15  | 0.07  | 0.51  | 1.42  | -0.32 | -0.05 | 0.62  |   |
|           | 1.13       | 0.22       | 0.01 | 1.12  | -0.21 | 0.15  | -0.18 | 0.25  | 0.01  | -0.25 | 0.11  | -0.15 | - |
|           | 0.23       |            |      |       |       |       |       |       |       |       |       |       |   |
| GENE1904X | 14552_s_at | 14552_s_at | 1    | -0.37 | -0.1  | 1.51  | 0.73  | 1.84  | 4.18  |       |       |       |   |
|           | 1.39       | 3.25       | 0.84 | 0.77  | 0.52  | -0.55 | -0.3  | 2.06  | 1.89  | -0.18 | 0.73  | 0.52  |   |
|           | 0.73       | 1.51       | 1    | 1.67  | 1.13  | 1.26  | 1.92  | 0.18  | 1     | 0.84  | 0.48  | 0.18  | 0 |
| GENE1903X | 15043_at   | 15043_at   | 1    | 0.18  | 0.18  | 0.37  | 0.6   | 0.76  | 1.18  |       |       |       |   |
|           | 0.04       | 0.69       | 0.45 | 0.73  | 0.48  | 0.16  | 0.01  | 0.65  | 0.54  | -0.1  | 0.04  | 0.32  |   |
|           | 0.32       | 0.31       | 0    | 0.65  | 0.53  | 0.53  | 0.42  | 0.31  | 0.09  | 0.16  | 0.2   | 0.05  | - |
|           | 0.04       |            |      |       |       |       |       |       |       |       |       |       |   |
| GENE2421X | 20627_at   | 20627_at   | 1    | 1.04  | -0.51 | 1.18  | 0.83  | 0.7   | 1.01  |       |       |       |   |
|           | 0.65       | 0.92       | 0.49 | 0.47  | 0.32  | -0.47 | 0.05  | 0.38  | 0.77  | 0.64  | -0.21 | 0.27  |   |
|           | 0.64       | 0.7        | 0.83 | 0.7   | 0.15  | 0.26  | 0.15  | 0.22  | 0.43  | 0.77  | 0.18  | 0.08  |   |
|           | 0.23       |            |      |       |       |       |       |       |       |       |       |       |   |
| GENE1910X | 16840_at   | 16840_at   | 1    | 1.24  | 0.37  | 2.62  | 2.2   | 3.05  | 3.36  |       |       |       |   |
|           | 0.67       | 0.5        | 2.05 | 1.06  | 0.69  | -1.64 | -1.18 | 0.02  | 1.23  | -0.51 | -0.76 | 1.7   |   |
|           | 3.4        | 0.64       | 1.28 | 2.96  | 0.45  | 0.32  | 0.2   | 2.7   | 0.47  | 0.05  | -0.21 | 0.72  | - |
|           | 0.49       |            |      |       |       |       |       |       |       |       |       |       |   |
| GENE1909X | 12600_at   | 12600_at   | 1    | 0.4   | 0.13  | 1.49  | 0.7   | 1.19  | 1.59  |       |       |       |   |
|           | 0.78       | 1.03       | 0.41 | 0.76  | -0.2  | -0.64 | -0.39 | 0.32  | 0.65  | -0.57 | -0.43 | 0.42  |   |
|           | 0.67       | -0.12      | 0.28 | 0.34  | -0.08 | 0.04  | -0.08 | 1.27  | -0.18 | 0.11  | -0.08 | 0.27  | - |
|           | 0.41       |            |      |       |       |       |       |       |       |       |       |       |   |
| GENE2418X | 15174_f_at | 15174_f_at | 1    | 1.35  | 0.37  | 0.75  | 1.04  | 1.02  | 1.09  |       |       |       |   |
|           | 0.84       | 0.71       | 0.45 | -0.51 | 0.16  | 0.04  | 0.21  | -0.04 | -0.15 | 0.88  | 0.82  | 0.38  |   |
|           | 0.28       | 0.05       | 0.28 | 0.87  | 0.42  | 0.25  | 0.04  | 0.33  | -0.12 | -0.25 | -0.05 | 0     |   |
|           | 0.08       |            |      |       |       |       |       |       |       |       |       |       |   |
| GENE2419X | 16043_at   | 16043_at   | 1    | 3.51  | 2.14  | 1.18  | 2.08  | 3.07  | 3.45  |       |       |       |   |
|           | 1.56       | 2.17       | 2.08 | -1.08 | 0.08  | -1    | 0.94  | 0.91  | 0     | 1.2   | 1.58  | 1.12  |   |
|           | 1.58       | 0.72       | 1.17 | 2.45  | 0.34  | 0.75  | -0.41 | 1.38  | 0.73  | 0.94  | 0.41  | -0.1  |   |
|           | 0.08       |            |      |       |       |       |       |       |       |       |       |       |   |
| GENE2224X | 13825_s_at | 13825_s_at | 1    | 1.98  | 0.56  | 0.97  | 1.22  | 1.67  | 2.02  |       |       |       |   |
|           | 1.3        | 1.43       | 0.72 | 0     | -0.1  | 0     | 0.21  | 0.37  | 0.23  | 0.5   | 0.85  | 0.25  |   |
|           | 0.64       | 0.88       | 0.83 | 1.34  | 0.71  | 0.61  | 0.43  | 0.48  | 0.18  | 0.13  | 0     | -0.07 |   |
|           | 0.04       |            |      |       |       |       |       |       |       |       |       |       |   |
| GENE2243X | 17964_at   | 17964_at   | 1    | 0.71  | 1.12  | 1.33  | 1.18  | 1.98  | 2.05  |       |       |       |   |
|           | 0.7        | 0.29       | 1.28 | 0.05  | 0.31  | 0.36  | 0.58  | 0.2   | 0.79  | 0.08  | 0.2   | 0.91  |   |
|           | 1.01       | 0.82       | 0.51 | 1.42  | 0.32  | 0.28  | 0.34  | 0.6   | 0.01  | -0.08 | 0     | 0.22  |   |
|           | 0.08       |            |      |       |       |       |       |       |       |       |       |       |   |
| GENE2241X | 14884_at   | 14884_at   | 1    | 1.68  | 1.97  | 1.36  | 1.83  | 3.15  | 3.2   |       |       |       |   |
|           | 1.16       | 1.23       | 1.91 | -1.39 | 0.08  | 0.29  | 0.91  | 0.43  | 0.29  | 0.17  | 0.51  | 1.04  |   |

|           |            |       |            |       |       |       |       |       |       |       |       |       |      |
|-----------|------------|-------|------------|-------|-------|-------|-------|-------|-------|-------|-------|-------|------|
|           | 1.64       | 1.4   | 1.09       | 2.48  | 1.61  | 1.38  | 1     | 1.62  | 0.05  | 0.22  | 0.22  | 0     | -    |
| 0.32      |            |       |            |       |       |       |       |       |       |       |       |       |      |
| GENE2240X | 16908_at   |       | 16908_at   |       | 1     | 0.87  | 0.88  | 1.13  | 0.94  | 1.38  | 1.16  |       |      |
|           | 0.75       | 0.49  | 0.68       | -0.34 | 0.42  | 0.4   | 0.63  | -0.07 | -0.07 | 0.58  | 0.55  | 0.32  |      |
|           | 0.35       | 0.38  | -0.04      | 0.97  | 0.65  | 0.41  | 0.53  | 0.61  | -0.16 | -0.04 | 0.09  | 0.23  |      |
|           | 0.18       |       |            |       |       |       |       |       |       |       |       |       |      |
| GENE2238X | 12217_at   |       | 12217_at   |       | 1     | 0.84  | 0.83  | 0.93  | 0.94  | 1.3   | 1.24  |       |      |
|           | 1.08       | 0.73  | 0.75       | -0.01 | 0.32  | 0.32  | 0.42  | 0.57  | 0.36  | 0.22  | 0.2   | 0.44  |      |
|           | 0.72       | 0.45  | 0.38       | 1     | 0.35  | 0.53  | 0.42  | 0.59  | -0.37 | 0     | -0.64 | 0.02  |      |
|           | 0.11       |       |            |       |       |       |       |       |       |       |       |       |      |
| GENE2237X | 18698_s_at |       | 18698_s_at |       | 1     | 0.76  | 0.76  | 0.87  | 0.77  | 1.29  | 1.52  |       |      |
|           | 1.36       | 1.25  | 0.92       | -0.16 | 0.13  | 0.21  | 0.36  | 0.46  | -0.15 | 0.09  | 0.12  | 0.41  |      |
|           | 0.55       | 0.42  | -0.12      | 1.31  | 0.61  | 0.66  | 0.54  | 0.54  | -0.05 | -0.08 | -0.08 | 0.23  |      |
|           | 0.04       |       |            |       |       |       |       |       |       |       |       |       |      |
| GENE2236X | 14136_at   |       | 14136_at   |       | 1     | 0.37  | 0.68  | 0.95  | 0.9   | 1.81  | 1.45  |       |      |
|           | 0.73       | 0.87  | 1.26       | 0     | 0.64  | 0.27  | 0.53  | 0.47  | -0.07 | 0.65  | 0.02  | 0.59  |      |
|           | 0.64       | 0     | 0.16       | 1     | 0.34  | 0.02  | 0.52  | 0.02  | -0.15 | -0.2  | -0.05 | 0.11  |      |
|           | 0.02       |       |            |       |       |       |       |       |       |       |       |       |      |
| GENE2235X | 20718_at   |       | 20718_at   |       | 1     | 0.12  | 0.65  | 1.18  | 0.97  | 1.15  | 1.09  |       |      |
|           | 0.96       | 0.73  | 0.89       | -0.28 | 0.33  | 0.07  | 0.22  | 0.28  | -0.13 | 0     | 0.21  | 0.26  |      |
|           | 0.81       | -0.07 | -0.34      | 1.23  | 0.32  | 0.16  | 0.52  | 0.49  | 0.18  | -0.07 | -0.26 | 0.16  | -    |
| 0.16      |            |       |            |       |       |       |       |       |       |       |       |       |      |
| GENE2234X | 13069_at   |       | 13069_at   |       | 1     | 1.09  | 0.59  | 0.69  | 0.35  | 1.56  | 1.95  |       |      |
|           | 0.69       | 0.82  | 1.23       | -0.45 | -0.05 | -0.1  | 0.5   | 0.22  | -0.23 | -0.02 | 0.73  | 0.04  |      |
|           | 0.32       | 0.07  | 0.28       | 1.64  | 0.61  | 0.31  | 0.47  | 0.36  | -0.12 | -0.02 | -0.01 | 0.13  |      |
|           | 0.11       |       |            |       |       |       |       |       |       |       |       |       |      |
| GENE2233X | 13564_at   |       | 13564_at   |       | 1     | 1.53  | 1.25  | 1.52  | 1.26  | 2.38  | 2.13  |       |      |
|           | 1.36       | 1.11  | 1.21       | 0     | 0     | 0.11  | 0.41  | 0.29  | 0.44  | 0.01  | 0.15  | 0.26  |      |
|           | 0.41       | 0.11  | 0.44       | 1.41  | 0.36  | 0.22  | 0.09  | 0.07  | 0.01  | 0.32  | 0.16  | -0.26 | -    |
| 0.02      |            |       |            |       |       |       |       |       |       |       |       |       |      |
| GENE2232X | 13106_at   |       | 13106_at   |       | 1     | 0.27  | 0.17  | 0.43  | 0.41  | 0.95  | 1.04  |       |      |
|           | 0.52       | 0.65  | 0.51       | -0.01 | 0.05  | 0.17  | 0.25  | 0.17  | 0.18  | 0.11  | 0.18  | 0.26  |      |
|           | 0.05       | 0.04  | 0.05       | 0.84  | 0.21  | 0.13  | 0.11  | 0.2   | -0.1  | 0.07  | 0     | -0.12 | -    |
| 0.02      |            |       |            |       |       |       |       |       |       |       |       |       |      |
| GENE2218X | 19698_at   |       | 19698_at   |       | 1     | 0.4   | -0.04 | 0.73  | 0.69  | 1.23  | 1.28  |       | -    |
|           | 0.13       | 0.44  | 0.84       | 0.37  | 0.26  | 0.01  | 0.37  | 0.22  | 0.41  | 0.12  | 0.25  | 0.37  | 0.55 |
|           | 0.37       | 0.4   | 0.68       | 1.03  | 0.89  | 1.05  | 0.46  | -0.66 | 0.12  | 0.17  | 0.02  | 0     |      |
| GENE2217X | 15129_at   |       | 15129_at   |       | 1     | 0.94  | 0.25  | 1.05  | 1.07  | 1.18  | 1.41  |       | -    |
|           | 0.04       | 0.13  | 0.79       | 0.5   | 0.49  | 0.12  | 0.08  | -0.04 | 0.64  | 0.29  | 0.38  | 0.47  | 0.65 |
|           | 0.21       | 0     | 0.73       | 0.59  | 0.52  | 0.56  | 0.65  | -0.41 | -0.05 | -0.41 | 0.11  | -0.01 |      |
| GENE2216X | 15884_at   |       | 15884_at   |       | 1     | 0.8   | 0.76  | 1.09  | 0.79  | 1     | 1.23  |       |      |
|           | 0.05       | 0.4   | 0.18       | 0.28  | 0.37  | -0.13 | 0.22  | -0.04 | 0.7   | 0     | -0.15 | 0.64  |      |
|           | 1.02       | -0.28 | 0          | 0.47  | 0.47  | 0.55  | 0.51  | 0.21  | -0.78 | -0.45 | 0     | 0.64  |      |
|           | 0.33       |       |            |       |       |       |       |       |       |       |       |       |      |
| GENE1810X | 12274_at   |       | 12274_at   |       | 1     | 0.28  | 0.71  | 1.07  | 0.62  | 1.91  | 1.78  |       |      |
|           | 0.34       | 0.73  | 0.95       | 0.18  | -0.21 | -0.39 | 0.15  | 0.31  | 0.15  | -0.25 | -0.07 | -0.13 | -    |
|           | 0.04       | 0.62  | 0.72       | 0.78  | 1.03  | 0.91  | 1.44  | 0.36  | -0.08 | -0.04 | 0.07  | 0     |      |
| GENE1809X | 17732_at   |       | 17732_at   |       | 1     | 0.86  | 1.03  | 0.76  | 0.91  | 1.79  | 1.49  |       |      |
|           | 1.01       | 0.79  | 0.62       | -0.68 | -0.23 | -0.71 | 0.07  | 0.36  | -0.3  | -0.02 | 0.12  | -0.02 | -    |
|           | 0.13       | 0.09  | 0.02       | 0.77  | 0.53  | 0.45  | 0.6   | 0.51  | 0.4   | 0.48  | 0.26  | 0.04  | 0.26 |
| GENE1808X | 20645_s_at |       | 20645_s_at |       | 1     | 0     | 0.25  | 0.71  | 0.49  | 1.27  | 1.17  |       |      |
|           | 0.47       | 0.17  | 0.16       | -0.16 | 0.13  | 0.17  | -0.08 | -0.34 | 0.42  | -0.08 | 0.01  | -0.21 |      |
|           | 0.18       | 0.42  | 0          | 1.07  | 0.38  | 0.36  | 0.13  | 0.07  | 0.26  | -0.07 | 0.2   | 0.17  |      |
|           | 0.4        |       |            |       |       |       |       |       |       |       |       |       |      |
| GENE1812X | 15188_s_at |       | 15188_s_at |       | 1     | 0.79  | 0.23  | 1.54  | 1.05  | 2.75  | 2.67  |       |      |
|           | 1.05       | 1.34  | 1.28       | -0.12 | -0.59 | -0.83 | -0.64 | 0.21  | -0.02 | -0.04 | -0.86 | 0.11  |      |



|           |            |            |       |       |       |       |       |       |       |       |       |       |   |
|-----------|------------|------------|-------|-------|-------|-------|-------|-------|-------|-------|-------|-------|---|
| GENE1897X | 20461_at   | 20461_at   | 1     | -0.04 | 0.2   | -0.53 | -0.35 | -0.07 | 1.65  |       |       |       |   |
|           | 1.32       | 1.93       | 0.28  | 0.34  | 0.48  | -0.35 | 0.27  | 1.83  | 0.84  | -0.08 | -0.18 | 0.5   |   |
|           | 1.4        | -0.23      | 0.08  | 0.84  | 1.16  | 1.4   | 0.93  | -0.49 | -0.91 | 0.17  | 0.43  | -0.39 |   |
|           | 0.07       |            |       |       |       |       |       |       |       |       |       |       |   |
| GENE2018X | 16510_at   | 16510_at   | 1     | 1.61  | 2.01  | 1.05  | 2.19  | 2.8   | 2     |       |       |       |   |
|           | 1.48       | 2.82       | 1.76  | 1.41  | 1.44  | 2.92  | 2.32  | 2.61  | 1.67  | 1.05  | 0.65  | 1.2   | - |
| 0.88      | 0.51       | 1.45       | 0     | 0.85  | -1.69 | -1.69 | -0.49 | -1.28 | -0.41 | -0.41 | -1.21 | -0.41 |   |
| GENE2017X | 12698_at   | 12698_at   | 1     | 2.04  | 2.35  | 2.3   | 2.5   | 1.82  | 2.73  |       |       |       |   |
|           | 2.82       | 3.43       | 1.43  | 2.18  | 2.42  | 2.56  | 2.4   | 2.65  | 2.68  | 1.4   | 1.55  | 1.89  | - |
| 0.04      | 0.17       | 0.61       | -0.3  | -0.25 | -0.68 | -0.43 | -0.13 | -2.18 | 0.01  | 0.41  | -0.45 | -0.07 |   |
| GENE2016X | 15625_at   | 15625_at   | 1     | 1.09  | 1.56  | 1     | 0.9   | 1.19  | 1.29  |       |       |       |   |
|           | 1.89       | 1.93       | 1.29  | 1.08  | 0.88  | 1.6   | 1.41  | 1.9   | 0.95  | 0.7   | 0.37  | 0.63  | - |
| 0.41      | -0.41      | 0.29       | 0.43  | 0.07  | 0.12  | -0.1  | -0.47 | -0.49 | 0.17  | 0.27  | -1    | -0.15 |   |
| GENE2015X | 14582_at   | 14582_at   | 1     | 0.59  | 0.5   | 0.31  | 0.43  | 1.02  | 1.45  |       |       |       |   |
|           | 0.36       | 0.97       | 0.84  | 0.78  | 0.65  | 0.97  | 1.07  | 0.77  | 1     | 0.66  | 0.32  | 0.77  |   |
|           | 0.04       | -0.1       | 0     | 0.35  | -0.02 | -0.12 | -0.15 | 0.01  | -0.39 | 0.04  | 0.04  | -0.45 | - |
|           | 0.07       |            |       |       |       |       |       |       |       |       |       |       |   |
| GENE1943X | 13179_at   | 13179_at   | 1     | 1.24  | 1.78  | 0.87  | 0.84  | 0.85  | 2.16  |       |       |       |   |
|           | 1.42       | 2.36       | 0.9   | 0.63  | 0.55  | 1.62  | 1.53  | 1.64  | 1.47  | 1.02  | 1.64  | 0.58  |   |
|           | 0.22       | 0.26       | 0.22  | 0.82  | 0.11  | 0.36  | -0.02 | -0.66 | -0.15 | 0.44  | 0.67  | -0.53 | 0 |
| GENE1942X | 20023_at   | 20023_at   | 1     | 1.15  | 1.75  | 1.15  | 0.79  | 0.76  | 1.5   |       |       |       |   |
|           | 2.05       | 2.47       | -0.12 | 1.53  | 0.33  | 1.41  | 1.35  | 1.68  | 1.47  | 0.5   | 0.73  | 0.26  | - |
| 0.12      | 0.01       | 0.16       | 0.33  | 0.81  | 0.48  | 0.43  | 0.09  | -0.41 | -0.16 | -0.12 | -0.76 | -0.66 |   |
| GENE1948X | 14052_at   | 14052_at   | 1     | 1.24  | 1.84  | 2.09  | 1.17  | 2.67  | 2.2   |       |       |       |   |
|           | 3.49       | 2.8        | 1.85  | 1.23  | 0.73  | 1.88  | 1.92  | 2.19  | 1.51  | 0.69  | 1.24  | 0     | - |
| 1.28      | -0.78      | -0.12      | 1.45  | 0.48  | -0.62 | 0.8   | -0.86 | -0.25 | -1.12 | -1.12 | -1.28 | -0.41 |   |
| GENE1947X | 18314_i_at | 18314_i_at | 1     | 1.09  | 0.79  | 1.06  | 0.57  | 1.35  | 1.65  |       |       |       |   |
|           | 1.42       | 1.42       | 1.31  | 1     | 0.66  | 1.39  | 1.34  | 1.6   | 1.26  | 0.82  | 0.98  | 0.61  | - |
| 0.34      | -0.45      | -0.49      | 0.77  | 0.56  | 0.7   | 0.83  | -0.91 | -1.21 | -0.12 | -0.26 | -0.26 | 0.04  |   |
| GENE1946X | 18315_s_at | 18315_s_at | 1     | 0.61  | 0.66  | 0.7   | -0.12 | 1.13  | 1.43  |       |       |       |   |
|           | 1.2        | 1.21       | 1.23  | 0.56  | 0.34  | 1.26  | 1.29  | 1.35  | 0.84  | 0.6   | 0.93  | 0.21  | - |
| 0.59      | -0.32      | -0.73      | 0.59  | 0     | 0.23  | 0.44  | -0.68 | -1    | -0.18 | -0.3  | -0.43 | 0.07  |   |
| GENE1941X | 15154_at   | 15154_at   | 1     | 1.64  | 3.58  | 1.65  | 0.35  | 1.58  | 1.37  |       |       |       |   |
|           | 2.08       | 3.65       | 2.2   | 1.37  | 0.56  | 3.23  | 3.48  | 2.64  | 2.07  | 1     | -0.68 | 0.11  | - |
| 0.73      | -1.21      | -0.66      | 0     | -0.66 | 0.01  | -0.97 | -1.69 | -1.32 | -1.02 | -0.81 | -0.1  | -0.05 |   |
| GENE1949X | 17510_at   | 17510_at   | 1     | 0.23  | 0.25  | 0.28  | 0.56  | 0.34  | 0.49  |       |       |       |   |
|           | 1.13       | 1.22       | 0.21  | 0.41  | 0.52  | 0.43  | 0.32  | 1.21  | 0.13  | 0.32  | 0.64  | 0.34  | - |
| 0.12      | -0.21      | -0.78      | -0.43 | -0.35 | -0.28 | -0.25 | -0.02 | -0.32 | -0.41 | -0.18 | -0.12 | 0     |   |
| GENE1951X | 17595_s_at | 17595_s_at | 1     | 0     | 0.48  | 1.09  | 0.94  | 1.6   | 1.24  |       |       |       |   |
|           | 3.29       | 2.81       | 1.93  | 0.58  | 0.94  | 0.73  | 1.17  | 2.77  | 0.46  | 0.69  | 0.29  | 0.73  | - |
| 1.59      | -0.51      | -0.39      | 0.36  | -0.25 | -0.16 | -0.21 | -0.88 | -1.15 | -0.37 | -0.1  | -0.94 | -0.34 |   |
| GENE1950X | 18243_at   | 18243_at   | 1     | 0.34  | 0.18  | 0.8   | 0.23  | 0.5   | 0.74  |       |       |       |   |
|           | 1.05       | 1.05       | 0.46  | 0.35  | 0.48  | 0.21  | 0.21  | 0.89  | 0.43  | 0.41  | -0.28 | 0.56  |   |
|           | 0.02       | -0.18      | -0.3  | 0.52  | -0.25 | -0.51 | -0.28 | -0.25 | -0.53 | -0.23 | -0.18 | -0.07 | - |
|           | 0.04       |            |       |       |       |       |       |       |       |       |       |       |   |
| GENE1952X | 16144_s_at | 16144_s_at | 1     | 1.05  | 1.32  | -0.15 | 1.05  | 1.23  | 0.94  |       |       |       |   |
|           | 1.91       | 1.96       | 0.45  | 1.14  | 0.52  | 0.91  | 0.66  | 1.86  | 1.34  | 0.29  | 0.05  | 0.64  | - |
| 0.49      | -0.97      | -0.34      | 0.4   | -0.47 | -0.68 | -0.32 | -0.15 | 0.08  | 0.34  | -0.04 | -0.43 | -0.37 |   |
| GENE1939X | 16594_at   | 16594_at   | 1     | 0.34  | 0.68  | 0.36  | 0.27  | 0.5   | 1.14  |       |       |       |   |
|           | 1.42       | 1.93       | 0.68  | 1     | 0.84  | 1.07  | 1.09  | 1.76  | 0.93  | 0.36  | 0.56  | 0.56  |   |
|           | 0.09       | -0.66      | -0.39 | 0.09  | -0.32 | -0.23 | 0.09  | -0.64 | -0.18 | -0.23 | -0.02 | 0.08  |   |
|           | 0.01       |            |       |       |       |       |       |       |       |       |       |       |   |
| GENE1938X | 20179_at   | 20179_at   | 1     | 0.45  | 0.87  | 0.33  | -0.39 | 0.82  | 0.85  |       |       |       |   |
|           | 0.84       | 1.29       | 0.32  | 0.41  | 0     | 1.13  | 0.82  | 0.91  | 0.54  | -0.21 | 0.37  | -0.55 | - |
| 0.97      | -0.28      | -1.08      | 0.04  | -0.57 | -0.51 | 0     | 0.18  | 0.11  | -0.08 | 0.18  | -0.13 | 0.15  |   |
| GENE1444X | 19936_at   | 19936_at   | 1     | 0.49  | -1.55 | -1    | 0.16  | 2.58  | 3.74  |       |       |       |   |
|           | 0.67       | 2.58       | 3     | 1.74  | 2.67  | 0.79  | 0.75  | 3.56  | 2     | 1.33  | 1.49  | 2.2   |   |

|           |            |            |            |       |       |       |       |       |       |       |       |       |       |
|-----------|------------|------------|------------|-------|-------|-------|-------|-------|-------|-------|-------|-------|-------|
|           | 2.75       | -1.32      | -1.73      | 1.48  | -1.69 | -0.34 | 0.17  | 1.22  | -0.51 | -0.81 | -1    | 0.33  |       |
|           | 0.04       |            |            |       |       |       |       |       |       |       |       |       |       |
| GENE1443X | 15376_at   | 15376_at   | 15376_at   | 1     | -0.51 | 0     | 0.48  | -0.07 | 0.94  | 1.73  | -     |       |       |
|           | 0.05       | 0.79       | 0.75       | 0.93  | 0.5   | 0.43  | 0.41  | 0.54  | 1.05  | -0.47 | -0.32 | 0.38  | 0.38  |
|           | 0.04       | 0.05       | 0.48       | -0.16 | 0.49  | -0.28 | 0.34  | -0.59 | -0.59 | 0.15  | -0.16 | -0.25 |       |
| GENE1442X | 16744_at   | 16744_at   | 16744_at   | 1     | -0.15 | -0.59 | 0.35  | -1    | 0.83  | 1.6   | -     |       |       |
|           | 0.1        | 0.64       | 0.87       | 1.71  | 1.18  | 0.17  | 0.33  | 1.35  | 0.77  | 0.35  | 0.84  | 0.58  | -0.35 |
|           | 1.51       | -0.47      | 0.87       | -0.81 | -0.25 | 0.25  | -1.83 | -0.76 | 0.38  | -0.15 | -1.28 | -1.39 |       |
| GENE1887X | 18753_s_at | 18753_s_at | 18753_s_at | 1     | 0.48  | 0.48  | 0     | 0     | 0.44  | 1.66  |       |       |       |
|           | 0.71       | 1.89       | 2.6        | 0     | 0     | 0.26  | 0.26  | 3.23  | 0     | 0     | 0     | 0     | 0     |
|           | 0          | 0          | 0.53       | -0.86 | -0.86 | 0     | 0     | 0     | 0     | 0     | 0     | 0     |       |
| GENE1886X | 13560_at   | 13560_at   | 13560_at   | 1     | -0.23 | -0.12 | 0.26  | 0.01  | 0.23  | 0.6   |       |       |       |
|           | 0.54       | 1.21       | 0.57       | 0.42  | 0.11  | -0.32 | -0.3  | 0.73  | 0.02  | -0.08 | 0.12  | -0.16 |       |
|           | 0.08       | 0.15       | -0.18      | 0.31  | 0.09  | 0.26  | -0.02 | 0.12  | 0.12  | 0.01  | 0.02  | 0.15  |       |
|           | 0.09       |            |            |       |       |       |       |       |       |       |       |       |       |
| GENE1829X | 17588_s_at | 17588_s_at | 17588_s_at | 1     | 0     | 0     | 0     | -0.86 | 0     | 0.84  |       |       |       |
|           | 0.58       | 3.22       | 0          | 0     | -0.86 | 0     | 0.35  | 1     | 0.67  | 0.26  | 0.67  | -0.59 | -     |
|           | 0.86       | 0          | 0          | 0     | 0.48  | 0.26  | 0     | -0.26 | 0.26  | 0     | 0     | 0     |       |
| GENE1828X | 13449_at   | 13449_at   | 13449_at   | 1     | 0     | 0     | 0     | 0     | 0     | 1.26  | 0     |       |       |
|           | 3.7        | 0          | 0          | 0     | 0     | 0     | 1.76  | 0     | 0     | 0     | 0     | 0     | 0     |
|           | 0          | 0          | 0          | 0     | 0     | 0     | 0     | 0     | 0     | 0     | 0     | 0     |       |
| GENE1831X | 19763_at   | 19763_at   | 19763_at   | 1     | 0     | 0     | 0     | 0     | 0     | 3.48  | 0     |       |       |
|           | 3.1        | 0          | 0          | 0     | 0     | 0     | 0.48  | 0     | 0     | 0     | 0     | 0     |       |
|           | 0          | 0          | 0          | 0     | 0     | 0     | 0     | 0     | 0     | 0     | 0     | 0     |       |
| GENE1830X | 20104_at   | 20104_at   | 20104_at   | 1     | 0.48  | 0.26  | 0     | 0     | -0.26 | 3.82  | 0     |       |       |
|           | 3.48       | -0.26      | 0          | 0     | 0     | 0     | 1     | 0     | 0     | 0     | 0     | 0     |       |
|           | 0          | -0.26      | 0          | 0     | 0     | 0     | 0     | 0     | 0.26  | 0     | 0.26  |       |       |
| GENE1826X | 15697_at   | 15697_at   | 15697_at   | 1     | 0.26  | 0.84  | 0     | 0.45  | -0.2  | 2.7   | 0     |       |       |
|           | 3.07       | -0.68      | 0          | -0.68 | 0     | 0.26  | 0     | 2.26  | 0     | 0.48  | -0.2  | 1     |       |
|           | 0.84       | 0          | -0.68      | -0.26 | 0.58  | 0     | -0.26 | 0     | 0     | 0.26  | 0     |       |       |
| GENE1827X | 20138_at   | 20138_at   | 20138_at   | 1     | 0.34  | 0.16  | 0.22  | 0.21  | -0.18 | 1.17  |       |       |       |
|           | 0.07       | 1.09       | -0.43      | -0.21 | -0.23 | -0.47 | -0.25 | 0     | 0.47  | -0.15 | 0.08  | 0     |       |
|           | 0.6        | -0.2       | -0.15      | -0.18 | -0.57 | -0.12 | -0.32 | -0.53 | 0.46  | 0.21  | 0.22  | -0.12 | -     |
|           | 0.08       |            |            |       |       |       |       |       |       |       |       |       |       |
| GENE2180X | 15200_s_at | 15200_s_at | 15200_s_at | 1     | 0.74  | 0.25  | 0.17  | 0.25  | 0.38  | 1.05  |       |       |       |
|           | 0.34       | 0.74       | 0          | -0.12 | -0.25 | -0.26 | -0.08 | 0.26  | 0.26  | 0.18  | 0.2   | 0.23  | -     |
|           | 0.16       | 0          | 0.13       | 0.58  | 0.32  | 0.2   | 0.15  | -0.28 | -0.12 | 0.11  | 0.09  | -0.3  | -0.21 |
| GENE1832X | 16168_s_at | 16168_s_at | 16168_s_at | 1     | 0.66  | 0.35  | -0.2  | 0.11  | 0.26  | 1.68  |       |       |       |
|           | 0.13       | 1.53       | 0.35       | 0.13  | 0.11  | 0.25  | 0.25  | 0.57  | 0.86  | 0.46  | 0.52  | 0.29  | -     |
|           | 0.16       | -0.55      | -0.02      | 0.08  | 0.09  | 0.12  | -0.07 | -0.68 | -0.32 | -0.04 | 0.11  | -0.28 | -0.07 |
| GENE1423X | 19157_at   | 19157_at   | 19157_at   | 1     | 0.54  | 0.29  | 0.5   | -0.64 | 0.28  | 1.41  |       |       |       |
|           | 0.13       | 0.57       | 0.28       | -0.21 | 0     | 0.32  | 0.01  | 0.08  | 0.6   | -0.13 | 0.29  | 0     |       |
|           | 0.08       | -0.16      | 0.59       | 0.02  | 0.07  | 0.07  | 0.2   | -0.62 | -0.68 | 0.65  | 0.08  | 0.11  |       |
|           | 0.11       |            |            |       |       |       |       |       |       |       |       |       |       |
| GENE2317X | 18738_f_at | 18738_f_at | 18738_f_at | 1     | 1.36  | 0.8   | 1.72  | 2.43  | 1.03  | 0.55  |       |       |       |
|           | 1.88       | 1.97       | 0.22       | 1.32  | 1.83  | 0.53  | 0.76  | 1.38  | 0.9   | 0.35  | 0.43  | 1.51  | 1     |
|           | 0.16       | 0.76       | 0.07       | 0.87  | 1.11  | 1     | 0.41  | 0     | 0.26  | 0.13  | 0.69  | 0.16  |       |
| GENE2210X | 13127_s_at | 13127_s_at | 13127_s_at | 1     | 1.07  | 0.38  | 0.62  | 0.88  | 0.73  | 0.92  |       |       |       |
|           | 1.11       | 1.25       | 0.48       | 0.49  | 0.43  | 0.22  | 0.26  | 0.94  | 0.26  | 0.23  | 0.9   | 0.33  |       |
|           | 0.29       | -0.1       | 0.22       | 0.48  | 0.83  | 0.79  | 0.68  | 0.34  | -0.07 | 0.15  | 0.17  | -0.02 |       |
|           | 0.17       |            |            |       |       |       |       |       |       |       |       |       |       |
| GENE2349X | 20433_at   | 20433_at   | 20433_at   | 1     | 2.17  | 2.38  | 2.31  | 3.89  | 3.21  | 2.87  |       |       |       |
|           | 2.24       | 2.7        | 1.26       | 1.21  | 2.45  | 1.92  | 2.27  | 1.47  | 2.43  | 0.68  | 1     | 2.6   |       |
|           | 1.27       | 1.72       | 2.06       | 0.63  | 2.86  | 2.18  | 1.74  | 1.24  | -0.78 | -0.41 | -0.34 | -0.51 | -     |
|           | 0.37       |            |            |       |       |       |       |       |       |       |       |       |       |
| GENE2348X | 19845_g_at | 19845_g_at | 19845_g_at | 1     | 2.37  | 1.37  | 2.59  | 3.13  | 3.03  | 2.36  |       |       |       |
|           | 2.32       | 1.96       | 1.42       | 0.73  | 1.64  | 0.97  | 1.45  | 1.19  | 2.18  | 1.21  | 1.07  | 2.51  |       |





|           |            |            |       |       |       |       |       |       |       |       |       |       |      |
|-----------|------------|------------|-------|-------|-------|-------|-------|-------|-------|-------|-------|-------|------|
| GENE2136X | 13370_at   | 13370_at   | 1     | 6.7   | 5.12  | 4.9   | 6.31  | 5.51  | 4.94  |       |       |       |      |
|           | 4.88       | 5.45       | 2.26  | 1.7   | 1.84  | 1.63  | 2.28  | 2.76  | 1.58  | 1.26  | 1.67  | 1.48  | 0    |
|           | 1.2        | 1.64       | 0     | 2.76  | 1.37  | 1.26  | 0     | 0     | 0.8   | 0.9   | 0.09  | 0.68  |      |
| GENE2135X | 13014_at   | 13014_at   | 1     | 2.98  | 2.66  | 2.38  | 3.07  | 2.5   | 2.86  |       |       |       |      |
|           | 2.23       | 2.74       | 1.12  | 1.47  | 0.98  | 1.62  | 1.6   | 1.97  | 1.35  | 0.8   | 0.85  | 1.08  |      |
|           | 0.93       | 0.63       | 0.91  | 0.5   | 1.36  | 1     | 0.98  | 0.38  | 0.01  | 0.16  | 0.33  | 0.46  |      |
|           | 0.09       |            |       |       |       |       |       |       |       |       |       |       |      |
| GENE2134X | 15629_s_at | 15629_s_at | 1     | 3     | 2.47  | 1.98  | 2.98  | 2.19  | 1.88  |       |       |       |      |
|           | 2.44       | 2.18       | 0.86  | 0.43  | 0.65  | 1.23  | 1.3   | 1.63  | 1.29  | 0.56  | 0.98  | 1.34  |      |
|           | 0.58       | 0.22       | 1.1   | 0.64  | 1.2   | 0.97  | 0.72  | 0.15  | 0.49  | 0.28  | 0.26  | -0.15 |      |
|           | 0.23       |            |       |       |       |       |       |       |       |       |       |       |      |
| GENE2105X | 15110_s_at | 15110_s_at | 1     | 1.03  | 0.83  | 0.66  | 0.8   | 0.72  | 0.8   |       |       |       |      |
|           | 0.84       | 1.05       | 0.41  | 0.71  | 0.21  | 0.42  | 0.54  | 0.68  | 0.5   | 0.05  | 0.31  | 0.33  |      |
|           | 0.13       | 0.29       | 0.4   | 0.34  | 0.35  | 0.21  | -0.07 | 0.26  | 0.01  | -0.1  | -0.18 | -0.08 | 0    |
| GENE2087X | 19152_at   | 19152_at   | 1     | 4.71  | 5     | 5.49  | 4.9   | 3.14  | 2.74  |       |       |       |      |
|           | 3.74       | 4.19       | 0.18  | 3.92  | 2.37  | 3.07  | 3.2   | 3.45  | 3.26  | 1.5   | 0.87  | 0.84  | 0    |
|           | 2.9        | 2.92       | -0.49 | 0.58  | 0.41  | -0.26 | 0     | 0.67  | 0     | 0.84  | -0.68 | 1.17  |      |
| GENE2072X | 18224_s_at | 18224_s_at | 1     | 3.56  | 3.25  | 0.41  | 3.88  | 2.69  | 2.48  |       |       |       |      |
|           | 2.74       | 4.04       | 1.33  | 1.83  | 0.91  | 3.14  | 3.52  | 3.6   | 2.25  | -0.15 | 0.84  | 1.12  |      |
|           | 1.17       | 0.63       | 1.38  | -0.2  | 2.24  | 1.41  | -0.1  | -0.26 | 0.65  | -0.45 | 0.42  | -0.08 |      |
|           | 0.15       |            |       |       |       |       |       |       |       |       |       |       |      |
| GENE2071X | 19110_s_at | 19110_s_at | 1     | 2.87  | 2.38  | 1.11  | 2.41  | 1.65  | 1.82  |       |       |       |      |
|           | 1.85       | 3.24       | 0.29  | 0.95  | 1.28  | 1.28  | 1.63  | 2.64  | 1.15  | 1.22  | 0     | 1.35  |      |
|           | 1.15       | 1.52       | 2.62  | -0.53 | 2.58  | 2     | -0.26 | 0.26  | 0.73  | 1     | 0     | 0     |      |
|           | 0.45       |            |       |       |       |       |       |       |       |       |       |       |      |
| GENE2070X | 12500_s_at | 12500_s_at | 1     | 2.87  | 2.07  | 1.25  | 2.79  | 2.72  | 2.38  |       |       |       |      |
|           | 1.97       | 2.29       | 1.98  | 1.61  | 2.37  | 2.35  | 2.2   | 2.26  | 1.59  | 2.09  | 1.62  | 1.93  |      |
|           | 0.28       | 0.26       | 1.82  | -0.05 | 2.13  | 0.7   | 0.59  | 0.94  | -0.62 | 0.13  | 0.36  | -0.16 |      |
|           | 0.28       |            |       |       |       |       |       |       |       |       |       |       |      |
| GENE2069X | 19591_at   | 19591_at   | 1     | 2.18  | 1.65  | 1.15  | 2.32  | 2.03  | 1.47  |       |       |       |      |
|           | 1.13       | 1.45       | 1.97  | 1.45  | 2.17  | 2.09  | 2.14  | 1.52  | 1.28  | 2.26  | 2.22  | 1.71  | -    |
|           | 0.39       | -0.16      | 0.83  | -0.71 | 1.47  | 0.64  | 0.53  | 0.43  | 0.12  | 0.15  | 0.43  | -0.08 | 0.41 |
| GENE2068X | 17119_s_at | 17119_s_at | 1     | 1.76  | 1.17  | 0.29  | 0.98  | 1.07  | 0.92  |       |       |       |      |
|           | 0.73       | 1.32       | 1.21  | 1.14  | 1.07  | 1.45  | 1.38  | 1.28  | 0.93  | 1.45  | 1.31  | 0.83  | -    |
|           | 0.21       | 0.54       | 1.33  | -0.43 | 1.8   | 0.37  | 0.2   | 0.27  | 0.01  | 0.02  | 0.26  | -0.45 | 0.09 |
| GENE2067X | 19843_at   | 19843_at   | 1     | 2.01  | 1.15  | 0.94  | 2.28  | 1.28  | 0.32  |       |       |       |      |
|           | 0.74       | 0.89       | 1.14  | 0.73  | 1.91  | 0.76  | 1.33  | 1.32  | 1.07  | 1.28  | 0.6   | 1.47  | -    |
|           | 0.18       | 0.6        | 1.59  | -1.39 | 1.52  | 0.28  | -0.01 | -0.39 | -0.18 | 0.07  | 0.4   | -0.32 | 0.25 |
| GENE2066X | 18122_at   | 18122_at   | 1     | 2.59  | 2.74  | 2.31  | 3.64  | 2.89  | 2.03  |       |       |       |      |
|           | 2.52       | 2.46       | 1.49  | 2.84  | 3.22  | 2.89  | 2.63  | 2.49  | 2.71  | 1.66  | 0.97  | 2.48  |      |
|           | 0.8        | 1.33       | 1.75  | 0.18  | 2.09  | 1.48  | 1.02  | 0.91  | 0.11  | 0.31  | 0     | -0.08 |      |
|           | 0.11       |            |       |       |       |       |       |       |       |       |       |       |      |
| GENE2065X | 18681_at   | 18681_at   | 1     | 1.99  | 1.82  | 1.51  | 2.45  | 1.69  | 1.33  |       |       |       |      |
|           | 0.94       | 1.32       | 0.96  | 2.2   | 2.34  | 2.25  | 2.01  | 1.46  | 2.23  | 1.73  | 1.22  | 1.88  |      |
|           | 0.37       | 0.15       | 0.82  | -0.26 | 1.02  | 0.35  | 0.43  | 0.47  | 0.28  | 0.02  | 0.34  | -0.15 | -    |
|           | 0.08       |            |       |       |       |       |       |       |       |       |       |       |      |
| GENE2064X | 14643_s_at | 14643_s_at | 1     | 3.14  | 2.09  | 2.28  | 3.64  | 2.04  | 1.65  |       |       |       |      |
|           | 1.62       | 1.43       | 0.66  | 3.63  | 2.32  | 3.03  | 2.28  | 2.13  | 3.86  | 1.74  | 0.18  | 3.07  |      |
|           | 1.46       | 1.11       | 1.5   | 0.34  | 1.93  | 1.47  | 1.14  | -0.62 | 0.44  | 0.35  | 0.35  | -0.45 |      |
|           | 0.26       |            |       |       |       |       |       |       |       |       |       |       |      |
| GENE2063X | 17044_at   | 17044_at   | 1     | 1.23  | 0.84  | 0.47  | 0.83  | 0.58  | 0.92  |       |       |       |      |
|           | 0.51       | 0.9        | 0.79  | 1.62  | 1.09  | 1.53  | 1.13  | 1.31  | 1.5   | 1.01  | 1.18  | 0.84  |      |
|           | 0.28       | 0.74       | 0.64  | -0.13 | 0.73  | 0.68  | 0.52  | 0     | -0.07 | 0.13  | 0.11  | 0.09  |      |
|           | 0.08       |            |       |       |       |       |       |       |       |       |       |       |      |
| GENE2062X | 15532_r_at | 15532_r_at | 1     | 1.23  | 1.63  | 2.28  | 2.85  | 2.4   | 0.12  |       |       |       |      |
|           | 3.83       | 3.14       | 0.68  | 1.75  | 1.58  | 2.1   | 2.17  | 3.1   | 1.91  | 1.03  | 0.96  | 1.49  | -1   |
|           | -0.21      | -0.2       | -1.08 | 1.75  | -0.68 | 0.8   | 0     | 0     | -0.2  | -0.68 | -0.21 | -0.59 |      |





|           |            |            |       |       |       |       |       |       |       |       |       |       |       |
|-----------|------------|------------|-------|-------|-------|-------|-------|-------|-------|-------|-------|-------|-------|
| GENE2096X | 12538_at   | 12538_at   | 1     | 0.53  | 1.24  | 1.26  | 1.22  | 1.23  | -0.55 |       |       |       |       |
|           | 1.7        | 1.74       | 0.85  | 1.15  | 0.69  | 1.09  | 1     | 1.81  | 1     | 0.25  | -0.16 | 0.18  |       |
|           | 0.02       | -0.62      | -0.05 | -0.32 | 0.71  | 0.15  | 0.29  | -0.26 | 0.16  | -0.08 | -0.35 | -0.49 | -     |
|           | 0.12       |            |       |       |       |       |       |       |       |       |       |       |       |
| GENE2095X | 15611_s_at | 15611_s_at | 1     | 0.33  | 1.33  | 0.97  | 0.79  | 0.87  | 0.11  |       |       |       |       |
|           | 1.45       | 0.65       | 0.72  | 1.31  | 0.65  | 0.97  | 0.63  | 1.5   | 0.43  | 0.4   | 0.51  | 0.42  | -     |
|           | 0.71       | -0.15      | -0.3  | -0.07 | -0.01 | 0.2   | 0.16  | 0.07  | 0.12  | -0.15 | -0.04 | -0.08 | 0.09  |
| GENE2094X | 15103_s_at | 15103_s_at | 1     | 0.68  | 0.98  | 1.01  | 0.62  | 1.05  | 0.01  |       |       |       |       |
|           | 1.73       | 0.51       | 0.79  | 1.06  | 0.23  | 0.48  | 0.31  | 1.4   | 0.16  | -0.02 | 0.04  | 0.23  | -     |
|           | 0.2        | 0.26       | 0.25  | 0.62  | 0.36  | 0.4   | 0.36  | 0.23  | 0.21  | -0.15 | -0.04 | -0.23 | 0.04  |
| GENE2093X | 18594_at   | 18594_at   | 1     | 0.73  | 0.53  | 0.76  | 0.5   | 0.88  | 0.45  |       |       |       |       |
|           | 1.01       | 0.62       | 0.84  | 0.83  | 0.28  | 0.57  | 0.44  | 1.04  | 0.35  | 0.11  | -0.01 | 0.18  | -     |
|           | 0.13       | 0.15       | 0.11  | 0.51  | 0.37  | 0.5   | 0.45  | -0.2  | -0.59 | -0.04 | -0.12 | -0.16 | 0.01  |
| GENE2215X | 17511_s_at | 17511_s_at | 1     | 5.82  | 5.5   | 1.8   | 6.36  | 5.15  | 2.7   |       |       |       |       |
|           | 6.11       | 5.99       | 2.17  | 0.7   | 3.45  | 4.22  | 4.17  | 4.76  | 0.78  | 1.58  | 1.28  | 2.73  |       |
|           | 1.58       | 1.45       | 2.46  | 1.32  | 3.82  | 1.48  | 0.48  | 1.23  | -0.91 | -0.12 | -0.39 | -0.26 | -     |
|           | 0.13       |            |       |       |       |       |       |       |       |       |       |       |       |
| GENE2214X | 15389_at   | 15389_at   | 1     | 2.2   | 2.31  | 1.77  | 2.49  | 2.58  | 2.72  |       |       |       |       |
|           | 3.37       | 3.77       | 1.48  | 0.32  | 1.2   | 1.43  | 1.41  | 2.91  | 0.25  | 0.21  | 0.04  | 1.14  |       |
|           | 1.09       | 0.48       | 1.33  | 1.59  | 1.44  | 0.98  | 0.49  | 0.9   | -0.43 | 0.04  | -0.57 | -0.51 | -     |
|           | 0.34       |            |       |       |       |       |       |       |       |       |       |       |       |
| GENE2213X | 19944_at   | 19944_at   | 1     | 2.12  | 2.4   | 1.2   | 2.15  | 1.51  | 2.17  |       |       |       |       |
|           | 2.58       | 3.03       | 1.25  | 0.51  | 1.16  | 1.35  | 1.26  | 2.29  | -0.21 | 0.18  | 0.27  | 0.85  |       |
|           | 1.94       | 1.13       | 0.02  | 1.02  | 0.21  | 0.26  | 0.37  | -0.25 | -0.57 | -0.68 | -0.13 | 0.36  |       |
|           | 0.59       |            |       |       |       |       |       |       |       |       |       |       |       |
| GENE1982X | 13965_s_at | 13965_s_at | 1     | 2.09  | 2.84  | 1.37  | 2.02  | 2.55  | 1.35  | 3     |       |       |       |
|           | 2.37       | 0.91       | 1.56  | 1.61  | 1.67  | 1.37  | 2.76  | 0.32  | 0.54  | 0.54  | 0.75  | -0.71 | -     |
|           | 1.15       | -1.12      | 0.63  | -0.18 | 0     | 0.65  | -0.49 | -0.71 | 0.09  | 0.81  | -0.41 | 0.05  |       |
| GENE1944X | 17384_at   | 17384_at   | 1     | 1.2   | 1.05  | 0.49  | 0.49  | 0.97  | 1.22  |       |       |       |       |
|           | 1.1        | 1.56       | 0.84  | 0.63  | 0.48  | 0.53  | 0.72  | 1.07  | 0.12  | 0.41  | 0.85  | 0.32  | -     |
|           | 0.02       | -0.01      | -0.47 | 0.2   | 0.04  | 0.16  | 0.21  | -0.13 | -0.37 | -0.15 | -0.01 | 0     | 0.18  |
| GENE2160X | 20291_at   | 20291_at   | 1     | 2.83  | 1.7   | 1.85  | 2.9   | 2.27  | 1.42  |       |       |       |       |
|           | 2.8        | 2.56       | 0.9   | 0.53  | 1.67  | 1.17  | 1.21  | 1.78  | 1.52  | 1.37  | 0.79  | 2.21  |       |
|           | 0.7        | 0.48       | 1.05  | 0.65  | 1.13  | 0.58  | 0.25  | -0.02 | -0.86 | -0.16 | -0.34 | -0.39 | -     |
|           | 0.23       |            |       |       |       |       |       |       |       |       |       |       |       |
| GENE2131X | 20656_at   | 20656_at   | 1     | 1.96  | 1.61  | 1.55  | 2.14  | 1.74  | 1.56  |       |       |       |       |
|           | 1.68       | 1.54       | 0.62  | 0.07  | 0.85  | 0.87  | 0.87  | 1.23  | 0.82  | 0.84  | 0.38  | 0.92  |       |
|           | 0.87       | 0.23       | 0.55  | 0.55  | 0.44  | 0.2   | -0.02 | -0.1  | -0.3  | 0.07  | -0.16 | -0.08 |       |
|           | 0.04       |            |       |       |       |       |       |       |       |       |       |       |       |
| GENE2099X | 18936_at   | 18936_at   | 1     | 4.37  | 3.3   | 1.89  | 3.53  | 3.44  | 3.37  |       |       |       |       |
|           | 2.26       | 2.45       | 1.69  | 1.37  | 1.37  | 2.18  | 2.27  | 1.89  | 1.93  | 1.66  | 1.42  | 1.47  |       |
|           | 0.15       | -0.15      | 0     | 0.45  | 1.46  | 0.81  | 0.86  | -0.91 | -1.39 | 0.04  | -0.02 | -0.76 |       |
|           | 0.15       |            |       |       |       |       |       |       |       |       |       |       |       |
| GENE2098X | 15211_s_at | 15211_s_at | 1     | 1.26  | 0.79  | 0.99  | 1.71  | 1.46  | 0.54  |       |       |       |       |
|           | 1.27       | 1.1        | 0.34  | 0.28  | 0.4   | 0.8   | 0.85  | 0.49  | 1.05  | 0.26  | 0.22  | 0.79  | -     |
|           | 0.13       | -0.32      | 0.15  | 0.17  | 0.76  | 0.29  | 0.09  | -0.3  | -0.59 | -0.18 | -0.12 | -0.39 | -0.39 |
| GENE2122X | 20194_at   | 20194_at   | 1     | 4.05  | 3.84  | 3.49  | 5.11  | 4.31  | 3.39  |       |       |       |       |
|           | 4.18       | 4.18       | 1.96  | 2.88  | 3     | 3.13  | 3.18  | 3.39  | 3.15  | 1.01  | 0.5   | 2.29  |       |
|           | 0.36       | -0.73      | 0.94  | 0.53  | 0.82  | 0.41  | 0.58  | -0.28 | -0.86 | -0.1  | 0.17  | -0.86 |       |
|           | 0.08       |            |       |       |       |       |       |       |       |       |       |       |       |
| GENE2121X | 12227_at   | 12227_at   | 1     | 2.01  | 1.88  | 1.85  | 2.07  | 1.8   | 1.96  |       |       |       |       |
|           | 2.23       | 2.41       | 0.97  | 1.59  | 1.18  | 1.82  | 1.6   | 2.37  | 2.07  | 0.89  | 0.44  | 1.22  |       |
|           | 0.27       | -0.1       | 0.34  | 0.87  | 0.37  | 0.37  | 0.23  | -0.47 | -0.97 | 0.02  | 0.13  | -0.71 | -     |
|           | 0.01       |            |       |       |       |       |       |       |       |       |       |       |       |
| GENE2120X | 16526_at   | 16526_at   | 1     | 1.72  | 1.79  | 2     | 1.89  | 1.92  | 1.21  |       |       |       |       |
|           | 2.31       | 2.16       | 0.77  | 0.98  | 0.71  | 1.39  | 1.4   | 1.72  | 1.54  | 0.64  | 0.4   | 0.96  | 0     |
|           | -0.55      | 0.4        | 0.15  | 0.55  | 0.02  | -0.07 | -0.32 | -0.35 | -0.13 | -0.12 | 0.02  | 0.21  |       |

|           |            |            |       |       |       |       |       |       |       |       |       |       |       |
|-----------|------------|------------|-------|-------|-------|-------|-------|-------|-------|-------|-------|-------|-------|
| GENE2124X | 19762_at   | 19762_at   | 1     | 3.58  | 4.29  | 5.2   | 6.1   | 5.72  | 4.08  |       |       |       |       |
|           | 6.22       | 5          | 3.63  | 3.3   | 4.13  | 3.37  | 4.29  | 4.13  | 5.15  | 1.92  | 1.67  | 4.52  |       |
|           | 1.37       | 0          | 2.07  | 1.26  | -0.32 | -0.07 | 0.81  | 0     | 0     | 0     | 0     | 0     | 0     |
| GENE2112X | 14673_s_at | 14673_s_at | 1     | 2.53  | 1.84  | 2.76  | 2.47  | 2.57  | 2.55  |       |       |       |       |
|           | 2.94       | 3.07       | 1.91  | 1.65  | 1.86  | 1.74  | 1.59  | 2.53  | 1.82  | 1.64  | 1.2   | 1.91  |       |
|           | 0.38       | 0.13       | 0.49  | 0.6   | 0.35  | 0.25  | -0.94 | 0.29  | 0     | 0.26  | 0.11  | -0.16 |       |
|           | 0.27       |            |       |       |       |       |       |       |       |       |       |       |       |
| GENE2119X | 19646_at   | 19646_at   | 1     | 1.86  | 3.48  | 2.57  | 2.9   | 3.8   | 3.42  |       |       |       |       |
|           | 4.01       | 3.55       | 3     | 2.32  | 2.22  | 2.88  | 2.52  | 3.73  | 2.31  | 0.74  | 0.27  | 2.03  |       |
|           | 0.11       | 0.02       | 0.15  | 1.56  | -0.32 | -0.43 | -0.25 | -0.34 | -0.28 | -0.12 | 0.15  | -0.51 |       |
|           | 0.13       |            |       |       |       |       |       |       |       |       |       |       |       |
| GENE2118X | 12797_s_at | 12797_s_at | 1     | 0.75  | 1.21  | 1.33  | 1.2   | 1.75  | 0.84  |       |       |       |       |
|           | 1.58       | 1.55       | 0.94  | 0.77  | 0.64  | 0.84  | 0.83  | 1.28  | 0.84  | 0.27  | 0.13  | 0.52  |       |
|           | 0.17       | -0.15      | 0.08  | 0.56  | 0.2   | 0.07  | -0.01 | 0.48  | 0.12  | 0.02  | -0.12 | -0.02 | -     |
|           | 0.18       |            |       |       |       |       |       |       |       |       |       |       |       |
| GENE2117X | 19673_g_at | 19673_g_at | 1     | 4.65  | 4.97  | 3.65  | 6.25  | 6.5   | 5.32  |       |       |       |       |
|           | 7.52       | 7.15       | 5.29  | 3.53  | 5.65  | 5.24  | 5     | 7.31  | 3.46  | 3.88  | 3.25  | 5.01  |       |
|           | 1.48       | -0.23      | 1.17  | 2.32  | 3.2   | 2.22  | 1.97  | 1.05  | -1.18 | 0.23  | 0.56  | -0.73 |       |
|           | 0.01       |            |       |       |       |       |       |       |       |       |       |       |       |
| GENE2116X | 19672_at   | 19672_at   | 1     | 2.66  | 3.57  | 2.81  | 3.59  | 3.97  | 3.1   |       |       |       |       |
|           | 4.36       | 4.24       | 2.74  | 2.28  | 3.41  | 3.59  | 3.54  | 4.13  | 2.37  | 2.03  | 1.73  | 3.08  |       |
|           | 0.54       | -0.23      | 0.57  | 0.84  | 2.18  | 1.55  | 1.19  | 0.95  | -1.18 | -0.08 | 0     | -0.55 | -     |
|           | 0.43       |            |       |       |       |       |       |       |       |       |       |       |       |
| GENE2115X | 19284_at   | 19284_at   | 1     | 1.43  | 3.43  | 3.41  | 3.98  | 4.26  | 2.69  |       |       |       |       |
|           | 4.17       | 4.46       | 3.17  | 2.9   | 3.29  | 3.91  | 3.98  | 4.2   | 2.7   | 1.43  | 1.77  | 2.46  |       |
|           | 1.07       | -0.32      | -0.43 | 0.73  | 0.7   | 0.91  | 0.89  | 0.85  | 0     | -0.35 | -0.45 | 0.29  | -     |
|           | 0.21       |            |       |       |       |       |       |       |       |       |       |       |       |
| GENE2114X | 17860_at   | 17860_at   | 1     | 2.99  | 3.37  | 2.39  | 4.11  | 2.85  | 1.78  |       |       |       |       |
|           | 3.25       | 3.73       | 1.9   | 2.74  | 3.76  | 3.71  | 3.43  | 3.94  | 2.46  | 2.15  | 1.43  | 2.79  |       |
|           | 0.35       | 0          | 1.29  | -0.05 | 1.79  | 0.51  | 0     | 0.63  | -0.32 | -0.1  | 0.36  | -0.66 | -     |
|           | 0.2        |            |       |       |       |       |       |       |       |       |       |       |       |
| GENE2113X | 15586_s_at | 15586_s_at | 1     | 1.32  | 1.77  | 1.75  | 1.47  | 1.79  | 1.25  |       |       |       |       |
|           | 2.12       | 2.08       | 1.12  | 1.43  | 1.44  | 1.89  | 1.72  | 2.09  | 1.39  | 0.81  | 0.48  | 1.29  |       |
|           | 0.25       | -0.15      | 0.53  | 0.27  | 0.72  | 0.48  | 0.02  | -0.13 | -0.28 | 0.01  | 0.25  | -0.1  |       |
|           | 0.02       |            |       |       |       |       |       |       |       |       |       |       |       |
| GENE2111X | 17104_s_at | 17104_s_at | 1     | 1.54  | 1.48  | 1.47  | 1.8   | 1.45  | 1.06  |       |       |       |       |
|           | 2.32       | 2.37       | 0.93  | 0.99  | 1.12  | 1.42  | 1.5   | 1.92  | 1.15  | 1     | 0.95  | 1.27  |       |
|           | 0.48       | -0.43      | 0.73  | -0.16 | 0.48  | 0.11  | -0.02 | 0.69  | 0.57  | 0.21  | 0.07  | 0.25  |       |
|           | 0.02       |            |       |       |       |       |       |       |       |       |       |       |       |
| GENE2005X | 15921_s_at | 15921_s_at | 1     | 1.79  | 1.45  | 1.6   | 1.54  | 1.59  | 1.96  |       |       |       |       |
|           | 1.72       | 2.46       | 1.13  | 1.36  | 1.6   | 1.15  | 1.41  | 2.09  | 1.77  | 1.37  | 1.26  | 0.96  |       |
|           | 0.55       | -0.18      | -0.02 | 1.02  | 0.26  | 0.27  | 0.38  | 0.01  | -1.28 | -0.18 | -0.12 | 0.41  |       |
|           | 0.74       |            |       |       |       |       |       |       |       |       |       |       |       |
| GENE2004X | 15487_at   | 15487_at   | 1     | 0.97  | 1.28  | 0.89  | 1.63  | 1.2   | 2     |       |       |       |       |
|           | 1.36       | 2.46       | 0.7   | 1.34  | 0.97  | 0.74  | 0.79  | 1.61  | 1.91  | 0.87  | 0.32  | 1.44  |       |
|           | 0.81       | -0.47      | 0.38  | 0.85  | 0.58  | 0.17  | 0.29  | -0.15 | -0.41 | 0.08  | 0.04  | 0.16  |       |
|           | 0.41       |            |       |       |       |       |       |       |       |       |       |       |       |
| GENE1980X | 16173_s_at | 16173_s_at | 1     | 3.17  | 3.7   | 4.7   | 3.67  | 2.47  | -0.18 |       |       |       |       |
|           | 4.37       | 3.78       | 1     | 3.58  | 2.26  | 3.23  | 2.54  | 4.02  | 3.26  | 1.83  | 1.43  | 1.92  |       |
|           | 0.67       | -0.08      | 0.09  | 0.15  | -0.41 | 0.32  | 0.16  | -0.23 | -0.81 | 0     | -0.12 | -0.18 |       |
|           | 0.52       |            |       |       |       |       |       |       |       |       |       |       |       |
| GENE1979X | 12736_f_at | 12736_f_at | 1     | 1.44  | 2.65  | 2.07  | 1.93  | 1.66  | 1.08  |       |       |       |       |
|           | 2.14       | 2.03       | 0.23  | 1.51  | 0.78  | 1.71  | 1.61  | 1.42  | 2.12  | 0.7   | 0.12  | 0.85  | -     |
|           | 0.15       | -1         | -0.15 | -0.41 | -0.51 | 0.26  | -0.32 | -0.28 | -0.76 | -0.88 | -0.76 | 0.13  | -0.15 |
| GENE1978X | 19638_at   | 19638_at   | 1     | 1.35  | 1.71  | 1.49  | 1.93  | 1.84  | 1.02  | 2     |       |       |       |
|           | 1.76       | 0.16       | 1.58  | 1.01  | 0.96  | 0.65  | 1.37  | 1.11  | 0.09  | -0.35 | 0.23  | -0.59 |       |
|           | 0.04       | 0.11       | -0.71 | 0.9   | 0.65  | 0.26  | -0.41 | -0.88 | -0.26 | -0.12 | -0.62 | -0.23 |       |

|           |            |            |       |       |       |       |       |       |       |       |       |       |       |   |
|-----------|------------|------------|-------|-------|-------|-------|-------|-------|-------|-------|-------|-------|-------|---|
| GENE1977X | 16038_s_at | 16038_s_at | 1     | 1.91  | 1.4   | 1.73  | 1.53  | 1.26  | 0.85  |       |       |       |       |   |
|           | 1.61       | 1.4        | 0.04  | 1.33  | 0.67  | 0.48  | 0.46  | 1.62  | 1.04  | 0.31  | 0.18  | 0.48  | -     |   |
|           | 0.47       | -0.59      | 0.46  | -0.35 | 0.43  | -0.12 | -0.71 | -0.32 | -0.3  | -0.02 | -0.3  | -0.18 | -0.05 |   |
| GENE2557X | 17096_s_at | 17096_s_at | 1     | 1.26  | 1.57  | 1.05  | 1.72  | 1.67  | 1.33  |       |       |       |       |   |
|           | 0.67       | 1.43       | 0.4   | 1.2   | 0.67  | 1.26  | 0.36  | 0.87  | 1.16  | 0.07  | -0.2  | 0.27  | -     |   |
|           | 0.02       | 0.26       | 0.84  | -0.23 | -0.39 | -0.81 | -0.76 | -1    | 0.07  | 0.43  | 0.37  | -0.57 | 0.02  |   |
| GENE2556X | 12846_s_at | 12846_s_at | 1     | 1.58  | 2.58  | 0.91  | 2.19  | 1.2   | 1.36  |       |       |       |       |   |
|           | 0.91       | 1.89       | 0.28  | 1.19  | 0.13  | 1.74  | 0.74  | 0.71  | 1.25  | 0.58  | 0.09  | 0.29  | -     |   |
|           | 1.21       | 1.28       | 1.34  | 0.27  | 0.68  | 0.13  | 0.01  | -2.32 | 0.42  | -0.15 | 1.32  | -0.86 | 0.55  |   |
| GENE1835X | 12930_at   | 12930_at   | 1     | 0.94  | 1.09  | 0.43  | 1.5   | 0.43  | 0.21  |       |       |       |       |   |
|           | 1.48       | 0.71       | 0.26  | 1.18  | 1     | 1.39  | 0.53  | 0.79  | 0.8   | 0.93  | 0.67  | 0.37  | -     |   |
|           | 0.32       | -0.12      | 0.27  | -0.49 | -0.47 | -1.12 | -0.32 | -1.51 | 0.52  | -0.13 | 1     | -0.86 | 0.08  |   |
| GENE2077X | 13212_s_at | 13212_s_at | 1     | 4.63  | 3.85  | 0     | 0     | 1.13  | 0.65  |       |       |       |       |   |
|           | 0.6        | 1.02       | 3.16  | 2.88  | 0     | 2.98  | 2.14  | 2.57  | 0.84  | 0     | 0     | 0     | 0     | 0 |
|           | 0          | 0          | 0.29  | 1.98  | -0.57 | 1.94  | -0.35 | 0     | 0     | 0     | 0     | 0     | 0     |   |
| GENE2081X | 15147_s_at | 15147_s_at | 1     | 0.53  | 0.92  | 0.47  | 0.97  | 1.44  | 0.49  |       |       |       |       |   |
|           | 1.04       | 0.7        | 1.36  | 1.42  | 1.11  | 1.53  | 1.39  | 1.83  | 1.17  | 0.53  | -0.21 | 0.51  | -     |   |
|           | 0.39       | -0.66      | -0.16 | 0.25  | 0.2   | 0.18  | 0.34  | -0.08 | 0.01  | -0.13 | -0.12 | -0.1  | 0.11  |   |
| GENE2080X | 19960_at   | 19960_at   | 1     | 0.34  | 1.27  | 0.79  | 1.07  | 1.3   | 0.12  |       |       |       |       |   |
|           | 0.98       | 0.77       | 1.17  | 1.7   | 1.07  | 1.78  | 1.52  | 1.59  | 1.51  | 0.43  | 0.28  | 0.43  | -     |   |
|           | 0.45       | -0.34      | -0.2  | -0.04 | -0.51 | -0.35 | -0.18 | -0.05 | -0.13 | 0     | 0.11  | 0.12  | -0.25 |   |
| GENE2079X | 15971_s_at | 15971_s_at | 1     | 1.59  | 1.89  | 1.43  | 2.47  | 1.14  | -0.39 |       |       |       |       |   |
|           | 1.65       | 2.25       | 1.4   | 2.25  | 1.85  | 2.51  | 2.29  | 3.18  | 1.96  | 1.11  | 0     | 1.23  |       |   |
|           | 0.02       | -0.35      | 0.94  | -0.45 | 0.61  | 0.07  | 0.05  | 0.32  | 0.36  | 0.08  | -0.04 | 0     |       |   |
|           | 0.02       |            |       |       |       |       |       |       |       |       |       |       |       |   |
| GENE2078X | 18636_at   | 18636_at   | 1     | 0.8   | 1.31  | 0.22  | 1.45  | 1.09  | -0.21 |       |       |       |       |   |
|           | 0.52       | 0.56       | 1.33  | 2.24  | 2.02  | 2.55  | 2.26  | 2     | 2.17  | 1     | 0.58  | 1.42  | -     |   |
|           | 0.12       | -0.05      | 0.52  | 0     | -0.21 | -0.15 | 0     | 0.41  | 0     | 0.15  | -0.15 | 0.16  |       |   |
| GENE2055X | 15792_at   | 15792_at   | 1     | 2.59  | 2.12  | 0.73  | 2.64  | 2.35  | 2.01  |       |       |       |       |   |
|           | 0.89       | 1.79       | 2.19  | 2.51  | 3.07  | 3.23  | 3.41  | 3     | 2.67  | 2.32  | 1.74  | 2.73  |       |   |
|           | 0.73       | -1.51      | -0.47 | 0.53  | -0.55 | 0.15  | 0.21  | -0.1  | -0.05 | -0.16 | 0.22  | -0.35 |       |   |
|           | 0.05       |            |       |       |       |       |       |       |       |       |       |       |       |   |
| GENE2054X | 13555_at   | 13555_at   | 1     | 1.4   | 1.41  | 1.1   | 1.23  | 1.77  | 1.42  |       |       |       |       |   |
|           | 1.79       | 1.69       | 2.01  | 2.91  | 2.39  | 2.34  | 2.15  | 2.25  | 2.11  | 1.77  | 1.67  | 1.89  | -     |   |
|           | 0.23       | -0.59      | -1.02 | 0.4   | -0.57 | -0.59 | -0.23 | 0.22  | -0.28 | -0.32 | 0.04  | 0.07  | 0.4   |   |
| GENE2053X | 12454_at   | 12454_at   | 1     | 1.52  | 2.25  | 2.15  | 2.17  | 1.89  | 1.17  |       |       |       |       |   |
|           | 1.7        | 1.34       | 1.09  | 2.28  | 1.7   | 2.89  | 2.82  | 2.04  | 2.45  | 1.51  | 0.97  | 1.57  |       |   |
|           | 0.28       | 0.38       | 0.08  | 0.33  | 0.51  | 0.56  | 0.33  | 0.81  | -0.23 | -0.26 | -0.15 | 0.4   |       |   |
|           | 0.36       |            |       |       |       |       |       |       |       |       |       |       |       |   |
| GENE2052X | 20384_at   | 20384_at   | 1     | 1.7   | 2.43  | 1.97  | 2.12  | 1.56  | 1.17  |       |       |       |       |   |
|           | 1.63       | 1.68       | 2.28  | 3.43  | 3.32  | 3.52  | 3.31  | 3.14  | 2.76  | 2.81  | 2.5   | 2.01  |       |   |
|           | 0.22       | 0.8        | 0.32  | -0.18 | 0.62  | 0.32  | 0.07  | 0.67  | -0.16 | -0.57 | -0.51 | -0.02 |       |   |
|           | 0.4        |            |       |       |       |       |       |       |       |       |       |       |       |   |
| GENE1940X | 13134_s_at | 13134_s_at | 1     | 1.16  | 2.53  | 0.05  | 1.37  | 0.79  | 0.53  |       |       |       |       |   |
|           | 1.67       | 2.3        | 1.57  | 1.94  | 1.95  | 2.16  | 1.33  | 3.41  | 1.25  | 1.71  | 1.08  | 0.82  | -     |   |
|           | 0.04       | -0.43      | -0.68 | -0.08 | 0.05  | -0.21 | -0.16 | -0.55 | -1.21 | -0.53 | -0.55 | -0.28 | 0.78  |   |
| GENE1847X | 14613_at   | 14613_at   | 1     | 1     | 2.54  | -0.78 | 2.02  | 0.26  | -1    |       |       |       |       |   |
|           | 1.67       | 1          | 1.48  | 2.48  | 3.04  | 4.24  | 3.64  | 3.84  | 2.01  | 2.25  | 1.33  | 1.26  | -     |   |
|           | 0.59       | 0.78       | 0.21  | -0.73 | -0.59 | -0.59 | 0.28  | -0.86 | -0.18 | -0.47 | 0     | 0     | 0.92  |   |
| GENE1846X | 12240_at   | 12240_at   | 1     | 1.13  | 2.07  | -0.62 | 1.84  | -0.16 | -0.35 |       |       |       |       |   |
|           | 2.58       | 2.05       | 0.83  | 2.18  | 3.45  | 3.86  | 3.92  | 3.9   | 1.84  | 2.88  | 1.58  | 2.96  | 0     |   |
|           | -1.39      | -0.47      | -0.91 | 0.84  | 0     | 0.48  | -1    | 0.12  | 0     | -0.15 | -0.39 | 0.29  |       |   |
| GENE2316X | 16493_at   | 16493_at   | 1     | 3.8   | 1.17  | 0.73  | 2.43  | 3.1   | 0     |       |       |       |       |   |
|           | 1.87       | 1.54       | 3.45  | 1.29  | 2.21  | 2.85  | 4.13  | 3.72  | 2.29  | 2.48  | 2.53  | 2.79  |       |   |
|           | 1.14       | 0.88       | 2.2   | 3     | 1.8   | 1.63  | 1.58  | 2.17  | 1.26  | 2.26  | 0     | 0.77  | -     |   |

0.49

|           |            |            |       |      |       |      |      |       |       |       |       |       |   |
|-----------|------------|------------|-------|------|-------|------|------|-------|-------|-------|-------|-------|---|
| GENE2315X | 20214_i_at | 20214_i_at | 1     | 0.74 | 0.07  | 1.18 | 0.35 | 1.13  | 0.67  |       |       |       |   |
|           | 1.78       | 1.54       | 0.73  | 0.48 | 1.07  | 0.18 | 0.74 | 1.65  | 0.83  | 0.84  | 1.09  | 1     |   |
|           | 0.81       | -0.04      | 0.87  | 1.23 | 0.65  | 0.84 | 0.51 | 1.32  | 0.42  | 0.73  | -0.07 | 0.23  | - |
|           | 0.71       |            |       |      |       |      |      |       |       |       |       |       |   |
| GENE2314X | 16150_at   | 16150_at   | 1     | 0.46 | 0.7   | 1.07 | 0.98 | 1.15  | 1.33  |       |       |       |   |
|           | 1.96       | 1.14       | 1.37  | 0.63 | 1.51  | 0.45 | 1.15 | 1.37  | 0.01  | 0.22  | 1.26  | 1.96  |   |
|           | 1.8        | 1.49       | 0.88  | 1.69 | 1.89  | 2.01 | 1.96 | 2.25  | 0.72  | 1.15  | 0.68  | 1.23  |   |
|           | 0.58       |            |       |      |       |      |      |       |       |       |       |       |   |
| GENE2313X | 17963_at   | 17963_at   | 1     | 0.35 | 2.17  | 1.68 | 0.5  | 0.98  | 1.09  |       |       |       |   |
|           | 2.89       | 2.43       | 1.35  | 1.47 | 1.95  | 1.23 | 2.53 | 2.41  | 0.38  | 0.23  | 1.37  | 2.05  |   |
|           | 2.32       | 1.32       | 0.17  | 1.92 | 1.02  | 1.2  | 1.28 | 2     | 0.08  | 0.52  | 0.41  | 1.21  |   |
|           | 0.81       |            |       |      |       |      |      |       |       |       |       |       |   |
| GENE2029X | 12566_at   | 12566_at   | 1     | 1.57 | 2.13  | 0.63 | 1.42 | 3.13  | 1.32  |       |       |       |   |
|           | 2.04       | 0.48       | 1.93  | 2.65 | 1.59  | 2.66 | 2.37 | 2.3   | 0.71  | 0.94  | 0.38  | 0.79  |   |
|           | 1.05       | -0.39      | -0.57 | 2.36 | 2.07  | 2.37 | 2.09 | 1.82  | -1.21 | -0.35 | -1.12 | -0.37 | - |
|           | 0.53       |            |       |      |       |      |      |       |       |       |       |       |   |
| GENE2028X | 17862_at   | 17862_at   | 1     | 0.13 | 0.2   | 0.8  | 0.85 | 1.28  | 0.97  |       |       |       |   |
|           | 0.69       | 0.16       | 0.82  | 1.37 | 0.94  | 1.06 | 0.91 | 0.84  | 0.84  | 0.53  | -0.02 | 0.58  |   |
|           | 0.78       | 0          | 0.43  | 0.93 | 0.92  | 0.89 | 0.46 | 0.76  | 0.28  | 0.02  | -0.05 | -0.1  | - |
|           | 0.34       |            |       |      |       |      |      |       |       |       |       |       |   |
| GENE2023X | 15867_at   | 15867_at   | 1     | 0.13 | 0.01  | 0.26 | 0.72 | 1.38  | 1.18  |       |       |       |   |
|           | 0.73       | 0.62       | 0.72  | 0.77 | 0.34  | 0.43 | 0.41 | 0.64  | 0.62  | 0.04  | 0.26  | 0.28  |   |
|           | 0.12       | 0.02       | -0.23 | 0.54 | 0.23  | 0.16 | 0.32 | 1.32  | 0.13  | 0.08  | -0.13 | 0.57  |   |
|           | 0.09       |            |       |      |       |      |      |       |       |       |       |       |   |
| GENE2033X | 17522_at   | 17522_at   | 1     | 2.93 | 1.27  | 0.09 | 1.52 | 1.03  | 0.82  | 1     |       |       |   |
|           | 1.35       | 0.97       | 0.44  | 1.63 | 1.32  | 1.36 | 1.44 | -0.21 | 2.2   | 2.15  | 1.61  | 0.69  | - |
|           | 0.91       | -0.12      | 0.38  | 0.76 | 0.11  | 0.56 | 1    | -0.35 | -0.62 | -0.2  | 0.33  | 0.67  |   |
| GENE2032X | 12428_at   | 12428_at   | 1     | 0.23 | 0.94  | 0.12 | 0.6  | 0.96  | 0.12  |       |       |       |   |
|           | 1.09       | 0.42       | 0.16  | 0.23 | 0.97  | 0.64 | 0.71 | 1.13  | 0.2   | 1.08  | -0.25 | 1.18  |   |
|           | 0.26       | -0.08      | -0.43 | -0.2 | -0.02 | 0.2  | 0.5  | 0.4   | -0.83 | -0.1  | 0.07  | 0.04  |   |
|           | 0.41       |            |       |      |       |      |      |       |       |       |       |       |   |
| GENE2272X | 15612_s_at | 15612_s_at | 1     | 1.27 | 1.15  | 1.49 | 1.56 | 2     | 2.31  |       |       |       |   |
|           | 1.14       | 1.2        | 1.51  | 0.72 | 1.17  | 1.19 | 1.19 | 1.23  | 1.37  | 0.97  | 0.87  | 1.65  |   |
|           | 1.64       | 0.52       | 1.04  | 1.49 | 0.94  | 0.81 | 0.2  | 0.38  | 0.02  | 0.08  | 0.08  | -0.15 |   |
|           | 0.05       |            |       |      |       |      |      |       |       |       |       |       |   |
| GENE2271X | 13863_at   | 13863_at   | 1     | 2.73 | 1.89  | 1.63 | 2    | 2.55  | 3.91  |       |       |       |   |
|           | 1.15       | 1.71       | 1.91  | 1.52 | 1.07  | 1.34 | 1.62 | 1.46  | 2.18  | 1.66  | 1.58  | 1.53  |   |
|           | 1.48       | 0.61       | 1.71  | 1.47 | 2.11  | 1.87 | 1.22 | 0.45  | 0.5   | 0.65  | 0.35  | -0.32 | - |
|           | 0.1        |            |       |      |       |      |      |       |       |       |       |       |   |
| GENE2270X | 15171_s_at | 15171_s_at | 1     | 1.53 | 0.65  | 0.58 | 1.05 | 1.02  | 1.56  |       |       |       |   |
|           | 0.55       | 0.78       | 1.23  | 1.28 | 1.18  | 0.94 | 0.85 | 1.09  | 1.21  | 1.01  | 0.98  | 1.26  |   |
|           | 0.76       | 0.51       | 0.48  | 0.58 | 0.97  | 0.89 | 0.84 | 0.35  | 0.16  | 0.25  | 0.65  | 0.22  |   |
|           | 0.29       |            |       |      |       |      |      |       |       |       |       |       |   |
| GENE1998X | 17174_at   | 17174_at   | 1     | 1.17 | 0.85  | 0.84 | 0.87 | 1.4   | 1.7   |       |       |       |   |
|           | 0.23       | 0.92       | 1.4   | 1.11 | 0.94  | 0.87 | 0.87 | 1.01  | 1.04  | 0.73  | 1.07  | 0.94  |   |
|           | 0.04       | 0.21       | 0.35  | 0.94 | 0.52  | 0.46 | 0.71 | 0.25  | -0.53 | 0.05  | 0     | 0.15  |   |
|           | 0.32       |            |       |      |       |      |      |       |       |       |       |       |   |
| GENE2051X | 19149_at   | 19149_at   | 1     | 0.55 | 0.35  | 0.72 | 0.58 | 0.63  | 1.04  |       |       |       |   |
|           | 0.47       | 0.62       | 0.6   | 0.81 | 1.09  | 0.84 | 0.84 | 0.76  | 0.49  | 0.67  | 0.52  | 0.85  |   |
|           | 0.64       | -0.53      | 0.09  | 0.68 | 0.2   | 0.27 | 0.25 | 0.34  | 0.15  | 0.18  | 0.15  | -0.2  |   |
|           | 0.02       |            |       |      |       |      |      |       |       |       |       |       |   |
| GENE2000X | 14243_at   | 14243_at   | 1     | 0.76 | 0.73  | 0.78 | 0.85 | 1.48  | 2.39  |       |       |       |   |
|           | 0.41       | 0.75       | 1.02  | 0.67 | 0.92  | 1    | 0.94 | 0.77  | 0.84  | 0.51  | 0.29  | 0.96  | 1 |
|           | 0.32       | -0.21      | 1.2   | 0.45 | 0.43  | 0.37 | 0.52 | -0.13 | 0     | -0.04 | -0.18 | 0.02  | - |
| GENE2008X | 19635_at   | 19635_at   | 1     | 1.4  | 1.32  | 1.96 | 1.2  | 2.2   | 2.48  |       |       |       |   |
|           | 1.79       | 1.65       | 1.72  | 0.83 | 1.17  | 1.23 | 1.51 | 1.17  | 1.68  | 1.15  | 1.55  | 1.14  |   |



|           |            |            |       |       |       |       |       |       |       |      |       |       |       |
|-----------|------------|------------|-------|-------|-------|-------|-------|-------|-------|------|-------|-------|-------|
| GENE2041X | 15600_s_at | 15600_s_at | 1     | 1.16  | 0.61  | 0.29  | 0.25  | 0.18  | 1.52  |      |       |       |       |
|           | 1.23       | 2.73       | 1.08  | 1.44  | 1.2   | 1.5   | 1.37  | 2.27  | 1.37  | 1.34 | 1.63  | 1.09  | -     |
|           | 0.15       | 0.29       | 0.26  | -0.05 | 0.46  | 0.65  | 0.51  | 0.59  | 0.09  | 0.28 | 0.36  | 0.45  | 0.49  |
| GENE2040X | 19463_s_at | 19463_s_at | 1     | 0.91  | 0.88  | 0.73  | 0.61  | 0.65  | 0.2   |      |       |       |       |
|           | 1.41       | 1.04       | 1.27  | 1.52  | 1.43  | 1.73  | 1.53  | 1.79  | 1.15  | 1.51 | 1.37  | 0.79  | -     |
|           | 0.32       | 0.2        | 0.45  | 0.07  | 0.53  | 0.29  | 0.13  | -0.3  | -0.45 | 0.11 | 0.09  | 0.21  | 0.51  |
| GENE2039X | 13236_at   | 13236_at   | 1     | 0.96  | 0.76  | 0.91  | 0.85  | 0.46  | 0.02  |      |       |       |       |
|           | 1.4        | 1.03       | 0.71  | 1.63  | 1.18  | 1.72  | 1.15  | 1.41  | 1.32  | 1.29 | 1.2   | 0.97  | -     |
|           | 0.23       | 0.26       | 0.84  | -0.2  | 0.68  | 0.27  | -0.04 | -0.35 | 0.07  | 0.25 | 0.22  | -0.02 | 0.18  |
| GENE2038X | 20560_at   | 20560_at   | 1     | 0.69  | 0.02  | -0.05 | 0.62  | 1.05  | 1.02  |      |       |       |       |
|           | 0.22       | 0.56       | 1.37  | 1.1   | 1.13  | 1.07  | 0.79  | 1.24  | 0.98  | 1.06 | 0.92  | 0.48  | -     |
|           | 0.83       | 0.37       | 0.25  | -0.12 | 0.87  | 0.79  | 0.58  | 0.37  | -0.88 | 0.18 | 0.41  | 0.29  | 0.43  |
| GENE2037X | 15065_at   | 15065_at   | 1     | 0.93  | 0.17  | 0.37  | 0.23  | 0.78  | 0.78  |      |       |       |       |
|           | 0.54       | 0.61       | 1.01  | 0.75  | 0.47  | 0.66  | 0.63  | 0.92  | 0.53  | 0.92 | 1.11  | 0.12  | -     |
|           | 0.53       | 0.33       | 0     | -0.1  | 0.41  | 0.37  | 0.44  | 0.55  | -0.35 | 0.26 | 0.26  | 0.25  | 0.32  |
| GENE2036X | 16566_s_at | 16566_s_at | 1     | 1.06  | 0.82  | 0.28  | 0.27  | 1.06  | 0.85  |      |       |       |       |
|           | 0.31       | 0.8        | 1.55  | 2.32  | 1.15  | 2.11  | 1.56  | 1.74  | 1.62  | 1.7  | 1.43  | 0.37  | -     |
|           | 0.73       | 0.04       | -0.16 | 0.36  | -0.3  | -0.15 | -0.21 | 0.31  | -0.57 | 0.28 | 0.22  | -0.13 | -0.04 |
| GENE2035X | 15894_at   | 15894_at   | 1     | 0.27  | 0.57  | 0.16  | 0.02  | 0.59  | 0.51  |      |       |       |       |
|           | 0.5        | 0.54       | 1.14  | 1.67  | 1.04  | 1.49  | 1.19  | 1.28  | 1.34  | 0.92 | 1.1   | 0.11  | -     |
|           | 0.37       | -0.25      | 0.12  | 0.33  | -0.07 | -0.07 | 0.21  | 0.45  | -0.45 | 0.27 | 0.18  | 0     | 0.17  |
| GENE2034X | 13140_at   | 13140_at   | 1     | 0.26  | 0.13  | 0.28  | 0.07  | 0.23  | 0.26  |      |       |       |       |
|           | 0.44       | 0.38       | 0.74  | 0.97  | 0.98  | 0.73  | 0.85  | 1     | 0.79  | 0.81 | 1.23  | 0.82  | -     |
|           | 0.3        | 0.34       | 0.2   | 0.22  | -0.01 | 0.07  | 0.04  | 0.45  | -0.32 | 0.33 | 0.08  | 0.01  | 0.2   |
| GENE1859X | 18102_at   | 18102_at   | 1     | 0.79  | 0.07  | 0.82  | 0.61  | 0.66  | 0.7   |      |       |       | -     |
|           | 0.39       | 0.42       | 0.85  | 1.32  | 0.94  | 0.11  | 0.65  | 1.13  | 1     | 1.2  | 1.44  | 0.84  | 0.29  |
|           | 0.34       | -0.05      | 0.48  | -0.15 | 0.04  | 0.12  | 0.8   | 0.87  | 0.32  | -0.3 | 0.23  | 0.42  | -     |
| GENE2048X | 16538_at   | 16538_at   | 1     | 2.53  | 1.87  | 1.68  | 2.07  | 1.97  | 2.26  |      |       |       |       |
|           | 2.22       | 2.1        | 1.73  | 1.44  | 1.7   | 2.11  | 1.91  | 2.01  | 1.57  | 1.79 | 2.14  | 1.39  | -     |
|           | 0.04       | 0.75       | 0.53  | 1.05  | 1.32  | 1.15  | 1.07  | -0.05 | -0.55 | 0.45 | 0.41  | 0.18  | 0.57  |
| GENE2047X | 12136_at   | 12136_at   | 1     | 0.41  | 1.29  | 1.05  | 1.05  | 1.66  | 1.15  |      |       |       |       |
|           | 1.64       | 1.02       | 1.47  | 1.38  | 1.47  | 1.6   | 1.66  | 1.52  | 1.25  | 1.11 | 1.39  | 0.95  | -     |
|           | 0.04       | 0.29       | 0.32  | 0.89  | 0.61  | 0.68  | 0.83  | 0.67  | -0.57 | 0.17 | 0.15  | 0.07  | 0.2   |
| GENE2046X | 18898_s_at | 18898_s_at | 1     | 0.86  | 0.69  | 0.43  | 0.31  | 0.95  | 1.27  |      |       |       |       |
|           | 0.94       | 1.12       | 1.37  | 0.97  | 1     | 1.1   | 1.16  | 1.23  | 0.94  | 0.91 | 0.71  | 0.89  | -     |
|           | 0.26       | 0.2        | 0.13  | 1     | 0.5   | 0.49  | 0.54  | -0.51 | -1.02 | 0.27 | 0.32  | -0.08 | 0.21  |
| GENE2045X | 13117_at   | 13117_at   | 1     | 0.31  | 0.77  | 0.42  | 0.48  | 0.87  | 1.38  |      |       |       |       |
|           | 0.72       | 1.17       | 1.03  | 0.52  | 0.67  | 0.76  | 0.72  | 0.77  | 0.56  | 0.64 | 0.12  | 0.82  | 0     |
|           | 0.32       | 0.33       | 0.51  | 0.44  | 0.46  | 0.51  | -0.16 | 0.07  | 0.26  | 0.26 | 0.05  | 0.21  |       |
| GENE2044X | 20314_s_at | 20314_s_at | 1     | 0.72  | 1.09  | 0.11  | 0.52  | 0.77  | 1.15  | 0    |       |       |       |
|           | 0.47       | 0.7        | 1     | 0.97  | 1.61  | 1.37  | 0.88  | 0.94  | 1.05  | 0.93 | 0.41  | -0.18 |       |
|           | 0.65       | 0.35       | 0.27  | 0.43  | 0.36  | 0.35  | 0.78  | 0.01  | 0.09  | 0.35 | 0.4   | 0.4   |       |
| GENE2043X | 20611_at   | 20611_at   | 1     | 0.32  | 0.74  | 0.26  | 0.32  | 0.71  | 1.25  |      |       |       |       |
|           | 0.34       | 0.57       | 0.73  | 0.38  | 0.72  | 0.65  | 0.56  | 0.28  | 0.59  | 0.48 | 0.81  | 0.58  | -     |
|           | 0.53       | 0.45       | 0.01  | 0.7   | 0.08  | 0.18  | 0.55  | 0.51  | 0.08  | 0    | 0.22  | 0.15  | 0.26  |
| GENE2001X | 15915_at   | 15915_at   | 1     | 1.64  | 1.09  | 0.71  | 1.13  | 1.77  | 2.19  |      |       |       |       |
|           | 0.01       | 0.2        | 0.87  | 0.9   | 1.05  | 1.05  | 1.09  | 0.33  | 1.19  | 1.61 | 0.33  | 1.02  | -     |
|           | 0.41       | 0.31       | 0.63  | 0.87  | 0.95  | 1     | 0.91  | -0.23 | -1.15 | 0.53 | 0.84  | -0.55 | -0.25 |
| GENE1866X | 14434_at   | 14434_at   | 1     | 0.46  | 0.84  | 0     | 0.25  | 1.51  | 1.74  |      |       |       |       |
|           | 0.15       | 0.35       | 1.42  | 0.36  | 0.7   | 1.15  | 1.15  | 0.63  | 0.56  | 0.92 | 0.87  | 0.46  | -     |
|           | 0.21       | 0.04       | -0.07 | 0.66  | -0.08 | 0.11  | 0.35  | -0.28 | -0.57 | 0.23 | 0.42  | -0.43 | 0.04  |
| GENE1865X | 20566_s_at | 20566_s_at | 1     | -0.04 | 0.71  | -0.21 | -0.07 | 0.9   | 1.11  |      |       |       |       |
|           | 0.02       | 0.27       | 1.54  | 0.93  | 0.79  | 1.29  | 0.97  | 0.7   | 0.73  | 0.83 | 1.08  | 0.36  | -0.66 |
|           | 0.23       | -0.15      | 0.87  | -0.26 | 0.16  | 0.5   | 0.18  | -0.59 | 0.23  | 0.4  | -0.02 | 0.33  |       |
| GENE1879X | 18437_at   | 18437_at   | 1     | 1     | -0.49 | 0     | -0.59 | -0.37 | 1.6   |      |       |       |       |
|           | 0.73       | 2.05       | 0.68  | 0.48  | 1.15  | -0.23 | -0.49 | 2.5   | 1.48  | 2    | 2.5   | 0.91  |       |





|           |            |            |       |       |       |       |       |       |       |       |       |       |    |
|-----------|------------|------------|-------|-------|-------|-------|-------|-------|-------|-------|-------|-------|----|
| GENE1869X | 20081_at   | 20081_at   | 1     | 0.65  | 0.22  | -1.21 | -0.35 | 0.21  | 1.13  | -     |       |       |    |
| 0.07      | 0.47       | 0.64       | 0.38  | 0.5   | 1.19  | 1.58  | 1.02  | 0.38  | 1.83  | 2.14  | 0.54  | -0.91 | -  |
| 1.05      | -0.05      | 0.26       | -1.05 | -0.83 | -0.47 | -0.28 | -0.66 | 0.2   | -0.2  | -0.71 | -0.2  |       |    |
| GENE1858X | 12966_s_at | 12966_s_at | 1     | 0.8   | 0.23  | 0.46  | 0.62  | 0.95  | 1.48  |       |       |       |    |
| 0.21      | 1.61       | 0.94       | 1.74  | 1.15  | 1.89  | 1.69  | 1.96  | 1.82  | 1.05  | 0.26  | 0.78  | -     |    |
| 0.02      | -0.91      | -1         | -0.28 | -0.97 | -0.43 | -0.49 | -0.55 | -0.91 | -0.59 | -0.32 | -0.2  | 0.33  |    |
| GENE1857X | 15053_at   | 15053_at   | 1     | 0.6   | 1.65  | 0.12  | 0.46  | 0.63  | 1.22  | -     |       |       |    |
| 0.25      | 0.46       | 1          | 1.89  | 1.83  | 1.68  | 1.47  | 1.91  | 1.39  | 1.14  | 0.75  | 1.13  | 0.41  | -  |
| 0.45      | -1.12      | 0.78       | -1.28 | -1    | -0.49 | -0.64 | -1.18 | -0.26 | -0.18 | -0.55 | -0.1  |       |    |
| GENE1856X | 18259_s_at | 18259_s_at | 1     | -0.21 | 0.08  | 0.46  | 0.34  | 0.47  | 0.34  | -     |       |       |    |
| 0.21      | 0          | 1.15       | 1.89  | 0.9   | 1.05  | 0.65  | 1.22  | 1.03  | 0.9   | 0.65  | 0.18  | -0.23 | -  |
| 0.53      | -1         | -0.02      | -0.73 | -0.45 | -0.15 | -0.23 | -0.3  | -0.25 | -0.15 | 0.21  | 0.48  |       |    |
| GENE1855X | 18484_at   | 18484_at   | 1     | 0.34  | 0.07  | 0.01  | -0.51 | 0.05  | 0.45  | -     |       |       |    |
| 0.26      | 0.65       | 1.04       | 1.48  | 0.85  | 1.13  | 0.86  | 1.44  | 0.97  | 1.07  | 1.13  | 0.44  | -0.66 | -  |
| 0.32      | -0.62      | -0.18      | -1.05 | -0.71 | -0.28 | -1.02 | -0.59 | -0.2  | 0     | -0.02 | 0.41  |       |    |
| GENE1854X | 20582_s_at | 20582_s_at | 1     | 0.64  | 0.75  | 0.69  | 0.84  | 0.52  | 0.23  | -     |       |       |    |
| 0.65      | 0.72       | 0.25       | 1.27  | 1.18  | 1.26  | 1.18  | 1.17  | 1.09  | 0.68  | 0.44  | 0.22  | -     |    |
| 0.39      | -0.64      | -0.51      | -0.88 | -1    | -0.97 | -0.73 | -0.55 | -0.02 | -0.08 | 0.09  | -0.18 | 0.01  |    |
| GENE1853X | 14252_f_at | 14252_f_at | 1     | 0.26  | 0.58  | -0.04 | 0.8   | 0.38  | 0.35  | -     |       |       |    |
| 0.56      | 0.34       | 0.83       | 1.25  | 1.63  | 1.76  | 1.96  | 1.22  | 1.49  | 1.54  | 1.05  | 1.26  | -     |    |
| 0.78      | -0.71      | -0.51      | -1.12 | -0.47 | -0.91 | -0.64 | -0.45 | -0.64 | -0.51 | -0.47 | -0.83 | 0.01  |    |
| GENE1852X | 14251_f_at | 14251_f_at | 1     | 0.01  | 0.48  | -0.51 | 0.45  | 0.25  | 0.07  | -     |       |       |    |
| 0.67      | 0.38       | 0.51       | 1.09  | 1.21  | 1.2   | 1.13  | 1.36  | 1.05  | 1.17  | 0.75  | 0.84  | -     |    |
| 0.73      | -0.64      | -0.3       | -1.05 | -0.91 | -1.08 | -0.86 | -0.18 | -0.32 | -0.18 | -0.53 | -0.39 | -0.02 |    |
| GENE1843X | 15406_at   | 15406_at   | 1     | 0.11  | 0.94  | -1.28 | -0.45 | 1.11  | 1.46  | -     |       |       |    |
| 0.88      | 0.71       | 2.8        | 1.93  | 2.16  | 2     | 2     | 1.62  | 1.85  | 1.31  | 1.22  | 1.63  | -0.45 |    |
| 0.44      | 1.31       | 0.43       | 0.28  | -0.21 | 0.17  | 1.65  | 0.43  | 0.08  | 0.16  | -0.2  | -0.15 |       |    |
| GENE1842X | 18599_at   | 18599_at   | 1     | -2.25 | 0.87  | -0.91 | 0.33  | 0.23  | 1.32  | 1     |       |       |    |
| 0.85      | 2.12       | 1.87       | 2.33  | 2.34  | 2.17  | 2.34  | 2.55  | 1.44  | 1.17  | 2.24  | 1.41  |       |    |
| 1.11      | 2.05       | 1.64       | 0.02  | 0.29  | 0.2   | 1.62  | -0.35 | 0.5   | 0.35  | -0.26 | -0.47 |       |    |
| GENE1841X | 15965_at   | 15965_at   | 1     | -1.25 | 0.37  | -0.62 | -1.59 | 0.88  | 0.35  | -     |       |       |    |
| 0.34      | 0.12       | 1.83       | 2.11  | 1.68  | 2.67  | 2.52  | 3.36  | 1.63  | 0.55  | -0.35 | 1.22  | -     |    |
| 1.18      | -0.26      | 1.22       | -0.49 | -0.49 | 0.18  | -0.49 | 0     | 0     | -0.26 | 0     | -0.26 | -0.47 |    |
| GENE1840X | 15981_at   | 15981_at   | 1     | -1.05 | 0.45  | -1.21 | -0.2  | -0.55 | -0.73 | -2    |       |       |    |
| 0.2       | 2.31       | 2.28       | 2.05  | 3.77  | 3.66  | 3.02  | 2     | 1.3   | 0.25  | 1.98  | -0.51 | -     |    |
| 0.62      | -0.53      | -0.73      | -0.81 | -0.78 | -0.53 | -0.13 | -0.2  | 0.25  | 0.22  | -0.59 | -0.13 |       |    |
| GENE1839X | 19549_s_at | 19549_s_at | 1     | 1.05  | -0.86 | -0.35 | 0.11  | 0     | 0.6   | -     |       |       |    |
| 0.38      | 1.11       | 0.91       | 1.47  | 1.66  | 0.78  | 0.81  | 2.23  | 1.76  | 1.41  | 0.51  | 1.71  | -     |    |
| 0.21      | 0.07       | 0.4        | -0.35 | -0.34 | -0.34 | -0.71 | -0.39 | -0.28 | 0.26  | -0.12 | -0.59 | 0.11  |    |
| GENE1838X | 12947_at   | 12947_at   | 1     | 0.25  | -0.1  | -1.32 | -0.3  | -0.39 | 0.09  | -     |       |       |    |
| 0.41      | 0.51       | 0.66       | 2.97  | 1.91  | 1.36  | 0.94  | 1.86  | 2.29  | 0.25  | 0.54  | 0.34  | 0     |    |
| -0.3      | 0.21       | 0          | -0.04 | -0.16 | 0.81  | 0     | 0.45  | -0.07 | 0.58  | -0.53 | -0.47 |       |    |
| GENE1851X | 18351_at   | 18351_at   | 1     | 1.04  | 0.57  | -0.91 | 0.63  | 1.12  | 0.78  | -     |       |       |    |
| 0.81      | -0.94      | 1.57       | 1.53  | 1.65  | 1.65  | 1.71  | 0.78  | 1.53  | 1.67  | 1.59  | 1.26  | -0.28 | -  |
| 0.15      | -0.81      | 0.25       | -0.08 | 0.17  | 0.09  | -0.49 | -0.57 | 0.18  | 0.11  | -0.1  | 0.13  |       |    |
| GENE1850X | 16627_s_at | 16627_s_at | 1     | 0.26  | 0.07  | 0.12  | 0.32  | 0.44  | 0.36  | -     |       |       |    |
| 0.18      | 0.05       | 1.01       | 1.26  | 1.28  | 0.95  | 0.73  | 0.58  | 1.01  | 1.08  | 0.86  | 1     | -0.21 | -  |
| 0.25      | 0.02       | 0          | -0.02 | -0.1  | -0.02 | 0.27  | 0.23  | 0.12  | 0.2   | 0.26  | 0.2   |       |    |
| GENE1849X | 14240_s_at | 14240_s_at | 1     | 0.71  | 0.27  | -0.28 | 0.69  | 0.22  | 1.97  | -     |       |       |    |
| 0.94      | 0.94       | 2.03       | 2.65  | 3.55  | 2.65  | 2.44  | 1.34  | 2.19  | 2.37  | 2.47  | 2.82  | 0.76  | -  |
| 0.57      | -0.97      | 0.26       | -0.47 | -0.47 | -0.68 | -0.37 | -2    | -0.68 | -0.34 | -0.3  | 0.23  |       |    |
| GENE1848X | 16820_at   | 16820_at   | 1     | 0.46  | 1.37  | -0.64 | 0.56  | 0.26  | -1    | -     |       |       |    |
| 0.55      | 0.05       | 1.13       | 1.35  | 1.73  | 2.56  | 2.24  | 1.76  | 1.07  | 1.65  | 0.05  | 1.17  | -0.97 | -1 |
| -0.47     | -0.73      | -0.23      | 0.18  | 0.65  | -1.59 | -0.64 | -0.64 | 0.31  | -0.73 | -0.32 |       |       |    |
| GENE1845X | 14573_at   | 14573_at   | 1     | 2.97  | 1.7   | -1.47 | 1.38  | -0.07 | -0.62 | -     |       |       |    |
| 0.32      | 0.84       | 1.44       | 3.12  | 3.58  | 3.41  | 2.97  | 2.71  | 2.71  | 3.44  | 1.65  | 2.94  | -0.71 | -  |
| 0.49      | 0.67       | -1.08      | -0.26 | -0.26 | -0.26 | 0     | 0.26  | 0     | 1     | -0.49 | -0.23 |       |    |

|           |            |            |       |       |       |       |       |       |       |       |       |       |   |
|-----------|------------|------------|-------|-------|-------|-------|-------|-------|-------|-------|-------|-------|---|
| GENE1844X | 12744_at   | 12744_at   | 1     | 0.69  | 1.09  | -0.47 | 1.02  | -0.51 | -1.43 | -     |       |       |   |
| 0.05      | 0.38       | 0.79       | 1.51  | 1.86  | 2.37  | 1.94  | 1.93  | 1.39  | 1.32  | 0.16  | 1.47  | -0.12 | - |
| 1.08      | 0.13       | -0.76      | 0.08  | -0.62 | -0.43 | -0.53 | 0.12  | 0.02  | -0.16 | -0.68 | -0.16 |       |   |
| GENE1361X | 16911_at   | 16911_at   | 1     | 0     | 0     | -1.21 | 0.16  | 0     | 0     |       |       |       | - |
| 0.49      | -0.49      | 2.07       | 1.32  | 2.85  | 2.76  | 1.84  | 1.71  | 1.12  | 1.39  | 1.39  | 2     | -0.41 | - |
| 2.32      | -1.21      | 0          | -1.94 | -2.25 | -0.37 | -0.88 | -0.66 | -0.73 | -0.25 | -2.12 | -1    |       |   |
| GENE1360X | 16310_at   | 16310_at   | 1     | -0.23 | 0.08  | -0.57 | -0.26 | 0.07  | -0.73 | -     |       |       |   |
| 0.32      | -0.86      | 1.22       | 1.23  | 1.89  | 1.2   | 1.33  | 1     | 1.49  | 0.77  | 0.61  | 1.68  | -0.45 | - |
| 0.28      | -0.34      | -0.37      | -0.07 | 0.01  | 0.18  | -0.64 | -0.45 | 0.23  | 0.34  | -0.13 | -0.1  |       |   |
| GENE1359X | 15750_at   | 15750_at   | 1     | -0.12 | -0.21 | -0.88 | 0.13  | 0.02  | -0.66 | -     |       |       |   |
| 0.68      | -0.59      | 1.52       | 2.28  | 2.73  | 2.13  | 2.26  | 1.21  | 1.59  | 1.58  | 0.44  | 2.02  | -0.34 | - |
| 0.64      | -0.26      | -0.47      | -1.08 | -1.15 | -0.37 | -0.47 | -0.62 | -0.07 | -0.18 | -0.32 | -0.2  |       |   |
| GENE1358X | 19373_at   | 19373_at   | 1     | -0.83 | -1.51 | -1.18 | -0.53 | -0.02 | -0.41 | -     |       |       |   |
| 1.05      | -0.88      | 1.85       | 2.27  | 2.53  | 1.64  | 1.39  | 1.86  | 1.86  | 1.01  | 0.57  | 1.96  | -0.53 | - |
| 1.05      | -1.02      | 0.36       | -1.15 | -0.94 | -0.07 | -0.86 | -1.43 | 0.21  | 0.46  | -0.23 | -0.12 |       |   |
| GENE1357X | 18197_at   | 18197_at   | 1     | -0.45 | -0.68 | -0.16 | -1.47 | -0.08 | 0.2   | -     |       |       |   |
| 1.05      | -0.47      | 1.6        | 2.36  | 2.16  | 1.66  | 1.79  | 0.67  | 2.37  | 1.88  | 1.35  | 1.27  | -0.86 | - |
| 0.81      | -0.86      | -0.39      | -1.64 | -0.86 | -0.51 | -0.47 | -0.3  | -0.07 | 0.09  | -0.1  | 0.02  |       |   |
| GENE1356X | 16565_at   | 16565_at   | 1     | -1.08 | -0.15 | -0.83 | -0.59 | -0.64 | -0.28 | -     |       |       |   |
| 1.59      | -0.88      | 1.2        | 3.39  | 2.35  | 2.14  | 1.42  | 1.68  | 2.93  | 1.58  | 1.02  | 1.37  | -0.59 | - |
| 0.86      | -1.51      | -1         | -1.21 | -0.91 | 0     | -0.18 | -0.64 | -0.62 | -0.15 | 0     | 0.01  |       |   |
| GENE1981X | 20042_at   | 20042_at   | 1     | 1.76  | 1.61  | 1.05  | 1.35  | 1.39  | 0.37  | -     |       |       |   |
| 1.11      | 0.62       | 0.51       | 1.12  | 0.69  | 0.61  | 0.51  | 1.19  | 0.62  | 0.28  | 0     | 0.58  |       | - |
| 0.73      | -0.18      | -0.15      | -0.1  | -0.68 | -0.43 | -0.08 | -0.32 | -0.68 | 0.35  | 0.27  | -0.34 | 0.08  |   |
| GENE1976X | 12394_at   | 12394_at   | 1     | 1.87  | 1.23  | 1.61  | 1.74  | 1.72  | 0.73  | -     |       |       |   |
| 1.13      | 0.87       | 0.2        | 0.41  | 1.18  | 0.34  | 0.68  | 0.4   | 0.32  | 0.83  | 0.64  | 0.6   |       | - |
| 0.3       | -0.39      | -0.62      | -0.91 | -0.25 | -0.37 | 0.4   | -0.39 | -1.05 | 0.26  | 0.31  | 0.11  | 0.6   |   |
| GENE1975X | 12921_s_at | 12921_s_at | 1     | 1.03  | 0.97  | 1     | 1.2   | 0.7   | 0.71  | -     |       |       |   |
| 0.44      | 1.1        | 0.05       | 0.48  | 0.42  | 0.36  | 0.28  | 0.51  | 0.6   | 0.01  | 0.07  | -0.35 | -     |   |
| 0.13      | -1.18      | -0.62      | -0.45 | -0.39 | -0.16 | -0.3  | -0.34 | -0.66 | -0.43 | -0.32 | 0.15  | -0.01 |   |
| GENE1399X | 20658_s_at | 20658_s_at | 1     | 1.38  | 0.75  | -0.02 | 0.59  | 1.12  | -0.13 | -     |       |       |   |
| 0.48      | 0.32       | 0.04       | 0.12  | 0.32  | 0.36  | 0.41  | 0.09  | 0.27  | 0.87  | 0.47  | 0.07  |       | - |
| 1.12      | -0.59      | -1.47      | -0.68 | -0.76 | -0.66 | -0.39 | -1.08 | -1.32 | -0.35 | -0.18 | 0.02  | 0.4   |   |
| GENE1485X | 18587_s_at | 18587_s_at | 1     | 0.42  | 0.09  | 2.23  | 1.2   | 2.36  | 1.15  | -     |       |       |   |
| 1.18      | 0.35       | 1.11       | 0.79  | 0.37  | 0.09  | -0.18 | 0.43  | 0.59  | 0.65  | -0.23 | -0.12 |       | - |
| 1.59      | -1.15      | -0.51      | -0.26 | -0.21 | -1.12 | -0.59 | -0.64 | -0.26 | 0.08  | 0.26  | 0.08  | 0.41  |   |
| GENE1484X | 15670_s_at | 15670_s_at | 1     | -0.07 | 0.66  | 1.43  | 0.33  | 1.16  | 0.13  | -     |       |       |   |
| 0.68      | -0.28      | 0.52       | 0.07  | 0.01  | 0.23  | 0.34  | -0.23 | 0.26  | 0.42  | 0.22  | -0.08 |       | - |
| 1.08      | -0.57      | -0.43      | 0.31  | -0.91 | -0.91 | -0.68 | -0.68 | -0.78 | 0.15  | 0.27  | -0.64 | -0.18 |   |
| GENE1468X | 18950_at   | 18950_at   | 1     | 0.46  | 0.09  | -0.13 | 0.61  | 0.93  | -0.3  | -     |       |       |   |
| 1.04      | -0.13      | 0.05       | 0.32  | 0.62  | -0.71 | -0.49 | 0.41  | -0.2  | -0.76 | 0.15  | 0.35  |       | - |
| 0.91      | 0.29       | -0.94      | -0.43 | -0.34 | -0.16 | 0.29  | -0.07 | -0.68 | 0.27  | 0.2   | 0.08  | -0.18 |   |
| GENE1455X | 16374_s_at | 16374_s_at | 1     | 1.13  | 0     | 0     | 0     | 3.37  | 0     | -     |       |       |   |
| 3.13      | 0          | 0          | 0     | 0     | 0     | 0     | 0     | 0     | 0     | 0     | 0     |       | 0 |
| 0         | 0          | 0          | 0     | 0     | 0     | 0     | 0.26  | 0     | 0     | 0     | 0     |       |   |
| GENE1489X | 20299_at   | 20299_at   | 1     | 1.25  | -0.37 | 0.76  | 0.89  | 1.44  | 1.08  | -     |       |       |   |
| 0.47      | 0.29       | 0.37       | 0.07  | 0.02  | -0.59 | -0.28 | 0.34  | -0.39 | -0.64 | 0.01  | 0.11  |       |   |
| 0.28      | -1.15      | -1.94      | -0.12 | -1.18 | -0.83 | 0.13  | -0.34 | -1.64 | -0.66 | -0.86 | -0.1  |       | - |
| 0.23      |            |            |       |       |       |       |       |       |       |       |       |       |   |
| GENE1488X | 20300_g_at | 20300_g_at | 1     | 1.23  | 0.08  | 1     | 1.05  | 1.34  | 1.18  | -     |       |       |   |
| 0.62      | 0.54       | 0.34       | 0.21  | -0.07 | -0.64 | -0.26 | 0.56  | -0.07 | -0.53 | 0.01  | 0.05  |       |   |
| 0.33      | -1.02      | -1.94      | -0.2  | -0.73 | -0.34 | 0.49  | -0.43 | -1.02 | -0.73 | -0.71 | -0.13 |       |   |
| 0.04      |            |            |       |       |       |       |       |       |       |       |       |       |   |
| GENE1440X | 14413_at   | 14413_at   | 1     | 0.35  | 0.53  | 0.79  | -0.05 | 1.27  | 0.65  | -     |       |       |   |
| 0.93      | 0.07       | 0.67       | -0.12 | 0     | 0.37  | 0.47  | 0.43  | -0.12 | 0.33  | 0.41  | -0.05 |       | - |
| 0.55      | 0.02       | -0.3       | 0.87  | -0.3  | -0.12 | 0.01  | 0.34  | -1.25 | -0.12 | 0     | -0.28 | 0.17  |   |

|           |            |            |       |       |       |       |       |       |       |       |       |       |       |
|-----------|------------|------------|-------|-------|-------|-------|-------|-------|-------|-------|-------|-------|-------|
| GENE1439X | 12231_at   | 12231_at   | 1     | 0.22  | 0.32  | -0.04 | 0.27  | 1.27  | 1.51  |       |       |       |       |
|           | 0.8        | 0.73       | 1.15  | 0.5   | 0.23  | 0.68  | 0.62  | 0.73  | 0.53  | 0.07  | -0.25 | 0.31  | -     |
|           | 0.13       | -0.18      | -0.39 | 1.33  | -0.41 | 0.07  | 0.15  | -0.04 | -1.43 | -0.18 | -0.15 | -0.18 | -0.12 |
| GENE1438X | 15036_r_at | 15036_r_at | 1     | 0.28  | 0.63  | 0.41  | 0.04  | 1.39  | 0.96  |       |       |       |       |
|           | 0.56       | 0.26       | 0.62  | -0.2  | -0.12 | 0.43  | 0.6   | 0.34  | -0.26 | 0.07  | 0.12  | -0.32 | -     |
|           | 0.73       | -0.26      | -1    | 0.26  | -0.68 | -0.34 | 0.28  | -0.35 | -0.49 | -0.66 | -0.39 | 0.01  | 0.17  |
| GENE1437X | 18947_i_at | 18947_i_at | 1     | 0.04  | 0.56  | 0.32  | 0.21  | 1.14  | 1.19  |       |       |       |       |
|           | 0.74       | 0.41       | 0.64  | -0.39 | 0.11  | 0.43  | 0.48  | 0.45  | 0.05  | -0.2  | -0.07 | -0.05 | -     |
|           | 0.25       | 0.04       | -0.62 | 0.81  | -0.2  | -0.25 | -0.01 | -0.04 | -0.53 | -0.25 | -0.15 | -0.12 | 0.23  |
| GENE1436X | 12592_at   | 12592_at   | 1     | 0.79  | -0.01 | -0.49 | -0.12 | 0.94  | 1     |       |       |       |       |
|           | 0.13       | 0.16       | 0.61  | -0.66 | 0.11  | 0.15  | 0.32  | 0.41  | 0.02  | 0.47  | 0.12  | 0.18  | -     |
|           | 0.15       | -0.16      | -0.57 | 0.6   | -0.59 | -0.2  | -0.02 | 0.05  | -1.51 | -0.39 | -0.88 | -0.12 | -0.21 |
| GENE1480X | 18601_s_at | 18601_s_at | 1     | 0.48  | 0.16  | 0.35  | 0.07  | 0.75  | 1.17  |       |       |       |       |
|           | 0.69       | 0.96       | -0.3  | 0.07  | -0.62 | 0.16  | 0.12  | 0.23  | 0.63  | -0.91 | -0.81 | -0.28 | -     |
|           | 0.97       | -0.86      | -0.55 | 0.17  | -0.55 | -0.57 | -0.55 | -0.43 | -1    | 0.46  | 0.34  | -1.15 | -1.35 |
| GENE1482X | 17877_g_at | 17877_g_at | 1     | 2.15  | -0.07 | 0.28  | 1.35  | 1.51  | 0.48  |       |       |       |       |
|           | 0.61       | 0          | 0.01  | 0.01  | 0.43  | 0.21  | 0.49  | -0.55 | 0.15  | 0.18  | 0.42  | 0.15  | -     |
|           | 0.35       | -1.21      | 0.08  | 0.66  | 0.53  | -0.32 | -0.28 | -0.05 | -2.47 | 0.2   | 0.34  | -1.51 | -1.59 |
| GENE1481X | 17876_at   | 17876_at   | 1     | 1.06  | -0.53 | 0.35  | 1.58  | 1.09  | 0.29  |       |       |       |       |
|           | 0.35       | -0.1       | -0.23 | 0     | 0.37  | 0.27  | 0.52  | -0.73 | 0.27  | -0.12 | -0.66 | 0.6   | -     |
|           | 0.13       | -1.08      | 0.13  | 0.46  | 0.48  | -0.25 | -0.16 | -0.55 | -1.59 | 0     | 0.22  | -1.55 | -1.51 |
| GENE1465X | 12408_at   | 12408_at   | 1     | 0.02  | 0.02  | 0.51  | 0.42  | 1.25  | 0.67  |       |       |       |       |
|           | 0.16       | -0.62      | -0.3  | -0.37 | -0.01 | -0.35 | -0.04 | -0.66 | 0.01  | -0.16 | -0.26 | 0.08  | -     |
|           | 0.37       | -0.97      | -0.62 | 0.56  | 0.12  | 0.16  | 0.29  | 0.04  | -0.64 | -0.02 | 0     | -0.59 | -0.45 |
| GENE1408X | 20061_at   | 20061_at   | 1     | -1.15 | 0.16  | 0.46  | -0.16 | 0.72  | -0.41 |       |       |       |       |
|           | 0.94       | 0.36       | 0.82  | 2.15  | 0.74  | 1.51  | 1.15  | 1.44  | 1.67  | 0.23  | -0.39 | -0.02 | -     |
|           | 1.47       | -2.39      | -1.51 | -0.57 | -2.83 | -2.55 | -1.25 | -0.26 | -0.43 | -0.35 | -0.2  | -0.53 | -0.45 |
| GENE1407X | 16912_at   | 16912_at   | 1     | -0.73 | 0.56  | 0.53  | 0.05  | 0.18  | -0.21 |       |       |       |       |
|           | 0.43       | 0.23       | 0.67  | 0.72  | 0.67  | 0.92  | 0.68  | 0.63  | 0.46  | 0.54  | 0.23  | 0.33  | -     |
|           | 0.43       | -0.53      | -0.91 | 0.05  | -1.02 | -0.94 | -0.83 | -0.57 | -0.55 | -0.37 | -0.28 | -0.34 | -0.08 |
| GENE1406X | 17092_at   | 17092_at   | 1     | 0.01  | 0.11  | 0.17  | -0.34 | 0.16  | 0.02  |       |       |       |       |
|           | 1.03       | 0.82       | 0.29  | 0.58  | 0.34  | 0.43  | 0.48  | 0.5   | 0.4   | 0.6   | 0.32  | 0.2   | -     |
|           | 0.81       | -0.37      | -0.91 | -0.76 | -0.91 | -1.25 | -0.59 | -0.68 | -0.13 | -0.28 | -0.1  | -0.15 | 0.15  |
| GENE1405X | 14595_at   | 14595_at   | 1     | 0.22  | 0.25  | 0.34  | 0.57  | 0.23  | -0.1  |       |       |       |       |
|           | 0.18       | -0.3       | 0.32  | 0.84  | 0.92  | 1.03  | 0.62  | 0.26  | 0.66  | 0.4   | 0.35  | 0.44  | -0.57 |
|           | 0.64       | -0.28      | -0.47 | -0.51 | -1.12 | -0.71 | -0.73 | -0.21 | -0.01 | 0.17  | -0.35 | 0.01  |       |
| GENE1404X | 14733_s_at | 14733_s_at | 1     | 0.32  | 1.66  | 0.68  | 0.93  | 0.21  | -0.86 |       |       |       |       |
|           | 0.33       | 0.2        | 0.71  | 1.3   | 1.23  | 1.45  | 0.82  | 1.03  | 1.19  | 0.69  | 0     | 0.94  | -     |
|           | 0.86       | -1.73      | -0.35 | -0.81 | -1.43 | -1.39 | -1.25 | -1.64 | -0.01 | 0.17  | 0.44  | -0.91 | -0.3  |
| GENE1403X | 13950_at   | 13950_at   | 1     | 0.53  | 0.92  | 0.96  | 0.81  | 0.04  | -0.59 |       |       |       |       |
|           | 0.02       | -0.07      | -0.04 | 1.32  | 0.98  | 0.85  | 0.55  | 0.42  | 0.84  | 0.47  | 0.23  | 0.44  | -     |
|           | 0.13       | -0.39      | -0.66 | -0.68 | -1.39 | -1.39 | -0.97 | -0.51 | -0.83 | -0.26 | -0.21 | -0.08 | 0.21  |
| GENE1402X | 12216_at   | 12216_at   | 1     | 1.89  | 1.72  | 1.14  | 1.72  | 0.22  | 0.81  |       |       |       |       |
|           | 0.48       | 1.44       | -0.28 | 2.96  | 0.76  | 2.56  | 1.48  | 1.29  | 3.21  | 0.23  | -0.47 | 0.67  | -     |
|           | 0.07       | 0.76       | -0.71 | -1.08 | -0.71 | -1.18 | -0.37 | -0.94 | -0.94 | -0.59 | -0.94 | -0.51 | -1    |
| GENE1401X | 12369_at   | 12369_at   | 1     | 0.29  | 0.86  | 1.03  | 0.67  | 0.15  | -0.55 |       |       |       |       |
|           | 1.24       | 0.5        | 0.18  | 0.93  | 0.21  | 1.01  | 0.97  | 1.07  | 0.79  | 0.33  | 0.52  | -0.39 | -     |
|           | 0.57       | -0.55      | -0.23 | -1.05 | -0.21 | 0.01  | -0.35 | 0.49  | -0.66 | -0.04 | -0.57 | 0.08  | 0.29  |
| GENE1400X | 19755_at   | 19755_at   | 1     | 0.07  | 0.04  | 0.95  | 0.58  | -0.35 | -0.05 | 0     |       |       |       |
|           | -0.41      | 0.09       | 0     | 0.33  | 0.16  | 0.23  | 0.08  | 0.58  | 0.17  | 0.25  | -0.25 | -0.32 | -     |
|           | 0.05       | 0.36       | -0.39 | -0.45 | -1.05 | -0.55 | 0.23  | 0     | -0.64 | -0.43 | 0.09  | 0.23  |       |
| GENE1398X | 14868_at   | 14868_at   | 1     | 0.95  | 1.32  | 1     | 0.89  | 0.34  | -0.88 |       |       |       |       |
|           | 1.02       | 0.56       | -0.88 | 0.12  | -0.35 | 0.21  | 0.28  | 0.05  | 0.55  | 0.15  | -0.51 | -0.73 | -     |
|           | 1.35       | -0.41      | -1.47 | -2.18 | -1.51 | -0.64 | -0.64 | -1.59 | -1.32 | -1.47 | -0.47 | -0.55 | 0.32  |
| GENE1397X | 16487_at   | 16487_at   | 1     | 0.26  | 1.19  | 0.59  | 0.43  | 0.23  | -1.05 |       |       |       |       |
|           | 0.95       | 0.31       | -0.37 | -0.2  | 0.01  | 0.93  | 0.87  | 0.34  | 0.21  | 0.35  | -0.13 | -0.1  | -     |
|           | 1.32       | -1.28      | -0.39 | -1.18 | -0.26 | -0.91 | -0.62 | -1.64 | -0.53 | -0.18 | -0.13 | -1.35 | -0.15 |

|           |            |            |       |       |       |       |       |       |       |       |       |       |       |
|-----------|------------|------------|-------|-------|-------|-------|-------|-------|-------|-------|-------|-------|-------|
| GENE1396X | 19700_s_at | 19700_s_at | 1     | -0.28 | 0.23  | 0.23  | -0.23 | 0.07  | -0.88 |       |       |       |       |
|           | 1.2        | -0.18      | 0.07  | -0.23 | -0.12 | 0     | 0.09  | 0.12  | -0.07 | 0.18  | 0.16  | -0.41 | -     |
|           | 0.88       | -0.3       | -0.41 | -0.51 | -0.35 | -0.28 | -0.12 | -0.41 | -0.83 | -0.1  | -0.55 | -0.3  | 0.02  |
| GENE1395X | 12193_at   | 12193_at   | 1     | 0.16  | -0.21 | -0.2  | -0.91 | -0.16 | -0.53 |       |       |       |       |
|           | 0.38       | 0.62       | -0.28 | -0.71 | -0.3  | 0.11  | 0.27  | 0.66  | -0.51 | 0.45  | 0.12  | -0.34 | -     |
|           | 0.86       | -0.78      | -0.57 | -0.2  | -1.02 | -0.94 | -0.91 | -1    | -1.55 | -0.13 | -0.25 | -0.51 | -0.13 |
| GENE1373X | 15523_s_at | 15523_s_at | 1     | 1.21  | -0.59 | -0.08 | 1.11  | 0.77  | -1.47 |       |       |       |       |
|           | 1.19       | 0.47       | 0.52  | 0.15  | 0.88  | 0.42  | 0.63  | 0.77  | 0.02  | 1.07  | 1.89  | 0.54  | -     |
|           | 1.32       | -0.51      | -0.55 | -1.59 | -0.25 | -1.05 | -0.47 | -0.59 | -0.91 | -0.23 | 0.01  | -0.37 | 0.05  |
| GENE1372X | 15886_at   | 15886_at   | 1     | 1.35  | -0.34 | -1.12 | 1.21  | 0.13  | -2.55 |       |       |       |       |
|           | 0.54       | -0.3       | 0.13  | -0.28 | 1.48  | 0.08  | 0.87  | 0.12  | -0.53 | 1.25  | 2.01  | 0.47  | -     |
|           | 1.15       | -0.49      | -0.86 | -2.47 | -1    | -1.32 | -0.49 | -0.66 | -1.83 | -0.53 | -0.18 | -0.49 | 0.46  |
| GENE1371X | 15522_i_at | 15522_i_at | 1     | 1.05  | -1.15 | -0.83 | 0.91  | -0.01 | -2.47 |       |       |       |       |
|           | 0.38       | -0.3       | 0.17  | -0.05 | 1.15  | 0.32  | 0.52  | 0.27  | -0.23 | 1.09  | 1.58  | 0.63  | -     |
|           | 1.08       | -0.76      | -0.88 | -2.39 | -0.83 | -1.18 | -0.39 | -0.81 | -1.25 | -0.64 | -0.18 | -0.53 | 0.08  |
| GENE2560X | 15582_s_at | 15582_s_at | 1     | 2.82  | 2.22  | 2.49  | 2.76  | 1.34  | 1.63  |       |       |       |       |
|           | 2.15       | 2.63       | 0.05  | 1.82  | 0.75  | 1.25  | 1     | 1.44  | 2.07  | 0.85  | 1.08  | 1.24  |       |
|           | 1.45       | 0.88       | 1.4   | 0.44  | 1.17  | 0.84  | 0.46  | 0.35  | 0.47  | 0.17  | 0.25  | 0.25  |       |
|           | 0.27       |            |       |       |       |       |       |       |       |       |       |       |       |
| GENE2559X | 18782_at   | 18782_at   | 1     | 1.82  | 1.28  | 1.53  | 2.1   | 0.98  | 0.61  |       |       |       |       |
|           | 1.07       | 1.11       | 0.02  | 1.38  | 0.97  | 1.03  | 0.8   | 0.76  | 1.69  | 0.41  | 0.17  | 1.14  |       |
|           | 1.36       | 0.81       | 1     | 0.45  | 0.69  | 0.65  | 0.21  | 0.12  | 0.47  | 0.13  | 0.22  | 0     |       |
|           | 0.08       |            |       |       |       |       |       |       |       |       |       |       |       |
| GENE2344X | 12965_at   | 12965_at   | 1     | 2.66  | 1.75  | 2.6   | 3.27  | 2.15  | 1.75  |       |       |       |       |
|           | 1.74       | 2.14       | 0     | 0.86  | 0.73  | 1.04  | 1.19  | 0.96  | 1.89  | 0.55  | -0.28 | 1.09  |       |
|           | 1.09       | 1.96       | 1.93  | 0.68  | 1.8   | 1.67  | 0.87  | 0.34  | -0.73 | -0.28 | 0     | 0     |       |
|           | 0.08       |            |       |       |       |       |       |       |       |       |       |       |       |
| GENE2309X | 14924_at   | 14924_at   | 1     | 3.51  | 3.01  | 2.95  | 4.02  | 2.8   | 2.91  |       |       |       |       |
|           | 2.99       | 3.16       | 0.91  | 1.97  | 1.66  | 1.64  | 1.78  | 2.5   | 2.73  | 0.73  | 0.8   | 2.63  |       |
|           | 3.55       | 2.71       | 3.2   | 1.18  | 2.39  | 2.16  | 0.4   | 0.11  | 0.63  | 0.46  | 0.09  | -0.13 | -     |
|           | 0.08       |            |       |       |       |       |       |       |       |       |       |       |       |
| GENE2308X | 20144_at   | 20144_at   | 1     | 3.38  | 2.95  | 2.71  | 4.63  | 2.59  | 2.57  |       |       |       |       |
|           | 3.19       | 3.38       | 0.53  | 0.65  | 2.17  | 1.7   | 2.02  | 2.38  | 2.06  | 1.05  | 0.58  | 3.48  | 3     |
|           | 2.37       | 2.77       | 1.29  | 1.7   | 1.88  | 0.53  | -0.53 | 0.33  | -0.21 | 0.26  | -0.3  | 0.23  |       |
| GENE2307X | 18591_at   | 18591_at   | 1     | 3     | 1.83  | 2.58  | 3.57  | 1.49  | 1.67  |       |       |       |       |
|           | 2.17       | 2.48       | 0.07  | 0.53  | 1.53  | 0.92  | 1.04  | 1.41  | 1.58  | 1.02  | 0.96  | 2.45  |       |
|           | 1.94       | 1.93       | 2.89  | 0.78  | 2.31  | 1.93  | 0.67  | -0.34 | 0.25  | 0.32  | 0.57  | -0.2  |       |
|           | 0.09       |            |       |       |       |       |       |       |       |       |       |       |       |
| GENE2334X | 15355_at   | 15355_at   | 1     | 1.25  | 1.17  | 1.4   | 1.29  | 0.83  | 1.03  |       |       |       |       |
|           | 0.34       | 0.55       | -0.08 | 1.2   | 0.8   | 0.62  | 0.53  | 0.34  | 1.42  | 0.26  | 0.23  | 0.85  |       |
|           | 1.27       | 1.15       | 1.31  | 0.22  | 0.58  | 0.37  | 0.33  | 0.48  | -0.25 | -0.04 | -0.25 | -0.32 | -     |
|           | 0.02       |            |       |       |       |       |       |       |       |       |       |       |       |
| GENE2340X | 12341_s_at | 12341_s_at | 1     | 1.96  | 1.71  | 3.13  | 2.96  | 2.21  | 2.53  |       |       |       |       |
|           | 1.44       | 1.35       | 1.26  | 2.84  | 1.26  | 0.65  | 0.83  | 0.87  | 2.88  | 0.02  | 0.15  | 2.37  |       |
|           | 3.13       | 0.76       | 1.67  | 1.72  | 1.43  | 1.41  | 1.39  | 0.29  | 1.37  | 0     | 1.37  | -0.23 |       |
|           | 0.32       |            |       |       |       |       |       |       |       |       |       |       |       |
| GENE2339X | 13189_s_at | 13189_s_at | 1     | 2.57  | 1.8   | 2.22  | 3.44  | 1.85  | 1.94  |       |       |       |       |
|           | 1.22       | 1.55       | 0.97  | 1.83  | 1.46  | 1.4   | 1.24  | 1.45  | 1.81  | 0.82  | -0.15 | 1.84  |       |
|           | 1.41       | 1.07       | 2.96  | 0.23  | 2.09  | 1.17  | 0.74  | 0.47  | 0.99  | 0.57  | 0.83  | -0.25 | -     |
|           | 0.13       |            |       |       |       |       |       |       |       |       |       |       |       |
| GENE2338X | 16981_s_at | 16981_s_at | 1     | 2.41  | 1.7   | 1.86  | 3.01  | 1.77  | 1.6   |       |       |       |       |
|           | 1.37       | 1.5        | 0.89  | 1.48  | 1.38  | 1.2   | 1.4   | 1.4   | 1.46  | 0.75  | 0.04  | 1.6   |       |
|           | 1.06       | 1.07       | 2.37  | 0.26  | 1.91  | 1.26  | 0.79  | 0.47  | 0.75  | 0.32  | 0.55  | -0.3  | -     |
|           | 0.18       |            |       |       |       |       |       |       |       |       |       |       |       |
| GENE2337X | 13187_i_at | 13187_i_at | 1     | 2.19  | 1.33  | 1.61  | 2.72  | 1.62  | 1.59  |       |       |       |       |
|           | 1.14       | 1.22       | 0.79  | 1.29  | 1.14  | 1.15  | 1.09  | 1.19  | 1.22  | 0.68  | 0.04  | 1.44  |       |





|           |            |            |      |       |      |      |      |       |       |       |       |       |
|-----------|------------|------------|------|-------|------|------|------|-------|-------|-------|-------|-------|
| GENE2388X | 16288_at   | 16288_at   | 1    | 1.82  | 1.47 | 2.25 | 2.15 | 2.08  | 2.34  |       |       |       |
|           | 1.21       | 1.49       | 1.41 | 0.84  | 1.07 | 0.93 | 1.35 | 0.87  | 0.94  | 0.49  | 1.17  | 1.4   |
|           | 2.05       | 0.97       | 0.95 | 1.61  | 0.82 | 0.94 | 0.64 | 1.57  | 0.61  | 0.6   | 0.36  | 0.58  |
|           | 0.26       |            |      |       |      |      |      |       |       |       |       |       |
| GENE2387X | 15993_at   | 15993_at   | 1    | 1.08  | 1.12 | 1.43 | 1.5  | 1.58  | 1.08  |       |       |       |
|           | 1.31       | 0.84       | 0.68 | 0.65  | 0.52 | 0.46 | 0.56 | 0.66  | 0.38  | 0.4   | 0.73  | 0.51  |
|           | 0.93       | 0.43       | 0.63 | 0.71  | 0.73 | 0.82 | 0.43 | 0.76  | 0.82  | 0.55  | 0.42  | 0.37  |
|           | 0.22       |            |      |       |      |      |      |       |       |       |       |       |
| GENE2386X | 15911_at   | 15911_at   | 1    | 1.06  | 1.17 | 1.97 | 1.97 | 2.8   | 2.73  |       |       |       |
|           | 1.62       | 1.7        | 1.68 | 0.85  | 0.87 | 0.67 | 1.02 | 1.15  | 1.12  | 0.81  | 0     | 1.38  |
|           | 1.33       | 0.18       | 0.73 | 2     | 0.75 | 0.33 | 0.17 | 1.2   | 0.79  | 0     | 0.48  | -0.37 |
|           | 0.32       |            |      |       |      |      |      |       |       |       |       |       |
| GENE2385X | 16962_at   | 16962_at   | 1    | 0.43  | 0.6  | 0.85 | 0.66 | 1.08  | 0.84  |       |       |       |
|           | 0.73       | 0.46       | 0.88 | 0.41  | 0.4  | 0.57 | 0.58 | 0.54  | 0.21  | 0.43  | 0.46  | 0.45  |
|           | 0.52       | -0.04      | 0.33 | 0.78  | 0.25 | 0.12 | 0.04 | 0.45  | 0.62  | 0.34  | 0.23  | 0.17  |
|           | 0.09       |            |      |       |      |      |      |       |       |       |       |       |
| GENE2248X | 18873_at   | 18873_at   | 1    | 0.65  | 0.58 | 0.13 | 0.7  | 0.63  | 1.45  |       |       |       |
|           | 0.34       | 0.53       | 0.49 | 0.13  | 0.41 | 0.13 | 0.41 | -0.16 | 0.42  | 0.09  | 0.77  | 0.33  |
|           | 0.54       | 0.65       | 0.7  | 0.52  | 0.6  | 0.49 | 0.46 | 0.18  | 0.61  | 0.73  | 0.51  | 0.18  |
|           | 0.22       |            |      |       |      |      |      |       |       |       |       |       |
| GENE2247X | 14498_at   | 14498_at   | 1    | 1.23  | 0.51 | 0.34 | 0.59 | 0.85  | 1.48  |       |       |       |
|           | 0.72       | 1          | 0.16 | -0.18 | 0.16 | 0.04 | 0.25 | 0.63  | 0.31  | -0.12 | 0.63  | 0.44  |
|           | 1.5        | 0.65       | 0.54 | 0.79  | 0.46 | 0.79 | 0.42 | 0.79  | 0.26  | 0.53  | 0.27  | 0.52  |
|           | 0.25       |            |      |       |      |      |      |       |       |       |       |       |
| GENE2246X | 16992_at   | 16992_at   | 1    | 1.32  | 0.66 | 0.42 | 0.89 | 0.54  | 1.16  |       |       |       |
|           | 0.56       | 0.97       | 0.44 | 0.28  | 0.23 | 0.27 | 0.35 | 0.65  | 0.63  | -0.07 | 0.65  | 0.63  |
|           | 1.22       | 0.73       | 0.55 | 0.67  | 0.81 | 1.03 | 0.71 | 0.49  | 0.15  | 0.35  | 0.37  | 0.18  |
|           | 0.4        |            |      |       |      |      |      |       |       |       |       |       |
| GENE2245X | 15577_s_at | 15577_s_at | 1    | 1.13  | 0.46 | 0.5  | 0.87 | 0.52  | 1.13  |       |       |       |
|           | 0.08       | 0.63       | 0.17 | -0.02 | 0.22 | 0.07 | 0.01 | 0.08  | 0.08  | 0.11  | 0.29  | 0.58  |
|           | 1.11       | 0.33       | 0.55 | 0.62  | 0.36 | 0.37 | 0.23 | 0.29  | 0.4   | 0.33  | 0.26  | 0.02  |
|           | 0.12       |            |      |       |      |      |      |       |       |       |       |       |
| GENE2251X | 14058_at   | 14058_at   | 1    | 0.33  | 0.31 | 0.43 | 0.58 | 0.77  | 1.31  |       |       |       |
|           | 0.02       | 0.44       | 0.47 | 0.65  | 0.89 | 0.29 | 0.31 | 0.5   | 0.72  | 0.07  | 0.01  | 0.54  |
|           | 0.34       | 0.5        | 1    | 0.72  | 0.59 | 0.46 | 0.44 | 0.18  | 0.31  | 0.21  | 0.13  | 0.15  |
| GENE2249X | 18673_at   | 18673_at   | 1    | 0.36  | 0.26 | 0.46 | 0.54 | 0.79  | 1.29  |       |       |       |
|           | 0.08       | 0.4        | 0.73 | 0.34  | 0.46 | 0.23 | 0.22 | 0.16  | 0.42  | 0.16  | 0.42  | 0.37  |
|           | 0.72       | 0.85       | 0.81 | 0.57  | 0.55 | 0.09 | 0.6  | 0.43  | 0.27  | 0.21  | 0.17  | 0.23  |
| GENE1624X | 14686_at   | 14686_at   | 1    | 1.98  | 0.69 | 0.34 | 2.37 | 1.69  | 1.6   |       |       |       |
|           | 0.37       | 0.74       | 1.59 | -0.05 | 1.79 | 0.84 | 0.91 | 0.76  | 0.37  | 1.02  | 1.42  | 1.34  |
|           | 2.07       | 0          | 1.5  | 1.62  | 1.66 | 1.45 | 0.77 | 1.63  | 0.09  | 0.31  | 0.01  | 0.58  |
|           | 0.46       |            |      |       |      |      |      |       |       |       |       |       |
| GENE1623X | 17464_at   | 17464_at   | 1    | 1.14  | 0.85 | 0.63 | 1.96 | 1.12  | 0.75  |       |       |       |
|           | 0.61       | 0.35       | 0.79 | 0.29  | 1.52 | 0.73 | 0.83 | 0.47  | 0.67  | 0.79  | 1.08  | 1.78  |
|           | 1.78       | 0.55       | 1.12 | 1.08  | 1.56 | 1.37 | 0.95 | 1.43  | 0.47  | 0.32  | 0.17  | 0.13  |
|           | 0.13       |            |      |       |      |      |      |       |       |       |       |       |
| GENE1622X | 17507_at   | 17507_at   | 1    | 0.79  | 0.17 | 0.7  | 1.5  | 1.11  | 1.56  |       |       |       |
|           | 0.73       | 0.76       | 1.22 | 0.02  | 1.32 | 0.62 | 0.48 | 0.32  | 0.51  | 0.31  | 0.65  | 1.26  |
|           | 1.17       | 0.37       | 0.4  | 1.13  | 1.57 | 1.44 | 0.66 | 0.66  | -0.13 | 0.07  | -0.21 | 0.07  |
|           | 0.02       |            |      |       |      |      |      |       |       |       |       |       |
| GENE2312X | 17758_at   | 17758_at   | 1    | 5.03  | 3.32 | 1.35 | 2.64 | 2.18  | 3.6   |       |       |       |
|           | 2.73       | 3.3        | 1.2  | -1.69 | -1   | 1.13 | 2.32 | 2.53  | 1.65  | 2.13  | 1.67  | 3.07  |
|           | 4.1        | 1.35       | 2.63 | 2.68  | 1.72 | 2.88 | 1.29 | -1    | 0     | 1.26  | 1.37  | -0.86 |
|           | 0.86       |            |      |       |      |      |      |       |       |       |       |       |
| GENE2305X | 13217_s_at | 13217_s_at | 1    | 3.36  | 2.2  | 0.27 | 3.19 | 1.51  | 1.67  |       |       |       |
|           | 2.96       | 2.27       | 1.15 | -0.05 | 1.41 | 1    | 1.54 | 2.25  | 1.61  | 1.69  | 1.18  | 2.73  |

|           |            |       |      |            |      |      |       |       |       |       |       |       |   |
|-----------|------------|-------|------|------------|------|------|-------|-------|-------|-------|-------|-------|---|
|           | 3.16       | 2.32  | 2.99 | 1.02       | 1.67 | 1.57 | -0.04 | -0.41 | 0.33  | -0.55 | -0.25 | -1.47 | - |
| 0.05      |            |       |      |            |      |      |       |       |       |       |       |       |   |
| GENE2255X | 13789_at   |       |      | 13789_at   |      | 1    | 3.94  | 3.11  | 0.76  | 1.98  | 1.12  | 3.8   |   |
|           | 2.18       | 5     | 0.23 | 0.01       | 0.61 | 2.05 | 2.75  | 2.82  | 2.2   | 1.19  | 1.23  | 2.51  |   |
|           | 2.91       | 2.63  | 1.25 | 0.66       | 0.94 | 1.65 | -0.2  | -0.25 | -0.35 | -0.66 | -0.62 | -0.12 |   |
| 0.77      |            |       |      |            |      |      |       |       |       |       |       |       |   |
| GENE2254X | 19555_at   |       |      | 19555_at   |      | 1    | 3.4   | 3.42  | 0.16  | 1.5   | 0.41  | 2.86  |   |
|           | 2.04       | 3.45  | 0.66 | 0.94       | 0.87 | 2    | 2.15  | 2.45  | 2.2   | 0.8   | 1.39  | 2.84  |   |
|           | 4.51       | 2.76  | 1.18 | 1.02       | 1.66 | 3.43 | 1.41  | -0.73 | 0.12  | -0.47 | 0.23  | 0     |   |
| 1.13      |            |       |      |            |      |      |       |       |       |       |       |       |   |
| GENE2250X | 18660_at   |       |      | 18660_at   |      | 1    | 1.87  | 0.96  | 0.65  | 1     | 0.67  | 3.28  |   |
|           | 0.56       | 2.8   | 1.6  | 0.87       | 1.15 | 0.9  | 1.11  | 1.83  | 2.6   | 0.52  | 1.15  | 2.19  | 3 |
|           | 2.43       | 1.17  | 1.77 | 1.42       | 1.88 | 1.52 | 0.38  | -1    | 0.41  | -0.04 | 1.37  | 1.13  |   |
| GENE1640X | 15859_at   |       |      | 15859_at   |      | 1    | 2.74  | 0.8   | -0.21 | 0.49  | 1.64  | 2.76  |   |
|           | 0.8        | 1.27  | 1.75 | -0.12      | 1.23 | 1.39 | 1.96  | 1.95  | 1.33  | 2.29  | 2.89  | 2.09  |   |
|           | 3.11       | 3.13  | 1.84 | 2.95       | 2.41 | 2.61 | 1.13  | 0.44  | -0.21 | 0.2   | -0.62 | 0     | - |
| 0.15      |            |       |      |            |      |      |       |       |       |       |       |       |   |
| GENE2253X | 14886_at   |       |      | 14886_at   |      | 1    | 0.65  | 0.96  | 0.35  | 0.29  | 1.17  | 1.56  | - |
| 0.15      | 0.56       | 0.72  | 1.18 | 0          | 0.92 | 0.72 | 0.47  | 1.36  | 0.05  | 0.16  | 0.22  | 0.65  |   |
|           | 0.64       | 1.06  | 0.88 | 0.51       | 0.46 | 0.32 | 0.49  | 1     | 1.15  | 0.18  | 0.2   | 0.23  |   |
| GENE2252X | 13386_at   |       |      | 13386_at   |      | 1    | 1.47  | 1.04  | 0.13  | 0.29  | 1.03  | 1.66  | - |
| 0.25      | 0.73       | 0.5   | 1.5  | 0.55       | 1.1  | 0.8  | 0.53  | 0.79  | 0.5   | 0.38  | 0.73  | 1     |   |
|           | 0.32       | 0.29  | 0.38 | 0.16       | 0.69 | 0.53 | 0.36  | 0.54  | 0.13  | 0.04  | 0.41  | 0.88  |   |
| GENE2293X | 18894_at   |       |      | 18894_at   |      | 1    | 1.58  | 0.46  | 0.45  | 1.01  | 0.75  | 0.99  |   |
|           | 0.57       | -0.15 | 1.23 | 0.49       | 1.97 | 1.45 | 1.79  | 1.3   | 0.64  | 1.76  | 1.62  | 1.89  |   |
|           | 1.95       | 0.22  | 1.13 | 1.15       | 0.91 | 1.17 | 0.29  | -0.07 | -0.2  | 0.28  | 0.16  | -0.94 | - |
| 0.15      |            |       |      |            |      |      |       |       |       |       |       |       |   |
| GENE2297X | 16298_at   |       |      | 16298_at   |      | 1    | 4.96  | 4.21  | -0.62 | 5.03  | 3.26  | 3.65  |   |
|           | 3.78       | 5.54  | 3.26 | 1.29       | 3.5  | 4.83 | 5.4   | 5.81  | 2.25  | 2.72  | 2.37  | 4.55  |   |
|           | 4.97       | 3.35  | 4.49 | 1.81       | 3.15 | 3.12 | 0.92  | 1.89  | 0.67  | 0.48  | 0.48  | 0     | 0 |
| GENE2296X | 15775_at   |       |      | 15775_at   |      | 1    | 1.53  | 1.35  | -0.18 | 2     | 2.22  | 3.12  |   |
|           | 1.65       | 2.61  | 2.24 | 1.48       | 2.51 | 2.54 | 2.31  | 2.98  | 1.52  | 2.21  | 1.92  | 2.81  |   |
|           | 3.75       | 2.07  | 2.37 | 2.1        | 2.72 | 2.96 | 1.18  | 0.91  | 0.22  | 0.4   | 0.25  | 0.26  |   |
| 0.31      |            |       |      |            |      |      |       |       |       |       |       |       |   |
| GENE2295X | 13933_at   |       |      | 13933_at   |      | 1    | 1.35  | 0.91  | 0.87  | 1.39  | 0.75  | 1     |   |
|           | 1.52       | 1.66  | 1.35 | 1.19       | 1.77 | 1.47 | 1.53  | 1.77  | 1.55  | 1.32  | 1.56  | 2.03  |   |
|           | 1.41       | 1.83  | 2.4  | 0.71       | 1.84 | 1.36 | 0.2   | 0.01  | 0.26  | 0.2   | 0.5   | -0.26 | - |
| 0.18      |            |       |      |            |      |      |       |       |       |       |       |       |   |
| GENE2294X | 13934_g_at |       |      | 13934_g_at |      | 1    | 0.94  | 0.95  | 0.92  | 1.3   | 0.73  | 0.94  |   |
|           | 1.07       | 1.36  | 1.24 | 1.18       | 1.78 | 1.37 | 1.42  | 1.51  | 1.6   | 1.23  | 1.33  | 1.82  |   |
|           | 1.48       | 1.7   | 2.29 | 0.64       | 1.88 | 1.59 | 0.48  | 0.35  | -0.04 | 0.07  | 0.04  | -0.1  |   |
| 0.02      |            |       |      |            |      |      |       |       |       |       |       |       |   |
| GENE2073X | 15485_at   |       |      | 15485_at   |      | 1    | 2.76  | 1.81  | 1.8   | 3.17  | 1.31  | 1.58  |   |
|           | 1.9        | 3.03  | 1.22 | 1.53       | 2.8  | 2.12 | 2.02  | 2.53  | 1.91  | 1.81  | 1.22  | 2.78  | 1 |
|           | 1.92       | 3.25  | 0.2  | 2.74       | 0.96 | 0.05 | 0.73  | -0.39 | 0.36  | 0.22  | 0.08  | 0.26  |   |
| GENE1884X | 20489_at   |       |      | 20489_at   |      | 1    | 2.37  | 2.67  | 0.35  | 1.93  | 1.13  | 2.13  | 0 |
|           | 1.13       | 3.4   | 1.43 | 2.84       | 2.48 | 2.84 | 3.45  | 2.43  | 2.67  | 1.76  | 3.19  | 1.41  |   |
|           | 3.9        | 5.02  | 0    | 4.24       | 1.76 | 0    | 0     | 0     | 0     | 0.48  | 0     | 0     |   |
| GENE1885X | 13895_at   |       |      | 13895_at   |      | 1    | 1.17  | 1.23  | 0.05  | 1.05  | 1.58  | 1.45  | - |
| 1.43      | -0.45      | 1.95  | 1.8  | 1.81       | 1.94 | 2.14 | 0.26  | 1.88  | 0.87  | 0.76  | 1.6   | 0.32  |   |
|           | 1.46       | 2.66  | 0.45 | 1.48       | 0    | 0.08 | 0.18  | 0.55  | 0     | 0.22  | 0.33  | 0.37  |   |
| GENE1883X | 14544_at   |       |      | 14544_at   |      | 1    | 0.64  | 0.56  | 0.44  | 0.97  | 0.77  | 1     | - |
| 0.35      | -0.02      | 1     | 0.4  | 1.02       | 1.09 | 1.07 | 0.27  | 1.32  | 0.66  | 0.66  | 1.52  | 1.26  |   |
|           | 1.86       | 1.79  | 1.18 | 1.25       | 1.15 | 0.08 | 0.05  | -0.78 | -0.28 | -0.04 | -0.55 | -0.16 |   |
| GENE2175X | 18119_s_at |       |      | 18119_s_at |      | 1    | 0.17  | 1.22  | 1.78  | 2.39  | 1.69  | 1.3   | - |
| 1.12      | -0.25      | 0.6   | -0.3 | 1.32       | 0    | 0.17 | -0.53 | 0.44  | -0.21 | -0.28 | -0.2  | 2.04  | - |
| 0.73      | 0.74       | 1.55  | 0.49 | 0.65       | 0.22 | 0.7  | 0.32  | 0.32  | -0.83 | 1.13  | 0.89  |       |   |



|           |            |            |       |       |       |       |       |       |       |       |       |      |
|-----------|------------|------------|-------|-------|-------|-------|-------|-------|-------|-------|-------|------|
| GENE2174X | 20584_at   | 20584_at   | 1     | 1     | 1.3   | 1.02  | 2.45  | 1.31  | 1.36  | -     |       |      |
| 1.15      | 0.7        | 0.59       | 0.09  | 1.49  | 0.58  | 0.73  | 0.31  | 0.67  | 0.27  | 0.31  | -1.08 | 1.74 |
|           | 0.17       | 0.27       | 0.49  | 0.41  | 0.6   | 0.25  | 0.58  | -0.62 | -0.23 | -0.32 | 1.29  | 1.29 |
| GENE2173X | 12148_at   | 12148_at   | 1     | 0.72  | 0.89  | 0.75  | 0.91  | 1.17  | 0.94  | -     |       |      |
| 0.41      | 0.21       | 0.98       | 0.83  | 1.54  | 0.45  | 0.57  | 0.62  | 0.87  | 1.07  | 0.87  | -0.71 | 0.71 |
| 0.45      | -0.62      | 0.67       | -0.26 | -0.18 | 0.02  | 0.32  | -0.62 | -0.43 | 0.25  | 0.59  | 0.64  |      |
| GENE2172X | 19678_g_at | 19678_g_at | 1     | 0.25  | 1.36  | 0.98  | 0.59  | 1.03  | 0.75  |       |       |      |
| 0.31      | 0.41       | 0.67       | 0.32  | 0.66  | 0.81  | 0.59  | 0.34  | 0.32  | 0.41  | 0.05  | -1.32 |      |
| 0.52      | -0.05      | 0.09       | 0.73  | -0.08 | -0.51 | -0.21 | 0.5   | 0.33  | 0.17  | -0.05 | 0.29  |      |
| 0.22      |            |            |       |       |       |       |       |       |       |       |       |      |
| GENE2171X | 17148_at   | 17148_at   | 1     | 1.21  | 1.58  | 0.42  | 0.77  | 1.31  | 1     | -     |       |      |
| 0.76      | -0.39      | 0.43       | -0.43 | -0.45 | 0.84  | 0.91  | -0.66 | -0.15 | 0.47  | 0.61  | -0.25 | 0.2  |
|           | 0.17       | 0.36       | 1     | 0.42  | 0.52  | 0.48  | 0.34  | 0     | 0.51  | 0.07  | -0.15 | 0.04 |
| GENE2170X | 14459_at   | 14459_at   | 1     | 0.65  | 0.73  | 1.52  | 0.91  | 1.18  | 0.73  |       |       |      |
| 0.53      | 0.32       | 0.28       | 0.51  | -0.23 | 0.16  | 0.5   | -0.59 | 0.89  | 0.15  | 0.6   | -0.07 |      |
| 0.4       | -0.05      | -0.16      | 1.05  | 0.29  | 0.62  | 0.36  | 1.47  | 0.64  | 0.6   | 0.05  | 0.21  | -    |
| 0.12      |            |            |       |       |       |       |       |       |       |       |       |      |
| GENE2169X | 12510_at   | 12510_at   | 1     | 0     | 0.81  | 0.84  | 0.5   | 1.12  | 0.77  |       |       |      |
| 0.22      | -0.1       | 0.25       | 0.32  | 0.09  | 0.64  | 0.78  | -0.23 | 0.8   | 0.05  | 0.23  | 0.08  |      |
| 0.22      | 0.13       | 0.02       | 0.65  | -0.08 | -0.04 | 0.16  | 0.89  | -0.04 | -0.2  | -0.23 | 0.2   |      |
| 0.09      |            |            |       |       |       |       |       |       |       |       |       |      |
| GENE2168X | 14450_at   | 14450_at   | 1     | 0.73  | 0.83  | 1.05  | 0.75  | 1.11  | 1.05  |       |       |      |
| 0.16      | 0.21       | 0.47       | 0.89  | 0.01  | 0.16  | 0.48  | -0.45 | 0.62  | 0.25  | 0.43  | -0.02 | -    |
| 0.68      | 0.31       | 0.07       | 0.25  | -0.13 | -0.02 | 0.05  | 0.23  | -0.25 | 0.26  | 0.07  | 0.31  | 0.4  |
| GENE2167X | 18298_at   | 18298_at   | 1     | 1     | 1.92  | 1.51  | 0.29  | 1     | 0.15  |       |       |      |
| 0.44      | 0.87       | -0.08      | 1.17  | -0.05 | 1.72  | 1.88  | -0.45 | 1.04  | -0.64 | 0.58  | -1.55 | 1    |
| 2.22      | 0.35       | 2.43       | -0.28 | 1.03  | 0.69  | 1.22  | -0.57 | -1.25 | -1.25 | 1.58  | -0.37 |      |
| GENE2166X | 20098_at   | 20098_at   | 1     | 1.24  | 1.45  | 0.73  | -1.51 | 0.52  | 2.32  |       |       |      |
| 0.15      | 2.58       | 1.22       | 1.8   | 0.27  | 0.45  | 0.58  | 0.52  | 0.21  | -0.68 | 1     | 0.18  |      |
| 0.65      | 0.49       | -0.41      | 1.87  | -0.59 | 0.21  | -0.13 | 1.92  | -1.12 | -0.12 | -1.64 | 0.8   |      |
| 0.32      |            |            |       |       |       |       |       |       |       |       |       |      |
| GENE2582X | 13119_at   | 13119_at   | 1     | 1.18  | 0.83  | 1.58  | 0.73  | 0.84  | 1.16  |       |       |      |
| 1.05      | 0.82       | -0.1       | 0.37  | -0.35 | -0.1  | -0.2  | 0.08  | 0.25  | -0.05 | -0.41 | -0.16 |      |
| 0.59      | -0.28      | -0.13      | 0.12  | 0.22  | -0.04 | 0     | 0.41  | 0.77  | 0.16  | -0.59 | 0.67  |      |
| 0.38      |            |            |       |       |       |       |       |       |       |       |       |      |
| GENE2581X | 13205_at   | 13205_at   | 1     | 0.64  | 0.32  | 1.07  | 0.88  | 0.8   | 1.24  |       |       |      |
| 0.87      | 1.13       | 0.31       | 0.28  | -0.16 | -0.13 | -0.12 | 0.57  | 0.59  | -0.1  | -0.08 | 0.05  |      |
| 0.87      | 0.05       | 0.31       | 0.8   | 0.31  | 0.34  | 0.18  | 0.46  | 0.55  | 0.25  | 0.05  | 0.23  | -    |
| 0.05      |            |            |       |       |       |       |       |       |       |       |       |      |
| GENE2580X | 15673_at   | 15673_at   | 1     | 0.61  | 0.26  | 0.86  | 0.94  | 0.63  | 1.19  |       |       |      |
| 1.09      | 1.41       | -0.04      | -0.02 | -0.18 | -0.23 | -0.25 | 0.5   | -0.01 | -0.2  | -0.16 | -0.02 |      |
| 0.86      | -0.07      | 0.07       | 0.48  | -0.05 | -0.04 | -0.13 | 0.55  | 0.54  | 0.2   | 0.17  | 0.2   |      |
| 0.05      |            |            |       |       |       |       |       |       |       |       |       |      |
| GENE2579X | 13670_s_at | 13670_s_at | 1     | 0.6   | 0.29  | 0.61  | 0.73  | 0.63  | 0.4   |       |       |      |
| 1.15      | 0.65       | 0.17       | -0.16 | 0.08  | -0.16 | -0.08 | 0.15  | -0.37 | 0.17  | 0.25  | -0.04 |      |
| 0.18      | -0.15      | 0          | 0.26  | 0.12  | 0.07  | -0.39 | 0.37  | 0.18  | 0.12  | 0.07  | 0.16  |      |
| 0.09      |            |            |       |       |       |       |       |       |       |       |       |      |
| GENE2578X | 12789_at   | 12789_at   | 1     | 0.76  | 0.26  | 0.69  | 0.5   | 0.43  | 0.74  |       |       |      |
| 1.02      | 0.93       | 0          | -0.01 | -0.07 | -0.02 | 0.05  | 0.45  | -0.35 | 0.08  | 0.28  | -0.16 |      |
| 0.37      | 0.16       | 0.05       | 0.33  | 0.2   | 0.22  | 0     | 0.32  | 0.28  | 0.25  | 0.07  | 0.26  |      |
| 0.15      |            |            |       |       |       |       |       |       |       |       |       |      |
| GENE2471X | 13279_at   | 13279_at   | 1     | 4.02  | 3.33  | 4.47  | 5.64  | 3.33  | 4.17  |       |       |      |
| 2.66      | 3.01       | 0.83       | 1.18  | 0.52  | 0.81  | 1.61  | 1.54  | 0.53  | -0.15 | 0.68  | 0.82  |      |
| 2.71      | 0.87       | 1          | 2.25  | 1.07  | 0.88  | -0.49 | 2.5   | 1.59  | 1.23  | 0.28  | 1.12  |      |
| 0.27      |            |            |       |       |       |       |       |       |       |       |       |      |
| GENE2470X | 13163_s_at | 13163_s_at | 1     | 1.29  | 0.8   | 0.99  | 1.65  | 0.81  | 1.57  |       |       |      |
| 1.17      | 1.44       | 0.16       | 0.27  | 0.26  | 0.09  | 0.25  | 0.51  | 0.5   | -0.16 | -0.02 | 0.5   |      |



|           |            |            |      |       |       |       |       |       |       |       |       |       |   |   |
|-----------|------------|------------|------|-------|-------|-------|-------|-------|-------|-------|-------|-------|---|---|
| GENE2655X | 17899_at   | 17899_at   | 1    | 1.52  | 2.93  | 4.05  | 3.61  | 3.07  | 2.24  |       |       |       |   |   |
|           | 3.32       | 2.7        | 1.21 | -1.69 | 0.08  | -0.91 | 0.32  | 0.66  | 0.58  | -1.05 | -0.88 | 0.94  |   |   |
|           | 1.56       | -0.02      | 0.68 | 2.07  | 1.6   | 1.72  | 1.49  | 1.63  | 0.95  | 0.57  | 0.09  | 0.21  | - |   |
|           | 0.12       |            |      |       |       |       |       |       |       |       |       |       |   |   |
| GENE2654X | 14724_f_at | 14724_f_at | 1    | 0.71  | 0.83  | 1.36  | 1.4   | 1.22  | 1.05  |       |       |       |   |   |
|           | 1.02       | 0.72       | 0.25 | -0.32 | 0.13  | 0.02  | 0.08  | -0.01 | -0.07 | 0.12  | -0.04 | 0.29  |   |   |
|           | 0.72       | 0.11       | 0.43 | 0.79  | 0.65  | 0.47  | 0.29  | 0.65  | 0.71  | 0.09  | 0.2   | 0.08  |   |   |
|           | 0.18       |            |      |       |       |       |       |       |       |       |       |       |   |   |
| GENE2550X | 12760_g_at | 12760_g_at | 1    | 2.93  | 2.26  | 3.62  | 4.11  | 3.25  | 1.56  |       |       |       |   |   |
|           | 2.59       | 1.92       | 0.18 | -1.02 | -0.86 | -0.23 | 0.26  | -0.28 | 0.87  | -0.32 | -0.35 | 1.13  |   |   |
|           | 1.66       | 1          | 2.88 | 1.31  | 2.13  | 1.3   | 0.36  | 0.58  | -0.15 | 0.34  | 0.28  | -0.41 | - |   |
|           | 0.39       |            |      |       |       |       |       |       |       |       |       |       |   |   |
| GENE2549X | 12772_at   | 12772_at   | 1    | 2.44  | 2.71  | 3.82  | 4.46  | 3.11  | 1.5   |       |       |       |   |   |
|           | 2.66       | 2.28       | -0.1 | -1.15 | -0.86 | -0.25 | 0.27  | -0.18 | 1.18  | -0.71 | -1.18 | 1.12  |   |   |
|           | 1.83       | 0.82       | 2.8  | 1.14  | 2.28  | 1.29  | 0.4   | 0.86  | -0.02 | 0.33  | 0.09  | -0.43 | - |   |
|           | 0.41       |            |      |       |       |       |       |       |       |       |       |       |   |   |
| GENE2548X | 13687_s_at | 13687_s_at | 1    | 0.87  | 1.72  | 2.09  | 2.01  | 1.7   | 1.06  |       |       |       |   |   |
|           | 1.6        | 1.03       | 0.23 | -1.25 | -0.26 | -0.78 | -0.28 | -0.13 | 0.23  | -0.51 | -0.49 | 0.18  |   |   |
|           | 0.73       | 0.83       | 1.23 | 0.54  | 1.15  | 0.67  | 0.26  | 0.42  | 0     | -0.08 | -0.62 | -0.13 | - |   |
|           | 0.13       |            |      |       |       |       |       |       |       |       |       |       |   |   |
| GENE2547X | 17533_s_at | 17533_s_at | 1    | 3.29  | 5.24  | 6.58  | 7.49  | 5.88  | 2.92  |       |       |       |   |   |
|           | 5.49       | 1.77       | 0.26 | -0.86 | 0     | 0     | 2.32  | -0.49 | -0.86 | -1.28 | -1.28 | 1.84  |   |   |
|           | 4.78       | 4.27       | 6.52 | 4.18  | 3.21  | 2.42  | 0.65  | 0.67  | 0.67  | 1.13  | 0     | -1.12 | - |   |
|           | 0.45       |            |      |       |       |       |       |       |       |       |       |       |   |   |
| GENE2544X | 16387_at   | 16387_at   | 1    | 2.07  | 1.92  | 3.98  | 3.32  | 3.58  | 2.26  |       |       |       |   |   |
|           | 3.43       | 1.76       | 0    | 0     | 0     | 0     | 0     | 0     | 0     | 0     | 0     | 0     | 0 | 0 |
|           | 3.43       | 3.13       | 1.58 | 3.56  | 3.07  | 2.32  | 0     | 0     | 0     | 0     | 0     | 0     |   |   |
| GENE2542X | 20463_s_at | 20463_s_at | 1    | 1.29  | 1.64  | 2.12  | 2.03  | 2.16  | 1.4   |       |       |       |   |   |
|           | 2.09       | 0.83       | 0.4  | -0.86 | -0.66 | -0.59 | 0     | -0.53 | 0.29  | -0.49 | -0.59 | 0.25  |   |   |
|           | 0.73       | 1.65       | 1.41 | 0.88  | 2.24  | 1.79  | 1.39  | 0.13  | -0.86 | -0.23 | -0.26 | -0.35 | - |   |
|           | 0.45       |            |      |       |       |       |       |       |       |       |       |       |   |   |
| GENE2541X | 16989_at   | 16989_at   | 1    | 1.22  | 1.57  | 2.74  | 1.75  | 1.87  | 0.41  |       |       |       |   |   |
|           | 1.85       | 0.34       | 1.22 | 0     | -0.53 | -0.26 | -0.04 | 0.17  | 0.72  | -1.47 | 0     | 0.42  | 0 | 0 |
|           | 1.17       | 1.55       | 1.15 | 1.33  | 1.13  | 0.52  | -0.26 | 0.28  | 0.76  | 0.79  | 0.26  | 0.22  |   |   |
| GENE2503X | 20685_at   | 20685_at   | 1    | 2.93  | 2.51  | 3.45  | 5.08  | 2.86  | 2.04  |       |       |       |   |   |
|           | 1.9        | 1.32       | 0.78 | -0.05 | 1.58  | -0.05 | 0.36  | 0.5   | 1.26  | -0.68 | -0.68 | 1.91  |   |   |
|           | 3.55       | 1.33       | 1.58 | 1.7   | 2.04  | 1.36  | 1.29  | 0.46  | 1.18  | 0.29  | 0.88  | 0.32  |   |   |
|           | 0.04       |            |      |       |       |       |       |       |       |       |       |       |   |   |
| GENE2502X | 16968_at   | 16968_at   | 1    | 3.57  | 3.83  | 6.33  | 5.89  | 3.85  | 3.55  |       |       |       |   |   |
|           | 1.98       | 2.28       | 1.44 | 2.07  | 1.17  | 0.07  | 0.07  | 0.35  | 3.98  | -1.39 | -0.71 | 2.39  |   |   |
|           | 4.54       | 0.81       | 2.8  | 3.09  | 3.38  | 2.94  | 2.89  | 1.83  | 1.67  | 1     | 1.84  | 0     |   |   |
|           | 0.29       |            |      |       |       |       |       |       |       |       |       |       |   |   |
| GENE2501X | 15216_at   | 15216_at   | 1    | 1.72  | 1.56  | 3.1   | 3.19  | 1.8   | 1.59  |       |       |       |   |   |
|           | 1.76       | 1.69       | 0.82 | 0.07  | 0.4   | 0.07  | 0.16  | 0.76  | 1.06  | -0.34 | -0.18 | 1.29  |   |   |
|           | 2.08       | 0.42       | 0.88 | 1.3   | 1.69  | 1.83  | 1.7   | 1.21  | 0.91  | 0.83  | 0.57  | 0.46  | - |   |
|           | 0.04       |            |      |       |       |       |       |       |       |       |       |       |   |   |
| GENE2493X | 13115_at   | 13115_at   | 1    | 3.24  | 3.45  | 3.88  | 5.17  | 4.01  | 2.54  |       |       |       |   |   |
|           | 2.3        | 2.16       | 1.87 | -0.35 | 0.83  | 0.55  | 1.09  | 0.44  | 1.47  | 0.12  | 0.02  | 2.59  |   |   |
|           | 3.08       | 1.43       | 3.33 | 3.45  | 3.17  | 2.74  | 1.71  | 2.67  | 1.98  | 1.63  | 1.56  | 0.08  | - |   |
|           | 0.07       |            |      |       |       |       |       |       |       |       |       |       |   |   |
| GENE2492X | 20051_at   | 20051_at   | 1    | 2.58  | 2.28  | 2.84  | 4.53  | 3.67  | 2.67  |       |       |       |   |   |
|           | 2.83       | 2.47       | 1.02 | -0.47 | 0.54  | -0.05 | 0.48  | 0.69  | 0.89  | -0.41 | 0.12  | 2.13  |   |   |
|           | 2.52       | 1.76       | 2.81 | 2.14  | 2.42  | 1.89  | 0.92  | 1.43  | 0.84  | 0.58  | 0.43  | 0.35  | - |   |
|           | 0.35       |            |      |       |       |       |       |       |       |       |       |       |   |   |
| GENE2491X | 16391_at   | 16391_at   | 1    | 2.18  | 0.87  | 3.23  | 3.65  | 2.42  | 2.1   |       |       |       |   |   |
|           | 2.71       | 2          | 0.44 | -0.86 | -0.23 | 0.21  | 0.65  | 0.43  | 1.35  | -0.83 | 0.16  | 1.71  |   |   |

|           |            |      |            |       |       |       |       |      |       |       |       |       |   |
|-----------|------------|------|------------|-------|-------|-------|-------|------|-------|-------|-------|-------|---|
|           | 2.71       | 1    | 2.65       | 2.12  | 2.51  | 1.92  | 1.32  | 1.32 | 1.58  | 1.18  | 0.5   | -0.39 | - |
| 0.23      |            |      |            |       |       |       |       |      |       |       |       |       |   |
| GENE2500X | 14959_at   |      | 14959_at   |       | 1     | 2.7   | 3.39  | 4.18 | 3.88  | 2.32  | 2.3   |       |   |
|           | 2.68       | 2.4  | 0.58       | 0     | 0.26  | 0.41  | 1     | 1.15 | 1.87  | 0.45  | 1     | 1.48  |   |
|           | 1.48       | 1.52 | 2.37       | 1.29  | 2.24  | 2.17  | 2.04  | 1.89 | 1.58  | 1.48  | 1.26  | 1.08  |   |
|           | 1.08       |      |            |       |       |       |       |      |       |       |       |       |   |
| GENE2499X | 15978_at   |      | 15978_at   |       | 1     | 2.31  | 2.7   | 2.76 | 3.77  | 2.86  | 2.19  |       |   |
|           | 3.24       | 2.54 | 0.63       | 0     | 0.68  | 0.53  | 0.77  | 1.18 | 0.91  | -0.02 | -0.39 | 1.56  |   |
|           | 1.91       | 0.77 | 1.57       | 1.96  | 2.29  | 1.75  | 1.21  | 1.21 | 1.16  | 0.89  | 0.68  | 0.62  |   |
|           | 0.54       |      |            |       |       |       |       |      |       |       |       |       |   |
| GENE2498X | 15551_at   |      | 15551_at   |       | 1     | 2.43  | 1.9   | 2.07 | 2.52  | 1.72  | 1.67  |       |   |
|           | 1.93       | 1.93 | 0.52       | 0     | 0.55  | 0.6   | 0.69  | 0.91 | 0.88  | 0.56  | 0.74  | 1.05  |   |
|           | 1.95       | 0.44 | 1.24       | 1.32  | 1.37  | 1.25  | 0.98  | 0.91 | 0.62  | 0.62  | 0.45  | 0.28  |   |
|           | 0.32       |      |            |       |       |       |       |      |       |       |       |       |   |
| GENE2497X | 17900_s_at |      | 17900_s_at |       | 1     | 1.41  | 1.37  | 2.37 | 2.17  | 1.22  | 1.23  |       |   |
|           | 1.5        | 1.91 | 0.01       | 0.04  | -0.15 | -0.34 | 0.22  | 0.63 | 1.01  | -0.59 | -0.25 | 0.79  |   |
|           | 1.56       | 1.13 | 1.53       | 0.91  | 1.67  | 1.28  | 0.77  | 0.87 | 0.42  | 0.13  | 0.01  | 0.25  |   |
|           | 0.08       |      |            |       |       |       |       |      |       |       |       |       |   |
| GENE2496X | 15617_s_at |      | 15617_s_at |       | 1     | 1.51  | 1.35  | 1.59 | 2.12  | 1.26  | 1.73  |       |   |
|           | 1.18       | 1.54 | 0.18       | 0.07  | 0.02  | 0.25  | 0.27  | 0.49 | 0.66  | -0.08 | 0.04  | 0.91  |   |
|           | 1.31       | 0.92 | 1.06       | 1.02  | 1.2   | 0.94  | 0.61  | 0.4  | 0.47  | 0.18  | 0.2   | 0.15  |   |
|           | 0.2        |      |            |       |       |       |       |      |       |       |       |       |   |
| GENE2495X | 16940_g_at |      | 16940_g_at |       | 1     | 1.43  | 1.13  | 1.54 | 1.68  | 0.97  | 1.55  |       |   |
|           | 1.15       | 1.5  | -0.05      | 0.05  | -0.12 | 0.05  | 0.2   | 0.29 | 0.52  | -0.13 | 0.34  | 0.7   |   |
|           | 1.22       | 1.22 | 1.2        | 0.77  | 1.2   | 0.94  | 0.51  | 0.45 | 0.53  | 0.25  | 0.25  | 0     | 0 |
| GENE2494X | 13116_at   |      | 13116_at   |       | 1     | 1.08  | 1.04  | 1.53 | 1.34  | 0.64  | 0.94  |       |   |
|           | 1.02       | 1.18 | -0.13      | 0     | -0.18 | 0.05  | 0.08  | 0.01 | 0.35  | -0.18 | -0.01 | 0.21  |   |
|           | 0.94       | 0.43 | 0.53       | 0.44  | 0.64  | 0.55  | 0.45  | 0.48 | 0.66  | 0.26  | 0.13  | 0.12  |   |
|           | 0.13       |      |            |       |       |       |       |      |       |       |       |       |   |
| GENE2530X | 17702_at   |      | 17702_at   |       | 1     | 2.32  | 1.78  | 1.56 | 2.43  | 2.11  | 1.45  |       |   |
|           | 0.55       | 1.37 | 0.32       | 0.41  | 0.73  | 0.26  | 0.48  | 0.47 | 0.46  | 0.07  | 0.13  | 0.61  |   |
|           | 1.92       | 1.28 | 2.17       | 1.05  | 1.94  | 1.77  | 0.18  | 0.54 | 0.17  | 0.33  | -0.13 | 0.13  |   |
|           | 0.02       |      |            |       |       |       |       |      |       |       |       |       |   |
| GENE2529X | 13246_at   |      | 13246_at   |       | 1     | 2.76  | 1.58  | 1.11 | 2.72  | 1.83  | 1.53  |       |   |
|           | 1.55       | 2    | 0.5        | 0.51  | 0.68  | 0.74  | 0.8   | 1    | 1.22  | 0.02  | 0     | 0.71  |   |
|           | 1.62       | 1.07 | 2.19       | 1.02  | 2.08  | 1.63  | -0.15 | 0.42 | 0.47  | 0.29  | 0.42  | -0.1  | - |
| 0.25      |            |      |            |       |       |       |       |      |       |       |       |       |   |
| GENE2531X | 16370_s_at |      | 16370_s_at |       | 1     | 3.53  | 1.84  | 3.51 | 3.84  | 3.88  | 3.13  |       |   |
|           | 3.84       | 3.29 | 0          | 0     | 0     | 0     | 0     | 0.67 | 1.37  | 0     | 0     | 1.37  |   |
|           | 3.82       | 0.84 | 3.58       | 4.21  | 3.43  | 3.72  | 0.48  | 0    | 0     | 0     | 0     | 0     | 0 |
| GENE2445X | 16817_s_at |      | 16817_s_at |       | 1     | 2.96  | 0.74  | 3.46 | 4.14  | 2.56  | 2.06  |       |   |
|           | 2.85       | 3.15 | 0.26       | -0.64 | 0.07  | 0.31  | 1     | 0.84 | 1.55  | -0.43 | 0.35  | 2.3   |   |
|           | 2.64       | 2.56 | 3.63       | 2     | 3.53  | 3.49  | 1.74  | 1.45 | 0.07  | 0.22  | -0.16 | -0.62 | - |
| 0.3       |            |      |            |       |       |       |       |      |       |       |       |       |   |
| GENE2444X | 19991_at   |      | 19991_at   |       | 1     | 5.32  | 4.11  | 3.51 | 5.43  | 3.21  | 3.86  | 4     |   |
|           | 4.25       | 0.32 | -1.25      | -0.18 | 0.07  | 1.4   | 1.17  | 0.93 | -0.1  | 1.47  | 2.63  | 4.29  |   |
|           | 3.91       | 5.16 | 2.59       | 4.99  | 4.19  | 2.33  | 2.3   | 1.77 | 0.76  | 0.29  | 0.46  | 0.29  |   |
| GENE2443X | 17252_at   |      | 17252_at   |       | 1     | 1.52  | 1.12  | 1.22 | 1.63  | 1.18  | 1.21  |       |   |
|           | 1.11       | 1    | 0          | -0.1  | 0.05  | -0.04 | 0.23  | 0.07 | 0.52  | -0.12 | 0.23  | 0.93  |   |
|           | 1.76       | 1.25 | 1.28       | 1.27  | 1.56  | 1.51  | 0.97  | 0.91 | 0.28  | 0.27  | 0.01  | 0.18  | - |
| 0.1       |            |      |            |       |       |       |       |      |       |       |       |       |   |
| GENE2446X | 18662_s_at |      | 18662_s_at |       | 1     | 2.45  | 1.6   | 2.16 | 2.93  | 2.27  | 2.63  |       |   |
|           | 1.69       | 2.18 | 0.69       | -0.45 | 0.48  | 0.36  | 0.93  | 0.58 | 0.83  | 0.18  | 0.76  | 1.55  |   |
|           | 2.72       | 2.38 | 2.61       | 2.11  | 2.91  | 2.76  | 1.32  | 0.33 | -0.37 | 0.05  | -0.18 | -0.15 | - |
| 0.13      |            |      |            |       |       |       |       |      |       |       |       |       |   |
| GENE1675X | 15341_at   |      | 15341_at   |       | 1     | 2.49  | 2.36  | 2.3  | 3.05  | 2.52  | 2.77  |       |   |
|           | 2.18       | 2.95 | 0.32       | -0.53 | -0.43 | -0.3  | 0.84  | 0.45 | 1.2   | -0.32 | 0.41  | 1.17  |   |



|           |            |            |       |       |       |       |       |       |       |       |       |       |   |
|-----------|------------|------------|-------|-------|-------|-------|-------|-------|-------|-------|-------|-------|---|
| GENE2532X | 13040_at   | 13040_at   | 1     | 1.33  | 1.34  | 1.66  | 1.86  | 1.06  | 0.67  |       |       |       |   |
|           | 0.53       | 0.05       | -0.25 | 0.41  | 0     | 0.25  | 0.28  | -0.64 | 0.58  | -0.05 | 0.21  | 0     |   |
|           | 0.52       | 0.28       | 0.74  | 0.47  | 0.61  | 0.29  | 0.37  | 0.37  | -0.47 | 0.11  | 0     | 0     | 0 |
| GENE2553X | 15675_s_at | 15675_s_at | 1     | 1.13  | 1.92  | 2.43  | 2.8   | 4.12  | 1.67  |       |       |       |   |
|           | 2.72       | 0.67       | 1.13  | 0     | 0     | 0     | 0     | 1     | 0     | 0     | 1     |       |   |
|           | 0.48       | 0.67       | 2.2   | 1.13  | 2.37  | 0.67  | 0     | 0     | 0     | 0     | 0     | 0     | 0 |
| GENE2552X | 15924_at   | 15924_at   | 1     | 2.07  | 2.13  | 1.86  | 2.41  | 2.37  | 2.38  |       |       |       |   |
|           | 1.7        | 1.37       | 0.22  | 0.12  | 0.15  | 0.18  | 0.25  | 0.5   | 1.26  | -0.13 | -0.34 | 0.82  |   |
|           | 1.28       | 0.63       | 1.36  | 1.51  | 1.09  | 0.12  | 0.25  | 0.61  | 0.71  | 0.09  | 0.27  | 0.15  |   |
|           | 0.63       |            |       |       |       |       |       |       |       |       |       |       |   |
| GENE2551X | 16537_s_at | 16537_s_at | 1     | 1.23  | 1.51  | 1.1   | 2.05  | 2.01  | 1.75  |       |       |       |   |
|           | 1.39       | 1.2        | 0.41  | -0.25 | 0.15  | 0.32  | 0.13  | 0.72  | 0.37  | -0.41 | -0.68 | 0.36  |   |
|           | 0.45       | 0.56       | 1.33  | 1.06  | 1.22  | 0.45  | 0.45  | 0.23  | 0.72  | 0.37  | 0.2   | 0.16  |   |
|           | 0.68       |            |       |       |       |       |       |       |       |       |       |       |   |
| GENE2539X | 14083_at   | 14083_at   | 1     | 3     | 2.5   | 2.46  | 3.42  | 2.77  | 2.58  |       |       |       |   |
|           | 2.4        | 2.37       | 0.22  | -0.71 | -0.08 | -0.28 | 0.89  | 0     | 1.08  | -0.47 | -0.3  | 1.3   |   |
|           | 1.55       | 1.4        | 1.66  | 1.46  | 2.17  | 1.81  | 0.36  | 0.77  | -0.28 | -0.34 | -0.47 | 0     | - |
|           | 0.25       |            |       |       |       |       |       |       |       |       |       |       |   |
| GENE2538X | 19411_at   | 19411_at   | 1     | 2.83  | 1.79  | 2.51  | 3.03  | 2.45  | 2.38  |       |       |       |   |
|           | 2.26       | 2.21       | 0.57  | -0.28 | 0.13  | -0.39 | 0.04  | 0.68  | 0.9   | -0.26 | 0.5   | 1.03  |   |
|           | 2.02       | 1.49       | 1.39  | 0.75  | 1.22  | 0.62  | 0.34  | 0     | -0.59 | -0.28 | -0.28 | 0.31  |   |
|           | 0.21       |            |       |       |       |       |       |       |       |       |       |       |   |
| GENE2537X | 15091_at   | 15091_at   | 1     | 2.36  | 2.06  | 2.15  | 2.59  | 1.37  | 1.78  |       |       |       |   |
|           | 1.59       | 1.7        | -0.34 | -0.55 | -0.13 | 0.04  | 0.25  | -0.15 | 0.55  | 0.08  | 0.47  | 0.62  |   |
|           | 1.17       | 1.22       | 1.47  | 0.21  | 1.22  | 1.08  | -0.01 | 0.02  | 0.59  | 0.12  | 0.04  | 0.23  |   |
|           | 0.27       |            |       |       |       |       |       |       |       |       |       |       |   |
| GENE2466X | 17392_at   | 17392_at   | 1     | 2.55  | 2.36  | 1.81  | 2.58  | 2.91  | 1.45  |       |       |       |   |
|           | 2.93       | 2.65       | 0.28  | -1.21 | -0.73 | -0.49 | 0.16  | 0.44  | 0.42  | 0.22  | 0.38  | 1.45  |   |
|           | 1.91       | 1.97       | 2.37  | 1.13  | 2.5   | 1.78  | 0.87  | 0.87  | 0.65  | 0.47  | 0.16  | 0.95  |   |
|           | 0.41       |            |       |       |       |       |       |       |       |       |       |       |   |
| GENE2465X | 15672_s_at | 15672_s_at | 1     | 2.77  | 3.19  | 3.61  | 4.67  | 3.21  | 3.27  |       |       |       |   |
|           | 3.4        | 3.48       | 0.35  | -0.73 | -0.39 | -0.3  | 1.03  | 1.1   | 1.84  | -0.94 | -0.3  | 2.3   |   |
|           | 2.29       | 2.73       | 2.97  | 1.1   | 2.98  | 2.72  | 1.34  | 0.66  | 1.19  | 0.55  | 0.7   | 0.12  |   |
|           | 0.51       |            |       |       |       |       |       |       |       |       |       |       |   |
| GENE2464X | 20689_at   | 20689_at   | 1     | 1.59  | 2.05  | 2.12  | 2.23  | 1.7   | 2.15  |       |       |       |   |
|           | 1.75       | 1.93       | 0.18  | 0.04  | -0.3  | 0.04  | 0.94  | 0.73  | 1.49  | -0.49 | -0.32 | 1.54  |   |
|           | 1.74       | 2.79       | 2.37  | 0.77  | 1.96  | 1.56  | 0.85  | 0.44  | 1.02  | 0.07  | 0.05  | 0.29  |   |
|           | 0.27       |            |       |       |       |       |       |       |       |       |       |       |   |
| GENE2463X | 15392_at   | 15392_at   | 1     | 1.86  | 2.5   | 3.23  | 3.13  | 2     | 1.3   |       |       |       |   |
|           | 2.52       | 2.23       | -0.15 | -0.49 | 0.13  | -0.39 | 0.68  | 0.12  | 1.37  | -0.45 | -0.08 | 1.64  |   |
|           | 2.23       | 2.41       | 2.86  | 0.46  | 1.86  | 1.41  | 0.23  | 0.45  | 0.69  | 0.34  | 0.32  | -0.07 |   |
|           | 0.07       |            |       |       |       |       |       |       |       |       |       |       |   |
| GENE2462X | 12892_g_at | 12892_g_at | 1     | 3.15  | 2.94  | 3.05  | 3.94  | 1.93  | 1.58  |       |       |       |   |
|           | 2.49       | 2.53       | -0.53 | -0.97 | 0.02  | 0.15  | 0.54  | 0.45  | 1.43  | 0.08  | -0.07 | 2.19  |   |
|           | 2.72       | 1.83       | 3.56  | 1.54  | 3.1   | 2.68  | 0.91  | 0.94  | 0.54  | 0.65  | 0.21  | -0.18 |   |
|           | 0.02       |            |       |       |       |       |       |       |       |       |       |       |   |
| GENE2461X | 12891_at   | 12891_at   | 1     | 2.72  | 2.98  | 2.87  | 3.8   | 1.82  | 1.48  |       |       |       |   |
|           | 2.25       | 2.3        | -0.49 | -0.76 | 0.08  | 0.42  | 0.63  | 0.4   | 1.4   | -0.12 | -0.12 | 2.26  |   |
|           | 2.52       | 1.8        | 3.07  | 1.5   | 2.99  | 2.52  | 0.91  | 0.72  | 0.27  | 0.34  | -0.05 | -0.1  |   |
|           | 0.02       |            |       |       |       |       |       |       |       |       |       |       |   |
| GENE2456X | 16638_at   | 16638_at   | 1     | 4.92  | 4.9   | 4.41  | 5.91  | 4.82  | 5.02  |       |       |       |   |
|           | 4.6        | 4.59       | 1.73  | 0.07  | 0.43  | 1.18  | 2.79  | 2.14  | 2.86  | -0.18 | 1.1   | 3.18  |   |
|           | 3.82       | 2.46       | 3.72  | 2.73  | 3.68  | 2.95  | 1.52  | 1.34  | 0.12  | 0.55  | 0.35  | 0.43  |   |
|           | 0.48       |            |       |       |       |       |       |       |       |       |       |       |   |
| GENE2455X | 13645_at   | 13645_at   | 1     | 4.1   | 4.46  | 4.79  | 5.64  | 4.07  | 3.98  |       |       |       |   |
|           | 4.71       | 4.49       | 0.86  | 0.09  | 0.58  | 0.62  | 1.56  | 1.73  | 2.23  | -0.32 | -0.57 | 2.5   |   |







|           |            |            |      |       |       |       |      |       |       |       |       |       |   |  |  |  |
|-----------|------------|------------|------|-------|-------|-------|------|-------|-------|-------|-------|-------|---|--|--|--|
| GENE2509X | 20258_at   | 20258_at   | 1    | 1.96  | 1.88  | 2.83  | 3.3  | 3.02  | 2.11  |       |       |       |   |  |  |  |
|           | 1.4        | 1.15       | 0.78 | 0.6   | 0.61  | 0.54  | 0.54 | 0.47  | 1.51  | 0.41  | -0.71 | 1.17  |   |  |  |  |
|           | 1.29       | 1.8        | 2.04 | 1.41  | 2.06  | 1.79  | 1.36 | 0.73  | 0.48  | 0.74  | 0.67  | 0.68  |   |  |  |  |
|           | 0.68       |            |      |       |       |       |      |       |       |       |       |       |   |  |  |  |
| GENE2508X | 14646_s_at | 14646_s_at | 1    | 1.23  | 1.03  | 1.17  | 1.5  | 1.26  | 1.86  |       |       |       |   |  |  |  |
|           | 0.79       | 0.73       | 0.79 | 0.36  | 0.52  | 0.34  | 0.37 | 0.22  | 0.62  | 0.35  | 0.47  | 0.32  |   |  |  |  |
|           | 0.65       | 0.88       | 1.4  | 1.27  | 0.48  | 0.87  | 0.7  | 0.46  | 0.44  | 0.25  | 0.34  | 0.21  |   |  |  |  |
|           | 0.21       |            |      |       |       |       |      |       |       |       |       |       |   |  |  |  |
| GENE2656X | 14786_at   | 14786_at   | 1    | 2.4   | 2.82  | 4.73  | 3.35 | 3.79  | 2.68  |       |       |       |   |  |  |  |
|           | 2.55       | 1.71       | 1.11 | 0     | -0.66 | -0.53 | 1.2  | -0.18 | 1.32  | -0.3  | -0.83 | 0.28  | 1 |  |  |  |
|           | 1.42       | 2.45       | 2.29 | 2.1   | 1.88  | 0.94  | 2.55 | 1.09  | 0.83  | 0.58  | 0.67  | 0     |   |  |  |  |
| GENE2527X | 20285_s_at | 20285_s_at | 1    | 1.65  | 1.64  | 2.78  | 2.83 | 2.07  | 0.88  |       |       |       |   |  |  |  |
|           | 1.35       | 0.85       | 0.32 | 0.11  | 0.35  | 0.02  | 0.36 | 0     | 0.41  | 0.02  | 0.18  | 0.79  |   |  |  |  |
|           | 2.2        | 1.28       | 2.01 | 1.72  | 1.9   | 1.88  | 1.2  | 1.64  | 0.85  | 0.53  | 0.4   | 0.27  | - |  |  |  |
|           | 0.01       |            |      |       |       |       |      |       |       |       |       |       |   |  |  |  |
| GENE2526X | 13078_at   | 13078_at   | 1    | 1.1   | 1.41  | 1.29  | 1.7  | 1.4   | 0.59  |       |       |       |   |  |  |  |
|           | 0.84       | 0.38       | 0.18 | -0.25 | -0.01 | 0.21  | 0.26 | -0.1  | 0.5   | 0.18  | 0.29  | 0.53  |   |  |  |  |
|           | 0.84       | 0.48       | 0.7  | 0.85  | 1.22  | 1.07  | 0.79 | 0.79  | 0.58  | 0.32  | 0.18  | 0.25  | - |  |  |  |
|           | 0.02       |            |      |       |       |       |      |       |       |       |       |       |   |  |  |  |
| GENE2515X | 12115_at   | 12115_at   | 1    | 2.33  | 3.62  | 4.21  | 5.55 | 4.13  | 2.16  |       |       |       |   |  |  |  |
|           | 3.68       | 1.09       | 2.43 | -0.57 | 2.03  | 0.73  | 1.56 | 0.73  | 0.77  | 0.23  | 1.17  | 2.84  |   |  |  |  |
|           | 3.35       | 1.23       | 1.68 | 3.23  | 2.65  | 2.46  | 2.31 | 3.63  | 0.59  | 1.4   | 0.66  | 0.78  |   |  |  |  |
|           | 0.42       |            |      |       |       |       |      |       |       |       |       |       |   |  |  |  |
| GENE2514X | 15181_at   | 15181_at   | 1    | 1.15  | 1.33  | 1.99  | 2.07 | 2.19  | 1.54  |       |       |       |   |  |  |  |
|           | 2.26       | 1.33       | 1.51 | -0.23 | 0.4   | -0.3  | 0.31 | 0.93  | 0.04  | 0.22  | 0.05  | 1.08  |   |  |  |  |
|           | 1.84       | 0.5        | 1.06 | 2.02  | 1.65  | 1.23  | 1.14 | 1.65  | 0.96  | 0.87  | 0.71  | 0.55  |   |  |  |  |
|           | 0.07       |            |      |       |       |       |      |       |       |       |       |       |   |  |  |  |
| GENE2513X | 14057_at   | 14057_at   | 1    | 0.82  | 0.77  | 1     | 1.07 | 1.21  | 0.93  |       |       |       |   |  |  |  |
|           | 0.97       | 0.65       | 0.5  | -0.16 | 0.17  | -0.02 | 0.11 | 0.28  | -0.05 | -0.04 | 0.28  | 0.5   |   |  |  |  |
|           | 0.88       | 0.48       | 0.4  | 1.26  | 0.8   | 0.77  | 0.65 | 0.54  | 0.47  | 0.35  | 0.28  | 0.29  |   |  |  |  |
|           | 0.15       |            |      |       |       |       |      |       |       |       |       |       |   |  |  |  |
| GENE2528X | 13685_at   | 13685_at   | 1    | 2.11  | 2.9   | 2.36  | 3.34 | 3.48  | 2.59  |       |       |       |   |  |  |  |
|           | 2.1        | 1.51       | 1.26 | -0.43 | -0.18 | 1.2   | 1.42 | 0.22  | 0.26  | -0.3  | -0.23 | 1.07  |   |  |  |  |
|           | 2.55       | 1.85       | 3.48 | 3.47  | 3.42  | 2.23  | 1.46 | 1.89  | 1.49  | 0.76  | 0.6   | 0.87  |   |  |  |  |
|           | 0.41       |            |      |       |       |       |      |       |       |       |       |       |   |  |  |  |
| GENE1798X | 17748_at   | 17748_at   | 1    | 1.22  | 3.08  | 3.26  | 3.43 | 3.98  | 3.03  |       |       |       |   |  |  |  |
|           | 1.94       | 1.58       | 1.92 | -0.68 | 0.84  | 1.41  | 1.66 | -0.16 | -0.68 | -0.13 | 0.49  | 1     |   |  |  |  |
|           | 2.48       | 1.02       | 2    | 3.72  | 3.39  | 3.37  | 2.7  | 1.22  | 1.78  | 1.49  | 1.58  | 0.5   | - |  |  |  |
|           | 0.26       |            |      |       |       |       |      |       |       |       |       |       |   |  |  |  |
| GENE2380X | 16747_at   | 16747_at   | 1    | 4.29  | 2.88  | 3.38  | 5.52 | 5.66  | 3.94  |       |       |       |   |  |  |  |
|           | 2.88       | 2.71       | 2.92 | 0.84  | 1.58  | 1.53  | 1.88 | 2.14  | 1.3   | 1.17  | 0.45  | 2.37  |   |  |  |  |
|           | 2.32       | 0.28       | 2.05 | 3.2   | 2.48  | 2.32  | 1.2  | 2.88  | 0.65  | 0.73  | 0.32  | -0.68 | - |  |  |  |
|           | 0.41       |            |      |       |       |       |      |       |       |       |       |       |   |  |  |  |
| GENE2379X | 19640_at   | 19640_at   | 1    | 4.1   | 4.09  | 2.6   | 6.6  | 5.03  | 4.21  |       |       |       |   |  |  |  |
|           | 4.09       | 4.15       | 2.51 | 0.49  | 2.91  | 2.81  | 3.06 | 3.19  | 1.79  | 0.92  | 0.78  | 4.17  |   |  |  |  |
|           | 3.36       | 0.41       | 3.15 | 2.4   | 3.9   | 2.86  | 1.98 | 2.32  | 1.18  | 1.05  | 0.65  | 0.05  |   |  |  |  |
|           | 0.12       |            |      |       |       |       |      |       |       |       |       |       |   |  |  |  |
| GENE2378X | 16203_at   | 16203_at   | 1    | 3     | 4.09  | 3.69  | 5.83 | 5.48  | 4.58  |       |       |       |   |  |  |  |
|           | 3.81       | 3.73       | 2.13 | 0.78  | 1.93  | 1.87  | 2.15 | 1.77  | 2.84  | 0.11  | -2.32 | 2.66  |   |  |  |  |
|           | 3.43       | 0.81       | 2.05 | 2.67  | 3.03  | 0.48  | 1.92 | 1.13  | 0.34  | 0.68  | 0.63  | 0.15  |   |  |  |  |
|           | 0.6        |            |      |       |       |       |      |       |       |       |       |       |   |  |  |  |
| GENE2377X | 19137_at   | 19137_at   | 1    | 2.23  | 2.46  | 3.03  | 3.44 | 3.84  | 2.98  |       |       |       |   |  |  |  |
|           | 2.49       | 2.19       | 2.07 | 1.87  | 2.1   | 1.25  | 1.33 | 1.34  | 1.6   | 0.95  | 0.55  | 1.52  |   |  |  |  |
|           | 1.33       | 0.77       | 1.43 | 1.65  | 1.93  | 1.16  | 0.89 | 0.16  | -0.21 | 0.23  | 0.37  | 0.11  |   |  |  |  |
|           | 0.33       |            |      |       |       |       |      |       |       |       |       |       |   |  |  |  |
| GENE2376X | 19639_at   | 19639_at   | 1    | 0.83  | 1.7   | 1.48  | 1.91 | 2.37  | 1.88  |       |       |       |   |  |  |  |
|           | 1.37       | 1.31       | 0.9  | 0.68  | 0.81  | 1     | 1    | 0.56  | 1.18  | 0.22  | 0.22  | 0.95  |   |  |  |  |

|           |            |            |       |      |      |      |      |       |       |       |       |   |
|-----------|------------|------------|-------|------|------|------|------|-------|-------|-------|-------|---|
| 0.95      | 0.32       | 0.69       | 1.64  | 0.84 | 0.68 | 0.65 | 0.23 | 0.21  | 0     | 0.21  | -0.3  | - |
| 0.41      |            |            |       |      |      |      |      |       |       |       |       |   |
| GENE2375X | 18012_s_at | 18012_s_at | 1     |      |      | 3.67 | 2.78 | 3.78  | 3.78  | 4.35  | 3.76  |   |
| 2.22      | 1.64       | 2.32       | 1.58  | 1.26 | 1.23 | 1.62 | 0.89 | 2.92  | 1.48  | 0.67  | 2.37  |   |
| 2.8       | 1.6        | 2.64       | 3.53  | 2.22 | 1.82 | 1.09 | 2    | 0     | 0.44  | -1.15 | 0     | - |
| 0.15      |            |            |       |      |      |      |      |       |       |       |       |   |
| GENE2374X | 15641_s_at | 15641_s_at | 1     |      |      | 2.44 | 2.58 | 3.98  | 4.13  | 3.78  | 3.18  |   |
| 1.86      | 1.42       | 1.95       | 2.13  | 1.58 | 1.29 | 1.79 | 0.84 | 3.07  | 0.53  | 1     | 2.72  |   |
| 3.13      | 1.95       | 3.2        | 2.87  | 2.45 | 2.04 | 1.52 | 2.43 | 0.73  | 1.07  | 0.41  | 0.05  |   |
| 0.11      |            |            |       |      |      |      |      |       |       |       |       |   |
| GENE2373X | 17967_at   | 17967_at   | 1     |      |      | 2.67 | 2.23 | 2.71  | 3.37  | 2.67  | 2.85  |   |
| 1.28      | 1.93       | 1.32       | 0.77  | 0.84 | 0.84 | 1.26 | 0.58 | 1.94  | 0.45  | 0.16  | 1.84  |   |
| 2.37      | 1.47       | 2.78       | 2.2   | 2.78 | 2.15 | 1.41 | 2    | 0.91  | 0.91  | 0     | 0.07  | - |
| 0.47      |            |            |       |      |      |      |      |       |       |       |       |   |
| GENE2372X | 14614_at   | 14614_at   | 1     |      |      | 2.21 | 2.41 | 2.42  | 3.34  | 2.37  | 1.75  |   |
| 1.11      | 0.7        | 0.87       | 0.93  | 1.09 | 1.39 | 1.4  | 0.29 | 1.74  | 0.2   | -0.13 | 1.84  |   |
| 2.2       | 0.43       | 1.37       | 1.25  | 1.77 | 1.56 | 1.05 | 0.58 | 0.29  | -0.07 | -0.21 | -0.28 | - |
| 0.12      |            |            |       |      |      |      |      |       |       |       |       |   |
| GENE2365X | 12347_at   | 12347_at   | 1     |      |      | 1.53 | 1.57 | 1.71  | 1.57  | 1.61  | 1.84  |   |
| 0.93      | 1.2        | 0.38       | 0.2   | 0.37 | 0.59 | 0.73 | 0.47 | 1.18  | 0.64  | 0.81  | 0.34  |   |
| 1.3       | 1.4        | 0.89       | 0.8   | 0.56 | 0.59 | 0.17 | 0.68 | 0.08  | 0.05  | 0     | 0.35  |   |
| 0.37      |            |            |       |      |      |      |      |       |       |       |       |   |
| GENE2364X | 13534_at   | 13534_at   | 1     |      |      | 1.28 | 1.19 | 1.25  | 1.47  | 1.4   | 1.48  |   |
| 0.87      | 0.91       | 0.62       | -0.02 | 0.12 | 0.44 | 0.8  | 0.2  | 0.71  | 0.4   | 0.26  | 0.27  |   |
| 0.94      | 0.83       | 0.81       | 0.88  | 0.76 | 0.73 | 0.27 | 0.32 | -0.39 | -0.23 | -0.23 | 0.22  |   |
| 0.18      |            |            |       |      |      |      |      |       |       |       |       |   |
| GENE2363X | 18262_at   | 18262_at   | 1     |      |      | 0.59 | 0.86 | 1.01  | 1.08  | 1.05  | 0.84  |   |
| 0.53      | 0.73       | 0.05       | 0.26  | 0.25 | 0.53 | 0.55 | 0.2  | 0.68  | 0.16  | 0.25  | 0.42  |   |
| 0.46      | 0.2        | 0.21       | 0.21  | 0.46 | 0.38 | 0.33 | 0.32 | -0.12 | -0.12 | -0.08 | -0.1  | - |
| 0.01      |            |            |       |      |      |      |      |       |       |       |       |   |
| GENE2362X | 18686_at   | 18686_at   | 1     |      |      | 0.91 | 0.79 | 1.1   | 1.48  | 1.11  | 1.14  |   |
| 0.28      | 0.62       | 0.23       | 0.59  | 0.36 | 0.64 | 0.51 | 0.2  | 0.64  | 0.42  | 0.37  | 0.56  |   |
| 0.65      | 0.35       | 0.49       | 0.31  | 0.75 | 0.32 | 0.28 | 0.5  | 0.29  | -0.02 | -0.07 | 0.18  |   |
| 0.12      |            |            |       |      |      |      |      |       |       |       |       |   |
| GENE2468X | 15063_at   | 15063_at   | 1     |      |      | 1.26 | 0.65 | 1.03  | 1.52  | 0.94  | 1.03  |   |
| 1.37      | 1.2        | 0.45       | 0.15  | 0.42 | 0.26 | 0.4  | 0.76 | 0.36  | 0.38  | 0.46  | 0.92  |   |
| 1.48      | -0.51      | 0.41       | 1.07  | 0.75 | 0.53 | 0.07 | 0.95 | -0.05 | -0.15 | -0.13 | 0.08  |   |
| 0.11      |            |            |       |      |      |      |      |       |       |       |       |   |
| GENE2370X | 17781_at   | 17781_at   | 1     |      |      | 3.09 | 3.2  | 4.25  | 4.29  | 3.62  | 3.91  |   |
| 3.73      | 4.19       | 1.74       | 1     | 1.09 | 1    | 1.17 | 2.71 | 2.28  | 0.63  | 0.63  | 2.68  |   |
| 4.02      | 1.38       | 2.34       | 2.6   | 2.29 | 2.26 | 0.85 | 0.45 | 0.46  | 0     | -0.53 | -1    | - |
| 0.59      |            |            |       |      |      |      |      |       |       |       |       |   |
| GENE2369X | 14638_at   | 14638_at   | 1     |      |      | 2.12 | 1.84 | 3.1   | 3.05  | 1.65  | 1.76  |   |
| 1.67      | 1.87       | 1          | 1.37  | 0.88 | 0.77 | 0.79 | 1.37 | 1.54  | 0.87  | 0.07  | 1.67  |   |
| 1.83      | 0          | 1.77       | 1.05  | 1.2  | 0.55 | 0.44 | 0.42 | 0.27  | 0.56  | 0.28  | -0.26 | - |
| 0.43      |            |            |       |      |      |      |      |       |       |       |       |   |
| GENE2368X | 13190_s_at | 13190_s_at | 1     |      |      | 1.04 | 0.97 | 1.82  | 1.39  | 1.2   | 1.19  |   |
| 1.02      | 1.07       | 0.27       | 0.4   | 0.28 | 0.42 | 0.32 | 0.47 | 0.87  | 0.36  | 0.18  | 0.62  |   |
| 0.81      | 0.08       | 0.47       | 0.65  | 0.35 | 0.22 | 0.05 | 0.5  | 0.46  | 0.27  | 0.04  | 0.31  |   |
| 0.01      |            |            |       |      |      |      |      |       |       |       |       |   |
| GENE2367X | 16103_s_at | 16103_s_at | 1     |      |      | 0.84 | 0.9  | 1.68  | 1.52  | 1.15  | 1.56  |   |
| 1.05      | 1.66       | 0.45       | 0.51  | 0.58 | 0.41 | 0.27 | 0.65 | 0.83  | 0.15  | 0.08  | 0.68  |   |
| 1.24      | 0.08       | 0.7        | 0.69  | 0.65 | 0.54 | 0.41 | 0.69 | 0.47  | 0.35  | 0.2   | 0.56  |   |
| 0.13      |            |            |       |      |      |      |      |       |       |       |       |   |
| GENE2518X | 18268_s_at | 18268_s_at | 1     |      |      | 1.75 | 1.81 | 2.02  | 2.51  | 1.83  | 1.97  |   |
| 1.66      | 1.69       | 0.58       | 0.89  | 0.67 | 0.42 | 0.66 | 0.86 | 1.35  | -0.04 | 0.05  | 1.02  |   |

|           |            |      |            |       |      |      |      |      |       |       |       |       |
|-----------|------------|------|------------|-------|------|------|------|------|-------|-------|-------|-------|
|           | 2.25       | 1.66 | 1.82       | 1.42  | 2.4  | 2.15 | 1.58 | 1.56 | 0.55  | 0.67  | 0.26  | 0.61  |
|           | 0.38       |      |            |       |      |      |      |      |       |       |       |       |
| GENE2319X | 13966_at   |      | 13966_at   |       | 1    | 0.91 | 1.48 | 2.52 | 2.71  | 1.54  | 1.05  |       |
|           | 2.09       | 1.81 | 0.6        | 1.39  | 0.83 | 0.91 | 0.21 | 1.39 | 1.45  | -0.34 | -0.08 | 1.32  |
|           | 2.51       | 0.73 | 1.55       | 1.42  | 1.91 | 1.7  | 1.28 | 1.49 | 0.33  | -0.04 | 0.55  | 0.52  |
|           | 0.04       |      |            |       |      |      |      |      |       |       |       |       |
| GENE2318X | 20182_at   |      | 20182_at   |       | 1    | 1.07 | 1.2  | 1.21 | 2.18  | 1.09  | 0.87  |       |
|           | 1.2        | 1.18 | 0.04       | 0.47  | 0.9  | 0.69 | 0.98 | 0.96 | 0.83  | 0.18  | -0.07 | 1.08  |
|           | 1.61       | 1.15 | 0.95       | 0.46  | 1.52 | 1.15 | 0.32 | 0.97 | 0.12  | -0.25 | -0.37 | 0.5   |
|           | 0.09       |      |            |       |      |      |      |      |       |       |       |       |
| GENE2323X | 17840_at   |      | 17840_at   |       | 1    | 4.68 | 5.49 | 3.88 | 7.1   | 4.22  | 4.31  |       |
|           | 3.26       | 3.4  | 2.61       | 1.13  | 3.03 | 2.11 | 2.97 | 2.24 | 3.35  | 0.12  | 0.56  | 4.33  |
|           | 3.94       | 3.32 | 3.74       | 2.05  | 3.48 | 2.05 | 2.48 | 3.26 | 1.37  | 1.48  | 1.76  | 1.11  |
|           | 1.8        |      |            |       |      |      |      |      |       |       |       |       |
| GENE2322X | 14116_at   |      | 14116_at   |       | 1    | 1.9  | 1.67 | 2.55 | 3.3   | 1.17  | 1.05  |       |
|           | 1.53       | 1.41 | 0.6        | 1.18  | 1.39 | 1.13 | 1.06 | 1.05 | 1.55  | 0.13  | 0.21  | 1.77  |
|           | 2.08       | 0.64 | 1.13       | 0.88  | 1.54 | 1.46 | 1.13 | 1.42 | 0.96  | 0.79  | 0.83  | 0.4   |
|           | 0.2        |      |            |       |      |      |      |      |       |       |       |       |
| GENE2321X | 13025_at   |      | 13025_at   |       | 1    | 1.7  | 1.33 | 1.97 | 2.16  | 1.59  | 1.26  |       |
|           | 1.03       | 0.87 | 0.66       | 0.76  | 0.71 | 0.68 | 0.73 | 1.02 | 1.26  | 0.12  | 0.56  | 1.27  |
|           | 2.09       | 0.73 | 0.41       | 0.85  | 0.73 | 0.58 | 0.33 | 0.67 | -0.07 | -0.07 | 0     | 0.58  |
|           | 0.46       |      |            |       |      |      |      |      |       |       |       |       |
| GENE2320X | 19178_at   |      | 19178_at   |       | 1    | 1.35 | 1.65 | 1.91 | 2.23  | 0.81  | 1.05  |       |
|           | 1.32       | 1.31 | 0.55       | 0.07  | 0.93 | 0.46 | 1.06 | 0.84 | 0.88  | 0.04  | 0.44  | 1.4   |
|           | 1.88       | 0.66 | 0.38       | 1.04  | 0.84 | 1.01 | 0.76 | 0.73 | 0.29  | 0.02  | -0.08 | 0.34  |
|           | 0.16       |      |            |       |      |      |      |      |       |       |       |       |
| GENE2507X | 15782_at   |      | 15782_at   |       | 1    | 1.39 | 1.7  | 1.3  | 1.44  | 1.56  | 1.59  |       |
|           | 0.6        | 0.58 | 0.64       | -0.21 | 0.44 | 0.37 | 0.88 | 0.13 | 0.55  | 0.62  | 0.65  | 1.09  |
|           | 1.29       | 0.65 | 0.69       | 1.5   | 0.34 | 0.49 | 0.25 | 0.75 | 0.38  | 0.38  | 0     | 0.22  |
|           | 0.15       |      |            |       |      |      |      |      |       |       |       |       |
| GENE2506X | 18330_at   |      | 18330_at   |       | 1    | 1.19 | 1.18 | 1.23 | 1.25  | 1.29  | 1.22  |       |
|           | 0.76       | 0.68 | 0.61       | -0.35 | 0.32 | 0.16 | 0.46 | 0.27 | 0.16  | 0.37  | 0.71  | 0.64  |
|           | 1.12       | 0.49 | 0.43       | 1.07  | 0.78 | 0.84 | 0.76 | 0.82 | -0.3  | 0.11  | -0.07 | 0.07  |
|           | 0.02       |      |            |       |      |      |      |      |       |       |       |       |
| GENE2505X | 19644_at   |      | 19644_at   |       | 1    | 1.35 | 1.45 | 1.18 | 1.28  | 1.08  | 1.59  |       |
|           | 0.87       | 1.33 | 0.92       | -0.32 | 0.52 | 0.45 | 0.63 | 0.49 | 0.88  | 0.48  | 1.01  | 1.13  |
|           | 1.69       | 1.17 | 1.96       | 1.35  | 0.97 | 0.57 | 1.15 | 0.38 | 0.33  | 0.25  | 0.46  | 0.35  |
| GENE2504X | 13070_at   |      | 13070_at   |       | 1    | 1.68 | 1.37 | 1.22 | 1.26  | 0.91  | 1.59  |       |
|           | 0.72       | 1.27 | 0.63       | 0.12  | 0.25 | 0.43 | 0.54 | 0.62 | 0.31  | 0.35  | 0.96  | 0.73  |
|           | 1.47       | 0.7  | 0.58       | 1.48  | 1.22 | 0.96 | 0.94 | 1.09 | 0.69  | 0.55  | 0.34  | 0.52  |
|           | 0.66       |      |            |       |      |      |      |      |       |       |       |       |
| GENE2448X | 18255_at   |      | 18255_at   |       | 1    | 2.51 | 2.2  | 2.62 | 3.08  | 2.3   | 1.83  |       |
|           | 2.43       | 2.01 | 0.61       | -0.25 | 0.46 | 0.4  | 0.82 | 0.65 | 0.79  | 0.66  | 0.98  | 1.96  |
|           | 1.79       | 1.17 | 2.23       | 1.44  | 1.84 | 1.41 | 0.9  | 0.35 | 0.55  | 0.78  | 0.37  | 0.4   |
|           | 0.22       |      |            |       |      |      |      |      |       |       |       |       |
| GENE2447X | 15866_s_at |      | 15866_s_at |       | 1    | 1.78 | 1.65 | 1.92 | 2.49  | 1.37  | 1.17  |       |
|           | 1.64       | 1.42 | 0.51       | -0.18 | 0.83 | 0.5  | 0.69 | 0.52 | 0.75  | 0.51  | 1     | 1.72  |
|           | 1.52       | 1.29 | 1.79       | 0.91  | 1.45 | 1.27 | 0.88 | 0.71 | -0.34 | 0.32  | 0.22  | 0.26  |
|           | 0.31       |      |            |       |      |      |      |      |       |       |       |       |
| GENE2449X | 12880_at   |      | 12880_at   |       | 1    | 2.28 | 1.38 | 1.35 | 2.94  | 1.66  | 1.52  |       |
|           | 1.69       | 1.63 | 0.36       | -0.39 | 0.56 | 0.76 | 0.88 | 0.84 | 0.75  | 0.81  | 0.43  | 1.92  |
|           | 1.94       | 0.81 | 1.37       | 0.69  | 1.61 | 1.18 | 0.68 | 0.65 | -0.15 | -0.16 | -0.2  | -0.05 |
|           | 0.2        |      |            |       |      |      |      |      |       |       |       |       |
| GENE2310X | 17775_at   |      | 17775_at   |       | 1    | 4.2  | 4.28 | 3.29 | 5.9   | 3.37  | 3.69  |       |
|           | 4.12       | 5.05 | 1.35       | 0.65  | 3.26 | 1.48 | 2.53 | 2.8  | 1.99  | 1.77  | 2.56  | 4.37  |
|           | 4.52       | 2.33 | 3.41       | 0.9   | 3.53 | 2.84 | 1.11 | 0.43 | -0.78 | -0.39 | 0.15  | 0.52  |
|           | 0.59       |      |            |       |      |      |      |      |       |       |       |       |

|           |            |            |            |       |       |       |       |       |       |       |      |
|-----------|------------|------------|------------|-------|-------|-------|-------|-------|-------|-------|------|
| GENE2342X | 16955_at   | 16955_at   | 1          | 2.23  | 1.02  | 1.58  | 1.99  | 1.27  | 1.56  |       |      |
|           | 0.49       | 0.96 0.65  | 0.45 1.2   | 0.49  | 0.62  | 0.6   | 1.11  | 0.81  | 0.94  | 1.41  |      |
|           | 1.74       | 0.47 0.84  | 1.11 0.87  | 0.82  | 0.36  | 0.29  | -0.78 | 0.07  | 0.09  | 0     |      |
|           | 0.04       |            |            |       |       |       |       |       |       |       |      |
| GENE2341X | 15463_at   | 15463_at   | 1          | 2.34  | 1.76  | 1.43  | 2.94  | 1.15  | 1.52  |       |      |
|           | 0.53       | 0.72 0.59  | 0.38 1.17  | 0.55  | 0.73  | 0.29  | 0.82  | 0.72  | 1.2   | 1.9   |      |
|           | 2.16       | 1.2 1.4    | 0.98 1.39  | 1.34  | 0.76  | 0.56  | 0.02  | 0.33  | 0.33  | 0.2   |      |
|           | 0.13       |            |            |       |       |       |       |       |       |       |      |
| GENE2311X | 13944_at   | 13944_at   | 1          | 2.26  | 2     | 1.38  | 1.84  | 1.4   | 1.33  |       |      |
|           | 0.68       | 0.65 0.38  | -0.45 0.48 | 0.76  | 1.07  | -0.07 | 0.65  | 1.04  | 1.2   | 0.97  |      |
|           | 1.02       | 1.45 1.6   | 0.82 1.46  | 1.33  | 0.75  | -0.37 | -0.2  | 0.65  | 0.41  | -0.37 |      |
|           | 0.28       |            |            |       |       |       |       |       |       |       |      |
| GENE2490X | 15137_s_at | 15137_s_at | 1          | 6.67  | 3.97  | 4.28  | 7.26  | 4.52  | 3.36  |       |      |
|           | 4.66       | 3.91 1.3   | -1.28 0.84 | -1.39 | 1.82  | 1.82  | 1.22  | 0.84  | 2.26  | 4.58  |      |
|           | 4.99       | 4.3 4.52   | 2.74 4.15  | 3.81  | 2.63  | 3.05  | 1.61  | 1.71  | -0.49 | 1.67  |      |
|           | 0.26       |            |            |       |       |       |       |       |       |       |      |
| GENE2489X | 16008_i_at | 16008_i_at | 1          | 2.41  | 0.94  | 1.57  | 2.49  | 0.88  | 1.33  |       |      |
|           | 1.15       | 1.5 0.08   | -0.68 0.07 | -0.16 | 0.26  | 0.73  | 0.65  | -0.04 | 0.25  | 1.45  |      |
|           | 2.19       | 0.97 1.47  | 0.93 1.45  | 1.75  | 0.97  | 1.22  | 0.63  | 0.58  | 0.25  | 0.68  |      |
|           | 0.31       |            |            |       |       |       |       |       |       |       |      |
| GENE2488X | 16009_s_at | 16009_s_at | 1          | 2.08  | 0.89  | 1.51  | 2.4   | 0.87  | 1.13  |       |      |
|           | 0.84       | 1.09 0.02  | -0.57 0.05 | -0.08 | 0.2   | 0.33  | 0.6   | -0.15 | 0.23  | 1.3   |      |
|           | 2.02       | 0.93 1.37  | 0.82 1.22  | 1.43  | 0.72  | 1.09  | 0.54  | 0.57  | 0.34  | 0.61  |      |
|           | 0.25       |            |            |       |       |       |       |       |       |       |      |
| GENE2487X | 16357_at   | 16357_at   | 1          | 4.53  | 2.14  | 3.1   | 5.53  | 2.46  | 2.14  |       |      |
|           | 1.72       | 1.86 0.09  | -1.88 0.26 | -0.16 | 0.38  | -0.3  | 1.35  | 0.18  | 1     | 3.23  |      |
|           | 4.43       | 3.58 4.17  | 1.89 4.05  | 3.66  | 2.45  | 1.92  | 0     | 1.37  | 0     | 0.84  |      |
|           | 0.84       |            |            |       |       |       |       |       |       |       |      |
| GENE2486X | 16570_s_at | 16570_s_at | 1          | 3.68  | 2.39  | 2.43  | 3.75  | 2.03  | 3.05  |       |      |
|           | 1.6        | 1.63 0.69  | -0.88 0.15 | 0.16  | 1.2   | 0.05  | 1.56  | 0.18  | 0.73  | 2.77  |      |
|           | 3.52       | 2.87 3     | 2.15 3.08  | 2.86  | 1.62  | 1.05  | 0.81  | 0.71  | 0.43  | 0.01  |      |
|           | 0.32       |            |            |       |       |       |       |       |       |       |      |
| GENE2485X | 14032_at   | 14032_at   | 1          | 4.62  | 2.95  | 4.18  | 5.98  | 2.15  | 2.19  |       |      |
|           | 2.06       | 2.22 -0.47 | -0.08 0.58 | 0.51  | 0.84  | -0.15 | 2.33  | 0.23  | 0.36  | 4.11  |      |
|           | 4.6        | 3.21 4.88  | 1.4 4.73   | 4.17  | 2.58  | 0.67  | 1.22  | 1.73  | 1.41  | 1.14  |      |
|           | 0.5        |            |            |       |       |       |       |       |       |       |      |
| GENE2484X | 14763_at   | 14763_at   | 1          | 3.91  | 2.18  | 4.37  | 4.12  | 1.93  | 2.47  |       |      |
|           | 1.32       | 1.67 0.32  | 0 0        | -0.57 | 0.34  | 0.08  | 1.13  | 0.91  | 1.33  | 2.67  |      |
|           | 4.3        | 1.41 3.23  | 1.75 2.62  | 2.62  | 1.18  | 0.72  | 0     | 0     | 0     | 0.32  | -    |
|           | 0.26       |            |            |       |       |       |       |       |       |       |      |
| GENE2480X | 17051_s_at | 17051_s_at | 1          | 2.46  | 1.69  | 2.39  | 3.82  | 1.7   | 1.74  |       |      |
|           | 0.78       | 1.33 0.15  | -0.57 0.62 | 0.22  | 0.08  | 0.33  | 0     | -0.43 | -0.55 | 2.82  |      |
|           | 4.2        | 1.34 2.38  | 1.43 2.37  | 1.53  | 1.32  | 1.88  | 1.1   | 0.2   | 0.15  | 0.93  |      |
|           | 0.08       |            |            |       |       |       |       |       |       |       |      |
| GENE2479X | 12764_f_at | 12764_f_at | 1          | 2     | 1.63  | 2.62  | 4.07  | 1.42  | 1.23  |       |      |
|           | 1.29       | 1.25 0.18  | -1 1.01    | -0.62 | -0.12 | -0.25 | 1.1   | -0.66 | 0.04  | 2.57  |      |
|           | 2.95       | 1.23 1.63  | 0.88 1.44  | 1.42  | 1.18  | 1.55  | 0.13  | 0.72  | 0.54  | 0.5   |      |
|           | 0.31       |            |            |       |       |       |       |       |       |       |      |
| GENE2478X | 15118_s_at | 15118_s_at | 1          | 1.65  | 0.63  | 1.78  | 3.08  | 0.73  | 0.9   |       |      |
|           | 0.77       | 0.8 0.25   | -0.86 0.7  | -0.53 | -0.25 | -0.07 | 0.73  | -0.57 | 0.17  | 2.14  |      |
|           | 2.12       | 0.59 1.32  | 0.58 1.26  | 1.29  | 1.2   | 0.85  | 0.26  | 0.58  | 0.42  | 0.31  |      |
|           | 0.01       |            |            |       |       |       |       |       |       |       |      |
| GENE1629X | 16972_at   | 16972_at   | 1          | 1.37  | 1.11  | 2.01  | 1.59  | 1.35  | 1.49  |       | -    |
|           | 0.1        | 0.09 0.52  | -0.13 0.17 | 0.01  | 0.87  | -0.45 | 1.19  | -0.16 | 0.15  | 1.7   | 2.01 |
|           | 1.73       | 0.79 1.11  | 1.48 1.36  | 1.37  | 1.59  | -0.3  | 0     | -0.57 | 0.43  | 0.17  |      |
| GENE1628X | 15032_at   | 15032_at   | 1          | 1.41  | 0.63  | 1.36  | 1.76  | 1.22  | 1.75  |       |      |
|           | 0.25       | 0.74 0.66  | 0.44 0.79  | 0.05  | 0.35  | 0.23  | 0.93  | -0.07 | 0.11  | 1.2   |      |







|           |            |            |       |       |       |       |      |       |       |       |       |       |      |   |
|-----------|------------|------------|-------|-------|-------|-------|------|-------|-------|-------|-------|-------|------|---|
| GENE1681X | 19465_at   | 19465_at   | 1     | 1.88  | 1.74  | 1.85  | 2.56 | 2.22  | 2.56  |       |       |       |      |   |
|           | 1.24       | 1.61       | 0.79  | -1.59 | 0.41  | 0.26  | 0.72 | 0.32  | 0.73  | 0     | 0.29  | 1.66  |      |   |
|           | 3.04       | 3          | 4.27  | 2.13  | 2.4   | 2.18  | 1    | 0.61  | 0.21  | 0.58  | 0.58  | 0.17  | -    |   |
|           | 0.1        |            |       |       |       |       |      |       |       |       |       |       |      |   |
| GENE1680X | 13256_s_at | 13256_s_at | 1     | 1.08  | 1.07  | 1.71  | 1.95 | 1.59  | 2.17  |       |       |       |      |   |
|           | 1.27       | 1.22       | 0.37  | -1.02 | -0.78 | -0.41 | 0.62 | -0.21 | 1.12  | -0.25 | -0.26 | 1.49  |      |   |
|           | 2.76       | 2.43       | 3.46  | 1.92  | 2.58  | 2.11  | 0.7  | 0.31  | 0.41  | 0.11  | 0.2   | -0.02 | -    |   |
|           | 0.73       |            |       |       |       |       |      |       |       |       |       |       |      |   |
| GENE1679X | 12539_s_at | 12539_s_at | 1     | 1.5   | 2.28  | 1.66  | 2.51 | 1.34  | 1.67  |       |       |       |      |   |
|           | 2.37       | 2.02       | -0.3  | -1.55 | -0.43 | -0.16 | 0.37 | 0.42  | 0.87  | -1    | -0.25 | 1.59  |      |   |
|           | 2.91       | 2.74       | 3.54  | 1.51  | 2.67  | 2.32  | 0.93 | 0.47  | 0.57  | 0.51  | 0.01  | -0.26 | -    |   |
|           | 0.39       |            |       |       |       |       |      |       |       |       |       |       |      |   |
| GENE1678X | 18287_at   | 18287_at   | 1     | 1.63  | 1.21  | 1.84  | 2.2  | 1.11  | 1.4   |       |       |       |      |   |
|           | 0.83       | 1.18       | -0.2  | -1    | -0.73 | -0.51 | 0.05 | -0.3  | 0.94  | -0.32 | 0.18  | 1.29  |      |   |
|           | 2.44       | 2.06       | 2.52  | 1     | 2.34  | 1.92  | 1.1  | 1     | 0.66  | 0.26  | 0.11  | 0.43  |      |   |
|           | 0.01       |            |       |       |       |       |      |       |       |       |       |       |      |   |
| GENE1670X | 12695_at   | 12695_at   | 1     | 1.19  | 0.48  | 0.76  | 1.15 | 0.43  | 1.63  |       |       |       |      |   |
|           | 0.45       | 0.8        | 0.22  | 0.43  | 0     | -0.15 | 0.07 | 0.08  | 0.92  | -0.39 | 0.43  | 0.91  |      |   |
|           | 1.66       | 1.95       | 1.82  | 1     | 2.2   | 2.64  | 0.8  | 1.11  | -1.88 | -0.26 | 0.15  | -0.39 |      |   |
|           | 0.29       |            |       |       |       |       |      |       |       |       |       |       |      |   |
| GENE1669X | 20128_at   | 20128_at   | 1     | 2.07  | 2.37  | 0     | 1    | 2.17  | 3.24  | 2     |       |       |      |   |
|           | 3.58       | 0.69       | -0.86 | 0     | 0     | 0.48  | 1.41 | 0.15  | 0     | 0.48  | 1.92  | 4.12  |      |   |
|           | 3.1        | 2.8        | 3.02  | 3.29  | 3.56  | 0.67  | 1.13 | 0     | 0     | 0     | 0     | 0     |      |   |
| GENE1668X | 15424_at   | 15424_at   | 1     | 3.67  | 1.84  | 2.5   | 3    | 2.58  | 4.33  |       |       |       |      |   |
|           | 2.2        | 3.63       | 2.88  | -0.26 | 0.26  | 0     | 1.58 | 2.92  | 3.82  | 0     | 2.07  | 2.13  |      |   |
|           | 5.31       | 4.29       | 5.07  | 4.27  | 5     | 5.09  | 0    | 0     | 0     | 0     | 0     | 0     |      | 0 |
| GENE1667X | 15533_at   | 15533_at   | 1     | 1.67  | 1     | 1     | 1.37 | 1.67  | 3.43  | 0     |       |       |      |   |
|           | 2.63       | 0          | 0     | 1     | 0     | 1     | 1.58 | 2     | 0.48  | 0.26  | 1.84  | 2.84  |      |   |
|           | 2.84       | 3.13       | 2.07  | 2.48  | 2.48  | 0     | 0.67 | 0     | 0     | 0     | 0.48  | 0     |      |   |
| GENE1646X | 12128_at   | 12128_at   | 1     | 4.53  | 3.6   | 4     | 4.43 | 3.94  | 5     |       |       |       |      |   |
|           | 2.11       | 2.32       | 2.92  | 1.37  | 1.48  | 0.84  | 2.48 | 1.37  | 3.2   | 2.53  | 3.53  | 3.78  |      |   |
|           | 5.34       | 4.57       | 4.39  | 4.99  | 5.39  | 5.38  | 4.47 | 3.82  | 0.2   | 1.69  | 0     | 1.89  |      |   |
|           | 1.51       |            |       |       |       |       |      |       |       |       |       |       |      |   |
| GENE1645X | 17341_at   | 17341_at   | 1     | 3.1   | 1.47  | 1.65  | 2.32 | 1.68  | 3.14  |       |       |       |      |   |
|           | 1.25       | 1.92       | 1.33  | -0.49 | 0.48  | 0.82  | 1.35 | 1.13  | 1.94  | 1.26  | 1.26  | 3     |      |   |
|           | 4.26       | 3.48       | 3.72  | 2.82  | 4.18  | 4.49  | 2.8  | 2.2   | 0     | 0     | 0     | 0.26  | 0    |   |
| GENE1644X | 13659_at   | 13659_at   | 1     | 4.84  | 2.47  | 1.96  | 2.32 | 2.4   | 3.72  |       |       |       |      |   |
|           | 1.83       | 2.64       | 2.35  | 0     | 0.67  | 0.77  | 1.58 | 1.81  | 0.53  | 1.58  | 2.13  | 2.32  |      |   |
|           | 5.11       | 2.72       | 1.84  | 3.11  | 4.61  | 4.72  | 3.77 | 1.62  | 1     | 0     | 0     | 0.48  | 0    |   |
| GENE1643X | 15139_s_at | 15139_s_at | 1     | 1.4   | 0.43  | 0.66  | 1.05 | 0.43  | 0.87  |       |       |       |      |   |
|           | 0.66       | 0.62       | 0.23  | 0.13  | 0.26  | 0.37  | 0.32 | 0.41  | 0.29  | 0.37  | 0.36  | 0.65  |      |   |
|           | 0.87       | 0.53       | 0.68  | 0.49  | 1.3   | 1.21  | 1.11 | 0.58  | 0.23  | 0.33  | 0.4   | 0.16  |      |   |
|           | 0.08       |            |       |       |       |       |      |       |       |       |       |       |      |   |
| GENE1642X | 16409_at   | 16409_at   | 1     | 2.72  | 2.24  | 1.41  | 1    | 1.87  | 1.7   |       |       |       |      |   |
|           | 1.77       | 1.34       | -0.13 | 0.21  | 0     | -0.41 | 0.45 | 0     | 0.41  | 0.26  | 0.48  | 0.84  |      |   |
|           | 2.48       | 1.58       | 1.37  | 1.93  | 2.67  | 2.32  | 1.26 | 0.21  | 0     | 0     | 0.67  | 0.26  | 0    |   |
| GENE1641X | 12062_at   | 12062_at   | 1     | 1.56  | 0.73  | 0.79  | 0.77 | 0.89  | 1.71  |       |       |       |      |   |
|           | 0.58       | 1.12       | 0.5   | 0.48  | 0.13  | -0.45 | 0.29 | 0.43  | 0.73  | -0.12 | -0.12 | 0.73  |      |   |
|           | 1.32       | 0.95       | 1.05  | 1.09  | 1.37  | 1.34  | 1.2  | 0.53  | -0.39 | 0.6   | 0.52  | 0.07  | 0    |   |
| GENE2283X | 18745_f_at | 18745_f_at | 1     | 0.35  | 1.3   | 1.59  | 1.83 | 1.64  | 0.34  |       |       |       |      |   |
|           | 1.09       | 1.11       | 0.49  | 0.72  | 0.48  | 0.32  | 0.34 | 0.96  | 0.23  | -0.25 | 0.01  | 0.2   |      |   |
|           | 0.17       | 0.86       | 0.83  | -0.21 | 1.53  | 1.72  | 1.51 | 1.38  | 0.31  | 0.44  | 0.02  | 0.26  |      |   |
|           | 0.25       |            |       |       |       |       |      |       |       |       |       |       |      |   |
| GENE2282X | 13408_s_at | 13408_s_at | 1     | 0.54  | 0.89  | 1.59  | 2    | 1.61  | 2.1   | -     |       |       |      |   |
|           | 0.26       | 1.72       | 0.73  | 0.61  | 0.71  | 0.08  | 0.53 | 1.12  | 0.75  | -0.16 | -0.3  | -0.18 | 0.56 |   |
|           | 0.31       | 0.84       | 0.42  | 1.72  | 1.5   | 1.23  | 0.8  | 0.8   | 0.41  | 0.27  | 0.73  | 0.75  |      |   |



|           |            |            |       |       |       |       |       |       |       |       |       |       |
|-----------|------------|------------|-------|-------|-------|-------|-------|-------|-------|-------|-------|-------|
| GENE2281X | 17852_g_at | 17852_g_at | 1     | 0.5   | 0.41  | 1.44  | 1.43  | 1.3   | 1.13  |       |       |       |
|           | 0.67       | 1.07       | 0.62  | 0.69  | 0.68  | -0.34 | 0.25  | 0.22  | 0.65  | -0.1  | -0.15 | 0.56  |
|           | 0.2        | 0.2        | 0.43  | 0.76  | 1.05  | 0.88  | 0.76  | 0.73  | 0.53  | 0.5   | 0.49  | 0.27  |
|           | 0.15       |            |       |       |       |       |       |       |       |       |       |       |
| GENE2278X | 12037_at   | 12037_at   | 1     | 0.74  | 0.71  | 0.49  | 1.73  | 0.76  | 0.74  |       |       |       |
|           | 1.17       | 1.48       | -0.13 | 0.91  | 0.38  | 0.88  | 0.81  | 1.56  | 0.69  | -1    | -1    | 0.53  |
|           | 0.91       | -0.47      | 0.63  | 0.71  | 1.29  | 1.26  | 1.11  | 1.38  | 0.42  | 1.13  | 1.2   | 0.11  |
|           | 0.3        |            |       |       |       |       |       |       |       |       |       |       |
| GENE1758X | 16222_at   | 16222_at   | 1     | 2.7   | 2.13  | 3.6   | 3.94  | 4.79  | 4.29  |       |       |       |
|           | 3.29       | 2.58       | 2.72  | 0     | 0     | 0     | 0     | -0.26 | 0     | 0.45  | 0.8   | 0.48  |
|           | 3.96       | 2.83       | 3.87  | 5.22  | 2.41  | 2.86  | 2.33  | 4.65  | 3     | 3.37  | 2.85  | 2.01  |
|           | 1.1        |            |       |       |       |       |       |       |       |       |       |       |
| GENE1757X | 14640_at   | 14640_at   | 1     | 2.68  | 2.49  | 4.01  | 4.83  | 3.69  | 2.35  |       |       |       |
|           | 2.3        | 1.17       | 2.26  | -0.23 | 0.92  | -0.51 | -0.08 | 0.55  | -0.23 | 0.26  | 0.45  | 2.17  |
|           | 5.75       | 2.37       | 3.25  | 4.43  | 2.38  | 2.24  | 1.95  | 4.25  | 3.18  | 3     | 2.62  | 2.44  |
|           | 1.44       |            |       |       |       |       |       |       |       |       |       |       |
| GENE1756X | 13631_at   | 13631_at   | 1     | 1.31  | 1.85  | 1.91  | 2.63  | 2.91  | 1.07  |       |       |       |
|           | 2.38       | 0.95       | 1.4   | -0.3  | 1.13  | 0.46  | 0.73  | 1.28  | 0.32  | 0.67  | 0.72  | 1.77  |
|           | 1.85       | 1.63       | 2.65  | 2.17  | 2.39  | 1.98  | 1.5   | 1.77  | 1.98  | 1.96  | 1.33  | 0.76  |
|           | 0.51       |            |       |       |       |       |       |       |       |       |       |       |
| GENE1755X | 12307_at   | 12307_at   | 1     | 2.97  | 3.51  | 2.96  | 3.58  | 2.83  | 2.98  |       |       |       |
|           | 3.23       | 2.23       | 2.15  | 0     | 1.26  | 1.1   | 1.05  | 1.63  | 0     | 0.77  | 1.47  | 2.92  |
|           | 5.56       | 3.7        | 5.34  | 4.18  | 3.5   | 3.61  | 3.74  | 4.36  | 4.83  | 4.87  | 5.02  | 2.98  |
|           | 2.46       |            |       |       |       |       |       |       |       |       |       |       |
| GENE1754X | 18946_at   | 18946_at   | 1     | 3.43  | 3.51  | 5.46  | 5.71  | 3.73  | 1.33  |       |       |       |
|           | 4.09       | 2.2        | 0.86  | 0.5   | 1.13  | -0.13 | 1.83  | 1.42  | 0.83  | -0.62 | 1.1   | 2.63  |
|           | 5.79       | 4.22       | 4.94  | 3.94  | 2.15  | 1.75  | 1.39  | 4.52  | 4.03  | 3.3   | 2.55  | 2.17  |
|           | 0.74       |            |       |       |       |       |       |       |       |       |       |       |
| GENE1753X | 19531_at   | 19531_at   | 1     | 2.18  | 2.26  | 3.5   | 3.64  | 2.41  | 1.49  |       |       |       |
|           | 2.51       | 1.7        | 0.65  | 0.56  | 0.32  | 0.17  | 0.5   | 0.73  | 1.58  | -0.43 | 0.29  | 1.12  |
|           | 2.97       | 1.83       | 2.12  | 2.22  | 2.26  | 2.28  | 1.95  | 2.7   | 2.13  | 2.08  | 1.52  | 1.51  |
|           | 0.6        |            |       |       |       |       |       |       |       |       |       |       |
| GENE1752X | 16235_at   | 16235_at   | 1     | 2.61  | 1.54  | 3.13  | 3.23  | 3.18  | 1.94  |       |       |       |
|           | 1.54       | 1.46       | 0.83  | 0.48  | 0     | -0.41 | 0.32  | 0.94  | 1.37  | -0.59 | -0.59 | 0     |
|           | 2.63       | 1.5        | 2.43  | 2.7   | 2.37  | 1.67  | 1.32  | 2.73  | 2.67  | 2.32  | 2.13  | 1.41  |
| GENE1751X | 16236_g_at | 16236_g_at | 1     | 2.19  | 1.86  | 2.83  | 2.98  | 2.24  | 1.17  |       |       |       |
|           | 1.53       | 1.13       | 0.71  | 0.48  | -0.07 | 0.09  | 0.51  | 0.64  | 1.29  | -0.12 | 0.65  | 0.13  |
|           | 2.2        | 1.4        | 3.08  | 2.02  | 2     | 1.48  | 1.67  | 2.23  | 3.38  | 2.89  | 2.55  | 1.63  |
|           | 0.66       |            |       |       |       |       |       |       |       |       |       |       |
| GENE1750X | 12079_s_at | 12079_s_at | 1     | 1     | 1     | 3.26  | 2.58  | 3.74  | 1.26  |       |       |       |
|           | 3.58       | 1.84       | 2     | 0     | 0     | 0     | 1.13  | 1.58  | 0     | 0     | 0.84  | 0.84  |
|           | 2.84       | 2.11       | 2.32  | 3.67  | 3.14  | 3.39  | 3.32  | 3.48  | 2.53  | 2.48  | 1.76  | 2.7   |
|           | 1.22       |            |       |       |       |       |       |       |       |       |       |       |
| GENE1749X | 12042_at   | 12042_at   | 1     | -0.1  | 0.68  | 0.94  | 0.59  | 0.66  | 0.48  |       |       |       |
|           | 1.18       | 0.65       | 0.28  | 0     | 0.08  | -0.1  | -0.08 | 0.37  | 0.04  | -0.23 | 0     | -0.13 |
|           | 0.56       | 0.38       | 0.35  | 0.91  | 0.88  | 0.87  | 1.02  | 1.05  | 0.84  | 0.47  | 0.35  | 0.43  |
|           | 0.13       |            |       |       |       |       |       |       |       |       |       |       |
| GENE2285X | 16217_s_at | 16217_s_at | 1     | 1.1   | 1.06  | 0.72  | 0.81  | 1     | -1    |       |       |       |
|           | 0.85       | 0.85       | 0.32  | -0.76 | 0.12  | -0.2  | 0.4   | 1.51  | 0.16  | 0.37  | 0.54  | 0.77  |
|           | 0.6        | 1.05       | 0.43  | 0.69  | 0.16  | 0.94  | 0.43  | -0.26 | 0.49  | 0.16  | -0.71 | -0.16 |
|           | 0.49       |            |       |       |       |       |       |       |       |       |       |       |
| GENE2333X | 16232_s_at | 16232_s_at | 1     | 3.92  | 3.5   | 3.26  | 4.21  | 2.85  | 2.65  |       |       |       |
|           | 1.68       | 3.45       | 2.21  | 2.37  | 2.24  | 1.96  | 2.66  | 2.39  | 2.7   | 1.81  | 2.77  | 2.8   |
|           | 1.58       | 5.01       | 4.95  | 0.95  | 3.96  | 3.13  | 1.05  | 3.82  | 1.49  | 0.58  | 0.16  | 1.49  |
|           | 0.93       |            |       |       |       |       |       |       |       |       |       |       |
| GENE2332X | 19263_at   | 19263_at   | 1     | 3.76  | 2.7   | 2.24  | 3.74  | 2.12  | 2.02  |       |       |       |
|           | 1.05       | 3.27       | 0.77  | 1.11  | 2.53  | 1.58  | 2     | 2.38  | 2.02  | 1.89  | 1.65  | 2.72  |







|           |            |            |            |       |      |      |      |       |      |         |
|-----------|------------|------------|------------|-------|------|------|------|-------|------|---------|
| GENE1665X | 13439_at   | 13439_at   | 1          | 1.87  | 1.86 | 1.29 | 2.03 | 1.62  | 2.21 | 1       |
|           | 2.47       | 0.34 0.34  | 0.15 0.23  | 0.78  | 0.65 | 1    | 0.11 | 0.58  | 1.07 | 2.47    |
|           | 2.79       | 3.33 1.86  | 3.15 2.66  | 1.39  | 1    | 0.12 | 0.53 | -0.66 | 0.5  | -0.12   |
| GENE1664X | 18631_at   | 18631_at   | 1          | 2.38  | 1.87 | 1.7  | 2.78 | 1.66  | 2.79 |         |
|           | 2.2        | 3.02 0.43  | 0.64 0.76  | 1.7   | 1.66 | 1.84 | 1.72 | 0.54  | 0.81 | 2.13    |
|           | 2.32       | 4.11 4.77  | 1.15 4.54  | 4.2   | 1.84 | 0.16 | 0.73 | 0.87  | 1    | -0.78 0 |
| GENE1663X | 15431_at   | 15431_at   | 1          | 3.07  | 2.07 | 1.54 | 2.94 | 1.42  | 2.45 |         |
|           | 1.86       | 2.65 0.54  | -0.08 0.53 | 0.71  | 1.74 | 1.83 | 1.71 | 0.79  | 1.84 | 2.57    |
|           | 3.02       | 4.39 4.66  | 1.81 3.41  | 3.8   | 0.9  | 0.42 | 0.52 | 0.82  | 0.46 | -0.86   |
|           | 0.22       |            |            |       |      |      |      |       |      |         |
| GENE1662X | 17105_at   | 17105_at   | 1          | 1.26  | 0.84 | 0.92 | 2.35 | 1.43  | 1.63 |         |
|           | 1.48       | 1.86 0.53  | -0.28 0.61 | 0.12  | 0.07 | 0.57 | 0.16 | 0     | 0.58 | 1.54    |
|           | 2.15       | 2.21 3.22  | 1.59 2.83  | 2.13  | 0.38 | 0.28 | 0.73 | 0.17  | 0.12 | -0.28 - |
|           | 0.25       |            |            |       |      |      |      |       |      |         |
| GENE1661X | 17303_s_at | 17303_s_at | 1          | 3.55  | 1.96 | 2.49 | 4.49 | 1.96  | 1.93 |         |
|           | 1.9        | 1.98 0.25  | -1.08 0.94 | -0.04 | 0.55 | 0.61 | 1.21 | 0.48  | 1.29 | 3.31    |
|           | 3.93       | 4.19 4.9   | 2.16 3.76  | 3.3   | 1.45 | 2.4  | 1.84 | 1.32  | 1.11 | 0.41    |
|           | 0.63       |            |            |       |      |      |      |       |      |         |
| GENE1660X | 13842_at   | 13842_at   | 1          | 2.86  | 1.65 | 1.79 | 3.87 | 0.87  | 2.31 |         |
|           | 1.26       | 2.47 0.64  | -0.76 1.32 | 0.08  | 1.06 | 0.96 | 1.17 | 1.3   | 1.96 | 3.94    |
|           | 5.24       | 5.05 5.4   | 2.14 3.69  | 3.9   | 1.3  | 1.72 | 2.03 | 1     | 0.78 | 0.67    |
|           | 0.61       |            |            |       |      |      |      |       |      |         |
| GENE1659X | 20142_at   | 20142_at   | 1          | 3.51  | 2.17 | 1.64 | 3.6  | 1.41  | 3.02 |         |
|           | 1.39       | 2.72 -0.02 | -1.15 0.86 | 0     | 1.01 | 0.98 | 2.18 | 0.44  | 0.89 | 3.38    |
|           | 4.3        | 3.97 4.28  | 1.56 2.66  | 3.27  | 0.92 | 0.29 | 1.58 | 0.84  | 1.13 | 0.35    |
|           | 0.26       |            |            |       |      |      |      |       |      |         |
| GENE1658X | 18263_at   | 18263_at   | 1          | 3.36  | 2.29 | 2.28 | 3.69 | 1.15  | 2.33 |         |
|           | 1.71       | 2.57 -0.83 | -0.71 0.23 | 0.12  | 0.64 | 0.26 | 1.26 | 0.12  | 0.97 | 2.52    |
|           | 3.54       | 4.3 3.58   | 1.33 3.29  | 2.84  | 1.43 | 1.46 | 1.11 | 0.04  | 0.56 | 1.17    |
|           | 0.94       |            |            |       |      |      |      |       |      |         |
| GENE1657X | 18284_at   | 18284_at   | 1          | 2.63  | 1.87 | 1.34 | 2.65 | 0.75  | 1.81 |         |
|           | 0.73       | 1.45 0.01  | -0.64 0.65 | 0.61  | 1.08 | 0.02 | 1.02 | 0.79  | 1.98 | 2.09    |
|           | 3.08       | 2.89 2.94  | 0.97 2.33  | 2.13  | 0.4  | 0.91 | 0.48 | 0.33  | 0.31 | 0.31    |
|           | 0.58       |            |            |       |      |      |      |       |      |         |
| GENE1595X | 14882_at   | 14882_at   | 1          | 4.57  | 4.41 | 2.91 | 5.93 | 3.11  | 3.58 |         |
|           | 3.69       | 4.51 0.89  | 0.35 1.72  | 1.74  | 2.53 | 2.52 | 2.47 | 0.77  | 1.96 | 4.55    |
|           | 5.8        | 5.16 5.83  | 2.43 5.31  | 5.08  | 2.7  | 1.87 | 1.14 | 0.58  | 0.43 | 0.81    |
|           | 0.25       |            |            |       |      |      |      |       |      |         |
| GENE1594X | 19970_s_at | 19970_s_at | 1          | 2.42  | 3.2  | 2.09 | 3.6  | 2.09  | 2.53 |         |
|           | 2.17       | 2.9 0.92   | -0.12 1.58 | 1.37  | 1.92 | 1.39 | 1.65 | 1     | 1.24 | 3.17    |
|           | 4.94       | 4.31 3.89  | 2.34 3.78  | 3.76  | 1    | 0.77 | 0.32 | -0.59 | 0    | 0.58    |
|           | 0.58       |            |            |       |      |      |      |       |      |         |
| GENE1593X | 12571_s_at | 12571_s_at | 1          | 2.06  | 1.89 | 1.5  | 2.96 | 1.23  | 1.39 |         |
|           | 0.54       | 1.64 0.46  | 0.07 1.39  | 1.13  | 1.29 | 0.82 | 1.09 | 0.68  | 1.18 | 1.33    |
|           | 2.59       | 2.59 3.14  | 1.02 2.75  | 2.46  | 0.84 | 0.62 | 0.5  | 0.21  | 0.04 | 0.64    |
|           | 0.61       |            |            |       |      |      |      |       |      |         |
| GENE1592X | 17379_at   | 17379_at   | 1          | 2.93  | 1.11 | 1.28 | 2.82 | 1.16  | 2.32 |         |
|           | 1.02       | 1.92 0.72  | 0.8 1.3    | 1.29  | 1.2  | 1.21 | 1.54 | 0.97  | 1.07 | 2.73    |
|           | 3.34       | 2.88 3.49  | 1.85 3.01  | 2.79  | 0.28 | 0.65 | 0.76 | 0.22  | 0.23 | -0.28 - |
|           | 0.1        |            |            |       |      |      |      |       |      |         |
| GENE1591X | 14711_at   | 14711_at   | 1          | 2.78  | 1.47 | 1.33 | 3.61 | 0.83  | 2.28 |         |
|           | 0.52       | 2.16 0.5   | 0.64 1.67  | 1.15  | 1.25 | 1.35 | 1.88 | 1.13  | 1.28 | 2.93    |
|           | 3.69       | 3 4        | 1.76 3.6   | 3.5   | 1    | 1.3  | 0.75 | 0.37  | 0.07 | -0.25   |
|           | 0.05       |            |            |       |      |      |      |       |      |         |
| GENE1590X | 19946_at   | 19946_at   | 1          | 2.77  | 1.66 | 2.32 | 3.41 | 1.15  | 1.42 |         |
|           | 1.59       | 1.69 -0.26 | 0.16 0.95  | 0.65  | 0.99 | 1.04 | 1.67 | 0.48  | 0.63 | 2.69    |

|           |            |      |            |       |       |       |       |       |       |       |       |         |
|-----------|------------|------|------------|-------|-------|-------|-------|-------|-------|-------|-------|---------|
|           | 2.97       | 3.26 | 3.81       | 0.87  | 2.7   | 2.75  | 1.13  | -0.07 | 0.17  | 0.45  | 0.53  | -0.35   |
|           | 0.05       |      |            |       |       |       |       |       |       |       |       |         |
| GENE1656X | 12051_at   |      | 12051_at   | 1     | 1.61  | 1.29  | 1.95  | 1.86  | 1.57  | 1.91  |       |         |
|           | 1.23       | 1.26 | 0.65       | 0.41  | 0.96  | 0.84  | 0.94  | 0.57  | 1.39  | 0.07  | 0     | 1.7     |
|           | 2.17       | 2.55 | 2.2        | 2.08  | 2.42  | 2.25  | 0.73  | 0.56  | 0.05  | 0.76  | 0.36  | -0.32 - |
| 0.32      |            |      |            |       |       |       |       |       |       |       |       |         |
| GENE1655X | 18720_s_at |      | 18720_s_at | 1     | 1.27  | 1.06  | 1.03  | 1.49  | 1.14  | 1.94  |       |         |
|           | 0.21       | 0.73 | 0.29       | 0.26  | 0.51  | 0.59  | 0.31  | -0.28 | 1.22  | -0.28 | -0.37 | 1.57    |
|           | 1.82       | 2.06 | 2.22       | 1.4   | 1.97  | 1.45  | 0.8   | 0.26  | 1     | 0.23  | 0.87  | -0.02 - |
| 0.05      |            |      |            |       |       |       |       |       |       |       |       |         |
| GENE1588X | 15475_s_at |      | 15475_s_at | 1     | 0.09  | 0.08  | 1.11  | 1.16  | 0.37  | 0.98  |       |         |
|           | 0.21       | 0.61 | 0.54       | 0.73  | 0.78  | 0.4   | 0.44  | 0.58  | 1.31  | 0.18  | 0.42  | 1.29    |
|           | 1.6        | 1.45 | 1.51       | 0.69  | 1.53  | 1.39  | 1.01  | 0.7   | 0.6   | 0.26  | 0.25  | 0.42    |
| 0.23      |            |      |            |       |       |       |       |       |       |       |       |         |
| GENE1608X | 12958_at   |      | 12958_at   | 1     | 3.09  | 2.04  | 3.88  | 3.8   | 1.14  | 1.28  |       |         |
|           | 0.42       | 0.73 | 0.05       | 0.48  | 0.84  | 0.23  | 0.64  | 0.22  | 2.63  | 0.55  | 0.47  | 3       |
|           | 4.33       | 3.24 | 4.43       | 0.85  | 2.51  | 1.75  | 1.33  | 2.32  | 2.67  | 2     | 1     | 0.93    |
| 1.2       |            |      |            |       |       |       |       |       |       |       |       |         |
| GENE1607X | 20382_s_at |      | 20382_s_at | 1     | 1.39  | 1.26  | 2.19  | 2.95  | 0.57  | 0.82  |       |         |
|           | 0.4        | 0.04 | -0.32      | 1.36  | 1.11  | 0.74  | 0.54  | -0.37 | 1.53  | 0.09  | 0.11  | 1.77    |
|           | 2.63       | 1.85 | 2.2        | 0.5   | 1.17  | 1.07  | 0.46  | 1.05  | 1.02  | 0.48  | 0.87  | 0.11 -  |
| 0.05      |            |      |            |       |       |       |       |       |       |       |       |         |
| GENE1589X | 16568_s_at |      | 16568_s_at | 1     | 0.66  | 1.01  | 0.46  | 2.49  | 0.58  | 1.19  |       |         |
|           | 0.17       | 0.46 | 0.16       | 0.36  | 1.37  | 0.21  | 0.32  | 0.17  | 1.2   | 0.12  | 0.11  | 2.1     |
|           | 2.53       | 0.82 | 1.52       | 0.85  | 1.18  | 1.02  | 0.58  | 0.71  | 0.23  | -0.05 | -0.37 | -0.12 - |
| 0.04      |            |      |            |       |       |       |       |       |       |       |       |         |
| GENE1579X | 16393_s_at |      | 16393_s_at | 1     | 1.55  | 0.89  | 1.22  | 2.24  | 0.86  | 1.27  |       |         |
|           | 0.41       | 0.07 | 0.46       | 0.04  | 0.81  | -0.1  | 0.26  | -0.02 | 0.84  | 0.01  | 0.58  | 2.01    |
|           | 3.25       | 2.05 | 2.27       | 1.21  | 1.99  | 1.84  | 1.24  | 1.15  | 0.91  | 0.41  | 0.17  | 0.42    |
| 0.23      |            |      |            |       |       |       |       |       |       |       |       |         |
| GENE1578X | 13641_at   |      | 13641_at   | 1     | 1.07  | 0.56  | 0.64  | 1.47  | 0.61  | 0.92  |       |         |
|           | 0.42       | 0.28 | 0.47       | 0.31  | 1.38  | 0.33  | 0.25  | 0.21  | 0.91  | 0.54  | 0.69  | 2.12    |
|           | 3.19       | 1.7  | 2.11       | 1.18  | 1.37  | 1.71  | 1.03  | 0.6   | 0.11  | 0.38  | 0.34  | 0.04    |
| 0.13      |            |      |            |       |       |       |       |       |       |       |       |         |
| GENE1651X | 19423_at   |      | 19423_at   | 1     | 1.86  | 1.33  | 1.8   | 2     | 0.64  | 1.54  |       |         |
|           | 0.65       | 0.56 | 0.37       | -0.41 | -0.23 | -0.1  | 0.54  | 0.08  | 1.45  | 0.44  | 1.06  | 1.71    |
|           | 3.4        | 2.58 | 3.02       | 1.37  | 1.12  | 1.17  | -0.43 | 0.2   | 0.35  | 0     | 0     | -0.59 - |
| 0.13      |            |      |            |       |       |       |       |       |       |       |       |         |
| GENE1650X | 20017_at   |      | 20017_at   | 1     | 2.44  | 1.42  | 0.99  | 1.86  | 0.57  | 1.4   |       |         |
|           | 1.22       | 0.81 | 0.68       | 0.15  | 0.9   | 0.53  | 0.77  | 0.94  | 0.84  | 0.68  | 1.12  | 1.91    |
|           | 3.19       | 3.12 | 4.2        | 0.99  | 1.88  | 2.01  | 0.62  | -0.47 | -0.64 | 0.26  | 0.18  | -0.39 - |
| 0.68      |            |      |            |       |       |       |       |       |       |       |       |         |
| GENE1649X | 18672_s_at |      | 18672_s_at | 1     | 1.91  | 1.23  | 0.99  | 2.07  | 0.76  | 1.37  |       |         |
|           | 0.79       | 1.15 | 0.43       | -0.45 | 0.49  | 0.16  | 0.4   | 0.62  | 0.82  | 0.4   | 0.91  | 1.69    |
|           | 3.17       | 2.92 | 3.02       | 1.49  | 2.3   | 2.06  | 0.28  | -0.35 | 0.28  | -0.25 | -0.18 | -0.34   |
| 0.13      |            |      |            |       |       |       |       |       |       |       |       |         |
| GENE1648X | 19426_s_at |      | 19426_s_at | 1     | 1.01  | 1.11  | 0.65  | 1.47  | 0.08  | 1.02  |       |         |
|           | 0.63       | 0.74 | 0.07       | -0.76 | 0.15  | -0.02 | 0.18  | 0.38  | 0.59  | 0.27  | 0.76  | 1.21    |
|           | 2.43       | 1.85 | 2.18       | 0.84  | 1.58  | 1.72  | 0.56  | 0.09  | 0.09  | -0.07 | 0.13  | -0.32 - |
| 0.1       |            |      |            |       |       |       |       |       |       |       |       |         |
| GENE1647X | 18641_at   |      | 18641_at   | 1     | 0.62  | 1.68  | 0.13  | 1.32  | 0.02  | 1.45  |       |         |
|           | 0.6        | 0.81 | -0.53      | -0.32 | 0.77  | 0     | 0.88  | 0.16  | 0     | -0.21 | 0.17  | 1.51    |
|           | 2.54       | 1.7  | 1.45       | 0.37  | 1.35  | 1.66  | -0.1  | 0     | 0.32  | 0     | 0.58  | 0.13    |
| 0.2       |            |      |            |       |       |       |       |       |       |       |       |         |
| GENE1690X | 20620_g_at |      | 20620_g_at | 1     | 3.35  | 2.84  | 2.94  | 4.32  | 1.8   | 0.58  |       |         |
|           | 2.32       | 1.51 | -0.78      | -1.39 | 0     | 0.26  | 0.26  | 0.18  | -0.91 | 0.26  | 0.67  | 1.92    |

|           |            |       |            |       |       |       |       |       |       |       |       |       |       |
|-----------|------------|-------|------------|-------|-------|-------|-------|-------|-------|-------|-------|-------|-------|
|           | 3.96       | 3.37  | 5.17       | 2.88  | 3.91  | 3.77  | 1.29  | 2.17  | 2.17  | 1.58  | 1.32  | 0.5   |       |
|           | 0.09       |       |            |       |       |       |       |       |       |       |       |       |       |
| GENE1689X | 16134_at   |       | 16134_at   |       | 1     | 1.3   | 0.37  | 1.45  | 2.27  | 0.82  | 0.44  |       |       |
|           | 0.46       | 0.53  | -0.3       | -0.73 | 0.18  | -0.43 | -0.28 | -0.34 | 0.23  | -0.39 | 0.11  | 1.17  |       |
|           | 1.84       | 1.36  | 2.16       | 1.03  | 2.02  | 1.73  | 0.48  | 1.23  | 0.18  | 0.49  | 0.23  | -0.21 | -     |
|           | 0.18       |       |            |       |       |       |       |       |       |       |       |       |       |
| GENE1574X | 19230_at   |       | 19230_at   |       | 1     | 1.9   | 0.81  | 1.35  | 2.9   | 0.92  | 1.5   |       |       |
|           | 0.34       | 0.82  | 0.2        | 0.2   | 0.6   | 0.04  | 0.12  | 0.2   | 1.24  | -0.07 | -0.12 | 2.49  |       |
|           | 3.64       | 2.23  | 3.23       | 1.41  | 2.34  | 2.24  | 1.05  | 1.01  | 1.93  | 1.36  | 0.91  | 0.27  | -     |
|           | 0.25       |       |            |       |       |       |       |       |       |       |       |       |       |
| GENE1573X | 13270_at   |       | 13270_at   |       | 1     | 1.71  | 0.56  | 1.74  | 2.31  | 0.35  | 0.71  |       |       |
|           | 0.13       | 0.47  | -0.39      | -0.2  | -0.08 | 0     | 0.07  | -0.1  | 0.57  | 0.01  | 0.05  | 1.93  |       |
|           | 3.05       | 2.42  | 3.26       | 0.91  | 2.58  | 2.12  | 1.07  | 1.28  | 1.68  | 1.09  | 1.03  | 0.53  |       |
|           | 0.34       |       |            |       |       |       |       |       |       |       |       |       |       |
| GENE1572X | 13271_g_at |       | 13271_g_at |       | 1     | 1.72  | 0.89  | 1.81  | 1.94  | 0.59  | 0.88  |       |       |
|           | 0.12       | 0.47  | -0.3       | 0.66  | 0.4   | 0.21  | 0.2   | -0.26 | 1.26  | 0     | -0.25 | 1.32  |       |
|           | 2.54       | 2.37  | 2.8        | 1.5   | 2.68  | 2.17  | 0.89  | 0.43  | 1.02  | 0.42  | 0.34  | 0.27  |       |
|           | 0.23       |       |            |       |       |       |       |       |       |       |       |       |       |
| GENE1583X | 12094_at   |       | 12094_at   |       | 1     | 2.97  | 1.21  | 1.09  | 3.76  | 0.32  | 0.28  |       |       |
|           | 2.35       | 2.07  | -0.37      | -0.81 | 0.84  | -0.94 | -0.25 | 1.53  | 0.65  | 0.15  | 1.41  | 3.13  |       |
|           | 3.67       | 4.97  | 5.29       | 1.52  | 5.37  | 5.08  | 1.58  | 1.18  | 1.36  | 1.65  | 0     | 0.58  | -     |
|           | 0.68       |       |            |       |       |       |       |       |       |       |       |       |       |
| GENE1571X | 17381_at   |       | 17381_at   |       | 1     | 1.47  | 0.15  | 0.77  | 1.68  | 0.26  | 0.44  |       |       |
|           | 0.15       | 0.5   | -0.18      | -0.01 | 0.63  | 0.07  | 0.25  | 0.01  | 0.57  | 0.58  | 0.44  | 1.32  |       |
|           | 1.32       | 1.11  | 1.84       | 0.71  | 2.07  | 1.75  | 0.45  | 0.28  | 0.87  | 0.22  | 0.25  | -0.23 | -     |
|           | 0.18       |       |            |       |       |       |       |       |       |       |       |       |       |
| GENE1575X | 18167_s_at |       | 18167_s_at |       | 1     | 2.68  | 0.91  | 1.03  | 2.59  | 0.13  | 0.36  |       |       |
|           | 0.57       | -0.04 | -1         | -0.32 | 0.33  | 0.17  | 0.35  | -0.51 | 0.52  | 0.25  | 0.21  | 1.79  | 3.39  |
|           | 3.04       | 3.07  | 0.77       | 2     | 1.85  | 0.05  | -0.04 | 0.84  | 0     | 0.29  | 0.16  | 0.62  |       |
| GENE1576X | 14608_at   |       | 14608_at   |       | 1     | 1.6   | 0.17  | 0.44  | 1.98  | -0.04 | 0.64  |       |       |
|           | 0.2        | 0.04  | -0.12      | -0.2  | 0.44  | -0.15 | -0.01 | -0.45 | 0.53  | 0.02  | 0.64  | 1.63  | 2.42  |
|           | 2.26       | 2.77  | 0.87       | 2.11  | 1.95  | 0.84  | 1.05  | 0.36  | 0.84  | 0.73  | 0.26  | 0.02  |       |
| GENE1570X | 15143_s_at |       | 15143_s_at |       | 1     | 1.36  | 0.11  | 0.63  | 1     | -0.01 | 0.64  |       |       |
|           | 0.16       | 0.25  | -0.07      | -0.26 | 0.28  | 0.02  | 0.2   | -0.13 | 0.6   | 0.28  | 0.65  | 1.2   | 1.83  |
|           | 0.98       | 1.62  | 0.67       | 1.36  | 1.45  | 0.55  | 0.45  | -0.07 | 0.21  | 0.12  | 0.11  | 0     |       |
| GENE1581X | 12642_at   |       | 12642_at   |       | 1     | 2.24  | 1.58  | 1.79  | 5.27  | 1.14  | 1.22  |       |       |
|           | 1.59       | 1.4   | 0.01       | -1.51 | 2     | 0.32  | 0.64  | 0.38  | -0.21 | 0.15  | 0.8   | 4.24  |       |
|           | 5.56       | 3.37  | 5.61       | 1.88  | 3.51  | 3.02  | 1.62  | 1.88  | 1.53  | 1.58  | 1.18  | -0.15 | -     |
|           | 0.26       |       |            |       |       |       |       |       |       |       |       |       |       |
| GENE1580X | 19182_at   |       | 19182_at   |       | 1     | 3.14  | 0.91  | 1.53  | 5.12  | 0.82  | 1.45  |       |       |
|           | 0.9        | 1.05  | 0.85       | -0.3  | 3.43  | 0.37  | 1     | 0.88  | 1.09  | 1.72  | 2.07  | 5.26  |       |
|           | 5.81       | 3.04  | 4.52       | 1.84  | 2.88  | 2.67  | 1.51  | 2.17  | 2.72  | 2.14  | 1.41  | 0.82  |       |
|           | 0.32       |       |            |       |       |       |       |       |       |       |       |       |       |
| GENE1577X | 19247_at   |       | 19247_at   |       | 1     | 2.51  | 0.8   | -0.3  | 3.42  | 0.65  | 2.12  |       |       |
|           | 0.62       | 1.43  | 0.29       | -0.73 | 1.18  | -0.55 | 0.21  | 0.46  | 0     | 0.17  | 0.91  | 3.19  |       |
|           | 5.96       | 3.75  | 5.3        | 2     | 2.65  | 2.74  | 1.62  | 1.7   | 2.53  | 1.67  | 1.58  | 1.42  |       |
|           | 1.5        |       |            |       |       |       |       |       |       |       |       |       |       |
| GENE2194X | 18357_at   |       | 18357_at   |       | 1     | 2.2   | 1.13  | 0     | 0     | 2.48  | 3.13  |       |       |
|           | 2.53       | 3.35  | 1.48       | 0     | 0     | 0     | 0     | 2.48  | 0     | 0     | 0     | 0     | 0     |
|           | 0.48       | 0     | 2.43       | 1.58  | 1.76  | 1     | 0     | 0     | 0     | 0     | 0     | 0.67  |       |
| GENE2193X | 14635_s_at |       | 14635_s_at |       | 1     | 1.26  | 6.14  | 1     | 0     | 3.48  | 5.27  |       |       |
|           | 3.39       | 4.48  | 4.73       | 0.26  | 0     | 2.26  | 1.67  | 3.35  | 0     | 0     | 0     | 0     | 0     |
|           | 0          | 0     | 2.56       | 3.45  | 1.58  | 3.98  | 0     | 0     | 0     | 0     | 0     | 0     | 0     |
| GENE2192X | 15001_at   |       | 15001_at   |       | 1     | 0.6   | 1.09  | 0.31  | 0.53  | 1.26  | 1.79  |       |       |
|           | 1.2        | 1.23  | 1          | 0     | 0.05  | 0.6   | 0.6   | 0.8   | 0     | 0     | 0.05  | 0.34  | -     |
|           | 0.21       | -0.1  | -0.57      | 0.95  | 0.42  | 0.51  | 0.47  | 0.11  | -0.35 | -0.23 | 0.04  | -0.34 | -0.21 |

|           |            |            |       |       |       |       |       |       |       |       |       |       |       |
|-----------|------------|------------|-------|-------|-------|-------|-------|-------|-------|-------|-------|-------|-------|
| GENE2191X | 13097_at   | 13097_at   | 1     | 0.42  | 0.73  | 0.68  | -0.05 | 0.54  | 1.19  |       |       |       |       |
|           | 0.73       | 1.29       | 0.61  | 0.15  | 0.11  | 0.31  | 0.32  | 0.55  | -0.07 | 0.07  | 0.37  | 0.16  | -     |
|           | 0.13       | 0.02       | -0.1  | 0.76  | 0.2   | 0.13  | 0.25  | -0.28 | -0.28 | 0.11  | 0.09  | -0.3  | -0.04 |
| GENE2190X | 15795_g_at | 15795_g_at | 1     | 1.01  | 0.91  | 0.33  | 0.34  | 1.74  | 2.12  |       |       |       |       |
|           | 0.26       | 0.73       | 1.55  | -0.04 | -0.02 | 0.28  | 0.28  | 0.28  | -0.04 | 0.4   | 0.56  | 0     | -     |
|           | 0.32       | 0.27       | 0.56  | 1.77  | 0.35  | 0.45  | 0.79  | -0.35 | 0.91  | 0.02  | 0.41  | -0.21 | 0.04  |
| GENE2189X | 18286_at   | 18286_at   | 1     | 0.21  | 0.72  | 0.18  | 0.01  | 0.9   | 1.07  |       |       |       |       |
|           | 0.53       | 0.41       | 0.78  | -0.1  | 0.17  | 0.34  | 0.32  | 0.2   | 0.11  | 0.33  | 0.45  | 0.16  | -     |
|           | 0.13       | 0.13       | 0.18  | 0.77  | 0.13  | 0.18  | 0.28  | -0.05 | 0     | 0.36  | 0.29  | -0.16 | 0.05  |
| GENE2183X | 18282_at   | 18282_at   | 1     | 1.7   | 0.72  | 0     | 0.79  | 2.35  | 2.07  |       |       |       |       |
|           | 0.51       | 0.93       | 1.84  | 0.17  | 0.94  | -0.73 | 0.75  | 0.47  | -0.73 | 0.51  | 1.17  | 0.41  | -     |
|           | 1.59       | -0.28      | -0.45 | 0.13  | 0.63  | 0.37  | 0.2   | 0.47  | -0.25 | 0.44  | 0.38  | 0.15  | -0.37 |
| GENE2182X | 15034_at   | 15034_at   | 1     | 0.4   | 0.23  | -0.32 | 0.4   | 0.96  | 1.63  |       |       |       |       |
|           | 0.64       | 0.89       | 0.69  | -0.39 | 0.23  | 0.37  | 0.59  | 0.44  | -0.32 | 0.4   | 0.43  | 0.08  | -     |
|           | 0.45       | -0.13      | 0.04  | 0.5   | 0.41  | -0.02 | 0.09  | 0.38  | -0.34 | 0.31  | 0.38  | -0.13 | 0.26  |
| GENE1785X | 20059_at   | 20059_at   | 1     | 1.27  | 1.5   | 1.65  | 0.58  | 2.42  | 2.2   |       |       |       |       |
|           | 1.45       | 1.36       | 1.24  | -0.81 | -0.49 | -0.13 | 0.41  | -0.59 | 0.18  | -0.49 | 0.43  | -0.23 |       |
|           | 0.09       | 0.34       | 0     | 1.9   | 1.48  | 1.37  | 1.58  | 2.26  | -0.12 | -0.12 | 0.27  | 0.34  | 0     |
| GENE1784X | 12229_at   | 12229_at   | 1     | 0.72  | 1.01  | 0.12  | 0.75  | 1.22  | 1.17  |       |       |       |       |
|           | 0.34       | 0.34       | 0.85  | -0.18 | -0.12 | -0.23 | 0.43  | -0.41 | 0.09  | 0.02  | -0.16 | -0.43 |       |
|           | 0.35       | 0.02       | 0.11  | 1     | 1.16  | 0.69  | 0.74  | 0.76  | -0.86 | -0.13 | -0.2  | 0.02  |       |
|           | 0.05       |            |       |       |       |       |       |       |       |       |       |       |       |
| GENE1783X | 19155_s_at | 19155_s_at | 1     | 0.17  | 0.13  | 0.84  | 0.58  | 1.36  | 0.81  |       |       |       |       |
|           | 0.21       | -0.05      | 0.65  | -0.53 | -0.39 | 0.09  | 0.32  | -0.05 | -0.18 | -0.66 | 0.02  | -0.04 | -     |
|           | 0.28       | 0.02       | -0.32 | 0.92  | 0.59  | 0.56  | 0.56  | 0.47  | -0.73 | -0.15 | -0.41 | 0.02  | -0.04 |
| GENE1782X | 17766_at   | 17766_at   | 1     | 0.31  | 0.33  | 0     | 0.04  | 1.04  | 0.96  |       |       |       |       |
|           | 0.45       | 0.25       | 0.32  | -0.59 | -0.37 | -0.39 | -0.21 | 0.09  | -0.2  | -0.55 | 0.13  | -0.15 |       |
|           | 0.01       | 0.26       | 0.22  | 1.02  | 0.32  | 0.29  | 0.51  | 0.16  | 0.11  | 0.25  | 0.56  | 0.02  |       |
|           | 0.16       |            |       |       |       |       |       |       |       |       |       |       |       |
| GENE1781X | 12262_at   | 12262_at   | 1     | 0.82  | 0.61  | 0.01  | -0.08 | 1     | 1.59  |       |       |       |       |
|           | 0.31       | 0.79       | 0.62  | -0.35 | -0.68 | -1.51 | -0.1  | 0     | 0.02  | -0.76 | -0.32 | -0.39 | -     |
|           | 0.08       | 0.11       | -0.15 | 1.08  | 0.43  | 0.44  | 0.65  | 0.15  | -0.78 | -0.15 | -0.15 | -0.16 | -0.12 |
| GENE2420X | 14923_at   | 14923_at   | 1     | 2.35  | 1.53  | 1.37  | 1.52  | 2.06  | 1.52  |       |       |       |       |
|           | 1.37       | 0.77       | 0.27  | -1.12 | -0.32 | -0.91 | 0.27  | 0.18  | -0.32 | 0.76  | 0.76  | 0.32  | -     |
|           | 0.28       | -0.23      | -0.35 | 0.5   | -0.35 | 0.08  | 0.18  | 0.17  | -0.43 | -0.08 | -0.32 | -0.62 | -0.26 |
| GENE2181X | 14627_i_at | 14627_i_at | 1     | 0.97  | 0.11  | 0.99  | 0.66  | 1.09  | 1.31  |       |       |       |       |
|           | 0.77       | 1.51       | 0.15  | -1.02 | -0.64 | -0.57 | 0.09  | 0.2   | -0.23 | 0.2   | 0.74  | 0.26  | -     |
|           | 0.07       | -0.53      | -0.51 | 0.31  | 0.67  | 0.61  | 0.65  | 0.08  | -0.25 | 0.09  | -0.3  | -0.08 | -0.3  |
| GENE1425X | 19708_at   | 19708_at   | 1     | 1.31  | 0.16  | -0.04 | 0.26  | 1.17  | 0.97  |       |       |       |       |
|           | 0.13       | -0.15      | -0.02 | -0.53 | -0.39 | -0.34 | -0.2  | -0.47 | 0.01  | 0.2   | 0.54  | -0.1  | -     |
|           | 0.04       | 0.29       | -0.08 | 0.32  | -0.08 | -0.02 | 0.13  | 0.01  | 0.12  | 0.08  | 0.01  | 0.05  | 0.17  |
| GENE1424X | 14007_at   | 14007_at   | 1     | 0.66  | 0.15  | -0.26 | 0.27  | 0.47  | 1.04  |       |       |       |       |
|           | 0.17       | 0.45       | -0.16 | -0.32 | 0.08  | -0.23 | 0.21  | 0.32  | -0.15 | 0.13  | 0.31  | 0.23  |       |
|           | 0.5        | 0.31       | -0.15 | 0.13  | 0.13  | -0.1  | 0.08  | 0.65  | 0.26  | 0.16  | -0.15 | 0.22  |       |
|           | 0.12       |            |       |       |       |       |       |       |       |       |       |       |       |
| GENE1864X | 14412_at   | 14412_at   | 1     | 0.45  | 0.26  | -0.55 | 0.18  | 0.64  | 1.21  |       |       |       | -     |
|           | 0.57       | 0.4        | 0.26  | 0.21  | 0.02  | 0.69  | 0.53  | 0.09  | 0.74  | 0.35  | 0.26  | 0.22  | -0.39 |
|           | 0.18       | 0.28       | 0.21  | -0.39 | 0.11  | 0.22  | 0.34  | -0.55 | 0.41  | 0.02  | 0.27  | 0.59  |       |
| GENE1863X | 17139_at   | 17139_at   | 1     | 0.41  | 0.38  | -0.05 | 0.15  | 0.49  | 1.49  |       |       |       | -     |
|           | 0.25       | 0.54       | 0.38  | 0.2   | 0.15  | 0.49  | 0.49  | 0.45  | 0.41  | 0.33  | 0.61  | 0.02  | -0.26 |
|           | 0.02       | -0.08      | 0.13  | -0.3  | -0.05 | -0.05 | 0.65  | -0.37 | 0.02  | 0.07  | -0.55 | 0.2   |       |
| GENE1427X | 12000_at   | 12000_at   | 1     | 1.01  | 0.37  | -0.88 | -0.68 | 1.18  | 2     |       |       |       | -     |
|           | 0.21       | 0.05       | 1.28  | -0.94 | -0.07 | 0.16  | 0.4   | -0.04 | -0.45 | 0.35  | 0.87  | 0.26  | -0.04 |
|           | 0.69       | 0.38       | 1.22  | 0.55  | 0.65  | 0.71  | -0.43 | -1.35 | 0.09  | 0.2   | -0.37 | 0.07  |       |
| GENE1426X | 12666_at   | 12666_at   | 1     | 0.89  | 0.23  | -0.21 | 0.07  | 0.52  | 1.01  |       |       |       | -     |
|           | 0.04       | 0          | 0.54  | 0.28  | 0.2   | 0.74  | 0.36  | 0.29  | 0.12  | 0.25  | 0.68  | 0.57  | 0.6   |
|           | 0.46       | 0.28       | 0.54  | 0.17  | 0.21  | -0.15 | 0.17  | -0.94 | 0.45  | 0.48  | -0.05 | -0.41 |       |



|           |            |            |       |       |       |       |       |       |       |       |       |       |      |
|-----------|------------|------------|-------|-------|-------|-------|-------|-------|-------|-------|-------|-------|------|
| GENE1882X | 14592_at   | 14592_at   | 1     | 1.17  | 0.02  | 2.7   | 1.02  | 1.36  | 1.26  |       |       |       |      |
|           | 0.42       | 0.16       | 1     | 1.8   | 0.91  | 0.42  | 0.85  | 0.35  | 2.14  | 1     | 0.86  | 1.05  |      |
|           | 1.18       | -0.15      | 0.58  | 1.09  | 0.94  | 0.84  | 0.8   | 1.28  | -0.3  | 0.58  | 0.09  | -0.02 |      |
|           | 0.04       |            |       |       |       |       |       |       |       |       |       |       |      |
| GENE1881X | 12730_f_at | 12730_f_at | 1     | 1.45  | -0.32 | 3.26  | 2.07  | 1.11  | 0.63  |       |       |       |      |
|           | 0.4        | 1.11       | 0.86  | 4.12  | 2.88  | 0.22  | 0.49  | 1.57  | 3.4   | 1.17  | 0.96  | 1.67  |      |
|           | 1.26       | 1.63       | 1.26  | 0.13  | 3.23  | 3.51  | 2.8   | 3.13  | 0.48  | 1.92  | 0     | 2.18  |      |
|           | 0.91       |            |       |       |       |       |       |       |       |       |       |       |      |
| GENE1880X | 14472_at   | 14472_at   | 1     | 0.32  | -0.41 | 0.84  | 0     | 0.2   | -0.1  | -     |       |       |      |
|           | 0.55       | -1.15      | 0.78  | 2     | 1.32  | 0.42  | 0.38  | 0.44  | 1.48  | 0.47  | 0.8   | 1.22  | 0.65 |
|           | 0.48       | 0.52       | 0.75  |       | 0.86  | 1.07  | 0.84  | 0.58  | 0.21  | 0.52  | 0.68  | 0.15  | 0.23 |
| GENE1508X | 11998_at   | 11998_at   | 1     | 0.83  | 0.21  | 0.37  | 0.73  | 1.06  | -0.32 | -     |       |       |      |
|           | 1.59       | -1.88      | 0.83  | 0.79  | 0.23  | 0.54  | 0.18  | -1.02 | 0.5   | 0.69  | 0.71  | 0.01  | 0.08 |
|           | 0.2        | 0.54       | 0.67  | 1.02  | 1.11  | 0.86  | 0.15  | -0.62 | 0.74  | 0.38  | -0.04 | 0.23  |      |
| GENE1861X | 15241_s_at | 15241_s_at | 1     | -0.12 | -0.21 | -0.35 | -0.62 | 0.77  | 1.21  | 0     |       |       |      |
|           | 0.18       | 1.07       | 0.83  | 0.33  | 0.31  | 0.97  | 0.26  | 0.38  | 0.4   | 0.44  | 0.05  | 0.22  | 0    |
|           | 0          | 1.21       | -0.78 | -0.86 | 0.34  | 0.23  | 0.55  | 0.05  | 0.41  | 0.11  | 0     |       |      |
| GENE1860X | 15536_at   | 15536_at   | 1     | -0.91 | 0.23  | 0.44  | -0.05 | 0.76  | 1.22  | -     |       |       |      |
|           | 0.45       | 0.44       | 0.87  | 0.96  | 0.36  | 0.69  | 0.61  | 0.42  | 0.78  | 0.54  | 0.45  | 0.09  | 0.56 |
|           | 0.59       | -0.55      | 0.79  | -0.73 | -0.81 | 0.2   | 0.58  | 0.26  | 0.48  | 0.4   | 0.13  | 0     |      |
| GENE1501X | 14518_at   | 14518_at   | 1     | -1.35 | -0.45 | -0.16 | 0.11  | 1.11  | 1     | -     |       |       |      |
|           | 0.62       | -0.37      | 1.05  | 1.21  | 0.29  | 0.56  | 0.38  | 0.08  | 0.87  | 0     | -0.66 | 0.78  | 0.5  |
|           | 0.29       | 0.07       | 1.49  | 0.69  | 0.54  | 0.66  | 0.52  | -0.13 | -0.3  | 0.05  | 0.7   | 0.21  |      |
| GENE1500X | 16786_at   | 16786_at   | 1     | -0.45 | -0.15 | -0.15 | -0.28 | 1.04  | 0.84  | 0     |       |       |      |
|           | -0.1       | 1.02       | 0.64  | 0.53  | 0.43  | 0.44  | 0.41  | 0.68  | 0.12  | 0.18  | 0.16  | -0.2  |      |
|           | 0.15       | -0.23      | 0.82  | 0.53  | 0.53  | 0.71  | 0.71  | -0.16 | 0.07  | -0.15 | 0.27  | 0.08  |      |
| GENE1504X | 16615_s_at | 16615_s_at | 1     | -5.05 | -1.55 | -1.78 | -2.25 | 1.92  | 2.13  |       |       |       |      |
|           | 0.09       | -0.12      | 4.18  | -1.78 | -0.28 | -2.55 | -0.78 | -0.81 | -1.78 | -2.05 | -0.76 | 0.64  |      |
|           | 1.37       | 0.08       | 0.69  | 4.42  | 1.67  | 1.89  | 1.96  | 4.21  | 0.85  | 1.96  | -0.04 | 0.6   |      |
|           | 0.71       |            |       |       |       |       |       |       |       |       |       |       |      |
| GENE1503X | 20698_at   | 20698_at   | 1     | -2.73 | -1.78 | 0     | 0     | 0     | 0     | 1     |       |       |      |
|           | 0.48       | 1.13       | 0     | 0     | -1.78 | -1.78 | 0     | 0     | -2.73 | -2.73 | 0     | 2     | 0    |
|           | -0.62      | 4.23       | 0.86  | 1.76  | 2.15  | 1.96  | -2    | 0.01  | -0.71 | -0.55 | -1.83 |       |      |
| GENE1499X | 12544_at   | 12544_at   | 1     | 0.29  | 0     | -1.15 | -1.15 | 0.84  | 2.13  | 0     |       |       |      |
|           | 1.13       | 1.84       | -1.15 | 0.53  | 0     | 0     | 1.26  | -0.47 | 0.2   | 0.61  | 0.92  | 1.86  |      |
|           | 0.66       | 0          | 2     | 1.3   | 1.47  | 0.67  | 2.14  | -0.26 | -0.18 | -0.28 | -0.25 | -0.15 |      |
| GENE1498X | 20199_at   | 20199_at   | 1     | -0.49 | -0.25 | -0.3  | -0.88 | -0.47 | 0.37  |       |       |       |      |
|           | 0.11       | 0.46       | 0.78  | 0.36  | 0.17  | 0     | 0.37  | 0.58  | 0.55  | -0.35 | 0     | 1.03  |      |
|           | 1.35       | 0.01       | 0.72  | 0.78  | 1.13  | 1.27  | 0.26  | 0.97  | -0.62 | 0.72  | 0.63  | 0.2   |      |
|           | 0.57       |            |       |       |       |       |       |       |       |       |       |       |      |
| GENE1791X | 17182_at   | 17182_at   | 1     | -0.47 | -0.25 | 0.46  | 0.13  | 0.9   | 1.22  | -     |       |       |      |
|           | 0.68       | 0.2        | 0.75  | -0.39 | 0     | -0.73 | -0.28 | -0.34 | -0.45 | -0.37 | -0.37 | -0.57 | 0.52 |
|           | 0.2        | -0.32      | 0.92  | -0.1  | 0.48  | 0.22  | 0.64  | 0.05  | 0.17  | 0.2   | 0.54  | 0.22  |      |
| GENE1306X | 18751_f_at | 18751_f_at | 1     | -0.35 | -0.68 | -0.07 | -0.15 | 2.13  | 1.67  | -     |       |       |      |
|           | 2.25       | -1.55      | 2.32  | -1    | -2.18 | -2.55 | -2.32 | -1.83 | -2.32 | -1.32 | -0.53 | -0.15 | 1.29 |
|           | 0.51       | 0.48       | 2.8   | 3.17  | 3.62  | 3.14  | 1.68  | 1.32  | 0.62  | 0.12  | 1.32  | 0.51  |      |
| GENE1305X | 15638_s_at | 15638_s_at | 1     | -0.41 | -0.37 | -0.91 | -0.94 | 1.32  | 1.11  | -     |       |       |      |
|           | 1.47       | -1.59      | 1.41  | -1.12 | -0.81 | -1.05 | -0.57 | -1.32 | -1.28 | -0.23 | -0.16 | -0.04 | 0.67 |
|           | 1.37       | 0.08       | 2.14  | 0.91  | 1.5   | 1     | 1.85  | 1.02  | 0.59  | 0.25  | 1.45  | 1.04  |      |
| GENE1304X | 19577_at   | 19577_at   | 1     | 0.25  | -0.39 | -1    | -0.49 | 2     | 0.41  | -     |       |       |      |
|           | 1.51       | -2.55      | 1.41  | -1    | 0     | -2.32 | -1.83 | -2.55 | -1    | 0.29  | 0.79  | 0.71  | 2.71 |
|           | 1.18       | 0.07       | 3.87  | 1.03  | 0.98  | 1.19  | 2.75  | -0.62 | -0.28 | -0.25 | 0.51  | 0.08  |      |
| GENE1303X | 16909_at   | 16909_at   | 1     | -0.55 | -0.88 | -0.1  | -0.1  | 1.18  | 1.05  | -     |       |       |      |
|           | 0.94       | -1.83      | 0.5   | -1.32 | 0.04  | -0.71 | -0.51 | -1.51 | -0.62 | -0.1  | 0.08  | 0.22  | 0.26 |
|           | 0.42       | 0.13       | 2.17  | 1.02  | 0.92  | 0.86  | 0.62  | -0.23 | 0.11  | 0.05  | 0.08  | -0.07 |      |

|           |            |            |       |       |       |       |      |       |       |       |       |       |   |
|-----------|------------|------------|-------|-------|-------|-------|------|-------|-------|-------|-------|-------|---|
| GENE2577X | 19451_at   | 19451_at   | 1     | 3.4   | 4.51  | 5.26  | 5.79 | 5.71  | 4.97  |       |       |       |   |
|           | 6.68       | 7          | 0     | -1.94 | 0     | 1     | 2.96 | 3.88  | 3.25  | 0     | 0     | 2.32  | 0 |
|           | 0.26       | 2.53       | 0     | 1.48  | 1.48  | 0.26  | 0    | 0     | 0     | 0     | 0     | 0     |   |
| GENE2576X | 20356_at   | 20356_at   | 1     | 6.07  | 5.44  | 4.56  | 5.91 | 4.56  | 3.61  |       |       |       |   |
|           | 5.56       | 5.76       | 0.35  | -0.91 | 0.84  | 1.92  | 3    | 3.07  | 1.97  | 0     | 0.26  | 2.13  | 0 |
|           | 0.84       | 2.53       | -0.23 | 2     | 0     | 0     | 0    | 0     | 0     | 0     | 0     | 0.26  |   |
| GENE2575X | 16701_at   | 16701_at   | 1     | 3     | 3.35  | 2.63  | 3.48 | 3.63  | 3.56  |       |       |       |   |
|           | 3.1        | 4.75       | 0.84  | 0     | 0     | 0.67  | 1.26 | 2.26  | 1.67  | 0     | 0     | 0     | 0 |
|           | 0.67       | 1.58       | 0     | 1.26  | 0     | 0     | 0    | 0     | 0     | 0     | 0     | 0     | 0 |
| GENE2574X | 13351_at   | 13351_at   | 1     | 1.92  | 3.82  | 3.53  | 2.72 | 2.43  | 2.48  |       |       |       |   |
|           | 3.1        | 3.48       | 0.48  | 0     | 0     | 0     | 1    | 1.67  | 1.67  | 0     | 0     | 0     |   |
|           | 0.84       | 0.26       | 1.58  | 0     | 0.48  | 0     | 0    | 0     | 0     | 0     | 0     | 0.48  | 0 |
| GENE2573X | 12989_at   | 12989_at   | 1     | 7.73  | 7.31  | 5.4   | 8.02 | 4.05  | 3.57  |       |       |       |   |
|           | 7.29       | 7.94       | -0.86 | 0.65  | 0     | 3.53  | 4.53 | 4.52  | 3.92  | 0     | 0.67  | 4.43  |   |
|           | 3.65       | 1.48       | 3.78  | -0.91 | 3.6   | 2.96  | 0    | 0     | 0     | 0     | 0     | 0     | 0 |
| GENE2572X | 20421_at   | 20421_at   | 1     | 5.39  | 4.74  | 4.88  | 5.36 | 2.56  | 5.19  |       |       |       |   |
|           | 4.11       | 5.36       | -0.32 | -0.26 | 0     | 0.26  | 2.32 | 1.5   | 3.77  | 0     | 1.13  | 3.35  |   |
|           | 1.48       | 1.58       | 0     | 0.63  | 1.76  | 2.2   | 0    | 0     | 0     | 0     | 0.26  | 0     | 0 |
| GENE2571X | 15120_at   | 15120_at   | 1     | 4.86  | 3.72  | 3.4   | 3.37 | 2.34  | 4.27  |       |       |       |   |
|           | 4.03       | 5.54       | 0.65  | 0     | 0     | 1     | 2.26 | 2.88  | 3.07  | 0     | 1.48  | 2.07  |   |
|           | 2.37       | 3.48       | 2.48  | 1.5   | 1.58  | 2.07  | 0.48 | 0     | 0     | 0     | 0     | 0     | 0 |
| GENE2570X | 19677_at   | 19677_at   | 1     | 0.65  | 1.08  | 0.79  | 0.97 | 0.71  | 1     |       |       |       |   |
|           | 1.25       | 1.25       | 0.36  | -0.02 | 0.2   | 0.37  | 0.43 | 0.71  | 0.35  | 0.09  | 0.31  | 0.21  |   |
|           | 0.23       | 0.83       | 0.32  | 0.37  | 0.23  | 0.2   | 0.13 | -0.15 | 0     | -0.08 | -0.05 | -0.26 | - |
| 0.01      |            |            |       |       |       |       |      |       |       |       |       |       |   |
| GENE2477X | 20269_at   | 20269_at   | 1     | 4.67  | 5.18  | 4.97  | 5.93 | 4.18  | 4.33  |       |       |       |   |
|           | 5.3        | 5.29       | 1.81  | 0.46  | 0     | 2.26  | 3.41 | 3.31  | 2.42  | 0.15  | 0.95  | 2.52  |   |
|           | 3.83       | 2.17       | 2.23  | 2.23  | 4.45  | 4.16  | 3.74 | 0.22  | 0.12  | 1.06  | 0.44  | 1.26  | 1 |
| GENE2476X | 14609_at   | 14609_at   | 1     | 5.37  | 4.92  | 3.33  | 6.03 | 4.69  | 3.71  |       |       |       |   |
|           | 4.94       | 4.68       | 1.69  | -1    | 0.73  | 2.32  | 2.22 | 2.2   | 1.37  | 0.5   | 0     | 3.67  |   |
|           | 2.61       | 0.92       | 3.22  | 2.05  | 4     | 2.96  | 1.58 | 1.26  | 0.73  | 0.21  | 1     | 0.34  |   |
|           | 0.53       |            |       |       |       |       |      |       |       |       |       |       |   |
| GENE2475X | 13656_at   | 13656_at   | 1     | 5.13  | 4.8   | 3.87  | 6.13 | 3.55  | 3.08  |       |       |       |   |
|           | 4.09       | 4.46       | 0.22  | -0.73 | 0.45  | 0.88  | 1.91 | 1.48  | 1.99  | -0.1  | 0.63  | 3.44  |   |
|           | 4.28       | 1.06       | 2.31  | 1.53  | 3.81  | 3.47  | 2    | 0.91  | 0.21  | 0.23  | 0.04  | 0.09  | - |
| 0.34      |            |            |       |       |       |       |      |       |       |       |       |       |   |
| GENE2474X | 13818_s_at | 13818_s_at | 1     | 4.72  | 4.81  | 1.86  | 3.76 | 2.48  | 3.7   |       |       |       |   |
|           | 2.2        | 4.02       | 1.22  | -0.39 | 0     | 1     | 1.37 | 2.03  | 2.1   | 0.26  | 0     | 2.72  |   |
|           | 3.35       | 1          | 0.84  | 1.15  | 2.2   | 2     | 1.92 | 0     | 0.26  | 0     | 0     | 0     |   |
|           | 0.48       |            |       |       |       |       |      |       |       |       |       |       |   |
| GENE2206X | 16003_s_at | 16003_s_at | 1     | 1.76  | 1.82  | 1.65  | 2.4  | 2.19  | 2.42  |       |       |       |   |
|           | 2.03       | 2.34       | 0.68  | -2    | 0.36  | -0.04 | 0.26 | 1.07  | 1.18  | -0.13 | 0.02  | 1.07  |   |
|           | 1.93       | 0.09       | 0.54  | 1.41  | 1.17  | 1.17  | 0.97 | 0.55  | 0.26  | 0.32  | 0.02  | 0.17  |   |
|           | 0.13       |            |       |       |       |       |      |       |       |       |       |       |   |
| GENE2205X | 20529_at   | 20529_at   | 1     | 1.8   | 1.55  | 1.44  | 1.7  | 1.65  | 2.1   |       |       |       |   |
|           | 1.35       | 1.92       | 0.73  | -0.18 | 0.34  | 0.23  | 0.32 | 0.68  | 0.86  | 0.08  | -0.3  | 0.52  |   |
|           | 0.92       | 0.37       | 0.48  | 0.74  | 0.78  | 0.73  | 0.25 | 0.63  | -0.76 | -0.26 | -0.45 | 0.04  | - |
| 0.53      |            |            |       |       |       |       |      |       |       |       |       |       |   |
| GENE2600X | 18194_i_at | 18194_i_at | 1     | 3.37  | 3.4   | 3.32  | 2.8  | 4.48  | 3.37  |       |       |       |   |
|           | 4.57       | 4.68       | 1.84  | 0     | 0     | 0     | 0    | 2.13  | 0     | 0     | 0     | 0     |   |
|           | 1.37       | 0          | 0     | 3.48  | 2.88  | 1.58  | 1.48 | 0     | 0     | 0     | 0     | 0     | 0 |
| GENE2599X | 13627_at   | 13627_at   | 1     | 3.35  | 3.13  | 4.71  | 3.29 | 3.8   | 3.94  |       |       |       |   |
|           | 4.66       | 5.54       | 1.76  | 0     | 0     | 0     | 0    | 3.13  | 2.72  | 0     | 0     | 1.84  |   |
|           | 2.07       | 0          | 0     | 3.51  | 1.13  | 2     | 0    | 0     | 0     | 0     | 0     | 0     | 0 |
| GENE2598X | 20434_at   | 20434_at   | 1     | 0.64  | 1.38  | 1.23  | 0.93 | 0.97  | 1.31  |       |       |       |   |
|           | 1.26       | 1.51       | 0.46  | -0.21 | -0.07 | 0.18  | 0.49 | 0.37  | 0.44  | -0.21 | 0.16  | 0.18  |   |





|           |            |            |       |       |       |       |       |       |       |       |       |       |       |
|-----------|------------|------------|-------|-------|-------|-------|-------|-------|-------|-------|-------|-------|-------|
| GENE2208X | 19835_at   | 19835_at   | 1     | 0.89  | 1.28  | 1     | 1.33  | 1.3   | 1.2   |       |       |       |       |
|           | 0.84       | 1.51       | 0.44  | -0.1  | -0.16 | 1.05  | 0.56  | 1.07  | 0.63  | 0.25  | 1.15  | 0.26  | -     |
|           | 0.53       | 0.42       | -0.13 | 0     | 0.55  | 0.65  | 0.07  | 0.28  | -0.39 | -0.62 | 0     | 0.23  | -0.1  |
| GENE2207X | 19393_at   | 19393_at   | 1     | 0.9   | 1.11  | 0.56  | 0.48  | 0.87  | 1.06  |       |       |       |       |
|           | 0.59       | 0.61       | 0.32  | -0.15 | -0.05 | 0.73  | 0.76  | 0.09  | 0.12  | 0.53  | 0.62  | -0.3  | -     |
|           | 0.05       | 0.18       | -0.13 | 0.56  | 0.4   | 0.13  | 0.47  | 0.21  | -0.26 | -0.18 | -0.21 | 0.09  | 0.09  |
| GENE2209X | 12294_s_at | 12294_s_at | 1     | 1.08  | 0.94  | 0.36  | 0.73  | 1.41  | 0.92  |       |       |       |       |
|           | 1.22       | 0.8        | 0.65  | 0.11  | 0.33  | 0.45  | 0.64  | 1.49  | 0.15  | 0.08  | 0.16  | 0     | 0     |
|           | 0          | -0.28      | 0.9   | 0.58  | 0.97  | 0.8   | 0.35  | -1.55 | -0.21 | -0.04 | 0.16  | 0.32  |       |
| GENE1994X | 12562_at   | 12562_at   | 1     | 0.85  | 0.32  | 0.2   | 0.91  | 1.05  | 1.85  |       |       |       |       |
|           | 0.65       | 0.84       | 1.25  | 1.35  | 0.68  | 0.53  | 0.82  | 1.05  | 0.97  | 0.51  | 0.38  | 0.22  | -     |
|           | 0.08       | 0.7        | 0.15  | 1.13  | 0.72  | 0.77  | 0.74  | 1     | -1.18 | 0.02  | -0.18 | -0.07 | 0.36  |
| GENE2197X | 20165_at   | 20165_at   | 1     | 0.84  | 0.45  | 0.79  | 1.41  | 1.18  | 0.41  |       |       |       |       |
|           | 0.13       | 0.23       | 0     | -0.04 | 0.25  | 0.56  | 0.63  | -0.07 | 0.42  | 0.27  | 0.65  | 0.41  | -     |
|           | 0.43       | 0.08       | 0.07  | -0.2  | 0.63  | 0.42  | 0.49  | 0.31  | -0.94 | -0.2  | -0.37 | -0.1  | 0.05  |
| GENE2196X | 12031_at   | 12031_at   | 1     | 1.33  | 0.97  | 0.95  | 1.13  | 1.17  | 1.02  |       |       |       |       |
|           | 0.95       | 0.94       | 0.18  | -0.39 | -0.34 | 0.16  | 0.54  | 0.09  | 0.28  | 0.17  | 0.36  | -0.26 | -     |
|           | 0.78       | 1.09       | 0.4   | -0.26 | 0.4   | 0.29  | 0.26  | -0.51 | -1.39 | -0.34 | -0.1  | -0.05 | -0.02 |
| GENE2195X | 16499_at   | 16499_at   | 1     | 2.16  | 1.18  | 0.6   | 1.01  | 0.91  | 0.69  |       |       |       |       |
|           | 0.44       | 0.78       | 0.18  | -0.64 | -0.3  | 0.47  | 0.79  | -0.15 | -0.08 | 0.43  | 1.13  | -0.15 |       |
|           | 0.04       | 1.02       | 0.92  | 0.59  | 1.38  | 1.17  | 0.37  | -0.08 | -0.88 | -0.1  | -0.35 | -0.3  |       |
|           | 0.15       |            |       |       |       |       |       |       |       |       |       |       |       |
| GENE1988X | 18045_at   | 18045_at   | 1     | 0.44  | 1.66  | 0.96  | 1.03  | 1.77  | 1.41  |       |       |       |       |
|           | 1.32       | 0.84       | 0.32  | -0.28 | -0.45 | 0.58  | 0.51  | 0.16  | 0.37  | 0.07  | 0.27  | 0.07  | -     |
|           | 0.25       | -0.41      | 0.15  | 1.45  | 0.65  | 0.49  | 0.36  | -0.81 | -1.51 | 0     | 0.22  | -0.62 | -0.15 |
| GENE1987X | 13604_at   | 13604_at   | 1     | 0.87  | 1.07  | 0.85  | 0.67  | 0.96  | 1.38  |       |       |       |       |
|           | 0.37       | 0.85       | 0.28  | -0.26 | -0.2  | 0.57  | 0.59  | 0.01  | 0.36  | 0.28  | 0.45  | 0.04  | -     |
|           | 0.3        | -0.43      | 0.05  | 0.45  | 0.32  | 0.21  | 0.12  | -0.41 | -0.78 | 0.04  | -0.49 | -1    | -0.94 |
| GENE2179X | 19948_at   | 19948_at   | 1     | 0.77  | 0.77  | 0.16  | 0.36  | 1.02  | 0.62  |       |       |       |       |
|           | 0.54       | 0.51       | 0.37  | -0.32 | -0.02 | 0.11  | 0.26  | -0.12 | -0.16 | 0.18  | 0.21  | -0.23 | -     |
|           | 0.94       | 0.22       | 0.15  | 0.23  | 0.59  | 0.79  | 0.67  | -1.15 | -1    | 0.16  | -0.07 | -0.28 | 0.01  |
| GENE2178X | 20014_at   | 20014_at   | 1     | 0.38  | 0.36  | 0.27  | 0.11  | 0.58  | 0.61  |       |       |       |       |
|           | 0.75       | 0.69       | 0.16  | -0.04 | 0.01  | 0.08  | 0.08  | 0.29  | 0.11  | -0.21 | -0.32 | -0.43 | -     |
|           | 0.41       | -0.3       | 0.56  | 0.56  | 1.11  | 0.97  | 1.02  | -0.35 | -0.35 | 0.25  | 0.11  | -0.39 | -0.12 |
| GENE2177X | 20261_at   | 20261_at   | 1     | 0.88  | 0.77  | 0.63  | 0.64  | 0.69  | 0.87  |       |       |       |       |
|           | 0.99       | 1.08       | 0.18  | -0.3  | -0.15 | -0.28 | 0.2   | 0.36  | 0.09  | -0.12 | 0.16  | 0     | -     |
|           | 0.02       | 0.08       | 0.05  | 0.31  | 0.86  | 0.86  | 0.83  | -0.23 | -0.59 | 0.12  | 0.08  | -0.16 | 0     |
| GENE2176X | 20361_s_at | 20361_s_at | 1     | 0.62  | 0.56  | 0.62  | 0.76  | 0.36  | 0.54  |       |       |       |       |
|           | 1.05       | 0.84       | 0.22  | 0.12  | 0.28  | -0.83 | 0.13  | 0.64  | 0.21  | 0.32  | 0.26  | -0.15 | -     |
|           | 0.15       | 0.25       | 0.12  | 0.32  | 1.03  | 0.87  | 1     | -0.41 | -0.68 | -0.07 | 0.12  | 0.07  | 0.29  |
| GENE1778X | 16571_s_at | 16571_s_at | 1     | 1.57  | 0.48  | 1.18  | 1.32  | 1.82  | 1.47  |       |       |       |       |
|           | 0.46       | 0.35       | 0.42  | -1.21 | -0.94 | -1.15 | -0.51 | -0.97 | -0.26 | -0.45 | -0.1  | -0.08 |       |
|           | 0.2        | 0.32       | 0.61  | 1.13  | 1.11  | 0.83  | 0.64  | 0.08  | -0.23 | 0.09  | -0.23 | -0.1  | -     |
|           | 0.08       |            |       |       |       |       |       |       |       |       |       |       |       |
| GENE1567X | 13653_at   | 13653_at   | 1     | 2.11  | 1.24  | 0.91  | 0.67  | 1.53  | 1.43  |       |       |       |       |
|           | 0.53       | 0.44       | 0.32  | -1    | -1.08 | -1.43 | 0.32  | -1.35 | -0.45 | -0.08 | 0.28  | -0.45 | -     |
|           | 0.49       | 1.46       | 1.53  | 0.76  | 1.63  | 1.17  | 0.38  | -0.45 | -0.66 | 0.7   | 0.28  | -0.62 | 0     |
| GENE1568X | 20331_at   | 20331_at   | 1     | 0.97  | 0.28  | 0.65  | 1.45  | 2.07  | 0.79  |       |       |       |       |
|           | 0.61       | 0.01       | 0.04  | -0.81 | -0.55 | -0.05 | -0.13 | -0.59 | -0.51 | -0.35 | -0.2  | 0.08  |       |
|           | 0.33       | 0.63       | 1.11  | 0.49  | 1.61  | 1.16  | 0.86  | 0.56  | -0.62 | 0.43  | 0.02  | 0.17  |       |
|           | 0.48       |            |       |       |       |       |       |       |       |       |       |       |       |
| GENE1697X | 20294_at   | 20294_at   | 1     | 1.97  | 1.43  | 1.03  | 1.5   | 1.4   | 1.1   |       |       |       |       |
|           | 1.76       | 1.62       | -0.73 | -0.97 | -1.18 | -1.25 | -0.32 | 0.27  | 0.65  | -0.94 | -0.39 | -0.12 |       |
|           | 1.05       | 1.2        | 1.43  | 0.37  | 1.96  | 1.58  | 1.23  | -1.88 | -0.32 | 0.05  | -0.07 | -0.35 | -     |
|           | 0.25       |            |       |       |       |       |       |       |       |       |       |       |       |
| GENE1566X | 19220_at   | 19220_at   | 1     | 1.32  | 0.72  | 0.07  | 0.91  | 1.08  | 1.04  |       |       |       |       |
|           | 0.48       | 0.62       | 0.58  | -0.62 | -0.62 | -0.13 | 0     | -0.3  | -0.08 | -0.39 | -0.12 | 0.38  |       |

|           |            |            |       |       |       |       |       |       |       |       |       |       |
|-----------|------------|------------|-------|-------|-------|-------|-------|-------|-------|-------|-------|-------|
| 0.59      | 1.07       | 1.39       | 1.39  | 1.77  | 1.46  | 0.29  | -0.53 | -0.47 | 0.13  | 0.17  | -0.57 | -     |
| 0.34      |            |            |       |       |       |       |       |       |       |       |       |       |
| GENE1908X | 20402_at   | 20402_at   | 1     | 0.29  | 0.42  | 1.07  | 1.12  | 1.68  | 1.05  |       |       |       |
| 0.36      | 0.45       | 0.51       | 0.44  | 0.22  | 0.18  | 0.07  | -0.28 | 0.59  | -0.47 | -0.71 | 0.2   |       |
| 0.58      | 0.43       | 0.76       | 0.68  | 0.91  | 0.58  | 0.42  | 1     | 0.43  | -0.13 | -0.53 | 0.43  | -     |
| 0.08      |            |            |       |       |       |       |       |       |       |       |       |       |
| GENE1815X | 12175_at   | 12175_at   | 1     | 0.44  | 0.72  | 1.18  | 1.28  | 1.17  | 0.4   |       |       |       |
| 0.5       | -0.12      | 0.12       | -0.23 | -0.15 | -0.21 | -0.15 | -0.35 | 0.34  | -0.3  | -0.34 | 0.11  |       |
| 0.84      | 0.54       | 0.77       | 1.13  | 0.97  | 0.91  | 0.79  | 1.08  | -0.2  | -0.16 | -0.16 | -0.04 | -     |
| 0.62      |            |            |       |       |       |       |       |       |       |       |       |       |
| GENE1818X | 16299_at   | 16299_at   | 1     | 0.89  | 0.84  | 2.64  | 2.89  | 3.93  | 2.64  |       |       |       |
| 0.79      | -0.49      | 2.11       | -1.32 | 0.4   | -0.1  | 0.27  | -0.94 | 0.74  | -0.15 | -0.3  | 1.05  |       |
| 1.62      | -0.59      | 0.59       | 2.98  | 1.05  | 1.14  | 0.72  | 1     | -0.55 | 0.49  | -0.41 | -0.28 | -     |
| 0.47      |            |            |       |       |       |       |       |       |       |       |       |       |
| GENE1817X | 14122_at   | 14122_at   | 1     | 1.25  | 0.66  | 1.7   | 1.68  | 2.56  | 1.94  |       |       |       |
| 1.14      | 0.44       | 0.17       | -1.15 | 0.23  | -0.49 | 0.27  | -0.05 | 0.45  | -0.57 | -0.57 | 0     |       |
| 1.39      | 0.55       | 1.13       | 2.46  | 1.61  | 1.41  | 0.4   | 0.91  | 0.11  | 0.4   | -0.25 | 0     | -     |
| 0.51      |            |            |       |       |       |       |       |       |       |       |       |       |
| GENE1816X | 12467_at   | 12467_at   | 1     | 1.13  | 0.82  | 1.79  | 1.64  | 2.41  | 2     |       |       |       |
| 1.65      | 0.38       | 0.87       | -0.71 | 0.58  | -0.71 | -0.47 | 0     | 0.09  | -0.15 | -0.32 | 0.32  |       |
| 0.69      | 0.69       | 0.41       | 1.5   | 0.92  | 0.92  | 0.76  | 1.26  | -0.59 | 0     | 0.41  | 0     | -     |
| 0.68      |            |            |       |       |       |       |       |       |       |       |       |       |
| GENE1814X | 17031_s_at | 17031_s_at | 1     | -0.18 | 0     | 2.2   | 1.58  | 3.07  | 1.37  |       |       |       |
| 1.61      | -1.39      | 1.67       | 0     | 0     | 0     | 0     | -1.12 | 0     | -0.86 | -0.86 | 1     |       |
| 2.76      | 1.58       | 1.52       | 3.88  | 2     | 2.02  | 1.9   | 2.5   | 1.8   | 1.85  | 0.69  | 1.37  |       |
| 0.26      |            |            |       |       |       |       |       |       |       |       |       |       |
| GENE1813X | 15013_at   | 15013_at   | 1     | -0.39 | 0.89  | 0.76  | 0.65  | 1.58  | 1.14  |       |       |       |
| 0.38      | -0.35      | 0.6        | -0.05 | 0.37  | 0.23  | 0.05  | -0.23 | -0.3  | -0.25 | 0.09  | -0.18 |       |
| 0.54      | -0.34      | 0.04       | 1     | 0.71  | 0.74  | 1.18  | 1.31  | 0.87  | 0.15  | 0.42  | -0.39 |       |
| 0.02      |            |            |       |       |       |       |       |       |       |       |       |       |
| GENE1807X | 16257_at   | 16257_at   | 1     | 0.45  | 0.25  | 1.07  | 0.43  | 1.49  | 0.93  |       |       | -     |
| 0.04      | 0.05       | 0.35       | 0.07  | -1    | 0.12  | 0.21  | -0.41 | 0.13  | 0.17  | 0     | -0.41 | -0.97 |
| 0.44      | 0.01       | 0.84       | 0.42  | 0.56  | 0.42  | 1.2   | 0.37  | 0.17  | 0.09  | 0.02  | -0.12 |       |
| GENE1806X | 12421_at   | 12421_at   | 1     | 0.47  | 0.22  | 0.45  | -0.43 | 1.11  | 1.11  |       |       |       |
| 0.16      | -0.18      | 0.54       | -0.34 | -0.55 | -0.66 | -0.05 | -0.62 | -0.1  | -0.23 | -0.08 | -0.28 | -     |
| 0.25      | 0.09       | -0.25      | 0.35  | 0.42  | 0.75  | 0.84  | 0.46  | 0.01  | 0.04  | -0.34 | 0.27  | -0.04 |
| GENE1823X | 20432_at   | 20432_at   | 1     | 1.43  | 1.65  | 2.89  | 2.98  | 3.86  | 3.17  |       |       |       |
| 3.65      | 3.63       | 0.84       | -2.25 | -1.51 | -0.49 | -0.23 | 0     | -0.07 | -1    | -1    | -0.49 |       |
| 0.09      | -1.88      | 1.92       | 2.07  | 2.32  | 1.84  | 2     | 2     | 0     | 1.48  | 0.48  | -1.39 | -     |
| 1.88      |            |            |       |       |       |       |       |       |       |       |       |       |
| GENE1822X | 17930_s_at | 17930_s_at | 1     | 0.6   | 1.06  | 2.08  | 0.74  | 2.64  | 1.88  |       |       |       |
| 2.47      | 1.6        | 1.43       | -2.25 | -1.43 | -1.32 | -0.16 | 0.43  | -0.78 | -1.73 | -1.59 | -0.68 |       |
| 0.55      | -1         | -0.76      | 2.42  | 1.09  | 0.85  | 1.62  | 0.93  | -1.12 | -0.1  | -0.76 | -1.32 | -     |
| 1.88      |            |            |       |       |       |       |       |       |       |       |       |       |
| GENE1821X | 18663_s_at | 18663_s_at | 1     | 0.01  | 0.8   | 1.45  | 0.58  | 1.86  | 0.84  |       |       |       |
| 1.44      | 0.27       | 0.8        | -0.88 | -0.41 | -0.08 | -0.32 | -0.07 | -1.39 | -0.86 | -1.73 | -0.21 | -     |
| 1.12      | 0.12       | 0.11       | 0.2   | 0.41  | 1.02  | 0.59  | 0.44  | 0.44  | 0     | -0.13 | 0     | 0.05  |
| GENE1796X | 16198_at   | 16198_at   | 1     | 2     | 2.58  | 3.27  | 2.39  | 2.8   | -1    |       |       |       |
| 3.29      | 1.13       | -0.73      | -1    | -1.15 | -0.26 | -0.26 | 0.48  | -0.73 | 0     | 0     | -0.47 |       |
| 0.12      | 1.37       | 0          | 2.37  | 0.67  | 1.37  | 0.76  | 2.07  | 0.48  | 0     | 1.26  | 1.92  | 1     |
| GENE1795X | 17508_at   | 17508_at   | 1     | 0.02  | 0.7   | 0.8   | 0.62  | 0.72  | -0.25 |       |       |       |
| 1.27      | 0.05       | -0.21      | -0.02 | -0.49 | -0.07 | -0.25 | -0.55 | -0.26 | -0.34 | -0.18 | -0.43 |       |
| 0.26      | 0.26       | 0.15       | 0.98  | 1.04  | 0.59  | 0.35  | 0.33  | 0.18  | -0.51 | 0.26  | 0.17  |       |
| 0.04      |            |            |       |       |       |       |       |       |       |       |       |       |
| GENE1787X | 19503_at   | 19503_at   | 1     | -0.25 | 0.37  | 0.22  | -0.08 | 1.36  | 1.22  |       |       |       |
| 0.72      | 0.73       | 0.5        | -0.51 | -0.49 | 0.13  | 0.05  | 0.53  | -0.18 | -0.26 | -0.21 | -0.07 | -     |
| 0.23      | 0.34       | 0.25       | 0.93  | 0.23  | 0     | 0.07  | 0.82  | 0.38  | 0.18  | -0.2  | 0.15  | 0.04  |

|           |            |            |       |       |       |       |       |       |       |       |       |       |
|-----------|------------|------------|-------|-------|-------|-------|-------|-------|-------|-------|-------|-------|
| GENE1786X | 16303_at   | 16303_at   | 1     | -0.21 | 0.37  | -0.62 | -0.12 | 1.09  | 0.97  |       |       |       |
|           | 0.09       | 0.22       | 0.77  | -0.81 | -0.2  | 0.37  | 0.46  | 0.32  | -0.45 | 0.09  | 0.01  | -0.08 |
|           | 0.01       | -0.02      | 0.01  | 0.94  | -0.05 | 0.26  | 0.29  | 0.5   | 0.55  | 0.25  | -0.13 | 0.02  |
|           | 0.08       |            |       |       |       |       |       |       |       |       |       |       |
| GENE1502X | 15982_s_at | 15982_s_at | 1     | -1.15 | -0.57 | 0.91  | -0.37 | 0.61  | 0.59  |       |       |       |
|           | 1.52       | 0.8        | 0.99  | -0.45 | 0.32  | -0.12 | 0.2   | 0.96  | -1.28 | -0.28 | -0.21 | -0.08 |
|           | 0.33       | -0.59      | -0.51 | 1.2   | 0.29  | 0.21  | 0.41  | 0.65  | 0.58  | 0.48  | 0.25  | -0.39 |
|           | 0.15       |            |       |       |       |       |       |       |       |       |       |       |
| GENE1790X | 16819_at   | 16819_at   | 1     | 0.6   | 0.48  | -0.34 | 0.4   | 2.15  | 3.11  |       |       |       |
|           | 0.87       | 1.69       | 1.72  | -2.12 | 0.27  | -0.32 | 0.26  | 0.41  | -0.34 | 0.94  | 1.21  | 0.69  |
|           | 0.45       | -0.26      | 0.15  | 1.94  | -0.43 | -0.04 | -0.43 | -0.05 | 0.04  | 0.48  | 0     | -0.57 |
|           | 0.66       |            |       |       |       |       |       |       |       |       |       |       |
| GENE1768X | 13330_at   | 13330_at   | 1     | 0.23  | -0.05 | -0.21 | 0.42  | 0.76  | 1.02  |       |       |       |
|           | 0.15       | 0.97       | 0.45  | -0.21 | 0.28  | -0.2  | 0     | 0.87  | 0.13  | 0.08  | -0.51 | 0.65  |
|           | 0.57       | -0.15      | 0.29  | 0.79  | -0.51 | -0.26 | -0.43 | -0.41 | 0.15  | -0.13 | -0.04 | -0.16 |
|           | 0.2        |            |       |       |       |       |       |       |       |       |       |       |
| GENE1441X | 18965_at   | 18965_at   | 1     | -0.16 | -0.73 | 0     | 0.23  | 1.29  | 0.71  |       |       |       |
|           | 0.6        | -0.16      | 0.91  | 0.18  | 0.08  | 0.05  | -0.02 | 0.22  | 0.11  | 0.17  | -0.43 | 0.2   |
|           | 0.57       | 0.01       | 0.21  | 0.8   | 0.04  | -0.41 | -0.47 | -0.78 | -0.25 | 0.27  | 0.11  | -0.02 |
| GENE1793X | 17467_at   | 17467_at   | 1     | 0.02  | 0.17  | -0.15 | 0.28  | 1.73  | 1     |       |       |       |
|           | 0.22       | -0.23      | 1.08  | -0.37 | 0.37  | -0.47 | 0.08  | 0     | -0.39 | 0.27  | -0.05 | -0.01 |
|           | 0.01       | -0.16      | -0.12 | 0.99  | -0.08 | -0.39 | -0.16 | 0.28  | -0.35 | -0.57 | -0.23 | -0.1  |
| GENE1792X | 12052_at   | 12052_at   | 1     | -0.37 | 0.49  | 0.09  | 0.02  | 1.48  | 1.13  |       |       |       |
|           | 0.02       | -0.59      | 1.13  | -0.41 | 0.17  | 0.08  | 0.6   | -0.28 | -0.26 | -0.2  | -1    | 0.02  |
|           | 0.25       | -0.07      | -0.41 | 1.08  | -0.04 | 0.07  | 0.44  | -0.37 | -0.81 | 0.02  | 0.18  | -0.04 |
| GENE1794X | 18954_at   | 18954_at   | 1     | -0.43 | 0.27  | 0.18  | -0.35 | 1.26  | 1.17  |       |       |       |
|           | 0.16       | 0.47       | 1.09  | -0.25 | -0.13 | -0.23 | -0.12 | -0.02 | -0.23 | -0.2  | -0.1  | -0.26 |
|           | 0.18       | 0.04       | -0.51 | 1.13  | -0.16 | 0.21  | 0.34  | 0.17  | 0.01  | -0.25 | -0.1  | -0.01 |
| GENE1788X | 20614_s_at | 20614_s_at | 1     | -0.1  | 0.17  | 0.02  | -0.32 | 0.91  | 1.31  |       |       |       |
|           | 0.18       | 0.09       | 1.01  | -0.12 | 0.05  | 0.2   | 0.29  | 0.37  | 0.12  | 0.09  | 0.12  | 0.08  |
|           | 0.17       | 0.13       | -0.18 | 1.15  | 0.11  | 0.23  | 0.47  | 0.29  | 0.22  | 0.01  | -0.04 | 0.07  |
|           | 0.08       |            |       |       |       |       |       |       |       |       |       |       |
| GENE1789X | 16900_at   | 16900_at   | 1     | 0.11  | 0.41  | 0.35  | -0.18 | 1.41  | 1.65  |       |       |       |
|           | 0.55       | 0.49       | 1.49  | -0.08 | 0.07  | -0.07 | 0.35  | -0.12 | 0.02  | 0.26  | 0.45  | 0.79  |
|           | 0.07       | -0.34      | 1.18  | 0.23  | 0.9   | 0.37  | -0.13 | -0.15 | -0.15 | -0.15 | -0.12 | 0     |
| GENE1435X | 16055_s_at | 16055_s_at | 1     | 0.12  | -0.51 | -2.12 | -2.05 | 1.29  | 2.15  |       |       |       |
|           | 0.73       | 0.49       | 1.82  | -0.28 | 0.11  | 0.56  | 0.88  | 0.9   | -0.71 | 0.28  | -0.15 | 0.11  |
|           | 1.05       | -0.97      | -2.18 | 1.84  | 0.11  | 0.32  | 0.84  | -0.07 | -0.88 | 0.28  | 0.38  | -0.23 |
| GENE1434X | 18278_at   | 18278_at   | 1     | 0.32  | -0.25 | -0.2  | -0.68 | 0.8   | 0.91  |       |       |       |
|           | 1.17       | 1.2        | 0.82  | -0.18 | -0.32 | 0     | 0.18  | 1.09  | -0.34 | -0.08 | 0.28  | -0.34 |
|           | 0.59       | -0.2       | -0.47 | 0.79  | -0.53 | -0.01 | 0.12  | -1.05 | -0.78 | 0.01  | -0.15 | -0.07 |
| GENE1433X | 20647_at   | 20647_at   | 1     | -1.08 | 0.04  | 0.82  | 0.05  | 1.18  | 1.58  |       |       |       |
|           | 0.9        | 0.53       | 0.55  | -0.26 | -0.35 | -0.41 | -0.1  | -0.2  | 0.21  | -0.53 | -0.23 | -0.32 |
|           | 0.64       | -0.88      | -1.28 | 0.84  | -0.73 | -0.47 | 0     | 0.69  | -0.55 | -0.05 | 0.07  | -0.25 |
| GENE1432X | 16031_at   | 16031_at   | 1     | 0.5   | 0.91  | 0.09  | 0.05  | 1.28  | 2.07  |       |       |       |
|           | 0.83       | 1.67       | 0.87  | -0.55 | 0.02  | -0.23 | -0.15 | 0.35  | -0.78 | 0.33  | -0.02 | 0.04  |
|           | 0.97       | -0.66      | -0.05 | 1.22  | -1.25 | -1.64 | -1    | 0     | -1.18 | -0.28 | -0.37 | -0.71 |
| GENE1431X | 17192_s_at | 17192_s_at | 1     | 0.04  | 0.21  | 0.28  | 0.01  | 0.71  | 1.1   |       |       |       |
|           | 0.44       | 1.18       | 0.41  | -0.26 | -0.1  | 0.04  | -0.18 | 0.4   | 0.12  | 0.05  | -0.21 | 0.33  |
|           | 0.28       | -0.21      | -0.55 | 1.01  | 0.04  | -0.2  | -0.05 | 0.46  | -0.16 | -0.35 | -0.34 | -0.57 |
| GENE1430X | 18014_s_at | 18014_s_at | 1     | -0.25 | -0.13 | -0.15 | -0.23 | 1.02  | 1.14  |       |       |       |
|           | 0.72       | 0.42       | 0.4   | -0.73 | -0.32 | -0.04 | -0.23 | 0.34  | -0.59 | 0.04  | -0.49 | -0.07 |
|           | 0.25       | -0.64      | -0.57 | 1.58  | -0.39 | -0.45 | -0.02 | -0.25 | -0.28 | -0.13 | -0.04 | -0.21 |
|           | 0.04       |            |       |       |       |       |       |       |       |       |       |       |
| GENE1429X | 20264_at   | 20264_at   | 1     | -0.08 | 0.25  | -0.02 | 0.05  | 1.06  | 1.01  |       |       |       |
|           | 0.29       | 0.52       | 1.17  | -0.34 | -0.35 | 0.37  | 0.44  | 0.53  | -0.34 | -0.04 | 0.21  | -0.62 |
|           | 0.25       | -0.41      | -0.1  | 0.98  | -0.18 | -0.18 | -0.23 | -0.32 | -0.86 | -0.35 | -0.51 | -0.41 |





|           |            |            |       |       |       |       |       |       |       |       |       |       |      |
|-----------|------------|------------|-------|-------|-------|-------|-------|-------|-------|-------|-------|-------|------|
| GENE1767X | 12251_at   | 12251_at   | 1     | 0.65  | 0.81  | 1.08  | 1.23  | 1.25  | 0.01  |       |       |       |      |
|           | 1.64       | 1.54       | 0.61  | -1.39 | -0.41 | -1.43 | -0.83 | 0.83  | -0.97 | -0.47 | -0.76 | -0.2  |      |
|           | 0.74       | 1.09       | 1.24  | 0.11  | 0.65  | -0.25 | -0.32 | 0.44  | 0.69  | -0.45 | -0.64 | -0.3  | -    |
|           | 0.41       |            |       |       |       |       |       |       |       |       |       |       |      |
| GENE1766X | 14553_at   | 14553_at   | 1     | 1.02  | 0.79  | 1.62  | 1.31  | 0.17  | 0.49  |       |       |       |      |
|           | 2.06       | 2.15       | -1.15 | -5.05 | -2.73 | -3.47 | -1.69 | 0.44  | -0.35 | -2.18 | -1.51 | -0.39 |      |
|           | 0.94       | 1.66       | 2.02  | -0.07 | 2.04  | 1.77  | 0.84  | 1.2   | 1.2   | 0.44  | -0.05 | 0.23  |      |
|           | 0.08       |            |       |       |       |       |       |       |       |       |       |       |      |
| GENE1765X | 16466_s_at | 16466_s_at | 1     | 1.7   | 1.43  | 1.22  | 1.52  | 1.02  | 1.12  |       |       |       |      |
|           | 3.07       | 3.32       | -0.26 | -1.32 | -1.39 | -0.25 | 0.16  | 2.14  | -0.32 | -1    | -0.3  | 0.44  |      |
|           | 1.82       | 0.31       | 0.29  | 0.8   | 0.87  | 1.13  | 0.8   | 0.79  | 0.2   | 0     | -0.1  | 0.53  |      |
|           | 0.04       |            |       |       |       |       |       |       |       |       |       |       |      |
| GENE1764X | 15960_at   | 15960_at   | 1     | 0.64  | 1.17  | 0.84  | 1.2   | 0.43  | 0.59  |       |       |       |      |
|           | 2.47       | 2.69       | -0.51 | -1.32 | -1.05 | -0.3  | 0.04  | 1.82  | -0.47 | -0.94 | -0.32 | 0.38  |      |
|           | 1.29       | 0.32       | 0.13  | 0.35  | 0.63  | 0.92  | 0.55  | 0.52  | 0.31  | 0.05  | -0.07 | 0.34  |      |
|           | 0.08       |            |       |       |       |       |       |       |       |       |       |       |      |
| GENE1763X | 16049_s_at | 16049_s_at | 1     | 0.72  | 0.36  | 0.4   | 1     | 0.58  | 0.48  |       |       |       |      |
|           | 1.42       | 1.65       | -0.83 | -1.39 | -1.25 | -0.94 | -0.71 | 0.99  | -0.83 | -1.12 | -0.57 | -0.18 |      |
|           | 1.49       | 0.11       | 0.42  | 0.32  | 0.71  | 0.84  | 0.36  | 0.56  | 0.43  | -0.08 | -0.57 | 0.43  | -    |
|           | 0.08       |            |       |       |       |       |       |       |       |       |       |       |      |
| GENE1762X | 18945_at   | 18945_at   | 1     | 1     | 0.15  | 0.76  | 1.52  | 0.65  | 1     |       |       |       |      |
|           | 2.29       | 2.72       | -0.59 | -0.07 | -0.23 | -1    | -1.64 | 1.96  | -0.94 | -0.35 | 0.42  | 0.08  |      |
|           | 1.66       | 0.49       | 0.48  | 0.54  | 0.29  | 0.49  | 0.04  | 0.16  | -0.15 | 0.01  | -0.18 | 0.4   |      |
|           | 0.08       |            |       |       |       |       |       |       |       |       |       |       |      |
| GENE1761X | 15337_at   | 15337_at   | 1     | 1.05  | -0.15 | 0.63  | 0.95  | 0.23  | 0.78  |       |       |       |      |
|           | 0.72       | 1.49       | -0.43 | -0.05 | -0.08 | -0.73 | -0.15 | 0.62  | -0.51 | -1.12 | -0.51 | 0.91  |      |
|           | 1.91       | -0.12      | 0.48  | 0.98  | 0.68  | 0.76  | 0.23  | 0.88  | -0.41 | 0.45  | 0.94  | -0.76 | -    |
|           | 1.25       |            |       |       |       |       |       |       |       |       |       |       |      |
| GENE1760X | 14468_at   | 14468_at   | 1     | 0.86  | -0.39 | 0.36  | 1.11  | 0.23  | 0.43  |       |       |       |      |
|           | 0.12       | 0.54       | -1.05 | -0.68 | -1.08 | -1.05 | -0.39 | 0.37  | -0.76 | -1.35 | -1.94 | 0     | 2.7  |
|           | 0.36       | 0.94       | -0.16 | 0.32  | -0.66 | 1.03  | -0.68 | -0.57 | -0.47 | -0.68 | -0.86 |       | 0    |
| GENE2427X | 18165_at   | 18165_at   | 1     | 0.84  | 1     | 1.05  | 0.58  | 1.71  | 1.51  | 0     |       |       |      |
|           | -0.15      | 0.55       | 0.2   | -0.04 | -0.05 | 0.87  | -0.15 | 0.68  | 0.22  | 0.08  | 0.6   | 0.58  |      |
|           | 0.26       | 0.74       | 0.73  | 0     | 0.6   | -0.07 | 0.49  | 0     | 0.34  | -0.47 | -0.39 | -0.49 |      |
| GENE2426X | 20281_at   | 20281_at   | 1     | 0.77  | 0.76  | 1.11  | 0.74  | 0.38  | 1.04  |       |       |       |      |
|           | 0.02       | -0.18      | -0.05 | -0.18 | 0.23  | -0.41 | 0.45  | -0.39 | 1     | 0     | -0.07 | 0.9   |      |
|           | 1.85       | 0.72       | 0.87  | 0.91  | 0.13  | 0.45  | -0.05 | 0.15  | 0     | -0.2  | -0.34 | -0.25 | -    |
|           | 0.45       |            |       |       |       |       |       |       |       |       |       |       |      |
| GENE1627X | 12158_at   | 12158_at   | 1     | 1.05  | 0.38  | 0.08  | 0.58  | 0.8   | 1.5   |       |       |       |      |
|           | 0.1        | -0.04      | 0.4   | 0.11  | 0.37  | 0.27  | 0.01  | 0.11  | 0.76  | -0.02 | -0.64 | 0.55  | 1.2  |
|           | 0.63       | 0.82       | 1.02  | 1     | 0.75  | 0.53  | -0.2  | -0.37 | -0.59 | -0.41 | -0.21 | 0.27  |      |
| GENE1626X | 12490_at   | 12490_at   | 1     | 1.27  | 0.8   | 0.73  | 0.94  | 0.72  | 1.03  |       |       |       |      |
|           | 0.02       | 0.29       | -0.2  | -0.12 | 0.33  | 0.35  | 0.21  | -0.1  | 0.96  | 0.15  | -0.02 | 0.35  |      |
|           | 1.45       | 0.97       | 0.8   | 0.54  | 0.63  | 1.17  | 0.41  | -0.37 | -0.43 | -0.71 | -0.15 | 0.65  |      |
|           | 0.49       |            |       |       |       |       |       |       |       |       |       |       |      |
| GENE1564X | 15403_s_at | 15403_s_at | 1     | 0.62  | 1.47  | 0.65  | 1.17  | 0.84  | 1.55  |       |       |       |      |
|           | 0.53       | -0.3       | 0.08  | -0.88 | -0.59 | -0.12 | 0.18  | -0.97 | 1.05  | -1.15 | -0.15 | 0.23  | 1.31 |
|           | 1.41       | 1.27       | 1.22  | 1.02  | 0.72  | 0.9   | 0.62  | 0.55  | 0     | -0.21 | 0.16  | -0.15 |      |
| GENE1563X | 15367_at   | 15367_at   | 1     | 1.55  | 1.32  | 1.26  | 2.09  | 0.72  | 1.47  |       |       |       |      |
|           | 0.45       | 0.25       | -0.35 | -0.28 | 0.18  | 0.15  | 0.58  | -0.78 | 1.11  | -0.66 | -0.25 | 0.77  | 1.58 |
|           | 2.26       | 2.76       | 1.11  | 1.74  | 1     | 0.65  | 1.39  | 0.08  | 0.17  | -0.32 | 0     | -0.55 |      |
| GENE1780X | 19823_at   | 19823_at   | 1     | 0.61  | 0.5   | 1     | 1.91  | 1.33  | 2.34  | 0     |       |       |      |
|           | 0.46       | 0.68       | -0.18 | -1    | -1.25 | 0     | -0.47 | 0.52  | -1.39 | 0.09  | -0.23 | 1     |      |
|           | 1.94       | 0.88       | 0.37  | 0.23  | -0.3  | 0.53  | 1.26  | -0.49 | 0.5   | 0.5   | -0.49 | -0.23 |      |
| GENE1562X | 12446_at   | 12446_at   | 1     | 0.6   | 0.72  | 0.64  | 0.28  | 0.71  | 1.21  |       |       |       |      |
|           | 0.28       | 0.11       | -0.05 | -0.68 | -0.88 | 0.43  | 0.07  | -0.71 | 0.32  | 0.27  | 0     | -0.71 | 0.32 |
|           | 1.84       | 1.31       | 0.32  | 0.81  | 0.54  | -1.12 | 0.04  | -0.64 | -0.47 | 0     | 0.07  | 0.48  |      |





|           |            |             |             |       |       |       |       |       |       |       |      |  |  |   |
|-----------|------------|-------------|-------------|-------|-------|-------|-------|-------|-------|-------|------|--|--|---|
| GENE1742X | 20345_at   | 20345_at    | 1           | 1.03  | 0.77  | 1.16  | 2.9   | 1.46  | 1.39  |       |      |  |  |   |
|           | 0.46       | -0.01 1.05  | 0.01 1.17   | -0.2  | -0.15 | 0.07  | 0.35  | -0.51 | 0.18  | 2.36  |      |  |  |   |
|           | 4.43       | 2.05 1.97   | 2.96 1.98   | 2.18  | 2.21  | 3.05  | 2.76  | 1.97  | 1.67  | 1.94  |      |  |  |   |
|           | 1.21       |             |             |       |       |       |       |       |       |       |      |  |  |   |
| GENE1741X | 20235_i_at | 20235_i_at  | 1           | 1.29  | 1.26  | 2.08  | 2.58  | 1.17  | 1.68  |       |      |  |  |   |
|           | 0.74       | 0.15 0.37   | -0.68 0.67  | 0.49  | 0.65  | -0.08 | 0.45  | 0.17  | 0.54  | 2.48  |      |  |  |   |
|           | 4.76       | 2.82 2.36   | 2.83 2.85   | 2.88  | 2.23  | 2.8   | 1.22  | 1.32  | 0.87  | 1.42  |      |  |  |   |
|           | 1.38       |             |             |       |       |       |       |       |       |       |      |  |  |   |
| GENE1724X | 19664_at   | 19664_at    | 1           | 1.18  | 1.64  | 1.39  | 2.18  | 1.48  | 0.94  |       |      |  |  |   |
|           | 0.78       | 0 0.16      | -0.41 -0.13 | 0.05  | 0.12  | -0.18 | -0.05 | -0.49 | 0.04  | 0.67  |      |  |  |   |
|           | 1.86       | 1.84 1.7    | 1.56 2.65   | 2.35  | 1.77  | 1.66  | 0.72  | 0.33  | 0.11  | 1.33  |      |  |  |   |
|           | 0.81       |             |             |       |       |       |       |       |       |       |      |  |  |   |
| GENE1723X | 12412_at   | 12412_at    | 1           | 0.56  | 0.94  | 0.98  | 1.46  | 1.27  | 0.37  |       |      |  |  |   |
|           | 0.5        | -0.45 0.31  | -0.07 -0.04 | 0.13  | 0.29  | -0.32 | 0     | -0.01 | 0.25  | 0.17  |      |  |  |   |
|           | 1.35       | 0.99 1.02   | 0.89 1.25   | 1.11  | 0.79  | 0.87  | 1.1   | 0.41  | 0.43  | 0.71  |      |  |  |   |
|           | 0.56       |             |             |       |       |       |       |       |       |       |      |  |  |   |
| GENE1722X | 16791_at   | 16791_at    | 1           | 2.48  | 2.54  | 1.17  | 1.67  | 1.42  | 1.63  |       |      |  |  |   |
|           | 0.8        | 0.58 0.95   | -0.68 0     | -0.49 | 0.88  | 0.11  | 0.32  | 0.26  | 1     | 1     |      |  |  |   |
|           | 2.53       | 2.83 2.45   | 1.81 3.36   | 2.32  | 2.62  | 1.77  | 1.87  | 1     | 0.73  | 1.18  |      |  |  |   |
|           | 0.65       |             |             |       |       |       |       |       |       |       |      |  |  |   |
| GENE1721X | 15085_at   | 15085_at    | 1           | 1.92  | 1.91  | 1.74  | 2.16  | 0.7   | 0.18  |       |      |  |  |   |
|           | 0.5        | -0.15 -0.34 | -0.05 -0.23 | 0.08  | 0.59  | -0.71 | 0.45  | 0.56  | 0.59  | 1.16  |      |  |  |   |
|           | 2.7        | 1.47 2.33   | 1.05 2.47   | 2.21  | 1.85  | 1.96  | 1.33  | 1.31  | 0.42  | 0.67  |      |  |  |   |
|           | 0.23       |             |             |       |       |       |       |       |       |       |      |  |  |   |
| GENE1685X | 20619_at   | 20619_at    | 1           | 1.01  | 1.63  | 1.83  | 2.48  | 0.59  | -0.49 |       |      |  |  |   |
|           | 0.85       | 0 -1.43     | -0.21 -0.45 | 0.15  | -0.05 | -0.3  | 0.07  | -0.66 | -0.39 | 0.55  |      |  |  |   |
|           | 2.33       | 3.34 3.42   | 1.36 3.06   | 2.99  | 0.97  | 0.83  | 1.22  | 0.48  | 0.37  | 0.73  |      |  |  |   |
|           | 0.33       |             |             |       |       |       |       |       |       |       |      |  |  |   |
| GENE1684X | 14529_at   | 14529_at    | 1           | 1.07  | 0.09  | 1.26  | 1.8   | 0.13  | 0     |       |      |  |  |   |
|           | 0.22       | 0.38 -0.57  | -1.59 -0.15 | -0.91 | -0.49 | -0.68 | 0     | -0.28 | -0.18 | 0.76  |      |  |  |   |
|           | 2.4        | 2.25 2.83   | 0.88 2.39   | 1.89  | 0.61  | 1.12  | 1.41  | -0.18 | 0.15  | 0.09  |      |  |  | - |
|           | 0.23       |             |             |       |       |       |       |       |       |       |      |  |  |   |
| GENE1683X | 12497_at   | 12497_at    | 1           | 1.34  | 0.49  | 1.18  | 1.86  | 0.2   | 0.32  |       |      |  |  | - |
|           | 0.34       | -0.57 -0.02 | 0.04 -0.05  | -1.12 | -0.62 | -0.71 | 0.65  | -0.97 | -1.35 | 1.24  | 2.61 |  |  |   |
|           | 2.4        | 2.23 0.64   | 2.07 1.82   | 1.42  | 1.44  | 0.42  | 0.76  | 0.85  | 0.58  | 0.42  |      |  |  |   |
| GENE1802X | 13219_at   | 13219_at    | 1           | 1.11  | 1.36  | -0.04 | 1.46  | 2.35  | 2.21  |       |      |  |  |   |
|           | 1.2        | 0.93 1.39   | -1.05 -0.12 | -0.68 | 0.08  | -0.26 | -2.32 | -0.83 | 0.02  | -0.26 |      |  |  |   |
|           | 1.87       | -0.15 0.65  | 2.45 1.51   | 1.92  | 1.89  | 1.6   | 1.02  | 1.05  | 0.49  | 0.76  |      |  |  |   |
|           | 0.12       |             |             |       |       |       |       |       |       |       |      |  |  |   |
| GENE1801X | 20287_at   | 20287_at    | 1           | 1.48  | 1.04  | 1.88  | 1.81  | 2.32  | 2.01  |       |      |  |  |   |
|           | 1.48       | 0.96 1.25   | -2.32 0.32  | -1.78 | -0.15 | -0.2  | -2.32 | -0.32 | 0.33  | 0.96  |      |  |  |   |
|           | 2.32       | 0.34 0.54   | 2.44 1.2    | 1.64  | 1.57  | 1.73  | 0.88  | 1.04  | 0     | 0.74  |      |  |  |   |
|           | 0.2        |             |             |       |       |       |       |       |       |       |      |  |  |   |
| GENE1800X | 13615_at   | 13615_at    | 1           | 0.38  | -0.39 | 0.42  | 0.35  | 1.02  | 0.5   |       |      |  |  |   |
|           | 1.01       | 0.12 0.54   | -0.07 0.44  | -0.41 | -0.39 | 0.15  | -0.94 | 0.43  | 0.32  | 0.28  |      |  |  |   |
|           | 0.54       | 0.13 0.41   | 1.06 1.11   | 1.07  | 1.07  | 0.01  | 0.25  | 0.35  | 0.31  | 0.01  |      |  |  |   |
|           | 0.09       |             |             |       |       |       |       |       |       |       |      |  |  |   |
| GENE1625X | 16818_at   | 16818_at    | 1           | 1.26  | 0.88  | 1.08  | 2.24  | 2.1   | 0.62  |       |      |  |  |   |
|           | 0.54       | -0.73 1.49  | -0.41 1.09  | 0.55  | 1.15  | -0.12 | 0.64  | 1.03  | 0.8   | 1.41  |      |  |  |   |
|           | 2.91       | 0.67 0.23   | 2.93 1.67   | 1.76  | 1.59  | 2.04  | -1.88 | -0.76 | -1.35 | 0.02  |      |  |  |   |
|           | 0.02       |             |             |       |       |       |       |       |       |       |      |  |  |   |
| GENE1621X | 15815_at   | 15815_at    | 1           | 1.3   | 0.28  | 0.67  | 1.01  | 0.45  | 1.05  |       |      |  |  | - |
|           | 0.18       | 0.09 0.23   | -0.45 0.49  | -0.21 | 0.08  | 0.01  | 0.2   | 0.18  | 0.25  | 1.36  | 2.07 |  |  |   |
|           | 0.42       | 0.8 1.06    | 0.62 0.74   | 0.56  | 0.21  | -0.76 | -0.04 | 0.15  | -0.32 | -0.34 |      |  |  |   |
| GENE1620X | 12315_at   | 12315_at    | 1           | 1.25  | 0.22  | 1.14  | 1.59  | 0.57  | 0.73  |       |      |  |  | - |
|           | 0.21       | -0.12 0.07  | -0.86 0.27  | -0.71 | -0.04 | -0.53 | 0.52  | 0.2   | 0.6   | 0.62  | 2.25 |  |  |   |
|           | 0.72       | 1.66 1.57   | 1.13 1.07   | 0.44  | 1.2   | -0.51 | 0.42  | 0.25  | 0.29  | -0.02 |      |  |  |   |

|           |            |            |       |       |       |       |       |       |       |       |       |       |
|-----------|------------|------------|-------|-------|-------|-------|-------|-------|-------|-------|-------|-------|
| GENE1619X | 16060_at   | 16060_at   | 1     | 1     | -0.02 | 0.4   | 0.98  | 0.17  | 0.54  | -     |       |       |
| 0.1       | -0.07      | 0.23       | -0.81 | 0.35  | -0.28 | 0.05  | -0.55 | -0.12 | 0.36  | 0.93  | 1.28  | 2.2   |
|           | 0.8        | 0.72       | 1.37  | 1.17  | 1.33  | 0.55  | 1.17  | -0.37 | -0.26 | -0.41 | 0.16  | -0.18 |
| GENE1505X | 20531_at   | 20531_at   | 1     | 0.34  | 0.15  | -0.55 | 1.11  | 0.35  | 0.67  |       |       |       |
|           | 0.21       | 0.45       | 0.33  | -1.18 | 0.84  | 0.23  | 0.12  | -0.1  | -0.62 | 0.23  | 0.59  | 0.82  |
|           | 0.56       | -0.62      | -0.47 | 0.38  | 1.02  | 0.97  | 0.71  | 0.08  | -0.91 | -0.12 | -0.51 | -0.16 |
| 0.02      |            |            |       |       |       |       |       |       |       |       |       |       |
| GENE2287X | 19848_s_at | 19848_s_at | 1     | 1.47  | 0.27  | 0.58  | 1.25  | 0.18  | 0.5   |       |       |       |
|           | 0.73       | 1.09       | 0.12  | -0.39 | 0.79  | 0.09  | 0.34  | 0.89  | 0.37  | 0.59  | 0.47  | 1.32  |
|           | 1.37       | 1.26       | 0.91  | 0.49  | 1.06  | 1.34  | 0.76  | -0.2  | -0.97 | -0.12 | -0.47 | -0.16 |
| 0.02      |            |            |       |       |       |       |       |       |       |       |       |       |
| GENE2286X | 16609_at   | 16609_at   | 1     | 1.33  | -0.16 | 0.7   | 1.22  | 0.59  | 1.42  |       |       |       |
|           | 1.89       | 2.73       | 1.51  | -0.57 | 2.09  | -0.15 | 0.13  | 1.33  | -0.23 | 1.1   | 1.73  | 2.43  |
|           | 0.2        | 1.39       | 2.34  | 0.56  | 2.65  | 1.36  | 0.29  | 0.32  | -1.39 | 0.12  | 0.35  | -0.45 |
| 0.35      |            |            |       |       |       |       |       |       |       |       |       |       |
| GENE1520X | 15184_s_at | 15184_s_at | 1     | 0.36  | -1.43 | -0.71 | 0.58  | -0.62 | 0.91  |       |       |       |
|           | 0.05       | 1.28       | -0.2  | -0.59 | 0.84  | -0.64 | -0.28 | 0.52  | 0.15  | 0.59  | -0.04 | 1.5   |
|           | 2.16       | 1.35       | 2.13  | 0.37  | 0.91  | 1.12  | -0.23 | -0.53 | 0.26  | 0.56  | 0.75  | -0.94 |
| 0.32      |            |            |       |       |       |       |       |       |       |       |       |       |
| GENE1688X | 16620_s_at | 16620_s_at | 1     | 1.73  | 2.14  | 3.03  | 4.2   | 0.8   | -0.32 |       |       |       |
|           | 2.66       | 0.91       | -1.88 | -1.51 | -0.2  | 0.33  | 0.76  | 0.27  | 0.48  | -1.59 | -0.05 | 2.24  |
|           | 3.81       | 2.81       | 4.08  | 0.69  | 2.56  | 2.24  | -0.04 | 0.29  | 0.46  | 0.49  | 0.2   | -1.15 |
| 0.59      |            |            |       |       |       |       |       |       |       |       |       |       |
| GENE1686X | 20335_s_at | 20335_s_at | 1     | 0.46  | 0.71  | 0.48  | 1.16  | -0.25 | -0.64 |       |       |       |
|           | 1.08       | 0.71       | -1.05 | -1.12 | 0.08  | -0.04 | -0.04 | -0.25 | -0.2  | -0.94 | -0.71 | 1.47  |
|           | 1.7        | 2.07       | 2.58  | 0.11  | 2.53  | 2.73  | 0.25  | 0.05  | -0.34 | 0.56  | 0.04  | -0.83 |
| 0.35      |            |            |       |       |       |       |       |       |       |       |       |       |
| GENE1687X | 15203_s_at | 15203_s_at | 1     | 0.77  | -0.16 | -0.01 | 1.31  | -0.08 | 0.21  |       |       |       |
|           | 0.91       | 1          | -0.32 | -1.47 | 0.02  | -0.1  | 0.26  | 0.71  | -0.39 | -1.39 | -0.32 | 0.89  |
|           | 2.1        | 1.9        | 2.53  | 2.12  | 1.56  | 1.53  | -0.04 | 1.2   | 0.97  | 0.52  | 1.5   | -0.78 |
| 0.91      |            |            |       |       |       |       |       |       |       |       |       |       |
| GENE1638X | 19268_at   | 19268_at   | 1     | 2.53  | 1.32  | 0.67  | 0.26  | 2.25  | 1.95  |       |       |       |
|           | 1.48       | 0.84       | 0.63  | 1.37  | 1     | -0.26 | 0.58  | 0     | 0.48  | 0.26  | 2     | 0.26  |
|           | 3.78       | 3.6        | 3     | 4.04  | 3.94  | 4.27  | 3.92  | 3.17  | 1.15  | 1.63  | 1.28  | 2.72  |
|           | 1.76       |            |       |       |       |       |       |       |       |       |       |       |
| GENE1637X | 17278_at   | 17278_at   | 1     | 1.69  | 1     | -0.37 | 0.63  | 0.43  | 1.68  | -     |       |       |
| 0.1       | 0.31       | 0.75       | 1.22  | 0.41  | 0.42  | 0.44  | 0.29  | 0.82  | 0.42  | 1.1   | 1     | 2.97  |
|           | 2.62       | 1.13       | 1.85  | 2.77  | 2.42  | 2.93  | 1.88  | 1.26  | 1     | 1.2   | 2.06  | 1.78  |
| GENE1636X | 16336_at   | 16336_at   | 1     | 0.42  | 0.32  | 0.07  | 0.26  | 0.53  | 0.84  |       |       |       |
|           | 0.28       | 0.04       | 0.53  | 0.07  | -0.16 | 0.02  | 0     | -0.18 | 0.38  | -0.08 | 0.27  | 0.34  |
|           | 0.89       | 0.72       | 0.27  | 1.08  | 1.42  | 1.27  | 1.23  | 0.2   | 0.34  | -0.04 | -0.16 | 0.13  |
| 0.16      |            |            |       |       |       |       |       |       |       |       |       |       |
| GENE1565X | 12943_at   | 12943_at   | 1     | 3.32  | 0.84  | 0.82  | -0.73 | 1.68  | 1.79  | -     |       |       |
| 0.13      | -0.2       | -0.35      | -0.86 | -2    | -0.2  | 0.45  | -0.53 | 1.47  | -0.23 | 1.89  | -0.41 | 1.43  |
|           | 2.08       | 3.34       | 1.81  | 3.54  | 3.5   | 2.77  | 1.85  | 0.41  | 0.87  | -0.26 | 0.58  | 0.21  |
| GENE1557X | 16331_at   | 16331_at   | 1     | 0.41  | -1.47 | 1.09  | 0.15  | 0.05  | 0.97  |       |       |       |
|           | 0.15       | 0.02       | 0.26  | -0.23 | 0     | -1.28 | -0.83 | 0.02  | 0.35  | -0.08 | 0     | 1.07  |
|           | 2.18       | 1.86       | 2.15  | 1.21  | 2.07  | 2.45  | 1.84  | 0.78  | -0.86 | 0.52  | -0.59 | 0.78  |
| 0.3       |            |            |       |       |       |       |       |       |       |       |       |       |
| GENE1677X | 16712_at   | 16712_at   | 1     | 2.64  | 1.94  | 0.97  | 2     | 1.58  | 1     |       |       |       |
|           | 0.92       | 1.43       | 0.2   | -0.26 | -0.35 | -0.15 | 0.84  | 0.29  | 0.68  | 0.51  | 0.85  | 0.87  |
|           | 1.27       | 3.91       | 3.37  | 1.17  | 2.27  | 1.48  | -0.23 | 0     | 0.07  | 0.07  | -0.41 | 0.09  |
|           | 0.43       |            |       |       |       |       |       |       |       |       |       |       |
| GENE1676X | 12335_at   | 12335_at   | 1     | 1.11  | 1.03  | -0.05 | 0.79  | 1.09  | 0.85  | 0     |       |       |
|           | -0.15      | 0.36       | -0.62 | -0.26 | -0.05 | 0.11  | -0.32 | 0.18  | 0.01  | 0.44  | 0.38  | 0.73  |
|           | 2.2        | 2.39       | 0.47  | 1.87  | 1.43  | 0.46  | 0.37  | 0.25  | 0.11  | 0.07  | 0.15  | 0.11  |



|           |            |            |       |       |       |       |       |       |       |       |       |       |       |
|-----------|------------|------------|-------|-------|-------|-------|-------|-------|-------|-------|-------|-------|-------|
| GENE1692X | 17752_at   | 17752_at   | 1     | 0.73  | 0.66  | 1.2   | 1.26  | 0.5   | 0.48  |       |       |       |       |
|           | 0.4        | 0.55       | -0.47 | -0.18 | -0.13 | -0.68 | -0.32 | -0.35 | -0.08 | -0.83 | -1.18 | 0.16  |       |
|           | 1.12       | 0.45       | 1.32  | 0.56  | 1.14  | 1.09  | 0.85  | 0.57  | 0.82  | 0.42  | 0.29  | -0.2  | -     |
|           | 0.32       |            |       |       |       |       |       |       |       |       |       |       |       |
| GENE1691X | 18300_at   | 18300_at   | 1     | -0.05 | 1.59  | 2.32  | 1.27  | 0.13  | -0.1  |       |       |       |       |
|           | 1.56       | 0.71       | -1.25 | -0.43 | -0.88 | -0.68 | 0.04  | -0.39 | 1.01  | -0.88 | -0.66 | -0.12 |       |
|           | 0.41       | 2.19       | 2.78  | -0.26 | 1.85  | 0.97  | 0.41  | 0.93  | 1.34  | 0.11  | 0.21  | -0.13 |       |
|           | 0.23       |            |       |       |       |       |       |       |       |       |       |       |       |
| GENE1561X | 13296_at   | 13296_at   | 1     | 1.11  | 0.54  | 1.22  | 1.15  | 0.16  | 0.21  |       |       |       | -     |
|           | 0.13       | -0.21      | -0.35 | 1.02  | -0.26 | -0.39 | -0.71 | -0.55 | 1.05  | -0.51 | 0.09  | -0.15 | -0.04 |
|           | 0.49       | 0.92       | -0.2  | 1.23  | 0.98  | 0.78  | -0.08 | -0.04 | -0.12 | -0.73 | 0.36  | -0.08 |       |
| GENE1528X | 16457_s_at | 16457_s_at | 1     | 0.57  | -0.62 | 1.19  | 1.04  | -0.25 | -0.01 |       |       |       | -     |
|           | 0.91       | -0.47      | -0.73 | -0.97 | -0.88 | -0.97 | -0.68 | -1.64 | 0.35  | -0.68 | -0.62 | 0.63  | 1.24  |
|           | 2.2        | 0.52       | 1.53  | 1.4   | -0.13 | 0.02  | 0.17  | -0.18 | -0.37 | -0.39 | -0.53 |       | 2     |
| GENE1527X | 18896_at   | 18896_at   | 1     | 0.33  | -0.47 | 1.35  | 1.32  | -1.18 | -1.05 |       |       |       | -     |
|           | 0.35       | -0.97      | -1.05 | -0.73 | -0.3  | -0.49 | -0.62 | -0.88 | -0.04 | -0.15 | 0.33  | 0.76  | 1.44  |
|           | 1.79       | 1.87       | 0.64  | 0.96  | 0.84  | -0.47 | -0.02 | -0.12 | -0.23 | -0.25 | 0.05  | 0.09  |       |
| GENE1252X | 12759_at   | 12759_at   | 1     | 1     | 0.47  | 1.39  | 0.82  | 0.08  | -0.62 |       |       |       | -     |
|           | 0.86       | 0.32       | -0.66 | -2.47 | -1.05 | -1.64 | -0.25 | -0.97 | -0.51 | 0     | 0.11  | 0.26  | 0.69  |
|           | 0.53       | 2.06       | 0.2   | 1.61  | 1.31  | 0.56  | 0.48  | -0.66 | 0.74  | 0.78  | -0.37 | -0.55 |       |
| GENE1251X | 16528_at   | 16528_at   | 1     | 0.97  | -0.2  | 0.41  | 1.07  | 0.08  | -0.68 |       |       |       | -     |
|           | 0.21       | -0.53      | -0.88 | -1.08 | -0.55 | -0.59 | -0.55 | -1.12 | -0.57 | 0.11  | -0.08 | 0.35  | 0.23  |
|           | 0.38       | 0.94       | -0.12 | 1.13  | 0.42  | -0.07 | -0.37 | -0.32 | -0.35 | -0.25 | -0.18 | -0.05 |       |
| GENE1553X | 12308_at   | 12308_at   | 1     | 0.72  | 0.9   | 0.29  | 0.04  | 0.04  | 0.15  |       |       |       | -     |
|           | 0.04       | 0.47       | -0.81 | -0.91 | -0.25 | -0.2  | -0.15 | -0.35 | -0.39 | -0.62 | -0.23 | -0.66 | 0.59  |
|           | 0.09       | -0.04      | 0.09  | 0.94  | 1.17  | 0.97  | 1.37  | -0.04 | -0.26 | -0.41 | 0.37  | 0.02  |       |
| GENE1552X | 16617_s_at | 16617_s_at | 1     | 0.65  | -0.15 | -0.25 | 1.25  | -0.81 | 0.49  |       |       |       | -     |
|           | 0.51       | 0.71       | -0.47 | -1.08 | -0.08 | -0.51 | -0.71 | 0.29  | -1.51 | 0.26  | 0.41  | 0     | 1.84  |
|           | 0.65       | -0.12      | -0.18 | 0.46  | 1.09  | 0.41  | 0.41  | -0.26 | -0.49 | -0.51 | 0.56  | 0.02  |       |
| GENE1551X | 12353_at   | 12353_at   | 1     | 1.16  | 0.08  | -0.81 | -0.45 | 0.01  | 0.41  |       |       |       | -     |
|           | 0.41       | -0.59      | 0.04  | -0.53 | 0.33  | -0.64 | -0.2  | -0.13 | -1.32 | -0.07 | 0.28  | 1.17  | 3.23  |
|           | 1.4        | 0.96       | 0.81  | 1.2   | 1.36  | 1.48  | 1.69  | 1.39  | 0.92  | 0.63  | 1.46  | 0.94  |       |
| GENE1550X | 12354_g_at | 12354_g_at | 1     | 1.18  | -0.12 | -1.18 | -0.2  | -0.08 | 0.45  |       |       |       | -     |
|           | 0.62       | -0.66      | 0.04  | -0.68 | 0.41  | -0.66 | -0.28 | -0.15 | -1.73 | 0     | 0.26  | 1.27  | 3.44  |
|           | 1.54       | 1.12       | 0.87  | 1.08  | 1.31  | 1.41  | 1.55  | 1.35  | 1.04  | 0.76  | 1.54  | 1.06  |       |
| GENE1549X | 17097_at   | 17097_at   | 1     | 0.65  | 0.31  | -0.43 | 0.56  | -0.12 | 0.04  |       |       |       | -     |
|           | 0.17       | 0.25       | -0.13 | -0.91 | 0.23  | -1.28 | -0.91 | 0.18  | -0.78 | -0.81 | -0.51 | 0.44  |       |
|           | 1.86       | 0.92       | 1.23  | 0.32  | 1.5   | 1.2   | 1.16  | 1.17  | 1.42  | 1.02  | 0.85  | 0.33  |       |
|           | 0.22       |            |       |       |       |       |       |       |       |       |       |       |       |
| GENE1548X | 20369_s_at | 20369_s_at | 1     | 0.59  | -0.28 | 0.12  | 0.68  | -0.3  | 0.05  |       |       |       | -     |
|           | 0.05       | -0.37      | -0.35 | -0.94 | -0.26 | -0.68 | -0.47 | -0.34 | -0.78 | -0.47 | 0.2   | 0.86  | 2.42  |
|           | 1.24       | 1.35       | 0.61  | 1.15  | 1.4   | 1.18  | 1.32  | 1.35  | 0.92  | 0.73  | 0.75  | 0.49  |       |
| GENE1547X | 12805_s_at | 12805_s_at | 1     | 0.23  | -1    | -0.91 | -0.21 | -0.59 | 1.09  |       |       |       | -     |
|           | 0.59       | 0.41       | -0.18 | -2.05 | -1.08 | -1.47 | -1.18 | -0.59 | -0.94 | -0.49 | 0.02  | 0.37  | 2.39  |
|           | 0.89       | 0.66       | 1.4   | 0.89  | 1.31  | 1.25  | 1.46  | 0.04  | 0.53  | 0.26  | 0.49  | 0     |       |
| GENE1536X | 16061_s_at | 16061_s_at | 1     | 2.19  | 0     | -1.43 | -0.08 | 0.15  | 0.66  |       |       |       | -     |
|           | 0.83       | -0.73      | -0.35 | -0.3  | 0     | 0.09  | 0.07  | -0.73 | -0.05 | 0.35  | 0.12  | 0.65  | 1.39  |
|           | 1.06       | 0.87       | 0.2   | 1     | 1.01  | 0.26  | 0.11  | 0.27  | 0.07  | 0.74  | 0.12  | 0.46  |       |
| GENE1535X | 20701_s_at | 20701_s_at | 1     | 0.96  | -0.32 | -0.76 | -0.49 | -0.07 | 0.09  |       |       |       | -     |
|           | 1.21       | -1.18      | -0.25 | -0.34 | -0.66 | -0.55 | -0.55 | -1    | -0.15 | -0.21 | 0.31  | -0.23 | 0.88  |
|           | 1.07       | 1.07       | 0.42  | 0.69  | 0.83  | 0.64  | 0.52  | 0.38  | 0.65  | 0.38  | 0.65  | 0.38  |       |
| GENE1545X | 19267_s_at | 19267_s_at | 1     | 1.43  | 1.34  | 2.94  | 3.06  | 1.92  | 0.12  |       |       |       | -     |
|           | 0.12       | -2.39      | 1.13  | -1.39 | -0.68 | -3.47 | -1.35 | -2    | -0.71 | -0.68 | 0.38  | 1.45  | 5.06  |
|           | 3.55       | 4.36       | 3.2   | 3.06  | 2.66  | 2.44  | 2.66  | 4.54  | 2.11  | 2.52  | 2.22  | 1.66  |       |
| GENE1544X | 14612_at   | 14612_at   | 1     | 1.16  | 1.59  | 2.69  | 2.43  | 1.63  | -0.34 |       |       |       | -     |
|           | 0.46       | -2.25      | 0.36  | -1.32 | -1.51 | -1.88 | -0.81 | -1.73 | -1.32 | -0.81 | 0.08  | 0.71  |       |

|           |            |            |       |       |       |       |       |       |       |       |       |       |   |
|-----------|------------|------------|-------|-------|-------|-------|-------|-------|-------|-------|-------|-------|---|
|           | 3.97       | 3.57       | 3.8   | 2.48  | 2.93  | 2.22  | 1.79  | 2.09  | 3.37  | 1.41  | 1.78  | 2.09  |   |
|           | 1.51       |            |       |       |       |       |       |       |       |       |       |       |   |
| GENE1543X | 12249_s_at | 12249_s_at | 1     | 1.02  | 0.54  | 1.19  | 1.33  | 0.53  | -0.15 | -     |       |       |   |
| 0.3       | -0.83      | -0.53      | -0.39 | -0.73 | -0.91 | -0.83 | -1.39 | 0.07  | -0.59 | -0.59 | 0.17  | 2.8   |   |
|           | 2.03       | 2.03       | 1.73  | 1.43  | 1.13  | 1.03  | 2.27  | 1.5   | 0.95  | 1.03  | 1.22  | 0.58  |   |
| GENE1542X | 14431_at   | 14431_at   | 1     | 1.69  | 0.17  | 0.54  | 0.71  | 0.84  | 0.25  | -     |       |       |   |
| 0.25      | -0.94      | 0.02       | -1.39 | -1.51 | -2.39 | -1.64 | -1.18 | -1.39 | -2.32 | -1.25 | -0.64 | 3.49  |   |
|           | 2.17       | 2.86       | 2.27  | 2.66  | 2.36  | 1.8   | 3.55  | 3.79  | 1.72  | 1.58  | 0.76  | -0.08 |   |
| GENE1541X | 15683_s_at | 15683_s_at | 1     | 0.82  | 0.04  | 0.44  | 0.51  | -0.16 | 0.02  | -     |       |       |   |
| 0.05      | -0.13      | -0.62      | -0.73 | -0.81 | -0.73 | -0.81 | -0.66 | -0.01 | -0.49 | -0.41 | 0.25  | 1.63  |   |
|           | 1.75       | 2.28       | 0.93  | 1.55  | 1.09  | 0.45  | 1.2   | 1.98  | 1.1   | 0.97  | 0.89  | 0.4   |   |
| GENE1540X | 16761_at   | 16761_at   | 1     | 0.87  | -0.32 | 0.26  | 0.84  | 0     | -0.04 | -     |       |       |   |
| 1.32      | -1.59      | -0.47      | 0.26  | 0.48  | -0.59 | -0.32 | -1.32 | 1.13  | -0.26 | -0.86 | 0.26  | 2.43  |   |
|           | 1.94       | 2          | 0.45  | 1.73  | 1.41  | 1.62  | 1.26  | 2     | 1.13  | 1.13  | 2     | 1.36  |   |
| GENE1539X | 17579_s_at | 17579_s_at | 1     | 0.84  | -0.08 | 0.07  | 0.85  | 0     | -0.16 | -     |       |       |   |
| 0.73      | -0.81      | -0.64      | -0.41 | -0.41 | -0.83 | -0.81 | -1.32 | -0.41 | -0.39 | -0.21 | 0.65  | 1.98  |   |
|           | 2.06       | 2.04       | 0.85  | 2.17  | 1.82  | 1.13  | 1.28  | 1.29  | 0.57  | 0.51  | 0.79  | 0.4   |   |
| GENE1538X | 16077_s_at | 16077_s_at | 1     | 1.05  | 0.09  | 0.2   | 0.79  | -0.01 | -0.07 | -     |       |       |   |
| 0.62      | -0.78      | -0.68      | -0.3  | -0.43 | -0.81 | -0.86 | -1.18 | 0.11  | -0.41 | -0.21 | 0.64  | 1.96  |   |
|           | 1.94       | 2.11       | 1.27  | 1.9   | 1.51  | 0.79  | 1.14  | 1.37  | 0.62  | 0.63  | 0.73  | 0.32  |   |
| GENE1537X | 13625_s_at | 13625_s_at | 1     | 0.53  | -0.53 | -0.35 | -0.23 | -0.35 | -0.08 | -     |       |       |   |
| 0.47      | -0.51      | -0.26      | -0.2  | -0.02 | -0.43 | -0.47 | -0.59 | -0.02 | -0.45 | -0.25 | 0.63  | 1.63  |   |
|           | 1.51       | 1.66       | 0.48  | 1.47  | 1.2   | 0.77  | 0.91  | 1.16  | 0.71  | 0.79  | 0.52  | 0.22  |   |
| GENE1534X | 17990_at   | 17990_at   | 1     | 1.34  | 0.08  | 0.94  | 1.31  | 0.43  | -0.2  | -     |       |       |   |
| 0.26      | -0.81      | 0.16       | -1.39 | -0.64 | -1.32 | -1.18 | -1.35 | -0.68 | -0.21 | 0.35  | 0.41  | 2.15  |   |
|           | 2.14       | 1.97       | 1.37  | 1.96  | 1.2   | 0.92  | 0.84  | 0.72  | 0.36  | 0.76  | 0.64  | 0.58  |   |
| GENE1533X | 18967_s_at | 18967_s_at | 1     | 1.23  | 0.16  | 1.13  | 0.98  | 0.02  | -0.53 | -     |       |       |   |
| 0.57      | -0.97      | -0.21      | -1.51 | -0.83 | -1.21 | -0.94 | -1.59 | -0.51 | -0.32 | -0.12 | 0.08  | 1.81  |   |
|           | 2.06       | 1.76       | 0.99  | 1.99  | 1.51  | 1.36  | 0.36  | -0.13 | 0.32  | 0.34  | 0.58  | 0.69  |   |
| GENE1532X | 17991_g_at | 17991_g_at | 1     | 1.03  | 0.15  | 1.15  | 1.32  | -0.08 | -0.59 | -     |       |       |   |
| 0.64      | -1.32      | -0.32      | -2    | -0.83 | -1.05 | -1.12 | -1.78 | -0.55 | -0.28 | 0.15  | 0.22  | 2.03  |   |
|           | 2.12       | 1.8        | 1.04  | 1.81  | 1.31  | 1.08  | 0.71  | 0.8   | 0.29  | 0.56  | 0.66  | 0.74  |   |
| GENE1531X | 12790_s_at | 12790_s_at | 1     | 0     | -1.05 | 0.85  | 1.32  | -0.51 | -0.73 | -     |       |       |   |
| 0.43      | -1.43      | -0.37      | -2.55 | -0.45 | -2.18 | -1.64 | -2.83 | -0.97 | -0.73 | 0.01  | 1.09  | 1.71  |   |
|           | 1.79       | 1.85       | 1.2   | 1.77  | 1.84  | 0.43  | 0.68  | 0.02  | 0.16  | -0.12 | 0.12  | -0.1  |   |
| GENE1297X | 12293_at   | 12293_at   | 1     | 0.62  | -0.34 | 0.66  | 0.45  | 0.53  | 0.23  |       |       |       |   |
|           | 0.02       | -0.68      | -0.37 | -1.78 | -1.08 | -1.55 | -1.35 | -0.68 | -1.69 | -0.97 | -1.08 | -0.05 |   |
|           | 0.91       | 1.48       | 1     | 0.95  | 0.95  | 1     | 0.54  | 0.74  | 0.37  | 0.37  | 0.35  | 0.84  |   |
|           | 0.56       |            |       |       |       |       |       |       |       |       |       |       |   |
| GENE1530X | 12801_at   | 12801_at   | 1     | 0.89  | -0.71 | 0.84  | 1.8   | -0.15 | -0.39 | -     |       |       |   |
| 1.21      | -1.28      | -0.91      | -2.05 | -1.02 | -1.83 | -1.51 | -2.25 | -0.78 | -0.73 | -0.26 | 1.06  | 2.8   |   |
|           | 2.09       | 2.7        | 1.01  | 2.03  | 1.68  | 1.02  | 1.9   | 2.13  | 1.4   | 1.26  | 0.82  | 0.38  |   |
| GENE1529X | 20590_at   | 20590_at   | 1     | 0.57  | -1    | -0.28 | 0.76  | -0.94 | -0.3  | -     |       |       |   |
| 1.69      | -1.35      | -1.02      | -1.39 | -0.59 | -1.05 | -1.12 | -1.88 | -0.68 | -0.62 | -1.02 | 0.86  | 2.31  |   |
|           | 1.96       | 2.28       | 0.69  | 1.31  | 1.15  | 0.87  | 1.23  | 1.14  | 0.86  | 0.85  | 0.65  | 0.2   |   |
| GENE1294X | 18844_at   | 18844_at   | 1     | 0.07  | -0.07 | 0.2   | 1.12  | 0.35  | -0.28 | -     |       |       |   |
| 0.68      | -1.43      | 0.05       | -1.39 | 0.18  | -1.51 | -0.76 | -1.08 | -1.25 | -0.68 | -0.2  | 1     | 3.02  |   |
|           | 0.73       | 0.97       | 1.29  | 0.97  | 0.93  | 0.6   | 1.54  | 1.52  | 0.5   | 0.44  | 0.37  | 0.25  |   |
| GENE1240X | 19471_at   | 19471_at   | 1     | 0.05  | -0.66 | 0.54  | 0.73  | -0.28 | -0.73 | -     |       |       |   |
| 1.15      | -1         | -1.12      | -0.34 | -0.37 | -1    | -0.73 | -2    | -0.08 | -0.66 | -1.21 | 0.07  | 0.55  |   |
|           | 0.51       | 0.81       | 0.31  | 0.64  | 0.76  | 0.38  | 0.68  | 0.22  | 0.22  | 0.08  | 0.41  | -0.08 |   |
| GENE1239X | 14947_at   | 14947_at   | 1     | -0.64 | 0.07  | 0.44  | 0.74  | -1.05 | -1.08 | -     |       |       |   |
| 1.28      | -1.55      | -0.62      | -0.71 | -1    | -0.68 | -0.62 | -1.73 | -1.12 | -0.66 | -0.18 | -0.78 | 0.27  |   |
|           | 1.18       | 1.69       | -0.32 | 1.13  | 1.02  | 0.46  | 1.02  | 1.47  | 0.62  | 0.09  | 0.58  | 0.09  |   |
| GENE1546X | 16365_at   | 16365_at   | 1     | 2.8   | -3.32 | 0     | 0     | -1.73 | 0.17  | -     |       |       |   |
| 5.64      | -2.05      | 1.26       | 0     | 0     | -3.32 | -3.32 | -0.59 | 0     | 0     | 0     | 0     | 4.01  | 0 |
|           | 0          | 1.45       | 4.05  | 3.86  | 4.45  | 3.2   | 0     | 0     | 0     | 0     | 0     |       |   |



|           |            |            |       |       |       |       |       |       |       |       |       |       |   |
|-----------|------------|------------|-------|-------|-------|-------|-------|-------|-------|-------|-------|-------|---|
| GENE1112X | 12949_at   | 12949_at   | 1     | 0.65  | -0.71 | 0.48  | -0.28 | -0.57 | -0.25 | -     |       |       |   |
| 1.02      | -0.47      | 0.28       | -1.05 | -0.1  | -0.86 | -0.53 | -0.37 | 0.74  | 0.47  | 0.49  | 0.22  | -0.47 |   |
|           | 0.02       | 0          | -0.3  | 0.93  | 1.26  | 1.19  | 0.04  | 0.16  | 0     | 0.16  | 1.21  | -1.51 |   |
| GENE1517X | 17207_at   | 17207_at   | 1     | -0.2  | -1.05 | 0.2   | 0.78  | 0.96  | -0.13 | -     |       |       |   |
| 0.73      | -1.78      | 1.55       | 0.61  | 1.88  | 0.26  | 0.5   | -0.26 | 0.22  | 0.48  | 1.02  | 1.72  | 2.7   |   |
|           | 0.54       | 0.52       | 2.6   | 1.26  | 1.64  | 1.58  | 2.77  | 0.91  | 1.39  | 0.87  | 1     | -0.02 |   |
| GENE1516X | 19926_at   | 19926_at   | 1     | 1.37  | -0.12 | -0.68 | 0     | 0.45  | 0.08  |       |       |       |   |
|           | 1.7        | 0.32       | 0.9   | -0.68 | 0     | -1.12 | -0.71 | 0.8   | -0.41 | 0.26  | 1.43  | 0.84  |   |
|           | 3.9        | 4          | 3.07  | 4.04  | 1.76  | 1.96  | 2     | 3.87  | 2.71  | 2.71  | 2.47  | 3.1   |   |
|           | 2.04       |            |       |       |       |       |       |       |       |       |       |       |   |
| GENE1515X | 17317_at   | 17317_at   | 1     | 1.64  | 0.34  | -0.35 | -0.66 | -0.1  | 0.16  | -     |       |       |   |
| 0.18      | -0.37      | 1.45       | -0.64 | -0.3  | 0.23  | 0     | 0.63  | -0.49 | 1.9   | 2.52  | 0.34  | 2.06  |   |
|           | 4.01       | 3.45       | 3.03  | 2.44  | 2.89  | 3.33  | 2.38  | 2.58  | 2.58  | 2.62  | 2.67  | 2.32  |   |
| GENE1514X | 14751_at   | 14751_at   | 1     | -0.16 | -0.55 | -0.32 | -0.04 | 0.4   | -0.13 | -     |       |       |   |
| 1.18      | -1.15      | 0.27       | -0.26 | -0.39 | -0.78 | -0.68 | -1.43 | -0.05 | -0.62 | -0.3  | -0.62 | 1.42  |   |
|           | 1.36       | 1.22       | 2.19  | 1.36  | 1.43  | 1.5   | 2.33  | 1.96  | 1.7   | 1.48  | 1.03  | 0.65  |   |
| GENE1513X | 20608_s_at | 20608_s_at | 1     | -0.49 | -0.86 | 0     | 0     | -0.86 | -0.86 | -     |       |       |   |
| 0.49      | -0.49      | 0.52       | 0     | 0     | -0.86 | -0.86 | 0.5   | 0     | -0.49 | 0.18  | 0     | 1.13  |   |
|           | 2.32       | 1          | 2.85  | 1.18  | 1.87  | 2.23  | 4.15  | 1.67  | 2.26  | 1.26  | 3.53  | 1.58  |   |
| GENE1512X | 19195_at   | 19195_at   | 1     | -1    | -1.43 | 0     | 0.26  | -1.18 | -2.32 | -     |       |       |   |
| 0.26      | -1.88      | 0.21       | 0     | 0     | -1.69 | -1.69 | -0.37 | 0     | -1    | 0     | 0     | 2.43  |   |
|           | 2.17       | 2.76       | 2.31  | 1.18  | 1.73  | 1.95  | 3.88  | 3.43  | 3.63  | 2.92  | 2.62  | 1.63  |   |
| GENE1511X | 14964_at   | 14964_at   | 1     | 0.82  | -0.41 | -1.83 | 2.96  | 0.07  | -0.01 | -1    |       |       |   |
|           | -2.39      | 1.1        | -0.64 | 3.86  | -1.12 | -0.68 | -0.49 | -0.34 | 0.59  | 0.91  | 3.67  | 6.14  | 2 |
|           | 3.75       | 2.38       | 2.03  | 1.89  | 2.19  | 3.16  | 4.63  | 3.75  | 4.16  | 1.88  | 1.7   |       |   |
| GENE1510X | 17068_at   | 17068_at   | 1     | 1     | -0.62 | -0.2  | 1.37  | -1.05 | -0.68 | -     |       |       |   |
| 1.28      | -1.28      | -0.62      | 1.32  | 1.48  | 0.21  | -0.05 | -0.86 | -0.2  | 0.53  | 0.07  | 1.48  | 2.84  |   |
|           | 1.5        | 1.13       | -0.2  | 0.97  | 0.79  | 1.17  | 0.23  | 1.76  | 1.13  | 1     | 0.8   | 0.58  |   |
| GENE1509X | 17499_s_at | 17499_s_at | 1     | 0.78  | -1.08 | -0.15 | 1     | -1.21 | -0.59 | -     |       |       |   |
| 1.47      | -1.08      | -0.68      | 0.4   | 1.05  | -0.57 | -0.73 | -0.57 | 0.34  | 0.28  | 0.32  | 2.14  | 3.18  |   |
|           | 1.2        | 1.89       | 0.07  | 0.41  | 0.44  | 0.65  | 0.21  | 1.76  | 1.03  | 1.54  | 0.6   | 0.82  |   |
| GENE1291X | 13432_at   | 13432_at   | 1     | 0.09  | -0.66 | -1.47 | -0.91 | -0.81 | -0.3  | -     |       |       |   |
| 0.83      | -1.43      | -0.25      | -0.73 | -0.16 | -1.64 | -0.91 | -1.12 | -0.23 | -0.81 | -0.32 | 0.58  | 3.26  |   |
|           | 1.27       | 0.94       | 0.98  | 0.38  | 0.91  | 1.29  | 0.7   | 2.09  | 1.58  | 1.48  | 0.96  | 0.46  |   |
| GENE1290X | 20232_s_at | 20232_s_at | 1     | -0.64 | -1.59 | -1    | -1    | -1    | -0.81 | -     |       |       |   |
| 1.55      | -2.55      | -0.43      | 0     | 0.18  | -1.08 | -1.25 | -1.47 | -1    | -0.81 | -0.28 | 0.43  | 3.13  |   |
|           | 0.96       | 1.67       | 0.23  | 0.42  | 0.29  | 1.07  | 0.85  | 2.13  | 2.28  | 2.02  | 0.78  | 0.64  |   |
| GENE1526X | 13695_at   | 13695_at   | 1     | -0.41 | 0.13  | 0.2   | 1.09  | -0.62 | 0.21  | -     |       |       |   |
| 0.18      | -0.12      | -0.94      | 0.01  | -0.04 | 0.26  | 0     | -0.73 | 0.48  | -0.23 | 0.07  | 1.02  | 1.52  |   |
|           | 0.78       | 2.61       | -0.68 | 1.02  | 0.63  | 0.04  | 0.18  | 1.09  | 0.38  | 0.65  | 0.12  | 0.44  |   |
| GENE1525X | 16151_at   | 16151_at   | 1     | 0.22  | -1    | -0.05 | 0.51  | -0.51 | -0.05 | -     |       |       |   |
| 0.97      | -0.91      | 0.09       | -0.49 | 0.36  | -0.35 | -0.43 | -1.05 | 0.4   | -0.3  | -0.25 | 1.09  | 1.75  |   |
|           | 1.37       | 1.44       | 0.91  | 1.07  | 0.97  | 0.36  | 0.92  | 0.53  | 0.13  | 0.15  | -0.13 | 0.21  |   |
| GENE1524X | 13806_at   | 13806_at   | 1     | 0.36  | 0.07  | -0.53 | 0.41  | -0.81 | -0.68 | -     |       |       |   |
| 1.59      | -1.05      | 0.23       | 0.04  | 0.46  | -0.3  | -0.26 | -0.12 | 0.68  | 0     | 0.62  | 1.38  | 2.55  |   |
|           | 2.26       | 2.82       | 0.43  | 1.59  | 1.48  | 0.75  | 0.67  | 1.66  | -0.15 | 0.62  | -0.23 | 0.26  |   |
| GENE1523X | 17886_at   | 17886_at   | 1     | 0.51  | -0.68 | -0.97 | 0.42  | -1.25 | -0.37 | -     |       |       |   |
| 2.55      | -1.39      | 0.05       | -0.39 | 0.33  | -0.12 | -0.2  | -1    | 0.31  | 0.42  | 0.54  | 2.01  | 1.89  |   |
|           | 3.14       | 2.39       | 0.17  | 2.55  | 2.56  | 0.46  | 0.17  | 0.34  | 0.34  | 0.66  | 0.12  | 0.37  |   |
| GENE1518X | 15039_at   | 15039_at   | 1     | 0     | -0.28 | -0.78 | 0.7   | -1.08 | -0.66 | -     |       |       |   |
| 0.55      | -0.25      | -0.26      | -0.37 | 0.78  | -0.25 | -0.1  | 0.23  | -0.15 | -0.15 | 0.36  | 1.26  | 1.33  |   |
|           | 2.03       | 1.69       | -0.07 | 1.48  | 1.43  | 0.07  | -0.02 | -0.04 | -0.41 | 0     | -0.21 | 0.37  |   |
| GENE1325X | 16690_g_at | 16690_g_at | 1     | -0.62 | -0.23 | -0.1  | 0.27  | -0.39 | -0.28 | -     |       |       |   |
| 1.18      | -0.78      | 0.34       | 0.62  | 1.17  | -0.23 | -0.47 | -0.37 | -0.1  | -0.07 | 0.17  | -1.43 | 1.2   |   |
|           | 0.52       | 1.04       | 0.08  | 0.62  | 0.22  | -0.34 | 0.41  | 0.45  | -0.02 | 0.07  | 1     | 0.65  |   |

|           |            |            |       |       |       |       |       |       |       |       |       |       |       |
|-----------|------------|------------|-------|-------|-------|-------|-------|-------|-------|-------|-------|-------|-------|
| GENE1324X | 18034_s_at | 18034_s_at | 1     | -0.78 | -0.59 | -0.83 | -0.18 | -0.76 | -0.55 | -     |       |       |       |
| 1.05      | -0.73      | -0.16      | 0.45  | 0.18  | -0.18 | -0.51 | -0.21 | 0.01  | -0.1  | -0.12 | 0.23  | 0.43  |       |
|           | 1.25       | 1.02       | -0.35 | 0.65  | 0.23  | -0.25 | 0.07  | 0.62  | 0.02  | 0.04  | 0.29  | 0.04  |       |
| GENE1776X | 12627_at   | 12627_at   | 1     | 0.94  | -0.12 | 0.15  | 0.09  | 0.29  | 1.05  | -     |       |       |       |
| 0.08      | 0.01       | 0.13       | -1.28 | -0.39 | -0.78 | -0.64 | -0.64 | -0.39 | -0.21 | -0.26 | 0.2   | 0.44  |       |
|           | 0.52       | 0.64       | 1.23  | 0.42  | 0.53  | 0.48  | 0.02  | -0.88 | 0.11  | -0.04 | -0.28 | -0.39 |       |
| GENE1775X | 16702_at   | 16702_at   | 1     | 1.36  | 0.25  | -0.1  | 0.34  | 0.2   | 1.02  |       |       |       |       |
| 0.29      | 0.2        | 0.02       | -1    | -0.41 | -0.57 | -0.34 | -0.45 | -0.76 | -0.28 | 0.02  | -0.1  |       |       |
|           | 0.97       | 0.4        | 0.4   | 0.86  | 0.16  | 0.18  | 0.11  | -0.18 | 0.11  | 0.07  | 0.02  | -0.07 |       |
|           | 0.02       |            |       |       |       |       |       |       |       |       |       |       |       |
| GENE1560X | 19207_at   | 19207_at   | 1     | 0.41  | 0.93  | 0.63  | 0.58  | 1.65  | 1.58  |       |       |       |       |
| 0.02      | 0.04       | 0.47       | -0.97 | -0.88 | -0.34 | -0.13 | -0.47 | -0.13 | -0.83 | -0.47 | 0.02  |       |       |
|           | 1.22       | 1.91       | 0.61  | 1.83  | 1.25  | 1.33  | 1.34  | 1.61  | 0.53  | 0.16  | 0.02  | 0.76  |       |
|           | 0.46       |            |       |       |       |       |       |       |       |       |       |       |       |
| GENE1559X | 18174_at   | 18174_at   | 1     | 0.69  | -0.28 | 0.47  | 0.23  | 1.22  | 1.17  | -     |       |       |       |
| 0.55      | 0.29       | 0.93       | -0.83 | -0.76 | -0.78 | -0.43 | -0.47 | -0.13 | -0.86 | -0.23 | -0.3  | 1.06  |       |
|           | 1.1        | 0.68       | 1.14  | 0.91  | 1     | 0.65  | 0.37  | 0.41  | -0.47 | 0     | 0.75  | 0.29  |       |
| GENE1558X | 15461_at   | 15461_at   | 1     | 0.58  | -0.13 | -0.86 | -0.41 | 0.26  | 1.29  | -     |       |       |       |
| 0.26      | 0.87       | 0.34       | -0.3  | -0.83 | -0.16 | -0.3  | 0.05  | -0.62 | -0.41 | 0.07  | 0.27  | 0.53  |       |
|           | 0.85       | 0.42       | 1.04  | 0.97  | 0.8   | 0.4   | 0.46  | 0.21  | 0.05  | 0.33  | 0.32  | -0.04 |       |
| GENE1555X | 17368_at   | 17368_at   | 1     | 2.45  | 0.86  | -1.28 | -0.59 | 0.47  | 1.2   |       |       |       |       |
| 0.01      | -0.49      | 0          | -1.28 | -0.37 | -0.94 | 0.43  | 0.07  | -0.78 | 0.58  | 0.21  | 0     | -     |       |
|           | 0.86       | 1.92       | 1.37  | 0.75  | 1.07  | 1.15  | 0.52  | -0.68 | 0.84  | 0     | 0     | 0.48  |       |
| GENE1554X | 12822_at   | 12822_at   | 1     | 0.49  | -0.34 | -0.07 | -0.57 | -0.12 | 0.34  |       |       |       |       |
| 0.08      | 0.26       | 0.22       | -0.88 | -0.43 | -0.39 | -0.21 | 0.11  | -0.57 | 0.16  | 0.29  | -0.23 | -     |       |
|           | 0.23       | 0.94       | 0.77  | 0.4   | 1.05  | 0.59  | 0.28  | 0.15  | -0.13 | 0     | 0.11  | 0     | -0.15 |
| GENE1422X | 16358_s_at | 16358_s_at | 1     | -0.23 | 0.35  | -0.05 | -0.76 | 0     | 1.43  |       |       |       |       |
| 0.12      | 0.85       | 0.13       | -0.86 | -0.49 | 0     | -0.12 | 0.62  | 0.04  | -0.3  | 0.23  | -0.76 |       |       |
|           | 0.2        | 0.7        | 1.58  | 0.8   | -0.49 | -0.15 | 0.27  | -0.23 | 0.23  | 0.32  | 0.64  | 0.12  |       |
|           | 0.44       |            |       |       |       |       |       |       |       |       |       |       |       |
| GENE1409X | 16660_at   | 16660_at   | 1     | 0     | -0.15 | 0.08  | -0.55 | -0.64 | -0.39 | -     |       |       |       |
| 0.39      | -0.25      | 3.42       | -0.55 | -1    | -0.51 | -0.32 | -0.91 | 0.08  | 0.12  | 0.12  | -0.37 | 0.17  |       |
|           | 0.93       | 1.32       | -0.08 | 0.44  | 0.7   | -1.15 | 0.12  | 0.77  | 0     | 0.27  | -0.13 | 0.32  |       |
| GENE1302X | 14631_s_at | 14631_s_at | 1     | -0.97 | -1.64 | 0.77  | -0.05 | 0.84  | -0.15 | -     |       |       |       |
| 0.66      | -1.02      | 0.42       | -2.94 | -1.43 | -2.94 | -2.05 | -2    | -3.83 | -1.21 | -0.55 | -0.78 | 1.21  |       |
|           | 0.37       | 0.91       | 1.94  | 1.42  | 1.74  | 1.36  | 2.29  | 1.94  | 1.41  | 0.85  | 1.17  | 0.31  |       |
| GENE1301X | 13900_s_at | 13900_s_at | 1     | -1.35 | -1.39 | 0.46  | -0.05 | 0.81  | -0.26 | -     |       |       |       |
| 0.25      | -1.05      | 0.13       | -3.18 | -1.35 | -2.83 | -1.43 | -2.12 | -2.25 | -1.35 | -0.64 | -1    | 1.13  |       |
|           | 0.57       | 0.87       | 1.86  | 1.4   | 1.85  | 1.44  | 2.38  | 1.88  | 1.26  | 0.87  | 1.25  | 0.41  |       |
| GENE1300X | 13539_i_at | 13539_i_at | 1     | -1.35 | -1.18 | 0.41  | -0.08 | 0.48  | -0.83 | -     |       |       |       |
| 0.64      | -1.18      | -0.07      | -1.39 | -0.94 | -2.32 | -1.55 | -1.64 | -1.83 | -1.43 | -0.73 | -1.08 | 1.31  |       |
|           | 0.34       | 0.79       | 1.55  | 1.28  | 1.81  | 1.44  | 2.53  | 1.84  | 1.31  | 0.71  | 1.34  | 0.37  |       |
| GENE1299X | 13538_at   | 13538_at   | 1     | -0.62 | -0.78 | 0.68  | 0     | 0.26  | 0.01  | -     |       |       |       |
| 0.66      | -1.12      | -0.57      | -1.73 | -1.88 | -2.39 | -2    | -2    | -1.64 | -1.64 | -1.18 | -0.71 | 0.72  |       |
|           | 1.09       | 1.36       | 1.68  | 1.79  | 1.83  | 1.3   | 2.05  | 0.96  | 0.25  | 0.01  | 0.73  | 0.12  |       |
| GENE1298X | 19696_at   | 19696_at   | 1     | -0.34 | -1.83 | 0.41  | -0.07 | 0.28  | -0.55 | -     |       |       |       |
| 0.45      | -2.12      | 0.05       | -0.86 | -1.32 | -3.18 | -2.64 | -1.39 | -0.86 | -1.78 | -1.39 | -0.73 | 1.13  |       |
|           | 0.71       | 0.29       | 1.91  | 0.91  | 1.02  | 1.16  | 1.8   | 0.97  | 0.73  | 0.58  | 0.73  | 0.32  |       |
| GENE1261X | 15046_s_at | 15046_s_at | 1     | -0.71 | 0.35  | -0.15 | 0.17  | 0.54  | -1.35 | -     |       |       |       |
| 0.12      | -1.39      | -0.39      | -2.12 | -1.15 | -1.28 | -1.25 | -1.02 | -1.05 | -1.21 | -0.81 | -0.59 | 1.18  |       |
|           | 0.08       | -0.05      | -0.13 | -0.18 | -0.21 | 0.08  | 0.65  | 1.11  | -0.04 | -0.1  | 0.29  | 0.21  |       |
| GENE1260X | 17089_s_at | 17089_s_at | 1     | -0.26 | 0     | 0.47  | -0.05 | 0.87  | -0.43 |       |       |       |       |
| 1.34      | 0.09       | 0.37       | -1.39 | -0.47 | -1.55 | -0.73 | -0.57 | -2    | -0.62 | 0.04  | -0.2  |       |       |
|           | 0.07       | 0.16       | -0.2  | 0.77  | 0.82  | 1.05  | 0.87  | 1.16  | 0.48  | 0.28  | 0.15  | 0.6   |       |
|           | 0.12       |            |       |       |       |       |       |       |       |       |       |       |       |
| GENE1259X | 17398_at   | 17398_at   | 1     | -0.45 | 0.28  | 1.23  | 0.41  | 0.11  | -0.18 |       |       |       |       |
| 1.05      | 0.49       | -0.32      | -0.86 | -0.07 | -1.47 | -1.18 | -0.35 | -0.73 | -0.59 | -0.25 | 0.12  |       |       |

|           |            |            |       |       |       |       |       |       |       |       |       |       |   |
|-----------|------------|------------|-------|-------|-------|-------|-------|-------|-------|-------|-------|-------|---|
| 0.62      | 0.21       | 0.28       | 0.44  | -0.32 | -0.07 | 0.12  | 0.92  | 0.91  | 0.51  | 0.36  | 0.17  |       |   |
| 0.05      |            |            |       |       |       |       |       |       |       |       |       |       |   |
| GENE1258X | 13067_s_at | 13067_s_at | 1     | -0.28 | -0.1  | 0.61  | -0.04 | 0.09  | -0.28 |       |       |       |   |
| 1.15      | 0.07       | -0.02      | -0.91 | -0.53 | -1.51 | -1.28 | -0.26 | -1.28 | -0.78 | -0.59 | -0.43 |       |   |
| 0.05      | 0.02       | 0.44       | 0.79  | 0.08  | 0.12  | 0.21  | 1.48  | 1.39  | 1.02  | 0.75  | 0.53  |       |   |
| 0.01      |            |            |       |       |       |       |       |       |       |       |       |       |   |
| GENE1257X | 16311_at   | 16311_at   | 1     | 0.87  | 0.22  | 2.23  | 1.05  | 0.07  | -0.37 |       |       |       |   |
| 1.04      | 0.32       | -1         | -1    | -1.73 | -2.55 | -2    | -0.64 | -1    | -1.28 | -0.97 | -0.83 |       |   |
| 1.33      | 0.63       | 1.23       | 0.54  | 0.08  | 0.42  | 0.05  | 1.66  | 1.34  | 0.87  | 0.65  | 0.91  |       |   |
| 0.33      |            |            |       |       |       |       |       |       |       |       |       |       |   |
| GENE1777X | 17589_at   | 17589_at   | 1     | 0.72  | -0.18 | 0.93  | 0.45  | 1.09  | 1.21  |       |       |       |   |
| 0.13      | -0.13      | 0.67       | -1.35 | -0.76 | -1.05 | -0.3  | -0.78 | 0.2   | -0.04 | 0.02  | 0.01  |       |   |
| 0.26      | -0.68      | 0.25       | 0.94  | 0.43  | 0.4   | -0.04 | -0.02 | 0.54  | 0.16  | -0.28 | -0.02 | -     |   |
| 0.43      |            |            |       |       |       |       |       |       |       |       |       |       |   |
| GENE1464X | 13324_at   | 13324_at   | 1     | -0.2  | 0.15  | 0.6   | 0.21  | 1.01  | 0.48  |       |       |       |   |
| 0.04      | -0.28      | 0          | -0.81 | -0.3  | -0.45 | -0.18 | -0.73 | -0.28 | -0.02 | -0.35 | 0.16  | 0     |   |
| -0.23     | -0.12      | 0.36       | -0.49 | -0.39 | -0.35 | -0.41 | 0.01  | 0.11  | -0.15 | -0.13 | -0.2  |       |   |
| GENE1463X | 13980_s_at | 13980_s_at | 1     | 0.63  | 0.2   | 0.29  | 0.76  | 1.05  | 0.04  |       |       | -     |   |
| 0.35      | -0.86      | -0.35      | -1.47 | -0.28 | -0.81 | -0.39 | -1.39 | -0.86 | -0.51 | -0.37 | -0.18 | -0.04 | - |
| 0.34      | -1         | 0.09       | 0     | 0.2   | 0.09  | 0     | -0.59 | -0.05 | -0.47 | -0.2  | 0     |       |   |
| GENE1462X | 12617_s_at | 12617_s_at | 1     | 0.6   | 0.47  | 0.55  | 0.2   | 0.23  | -0.21 |       |       |       |   |
| 0.2       | -0.37      | -0.71      | -1.59 | -0.66 | -0.76 | -0.35 | -1.02 | -0.57 | -0.07 | 0.23  | -0.35 | -     |   |
| 0.18      | 0          | -0.49      | 0     | -0.13 | -0.02 | -0.05 | 0.01  | -0.57 | -0.43 | -0.47 | -0.16 | -0.32 | - |
| GENE1461X | 15836_at   | 15836_at   | 1     | 0.55  | 0.38  | 0.54  | 0.66  | 0.5   | 0     |       |       |       | - |
| 0.2       | -0.34      | -0.37      | -0.91 | -0.57 | -0.59 | -0.35 | -1.28 | -0.37 | 0     | 0.43  | -0.78 | 0     | - |
| 0.37      | -0.3       | 0.23       | 0.38  | 0.67  | 0.51  | 0.17  | -0.86 | -0.28 | -0.34 | 0.17  | -0.08 |       |   |
| GENE1460X | 19759_at   | 19759_at   | 1     | -0.32 | -0.41 | 1.97  | 0.2   | 0.25  | -0.55 |       |       |       | - |
| 0.2       | -0.73      | -0.88      | -1.59 | -1.08 | -1.05 | -0.86 | -1.88 | 0.21  | -0.13 | 0.49  | -0.45 | -0.62 | - |
| 0.34      | -1.25      | -0.08      | 0     | 0.12  | 0.33  | 0.21  | -1    | -0.37 | -1    | -0.21 | -0.28 |       |   |
| GENE1506X | 16541_s_at | 16541_s_at | 1     | 0.94  | -0.16 | -0.97 | 0.58  | 0.84  | -0.07 |       |       |       | - |
| 0.94      | -1.12      | 0.01       | -0.76 | -0.26 | -0.25 | -0.25 | -0.88 | -0.41 | -0.57 | -0.97 | -0.02 | 0.51  | - |
| 0.64      | -0.12      | 0.96       | 0.32  | 0.08  | 0.26  | 0.7   | -0.55 | -0.62 | -0.83 | -0.57 | -0.47 |       |   |
| GENE1296X | 16323_at   | 16323_at   | 1     | -0.71 | -0.3  | 0.28  | 0.59  | 0.46  | -0.25 |       |       |       | - |
| 0.32      | -1.15      | -0.28      | -1.05 | 0.15  | -0.04 | 0.16  | -0.68 | -0.73 | -0.83 | -0.81 | 0.11  | 0.59  | - |
| 0.08      | 0          | 0.94       | 0.69  | 0.65  | 0.78  | 0.59  | -0.07 | 0.47  | 0.38  | -0.45 | -0.41 |       |   |
| GENE1295X | 16204_at   | 16204_at   | 1     | 0.11  | 0.27  | 0.72  | 0.79  | 0.42  | 0.18  |       |       |       | - |
| 0.66      | -0.97      | -0.3       | -0.59 | -0.43 | -0.57 | -0.37 | -1.18 | -0.26 | -0.51 | -0.53 | 0.2   | 1.44  |   |
| 0.48      | 0.45       | 0.43       | 0.31  | 0.16  | 0.2   | 0.91  | 0.29  | -0.3  | -0.26 | 0.28  | -0.07 |       |   |
| GENE1241X | 12419_at   | 12419_at   | 1     | 0.17  | 0.67  | 0.97  | 0.78  | 0.21  | -1.08 |       |       |       | - |
| 0.23      | -1.32      | -0.64      | -0.3  | -0.13 | -0.26 | -0.32 | -1.32 | -0.3  | -0.08 | -0.45 | -0.51 | 0.46  |   |
| 0.28      | 0          | 0.01       | -0.18 | 0.01  | -0.08 | 0.63  | 0.49  | -0.12 | -0.08 | 0.35  | 0.21  |       |   |
| GENE1256X | 14077_at   | 14077_at   | 1     | 0.27  | 1.05  | 1.33  | 3.01  | 0.45  | -1.32 |       |       |       |   |
| 1.23      | 0.04       | -2.47      | -2.18 | -2    | -0.57 | -1    | -1.83 | -0.37 | -2.83 | -2.25 | 0.84  |       |   |
| 1.76      | 0.36       | 2.55       | -0.68 | 1.12  | 1.09  | -0.43 | -0.41 | 0.01  | 0.08  | -0.32 | -1.94 | -     |   |
| 1.35      |            |            |       |       |       |       |       |       |       |       |       |       |   |
| GENE1255X | 14310_at   | 14310_at   | 1     | 0.37  | -0.57 | 1.54  | 1.34  | 0.86  | 0.6   |       |       |       |   |
| 0.65      | 0.32       | -1.08      | -2.32 | -1.15 | -1.64 | -1.32 | -2.12 | -1.15 | -1.73 | -1.39 | 0.36  |       |   |
| 0.76      | 0.8        | 1.76       | 1.87  | 1.62  | 1.22  | 0.68  | 0.63  | -0.3  | 0.56  | 0.41  | -1.21 | -     |   |
| 1.21      |            |            |       |       |       |       |       |       |       |       |       |       |   |
| GENE1254X | 12816_at   | 12816_at   | 1     | 0.41  | -0.51 | 0.9   | 0.86  | 0.27  | -0.34 |       |       |       | - |
| 0.26      | -1.05      | -0.88      | -2.05 | -1.59 | -1.69 | -1.51 | -2    | -1.35 | -1.32 | -1.21 | -0.49 | 0.79  | - |
| 0.15      | 0.77       | 1.09       | 1.07  | 0.89  | 0.41  | 0.67  | -0.08 | 0.33  | 0.04  | -0.53 | -0.81 |       |   |
| GENE1253X | 12817_g_at | 12817_g_at | 1     | 0.05  | -0.53 | 0.76  | 0.92  | 0.09  | -0.51 |       |       |       | - |
| 0.57      | -1.32      | -1.02      | -2.12 | -1.39 | -1.69 | -1.59 | -2.32 | -1.47 | -1.08 | -1.47 | -0.26 | 0.89  | - |
| 0.32      | 0.63       | 0.99       | 0.49  | 0.2   | 0.01  | 0.53  | -0.1  | 0.02  | 0.01  | -0.41 | -0.68 |       |   |



|           |            |            |       |       |       |       |       |       |       |       |       |       |       |
|-----------|------------|------------|-------|-------|-------|-------|-------|-------|-------|-------|-------|-------|-------|
| GENE1385X | 18876_at   | 18876_at   | 1     | -1.25 | -0.02 | -0.2  | -0.25 | 0.07  | -1.08 |       |       |       |       |
|           | 1.02       | 0.43       | -0.28 | 1.89  | 1.15  | 1.64  | 1.37  | 1.34  | 1.01  | -1.12 | -0.23 | 0.59  | -     |
|           | 1.69       | -1.08      | -1.08 | -0.59 | -1.21 | -1.15 | -0.78 | 0.52  | -0.66 | 0.44  | 0.91  | -0.55 | -0.97 |
| GENE1384X | 13705_at   | 13705_at   | 1     | -0.81 | -0.59 | -0.83 | 0.13  | -0.57 | -1.35 |       |       |       |       |
|           | 1.06       | 0.54       | -0.73 | 1.05  | 0.96  | 1.11  | 0.66  | 1.17  | 0.42  | -0.83 | -1.05 | 0.57  | -1    |
|           | -1.94      | -0.3       | -0.51 | 0.07  | -0.2  | -0.47 | -0.05 | -0.76 | 0.26  | 0.87  | -1.39 | -1.39 |       |
| GENE1383X | 16446_at   | 16446_at   | 1     | -0.91 | -0.07 | 0.2   | 0.08  | 0.25  | -0.32 |       |       |       |       |
|           | 0.55       | -0.01      | 0.6   | 0.85  | 0.59  | 0.65  | 0.58  | 1.11  | 0.53  | 0.02  | 0.18  | 0.35  | -     |
|           | 0.35       | -0.34      | -0.49 | 0.21  | -0.21 | -0.01 | 0.28  | 0.15  | 0.13  | -0.1  | 0     | 0     | 0.07  |
| GENE1382X | 17843_s_at | 17843_s_at | 1     | -1.47 | -0.12 | 1.11  | 2.22  | -1.88 | -0.86 | 2     |       |       |       |
|           | 2.63       | 1.07       | 2.91  | 2.27  | 2.27  | 2.41  | 3.94  | 2.55  | 0.92  | 0.2   | 1.53  | -0.07 | -     |
|           | 1.69       | -0.1       | -0.86 | 0.13  | 0.37  | 0.58  | 0.48  | -1.59 | 0.17  | -1.59 | -0.66 | -1.55 |       |
| GENE1381X | 17580_at   | 17580_at   | 1     | -0.51 | -0.34 | 0.16  | -0.94 | -0.68 | -0.47 |       |       |       |       |
|           | 0.7        | 0.93       | 0.15  | 0.91  | 0.09  | 0.52  | 0.44  | 1.14  | 0.07  | 0.34  | 0.88  | 0.04  | -     |
|           | 0.47       | -0.47      | -0.55 | -0.37 | -0.49 | -0.34 | -0.07 | 0.18  | 0.12  | 0.07  | -0.01 | 0.02  | -0.05 |
| GENE1380X | 17581_g_at | 17581_g_at | 1     | -1.12 | 0.25  | 0.84  | -1.05 | -1.02 | -0.73 |       |       |       |       |
|           | 2.14       | 2.56       | 0.11  | 2.2   | 0.33  | 1.2   | 0.91  | 3.33  | 1.2   | 0.34  | 0.69  | 0.04  | -     |
|           | 0.55       | -0.94      | -0.73 | -0.55 | -0.86 | -0.73 | -0.41 | 0.09  | 0.08  | 0     | -0.05 | 0     | 0.07  |
| GENE1379X | 14298_g_at | 14298_g_at | 1     | -1.47 | -0.3  | 0.9   | -0.81 | -1.05 | -0.76 |       |       |       |       |
|           | 1.36       | 1.87       | 0.04  | 2.3   | 0.49  | 0.87  | 0.26  | 2.05  | 1.17  | 0.28  | 0.53  | -0.35 | -     |
|           | 0.47       | -0.43      | -0.41 | -0.49 | -0.83 | -0.76 | -0.34 | 0.6   | 0.31  | -0.23 | 0.25  | 0.25  | 0.51  |
| GENE1378X | 15868_at   | 15868_at   | 1     | -0.62 | -0.35 | -1.25 | -1.39 | 0.04  | 0.42  | -     |       |       |       |
|           | 0.91       | -0.53      | 1.19  | 1.47  | 1     | 0.84  | 0.73  | 1.16  | 0.59  | 0.56  | 0.7   | 0.44  | -0.59 |
|           | 0.04       | -0.62      | 0.27  | -0.08 | 0.09  | 0.59  | 0.68  | -0.39 | -0.1  | 0.01  | 0.26  | 0.2   |       |
| GENE1377X | 13026_at   | 13026_at   | 1     | 0     | -0.45 | -1.18 | -0.28 | -0.04 | -0.81 | -     |       |       |       |
|           | 0.45       | -1.02      | 1.32  | 1.37  | 1.68  | 1.39  | 0.91  | 1.28  | 1.02  | 1.69  | 0.94  | 1.02  | 0.43  |
|           | 0.91       | -0.28      | -0.41 | 0.61  | 0.72  | 0.52  | -0.26 | -0.66 | -0.16 | -0.28 | -0.16 | 0.26  |       |
| GENE1376X | 12186_at   | 12186_at   | 1     | -0.49 | 0.25  | -1.18 | -0.76 | -0.32 | -0.45 | -     |       |       |       |
|           | 0.83       | -1.25      | 0.57  | 0.59  | 1.19  | 0.91  | 0.78  | 0.28  | 0.61  | 0.8   | 0.44  | 0.65  | -0.73 |
|           | 0.18       | -0.28      | -0.16 | -0.3  | -0.2  | 0.32  | 0.16  | -0.1  | -0.32 | 0.05  | -0.43 | 0.17  |       |
| GENE1375X | 20456_at   | 20456_at   | 1     | -0.49 | -1.28 | -1.83 | -0.35 | -0.37 | -0.73 | -     |       |       |       |
|           | 0.81       | -1.12      | 0.9   | 0.85  | 1.44  | 0.58  | 0.34  | 0.08  | 0.45  | 1.11  | 0.58  | 0.68  | -0.39 |
|           | 0.57       | -1.55      | -0.25 | -0.62 | -0.16 | 0.4   | -0.07 | -0.97 | -0.34 | -0.13 | 0.05  | 0.35  |       |
| GENE1374X | 13660_i_at | 13660_i_at | 1     | -0.3  | -0.28 | -1.69 | 0.07  | -0.59 | -0.91 | -     |       |       |       |
|           | 0.49       | -0.49      | -0.73 | 1.08  | 0.72  | -0.34 | -0.28 | 0.77  | 0.94  | 0.15  | 0.04  | 0.92  | -1    |
|           | 0.04       | -0.73      | -0.91 | 1.07  | 1.13  | 0.97  | 0     | -1.02 | 0.07  | -0.25 | 0.28  | -0.08 |       |
| GENE1364X | 15125_f_at | 15125_f_at | 1     | 1.59  | 3.67  | 0.43  | 0.15  | -2.05 | -2.94 | -     |       |       |       |
|           | 0.55       | -1.21      | -0.97 | 0.5   | -0.3  | 2.38  | 1.13  | 0.66  | 0.75  | 2.16  | 0     | -0.49 | -0.07 |
|           | 1.51       | -0.23      | -3.18 | -0.45 | -1.43 | -1.28 | -1    | -0.76 | -0.2  | -0.91 | -1.21 | 0.13  |       |
| GENE1363X | 15141_s_at | 15141_s_at | 1     | 2.01  | 2.16  | -0.64 | 0.05  | -2.25 | -3.32 | -     |       |       |       |
|           | 1.32       | -0.78      | -0.59 | 0.69  | -0.05 | 2.1   | 1.17  | 0.49  | 0.55  | 2.19  | 0.5   | -0.55 | -0.35 |
|           | -0.18      | -3.83      | -1.21 | -1.69 | -0.73 | -1.15 | -1    | -0.37 | -0.49 | -0.47 | 0.45  |       |       |
| GENE1362X | 13949_at   | 13949_at   | 1     | 1.5   | 1.09  | -1.25 | -0.2  | -2.64 | -3.64 | -     |       |       |       |
|           | 2.18       | -2         | -0.91 | 0.48  | 0.97  | 2.6   | 2.51  | -0.18 | 0.76  | 2.45  | 0.25  | 0.38  | -0.1  |
|           | 0.55       | -0.12      | -2.94 | -0.45 | -1.12 | 0     | -0.62 | -0.91 | -0.39 | -0.05 | -0.21 | 0.59  |       |
| GENE1348X | 17600_s_at | 17600_s_at | 1     | -0.08 | 0.15  | -0.76 | 0.44  | -0.1  | -0.94 | -     |       |       |       |
|           | 1.02       | -0.94      | 0.84  | 0.98  | 1.13  | 1.46  | 1.27  | 0.79  | 0.71  | 0.8   | 0.54  | 0.9   | 0.01  |
|           | 0.01       | 0.28       | -1.02 | 0.27  | 0.02  | -0.15 | 0.47  | 0.47  | -0.1  | 0.16  | 0.07  | 0.23  |       |
| GENE1347X | 14984_s_at | 14984_s_at | 1     | -0.08 | 0.77  | -0.83 | -0.16 | -0.76 | -1.15 | -     |       |       |       |
|           | 0.83       | -0.25      | 0.47  | 0.91  | 1.05  | 1.18  | 0.76  | 0.83  | 0.35  | 1.41  | 1.09  | 0.61  | -0.47 |
|           | 0.26       | -0.28      | -1.21 | 0     | -0.32 | -0.07 | 0.23  | 0.12  | -0.13 | 0.08  | 0.09  | 0.27  |       |
| GENE1346X | 12587_at   | 12587_at   | 1     | 0.26  | 0     | -1.21 | 0     | -1.73 | -1.21 | -1    |       |       |       |
|           | -0.26      | 1.15       | 2.68  | 3.04  | 2.78  | 2.77  | 1.2   | 2.02  | 1.87  | 1.73  | 1.45  | -0.68 |       |
|           | 0.22       | -0.37      | -1.21 | -0.45 | -0.94 | -0.35 | -0.35 | -0.88 | -0.64 | 0     | 0.15  | 0.43  |       |
| GENE1345X | 15574_s_at | 15574_s_at | 1     | -0.62 | 0     | -0.73 | -0.37 | -1.43 | -1.25 | -     |       |       |       |
|           | 0.51       | -0.43      | -0.18 | 1.21  | 1.18  | 1.13  | 1.13  | 0.94  | 0.6   | 0.67  | 0.34  | 0.2   | 0.01  |
|           | 0.08       | 0.26       | -1.69 | -0.51 | -0.41 | -0.66 | 0.15  | 0.93  | 0.49  | 0.58  | -0.04 | 0.08  |       |

|           |            |            |       |       |       |       |       |       |       |       |       |       |       |   |
|-----------|------------|------------|-------|-------|-------|-------|-------|-------|-------|-------|-------|-------|-------|---|
| GENE1365X | 15483_s_at | 15483_s_at | 1     | -0.35 | 0.43  | -1.83 | 0.64  | -0.64 | -0.57 | -     |       |       |       |   |
|           | 0.25       | 0.09       | 0.12  | 0.52  | 1.83  | 0.81  | 0.66  | 0.11  | 0.23  | 0.26  | -0.3  | 1.53  | 0.86  | - |
|           | 0.32       | -0.47      | -1.43 | -1.39 | -2.73 | -1.47 | -1.78 | 0.02  | -0.07 | 0.09  | -0.55 | 0.96  |       |   |
| GENE1368X | 16427_at   | 16427_at   | 1     | 0.02  | 0.16  | -0.35 | 0.29  | -0.1  | -0.2  | -     |       |       |       |   |
|           | 0.81       | -1.02      | -0.07 | 0.37  | 0.57  | 1.18  | 0.43  | -0.12 | 0.26  | 0.26  | -0.04 | 0.49  | -0.53 | - |
|           | 0.66       | 0.04       | -0.23 | -0.26 | -0.55 | -0.25 | -0.53 | -0.25 | -0.1  | 0.15  | -0.78 | -0.23 |       |   |
| GENE1367X | 15975_s_at | 15975_s_at | 1     | -0.25 | 0.18  | -0.47 | 0.02  | 0.01  | -1.51 | -1    |       |       |       |   |
|           | -0.91      | 0.07       | 0.33  | 1.07  | 1.13  | 1.08  | 0.41  | 0.31  | 1.08  | -0.25 | 0.69  | -0.55 | -2    |   |
|           | -0.25      | -1.51      | -1.32 | -1.51 | -1.32 | -1.25 | -0.49 | -0.76 | 0.17  | -0.62 | -0.04 |       |       |   |
| GENE1366X | 20227_s_at | 20227_s_at | 1     | 1.22  | 2.28  | -1.35 | 0.28  | -1.08 | -2.25 | -     |       |       |       |   |
|           | 1.39       | -0.59      | 0.23  | 1.19  | 1.37  | 2     | 2.4   | 2     | 1.65  | 1.59  | 0.34  | 1.32  | -0.62 | - |
|           | 1.51       | 0          | -1.43 | -1.35 | -1.69 | -1.94 | -1.69 | -0.81 | 0.34  | -0.49 | -1.18 | -0.57 |       |   |
| GENE1370X | 18356_at   | 18356_at   | 1     | 0.36  | -0.83 | -0.25 | 0.11  | 0.08  | -0.43 | -     |       |       |       |   |
|           | 0.47       | -0.73      | -0.26 | 0.95  | 0.94  | 0.4   | 0.46  | 0.18  | 0.65  | 1.11  | 0.18  | 0.18  | -1.25 | - |
|           | 0.97       | -0.25      | -0.68 | -1.18 | -1.12 | -0.53 | -0.83 | 0.04  | 0.08  | 0.61  | -0.26 | -0.41 |       |   |
| GENE1120X | 20615_at   | 20615_at   | 1     | -1    | 0.28  | -0.3  | -0.64 | -0.28 | -1.12 | -1    |       |       |       |   |
|           | -1         | 0.11       | 0.63  | 0.26  | 0.87  | 0.8   | 0.15  | 0.78  | 0.6   | 0.15  | -0.04 | -0.51 | -     |   |
|           | 0.05       | -0.91      | -0.49 | -1.39 | -1.28 | -0.49 | -0.57 | -0.12 | -0.26 | -0.3  | -0.2  | 0     |       |   |
| GENE1119X | 19809_at   | 19809_at   | 1     | -0.55 | 0.32  | -0.13 | -0.62 | -0.66 | -1.18 | -     |       |       |       |   |
|           | 0.53       | -0.73      | -0.07 | 0.72  | 0.33  | 0.79  | 0.61  | 0.09  | 0.37  | 0.45  | 0.57  | 0.01  | -0.55 | - |
|           | 0.47       | -0.18      | -0.64 | -1.39 | -1.25 | -1.08 | 0     | 0.22  | 0     | 0.08  | -0.47 | -0.07 |       |   |
| GENE1118X | 13785_at   | 13785_at   | 1     | -0.15 | 0.31  | -0.3  | -1.05 | -1.83 | -2    | -     |       |       |       |   |
|           | 1.39       | -1.78      | -0.39 | 1.44  | 0.08  | 1.08  | 0.64  | 1.22  | 1.18  | 0.75  | 0.53  | -0.07 | -0.53 | - |
|           | 0.28       | -0.53      | -1.28 | -1.73 | -1.73 | -1.73 | -1.32 | -0.08 | -0.28 | -0.16 | -0.37 | 0.12  |       |   |
| GENE1117X | 14832_at   | 14832_at   | 1     | -0.78 | -0.3  | -0.51 | -0.3  | -1.35 | -2.47 | -     |       |       |       |   |
|           | 2.55       | -3.18      | -0.12 | 0.45  | 0.44  | 0.6   | 0.67  | 0.11  | 0.34  | 0.42  | -0.47 | -0.05 | -0.3  | - |
|           | 0.76       | -0.28      | -2    | -2.64 | -2.39 | -1.94 | -1.35 | 0.08  | -0.28 | -0.05 | -0.91 | 0     |       |   |
| GENE1116X | 12761_s_at | 12761_s_at | 1     | -0.83 | -0.32 | -2    | -1.39 | -2.25 | -2.39 | -     |       |       |       |   |
|           | 2.55       | -2.39      | -0.23 | 0.73  | 0.25  | 1.12  | 0.72  | -0.15 | 0.36  | 0.97  | 0.07  | -0.55 | -1.08 | - |
|           | 0.34       | -0.25      | -1.88 | -4.05 | -4.32 | -3.83 | -0.51 | 0.23  | 0.21  | 0.2   | -0.13 | 0.26  |       |   |
| GENE1355X | 12457_at   | 12457_at   | 1     | -0.76 | -0.01 | -1.18 | -0.07 | -0.21 | -0.91 | -     |       |       |       |   |
|           | 0.13       | -0.88      | 1.63  | 2.45  | 2.17  | 2.01  | 2.18  | 2.23  | 2.06  | 1.13  | 0.09  | 1.46  | -0.23 | - |
|           | 0.86       | -1.32      | -1.05 | -2.47 | -2.12 | -0.91 | -0.76 | -0.66 | -0.49 | -0.34 | 0.05  | 0.17  |       |   |
| GENE1354X | 17024_s_at | 17024_s_at | 1     | -0.86 | -1.43 | -1.05 | -0.47 | -0.68 | -1    |       |       |       |       |   |
|           | 0.08       | 0.02       | 0.71  | 2.23  | 1.61  | 1.4   | 0.97  | 2.6   | 1.26  | 1.26  | 1.24  | 1.03  | -     |   |
|           | 0.68       | -1.47      | -1.69 | -1.35 | -2.12 | -1.51 | -0.43 | -0.62 | -0.53 | -0.53 | -0.37 | 0.01  | 0.26  |   |
| GENE1353X | 19442_at   | 19442_at   | 1     | 0.09  | 0.45  | -0.73 | -0.71 | -0.45 | -1.32 | -     |       |       |       |   |
|           | 0.73       | -0.23      | 0.81  | 1.29  | 0.85  | 1.49  | 1.47  | 1.34  | 1.18  | 1.09  | 0.53  | 0.65  | -0.78 | - |
|           | 1.18       | -1.08      | -0.73 | -0.86 | -0.86 | 0     | -0.91 | -0.94 | 0.17  | 0.33  | -0.39 | 0.21  |       |   |
| GENE1352X | 20495_s_at | 20495_s_at | 1     | -0.12 | 0.08  | -1.25 | -0.16 | -0.62 | -1.69 | -     |       |       |       |   |
|           | 0.3        | -0.32      | 0.65  | 1.29  | 1.18  | 0.38  | 1.18  | 1.55  | 1.13  | 0.61  | 0.18  | 0.59  | -1    | - |
|           | 0.78       | -0.78      | -0.81 | -0.34 | -0.49 | -0.12 | -0.59 | -1.25 | -0.15 | -0.01 | -0.49 | -0.04 |       |   |
| GENE1351X | 12916_at   | 12916_at   | 1     | 0.55  | -0.86 | -1.51 | 0.12  | -1.02 | -1.18 | -     |       |       |       |   |
|           | 0.73       | -0.08      | 0.52  | 1.07  | 1.13  | 1.18  | 0.97  | 1.63  | 1.05  | 1.53  | 1.35  | 1.02  | -0.53 | - |
|           | 1.15       | 0          | -2.12 | -0.97 | -1.83 | -1    | -0.81 | -0.13 | 0.11  | 0.5   | 0.09  | 0.5   |       |   |
| GENE1350X | 19135_at   | 19135_at   | 1     | 0.22  | 0.22  | -1.88 | -0.26 | -1.78 | -2.55 | -     |       |       |       |   |
|           | 1.43       | -0.13      | 0.37  | 1.37  | 1.6   | 1.99  | 1.77  | 1.85  | 1.05  | 1.52  | 1.18  | 0.8   | -1.28 | - |
|           | 0.91       | -0.12      | -3.32 | -1    | -1.32 | -0.62 | -1.05 | 0.15  | 0.15  | 0.65  | -0.35 | 0.78  |       |   |
| GENE1349X | 13568_at   | 13568_at   | 1     | -1.32 | -1.02 | -1    | -1.51 | -1.47 | -1.88 |       |       |       |       |   |
|           | 0.75       | 0.87       | 0.64  | 2.61  | 0.79  | 1.83  | 1.2   | 3.08  | 1.78  | 1.16  | 1.28  | 0.37  | -     |   |
|           | 2.25       | -0.76      | -0.62 | -1.78 | -1.21 | -1.08 | -0.64 | -1.02 | -0.39 | 0.41  | 0.47  | -0.57 | -0.49 |   |
| GENE1344X | 16688_at   | 16688_at   | 1     | -0.59 | -0.1  | -0.73 | -0.68 | -0.26 | -1.18 | -     |       |       |       |   |
|           | 0.26       | -0.18      | 0.46  | 0.47  | 0.61  | 0.46  | 0.5   | 0.6   | -0.2  | 0.73  | 1     | 0.02  | -1.08 | - |
|           | 0.73       | -0.53      | -0.68 | -0.64 | -0.55 | -0.51 | 0.29  | -0.3  | -0.12 | 0.01  | -0.13 | -0.08 |       |   |
| GENE1343X | 13543_at   | 13543_at   | 1     | -1.05 | -0.73 | -1.28 | -1.28 | -0.66 | -0.78 | -     |       |       |       |   |
|           | 0.71       | -0.91      | 1.17  | 0.87  | 1.06  | 1.52  | 1.35  | 0.61  | 0.6   | 1.47  | 0.91  | 0.53  | -0.91 | - |
|           | 1.21       | -1.05      | 0.05  | -1.78 | -1.28 | -0.81 | -1.02 | -0.02 | -0.12 | 0.43  | -0.26 | -0.37 |       |   |

|           |            |            |       |       |       |       |       |       |       |       |       |       |   |
|-----------|------------|------------|-------|-------|-------|-------|-------|-------|-------|-------|-------|-------|---|
| GENE1342X | 17601_at   | 17601_at   | 1     | -1.02 | -0.83 | -1.73 | -1.64 | -1.05 | -1.73 | -     |       |       |   |
| 1.25      | -0.51      | 0.65       | 1.17  | 1.13  | 1.19  | 1.07  | 0.46  | 0.58  | 1.16  | 1.42  | 0.76  | -1.32 | - |
| 0.57      | -1.05      | -1.12      | -1.25 | -0.73 | -0.76 | -0.43 | -0.2  | 0.05  | 0.61  | -0.15 | 0.04  |       |   |
| GENE1341X | 18507_s_at | 18507_s_at | 1     | -0.94 | -1.73 | -2.47 | -2.64 | -1.12 | -0.57 | -     |       |       |   |
| 1.39      | -0.51      | 0.88       | 1.32  | 1.45  | 1.25  | 1.33  | 0.68  | 1     | 1.48  | 1.71  | 0.71  | -2    | - |
| 0.97      | -1.35      | -0.81      | -2.18 | -1.43 | -0.59 | -0.49 | -0.66 | 0.23  | 0.12  | 0.17  | 0.22  |       |   |
| GENE1340X | 16569_s_at | 16569_s_at | 1     | -0.07 | -0.35 | -1.39 | -0.3  | -0.78 | -1.64 | -     |       |       |   |
| 1.43      | -1.25      | 0.15       | 0.45  | 0.35  | 0.61  | 0.52  | 0.34  | 0.45  | 0.69  | 0.15  | 0.5   | -0.37 | - |
| 1.05      | -0.21      | -1.35      | -0.91 | -1    | -0.91 | -0.57 | 0.01  | -0.2  | -0.12 | -0.37 | 0.11  |       |   |
| GENE1339X | 17187_at   | 17187_at   | 1     | -0.21 | -0.04 | -1.64 | -0.21 | -1.69 | -2.39 | -     |       |       |   |
| 2.47      | -1.83      | 0.84       | 1.35  | 1.56  | 2.13  | 2.02  | 1.14  | 1.03  | 1.92  | 1.22  | 1.21  | -0.49 | - |
| 0.78      | -0.3       | -2.25      | -1.25 | -1.35 | -0.66 | -0.83 | -0.12 | -0.1  | 0.25  | -0.88 | 0.01  |       |   |
| GENE1338X | 14393_at   | 14393_at   | 1     | -1.35 | -3.32 | -5.05 | -1.55 | -3.05 | -3.18 | -     |       |       |   |
| 4.32      | -2.47      | 1.28       | 2.55  | 2     | 1.79  | 1.84  | 1.02  | 1.71  | 2.01  | 2.21  | 1.31  | -1.18 | - |
| 0.39      | -0.76      | -2.32      | -1.15 | -1.64 | -0.47 | -0.12 | -0.62 | -0.39 | -0.08 | 0.25  | 0.44  |       |   |
| GENE1337X | 14491_at   | 14491_at   | 1     | -0.73 | -0.68 | -1.21 | -0.35 | -0.76 | -2.25 | -     |       |       |   |
| 0.86      | -0.55      | 0.35       | 0.54  | 0.43  | 0.4   | 0.52  | 0.82  | 0.53  | 0.56  | 0.5   | 0.37  | -0.68 | - |
| 0.86      | -0.3       | -1.51      | -1.12 | -1.47 | -0.86 | -0.16 | 0.01  | -0.01 | 0.17  | -0.55 | -0.28 |       |   |
| GENE1336X | 16459_s_at | 16459_s_at | 1     | -0.78 | -0.81 | -1.18 | -0.55 | -1.43 | -2.05 | -     |       |       |   |
| 0.53      | -0.32      | 0.29       | 0.64  | 1.17  | 0.46  | 0.73  | 0.73  | 0.34  | 0.9   | 0.43  | 0.78  | -1.15 | - |
| 1.21      | -0.66      | -1.59      | -1.43 | -1.64 | -1.18 | -0.94 | -0.13 | -0.25 | 0.26  | -0.73 | 0.01  |       |   |
| GENE1335X | 18886_at   | 18886_at   | 1     | -0.94 | -0.53 | -1.05 | -1.18 | -1.35 | -1.83 | -     |       |       |   |
| 0.68      | -1.05      | 0.16       | 0.65  | 0.75  | 0.61  | 0.58  | 0.13  | 0.16  | 0.8   | 0.71  | 0.16  | -0.64 | - |
| 0.1       | -0.71      | -0.81      | -1.12 | -1.88 | -0.53 | -0.57 | -0.32 | -0.05 | 0.11  | 0.07  | 0.22  |       |   |
| GENE1334X | 16126_s_at | 16126_s_at | 1     | -0.73 | -0.07 | -1.78 | -1.35 | -1.47 | -2.64 | -1    |       |       |   |
| 0.97      | -1.02      | -2.12      | -1.83 | -2.05 | -1.18 | -1.15 | -0.53 | -0.26 | -0.26 | -0.04 | 0.16  |       |   |
| GENE1333X | 16629_at   | 16629_at   | 1     | -1    | -1.21 | -2.73 | -2.32 | -2.32 | -2.64 | -     |       |       |   |
| 1.78      | -0.81      | 0.44       | -0.04 | 0.84  | 0.5   | 0.62  | 1.15  | -0.3  | 1.38  | 0.82  | 0.61  | -1.35 | - |
| 1.28      | -1.39      | -2.55      | -2.05 | -1.88 | -1.39 | -1.15 | -0.35 | 0.32  | 0.84  | -0.35 | 0.35  |       |   |
| GENE1332X | 12953_at   | 12953_at   | 1     | -1.94 | -2.39 | -3.32 | -3.47 | -4.05 | -4.64 | -     |       |       |   |
| 2.25      | -2.12      | 0.65       | 0.18  | 1.4   | 0.51  | 0.7   | 0.97  | -0.37 | 1.96  | 2.01  | 0.73  | -0.51 | - |
| 1.51      | -1.83      | -4.05      | -3.32 | -2.39 | -1.25 | -0.83 | -0.32 | -0.13 | 0.64  | -0.53 | 0.41  |       |   |
| GENE1158X | 13812_at   | 13812_at   | 1     | -1.59 | -1.15 | -1.64 | -1.55 | 0.32  | -1.02 | -     |       |       |   |
| 0.58      | -0.55      | 0          | 0.45  | 0.79  | 0.09  | 0.01  | 1.02  | -0.53 | 0.29  | 0.63  | 0.75  | -     |   |
| 1.47      | -1.05      | -1.25      | -0.73 | -1    | -0.66 | 0.11  | 0.89  | -0.21 | 0.05  | -0.34 | 0.13  | -0.05 | - |
| GENE1157X | 14723_f_at | 14723_f_at | 1     | -1.15 | -1.15 | -1.39 | -1.08 | -0.41 | -0.55 | -     |       |       |   |
| 0.2       | -0.01      | 1.22       | 0.68  | 0.54  | 0.61  | 0.65  | 1.05  | 0.13  | 0.31  | 0.79  | 0.21  | -     |   |
| 1.78      | -0.73      | -1.59      | 0.56  | -0.59 | -0.35 | -0.02 | 0.11  | -1.64 | 0     | -0.15 | -0.94 | -0.41 | - |
| GENE1156X | 12536_s_at | 12536_s_at | 1     | -2.05 | -1.43 | -2    | -2.83 | -0.16 | 1     | -     |       |       |   |
| 0.41      | 1.28       | 1.69       | 1.22  | 1.75  | 1.28  | 1.77  | 1.73  | 0.16  | 1.25  | 1.36  | 1.15  | -     |   |
| 0.39      | -0.91      | -2.25      | -3.05 | -1.83 | -0.91 | 0.33  | -0.53 | -1.05 | -1.21 | -1.08 | 0.76  | 0.77  | - |
| GENE1155X | 20525_at   | 20525_at   | 1     | -1.18 | -0.76 | -0.47 | -0.68 | -0.41 | -0.35 | -     |       |       |   |
| 0.76      | 0.37       | 0.77       | 0.41  | 1.04  | 0.28  | 0.48  | 1.48  | 0.28  | 0.74  | 0.83  | 0.74  | -     |   |
| 0.91      | -0.34      | -1.94      | -0.41 | -1.51 | -0.91 | -0.32 | -0.64 | -1.32 | -1.08 | -0.71 | 0.2   | 0.17  | - |
| GENE1229X | 18583_at   | 18583_at   | 1     | -2    | -1.12 | 0     | -0.86 | 0.54  | -1.39 | -     |       |       |   |
| 1.88      | -0.18      | 1.2        | 1.26  | -0.37 | 0.87  | 0.61  | 0.34  | 1.67  | 1.05  | 0.11  | 0.76  | -0.76 | - |
| 0.71      | -1.69      | 0.46       | -3.05 | -3.05 | -1.05 | 0.47  | 0.38  | 0.26  | -0.34 | -0.28 | -0.49 |       |   |
| GENE1228X | 13640_at   | 13640_at   | 1     | -1.83 | -1.47 | -0.59 | -0.66 | 0.28  | -0.73 | -     |       |       |   |
| 1.59      | -1.32      | 1.23       | 0.87  | 0.58  | 0.55  | 0.22  | 0.36  | 0.21  | -0.16 | -0.57 | 0.12  | -0.07 | - |
| 1.39      | -1.32      | 0.94       | -1.69 | -1.83 | -0.45 | 0.67  | -0.15 | -0.47 | -0.37 | -0.3  | -0.37 |       |   |
| GENE1148X | 14654_s_at | 14654_s_at | 1     | -0.81 | -0.86 | -0.57 | -0.25 | -0.53 | -1.39 | -     |       |       |   |
| 0.45      | -0.94      | -0.01      | 0.28  | 0.71  | 0.08  | 0.05  | -0.12 | 0.15  | 0.27  | 0.18  | -0.28 | -0.35 | - |
| 1.51      | -0.86      | -0.66      | -0.71 | -0.62 | -0.15 | -0.16 | -0.05 | -0.16 | 0     | 0.13  | -0.02 |       |   |
| GENE1147X | 17183_s_at | 17183_s_at | 1     | -0.86 | -0.3  | -0.01 | -0.35 | -0.71 | -1.39 | -     |       |       |   |
| 0.64      | -1.35      | -0.28      | 0.5   | 0.42  | 0.17  | 0.12  | -0.71 | 0.31  | 0.12  | 0.08  | -0.04 | -0.37 | - |
| 0.47      | -0.66      | -0.94      | -1    | -0.86 | -0.64 | 0.04  | 0.08  | -0.2  | 0.05  | -0.04 | 0.08  |       |   |

|           |            |            |       |       |       |       |       |       |       |       |       |       |    |
|-----------|------------|------------|-------|-------|-------|-------|-------|-------|-------|-------|-------|-------|----|
| GENE1146X | 15934_i_at | 15934_i_at | 1     | -0.81 | -1.43 | -0.28 | -0.97 | -1    | -1.47 | -     |       |       |    |
| 1.78      | -1.28      | -0.35      | 0.64  | 0.77  | 0.25  | 0.13  | -0.64 | 0.25  | 0.27  | 0.2   | -0.08 | -0.49 | -  |
| 0.71      | -0.64      | -0.81      | -1.32 | -0.68 | -1.43 | 0.54  | -0.18 | 0.44  | -0.12 | -0.25 | -0.25 |       |    |
| GENE1145X | 18608_at   | 18608_at   | 1     | -1.78 | -0.34 | -0.64 | -0.45 | -0.97 | -0.97 | -     |       |       |    |
| 0.91      | -0.73      | 0.05       | 0.56  | 0.79  | 0.72  | -0.15 | 0.02  | 0.28  | 0.01  | -0.05 | 0.22  | -0.32 | -  |
| 0.76      | -0.76      | -0.28      | -1.25 | -0.81 | -0.62 | 0.11  | -0.12 | -0.05 | -0.26 | -0.62 | -0.39 |       |    |
| GENE1144X | 16622_s_at | 16622_s_at | 1     | -1.59 | -1.08 | -0.86 | -1.25 | -0.81 | -0.62 | -     |       |       |    |
| 1.83      | -1.08      | -0.28      | 0.53  | 0.08  | 0.12  | -0.25 | -0.86 | 0.55  | -0.02 | -0.51 | 0     | -0.34 | -  |
| 1.51      | -1.12      | -0.39      | -1.12 | -1    | -0.34 | -0.18 | -0.3  | -0.13 | -0.28 | -0.05 | -0.3  |       |    |
| GENE726X  | 15418_at   | 15418_at   | 1     | -1.21 | -0.86 | -0.45 | -1.15 | -0.51 | -0.39 | -     |       |       |    |
| 1.15      | -0.51      | 0.09       | 0.65  | 0.67  | -0.35 | -0.18 | -0.2  | 0.43  | 0.11  | 0.16  | -0.05 | -0.08 | -  |
| 0.94      | -0.53      | -0.66      | -1.18 | -0.71 | -0.64 | 0.17  | -0.15 | 0.09  | 0.18  | 0.17  | 0     |       |    |
| GENE1204X | 14806_at   | 14806_at   | 1     | -0.21 | -0.2  | -0.15 | -0.88 | -0.45 | 0.16  | -     |       |       |    |
| 0.53      | -0.25      | 0.33       | -0.28 | 0.26  | -0.1  | 0.18  | 0.22  | -0.04 | 0.65  | 0.17  | 0.23  | -0.47 | -  |
| 0.2       | -0.62      | 0.09       | -1.12 | -0.68 | -0.62 | -0.73 | -0.39 | -0.32 | 0     | -0.51 | -0.23 |       |    |
| GENE1203X | 18826_at   | 18826_at   | 1     | -0.43 | -0.28 | -0.41 | -0.83 | -0.41 | -0.12 | -     |       |       |    |
| 0.86      | -0.55      | -0.08      | -0.16 | -0.2  | -0.51 | -0.12 | -0.1  | -0.07 | 0.04  | 0.56  | -0.26 | -0.57 | -  |
| 0.64      | -0.55      | -0.08      | -1.18 | -0.53 | -0.57 | -0.26 | -0.15 | 0.31  | -0.01 | -0.43 | -0.39 |       |    |
| GENE1202X | 15077_at   | 15077_at   | 1     | -0.94 | -0.26 | -0.68 | -0.71 | -0.16 | -0.32 | -     |       |       |    |
| 0.16      | -0.37      | 0.01       | -0.55 | -0.32 | -0.08 | 0.05  | -0.26 | -0.28 | 0.17  | 0.13  | -0.32 | -0.76 | -  |
| 0.35      | -0.78      | -0.02      | -1.15 | -1.18 | -0.91 | -0.68 | -0.43 | 0     | -0.13 | -0.41 | -0.21 |       |    |
| GENE1201X | 19258_at   | 19258_at   | 1     | -1.28 | -0.64 | -0.68 | -1.88 | -0.51 | -0.51 | -     |       |       |    |
| 0.02      | -0.49      | 0.52       | -0.23 | -0.01 | -0.02 | 0.26  | -0.02 | -0.59 | 0.27  | 0.25  | -0.55 | -0.94 | -  |
| 1.28      | -0.73      | 0.09       | -1.25 | -1.28 | -0.59 | -1.18 | -0.41 | -0.07 | 0.02  | -1    | -0.25 |       |    |
| GENE1200X | 12757_at   | 12757_at   | 1     | -1.64 | -0.55 | -1.39 | -2.12 | -0.91 | -0.55 | -     |       |       |    |
| 0.09      | -0.62      | 0.72       | -0.47 | -0.12 | 0.29  | 0.52  | -0.05 | -0.94 | 0.59  | 1.49  | -0.25 | -     |    |
| 1.64      | -0.91      | -1.43      | 0.09  | -1.83 | -1.78 | -0.97 | -1.12 | -1    | 0.69  | 0.88  | -1.21 | -0.2  |    |
| GENE1136X | 18706_s_at | 18706_s_at | 1     | -0.86 | -0.86 | -1.05 | -0.78 | -0.64 | -0.86 | -     |       |       |    |
| 0.71      | -0.59      | 0.26       | 0.67  | 0.51  | 0.73  | 0.26  | 0.01  | 0.49  | 0.37  | 0.15  | 0.15  | -0.76 | -  |
| 0.76      | -0.39      | -0.55      | -0.71 | -1.18 | -0.76 | -0.94 | -0.08 | -0.05 | -0.01 | -0.47 | -0.07 |       |    |
| GENE1135X | 15664_at   | 15664_at   | 1     | -0.86 | -0.62 | -1.15 | -1.12 | -0.68 | -1.08 | -     |       |       |    |
| 0.78      | -0.97      | 0.44       | 0.63  | 0.56  | 0.2   | 0.11  | -0.18 | 0.21  | 0.26  | 0.04  | 0     | -1.15 | -1 |
| -1.15     | -0.78      | -1.08      | -0.81 | -0.47 | -0.59 | -0.1  | 0.02  | 0.45  | 0.08  | 0.17  |       |       |    |
| GENE713X  | 13672_at   | 13672_at   | 1     | -1.12 | -0.45 | -2    | -1.35 | -1.15 | -0.49 | -     |       |       |    |
| 0.53      | -0.51      | -0.12      | 0.82  | 0.23  | 0.54  | 0     | -0.08 | 0.17  | 0.02  | -0.13 | 0.09  | -0.86 | -  |
| 1.18      | -1.15      | -0.37      | -1.69 | -1.35 | -0.55 | -0.04 | 0.27  | 0.22  | 0.54  | -0.21 | -0.25 |       |    |
| GENE679X  | 14121_at   | 14121_at   | 1     | -0.78 | -0.51 | -1.25 | -0.47 | -0.57 | -1.32 | -     |       |       |    |
| 0.64      | -0.76      | 0.12       | -0.59 | 0.34  | 0.34  | 0.48  | -0.08 | -0.66 | 0.49  | 0.27  | 0     | -0.73 | -  |
| 0.39      | -0.45      | -0.49      | -0.71 | -0.35 | -0.35 | -0.16 | -0.3  | -0.02 | -0.2  | -0.3  | 0     |       |    |
| GENE678X  | 14574_at   | 14574_at   | 1     | -1.39 | -1.94 | -2.83 | -2.05 | -1.32 | -1.83 | -     |       |       |    |
| 1.83      | -2         | 0.96       | 0.07  | 1.05  | 0.55  | 0.47  | 1.18  | -0.71 | 0.21  | 0.57  | 0.26  | -1.32 | -  |
| 1.18      | -1.73      | -0.73      | -0.88 | -0.83 | 0.11  | -0.02 | -1    | -0.28 | -0.15 | -0.28 | -0.39 |       |    |
| GENE677X  | 14610_at   | 14610_at   | 1     | -0.73 | -0.64 | -2.83 | -2.64 | -1.35 | -1.32 | -     |       |       |    |
| 1.21      | -0.94      | 0.71       | -0.26 | 0.22  | 1     | 0.94  | 0.84  | -0.49 | 1.3   | 1.18  | -0.13 | -1.83 | -  |
| 0.51      | -0.86      | -0.97      | -1.55 | -1.25 | -0.88 | -0.78 | -0.3  | 0.15  | 0.25  | -0.68 | 0.28  |       |    |
| GENE908X  | 20090_at   | 20090_at   | 1     | -2.05 | -1.12 | -1.18 | -2.83 | -2.32 | -1.28 | -     |       |       |    |
| 1.43      | -1.32      | -0.26      | 0.28  | 0.02  | -0.32 | -0.51 | -0.83 | -0.86 | -0.34 | 0.48  | -0.71 | -0.86 | -  |
| 0.45      | -0.91      | 0.45       | -2    | -1.73 | -0.76 | -0.04 | 0.37  | -0.15 | 0.26  | 0.04  | 0.25  |       |    |
| GENE708X  | 17033_at   | 17033_at   | 1     | -1.12 | -0.88 | -1    | -1.59 | -0.94 | -1    | -     |       |       |    |
| 0.91      | -0.88      | 0.5        | -0.07 | -0.18 | -0.15 | -0.37 | 0.17  | -0.3  | 0.25  | 0.26  | -0.23 | -0.57 | -  |
| 1.05      | -0.83      | 0.04       | -1.05 | -0.94 | -0.83 | 0.54  | -0.21 | 0.15  | 0.02  | -0.04 | -0.08 |       |    |
| GENE707X  | 19569_at   | 19569_at   | 1     | -1.25 | -0.51 | -1.32 | -0.91 | -0.51 | -0.59 | -     |       |       |    |
| 0.94      | -0.94      | 0.25       | -0.26 | 0.17  | 0.51  | 0.18  | -0.23 | -0.59 | 0.47  | 0.51  | 0.17  | -0.47 | -  |
| 0.43      | -0.57      | -0.13      | -1.02 | -1.08 | -0.53 | -0.08 | -0.08 | 0.04  | 0.02  | -0.28 | -0.02 |       |    |
| GENE706X  | 14105_at   | 14105_at   | 1     | -2.55 | -1.32 | -1.94 | -2    | -1.35 | -1    | -1    | -     |       |    |
| -1.88     | -0.12      | 0.17       | 0.07  | 0.38  | 0.17  | 0.21  | -0.94 | 0.16  | 0.32  | -0.23 | -1.05 | -     |    |
| 0.91      | -1         | -0.28      | -1.32 | -1.51 | -0.81 | 0.11  | 0     | 0.29  | 0     | -0.26 | 0.09  |       |    |



|           |            |            |       |       |       |       |       |       |       |       |       |       |       |   |
|-----------|------------|------------|-------|-------|-------|-------|-------|-------|-------|-------|-------|-------|-------|---|
| GENE705X  | 20674_s_at | 20674_s_at | 1     | -1.35 | -1.02 | -1.08 | -1.39 | -0.78 | -0.57 | -     |       |       |       |   |
|           | 0.23       | -0.57      | 0.47  | 0.57  | 0.56  | 0.13  | 0.32  | 0.45  | 0.01  | 0.23  | 0.45  | -0.08 | 0.02  | - |
|           | 0.64       | -0.88      | 0.25  | -1.05 | -0.73 | -0.37 | 0.15  | -0.08 | -0.08 | -0.23 | 0     | 0.04  |       |   |
| GENE704X  | 19209_s_at | 19209_s_at | 1     | -1.35 | -1.05 | -0.68 | -1.73 | -1.08 | -0.83 | -     |       |       |       |   |
|           | 0.71       | -1         | 0.31  | 0.47  | 0.53  | 0.31  | 0.22  | 0.12  | -0.12 | 0.36  | 0.4   | 0.15  | -0.59 | - |
|           | 0.51       | -1         | -0.78 | -1.32 | -1.05 | -0.57 | -0.39 | -0.08 | -0.25 | 0.01  | 0.08  | 0.16  |       |   |
| GENE703X  | 12284_at   | 12284_at   | 1     | -2    | -2.18 | -2.94 | -3.64 | -2.32 | -1.94 | -     |       |       |       |   |
|           | 2.05       | -2.18      | 0.38  | 0.64  | 1.33  | 1.15  | 1.16  | 0.35  | 0.4   | 1.18  | 1.15  | 0.6   | -1.64 | - |
|           | 0.94       | -2         | -0.81 | -1.69 | -1.39 | -0.71 | -1.12 | -0.39 | -0.37 | -0.28 | -0.39 | 0.02  |       |   |
| GENE1487X | 20518_at   | 20518_at   | 1     | 0.15  | 1.39  | 1.5   | 0.22  | 0.7   | 0.28  |       |       |       |       |   |
|           | 0.38       | 0.64       | -0.21 | 0.41  | -0.64 | -0.43 | 0.09  | 0.58  | 0.15  | -0.49 | 0.01  | -0.78 | -     |   |
|           | 1.12       | 0.05       | -0.97 | -0.21 | -1.15 | -0.18 | -0.13 | 0.18  | -0.37 | -0.37 | -0.15 | -0.05 | 0.01  |   |
| GENE1486X | 14779_at   | 14779_at   | 1     | 0.12  | 0.21  | 0.73  | 0.37  | 0.69  | -0.12 |       |       |       |       |   |
|           | 0.6        | 1.02       | -0.18 | -0.62 | -1.08 | -1.15 | -0.55 | -0.26 | 0.02  | -0.51 | -0.32 | -0.94 | -     |   |
|           | 0.68       | -0.37      | -0.66 | -0.02 | -0.57 | -0.64 | -0.37 | 0.62  | -0.78 | -0.49 | -0.66 | 0.37  | -0.41 |   |
| GENE1454X | 17349_g_at | 17349_g_at | 1     | 0.63  | 0.61  | 0.91  | -0.28 | 1.47  | -0.25 | 1     |       |       |       |   |
|           | 0.61       | 0.13       | -0.83 | -0.55 | -0.91 | -0.32 | -0.91 | -1.05 | 0.15  | 0.23  | -1.05 | -0.68 | -     |   |
|           | 0.15       | 0          | 0.33  | -0.76 | 0     | -1.15 | 0.44  | -0.23 | 0.67  | -0.07 | 0.81  | 0.05  |       |   |
| GENE1111X | 18750_f_at | 18750_f_at | 1     | 0.08  | -1.83 | -0.62 | -0.3  | 0.02  | 0.02  | -     |       |       |       |   |
|           | 0.78       | 0.76       | 0.32  | -0.43 | -1    | -1.02 | -0.59 | 0.73  | -0.04 | 0.44  | 1.14  | -0.83 | -0.59 |   |
|           | 0.22       | -0.41      | -0.34 | -2    | -0.12 | 1.22  | 0.33  | -0.55 | 0.12  | -0.66 | -0.13 | -0.86 |       |   |
| GENE1110X | 15107_s_at | 15107_s_at | 1     | 3.04  | -1.88 | 0.51  | -3.32 | -0.49 | 0.54  |       |       |       |       |   |
|           | 1.65       | 2.32       | -2.55 | -2.25 | -5.05 | -1.88 | 1.85  | 1.07  | -0.62 | 0.7   | 3.19  | -3.64 | -     |   |
|           | 0.21       | 0          | -0.81 | 0.67  | -2.55 | 0.72  | 0.84  | 1.73  | -2.83 | 1.6   | -2.83 | 1.67  | 0     |   |
| GENE1759X | 19457_at   | 19457_at   | 1     | -0.45 | 0.05  | 1.34  | -0.43 | -0.07 | -0.25 |       |       |       |       |   |
|           | 1.38       | 0.75       | -0.25 | 0.73  | -0.51 | -1.02 | -0.08 | 0.68  | 0.49  | -0.25 | -0.15 | 0.05  |       |   |
|           | 0.59       | 0.72       | -0.53 | -0.39 | 0.32  | -0.78 | -0.18 | 0.04  | 1.24  | 1.17  | 0.58  | -0.49 | 0.51  | - |
| GENE1390X | 18536_at   | 18536_at   | 1     | -1.18 | 0     | 0.54  | -0.55 | 1.1   | -0.55 |       |       |       |       |   |
|           | 0.77       | 0.16       | 0.28  | 0.73  | 0.29  | 0.13  | 0     | 0.51  | 0.13  | -0.16 | 0     | -0.32 | -     |   |
|           | 0.55       | -1.08      | -2    | 0.26  | -1.35 | -0.34 | 0.13  | 0.45  | -0.13 | -0.23 | -0.28 | 0.28  | 0.02  |   |
| GENE1389X | 20450_at   | 20450_at   | 1     | -1.12 | 0.2   | 0.13  | -0.62 | 0.85  | -0.59 |       |       |       |       |   |
|           | 1.9        | 0.53       | 0.81  | 0.29  | 0.68  | 0.32  | 0.27  | 1.17  | -0.18 | 0.28  | 0.32  | 0.16  | -     |   |
|           | 0.91       | -0.39      | -1.21 | -0.39 | -0.55 | -0.15 | 0.34  | 0.32  | 0.02  | -0.16 | -0.02 | 0.37  | 0.4   |   |
| GENE1388X | 13146_s_at | 13146_s_at | 1     | -1.08 | -0.68 | 0.6   | 0.51  | 0.27  | -0.43 |       |       |       |       |   |
|           | 0.26       | 0.41       | 0.22  | 1.01  | 0.45  | 0.32  | 0.09  | 0.87  | 0.43  | -0.39 | -0.05 | 0.16  | -     |   |
|           | 0.1        | -0.53      | -0.59 | -0.05 | -1.25 | -1.02 | -0.45 | 0.71  | -0.05 | -0.25 | 0.09  | 0.25  | 0     |   |
| GENE1387X | 18272_at   | 18272_at   | 1     | -0.47 | -0.16 | 0.21  | -0.34 | 0.09  | -0.13 |       |       |       |       |   |
|           | 0.84       | 0.52       | 0.23  | 0.75  | 0.18  | 0.49  | 0.09  | 1.11  | 0.34  | -0.13 | -0.15 | 0.09  | -     |   |
|           | 0.3        | -0.53      | -0.21 | 0.15  | -1.05 | -1.32 | -1.35 | -0.02 | 0.7   | 0.05  | 0.09  | -0.2  | -0.07 |   |
| GENE1386X | 19656_s_at | 19656_s_at | 1     | -1.55 | -0.15 | -0.62 | -0.21 | 0.04  | -0.62 |       |       |       |       |   |
|           | 0.57       | 0.36       | 0.64  | 0.22  | 0.52  | -0.02 | -0.25 | 1.16  | -0.41 | -0.34 | -0.88 | 0.29  | -     |   |
|           | 0.04       | -0.53      | -0.64 | 0     | -1.32 | -1.21 | -0.16 | -0.1  | 0.36  | -0.1  | 0.34  | 0.27  | 0.29  |   |
| GENE1410X | 17322_at   | 17322_at   | 1     | -0.91 | -0.18 | -0.66 | -1    | -0.13 | 0.35  | -     |       |       |       |   |
|           | 0.13       | 0.26       | 1.05  | -0.01 | 0.55  | -0.16 | 0.26  | 1.01  | -0.51 | 0.4   | 0.04  | 0.25  | -0.43 | - |
|           | 0.51       | -0.05      | 0.33  | -0.73 | -0.37 | -0.45 | 0.22  | 1.13  | 0.67  | 0.7   | 0.43  | 0.47  |       |   |
| GENE1222X | 15516_s_at | 15516_s_at | 1     | -1.05 | -0.49 | -0.47 | -1.02 | -0.04 | 0.34  | -     |       |       |       |   |
|           | 0.23       | -0.34      | -0.04 | 0.59  | -0.1  | 0.12  | -0.18 | 0.15  | -0.13 | -0.53 | -0.88 | -0.25 | 0.13  | - |
|           | 0.43       | 0.04       | -0.13 | -0.88 | -1.21 | -0.83 | 0.28  | 1.07  | 0.28  | 0.31  | 0.47  | 0.13  |       |   |
| GENE1221X | 18760_at   | 18760_at   | 1     | -0.97 | -0.47 | -0.39 | -1.28 | -0.43 | -0.25 | -     |       |       |       |   |
|           | 0.43       | -0.49      | 0     | 0.56  | -0.12 | 0.07  | 0.07  | 0     | 0     | -0.3  | -0.3  | -0.23 | -0.18 | - |
|           | 0.01       | -0.26      | 0.01  | -1.12 | -0.86 | -0.59 | 0.78  | 0.68  | 0.23  | 0.17  | 0.44  | 0.23  |       |   |
| GENE727X  | 15059_at   | 15059_at   | 1     | -1.69 | -1.15 | -0.37 | -1.69 | -0.26 | 0.09  | -     |       |       |       |   |
|           | 1.02       | -0.91      | 0.62  | 0.58  | 0.05  | -0.51 | -0.47 | -0.3  | -0.1  | -0.32 | -0.47 | -0.23 | -0.05 | - |
|           | 0.68       | -0.59      | -0.15 | -0.66 | -0.57 | -0.83 | 0.27  | 0.67  | -0.08 | -0.02 | 0.49  | -0.08 |       |   |

|           |            |            |       |       |       |       |       |       |       |       |       |       |       |
|-----------|------------|------------|-------|-------|-------|-------|-------|-------|-------|-------|-------|-------|-------|
| GENE1483X | 14735_s_at | 14735_s_at | 1     | -0.39 | 0.22  | 0.58  | 0.76  | 0.32  | 0.33  |       |       |       |       |
|           | 0.04       | 0.4        | 0.25  | -0.07 | 0.09  | 0.25  | 0.07  | 0.32  | 0.04  | -0.01 | 0     | -0.04 | -     |
|           | 0.25       | -1         | -0.59 | 0.17  | -0.91 | -1.05 | -0.62 | -0.53 | 0.16  | 0.08  | 0.13  | -0.37 | -0.23 |
| GENE1227X | 18091_at   | 18091_at   | 1     | -0.66 | 0.36  | -0.3  | 0.21  | 0.27  | -0.49 | -     |       |       |       |
|           | 0.2        | -0.73      | 0.81  | 0.17  | 0.59  | 0.28  | -0.15 | 0.59  | -0.45 | -0.2  | 0.01  | 0.35  | -0.73 |
|           | 0.73       | -0.57      | -0.28 | -1.59 | -1    | -0.51 | -0.68 | 0.09  | -0.16 | 0.04  | -0.45 | 0.05  | -     |
| GENE1226X | 17209_s_at | 17209_s_at | 1     | -0.53 | 0.37  | 0.28  | 0     | 0.22  | 0.07  | -     |       |       |       |
|           | 0.64       | -0.45      | 0.28  | 0.26  | 0.33  | 0.53  | 0.09  | -0.18 | 0.42  | 0.02  | 0.12  | 0.22  | -0.04 |
|           | 0.21       | -0.51      | 0.11  | -1.15 | -0.94 | -0.59 | 0.07  | 0.34  | -0.2  | 0.43  | -0.25 | 0.15  | -     |
| GENE1369X | 12447_at   | 12447_at   | 1     | 0.48  | -0.04 | 0.38  | 0.16  | 0.04  | -0.76 | -     |       |       |       |
|           | 0.43       | -0.76      | 0.2   | 0.86  | 0.26  | 0.09  | 0.11  | -0.01 | 0.16  | 0.64  | 0.63  | 0.11  | -0.39 |
|           | 1.28       | -1.47      | -0.83 | -1.47 | -0.81 | -0.3  | -0.45 | -0.73 | -0.64 | -0.83 | -0.49 | -0.35 | -     |
| GENE1152X | 12945_at   | 12945_at   | 1     | -0.86 | 0     | 0     | -1.28 | -1.51 | -0.81 | 0     |       |       |       |
|           | 0          | -0.81      | 0     | -0.59 | 0     | 0     | 0     | 0     | 0.73  | 1.35  | -1    | -1    | -     |
|           | 0.81       | -3.18      | -0.64 | -2.55 | -1.35 | -0.64 | -0.83 | -1.64 | -1.39 | -1.15 | -0.23 | 0.07  | -     |
| GENE1079X | 16675_g_at | 16675_g_at | 1     | -0.23 | -0.64 | -0.04 | 0.45  | -0.26 | -1    | -     |       |       |       |
|           | 0.86       | -0.76      | -0.55 | -0.3  | 0.25  | 0.02  | 0.15  | -0.37 | 0.01  | 0.21  | -0.16 | -0.32 | 0.2   |
|           | 0.01       | -0.68      | -0.57 | -1.32 | -0.91 | -1.39 | -1.64 | -1.12 | -0.86 | -0.83 | -0.25 | -0.1  | -     |
| GENE1394X | 20271_at   | 20271_at   | 1     | -0.59 | 0.87  | 1.39  | 0.75  | 0.72  | -0.23 | -     |       |       |       |
|           | 2.2        | 1.85       | -0.55 | -0.91 | -0.53 | -0.83 | -0.76 | 0.38  | 0.25  | -1.15 | -0.53 | -0.37 | -     |
|           | 1.18       | -1.83      | -1    | -0.68 | -2.55 | -2.05 | -0.86 | -0.68 | -0.47 | 0     | 0     | -0.73 | -0.91 |
| GENE1393X | 16306_at   | 16306_at   | 1     | -0.07 | 0.93  | 0.67  | -0.81 | -0.62 | -0.88 | -     |       |       |       |
|           | 1.22       | 1          | -0.28 | -0.15 | -0.3  | -0.16 | -0.08 | 0.49  | -0.47 | 0.16  | 0.28  | -0.71 | -     |
|           | 1.12       | -0.97      | -1    | -0.83 | -1.94 | -2.05 | -1.28 | -0.64 | -0.01 | 0     | -0.07 | -0.45 | -0.1  |
| GENE1392X | 18512_at   | 18512_at   | 1     | 0.37  | 0.08  | 0.13  | -0.1  | 0.04  | 0.27  | -     |       |       |       |
|           | 0.36       | 0.5        | -0.2  | -0.15 | 0.09  | -0.16 | -0.04 | -0.05 | 0.41  | 0.27  | -0.01 | 0.23  | -     |
|           | 0.62       | -0.1       | -0.13 | -0.66 | -1.25 | -1.59 | -1.05 | -1.05 | 0.18  | 0.11  | 0     | -0.28 | 0.09  |
| GENE1391X | 15196_s_at | 15196_s_at | 1     | 0.31  | -0.02 | 0.69  | 0.53  | -1    | -0.76 | -     |       |       |       |
|           | 0.65       | 0.81       | -1.25 | -0.3  | -0.34 | -0.12 | -0.71 | -0.05 | -0.62 | -0.02 | -0.1  | -0.15 | -     |
|           | 0.1        | -0.55      | -0.47 | -2    | -1.59 | -1.73 | -1.39 | -1.18 | 0.22  | -0.15 | -0.15 | -0.25 | 0.16  |
| GENE1216X | 18692_at   | 18692_at   | 1     | -0.41 | 0.12  | 0.08  | -0.28 | -0.45 | -0.02 | -     |       |       |       |
|           | 0.22       | 1.17       | -0.16 | -0.21 | -0.23 | -0.51 | -0.35 | -0.07 | -0.37 | -0.41 | -0.37 | -0.28 | -     |
|           | 0.02       | -0.51      | -0.28 | -0.13 | -0.57 | -0.64 | -0.49 | -0.37 | 0.28  | 0.05  | 0.01  | 0.15  | -0.02 |
| GENE1214X | 15453_at   | 15453_at   | 1     | -0.94 | -0.37 | -0.05 | -0.64 | -1.15 | -0.2  | -     |       |       |       |
|           | 1.2        | 0.63       | -0.45 | -0.91 | -0.41 | -0.59 | -0.49 | 0.35  | -0.34 | -0.68 | -0.39 | -0.3  | -     |
|           | 0.11       | -0.04      | -0.37 | -0.1  | -1.05 | -0.88 | -0.13 | -0.88 | 0.48  | 0.01  | 0.02  | -0.45 | -     |
|           | 0.18       |            |       |       |       |       |       |       |       |       |       |       |       |
| GENE1212X | 12857_at   | 12857_at   | 1     | -0.91 | -1.15 | -0.2  | -0.05 | 0.05  | 0.21  | -     |       |       |       |
|           | 0.07       | 0.48       | -0.28 | 0.42  | 0.21  | -0.02 | -0.47 | 0.43  | 0.22  | -0.39 | -1    | 0.11  | -0.25 |
|           | 1.59       | -1.28      | 0.02  | -1.39 | -0.91 | -0.83 | -0.25 | -0.25 | -0.62 | -0.16 | -0.73 | -0.41 | -     |
| GENE1211X | 16162_s_at | 16162_s_at | 1     | -1.21 | -0.97 | 0.2   | -0.81 | -0.28 | 0.22  | -     |       |       |       |
|           | 0.26       | 0.26       | -0.04 | 0.13  | -0.02 | -0.55 | -0.64 | -0.12 | -0.21 | -0.16 | -0.25 | -0.02 | -0.15 |
|           | 1.02       | -1.35      | -0.05 | -1.35 | -1.05 | -0.49 | 0.52  | -0.1  | -0.16 | -0.28 | -0.35 | -0.34 | -     |
| GENE1215X | 12226_at   | 12226_at   | 1     | -0.66 | -0.66 | -0.37 | -0.64 | -0.73 | 0.12  | -     |       |       |       |
|           | 1.07       | 1.05       | 0.08  | -0.3  | 0.2   | -0.08 | 0     | 0.79  | -0.23 | -0.37 | -0.45 | 0.07  | -     |
|           | 0.11       | -0.68      | -0.94 | 0.11  | -1.73 | -1.43 | -0.78 | -0.59 | -0.01 | -0.25 | 0.04  | -0.12 | -     |
|           | 0.29       |            |       |       |       |       |       |       |       |       |       |       |       |
| GENE1205X | 14624_at   | 14624_at   | 1     | -0.35 | -0.39 | -0.71 | -0.43 | -0.39 | -0.23 | -     |       |       |       |
|           | 0.12       | 0.6        | 0.12  | -0.37 | -0.21 | -0.26 | -0.28 | 0.55  | -0.68 | 0.02  | 0.37  | -0.41 | -     |
|           | 0.62       | -0.73      | -1.21 | -0.51 | -1.32 | -0.91 | -0.47 | -0.47 | -0.04 | -0.28 | -0.18 | 0.04  | -0.2  |
| GENE1218X | 17320_g_at | 17320_g_at | 1     | -0.83 | -0.16 | 0.08  | -0.16 | 0.13  | -0.49 | -     |       |       |       |
|           | 0.13       | -0.15      | 0.35  | -0.59 | -0.04 | -1.21 | -0.73 | -0.35 | -0.59 | -1.02 | -0.3  | -0.55 | -0.64 |
|           | 0.71       | -0.51      | 0.47  | -1.59 | -1.18 | -0.64 | 0.16  | -0.16 | 0.21  | 0.17  | -0.41 | -0.12 | -     |
| GENE1217X | 17423_s_at | 17423_s_at | 1     | -1.83 | -0.25 | -0.23 | -0.43 | 0.09  | -0.81 | -     |       |       |       |
|           | 0.23       | -0.88      | 0.29  | -0.64 | -0.49 | -0.32 | -0.21 | -0.04 | -1.18 | -0.47 | -0.25 | -0.18 | -     |
|           | 0.94       | -0.47      | -0.83 | 0.02  | -2.05 | -2.25 | -1.28 | -0.53 | -0.1  | 0.22  | 0.13  | -0.37 | 0.07  |

|           |            |            |       |       |       |       |       |       |       |       |       |       |       |
|-----------|------------|------------|-------|-------|-------|-------|-------|-------|-------|-------|-------|-------|-------|
| GENE1219X | 15636_at   | 15636_at   | 1     | -1.08 | -0.25 | -0.66 | -1.05 | 0.2   | 0.11  |       |       |       |       |
|           | 0.59       | -0.04      | 0.79  | -0.71 | -0.51 | -0.64 | -0.39 | 0.22  | -1.02 | -0.55 | -0.51 | -0.57 | -     |
|           | 0.91       | -0.41      | -0.81 | 0.58  | -1.25 | -0.97 | -0.81 | -1.05 | -0.39 | -0.26 | 0.07  | -0.15 | 0.17  |
| GENE1199X | 15175_s_at | 15175_s_at | 1     | -0.39 | 0     | -0.34 | -1    | 0.04  | -0.16 |       |       |       |       |
|           | 0.08       | -0.59      | 0.32  | -1.25 | -0.59 | -0.71 | -0.53 | -0.59 | -1.12 | -0.25 | -0.28 | -0.57 | -     |
|           | 1.43       | -1.21      | -1.05 | -0.12 | -1.05 | -0.88 | -0.43 | -0.08 | -0.37 | -0.18 | -0.43 | -0.16 | 0.02  |
| GENE1459X | 15098_s_at | 15098_s_at | 1     | -1.55 | -0.26 | 0.97  | 0.51  | 1.2   | -0.12 |       |       |       |       |
|           | 2.04       | 0.41       | 0.91  | -1.21 | -1.32 | -0.43 | -0.32 | -0.1  | -0.35 | -2.12 | -1    | -0.71 | -     |
|           | 2.94       | -2.55      | -2.25 | 1.49  | -1.73 | -1.18 | -0.35 | -1.32 | -3.05 | -1.64 | -1.88 | -2.94 | -1.88 |
| GENE1458X | 15142_at   | 15142_at   | 1     | -0.55 | -0.45 | 0.48  | 0.54  | 0.27  | -1.35 |       |       |       |       |
|           | 0.61       | -0.2       | 0.07  | -0.97 | -0.37 | -0.25 | -0.62 | -0.66 | -0.76 | -0.71 | -0.41 | -0.37 | -     |
|           | 0.41       | -0.97      | -0.37 | 0.16  | -0.45 | -0.21 | -0.2  | 0.01  | -0.51 | -0.07 | -0.16 | -0.66 | -0.68 |
| GENE1457X | 14539_s_at | 14539_s_at | 1     | -0.45 | 0     | -0.2  | -0.13 | 0     | -1.18 |       |       |       |       |
|           | 0.32       | -0.59      | -0.23 | -1.15 | -0.47 | -0.53 | -0.39 | -0.59 | -0.73 | -0.2  | -0.49 | -0.26 | -     |
|           | 0.43       | -1.47      | -1.08 | 0.55  | -0.55 | -0.66 | -0.78 | -0.81 | -1.05 | -0.41 | -0.35 | -0.39 | -0.18 |
| GENE1038X | 17319_at   | 17319_at   | 1     | -0.83 | 0.15  | 0     | 0.15  | -0.08 | -1.21 |       |       |       |       |
|           | 0.27       | -0.39      | -0.12 | -0.3  | -0.21 | -0.25 | -0.49 | -0.2  | -0.73 | -0.73 | -0.21 | -0.73 | -     |
|           | 0.73       | -0.39      | -0.57 | -0.02 | -0.64 | -0.51 | -0.08 | -0.02 | 0.17  | 0     | 0.23  | -0.21 | -0.1  |
| GENE1014X | 14069_at   | 14069_at   | 1     | -1.73 | 0.26  | 0.25  | -0.2  | -0.07 | -1.64 |       |       |       |       |
|           | 0.22       | -0.49      | -0.21 | -0.2  | -0.32 | 0.13  | -0.13 | -0.15 | 0.09  | -0.37 | -0.49 | -0.32 | -     |
|           | 0.88       | -0.57      | -0.76 | -0.2  | -0.91 | -1    | -0.86 | -1.12 | -0.68 | -0.47 | -0.07 | -0.59 | -0.3  |
| GENE1017X | 17103_s_at | 17103_s_at | 1     | -0.64 | -0.68 | -0.15 | 0.07  | 0.2   | -0.37 | -     |       |       |       |
|           | 0.39       | -0.32      | -1.08 | -0.59 | -0.73 | -0.43 | -0.34 | -1    | -0.37 | -1.28 | -1.55 | -0.76 | -1.02 |
|           | -0.73      | -1.02      | -1.02 | -1.05 | -0.59 | -0.55 | -0.16 | -0.08 | -0.05 | -1.43 | -1.21 |       | -2    |
| GENE1016X | 17552_s_at | 17552_s_at | 1     | -0.41 | -0.13 | 0.49  | -0.12 | -0.71 | -1.47 |       |       |       |       |
|           | 0.78       | 0.78       | -1.55 | -0.34 | -0.68 | -0.16 | -0.41 | 0.32  | -0.66 | -0.73 | -0.55 | -0.66 | -     |
|           | 1.15       | -1.78      | -0.86 | -0.49 | -0.83 | -1.02 | -1.02 | -0.37 | -0.81 | 0.17  | 0.15  | -0.91 | -1.15 |
| GENE1015X | 17010_s_at | 17010_s_at | 1     | -1.69 | -0.32 | 0.02  | -0.45 | -2    | -1.64 |       |       |       |       |
|           | 0.02       | 0.38       | -2.18 | 0.34  | -1.25 | -0.2  | -1.28 | 0.21  | -1    | -2.83 | -2.32 | -1.25 | -     |
|           | 1.25       | -3.05      | -1.55 | -0.53 | -2.18 | -2.83 | -2.83 | -0.53 | -1.21 | 0.11  | 0.47  | -3.18 | -2.39 |
| GENE1224X | 18192_s_at | 18192_s_at | 1     | -0.25 | 0.02  | 0.43  | -0.68 | 0.33  | 0.65  | -     |       |       |       |
|           | 0.62       | -1         | 0.07  | -0.04 | -0.37 | 0.32  | 0.02  | -0.68 | -0.04 | 0.59  | -0.34 | -0.15 | 0.09  |
|           | 0.34       | -0.28      | 0.7   | -1    | -1.69 | -0.83 | -0.45 | 0     | -0.12 | 0.22  | 0.8   | 0.59  |       |
| GENE1223X | 16239_at   | 16239_at   | 1     | -0.73 | -0.32 | 0.8   | -0.13 | -0.2  | -0.1  |       |       |       |       |
|           | 0.16       | -0.25      | 0.12  | 0.6   | 0.17  | 0.08  | -0.02 | -0.13 | 0.53  | -0.21 | -0.32 | -0.02 |       |
|           | 0.23       | 0.18       | -0.02 | -0.07 | -0.66 | -1.02 | -0.51 | -0.05 | 0.35  | 0.08  | 0.23  | 0.73  |       |
|           | 0.34       |            |       |       |       |       |       |       |       |       |       |       |       |
| GENE1213X | 13533_at   | 13533_at   | 1     | -0.32 | -1    | 0.45  | -0.51 | 0.37  | 0.15  | 0     |       |       |       |
|           | -0.66      | 0.45       | 0.18  | -0.28 | -0.81 | -0.81 | -0.66 | 0.59  | -0.18 | -0.41 | -0.39 | -0.12 | -     |
|           | 0.81       | -0.73      | 0.15  | -0.91 | -1.25 | -0.64 | 0.56  | -0.13 | -0.13 | -0.13 | 0.08  | -0.07 |       |
| GENE1103X | 19147_at   | 19147_at   | 1     | -0.71 | 0.08  | 0.98  | 0.69  | 0.12  | 0.08  | -     |       |       |       |
|           | 0.81       | -0.86      | -0.66 | 0.21  | -0.08 | -0.37 | -0.45 | -1.39 | 0.29  | -0.76 | -1.69 | -0.1  | 0.36  |
|           | 0.2        | -0.43      | -0.25 | -1.08 | -0.78 | -0.66 | 0.08  | 0.15  | -0.07 | 0.04  | 0.2   | 0.04  |       |
| GENE1074X | 20710_at   | 20710_at   | 1     | -0.97 | -0.37 | -0.05 | -0.62 | -0.53 | 0     | -     |       |       |       |
|           | 1.18       | -1.05      | -0.05 | 0.5   | -0.37 | -0.18 | -0.25 | -0.55 | 0.43  | -0.18 | -0.21 | -0.18 | -0.07 |
|           | 0.15       | -0.45      | -0.15 | -0.81 | -0.76 | -0.26 | 0.29  | 0.08  | -0.18 | -0.25 | 0.22  | 0     |       |
| GENE1073X | 16380_at   | 16380_at   | 1     | -0.83 | -0.25 | 0.49  | -0.68 | -0.34 | -0.64 | -     |       |       |       |
|           | 0.76       | -0.68      | -0.49 | 0.49  | -0.21 | -0.3  | -0.35 | -0.47 | 0.55  | -0.08 | -0.34 | -0.35 | -0.57 |
|           | 0.62       | -0.73      | -0.39 | -1.21 | -1.28 | -0.55 | -0.32 | 0.23  | -0.1  | -0.15 | 0.05  | 0.05  |       |
| GENE1072X | 17053_at   | 17053_at   | 1     | -0.97 | -0.62 | -0.07 | -0.66 | -0.81 | -1.02 | -     |       |       |       |
|           | 0.53       | -1.15      | -0.51 | 0.42  | -0.28 | -0.32 | -0.21 | -0.81 | 0.12  | -0.25 | -0.64 | -0.28 | -0.39 |
|           | 0.53       | -0.62      | -0.39 | -0.91 | -1.12 | -0.55 | -0.12 | 0.11  | -0.2  | -0.05 | -0.21 | -0.39 |       |
| GENE1071X | 19995_at   | 19995_at   | 1     | -1.64 | -0.45 | -0.47 | -0.45 | -0.51 | -0.37 | -     |       |       |       |
|           | 0.73       | -0.78      | 0     | 0.43  | 0.22  | 0.09  | -0.23 | -0.53 | 0.22  | -0.13 | -0.1  | -0.3  | -0.47 |
|           | 0.26       | -0.35      | -0.43 | -1.05 | -0.97 | -0.76 | 0.02  | 0.23  | -0.18 | 0.18  | 0.02  | 0.07  |       |

|           |            |            |       |       |       |       |       |       |       |       |       |       |   |
|-----------|------------|------------|-------|-------|-------|-------|-------|-------|-------|-------|-------|-------|---|
| GENE1070X | 17643_at   | 17643_at   | 1     | -1.73 | -0.76 | -0.53 | -1.43 | -0.64 | -0.83 | -     |       |       |   |
| 1.28      | -1.32      | 0.11       | 0.05  | 0.16  | 0.23  | 0.05  | -0.76 | -0.57 | -0.13 | -0.35 | 0.09  | -0.26 | - |
| 0.68      | -0.45      | -0.07      | -1.73 | -1.73 | -1.39 | 0.01  | 0.37  | 0.2   | 0.05  | -0.07 | -0.15 |       |   |
| GENE1069X | 20457_at   | 20457_at   | 1     | -1.12 | -0.51 | -0.86 | -0.55 | -0.47 | -0.32 | -     |       |       |   |
| 0.59      | -1.05      | -0.18      | 0.15  | 0     | 0.01  | -0.13 | -0.34 | -0.05 | -0.18 | -0.62 | -0.1  | -0.23 | - |
| 0.09      | -0.39      | -0.47      | -1    | -1.25 | -0.81 | 0.16  | -0.59 | -0.39 | 0     | -0.02 | 0.08  |       |   |
| GENE1068X | 12983_at   | 12983_at   | 1     | -1.88 | -0.12 | -0.57 | -1.21 | -0.71 | -0.88 | -     |       |       |   |
| 0.32      | -1.05      | -0.3       | 0.11  | -0.04 | 0.16  | 0.08  | -0.13 | 0     | -0.05 | -0.53 | -0.53 | -0.43 | - |
| 0.25      | -0.49      | -0.43      | -1.15 | -1.51 | -0.78 | 0     | -0.35 | -0.39 | -0.07 | -0.21 | -0.02 |       |   |
| GENE1067X | 15843_at   | 15843_at   | 1     | -1.21 | -0.71 | -0.51 | -0.76 | -0.66 | -1.25 | -     |       |       |   |
| 0.68      | -1.28      | -0.41      | -0.18 | 0.27  | 0.08  | -0.1  | -0.28 | -0.12 | -0.04 | -0.1  | 0.13  | 0.21  | - |
| 0.04      | -0.51      | -0.1       | -1.21 | -1.15 | -0.62 | 0.34  | 0.16  | -0.04 | -0.13 | 0.41  | 0.46  |       |   |
| GENE1066X | 13108_at   | 13108_at   | 1     | -1.28 | -0.66 | -0.76 | -0.97 | -1.18 | -1.25 | -     |       |       |   |
| 0.73      | -1.08      | -0.55      | 0.01  | -0.28 | -0.05 | -0.18 | -0.55 | -0.37 | -0.34 | -0.18 | -0.57 | -0.21 | - |
| 0.51      | -0.16      | -0.94      | -1.32 | -1.28 | -1.18 | 0.12  | 0.4   | 0.37  | 0     | 0     | -0.07 |       |   |
| GENE1065X | 19200_s_at | 19200_s_at | 1     | -1.12 | -0.76 | -1    | -1.32 | -1.28 | -1    | -     |       |       |   |
| 1.02      | -1.25      | -0.53      | 0.09  | -0.04 | 0     | -0.13 | -0.71 | -0.49 | -0.41 | -0.3  | -0.64 | -0.07 | - |
| 0.08      | -0.28      | -0.71      | -1.05 | -0.86 | -0.47 | -0.49 | 0.01  | -0.05 | -0.23 | -0.01 | 0.09  |       |   |
| GENE1064X | 17995_s_at | 17995_s_at | 1     | -1.05 | -0.81 | -0.47 | -0.91 | -1.32 | -1.21 | -     |       |       |   |
| 0.66      | -1.12      | -0.57      | 0.35  | 0.31  | -0.04 | -0.15 | -0.59 | -0.25 | -0.32 | -0.53 | -0.34 | 0.29  | - |
| 0.1       | -0.28      | -0.73      | -1.05 | -0.94 | -0.64 | -0.57 | 0.08  | 0.04  | 0.09  | -0.28 | 0     |       |   |
| GENE1063X | 15681_s_at | 15681_s_at | 1     | -1.15 | -0.47 | 0.13  | -0.07 | -0.76 | -0.86 | -     |       |       |   |
| 0.55      | -1.15      | -0.35      | 0     | 0.34  | -0.62 | -0.66 | -0.73 | -0.45 | -0.59 | -0.57 | 0.17  | 0.38  | - |
| 0.64      | -0.41      | -0.35      | -1.15 | -1.15 | -0.64 | 0.17  | 0.82  | 0.09  | 0.45  | 0.33  | -0.02 |       |   |
| GENE1062X | 13548_at   | 13548_at   | 1     | -1.15 | -0.59 | 0.49  | 0.36  | -0.91 | -1.39 | -     |       |       |   |
| 1.05      | -1.39      | -0.34      | 0.95  | 0.38  | 0.11  | -0.55 | -0.51 | 0.52  | -0.3  | -0.73 | 0.2   | -0.43 | - |
| 0.76      | -0.3       | -1.05      | -0.94 | -1.47 | -1.12 | -0.51 | 0.52  | -0.12 | 0.53  | -0.41 | 0.12  |       |   |
| GENE1077X | 15186_s_at | 15186_s_at | 1     | -0.18 | -1.05 | 0.43  | 1.22  | -0.76 | -1.35 | -     |       |       |   |
| 0.57      | -1.02      | -1.05      | -0.68 | -0.51 | -0.88 | -1.59 | -0.88 | -1.39 | -0.57 | -0.1  | -0.78 | 0.45  | - |
| 0.64      | -2         | -1.18      | -2.18 | -1.69 | -0.81 | -0.13 | -0.15 | -0.47 | -0.62 | 0.09  | 0.41  |       |   |
| GENE1076X | 18696_s_at | 18696_s_at | 1     | 0.16  | -1.15 | 0.18  | 1.05  | -1.18 | -1.25 | -     |       |       |   |
| 0.78      | -1.59      | -1.18      | -0.47 | -0.53 | -1    | -1.47 | -1.51 | -1.73 | -0.59 | 0.04  | -0.64 | 0.12  | - |
| 0.25      | -1.83      | -1.43      | -2.32 | -2    | -1.18 | -0.41 | -0.51 | -0.62 | -0.59 | 0.08  | 0.52  |       |   |
| GENE1075X | 13344_s_at | 13344_s_at | 1     | -0.73 | -0.02 | -0.28 | -0.04 | -0.68 | -0.83 | -     |       |       |   |
| 0.71      | -0.64      | -0.37      | 0.05  | 0.11  | 0     | -0.39 | -0.53 | -0.21 | -0.3  | -0.04 | -1.69 | -0.07 | - |
| 0.78      | -0.57      | -0.28      | -1.05 | -0.88 | -0.57 | -0.18 | 0.17  | -0.13 | 0.15  | 0.54  | 0.42  |       |   |
| GENE1182X | 16196_at   | 16196_at   | 1     | -0.62 | 0     | -0.21 | -0.64 | -0.91 | -1.28 | -     |       |       |   |
| 1.12      | -1.51      | -0.57      | -0.3  | -0.04 | -0.2  | -0.83 | -0.97 | -0.66 | 0.08  | -0.47 | 0.09  | -0.71 | - |
| 1.47      | -0.55      | -0.88      | -1.35 | -1.43 | -0.81 | -0.59 | 0.38  | -0.08 | 0.18  | 0.15  | -0.05 |       |   |
| GENE1181X | 16592_s_at | 16592_s_at | 1     | -1.25 | -0.94 | -0.12 | -0.97 | -0.94 | -1.43 | -     |       |       |   |
| 0.55      | -1.32      | -0.34      | -0.45 | -0.47 | -0.49 | -0.53 | -0.68 | -0.49 | -0.13 | -0.32 | -0.59 | -0.86 | - |
| 1.59      | -0.97      | -0.71      | -1.43 | -1.25 | -0.78 | -0.97 | -0.3  | -0.16 | -0.15 | -0.25 | 0     |       |   |
| GENE1180X | 15849_at   | 15849_at   | 1     | -1.55 | -1.18 | -0.97 | -2.12 | -1.94 | -1.78 | -     |       |       |   |
| 1.55      | -1.59      | -0.81      | -0.57 | -0.86 | -0.88 | -0.94 | -1.59 | -0.57 | -0.53 | -0.57 | -0.59 | -1.43 | - |
| 1.69      | -1.59      | -1.73      | -2.94 | -1.78 | -1.47 | -1.28 | -0.35 | -0.2  | 0     | -0.32 | -0.26 |       |   |
| GENE435X  | 12887_s_at | 12887_s_at | 1     | -1.69 | -0.43 | -0.51 | -0.12 | -1.05 | -0.78 | -     |       |       |   |
| 1.39      | -1.83      | -0.78      | -0.3  | -0.51 | -0.28 | -1.12 | -1.43 | -0.64 | -0.39 | -0.81 | -0.41 | -0.51 | - |
| 1.08      | -0.39      | -0.55      | -0.64 | -1    | -0.43 | -0.35 | 0.17  | -0.39 | -0.04 | -0.37 | 0.02  |       |   |
| GENE426X  | 20376_at   | 20376_at   | 1     | -1.43 | -0.59 | -1.69 | -0.68 | -1.51 | -1.73 | -     |       |       |   |
| 1.21      | -1.94      | -0.78      | 0     | -0.91 | -0.91 | -2    | -1.08 | -0.21 | -0.15 | -0.62 | -0.78 | -0.3  | - |
| 0.73      | -1.18      | -0.18      | -1.35 | -1.55 | -0.35 | 0.08  | 0.04  | -0.12 | 0.18  | 0.83  | -0.05 |       |   |
| GENE1421X | 20585_at   | 20585_at   | 1     | 0.05  | -2.94 | -1.55 | -1.12 | 1.27  | 1.41  | -     |       |       |   |
| 4.05      | -1.55      | 2.45       | 0.86  | 0.46  | 0.56  | 0.51  | 0.69  | 0.34  | 1.07  | 0.64  | 0.28  | -0.18 | - |
| 0.28      | -0.21      | 2.14       | -0.59 | -0.57 | -1.02 | 0.73  | 0     | 0.23  | -0.04 | 0.23  | -0.05 |       |   |
| GENE1420X | 17204_at   | 17204_at   | 1     | 0.31  | -0.05 | -0.05 | -0.1  | 0.22  | 0.57  | -     |       |       |   |
| 1.28      | -0.02      | 0.65       | -0.1  | -0.13 | 0.08  | 0.07  | 0     | -0.21 | 0.17  | 0.49  | -0.32 | -0.13 | - |
| 0.17      | -0.02      | 0.55       | -0.25 | -0.32 | -0.34 | -0.21 | -0.1  | 0.17  | 0.01  | 0     | 0.01  |       |   |

|           |            |            |       |       |       |       |       |       |       |       |       |       |   |
|-----------|------------|------------|-------|-------|-------|-------|-------|-------|-------|-------|-------|-------|---|
| GENE1419X | 18665_r_at | 18665_r_at | 1     | -0.23 | -0.68 | -1.32 | -1.73 | 0.51  | 0.97  | -     |       |       |   |
| 1.69      | -0.66      | 1.36       | -0.78 | -0.43 | 0.43  | 0.4   | -0.04 | -0.12 | 0.93  | 0.33  | -0.1  | -1.25 | - |
| 0.04      | -0.59      | 1.23       | -0.04 | 0.15  | 0.31  | -0.83 | -0.97 | -0.32 | -0.49 | -0.34 | -0.21 |       |   |
| GENE1418X | 18187_at   | 18187_at   | 1     | 0.16  | 0.27  | -0.71 | -0.35 | 0.36  | 0.11  | -     |       |       |   |
| 0.83      | -1.21      | 0.27       | -0.28 | 0.02  | 0.38  | 0.09  | -0.49 | -0.07 | 0.52  | 0.5   | -0.35 | -0.47 | - |
| 0.15      | -0.41      | 0.62       | -0.04 | 0.15  | 0.28  | -0.28 | -0.25 | -0.05 | -0.05 | -0.25 | -0.1  |       |   |
| GENE1507X | 12359_s_at | 12359_s_at | 1     | 0.16  | 0     | 0.2   | 0.63  | 1.05  | 1     | -     |       |       |   |
| 1.05      | -0.81      | 0.72       | -0.2  | 0.49  | 0.15  | 0.28  | -0.71 | 0.5   | 0.27  | -0.53 | 0.63  | 0.08  |   |
| 0.27      | -0.12      | 0.79       | -0.08 | -0.21 | -0.05 | 0.08  | -1.51 | -0.23 | -0.32 | -0.04 | 0.17  |       |   |
| GENE1230X | 18411_at   | 18411_at   | 1     | -1.43 | 0.25  | -0.28 | 0.48  | 0.93  | 1.12  | -     |       |       |   |
| 0.73      | -0.51      | 0.58       | 0.04  | 0.65  | 0.84  | 0.7   | 0.05  | 0.16  | 0.27  | -0.02 | 0.63  | -0.16 | - |
| 0.47      | -0.45      | 0.87       | -0.04 | -0.51 | -0.2  | -0.12 | 0     | 0.04  | 0.05  | -0.04 | 0.08  |       |   |
| GENE1417X | 20569_s_at | 20569_s_at | 1     | -0.68 | -0.13 | -0.28 | -1.15 | 0.89  | 0.69  |       |       |       |   |
| 0.2       | -0.2       | 1.16       | 0.01  | -0.43 | -0.02 | 0.08  | -0.2  | -0.62 | 0.01  | 0.26  | -0.43 | -     |   |
| 1.35      | -0.91      | -0.71      | 1.11  | -1.21 | -0.71 | -0.35 | 0.04  | -0.57 | 0.01  | -0.49 | -0.12 | -0.23 |   |
| GENE1416X | 13063_at   | 13063_at   | 1     | 0.23  | 0.18  | -0.88 | -1.78 | 0.56  | 1.48  | -     |       |       |   |
| 0.41      | 0.01       | 1.16       | -1.25 | -0.3  | -0.12 | 0.52  | -0.49 | -1.08 | 0.23  | 0.32  | -0.21 | -1    | - |
| 0.43      | -0.76      | 1.18       | -0.88 | -0.53 | -0.83 | -0.16 | -0.55 | 0.27  | -0.2  | -0.23 | -0.37 |       |   |
| GENE1415X | 13003_at   | 13003_at   | 1     | -0.68 | -0.3  | -0.64 | -0.16 | -0.1  | 0.58  | -     |       |       |   |
| 0.73      | -0.35      | 0.87       | -0.07 | -0.08 | 0.56  | 0.16  | 0.38  | -0.41 | -0.15 | 0.11  | -0.23 | -0.28 | - |
| 0.47      | 0          | 0.58       | -1.12 | -0.94 | -0.34 | 0.34  | -0.97 | -0.39 | -0.32 | -0.47 | 0.11  |       |   |
| GENE1225X | 18013_r_at | 18013_r_at | 1     | -0.34 | 0.32  | -0.62 | -0.3  | -0.15 | 0.29  | -     |       |       |   |
| 0.3       | -0.55      | 0.07       | -0.23 | 0.08  | 0.18  | -0.2  | -0.53 | -0.13 | 0.15  | -0.12 | 0     | 0.17  | - |
| 0.91      | -0.39      | 0.81       | -1.08 | -0.83 | -0.32 | -0.41 | -0.23 | 0.28  | -0.02 | -0.51 | -0.08 |       |   |
| GENE1091X | 18958_s_at | 18958_s_at | 1     | -0.04 | 0.09  | -0.05 | -0.25 | -0.02 | 0     | -     |       |       |   |
| 0.57      | -0.62      | 0.13       | -0.71 | -0.15 | -0.21 | -0.08 | -1.15 | -0.2  | 0.34  | 0.23  | -0.25 | -0.02 | - |
| 0.51      | -0.37      | 0.36       | -0.53 | -0.62 | -0.57 | -0.28 | -0.21 | -0.25 | -0.2  | -0.12 | -0.05 |       |   |
| GENE1220X | 14982_at   | 14982_at   | 1     | -0.97 | -0.39 | -0.78 | -0.08 | 0.33  | 0.35  | -     |       |       |   |
| 0.32      | -0.43      | -0.57      | -0.35 | -0.68 | 0.29  | -0.39 | -0.28 | -0.55 | -0.45 | -1.05 | -0.08 | -     |   |
| 0.18      | 0.57       | -0.18      | 0.05  | -1.21 | -1.32 | -0.97 | -0.37 | 0.35  | -0.62 | 0.13  | -0.35 | -0.32 |   |
| GENE1093X | 18008_r_at | 18008_r_at | 1     | -1.64 | -0.53 | -1.18 | -1.88 | 0.68  | 0.2   | -     |       |       |   |
| 1.35      | -1.78      | 1.22       | -1.02 | -0.39 | 0.25  | -0.28 | -1.28 | -0.1  | 0.01  | -1.08 | -0.26 | -0.47 | - |
| 1.15      | -0.64      | 0.01       | -0.66 | -1.28 | -0.94 | 0.66  | -0.91 | -0.97 | -0.94 | 0.01  | -0.1  |       |   |
| GENE1092X | 13081_s_at | 13081_s_at | 1     | -0.43 | -0.39 | -0.49 | -0.49 | 0.31  | -0.35 | -     |       |       |   |
| 0.66      | -1.05      | -0.08      | -0.76 | -0.37 | -0.01 | -0.25 | -0.91 | -0.81 | 0.12  | -0.49 | -0.32 | 0.38  | - |
| 0.04      | -0.28      | 0.05       | -0.35 | -0.41 | -0.28 | 0.63  | -0.13 | -0.26 | -0.57 | 0.21  | -0.45 |       |   |
| GENE1287X | 18235_at   | 18235_at   | 1     | -2.39 | -2.94 | 0.52  | 0.69  | 1.09  | 0.54  | -     |       |       |   |
| 0.97      | -4.05      | 1.12       | -3.18 | 0.37  | -4.05 | -2.73 | -2.47 | -2.18 | -1.15 | -0.51 | 1.22  | 2.65  | - |
| 0.64      | -0.34      | 3.31       | -0.01 | -0.16 | -0.02 | 1.63  | -0.45 | -0.35 | -0.3  | -0.16 | -0.49 |       |   |
| GENE1286X | 19897_s_at | 19897_s_at | 1     | -0.86 | -0.15 | 0.09  | -0.25 | 0.16  | -0.23 | -     |       |       |   |
| 0.32      | -1.25      | 0.46       | -0.51 | 0.16  | -0.49 | -0.08 | -0.66 | -0.37 | 0.11  | 0.37  | 0.31  | 0.51  | - |
| 0.12      | -0.12      | 0.44       | -0.26 | -0.39 | 0.12  | 0.57  | 0.18  | -0.08 | -0.13 | 0.11  | 0.15  |       |   |
| GENE1283X | 12118_at   | 12118_at   | 1     | 0.12  | 0.05  | 0.05  | -0.2  | 0.23  | -1.02 | -     |       |       |   |
| 1.59      | -3.05      | -0.45      | -0.88 | -1.02 | -1.15 | -0.78 | -2.39 | -1.08 | -0.73 | -0.78 | -0.78 | 0.01  |   |
| 0.34      | 0.08       | 0.11       | 0.61  | 0.96  | 0.46  | 0.83  | 0.5   | -0.13 | -0.53 | 0.2   | 0.08  |       |   |
| GENE1282X | 16504_at   | 16504_at   | 1     | -0.62 | -0.53 | -0.2  | -0.39 | 0.17  | -0.47 | -     |       |       |   |
| 0.45      | -1.35      | -0.15      | -0.59 | -0.45 | -0.81 | -0.86 | -1.25 | -0.94 | -0.32 | -0.26 | -0.28 | 0.4   |   |
| 0.23      | 0.08       | -0.16      | 0.17  | 0.21  | -0.02 | 0.45  | 0.68  | 0.05  | 0.02  | 0.57  | 0.23  |       |   |
| GENE1281X | 13156_f_at | 13156_f_at | 1     | -1    | -0.66 | -0.71 | -0.64 | 0.21  | 0.25  | -     |       |       |   |
| 2.12      | -2.25      | -0.2       | -0.59 | -1.05 | -0.71 | -0.71 | -2.32 | -0.66 | -0.76 | -1    | -0.83 | 0.07  | - |
| 0.45      | -0.68      | 0.92       | 0.45  | -0.47 | 0.65  | -0.37 | -0.08 | -0.47 | -0.47 | 0.17  | 0.08  |       |   |
| GENE1280X | 12153_at   | 12153_at   | 1     | 0.01  | -0.02 | -0.15 | -0.1  | 0.04  | 0.17  | -     |       |       |   |
| 0.81      | -1.15      | -0.26      | -0.32 | -0.15 | -0.45 | -0.1  | -1.08 | -0.41 | -0.26 | -0.45 | -0.18 | 0.48  |   |
| 0.37      | 0.13       | 0.54       | 0     | 0.04  | 0.18  | 0.47  | 0.04  | 0.02  | 0.02  | 0.26  | 0.09  |       |   |
| GENE1279X | 19458_at   | 19458_at   | 1     | -1.25 | -0.3  | 0.17  | -1.05 | 0.6   | 0.02  | -     |       |       |   |
| 0.25      | -0.83      | 0.73       | -0.81 | -0.12 | -0.47 | -0.25 | -1.08 | -0.73 | -0.12 | 0.21  | -0.59 | -1    | - |
| 0.34      | -0.94      | 0.44       | 0.22  | 0.33  | 0.6   | 0.18  | -0.37 | -0.1  | -0.2  | -0.04 | 0.07  |       |   |

|           |            |            |       |       |       |       |       |       |       |       |       |       |
|-----------|------------|------------|-------|-------|-------|-------|-------|-------|-------|-------|-------|-------|
| GENE1278X | 18328_at   | 18328_at   | 1     | -1.59 | -0.73 | 0.13  | -1    | 0.26  | -0.81 | -     |       |       |
| 0.81      | -2.64      | 0.55       | -1.47 | -0.68 | -1.35 | -0.49 | -1.64 | -1.18 | -1.25 | -0.86 | -0.53 | 0.82  |
|           | 0.16       | -0.39      | 1.76  | 0.85  | 0.97  | 1.32  | 1.07  | -0.01 | -0.08 | -0.13 | 0.01  | -0.07 |
| GENE1277X | 20089_at   | 20089_at   | 1     | -1.55 | -0.66 | -0.41 | -1.39 | -0.37 | -0.71 | -     |       |       |
| 0.86      | -1.35      | 0.49       | -0.66 | -0.1  | -1.39 | -0.62 | -0.78 | -1.21 | -0.57 | 0.22  | -0.3  | 0.8   |
| 0.34      | -0.86      | 2.01       | 0.62  | 0.87  | 1.21  | 2.53  | 0.37  | 0.42  | -0.1  | 0.64  | 0.02  |       |
| GENE1276X | 16488_at   | 16488_at   | 1     | -1.08 | -0.97 | 0     | -1.28 | -0.64 | -1.43 | -     |       |       |
| 0.51      | -1.43      | -0.07      | -0.26 | -0.28 | -0.39 | -0.34 | -0.68 | -0.45 | -0.83 | -0.71 | -0.51 | -0.02 |
| 0.26      | -0.47      | 0.67       | 0.87  | 1.03  | 1.13  | 1.38  | -0.37 | 0.01  | 0.01  | -0.15 | -0.64 |       |
| GENE1275X | 13103_at   | 13103_at   | 1     | -1.64 | -0.73 | -0.41 | -1.08 | -0.57 | -2.18 | -     |       |       |
| 0.39      | -0.91      | 1.02       | -0.86 | -0.1  | -0.62 | -0.32 | -0.47 | -1.51 | -0.49 | 0.72  | -0.94 | 0.28  |
| 0.05      | -0.49      | 1.43       | -0.15 | 0.29  | 0.62  | 1.17  | 0.52  | 0.7   | 0.48  | 0.17  | 0.04  |       |
| GENE1293X | 13782_at   | 13782_at   | 1     | 0.09  | -0.47 | -0.73 | -0.55 | -0.83 | -0.16 | -     |       |       |
| 1.05      | -1.15      | 0.31       | -1.35 | 0.11  | -0.13 | 0.02  | -0.02 | -0.47 | 0.55  | 0.85  | 0.61  | 0.87  |
|           | 1.13       | 0.97       | 0.79  | 0.63  | 0.5   | -0.26 | -0.26 | -0.35 | -0.05 | 0     | -0.15 | -0.15 |
| GENE1285X | 16654_at   | 16654_at   | 1     | -0.41 | -0.97 | -1.15 | -0.68 | -0.04 | 0.11  | -     |       |       |
| 1.35      | -1.69      | 0.84       | -0.47 | -0.25 | -0.49 | -0.1  | -0.39 | -0.51 | 0.02  | 0.91  | 0.04  | 0.79  |
|           | 0.73       | 0.26       | 1.67  | 0.22  | 0.4   | 0.27  | 0.64  | 0.31  | 0.4   | 0.73  | 0.46  | 0.75  |
| GENE1284X | 17815_at   | 17815_at   | 1     | -0.86 | -1.51 | -2.18 | -1.08 | -0.12 | 0.79  | -     |       |       |
| 2.55      | -1.59      | 0.95       | -2.05 | 0.37  | -1.21 | -0.76 | -1.28 | -1.69 | 0.04  | 0.52  | -0.59 | 1.27  |
| 0.1       | -0.34      | 1.34       | -0.1  | 0.33  | 0.4   | 0.15  | -0.76 | -0.23 | -0.39 | 0.25  | 0.05  |       |
| GENE1274X | 12344_at   | 12344_at   | 1     | -1.21 | -0.73 | -1.08 | -0.43 | 0.02  | -0.2  | -     |       |       |
| 0.86      | -1.35      | 0.52       | -0.15 | 0.41  | 0.05  | 0.16  | -0.26 | 0.05  | -0.25 | 0.13  | 0.36  | 0.44  |
| 0.18      | -0.28      | 0.79       | -0.26 | 0.18  | 0.49  | 0.94  | 0.47  | 0.2   | 0.08  | 0.05  | -0.1  |       |
| GENE1273X | 15608_at   | 15608_at   | 1     | -1.55 | -1.47 | -0.73 | -0.49 | -0.57 | -0.64 | -     |       |       |
| 0.83      | -1.08      | 0.09       | -0.13 | 0.43  | -0.35 | -0.45 | -0.59 | -0.45 | -0.25 | 0     | 0.34  | 0.2   |
| 0.28      | -0.02      | 0.46       | -0.08 | 0.18  | 0.41  | 0.78  | 0.76  | 0.71  | 0.82  | 0.07  | -0.13 |       |
| GENE1272X | 13513_at   | 13513_at   | 1     | -1.47 | -1.05 | -0.94 | -1.32 | -0.51 | -0.25 | -     |       |       |
| 0.83      | -1.39      | 0.28       | 0     | -0.07 | 0     | -0.32 | -0.71 | -0.08 | -0.39 | -0.35 | -0.39 | 0.46  |
|           | 0.04       | 0          | 0.28  | -0.94 | -0.88 | -0.71 | 0.79  | 0.91  | 0.27  | 0.12  | 0.36  | 0.17  |
| GENE1271X | 14418_at   | 14418_at   | 1     | -2.73 | -2    | -2.55 | -2.25 | -1.12 | -0.83 | -     |       |       |
| 1.64      | -2.32      | -0.15      | -0.12 | -0.21 | -0.57 | -1    | -1.25 | -0.59 | -1.08 | -1.02 | -0.35 | 0.65  |
| 0.25      | -0.49      | 0.66       | -1.83 | -1.47 | -0.26 | 0.74  | 0.04  | -0.21 | 0.11  | -0.15 | -0.26 |       |
| GENE919X  | 16131_s_at | 16131_s_at | 1     | -1.25 | -1.15 | -1.73 | -1.55 | -0.88 | -0.47 | -     |       |       |
| 1.25      | -0.78      | 0.08       | 0.11  | 0.01  | -0.2  | -0.21 | -0.51 | -1.12 | 0.22  | 0     | -0.08 | 0.34  |
|           | 0.17       | -0.53      | 0.58  | -0.81 | -0.78 | -0.57 | 0     | 0.36  | 0.41  | 0.15  | 0.09  | -0.18 |
| GENE1266X | 12482_s_at | 12482_s_at | 1     | -0.91 | -0.43 | -0.53 | -0.91 | -0.78 | -0.81 | -     |       |       |
| 0.73      | -1.32      | -0.08      | 0.09  | 0.61  | -0.39 | -0.39 | -0.47 | -1.39 | -0.2  | 0.02  | -0.12 | 0.46  |
|           | 0.04       | -0.18      | -0.13 | -0.32 | -0.28 | 0.48  | 0.53  | 1     | 0.15  | 1.15  | -0.18 | 0.18  |
| GENE993X  | 12549_s_at | 12549_s_at | 1     | -1.32 | -0.25 | -0.15 | -0.55 | -0.39 | -0.51 | -     |       |       |
| 0.64      | -1.35      | 0.42       | -0.2  | 0.13  | -0.15 | -0.02 | -0.26 | -0.34 | 0.28  | 0.01  | -0.07 | -0.07 |
|           | 0.12       | -0.04      | -0.1  | -0.16 | -0.07 | 0.04  | 0.2   | 0.47  | 0.07  | 0.17  | -0.07 | 0.02  |
| GENE1289X | 20292_at   | 20292_at   | 1     | -0.41 | -1.94 | -1.59 | -1.51 | -0.94 | -1.25 | -     |       |       |
| 1.28      | -1.32      | -0.81      | -0.32 | 0.18  | -1.08 | -1.15 | -0.86 | -0.21 | -0.83 | -1.47 | 0.18  | 1.4   |
|           | 0.94       | 0.54       | -0.26 | 0     | -0.3  | 0.28  | -0.2  | 0.09  | 0     | 0.54  | 0.27  | 0.65  |
| GENE1288X | 20429_at   | 20429_at   | 1     | -0.88 | -2    | -3.47 | -3.18 | -1.64 | -1.21 | -     |       |       |
| 1.83      | -1.69      | -0.39      | 0.21  | 0.58  | -1.12 | -1.08 | -0.64 | -2.83 | -0.76 | -0.71 | 0.42  | 2.43  |
|           | 0.99       | 0.74       | -0.13 | 0.25  | 0.43  | 1.04  | 0.05  | 0.99  | 1.33  | 1.59  | 1.2   | 1     |
| GENE1264X | 17040_s_at | 17040_s_at | 1     | -1.35 | -0.83 | -1.73 | -0.53 | -1.02 | -0.47 | -     |       |       |
| 0.66      | -0.81      | -0.43      | -1    | -0.05 | -0.02 | -0.86 | -0.02 | -1.25 | -1.15 | -0.81 | 0     | 0.5   |
|           | 0.82       | -0.66      | 0.54  | -0.51 | -0.2  | 0.53  | 0.46  | 0.94  | 0.57  | 1.12  | 1.2   | 1.1   |
| GENE1263X | 18913_s_at | 18913_s_at | 1     | -1.78 | -0.83 | -2.55 | -1.08 | -1.18 | -0.05 | -     |       |       |
| 0.94      | -0.88      | 0          | -0.91 | 0.29  | -0.73 | -0.83 | 0.08  | -1    | -0.83 | -0.39 | -0.18 | 0.65  |
|           | 0.48       | -0.68      | 0.67  | -0.88 | -0.21 | 0.57  | 0.61  | 0.69  | 0.5   | 0.79  | 1.28  | 1     |
| GENE949X  | 17292_at   | 17292_at   | 1     | -0.08 | -0.51 | -2.55 | -0.86 | -0.86 | -0.18 | -     |       |       |
| 1.47      | -0.86      | 0.04       | -1.12 | -0.53 | -0.45 | -0.49 | 0.13  | -0.57 | -0.49 | -0.45 | 0.59  | 1.1   |
|           | 0.15       | 0.55       | 0.35  | -0.76 | -0.83 | -0.73 | -0.49 | 0.33  | -0.35 | -0.05 | -0.49 | -0.05 |

|           |            |            |       |       |       |       |       |       |       |       |       |       |       |
|-----------|------------|------------|-------|-------|-------|-------|-------|-------|-------|-------|-------|-------|-------|
| GENE948X  | 15385_at   | 15385_at   | 1     | -0.97 | -1.51 | -1.69 | -1.78 | -1.64 | -0.41 | -     |       |       |       |
| 2.39      | -1.51      | -0.37      | -2.05 | -0.51 | -1.88 | -1.08 | -1.21 | -1.02 | -0.3  | 0.25  | 0.32  | 0.72  |       |
|           | 0.94       | -0.2       | -0.23 | -0.91 | -0.05 | -0.1  | -0.15 | 0.38  | -0.05 | 0     | 0.26  | 0.22  |       |
| GENE947X  | 17917_s_at | 17917_s_at | 1     | -1    | -1.43 | -2.83 | -1.51 | -1.83 | -0.97 | -     |       |       |       |
| 1.55      | -1.21      | -0.76      | -1.35 | 0.11  | -0.88 | -0.78 | -0.88 | -1.69 | -0.66 | -0.3  | 1.02  | 1.97  |       |
|           | 0.62       | 0.54       | -0.41 | -0.55 | -0.07 | -0.08 | -0.59 | -0.71 | -0.57 | -0.3  | -0.18 | 0.12  |       |
| GENE1414X | 17451_at   | 17451_at   | 1     | -1.12 | -0.47 | -1.47 | -1.59 | 0.64  | 0.35  | -     |       |       |       |
| 0.08      | -0.59      | -0.91      | 1.08  | -0.64 | -0.12 | 0.18  | 0.48  | -0.35 | -0.28 | -0.32 | -0.02 | -0.12 |       |
| GENE1413X | 18289_at   | 18289_at   | 1     | -2.55 | -1.59 | -2    | -2.47 | 0.63  | 0.15  | 0     |       |       |       |
| 0         | 1.28       | -1.15      | 0.28  | -1.59 | -0.91 | 1.26  | -2    | -0.25 | 0.02  | 0.32  | 0.09  | -     |       |
| 0.04      | -1.59      | 0.73       | -2.12 | -0.49 | -0.23 | -0.21 | -0.08 | -0.47 | -0.23 | 0.74  | 0.34  | -     |       |
| GENE1412X | 14603_at   | 14603_at   | 1     | -1.15 | -2.18 | -2.94 | -3.64 | 0.43  | 1.35  | -     |       |       |       |
| 0.28      | 0.02       | 1.32       | -2.18 | -0.08 | -2.18 | -0.13 | 0.36  | -2.94 | -0.39 | 0.13  | 0.5   | -     |       |
|           | 1.36       | -0.51      | -0.53 | 2.12  | 0.84  | 1.12  | 1.41  | 1.02  | 0.58  | 0.84  | 0.58  | 0.28  |       |
|           | 0.15       | -          | -     | -     | -     | -     | -     | -     | -     | -     | -     | -     |       |
| GENE1411X | 12299_at   | 12299_at   | 1     | -1.35 | -1.32 | -2.18 | -2.39 | -0.66 | 0.04  | -     |       |       |       |
| 0.07      | -0.81      | 0.44       | -1.18 | -0.35 | -0.91 | -0.34 | 0.07  | -2.12 | -0.53 | 0.27  | -0.08 | 0.47  |       |
|           | 0.25       | -0.34      | 1.13  | 0.33  | 0.72  | 1     | 0.59  | 0.29  | 0.33  | 0.28  | 0.28  | 0.07  |       |
| GENE1115X | 18135_at   | 18135_at   | 1     | -0.08 | -0.57 | -0.88 | -1.32 | 0.25  | 0.32  | -     |       |       |       |
| 1.02      | -0.53      | 0.21       | -0.07 | -0.13 | -0.83 | 0.07  | -0.57 | -0.81 | 0.17  | 0.74  | -0.04 | -0.71 |       |
|           | 0.39       | -0.53      | 0.25  | 0.26  | 0.52  | 0.36  | -0.15 | -0.07 | 0.12  | 0.02  | -0.32 | -0.32 |       |
| GENE1114X | 12739_s_at | 12739_s_at | 1     | 0.29  | -1.21 | -1.18 | -1.21 | -0.26 | -0.02 | -     |       |       |       |
| 1.25      | -0.43      | -0.07      | -0.13 | -0.37 | -0.45 | 0.09  | 0.43  | -0.13 | 0.09  | 0.6   | -0.26 | -0.21 |       |
|           | 0.13       | -0.13      | 0.01  | 0.62  | 1.27  | 0.87  | 0.61  | 0.11  | 0.2   | -0.23 | 0.45  | 0.09  |       |
| GENE935X  | 16065_at   | 16065_at   | 1     | -0.83 | -1.08 | -1.94 | -2.47 | 0     | 0.22  | -2    |       |       |       |
| -1.69     | 0.65       | -0.68      | -0.97 | 0.09  | -0.12 | -0.83 | -0.32 | 0.05  | -0.07 | -0.83 | -1    | -     |       |
|           | 1.09       | -0.51      | 0.65  | 0.32  | 0.08  | -0.3  | 0.11  | 0.04  | 0.28  | -0.05 | 1.43  | 1.36  |       |
| GENE933X  | 15896_at   | 15896_at   | 1     | -1.55 | -0.94 | -1.94 | -2.32 | -0.51 | -0.23 | -     |       |       |       |
| 2.05      | -0.47      | 1.41       | 0.41  | -1.08 | -1.05 | -1.08 | -0.34 | -0.51 | -0.18 | 0.18  | -1    | -1.51 |       |
|           | 0.1        | -0.55      | 0     | -0.12 | 0.22  | -0.12 | -0.55 | -0.34 | -0.08 | 0.4   | 1.04  | 0.48  |       |
| GENE932X  | 16279_at   | 16279_at   | 1     | -1.25 | -1.64 | -2.25 | -1.59 | -0.2  | 0.69  | -     |       |       |       |
| 2.18      | -0.86      | 0.53       | -0.66 | -0.35 | -1.73 | -1    | -0.45 | -0.91 | -0.43 | -0.86 | -0.26 | -0.32 |       |
|           | 0.21       | -0.41      | 0.33  | 0.33  | 0.91  | 0.53  | -0.28 | 0.88  | 0.17  | 0.27  | 0.01  | 0     |       |
| GENE931X  | 16432_g_at | 16432_g_at | 1     | -0.53 | -1.88 | -2    | -1.15 | -0.76 | -0.3  | -     |       |       |       |
| 1.55      | -1.32      | 0.49       | 0.05  | 0.09  | -0.53 | 0     | 0.23  | -0.3  | 0.13  | 0.31  | 0     | -0.1  |       |
|           | 0.07       | -0.08      | 0     | 0.15  | 0.41  | 0.16  | 0.16  | 0.6   | 0.41  | 0.32  | 0.31  | 0.26  |       |
| GENE1108X | 17583_s_at | 17583_s_at | 1     | 0.08  | 0.78  | -3.32 | -2.47 | -0.57 | 1.02  | -     |       |       |       |
| 0.12      | 1.27       | -0.68      | -1.15 | -0.86 | 0.13  | 0.16  | 0.97  | -0.66 | 0.08  | -0.05 | -0.76 | -     |       |
|           | 1.12       | -1         | -1.15 | -1.02 | -0.83 | -0.78 | -0.88 | -1.28 | -0.83 | -0.59 | -0.21 | -0.15 | -0.28 |
| GENE938X  | 18017_f_at | 18017_f_at | 1     | -0.83 | -0.76 | -1.94 | -1.78 | -0.68 | 0.59  | -     |       |       |       |
| 1.43      | 0.53       | -0.41      | -1.05 | -0.47 | 0.83  | 0.68  | 0.07  | -0.02 | 0.04  | -0.18 | -1.28 | -0.62 |       |
|           | 0.51       | -0.08      | 0     | -0.71 | -1.12 | -1.08 | -0.91 | -0.97 | 0.48  | -0.02 | -0.39 | 0.48  |       |
| GENE937X  | 18015_i_at | 18015_i_at | 1     | -1.55 | -1.78 | -4.05 | -2.18 | -0.78 | 1.61  | -     |       |       |       |
| 3.32      | 0.35       | 0.09       | -1    | -0.57 | 0.11  | -0.16 | -0.04 | -0.68 | -0.08 | -0.71 | -0.64 | -0.39 |       |
|           | 0.81       | -0.59      | 1.13  | -1.55 | -2    | -1.18 | -0.97 | -0.34 | 0     | -0.25 | -0.34 | -0.25 |       |
| GENE936X  | 18016_r_at | 18016_r_at | 1     | -0.86 | -1.64 | -4.32 | -2.12 | -1.78 | 0.08  | -     |       |       |       |
| 2.64      | 0.35       | -0.78      | -1.21 | -0.53 | -0.21 | -0.15 | 0.11  | -0.94 | 0.41  | 0.04  | -0.76 | -0.53 |       |
|           | 0.73       | -0.51      | -0.37 | -1.88 | -1.88 | -1.78 | -1.02 | -0.26 | 0.02  | 0     | -0.3  | 0.01  |       |
| GENE1104X | 13178_at   | 13178_at   | 1     | -0.53 | -0.34 | -1    | -1.55 | -1.83 | -1.08 | -     |       |       |       |
| 0.28      | -0.73      | -0.94      | -1.08 | -1    | -0.73 | -0.73 | -0.88 | -1.02 | -0.2  | 0.49  | -1.32 | -1.18 |       |
|           | 0.27       | -0.57      | -0.3  | -0.32 | -0.55 | -0.34 | 0.32  | 0.37  | 0.55  | 0.31  | -0.78 | 0     |       |
| GENE950X  | 18540_at   | 18540_at   | 1     | -0.18 | 0.32  | -1.12 | -1.64 | -1.15 | -0.73 | -     |       |       |       |
| 0.28      | -0.81      | -0.3       | -0.41 | 0.16  | -0.13 | -0.08 | -0.59 | -1    | 0.07  | 0.4   | -0.26 | 0.25  |       |
|           | 0.07       | 0.21       | -0.59 | -0.45 | -0.35 | -0.02 | -0.73 | 0.65  | 0     | 0.58  | 0     | 0.11  |       |

|           |            |            |       |       |       |       |       |       |       |       |       |       |
|-----------|------------|------------|-------|-------|-------|-------|-------|-------|-------|-------|-------|-------|
| GENE951X  | 19091_at   | 19091_at   | 1     | -0.81 | -0.64 | -0.86 | -1.35 | -0.81 | -0.73 |       |       |       |
|           | 0.01       | -0.39      | -0.34 | 0.01  | -0.04 | -0.23 | -0.45 | 0.05  | -0.49 | 0.29  | 0.37  | -0.81 |
|           | 0.12       | 0.31       | 0.12  | -0.39 | -1.32 | -1.08 | -0.55 | -0.16 | 1.01  | 0.25  | 0.25  | 0.08  |
| GENE952X  | 18311_at   | 18311_at   | 1     | -0.13 | -0.39 | -0.76 | -0.78 | -0.59 | -0.1  |       |       |       |
|           | 0.01       | 0.22       | 0.25  | -0.78 | 0.02  | -0.55 | 0.01  | 0.05  | -0.73 | -0.16 | 0.32  | -0.02 |
|           | 0.51       | 0.35       | 0.05  | -0.97 | -1.35 | -0.3  | -0.16 | -0.73 | -0.25 | 0.23  | 0.17  | -0.13 |
| GENE942X  | 16047_at   | 16047_at   | 1     | -0.32 | -0.12 | -3.32 | -1.73 | -1.02 | -0.76 | 0     |       |       |
|           | -0.12      | -0.51      | 0.66  | 0.71  | -0.12 | -0.3  | 0.21  | -0.94 | -0.41 | -0.21 | -0.01 | 0.77  |
|           | 0.22       | -0.2       | -0.53 | -0.08 | -0.1  | 0.31  | -0.66 | 0.81  | 0.5   | 1.96  | -0.16 | 0.34  |
| GENE941X  | 12901_s_at | 12901_s_at | 1     | -0.15 | -1.25 | -3.64 | -0.73 | -1.21 | -0.66 |       |       |       |
|           | 0.59       | -0.97      | -0.66 | 0.18  | 0.23  | -0.1  | -0.43 | -0.53 | -0.05 | 0.43  | -0.76 | 0.35  |
|           | 0.33       | -0.49      | -0.68 | -1.02 | -0.39 | -0.08 | -0.08 | -0.02 | -0.08 | -0.49 | -0.25 | 0.37  |
| GENE1154X | 16555_at   | 16555_at   | 1     | -1.59 | 0     | 0     | -4.05 | -0.15 | 0     |       |       |       |
|           | 0.26       | 0          | 0.65  | 0     | -1.43 | 0     | 0     | 1.37  | 0     | -0.28 | 0.08  | -1.47 |
|           | 1.47       | -0.91      | -2.32 | -0.35 | -1.51 | -0.83 | -0.39 | -0.39 | -0.94 | -0.76 | -0.78 | -0.21 |
| GENE1109X | 14091_r_at | 14091_r_at | 1     | -0.3  | -0.35 | -0.21 | -1.02 | 0.08  | 0.16  |       |       |       |
|           | 1.01       | 0.87       | -0.18 | -0.15 | -1.43 | -0.41 | -0.81 | -0.2  | -0.45 | -0.59 | -0.12 | -1.51 |
|           | 1.35       | 0.45       | -0.71 | -0.08 | -0.53 | -0.32 | -0.26 | -0.41 | -0.57 | -0.02 | -0.13 | -0.41 |
| GENE1113X | 12239_at   | 12239_at   | 1     | -1.15 | 0.54  | -1.35 | -3.18 | -0.81 | -0.35 |       |       |       |
|           | 0.37       | 0.71       | 1.13  | 1.31  | -1.12 | -1.73 | -1.69 | 0.66  | 0.17  | -1    | -0.1  | -1.02 |
|           | 1.4        | -1.02      | -0.25 | 0.54  | 1.23  | 0.49  | -0.05 | 0.48  | -0.12 | -0.53 | 2.59  | -0.51 |
| GENE1107X | 13967_at   | 13967_at   | 1     | -0.51 | -0.64 | -0.78 | -1.28 | -1.35 | -1.02 |       |       |       |
|           | 1.02       | 0.88       | -0.34 | -0.91 | 0.08  | -0.83 | 0.01  | 0.67  | -0.68 | 0.01  | 0.23  | -1.43 |
|           | 1.08       | 0.45       | -0.28 | -0.37 | 0.48  | 0.62  | 0.11  | -0.05 | 0.58  | -0.55 | 0.45  | 0.65  |
| GENE1151X | 18219_at   | 18219_at   | 1     | -1.43 | -0.71 | -0.78 | -1.35 | -0.68 | -1.47 |       |       |       |
|           | 0.65       | 0.11       | -0.02 | 0.81  | -0.13 | 0.22  | -0.2  | 1.26  | -0.13 | -0.16 | 0.23  | -0.39 |
|           | 0.97       | -0.26      | -0.91 | -0.94 | -0.64 | -0.45 | -0.12 | -0.35 | -0.45 | -0.41 | -0.34 | 0.05  |
| GENE1150X | 16039_s_at | 16039_s_at | 1     | -1    | -0.26 | -0.86 | -1.39 | -1.05 | -1.64 |       |       |       |
|           | 0.25       | -0.07      | -0.08 | -0.08 | -0.23 | -0.26 | -0.26 | -0.37 | 0.52  | -0.57 | 0.28  | 0.08  |
|           | 0.97       | -0.3       | -0.49 | -0.66 | -0.23 | -0.53 | -0.43 | -0.83 | -0.2  | -0.04 | 0.07  | -0.16 |
| GENE1149X | 14874_at   | 14874_at   | 1     | -1.05 | -1.32 | -1.18 | -2.32 | -1.59 | -1.59 |       |       |       |
|           | 2.03       | 0.48       | -0.1  | -0.53 | -0.12 | 0.11  | 0.28  | 1.26  | -0.71 | 0.4   | 0.02  | -0.83 |
|           | 2.25       | -0.47      | -0.94 | -2.73 | -1.12 | -0.73 | -0.64 | -1    | -1.35 | -0.45 | -0.43 | -0.43 |
| GENE1023X | 16742_at   | 16742_at   | 1     | -2.83 | -3.32 | -1    | -3.18 | -3.64 | -3.64 |       |       |       |
|           | 0.15       | 0.12       | -0.86 | -0.53 | -0.47 | -0.62 | -1.94 | -0.97 | -3.32 | -0.81 | 0.22  | 0     |
|           | 0.35       | -0.34      | -0.35 | -2.32 | -2.05 | -1.78 | -1.94 | 0.02  | -1.51 | -0.2  | -0.23 | 0.09  |
| GENE515X  | 12125_at   | 12125_at   | 1     | -0.49 | -0.91 | -0.68 | -0.76 | -1.08 | -0.88 |       |       |       |
|           | 0.07       | 0.05       | -0.39 | -0.2  | 0.08  | -0.59 | -0.53 | 0.29  | -0.26 | 0.12  | -0.66 | -0.05 |
|           | 0.08       | 0.07       | -0.37 | -0.68 | -0.57 | -0.43 | -0.3  | -0.57 | -0.3  | -0.39 | 0     | -0.01 |
| GENE1323X | 19371_at   | 19371_at   | 1     | -0.53 | -1.08 | 1.09  | -0.23 | -1.08 | -0.86 |       |       |       |
|           | 1.51       | -1.15      | -0.81 | 1.17  | 0.26  | -0.37 | -0.43 | -1.39 | 1.14  | -0.26 | -0.83 | 0.43  |
|           | 0.13       | -0.39      | -0.97 | 0.54  | 0.21  | 0.64  | 0.05  | 0.02  | -0.39 | -0.18 | 0.33  | -0.2  |
| GENE1322X | 17726_at   | 17726_at   | 1     | 0.32  | -0.91 | -0.08 | 0.54  | -1.18 | -0.47 |       |       |       |
|           | 1.88       | -0.78      | -1    | 0.29  | 0.41  | -0.68 | -1.47 | -0.41 | 0.43  | -0.08 | -0.55 | 0.41  |
|           | 0.41       | -0.35      | -0.81 | -0.76 | -0.2  | 0.21  | 0.37  | 0.8   | 0     | 0.35  | 0.76  | 0.54  |
| GENE1321X | 16347_at   | 16347_at   | 1     | 0.58  | -1.08 | 0     | 0     | -1.59 | -1.94 |       |       |       |
|           | 2.39       | -1.51      | -0.73 | 0     | 0     | -0.47 | -0.59 | -0.59 | 0     | 0.11  | -1    | 0     |
|           | 0.88       | -0.86      | 0.02  | 0.28  | 0.15  | 0.21  | -0.15 | 0.52  | -0.86 | -0.18 | -0.49 | 0.5   |
| GENE1320X | 16140_s_at | 16140_s_at | 1     | -0.07 | -1.28 | -1.02 | -0.28 | -1.02 | -0.23 |       |       |       |
|           | 1.55       | -1.18      | -0.39 | 0.32  | 0.17  | -0.78 | -0.94 | -1.02 | -0.08 | -0.05 | -0.34 | 0.71  |
|           | 0.64       | -0.15      | 0.05  | -0.32 | -0.21 | 0.08  | -0.16 | 0.25  | -0.25 | -0.25 | 0.44  | 0.32  |
| GENE1319X | 12540_at   | 12540_at   | 1     | -0.37 | -2.25 | 0     | -0.86 | -2.12 | -1.08 |       |       |       |
|           | 1.51       | -1.64      | -0.88 | 1.84  | 1.07  | -1.73 | -1.55 | -0.78 | 0     | -1.55 | 0.28  | -0.37 |
|           | 0.69       | -0.49      | -0.18 | -0.05 | 0.58  | 0.94  | -0.13 | 0.18  | -0.49 | -0.49 | 1.17  | 1.17  |
| GENE1292X | 17480_at   | 17480_at   | 1     | -1    | -1.59 | -0.39 | 0.23  | -1    | -0.39 |       |       |       |
|           | 1.08       | -1.78      | 0.08  | -0.59 | 0.53  | -0.59 | -0.47 | -0.81 | -0.16 | -0.15 | -0.21 | 1     |
|           | 0.29       | 0.34       | 0.65  | 0.53  | 0.18  | 0.01  | -0.34 | -0.41 | -0.49 | -0.34 | -0.12 | -0.02 |



|           |            |            |       |       |       |       |       |       |       |       |       |       |   |
|-----------|------------|------------|-------|-------|-------|-------|-------|-------|-------|-------|-------|-------|---|
| GENE977X  | 16113_s_at | 16113_s_at | 1     | -0.59 | -2.25 | -2.25 | -0.18 | -0.68 | -0.68 | -     |       |       |   |
| 3.18      | -3.64      | -0.68      | -0.21 | -0.86 | -0.73 | -0.57 | -3.64 | -0.21 | 0.28  | -0.64 | 0     | 0.15  | - |
| 0.64      | 0.32       | -0.68      | 1.13  | 1.37  | 1.26  | 0     | -1.28 | -0.41 | 0.32  | -0.1  | -0.21 | -     |   |
| GENE1238X | 16554_s_at | 16554_s_at | 1     | 0.46  | 0.37  | -1.43 | -0.53 | -0.49 | -1.21 | -     |       |       |   |
| 1.64      | -1.47      | -0.41      | -0.86 | -0.91 | -1.05 | -0.76 | -1.25 | -0.43 | -0.18 | 0.21  | -0.81 | -0.21 |   |
| 1.11      | 0.98       | -1.12      | 0.86  | 0.4   | 0.08  | -0.16 | 0.09  | -0.26 | -0.05 | -0.1  | 0.04  |       |   |
| GENE1237X | 16348_at   | 16348_at   | 1     | -0.26 | -0.49 | -0.64 | -1.32 | -1.59 | -1.02 | -2    |       |       |   |
| -1.88     | -0.59      | -0.23      | -0.59 | -0.83 | -0.66 | -1.15 | -0.12 | -0.39 | -0.39 | -0.37 | 0.73  |       |   |
| 1.22      | 0.49       | 0.05       | -0.12 | 0.09  | 0.55  | -0.15 | 0.36  | 0.21  | 0.69  | 0.54  | 0.79  |       |   |
| GENE1236X | 13550_at   | 13550_at   | 1     | 0.26  | -1.64 | -1.08 | -0.32 | -2.47 | -1.88 | -     |       |       |   |
| 2.73      | -2.47      | -1.88      | -1.94 | -1.39 | -1.59 | -1.69 | -2.94 | -0.59 | -1.02 | -1.05 | 0.43  | 1.58  |   |
| 1.32      | 2.18       | -0.41      | 1.04  | 0.34  | 0.17  | 0.01  | 1.7   | 0.79  | 1.45  | 0.38  | 0.59  |       |   |
| GENE1235X | 15493_at   | 15493_at   | 1     | -0.35 | -1    | -1.51 | -0.86 | -2    | -1.88 | -     |       |       |   |
| 2.18      | -2.64      | -1.18      | -1    | -0.37 | -0.94 | -0.81 | -1.73 | -1.25 | -0.66 | -1.94 | -0.86 | 0     |   |
| 1.36      | 0          | -0.81      | 0.53  | 0.34  | -0.15 | -0.39 | 0.73  | 0     | 1.22  | 0.35  | -0.49 |       |   |
| GENE1234X | 12926_s_at | 12926_s_at | 1     | -0.3  | -0.28 | -2.12 | -0.28 | -2    | -1.59 | -     |       |       |   |
| 1.47      | -1.88      | -1.73      | -0.05 | -0.81 | -0.45 | -1.35 | -2.39 | -0.62 | 0.05  | -1.15 | -0.32 | -0.43 | 1 |
| 0.21      | -1.73      | 0.34       | -0.21 | 0.12  | -0.51 | 0.87  | 0.07  | 0.46  | 0.37  | 1     |       |       |   |
| GENE1233X | 14064_at   | 14064_at   | 1     | -1.78 | -0.88 | -0.78 | -0.12 | -2.12 | -3.18 | -     |       |       |   |
| 2.12      | -3.64      | -3.64      | -1.28 | -0.86 | -0.94 | -0.81 | -3.64 | -0.12 | -1.78 | -2.18 | -0.37 | -0.68 |   |
| 0.91      | 0.94       | -2.94      | -0.08 | -0.81 | -0.81 | -0.94 | 0.16  | -0.2  | 0.16  | -0.91 | -1.12 |       |   |
| GENE1232X | 18968_at   | 18968_at   | 1     | -1.25 | -2    | -2.25 | 0     | -2.05 | -3.83 | -     |       |       |   |
| 2.25      | -4.32      | -3.83      | -1.35 | 0.26  | -0.86 | -0.51 | -3.18 | -2.25 | -2.83 | -2.83 | 0     | 0     | 0 |
| 0         | -3.83      | 0          | 0     | 0     | 0     | 0     | 0     | 0     | 0     | 0     |       |       |   |
| GENE1231X | 18969_g_at | 18969_g_at | 1     | -0.59 | -1.47 | -0.81 | 0.28  | -2.18 | -2.73 | -     |       |       |   |
| 2.18      | -3.47      | -3.32      | -0.32 | -0.18 | -0.83 | -0.55 | -2.64 | -1.25 | -1.43 | -2.47 | -0.18 | -0.86 | - |
| 0.26      | 0.26       | -3.32      | -0.26 | -0.26 | -0.26 | -0.68 | 0     | 0     | 0     | -0.26 | 0.41  |       |   |
| GENE1312X | 17538_at   | 17538_at   | 1     | -0.47 | 0.92  | -0.25 | -0.57 | -1.28 | -0.12 | -     |       |       |   |
| 0.02      | 0.15       | -1.02      | -0.12 | 0     | 0.81  | 0.68  | 0.11  | 0.08  | -0.55 | 0.11  | -0.45 | -     |   |
| 0.37      | 1.02       | -1.02      | -0.73 | -0.28 | 0     | -0.16 | -0.32 | -0.68 | -0.47 | -0.1  | 0.48  | 0.36  |   |
| GENE1311X | 12191_at   | 12191_at   | 1     | 0     | 0.4   | 0.18  | 0.17  | -1.05 | -2.55 | -     |       |       |   |
| 0.49      | -0.16      | -1.08      | -0.41 | -0.86 | -0.18 | -0.04 | 0.18  | 0.16  | -0.57 | -0.83 | -0.47 | -0.76 | - |
| 0.25      | -0.55      | -1.25      | -0.59 | -0.53 | -0.35 | -0.47 | -0.81 | -0.1  | -0.18 | 0.05  | 0.11  |       |   |
| GENE1310X | 13807_at   | 13807_at   | 1     | -0.16 | 0.04  | -0.39 | 0     | -1.47 | -0.66 | -     |       |       |   |
| 0.28      | 0.63       | -1         | 0.15  | -0.21 | 0.05  | 0.01  | -0.26 | 0.43  | -0.05 | 0.32  | -0.25 | -0.18 |   |
| 0.28      | -0.23      | -1.47      | -0.2  | -0.28 | -0.51 | -0.23 | 0.11  | -0.3  | -0.05 | 0.2   | 0.2   |       |   |
| GENE1309X | 18833_at   | 18833_at   | 1     | -0.51 | 0.77  | -0.1  | 0.4   | -1.69 | -1.15 | -     |       |       |   |
| 0.26      | 0.36       | -3.47      | 0.32  | -0.26 | 0.18  | -0.26 | -0.32 | 0.64  | -0.13 | 0.02  | -0.26 | 0.07  |   |
| 0.8       | 0.11       | -1.25      | -0.78 | -0.59 | -0.49 | -0.04 | 0.07  | -0.39 | 0     | 0.45  | 0.58  |       |   |
| GENE1308X | 12268_at   | 12268_at   | 1     | -1.18 | 0     | -0.01 | -0.21 | -1.78 | -1    | -     |       |       |   |
| 0.43      | -0.62      | -1.94      | 0.17  | -0.32 | 0.2   | 0.12  | -0.64 | 0.13  | -0.28 | 0.28  | -0.25 | -0.21 |   |
| 0.15      | -0.18      | -1.08      | -0.2  | -0.13 | -0.04 | -0.12 | 0     | -0.04 | -0.23 | 0.27  | 0.28  |       |   |
| GENE1307X | 13314_at   | 13314_at   | 1     | -0.83 | -0.05 | -0.47 | -0.3  | -2.39 | -2.25 | -     |       |       |   |
| 0.66      | -0.53      | -1.21      | 0.8   | 0.11  | 0.13  | -0.08 | -0.13 | 0.62  | 0     | 0.38  | -0.45 | -0.34 |   |
| 0.2       | -0.66      | -1.51      | -0.71 | 0.02  | 0.07  | -0.18 | -0.04 | -0.32 | 0.05  | 0.16  | 0.61  |       |   |
| GENE1313X | 13529_at   | 13529_at   | 1     | -1.21 | 0     | -1.21 | -1.51 | -1.88 | -1.94 | -     |       |       |   |
| 1.78      | -1.59      | -0.32      | 0.12  | -0.71 | 0.94  | 0.79  | -0.59 | 0.17  | -0.1  | -3.32 | -0.32 | -1.28 |   |
| 1.7       | 1.06       | -1.35      | -0.37 | -0.26 | -0.32 | -0.62 | 0.78  | -0.3  | 1.53  | 1.64  | 1.39  |       |   |
| GENE506X  | 14940_i_at | 14940_i_at | 1     | -1.39 | 0.52  | -0.51 | -1.59 | -1.51 | -1.78 | -     |       |       |   |
| 1.12      | -1.21      | -1.59      | 0.25  | -0.45 | 0.02  | -0.04 | -1.21 | -0.88 | -0.62 | -0.62 | -1.64 | -1.25 |   |
| 0.87      | -1.05      | -0.83      | -1.88 | -0.76 | -0.68 | -0.21 | -0.41 | -0.23 | -0.62 | 1.32  | 1     |       |   |
| GENE505X  | 14677_r_at | 14677_r_at | 1     | -0.2  | -0.62 | -0.37 | -0.97 | -1.94 | -1.35 | -     |       |       |   |
| 0.78      | -1.32      | -1.21      | 0.76  | -0.97 | -0.37 | -1.02 | -1.69 | -0.2  | -1.05 | -0.32 | -1.39 | -0.83 |   |
| 0.87      | -0.15      | -2.05      | -1.08 | -1.02 | -0.66 | -0.59 | 0.27  | -0.25 | 0.47  | 0.52  | 0.4   |       |   |
| GENE492X  | 19906_at   | 19906_at   | 1     | -0.73 | 0.16  | -1.55 | -0.68 | -2.55 | -1.43 | -     |       |       |   |
| 0.49      | -0.41      | -0.57      | -0.73 | -0.78 | 0.07  | 0.01  | -0.86 | -0.16 | -0.05 | -0.41 | -0.57 | -0.34 |   |
| 0.54      | -0.26      | -1.28      | -0.71 | -0.68 | -0.39 | -0.3  | -0.05 | 0.09  | -0.34 | 0.79  | 0.67  |       |   |

|           |            |            |       |       |       |       |       |       |       |       |       |       |       |
|-----------|------------|------------|-------|-------|-------|-------|-------|-------|-------|-------|-------|-------|-------|
| GENE999X  | 14023_at   | 14023_at   | 1     | 0.41  | 0.23  | -0.91 | -0.83 | -0.55 | -0.68 | -     |       |       |       |
| 1.05      | -0.18      | -0.25      | -0.35 | -0.57 | -0.12 | -0.16 | -0.47 | -0.62 | 0.45  | 0.23  | -0.41 | -0.49 |       |
|           | 0.34       | -0.04      | -0.51 | 0.07  | 0.23  | -0.07 | 0     | 0     | -0.3  | -0.13 | 0.61  | 0.31  |       |
| GENE998X  | 20649_at   | 20649_at   | 1     | 0     | -0.59 | -0.83 | -1.64 | -1.21 | -0.32 | -     |       |       |       |
| 1.78      | -1.25      | -0.28      | -0.45 | -0.64 | -0.51 | -0.39 | -0.73 | -0.45 | 0.44  | 0.87  | -1.05 | -0.51 |       |
|           | 0.64       | -0.32      | -0.51 | -0.12 | 0.12  | 0.27  | 0     | -0.43 | -0.04 | -0.23 | 0.37  | 0.11  |       |
| GENE997X  | 16367_i_at | 16367_i_at | 1     | 0.86  | -0.23 | -0.59 | -2.18 | -1    | -1.88 | -     |       |       |       |
| 3.32      | -1.18      | -0.43      | -0.3  | -0.41 | -0.62 | -0.26 | -0.41 | -0.3  | 1.36  | 1.95  | -0.83 | -0.62 |       |
|           | 1.53       | -0.55      | -0.81 | -1    | -0.02 | -3.32 | -1.32 | 0     | -0.15 | -0.18 | 2.2   | 0.37  |       |
| GENE996X  | 12453_at   | 12453_at   | 1     | 0.65  | 0.29  | -0.08 | -0.26 | -0.57 | -0.71 | -     |       |       |       |
| 1.12      | -0.55      | -0.28      | -0.12 | -0.23 | -0.1  | -0.15 | -0.53 | -0.26 | 0.28  | -0.2  | -0.62 | -0.05 |       |
|           | 0.53       | -0.13      | -0.81 | -0.39 | 0     | -0.28 | -0.12 | -0.05 | -0.43 | -0.32 | 1.07  | 0.65  |       |
| GENE995X  | 17331_at   | 17331_at   | 1     | 2.32  | -1.64 | -0.68 | 0     | -2.12 | -1.08 | -     |       |       |       |
| 2.94      | -1.88      | -1.02      | -0.68 | 0     | -1.18 | -0.64 | -1.21 | -0.68 | 1.24  | 1.24  | 0     | 1     |       |
|           | 0.9        | -1.59      | -1.69 | -1.55 | -1.12 | 0.15  | -1    | -0.91 | -1.32 | -0.45 | 1.08  | 1.45  |       |
| GENE1013X | 16422_at   | 16422_at   | 1     | -1    | -0.45 | -0.08 | -1.64 | -0.94 | -1.25 | -     |       |       |       |
| 0.47      | -0.91      | -0.45      | -0.12 | -0.86 | -0.39 | -0.32 | -1.08 | -0.2  | -0.53 | -0.34 | -0.91 | -1.08 |       |
|           | 0.83       | -0.83      | 0.04  | -0.05 | -0.34 | -0.49 | -0.04 | -0.66 | -0.28 | -0.15 | -0.91 | -0.94 |       |
| GENE1012X | 15366_at   | 15366_at   | 1     | -2.05 | -1.18 | -0.12 | -1.12 | -0.62 | -1.64 | -     |       |       |       |
| 1.43      | -1.69      | -0.94      | -1.21 | -1.12 | -1.08 | -0.55 | -1.94 | -1.21 | -1.08 | -0.68 | -1.73 | -2.05 |       |
|           | 1.94       | -1.59      | -0.83 | -1.25 | -1.35 | -0.59 | -0.78 | -2.18 | -0.3  | -0.32 | -1.39 | -1.15 |       |
| GENE1011X | 15481_at   | 15481_at   | 1     | -1.88 | -0.81 | 0.01  | -0.94 | -1.39 | -2.73 | -     |       |       |       |
| 1.18      | -1.55      | -1.43      | -0.68 | -1.08 | -0.81 | -0.32 | -1.88 | -0.78 | -0.43 | -0.43 | -1.28 | -1.83 |       |
|           | 1.83       | -1.43      | -1.47 | -1    | -1.18 | -0.59 | -0.81 | -1.83 | -0.2  | -0.64 | -1.55 | -1.35 |       |
| GENE1010X | 12815_at   | 12815_at   | 1     | -1.43 | -1.25 | -0.21 | -1.18 | -0.97 | -1.51 | -     |       |       |       |
| 0.18      | -0.39      | -0.3       | 0.04  | -0.15 | -0.39 | -0.26 | -0.64 | -0.41 | -1.21 | -1.25 | -0.45 | -1.47 |       |
|           | 2.47       | -1.59      | 0.23  | -0.47 | -0.68 | -0.34 | -0.12 | -1.83 | 0.26  | 0.26  | -1.78 | -2.12 |       |
| GENE1009X | 16001_at   | 16001_at   | 1     | -1.69 | -0.28 | 0.37  | -0.91 | -1.25 | -2.25 | -     |       |       |       |
| 0.41      | 0.02       | -1.39      | -0.15 | -0.81 | -0.25 | -0.3  | -0.21 | -0.62 | -2.25 | -1.78 | -1.18 |       |       |
|           | 1.35       | -2.12      | -1.28 | -0.25 | -0.1  | -0.41 | -0.73 | -0.41 | -1.94 | 0.21  | 0.27  | -1.83 | -2.18 |
| GENE1008X | 18176_at   | 18176_at   | 1     | -0.83 | -0.66 | -0.51 | -1    | -0.64 | -1.43 | -     |       |       |       |
| 0.3       | -0.16      | -0.37      | 0.31  | 0.4   | 0.62  | 0.4   | -0.13 | 0.21  | -0.15 | -0.25 | -0.13 | -1.43 |       |
|           | 1.43       | -0.34      | -0.47 | 0.26  | -0.16 | 0     | -0.26 | -0.62 | 0     | 0.08  | -1.43 | -1.02 |       |
| GENE1007X | 19406_at   | 19406_at   | 1     | -1.15 | -1.02 | -1.12 | -1.25 | -1.32 | -1.83 | -     |       |       |       |
| 0.28      | -0.1       | -0.45      | 0.05  | 0.28  | 0.15  | 0.11  | 0.48  | -0.25 | -0.51 | -0.78 | -0.64 | -1.43 |       |
|           | 1.47       | -1.47      | -0.62 | -0.66 | -0.57 | -0.37 | -0.88 | -1.78 | -0.3  | 0.29  | -0.73 | -0.53 |       |
| GENE1006X | 16553_f_at | 16553_f_at | 1     | -1.32 | -1.47 | -0.57 | -0.73 | -1.47 | -1.35 | -     |       |       |       |
| 0.17      | 0.34       | -0.76      | 0     | 0     | 0.13  | -0.16 | 0.67  | -0.41 | -0.55 | -0.25 | 0.01  |       |       |
|           | 0.94       | -1.15      | -0.45 | -0.66 | -0.81 | -0.94 | -1.47 | -0.64 | -0.51 | -0.21 | 0.21  | -1.25 | -1.21 |
| GENE1019X | 15096_at   | 15096_at   | 1     | -1.83 | -0.25 | -1.78 | -0.86 | -1.51 | -1.12 | -1    |       |       |       |
| -0.66     | -1.25      | -0.71      | -0.59 | -0.28 | -0.39 | -1    | -0.04 | -1.12 | -1.64 | -0.66 | -1.18 |       |       |
|           | 0.88       | -0.94      | -0.91 | -1.08 | -0.83 | -0.37 | -1.02 | -0.15 | -0.57 | -0.2  | -0.51 | 0.04  |       |
| GENE1003X | 18290_at   | 18290_at   | 1     | -1.28 | -1.32 | -1.35 | -1.02 | -1.47 | -2.18 | -1    |       |       |       |
| -0.94     | -1.35      | -0.2       | -0.08 | -0.16 | -0.16 | -0.49 | -0.78 | -1.25 | -1.15 | -0.57 | -1.18 |       |       |
|           | 1.08       | -0.64      | -1.28 | -0.59 | -1.05 | -1.21 | -0.64 | -0.39 | -0.08 | 0.17  | -1.28 | -1    |       |
| GENE1002X | 16030_s_at | 16030_s_at | 1     | -1.25 | -0.3  | -0.78 | -1.28 | -1.21 | -1.88 | -     |       |       |       |
| 1.02      | -1.32      | -0.62      | 0.18  | -0.49 | -0.13 | -0.23 | -0.62 | -0.51 | -0.41 | -0.81 | -0.81 | -1.21 |       |
|           | 1.12       | -0.78      | -0.88 | -0.49 | -0.41 | -0.34 | -0.76 | -0.26 | -0.43 | -0.28 | -0.66 | -0.32 |       |
| GENE1001X | 15131_s_at | 15131_s_at | 1     | -1.78 | -0.86 | -1.94 | -2.64 | -2.39 | -2.83 | -     |       |       |       |
| 1.69      | -1.83      | -1.59      | -0.86 | -1.18 | -0.94 | -0.78 | -1.32 | -1.12 | -1.43 | -1.02 | -1.18 | -1.69 |       |
|           | 1.88       | -1.78      | -0.86 | -0.86 | -0.78 | -0.88 | -0.71 | -1.18 | -0.18 | -0.35 | -1.15 | -1.32 |       |
| GENE1004X | 19398_at   | 19398_at   | 1     | -0.08 | -0.32 | -1.43 | 0.29  | -0.94 | -1.43 | -     |       |       |       |
| 1.25      | -1.18      | -1.39      | -0.13 | -0.39 | -0.86 | -0.18 | -0.71 | -0.73 | -0.68 | -0.68 | -0.59 | -0.78 |       |
|           | 1.15       | -0.59      | -0.53 | -0.28 | -0.32 | 0.01  | -0.16 | 0.01  | -0.21 | -0.05 | -0.59 | -0.25 |       |
| GENE1005X | 19977_at   | 19977_at   | 1     | -0.53 | -1.15 | -0.83 | -0.12 | -1.32 | -1.64 | -     |       |       |       |
| 0.64      | -0.55      | -1.94      | -0.1  | 0.62  | 0.51  | 0.42  | -0.1  | -0.39 | -2.12 | -2.18 | 0.08  | -1    | -2    |
|           | -1.39      | -0.49      | 0.25  | -0.21 | -0.76 | -0.15 | -1.51 | -1    | -0.76 | -0.83 | -0.94 |       |       |

|           |            |            |       |       |       |       |       |       |       |       |       |               |
|-----------|------------|------------|-------|-------|-------|-------|-------|-------|-------|-------|-------|---------------|
| GENE1130X | 19049_at   | 19049_at   | 1     | -0.73 | -0.02 | -0.39 | -0.81 | -0.57 | -0.83 |       |       |               |
|           | 0.01       | -0.02      | -0.34 | 0.12  | -0.13 | 0.47  | 0.54  | 0.27  | 0.15  | 0.28  | 0.2   | -0.55 -       |
|           | 0.68       | -0.35      | -0.83 | -0.55 | -1.43 | -1.32 | -0.68 | -0.18 | -0.37 | -0.1  | -0.21 | -0.15 0.02    |
| GENE1129X | 12088_at   | 12088_at   | 1     | -0.41 | 0.08  | 0.04  | -0.55 | -0.73 | -0.45 |       |       |               |
|           | 0.32       | -0.51      | -0.39 | -0.02 | 0.08  | -0.1  | 0.13  | -0.28 | 0     | 0.05  | 0.02  | 0.12 -0.47 -  |
|           | 0.02       | -0.57      | -0.55 | -1.02 | -0.86 | -0.57 | -0.15 | -0.35 | -0.16 | -0.26 | 0.02  | 0.09          |
| GENE1128X | 12214_g_at | 12214_g_at | 1     | -0.88 | -0.51 | -0.2  | -0.68 | -0.81 | -1.47 |       |       |               |
|           | 0.18       | -0.68      | -0.32 | 0     | 0.13  | -0.12 | -0.08 | -0.35 | -0.16 | 0.11  | -0.34 | -0.37 -0.91 - |
|           | 0.94       | -1         | -1.21 | -1.21 | -1.12 | -0.55 | -0.21 | -0.45 | -0.43 | -0.18 | -0.34 | -0.16         |
| GENE1127X | 19710_s_at | 19710_s_at | 1     | -1.32 | -0.26 | -0.37 | -0.97 | -0.81 | -1.15 |       |       |               |
|           | 0.26       | -0.59      | -0.3  | 0.07  | -0.2  | -0.26 | -0.28 | -0.34 | -0.23 | -0.25 | -0.05 | -0.71 -0.88 - |
|           | 0.49       | -0.53      | -1.05 | -1.28 | -1.25 | -0.66 | -0.41 | -0.1  | -0.08 | 0     | -0.28 | -0.07         |
| GENE1126X | 15972_at   | 15972_at   | 1     | -0.91 | -0.37 | -0.07 | -0.47 | -0.81 | -1.08 |       |       |               |
|           | 0.26       | -0.49      | -0.28 | 0.31  | -0.07 | 0.11  | 0     | 0.13  | 0.09  | -0.07 | -0.16 | -0.25 -0.62 - |
|           | 0.73       | -0.76      | -0.62 | -1.21 | -1.28 | -0.62 | -0.64 | -0.02 | -0.18 | 0.09  | -0.35 | 0.02          |
| GENE1125X | 13230_at   | 13230_at   | 1     | -0.81 | -0.86 | -0.26 | -0.64 | -0.88 | -0.97 |       |       |               |
|           | 0.76       | -0.59      | -0.08 | 0.21  | 0     | -0.07 | -0.12 | 0.21  | -0.12 | -0.02 | 0.21  | -0.51 -0.62 - |
|           | 1.43       | -0.86      | -0.53 | -1.39 | -1.35 | -0.83 | -0.45 | -0.02 | 0.07  | 0.21  | -0.32 | -0.05         |
| GENE1124X | 14712_s_at | 14712_s_at | 1     | -1.02 | -0.45 | -0.04 | -0.68 | -0.86 | -1    |       |       |               |
|           | 0.55       | 0.02       | -0.23 | 0.28  | -0.12 | 0.08  | -0.21 | 0.22  | -0.26 | -0.15 | -0.2  | -0.81 -1.28 - |
|           | 0.88       | -1.73      | -1.15 | -2.32 | -2.18 | -1.15 | -0.41 | 0.33  | 0.09  | 0.44  | 0.35  | -0.02         |
| GENE1210X | 12531_at   | 12531_at   | 1     | -0.68 | -0.97 | -0.39 | -0.91 | 0.01  | 0.08  |       |       |               |
|           | 0.08       | -0.23      | 0.22  | 0.41  | 0.09  | -0.45 | -0.21 | -0.3  | -0.05 | -0.15 | -0.66 | -0.12 -0.64 - |
|           | 0.39       | -0.64      | -0.21 | -1.32 | -1.25 | -0.62 | 0.12  | -1    | -0.1  | -0.05 | 0.05  | 0             |
| GENE1209X | 16486_at   | 16486_at   | 1     | -1.18 | -0.55 | -0.2  | -1.05 | -0.62 | -0.21 |       |       |               |
|           | 0.39       | -0.41      | 0.27  | 0.21  | -0.01 | 0     | -0.18 | -0.05 | 0.11  | 0.08  | -0.3  | -0.08 -0.41 - |
|           | 0.71       | -0.76      | 0.04  | -1.47 | -1.55 | -0.91 | -0.32 | -0.16 | -0.28 | -0.13 | -0.34 | -0.04         |
| GENE1187X | 15907_at   | 15907_at   | 1     | -1.59 | -0.25 | -0.43 | -0.66 | -0.37 | -0.3  |       |       |               |
|           | 0.18       | -0.23      | -0.3  | -0.13 | -0.28 | -0.49 | -0.32 | -0.08 | -0.37 | -0.25 | -0.73 | -0.16 -0.55 - |
|           | 0.64       | -1.28      | -0.21 | -1.02 | -1.08 | -0.47 | 0.18  | 0.15  | -0.28 | -0.39 | 0.13  | 0.02          |
| GENE700X  | 15383_at   | 15383_at   | 1     | -1.32 | -0.39 | -0.53 | -0.81 | -0.34 | -0.91 |       |       |               |
|           | 0.53       | -0.64      | 0.26  | 0.07  | -0.26 | -0.3  | -0.1  | -0.2  | -0.23 | -0.47 | -0.35 | -0.43 -0.37 - |
|           | 0.57       | -1         | -0.05 | -1.25 | -0.73 | -0.41 | 0.33  | -0.13 | -0.25 | -0.13 | -0.02 | -0.41         |
| GENE1184X | 16774_at   | 16774_at   | 1     | -0.43 | 0.18  | -0.34 | -0.62 | -0.78 | -0.68 |       |       |               |
|           | 0.45       | -0.21      | -0.37 | -0.57 | -0.23 | 0     | -0.02 | -0.28 | -0.39 | -0.02 | -0.08 | -0.23 -0.59 - |
|           | 0.41       | -0.37      | -0.32 | -1.18 | -0.83 | -0.68 | -0.62 | -0.32 | -0.21 | -0.07 | -0.21 | -0.07         |
| GENE1183X | 15256_at   | 15256_at   | 1     | -1.32 | -0.26 | -0.43 | -0.94 | -0.86 | -0.81 |       |       |               |
|           | 1.39       | -0.51      | -0.45 | -0.3  | -0.16 | -0.78 | -0.15 | -0.49 | -0.3  | 0.34  | -0.41 | -0.26 -0.37 - |
|           | 0.76       | -1.08      | -0.86 | -1.69 | -1.83 | -1.21 | -1.39 | -0.12 | -0.18 | 0     | -0.13 | 0.05          |
| GENE1176X | 12964_at   | 12964_at   | 1     | -0.55 | -0.47 | -0.81 | -0.97 | -0.88 | -0.97 |       |       |               |
|           | 0.59       | -0.86      | -0.64 | -0.83 | -0.37 | -0.71 | -0.49 | -0.55 | -0.71 | -0.26 | -0.68 | -0.45 -0.71 - |
|           | 0.32       | -0.62      | -0.47 | -1.35 | -0.94 | -1    | -1.12 | -0.88 | -0.28 | -0.16 | -0.71 | -0.25         |
| GENE1175X | 12124_at   | 12124_at   | 1     | -0.62 | -0.73 | -1.21 | -1.05 | -0.97 | -1.05 |       |       |               |
|           | 0.88       | -1.08      | -0.47 | -1    | -0.23 | -0.64 | -0.16 | -0.66 | -0.53 | 0.27  | -0.45 | -0.47 -0.47 - |
|           | 0.55       | -0.73      | -0.55 | -1.64 | -1.88 | -1.15 | -1.73 | -1.05 | 0.09  | -0.51 | -0.45 | -0.28         |
| GENE1174X | 17447_at   | 17447_at   | 1     | -1.15 | -1.25 | -1.15 | -1.25 | -1.25 | -1.25 | -0.94 |       |               |
|           | 0.66       | -0.59      | -0.53 | -0.47 | -0.21 | -0.64 | -0.59 | -0.59 | -0.68 | -0.28 | -0.62 | -0.26 -0.81 - |
|           | 0.78       | -0.73      | -0.45 | -0.88 | -0.97 | -0.66 | -1.55 | -0.57 | -0.23 | 0.11  | -0.53 | -0.3          |
| GENE1178X | 20154_at   | 20154_at   | 1     | -1.39 | -0.43 | -0.86 | -0.78 | -0.91 | -1    |       |       |               |
|           | 0.73       | -1.83      | -0.16 | -0.57 | -0.25 | -0.37 | -0.51 | -1    | -0.78 | -0.18 | -0.71 | -0.25 -0.91 - |
|           | 0.41       | -0.49      | -0.64 | -1.21 | -1.08 | -0.57 | -1.28 | -0.94 | -0.35 | 0.09  | -0.21 | -0.04         |
| GENE1177X | 20692_at   | 20692_at   | 1     | -0.71 | -0.26 | -0.68 | -0.76 | -1.18 | -1.43 |       |       |               |
|           | 0.49       | -1.12      | -0.37 | -0.59 | -0.41 | -0.32 | -0.32 | -0.37 | -0.64 | -0.08 | -0.12 | -0.37 -0.71   |
|           | 0.05       | -0.73      | -0.43 | -1    | -1.32 | -0.73 | -0.83 | -0.3  | -0.23 | 0.02  | -0.2  | 0.18          |
| GENE1173X | 12793_at   | 12793_at   | 1     | -1.28 | -0.88 | -0.97 | -0.88 | -1.35 | -1.88 |       |       |               |
|           | 1.02       | -2.32      | -0.04 | -0.2  | 0.01  | -0.16 | -0.05 | -0.26 | -0.68 | -0.34 | -0.37 | -0.51 -0.76 - |
|           | 1.08       | -1.18      | -0.76 | -1.51 | -1.73 | -0.88 | -1.18 | -0.49 | -0.2  | -0.2  | -1.02 | -0.28         |

|           |            |            |       |       |       |       |       |       |       |       |       |       |   |
|-----------|------------|------------|-------|-------|-------|-------|-------|-------|-------|-------|-------|-------|---|
| GENE1172X | 19402_at   | 19402_at   | 1     | -0.55 | -0.97 | -1.15 | -1.35 | -1.35 | -1.15 | -     |       |       |   |
| 1.43      | -1.55      | -0.25      | -0.41 | -0.05 | -0.35 | -0.41 | -0.83 | -0.59 | -0.15 | -0.3  | -0.37 | -0.68 | - |
| 0.45      | -0.94      | -0.37      | -1    | -1.12 | -0.76 | -1.12 | -0.76 | 0.04  | 0.29  | -0.88 | -0.18 | -     |   |
| GENE1171X | 12192_at   | 12192_at   | 1     | -1.05 | -2    | -1.28 | -1.47 | -2    | -1.88 | -     |       |       |   |
| 1.18      | -1.64      | -0.26      | -0.32 | 0.04  | -0.53 | -0.47 | -0.3  | -0.32 | 0.35  | -0.1  | -0.25 | -1.15 | - |
| 0.81      | -1.05      | -0.68      | -1.78 | -1.78 | -1.15 | -1.32 | -0.86 | -0.3  | 0.16  | -0.68 | -0.3  | -     |   |
| GENE1078X | 14478_at   | 14478_at   | 1     | -0.35 | -0.53 | -0.51 | -0.47 | -0.88 | -0.94 | -     |       |       |   |
| 0.78      | -0.86      | -0.32      | -0.76 | 0.28  | -0.57 | -0.25 | -0.49 | -0.53 | 0.01  | -0.12 | -0.35 | -0.37 | - |
| 0.45      | -0.62      | -0.57      | -1.18 | -0.88 | -0.3  | -1.43 | -1.32 | -0.53 | -0.1  | 0.2   | 0.48  | -     |   |
| GENE1142X | 19522_at   | 19522_at   | 1     | -0.88 | -0.88 | -0.47 | -0.57 | -0.49 | -0.88 | -     |       |       |   |
| 0.53      | -0.71      | -0.08      | 0.02  | -0.07 | 0.4   | 0.5   | -0.23 | 0.05  | 0.09  | -0.08 | -0.32 | -1.39 | - |
| 0.78      | -1.39      | -0.94      | -1.08 | -1.08 | -0.49 | -1.47 | -0.86 | -0.83 | -0.41 | -0.45 | -0.13 | -     |   |
| GENE1141X | 16674_at   | 16674_at   | 1     | -0.78 | -0.45 | -0.41 | -0.3  | -0.73 | -0.94 | -     |       |       |   |
| 0.94      | -0.83      | -0.59      | -0.26 | 0.02  | -0.07 | 0.16  | -0.35 | 0.01  | 0.21  | -0.28 | -0.64 | -0.62 | - |
| 0.68      | -0.94      | -0.91      | -1.32 | -1.02 | -0.86 | -1.51 | -0.43 | -0.45 | -0.34 | -0.53 | -0.32 | -     |   |
| GENE1139X | 18245_s_at | 18245_s_at | 1     | -0.71 | -0.66 | -0.76 | -1    | -1    | -0.94 | -     |       |       |   |
| 0.23      | -0.26      | -0.35      | 0.16  | 0     | 0.16  | -0.01 | 0.21  | 0.11  | 0.16  | -0.16 | -0.15 | -1.15 | - |
| 0.39      | -0.59      | -0.86      | -1.05 | -1.05 | -0.57 | -1.32 | -1.12 | -0.25 | -0.02 | -0.62 | -0.08 | -     |   |
| GENE1138X | 19362_at   | 19362_at   | 1     | -0.94 | -0.49 | -1.05 | -1    | -1.05 | -1.18 | -     |       |       |   |
| 0.59      | -0.62      | 0.05       | 0.38  | 0.54  | 0.16  | 0.2   | 0.02  | 0.08  | 0.21  | 0.16  | 0.02  | -0.76 | - |
| 0.51      | -0.83      | -0.68      | -1    | -1    | -0.55 | -0.86 | -0.71 | -0.39 | 0     | -0.45 | -0.16 | -     |   |
| GENE1137X | 19184_at   | 19184_at   | 1     | -1.28 | -1.51 | -1.43 | -1.69 | -2.55 | -1.73 | -     |       |       |   |
| 1.15      | -1.69      | -0.59      | 0.31  | 0.32  | 0.71  | 0.09  | -0.37 | 0.58  | 0.32  | -0.59 | -0.49 | -0.68 | - |
| 1.39      | -1.39      | -0.78      | -1.94 | -2.55 | -2.12 | -2    | -0.83 | -0.59 | -0.81 | 0     | -0.15 | -     |   |
| GENE1123X | 18344_at   | 18344_at   | 1     | -0.66 | -0.47 | -0.34 | -1.12 | -0.55 | -1.35 | -     |       |       |   |
| 1.15      | -0.97      | 0.12       | 0     | -0.23 | 0.11  | 0.08  | -0.78 | -0.39 | 0.31  | 0.31  | -0.35 | -0.86 | - |
| 0.71      | -1.43      | -1.02      | -1.35 | -0.94 | -0.49 | -0.12 | 0.04  | -0.04 | -0.1  | 0.63  | 0.46  | -     |   |
| GENE1122X | 18879_at   | 18879_at   | 1     | -1    | 0.04  | -0.94 | -0.73 | -0.62 | -0.76 | -     |       |       |   |
| 0.43      | -0.78      | -0.35      | 0.18  | 0.02  | 0.33  | 0.02  | -0.43 | -0.15 | 0.16  | 0.01  | -0.43 | -0.41 | - |
| 0.49      | -1.21      | -0.47      | -1.32 | -0.73 | -0.21 | -0.1  | -0.37 | -0.41 | -0.15 | -0.01 | 0.09  | -     |   |
| GENE1121X | 20315_i_at | 20315_i_at | 1     | -2.12 | 0     | -1    | -1.83 | -1.32 | -2.73 | -     |       |       |   |
| 0.78      | -1.28      | 0          | 0.16  | 0.52  | 0.58  | -0.28 | 0.49  | -0.64 | 0.55  | 0.29  | -0.16 | -0.88 | - |
| 0.59      | -1.47      | -1.69      | -2.73 | -2.05 | -1.28 | -0.53 | -0.41 | -0.59 | -0.47 | 0.2   | 0.26  | -     |   |
| GENE511X  | 16163_s_at | 16163_s_at | 1     | -3.18 | -1.73 | -1.69 | -1.94 | -1.43 | -1.32 | -     |       |       |   |
| 1.73      | -1.35      | 0.15       | 0.28  | 0.41  | -0.41 | -0.57 | 0     | -0.83 | -0.08 | -0.12 | -0.12 | -1    | - |
| 1.25      | -1.43      | -2.47      | -2.47 | -1.78 | -0.83 | -0.51 | 0.09  | -0.07 | 0.32  | -0.05 | 0.01  | -     |   |
| GENE510X  | 13613_at   | 13613_at   | 1     | -1.69 | -0.94 | -0.47 | -1.25 | -1.55 | -1.47 | -     |       |       |   |
| 1.02      | -1.02      | -0.23      | 0.12  | 0.04  | -0.34 | -0.3  | -0.55 | 0.04  | -0.05 | -0.15 | -0.1  | -0.83 | - |
| 1.02      | -0.78      | -0.94      | -1.05 | -0.97 | -0.66 | -0.21 | -0.13 | -0.3  | -0.15 | -0.41 | -0.28 | -     |   |
| GENE509X  | 13572_s_at | 13572_s_at | 1     | -1.59 | -1.18 | -1.02 | -1.32 | -1.51 | -1.78 | -     |       |       |   |
| 0.88      | -1.25      | -0.34      | -0.2  | -0.12 | -0.26 | -0.3  | -0.49 | -0.45 | -0.12 | -0.13 | -0.2  | -0.59 | - |
| 0.66      | -0.68      | -0.76      | -1.08 | -1    | -0.53 | -0.34 | -0.01 | -0.12 | 0.09  | -0.43 | -0.25 | -     |   |
| GENE508X  | 12212_at   | 12212_at   | 1     | -3.47 | -1.83 | -2.32 | -3.18 | -3.05 | -4.64 | -     |       |       |   |
| 1.69      | -2.55      | -0.62      | -0.07 | -0.05 | -0.32 | -0.51 | -0.68 | -0.51 | -0.66 | -0.59 | -0.55 | -1.59 | - |
| 1.59      | -2         | -1.69      | -2.12 | -1.64 | -0.59 | -0.26 | -0.23 | -0.18 | 0.26  | -0.66 | -0.57 | -     |   |
| GENE507X  | 20616_at   | 20616_at   | 1     | -2.32 | -2.12 | -1.69 | -1.47 | -2.12 | -2.73 | -     |       |       |   |
| 1.47      | -2.05      | -1.08      | 0.04  | 0.35  | -1.05 | -1.39 | -1.12 | -0.83 | -0.3  | -0.3  | -0.47 | -0.97 | - |
| 1.02      | -1.78      | -2.25      | -1.88 | -1.64 | -0.55 | -0.18 | -0.32 | -0.45 | -0.21 | 0.28  | -0.49 | -     |   |
| GENE262X  | 15471_at   | 15471_at   | 1     | -1.69 | -0.41 | -0.66 | -0.71 | -0.86 | -1.43 | -     |       |       |   |
| 1.12      | -1.39      | -0.37      | -0.16 | 0.09  | 0.17  | -0.04 | -0.97 | -0.62 | 0     | -0.2  | -0.02 | -0.71 | - |
| 0.41      | -0.97      | -0.59      | -1.25 | -1.25 | -0.53 | -0.35 | -0.16 | -0.13 | -0.08 | -0.41 | -0.13 | -     |   |
| GENE519X  | 19179_s_at | 19179_s_at | 1     | -0.55 | -0.41 | -0.57 | -0.43 | -0.88 | -1.08 | -     |       |       |   |
| 0.53      | -0.47      | -0.28      | 0.02  | 0.37  | -0.16 | -0.18 | -0.43 | -0.16 | 0.07  | -0.1  | 0.02  | -0.12 | - |
| 0.3       | -0.55      | -0.71      | -0.53 | -0.81 | -0.57 | -0.05 | 0.01  | -0.21 | -0.21 | 0.17  | 0.26  | -     |   |
| GENE518X  | 17479_at   | 17479_at   | 1     | -0.66 | -0.71 | -0.64 | -0.37 | -1.32 | -1.28 | -     |       |       |   |
| 0.49      | -0.86      | -0.3       | -0.13 | 0.37  | -0.3  | -0.39 | -0.34 | -0.23 | 0.01  | -0.49 | 0.22  | -0.32 | - |
| 0.66      | -1.02      | -0.41      | -0.47 | -0.57 | -0.04 | -0.23 | -0.43 | -0.47 | -0.25 | 0.36  | 0.41  | -     |   |

|           |            |            |       |       |       |       |       |       |       |       |       |       |   |
|-----------|------------|------------|-------|-------|-------|-------|-------|-------|-------|-------|-------|-------|---|
| GENE517X  | 17599_s_at | 17599_s_at | 1     | -1.43 | -0.78 | -0.39 | -0.68 | -1.83 | -2.55 | -     |       |       |   |
| 1.08      | -1.08      | -0.59      | 0     | -0.07 | -1.08 | -1.28 | -0.08 | -0.53 | -0.1  | 0.21  | 0.21  | -0.26 | - |
| 0.47      | -1.78      | -0.68      | -2    | -0.88 | -0.71 | 0.01  | -1    | -0.73 | -0.34 | -0.23 | 0.08  |       |   |
| GENE516X  | 19429_at   | 19429_at   | 1     | -2.05 | -1.28 | -0.97 | -0.55 | -1.94 | -1.94 | -     |       |       |   |
| 0.59      | -2         | -1.35      | -0.55 | -0.76 | -0.59 | -0.86 | -0.26 | -0.55 | -0.55 | -0.41 | -0.49 | -0.25 | - |
| 0.83      | -1.83      | -0.97      | -2.05 | -1.78 | -1.15 | -0.91 | -0.34 | -1.32 | -0.64 | -0.47 | -0.15 |       |   |
| GENE1191X | 13422_at   | 13422_at   | 1     | -0.73 | -0.32 | -0.18 | -0.51 | -0.32 | -0.47 | -     |       |       |   |
| 0.83      | -0.71      | -0.78      | -0.88 | -0.43 | -0.55 | -0.47 | -0.73 | -0.43 | -0.3  | -0.78 | -0.49 | -0.37 | - |
| 1.32      | -0.88      | -0.32      | -1.02 | -1.02 | -0.64 | -0.08 | -0.76 | -0.28 | -0.34 | -0.2  | -0.2  |       |   |
| GENE1190X | 18308_i_at | 18308_i_at | 1     | -0.83 | -1.05 | -0.05 | -0.81 | -0.68 | -0.41 | -     |       |       |   |
| 0.76      | -0.73      | -0.53      | -0.32 | 0.07  | -0.71 | -0.83 | -0.55 | 0.11  | -0.21 | -0.71 | 0.15  | -0.3  | - |
| 0.83      | -1.15      | -0.13      | -0.86 | -1.12 | -0.66 | -0.62 | -1    | -0.47 | -0.3  | -0.37 | -0.64 |       |   |
| GENE1189X | 13541_at   | 13541_at   | 1     | -0.76 | -0.16 | -0.37 | -0.66 | -0.43 | -0.16 | -     |       |       |   |
| 0.66      | -0.64      | -0.04      | -0.51 | -0.04 | -0.35 | -0.35 | -0.97 | -0.57 | -0.04 | -0.62 | -0.23 | -0.08 | - |
| 0.34      | -0.62      | -0.07      | -1.35 | -1    | -1.21 | 0     | -0.08 | -0.13 | -0.12 | -0.51 | -0.21 |       |   |
| GENE1188X | 19691_at   | 19691_at   | 1     | -1.35 | -0.62 | -0.55 | -0.83 | -0.68 | -1    | -     |       |       |   |
| 0.91      | -1.64      | 0.23       | -1.05 | -0.05 | -0.68 | -0.62 | -0.91 | -1.12 | 0.36  | -0.78 | 0.07  | -0.49 | - |
| 0.71      | -1.12      | 0          | -1.88 | -0.64 | -0.68 | -0.73 | -0.37 | -0.13 | -0.97 | -0.05 | -0.15 |       |   |
| GENE719X  | 12819_at   | 12819_at   | 1     | -0.41 | -0.86 | -1.08 | -0.66 | -1.02 | -0.49 | -     |       |       |   |
| 1.05      | -0.71      | -0.16      | -0.49 | 0.12  | -0.34 | -0.25 | -0.25 | -0.07 | 0.11  | -0.35 | 0.13  | 0.02  | - |
| 1.21      | -0.43      | 0.16       | -0.88 | -0.81 | -0.57 | -0.53 | 0     | -0.04 | -0.15 | -0.47 | -0.16 |       |   |
| GENE718X  | 16599_s_at | 16599_s_at | 1     | -0.91 | -0.78 | -1.12 | -0.23 | -1.32 | -0.76 | -     |       |       |   |
| 1.28      | -1.21      | -1         | 0     | 0.07  | -0.3  | -0.47 | -0.76 | -0.18 | -0.51 | -0.97 | 0.07  | -0.68 | - |
| 1.69      | -0.57      | -0.62      | -1    | -0.53 | -0.71 | -0.35 | -0.1  | 0.15  | 0.59  | -0.51 | -0.55 |       |   |
| GENE939X  | 13709_at   | 13709_at   | 1     | -0.71 | -0.59 | -1    | -0.23 | -0.55 | -0.23 | -     |       |       |   |
| 1.39      | -0.51      | -0.34      | -0.57 | 0.01  | 0.26  | 0.22  | -0.41 | -0.28 | 0.04  | -0.23 | -0.49 | -0.05 | - |
| 0.68      | -0.1       | -0.34      | -0.86 | -0.81 | -0.64 | 0.02  | -0.15 | 0.15  | -0.02 | -0.12 | 0     |       |   |
| GENE403X  | 20002_at   | 20002_at   | 1     | -0.86 | -0.28 | -1.05 | -0.49 | -1    | -1.51 | -     |       |       |   |
| 1.39      | -0.68      | -0.41      | -1.18 | 0.43  | -0.53 | -0.34 | -0.64 | -0.62 | -0.2  | -0.57 | -0.35 | -0.32 | - |
| 0.66      | -1.25      | -0.41      | -0.86 | -0.91 | -0.64 | -0.53 | -0.45 | -0.41 | -0.28 | -0.04 | -0.07 |       |   |
| GENE402X  | 19617_at   | 19617_at   | 1     | -1.28 | -0.53 | -1.32 | -0.86 | -1.05 | -0.45 | -     |       |       |   |
| 1.43      | -1.05      | -0.62      | -0.91 | 0     | -0.26 | 0.02  | -0.94 | -0.53 | -0.66 | -0.94 | -0.37 | -0.37 | - |
| 0.04      | -1         | -0.2       | -0.83 | -0.68 | -0.07 | -0.1  | -0.94 | -0.21 | -0.21 | -0.51 | -0.23 |       |   |
| GENE1196X | 17461_at   | 17461_at   | 1     | -0.78 | -0.53 | -1    | -1.35 | -0.1  | 0.26  | -     |       |       |   |
| 0.32      | -0.41      | 0.15       | -1    | -0.41 | -0.66 | -0.49 | -0.88 | -0.97 | -0.45 | -0.07 | -0.62 | -0.53 | - |
| 0.21      | -0.73      | 0.31       | -1.12 | -1.12 | -1.05 | -0.53 | -0.51 | -0.05 | -0.08 | 0.04  | -0.02 |       |   |
| GENE1195X | 17361_s_at | 17361_s_at | 1     | -1.83 | -0.62 | -0.83 | -1.73 | -0.37 | -0.47 | -     |       |       |   |
| 1.25      | -2.12      | 0.12       | -0.94 | -0.78 | -1.55 | -1.18 | -1.83 | -0.55 | -0.64 | -0.76 | -0.81 | -0.94 | - |
| 0.68      | -1.21      | 0.12       | -2.64 | -2.55 | -0.86 | -0.91 | -0.21 | -0.47 | -0.12 | -0.32 | 0.07  |       |   |
| GENE1194X | 17408_at   | 17408_at   | 1     | -1.47 | -0.73 | -2    | -2.25 | -0.81 | -1.08 | -     |       |       |   |
| 1.43      | -2.83      | 0.2        | -2.83 | -1.08 | -1.83 | -2.05 | -2.55 | -2.83 | -1.18 | -0.83 | -1.21 | -0.21 | - |
| 1.47      | -2.12      | -0.45      | -3.05 | -2.73 | -1.25 | -1.43 | -0.47 | -0.66 | -0.37 | -0.49 | 0.13  |       |   |
| GENE1193X | 18592_at   | 18592_at   | 1     | -0.73 | -0.83 | -0.86 | -1.21 | -0.53 | -0.15 | -     |       |       |   |
| 1.47      | -0.76      | 0.08       | -0.64 | -0.53 | -1.08 | -0.68 | -1.12 | -1    | -0.25 | -0.53 | -1    | -1.64 | - |
| 1.05      | -1.78      | -0.47      | -1.88 | -1.32 | -0.62 | -1.39 | -1.08 | -0.41 | -0.64 | -0.57 | -0.16 |       |   |
| GENE1192X | 13447_at   | 13447_at   | 1     | -0.71 | -0.15 | -1.88 | -3.05 | -0.86 | -0.41 | -     |       |       |   |
| 1.21      | -0.71      | -1.43      | -1.55 | -1.88 | -0.94 | -0.39 | -2.47 | -1.39 | -1.08 | -1.18 | -2    | -1.08 | - |
| 0.15      | -3.18      | -3.18      | -2.73 | -1.64 | -1    | -0.73 | -0.81 | -1.83 | -1.39 | -0.94 | 0.36  |       |   |
| GENE1153X | 17019_s_at | 17019_s_at | 1     | -1.25 | -1.28 | -2    | -1.39 | -0.15 | -0.47 | -     |       |       |   |
| 0.68      | -0.41      | -0.3       | -0.51 | -1.59 | 0.21  | -0.13 | 0.16  | -0.73 | -0.12 | 0.35  | -1.39 | -1.59 | - |
| 1.15      | -1.73      | -0.47      | -1.64 | -1.25 | -0.64 | -0.21 | -2    | -1.43 | -1    | 0.04  | 0.2   |       |   |
| GENE1198X | 19998_at   | 19998_at   | 1     | -1.51 | -0.78 | -1.83 | -1.94 | 0.05  | -0.34 | -     |       |       |   |
| 1.15      | -0.66      | -0.12      | -1.88 | -0.08 | -1.15 | -0.39 | -0.55 | -1.83 | -0.86 | -0.26 | -1.69 | -0.94 | - |
| 1.55      | -2.25      | -0.73      | -1.83 | -1.28 | -0.41 | 0.35  | -1.64 | -0.71 | -0.57 | 0.59  | 0.21  |       |   |
| GENE1197X | 17572_s_at | 17572_s_at | 1     | -2.12 | -1.88 | -2.94 | -2.32 | -0.49 | -0.49 | -     |       |       |   |
| 0.68      | -0.68      | -0.49      | -2.39 | -1.47 | -1.88 | -1.88 | -0.68 | -2.94 | -1.25 | -0.81 | -2.05 | -1.47 | - |
| 1.47      | -3.47      | -0.49      | -2.83 | -2.39 | -1.18 | -0.59 | -0.62 | -1.05 | -0.76 | -0.15 | 0.02  |       |   |

|           |            |            |       |       |       |       |       |       |       |       |       |       |   |
|-----------|------------|------------|-------|-------|-------|-------|-------|-------|-------|-------|-------|-------|---|
| GENE382X  | 13544_at   | 13544_at   | 1     | -2    | -1.73 | -1.73 | -1.83 | -0.86 | -0.59 | -1    |       |       |   |
|           | -0.88      | 0.09       | -1.12 | -0.26 | -1.05 | -0.81 | 0.28  | -1.18 | -0.41 | -0.34 | -0.25 | -0.05 | - |
| 1.43      | -1.88      | -0.45      | -1.83 | -1.39 | -0.78 | -0.41 | -0.49 | -0.71 | -0.62 | 0.01  | 0.21  |       |   |
| GENE381X  | 18835_at   | 18835_at   | 1     | -2.18 | -1.39 | -2.18 | -1.94 | -1.08 | -1.25 | -     |       |       |   |
| 1.05      | -1.47      | -0.28      | -1.18 | -0.49 | -0.86 | -0.91 | -0.45 | -1.18 | -0.37 | 0.09  | -0.57 | -0.86 | - |
| 0.88      | -1.88      | -0.37      | -1.88 | -1.35 | -0.32 | -0.28 | -0.78 | -0.73 | -0.57 | -0.12 | 0.09  |       |   |
| GENE380X  | 15511_s_at | 15511_s_at | 1     | -1.83 | -1.15 | -1.69 | -1.32 | -1.35 | -1.73 | -     |       |       |   |
| 1.51      | -1.59      | -0.12      | -1.59 | -0.07 | -0.66 | -0.73 | -0.83 | -1.28 | -0.16 | -0.45 | -0.59 | -1.32 | - |
| 1.55      | -2.47      | -0.94      | -1.88 | -1.64 | -0.53 | -0.71 | -1.28 | -0.94 | -0.57 | -0.32 | 0.2   |       |   |
| GENE712X  | 18354_at   | 18354_at   | 1     | -0.91 | -0.66 | -2.25 | -1.64 | -0.91 | -0.59 | -     |       |       |   |
| 0.76      | -0.47      | -0.13      | -0.34 | 0.27  | 0.2   | 0.17  | 0.22  | -0.15 | 0.46  | 0.28  | -0.25 | -0.71 | - |
| 1.39      | -1.73      | -0.57      | -2.39 | -1.59 | -1    | -0.55 | -0.62 | -0.15 | 0.01  | -0.32 | 0.18  |       |   |
| GENE711X  | 18503_at   | 18503_at   | 1     | -2.83 | -1.39 | -1.94 | -2.83 | -0.94 | -0.94 | -     |       |       |   |
| 1.51      | -0.88      | 0.6        | -0.21 | 0.33  | 0.04  | -0.15 | -0.13 | -0.73 | 0.02  | 0.11  | -0.28 | -0.78 | - |
| 0.91      | -2.94      | -0.81      | -3.18 | -2.47 | -0.91 | -0.18 | -0.66 | -0.78 | -0.51 | 0.68  | 0.77  |       |   |
| GENE710X  | 12765_at   | 12765_at   | 1     | -1.21 | -0.32 | -1.78 | -2.47 | -0.91 | -0.49 | -     |       |       |   |
| 0.39      | 0          | -0.05      | -0.35 | 0     | -0.08 | 0.01  | 0.12  | -0.68 | -0.1  | 0.31  | -0.2  | -1.32 | - |
| 0.34      | -1.43      | -0.41      | -1.47 | -1.12 | -0.53 | -0.32 | -0.41 | -0.05 | 0.01  | -0.76 | -0.41 |       |   |
| GENE709X  | 12795_at   | 12795_at   | 1     | -1.32 | -0.71 | -1.35 | -1.69 | -1.25 | -0.66 | -     |       |       |   |
| 0.05      | 0          | -0.26      | -0.41 | -0.23 | -0.18 | -0.25 | 0.09  | -0.76 | -0.21 | -0.28 | -0.25 | -0.66 | - |
| 0.78      | -1.18      | -0.57      | -1.73 | -1.69 | -0.88 | -0.41 | -0.12 | -0.05 | 0.12  | -0.49 | -0.15 |       |   |
| GENE1179X | 20057_at   | 20057_at   | 1     | -1.18 | -0.55 | -0.68 | -1.28 | -0.34 | -1.35 | -     |       |       |   |
| 0.3       | -1.25      | -0.37      | -0.49 | -0.45 | -0.25 | -0.32 | -0.15 | -0.83 | -0.32 | -0.55 | -0.81 | -0.73 | - |
| 0.3       | -0.78      | -0.2       | -1.39 | -1.35 | -0.81 | -0.39 | -0.49 | -0.53 | -0.47 | -0.43 | -0.23 |       |   |
| GENE383X  | 19396_at   | 19396_at   | 1     | -2.12 | -1    | -1.39 | -2.12 | -0.76 | -0.51 | -     |       |       |   |
| 1.39      | -1.47      | 0.48       | -0.78 | -0.26 | -0.66 | -0.57 | -0.59 | -0.88 | -0.35 | -0.53 | -0.18 | -0.76 | - |
| 0.78      | -1.21      | 0.48       | -1.73 | -1.94 | -1.47 | -1.18 | -1    | -0.88 | -0.51 | -0.53 | 0     |       |   |
| GENE699X  | 14010_at   | 14010_at   | 1     | -0.78 | -0.78 | -0.64 | -1.21 | -0.32 | -1    | -     |       |       |   |
| 0.21      | -1         | 0.37       | -0.35 | -0.21 | -0.28 | -0.08 | -0.86 | -0.18 | 0.09  | 0.29  | -0.25 | -0.51 | - |
| 0.62      | -0.88      | 0.02       | -1.02 | -0.81 | -0.37 | -0.23 | -0.55 | -0.32 | -0.37 | 0.08  | -0.25 |       |   |
| GENE1165X | 19030_at   | 19030_at   | 1     | -1.88 | -0.41 | -1.12 | -1.64 | -0.68 | -0.86 | -     |       |       |   |
| 0.39      | -0.81      | 0.26       | -1.05 | -0.37 | -0.37 | 0.07  | -0.53 | -1.43 | -0.47 | -0.43 | -0.59 | -0.59 | - |
| 0.34      | -0.49      | -0.26      | -1.64 | -1.32 | -0.83 | -0.66 | 0.37  | 0.13  | -0.25 | -0.43 | -0.21 |       |   |
| GENE1164X | 14056_at   | 14056_at   | 1     | -0.78 | -0.47 | -0.94 | -0.91 | -0.51 | -0.57 | -     |       |       |   |
| 0.45      | -0.55      | 0.02       | -0.39 | -0.08 | -0.02 | -0.02 | -0.25 | -0.49 | 0.05  | -0.13 | -0.39 | -0.12 | - |
| 0.39      | -0.35      | 0.26       | -1.05 | -1.21 | -0.64 | -0.25 | 0.04  | 0.21  | 0.27  | -0.32 | -0.15 |       |   |
| GENE1163X | 16382_at   | 16382_at   | 1     | -1.35 | -1.59 | -2    | -1.69 | -0.88 | -1.05 | -     |       |       |   |
| 0.73      | -1.12      | -0.28      | -0.94 | -0.55 | -0.43 | 0.07  | -0.39 | -1.28 | 0.01  | -0.41 | -0.3  | -0.26 | - |
| 0.59      | -0.71      | -0.37      | -1.51 | -1.78 | -0.91 | -0.71 | -0.41 | 0     | -0.28 | -0.45 | -0.13 |       |   |
| GENE545X  | 19832_s_at | 19832_s_at | 1     | -0.88 | -0.55 | -1.94 | -2.05 | -0.94 | -1    | -     |       |       |   |
| 0.47      | -1.28      | -0.02      | -0.94 | -0.13 | -1.15 | -0.05 | -0.37 | -1.12 | 0.33  | 0.18  | -0.71 | -1.25 | - |
| 0.88      | -1.43      | -0.59      | -1.35 | -1.02 | -0.59 | 0.04  | -0.26 | -0.07 | -0.32 | -0.13 | 0.01  |       |   |
| GENE544X  | 16046_s_at | 16046_s_at | 1     | -0.78 | -0.64 | -1.05 | -1.78 | -0.94 | -1.28 | -     |       |       |   |
| 0.62      | -0.78      | -0.23      | -0.39 | -0.73 | -0.43 | -0.49 | -0.26 | -0.76 | -0.32 | -0.07 | -0.73 | -1.15 | - |
| 0.76      | -1.02      | -0.37      | -1.15 | -1.05 | -0.86 | -0.12 | -0.12 | 0     | 0.05  | -0.55 | -0.41 |       |   |
| GENE543X  | 13162_at   | 13162_at   | 1     | -1.32 | -0.2  | -1    | -2.18 | -1.18 | -1.64 | -     |       |       |   |
| 0.59      | -0.94      | 0.08       | -1.05 | -0.73 | -0.64 | -0.13 | -0.71 | -1.35 | 0.11  | 0.07  | -0.81 | -1.73 | - |
| 0.26      | -1.08      | -0.25      | -1.35 | -1.35 | -1.18 | -0.43 | -0.68 | -0.13 | -0.08 | -0.83 | -0.04 |       |   |
| GENE542X  | 18917_i_at | 18917_i_at | 1     | -2.25 | -0.88 | -2.39 | -2.55 | -1.12 | -1.02 | -     |       |       |   |
| 0.91      | -1.39      | 0.23       | -0.78 | -0.1  | 0     | -0.16 | 0.04  | -1.25 | 0.35  | 0.52  | -0.32 | -1.02 | - |
| 0.53      | -1.55      | -0.45      | -1.78 | -1.59 | -0.57 | -0.57 | -0.71 | -0.39 | -0.3  | -0.25 | 0.15  |       |   |
| GENE541X  | 18743_f_at | 18743_f_at | 1     | -2.47 | -2.12 | -3.32 | -4.05 | -2.05 | -2.05 | -     |       |       |   |
| 2.05      | -1.05      | 0.41       | -1.08 | 0     | -0.25 | -0.43 | 0     | -2.47 | 0.17  | -0.13 | -1.28 | -1.12 | - |
| 1.18      | -2         | -0.55      | -2.12 | -1.69 | -0.28 | -1.35 | -0.68 | -0.01 | -0.39 | -0.43 | -0.01 |       |   |
| GENE540X  | 16811_at   | 16811_at   | 1     | -1.43 | -0.66 | -1.88 | -1.83 | -1.18 | -0.66 | -     |       |       |   |
| 1.18      | -0.81      | -0.35      | -0.88 | -0.49 | -0.04 | -0.04 | -0.3  | -0.83 | -0.07 | 0.18  | -0.41 | -1.25 | - |
| 0.55      | -0.91      | -0.41      | -1.47 | -1.32 | -0.53 | -1    | -0.68 | -0.26 | -0.02 | -0.73 | -0.18 |       |   |

|          |            |            |       |       |       |       |       |       |       |       |       |       |       |   |
|----------|------------|------------|-------|-------|-------|-------|-------|-------|-------|-------|-------|-------|-------|---|
| GENE539X | 17555_s_at | 17555_s_at | 1     | -4.64 | -1.05 | -4.64 | -4.32 | -3.64 | -2.83 | -     |       |       |       |   |
|          | 2.47       | -1.78      | -0.78 | -0.88 | -0.35 | -0.47 | -0.64 | -0.76 | -1.55 | -0.01 | -0.25 | -0.26 | -2.39 | - |
|          | 2.32       | -3.05      | -1.88 | -3.05 | -2.73 | -1.08 | -1.55 | -0.43 | -0.1  | 0.08  | -0.73 | -0.35 |       |   |
| GENE538X | 15344_at   | 15344_at   | 1     | -1.59 | -0.97 | -1.47 | -2.64 | -1.25 | -0.86 | -     |       |       |       |   |
|          | 0.62       | -0.88      | -0.51 | -1.47 | -0.49 | -0.13 | -0.13 | -0.34 | -0.86 | -0.26 | 0.04  | -0.68 | -0.88 | - |
|          | 0.73       | -0.86      | -0.43 | -1.08 | -1    | -0.34 | -0.26 | -0.34 | -0.37 | -0.16 | -0.45 | -0.23 |       |   |
| GENE537X | 14533_i_at | 14533_i_at | 1     | -2.83 | -1.12 | -2.64 | -2.73 | -2.55 | -2.05 | -     |       |       |       |   |
|          | 0.97       | -1.18      | -0.05 | -2.12 | -0.91 | -0.91 | -0.12 | -0.97 | -2.64 | -0.62 | -0.32 | -0.68 | -1.32 | - |
|          | 1.73       | -2.12      | -0.55 | -1.64 | -1.55 | -0.81 | -0.76 | -0.94 | -0.62 | -0.91 | -0.32 | -0.08 |       |   |
| GENE626X | 20020_at   | 20020_at   | 1     | -1.25 | -0.51 | -1.78 | -1.64 | -0.83 | -0.71 | -     |       |       |       |   |
|          | 1.05       | -0.88      | -0.1  | -0.01 | -0.21 | 0.28  | -0.05 | -0.35 | -0.32 | 0.05  | 0.41  | -0.07 | -0.73 | - |
|          | 0.62       | -0.51      | -0.55 | -0.3  | -0.32 | 0.17  | -0.73 | -0.39 | -0.07 | -0.2  | -0.49 | -0.25 |       |   |
| GENE625X | 15829_at   | 15829_at   | 1     | -1    | -0.68 | -1.78 | -2.39 | -1.05 | -0.41 | -     |       |       |       |   |
|          | 0.94       | -1.05      | -0.28 | -0.23 | -0.26 | -0.04 | -0.13 | -0.37 | -0.55 | -0.02 | 0.07  | -0.66 | -0.64 | - |
|          | 0.32       | -0.68      | -0.45 | -0.88 | -0.73 | -0.37 | -0.62 | -0.73 | -0.51 | -0.37 | 0.02  | 0.09  |       |   |
| GENE624X | 20196_at   | 20196_at   | 1     | -1.55 | -0.76 | -2.32 | -2.83 | -1.59 | -1.25 | -     |       |       |       |   |
|          | 1.78       | -1.88      | -0.28 | -0.1  | -1.12 | 0.17  | 0.25  | -0.28 | -0.28 | 0.25  | -0.53 | -0.83 | -1.02 | - |
|          | 0.55       | -0.64      | -0.78 | -0.53 | -0.83 | 0     | -0.88 | -0.91 | -0.1  | -0.12 | -0.32 | 0.11  |       |   |
| GENE621X | 14098_at   | 14098_at   | 1     | -0.73 | -0.73 | -1.25 | -2.32 | -1.32 | -0.94 | -     |       |       |       |   |
|          | 1.05       | -0.73      | -0.51 | -0.26 | -0.34 | 0.22  | 0.17  | -0.43 | -0.12 | 0.44  | 0.33  | -0.08 | -0.62 | - |
|          | 0.25       | -0.55      | -0.88 | -0.34 | -0.3  | -0.25 | -0.41 | -0.64 | -0.07 | -0.13 | -0.62 | -0.66 |       |   |
| GENE620X | 12166_i_at | 12166_i_at | 1     | -1.39 | -2.55 | -2.83 | -4.05 | -2.73 | -2.39 | -     |       |       |       |   |
|          | 2.94       | -2.55      | -1.21 | 0.61  | 0.23  | 0.84  | -0.1  | -1.12 | -0.04 | 0.94  | 0.87  | -0.04 | -1.02 | - |
|          | 0.64       | -1.32      | -2.73 | -1.55 | -1.21 | -0.83 | -1.64 | -0.86 | -0.41 | -0.68 | -1    | -0.25 |       |   |
| GENE590X | 16118_s_at | 16118_s_at | 1     | -0.64 | -0.49 | -1.59 | -1.88 | -1.32 | -0.86 | -     |       |       |       |   |
|          | 0.71       | -0.57      | -0.32 | -0.32 | -0.45 | 0.08  | 0.04  | -0.1  | -0.53 | 0.08  | 0.23  | -0.49 | -0.49 | - |
|          | 0.32       | -0.55      | -0.64 | -1.02 | -0.91 | -0.76 | -0.21 | -0.15 | 0.28  | 0.01  | 0.09  | 0.02  |       |   |
| GENE589X | 16296_at   | 16296_at   | 1     | -1.64 | -0.94 | -1.83 | -2    | -1.39 | -1    | -     |       |       |       |   |
|          | 0.78       | -0.53      | -0.37 | -0.1  | -0.12 | -0.25 | -0.2  | -0.15 | -0.25 | -0.01 | -0.13 | -0.49 | -0.39 | - |
|          | 0.37       | -0.57      | -0.59 | -1.25 | -1.05 | -0.49 | -0.28 | -0.21 | -0.12 | 0.07  | -0.16 | -0.04 |       |   |
| GENE588X | 12001_at   | 12001_at   | 1     | -2.25 | -1.69 | -3.32 | -3.64 | -3.18 | -2.39 | -     |       |       |       |   |
|          | 1.83       | -1.69      | -0.28 | -0.05 | 0.37  | -0.13 | -0.18 | -0.3  | -0.68 | 0.07  | 0.33  | -0.39 | -1.12 | - |
|          | 0.62       | -1.55      | -1.47 | -2.12 | -1.69 | -0.71 | -0.45 | -0.57 | -0.12 | -0.13 | 0.32  | 0.05  |       |   |
| GENE566X | 14990_at   | 14990_at   | 1     | -1.28 | -0.49 | -2.83 | -2.12 | -1.88 | -2.32 | -     |       |       |       |   |
|          | 1.35       | -0.81      | -1.43 | 0.04  | -0.2  | 0.04  | 0     | -1    | 0.09  | 0.21  | 0.09  | -0.73 | -1.78 | - |
|          | 0.78       | -1.12      | -1.28 | -1.02 | -1.43 | -0.57 | -0.57 | -0.59 | -0.47 | -0.49 | -0.15 | 0     |       |   |
| GENE565X | 18933_at   | 18933_at   | 1     | -1.08 | -0.37 | -2.39 | -1.94 | -2.47 | -1.43 | -     |       |       |       |   |
|          | 0.78       | -0.39      | -0.53 | -0.28 | -0.23 | 0.11  | -0.15 | -0.25 | -0.59 | 0.2   | -0.49 | -0.55 | -1.08 | - |
|          | 0.76       | -0.53      | -1.32 | -1.35 | -1.59 | -0.81 | -1.47 | -1.21 | -0.16 | -0.07 | -0.62 | -0.43 |       |   |
| GENE642X | 14075_at   | 14075_at   | 1     | -1.21 | -0.64 | -1.21 | -1.21 | -1.28 | -0.64 | -     |       |       |       |   |
|          | 0.76       | -0.73      | -0.07 | -0.26 | 0.16  | 0.08  | 0.07  | 0.02  | -0.18 | 0.21  | 0.23  | 0.2   | -0.2  | - |
|          | 0.13       | -0.07      | -0.71 | -0.94 | -0.59 | -0.71 | -1.28 | -0.66 | -0.41 | -0.2  | -0.32 | 0.13  |       |   |
| GENE641X | 18626_at   | 18626_at   | 1     | -0.49 | -1.15 | -1.73 | -1.08 | -1.55 | -0.81 | -     |       |       |       |   |
|          | 0.83       | -0.97      | -0.34 | -0.37 | -0.21 | -0.15 | -0.18 | -0.12 | -0.51 | -0.08 | -0.37 | -0.37 | -0.35 | - |
|          | 0.39       | -0.1       | -0.05 | -0.68 | -0.68 | -0.41 | -1.64 | -0.73 | 0.01  | 0.01  | -0.53 | -0.13 |       |   |
| GENE640X | 13884_at   | 13884_at   | 1     | -0.81 | -0.94 | -1.43 | -1.12 | -1.64 | -1    | -     |       |       |       |   |
|          | 1.21       | -0.88      | -0.41 | -0.53 | -0.04 | -0.34 | -0.08 | -0.13 | -1.05 | 0.16  | -0.12 | -0.08 | -0.45 | - |
|          | 0.37       | -0.62      | -0.04 | -0.66 | -0.47 | -0.35 | -0.91 | -0.51 | -0.23 | -0.18 | -0.91 | -0.35 |       |   |
| GENE567X | 16608_s_at | 16608_s_at | 1     | -0.45 | -0.3  | -0.94 | -0.66 | -1.12 | -0.91 | -     |       |       |       |   |
|          | 0.13       | -0.3       | -0.41 | -0.21 | -0.12 | 0.01  | -0.02 | -0.32 | -0.41 | -0.07 | -0.04 | -0.3  | -0.43 | - |
|          | 0.07       | -0.23      | -0.64 | -0.32 | -0.3  | -0.49 | -0.43 | 0.02  | -0.07 | 0.11  | -0.35 | 0.11  |       |   |
| GENE491X | 15987_at   | 15987_at   | 1     | -1.18 | -0.53 | -1.64 | -0.83 | -1    | -1.18 | -     |       |       |       |   |
|          | 1.08       | -0.66      | -0.13 | 0.07  | -0.05 | -0.07 | 0     | 0.05  | -0.21 | -0.3  | -0.39 | -0.13 | -0.78 | - |
|          | 0.43       | -0.35      | -1.43 | -0.51 | -0.32 | -0.15 | -0.83 | -0.3  | -0.2  | -0.08 | -0.35 | -0.04 |       |   |
| GENE940X | 20437_at   | 20437_at   | 1     | -0.62 | -0.45 | -6.64 | -5.05 | -2.12 | -1.28 | -1    |       |       |       |   |
|          |            | -1.32      | -1    | -0.41 | -0.88 | -0.78 | -1    | -0.39 | -1.73 | -0.91 | -0.81 | -1.12 | -1.39 | - |
|          | 0.76       | -3.32      | -1.43 | -0.97 | -0.94 | 0.13  | -1.15 | 0.04  | 0.29  | 0.22  | -0.32 | -0.25 |       |   |

|           |            |            |       |       |       |       |       |       |       |       |       |       |   |
|-----------|------------|------------|-------|-------|-------|-------|-------|-------|-------|-------|-------|-------|---|
| GENE520X  | 12968_at   | 12968_at   | 1     | -1.55 | -2.25 | -3.05 | -4.05 | -1.88 | -0.35 | -     |       |       |   |
| 1.55      | -0.97      | -0.59      | -0.45 | -0.62 | -0.55 | -0.34 | 0.11  | -1.25 | -0.97 | -1.08 | -1.12 | -1.43 | - |
| 0.76      | -1.18      | -0.16      | -1.21 | -0.78 | -0.49 | 0.02  | -1.59 | 0.02  | 0.52  | -0.97 | -0.73 | -     | - |
| GENE389X  | 16540_s_at | 16540_s_at | 1     | -0.34 | -0.73 | -1.28 | -1.35 | -1.21 | -0.73 | -     | -     | -     | - |
| 0.49      | -0.2       | -0.25      | -0.55 | -0.3  | -0.39 | -0.23 | -0.3  | -0.73 | -0.04 | 0.21  | -0.49 | -0.81 | - |
| 0.26      | -0.43      | -0.57      | -0.39 | -0.28 | 0     | -0.53 | -0.43 | -0.2  | -0.25 | -0.21 | -0.02 | -     | - |
| GENE388X  | 19632_at   | 19632_at   | 1     | -1.05 | -1.05 | -1.47 | -2.73 | -1.35 | -0.91 | -     | -     | -     | - |
| 0.78      | -0.78      | -0.15      | -1.12 | -0.51 | -0.51 | -0.25 | -0.53 | -1.25 | 0.33  | 0.5   | -0.71 | -1    | - |
| 0.57      | -0.71      | -0.66      | -0.71 | -0.16 | -0.2  | -0.59 | -0.41 | 0.09  | 0.18  | -0.51 | -0.3  | -     | - |
| GENE387X  | 19215_at   | 19215_at   | 1     | -1.28 | -2.47 | -3.47 | -3.47 | -1.32 | -1.59 | -     | -     | -     | - |
| 0.43      | -1.18      | -0.3       | -2.39 | -0.78 | -1.35 | -1.08 | -0.78 | -2.18 | -0.23 | 0.08  | -0.81 | -2.12 | - |
| 0.86      | -1.83      | -0.81      | -0.66 | -0.73 | -0.18 | -0.68 | -1.73 | -0.78 | -0.68 | 0.04  | -0.15 | -     | - |
| GENE622X  | 19947_at   | 19947_at   | 1     | -1.21 | -0.97 | -1.88 | -2.55 | -1.59 | -1.25 | -     | -     | -     | - |
| 1.05      | -0.47      | 0.01       | 0.01  | -0.1  | -0.21 | -0.41 | 0.28  | -0.81 | 0.05  | 0.23  | -0.55 | -1.32 | - |
| 0.68      | -0.97      | -0.51      | -1.05 | -0.78 | -0.15 | -0.86 | -1.12 | -0.08 | 0.02  | -0.21 | 0.08  | -     | - |
| GENE547X  | 18942_at   | 18942_at   | 1     | -0.94 | -0.73 | -1.51 | -1.94 | -1.15 | -0.51 | -     | -     | -     | - |
| 0.51      | -0.23      | -0.02      | -0.66 | -0.28 | 0.01  | 0.13  | -0.12 | -0.71 | 0.12  | 0.49  | -0.43 | -1.21 | - |
| 0.68      | -0.94      | -0.28      | -0.73 | -0.64 | -0.43 | -0.73 | 0     | 0.32  | 0.44  | -0.3  | 0     | -     | - |
| GENE548X  | 20401_at   | 20401_at   | 1     | -0.68 | -1.21 | -1.18 | -2    | -1.08 | -0.73 | -     | -     | -     | - |
| 0.08      | -0.43      | -0.28      | -0.78 | 0.2   | -0.73 | -0.59 | 0.2   | -1.12 | 0.59  | 0.31  | -0.16 | -1.18 | - |
| 0.66      | -1.02      | -0.51      | -1.32 | -0.81 | -0.21 | -0.97 | -0.55 | 0.35  | -0.25 | -0.62 | -0.02 | -     | - |
| GENE546X  | 14926_g_at | 14926_g_at | 1     | -0.32 | -0.62 | -0.94 | -1.51 | -1.15 | -0.68 | -     | -     | -     | - |
| 0.18      | -0.15      | -0.3       | -0.39 | -0.55 | -0.43 | -0.26 | 0.61  | -0.47 | 0.08  | 0.26  | -0.45 | -     | - |
| 0.34      | -0.32      | -0.59      | -0.18 | -0.59 | -0.41 | -0.37 | -0.39 | -0.15 | 0.05  | 0.18  | -0.25 | -0.35 | - |
| GENE514X  | 16145_at   | 16145_at   | 1     | -0.47 | -0.62 | -0.62 | -0.66 | -1.02 | -0.62 | -     | -     | -     | - |
| 0.18      | -0.34      | -0.12      | 0.28  | -0.05 | -0.2  | -0.23 | 0.09  | -0.12 | -0.08 | 0.01  | 0.02  | -0.35 | - |
| 0.59      | -0.49      | -0.43      | -0.51 | -0.39 | -0.18 | -0.35 | 0.09  | 0.01  | -0.02 | -0.13 | 0.05  | -     | - |
| GENE513X  | 19910_at   | 19910_at   | 1     | -1.51 | -1.55 | -1    | -2.64 | -1.02 | -1.78 | -     | -     | -     | - |
| 0.21      | -0.45      | -0.34      | -0.37 | -0.37 | -0.68 | -0.43 | 0.28  | -0.97 | 0.11  | -0.43 | -0.39 | -1.25 | - |
| 1.12      | -1.43      | -1.15      | -1.43 | -1.32 | -0.94 | -0.88 | -0.13 | -0.02 | -0.13 | -0.32 | -0.47 | -     | - |
| GENE512X  | 12609_at   | 12609_at   | 1     | -5.64 | -3.64 | -2.94 | -5.64 | -4.64 | -4.64 | -     | -     | -     | - |
| 0.26      | -0.26      | -0.78      | -1.55 | -0.55 | -2.39 | -2.64 | -0.26 | -1.69 | 0.31  | 0.05  | -1.05 | -1.94 | - |
| 2.55      | -2.94      | -4.64      | -5.05 | -5.05 | -1.35 | -2.05 | -0.62 | 0.46  | 0.45  | 0.52  | 0.72  | -     | - |
| GENE536X  | 13218_s_at | 13218_s_at | 1     | -0.59 | -0.43 | -1.39 | -1.83 | -1.32 | -1.18 | -     | -     | -     | - |
| 0.53      | -0.23      | -0.18      | -0.35 | -0.55 | -0.45 | -0.47 | -0.23 | -0.97 | -0.05 | 0.18  | -1.08 | -0.53 | - |
| 1.15      | -0.62      | -0.47      | -1.08 | -1.18 | -0.71 | -0.49 | 0.26  | 0.09  | 0.13  | -0.18 | -0.21 | -     | - |
| GENE535X  | 17973_s_at | 17973_s_at | 1     | -1.59 | -0.26 | -1.39 | -2.83 | -2.05 | -1.94 | -     | -     | -     | - |
| 1.18      | -0.62      | -0.76      | -0.26 | -0.59 | -0.34 | -0.55 | -0.3  | -0.86 | -0.15 | -0.37 | -0.83 | -1.15 | - |
| 0.83      | -1.15      | -1.55      | -1.25 | -0.94 | -0.94 | -0.78 | 0.12  | -0.21 | -0.12 | -0.04 | 0.05  | -     | - |
| GENE534X  | 16164_s_at | 16164_s_at | 1     | -1.94 | -0.12 | -2.55 | -2.64 | -2.55 | -2.73 | -     | -     | -     | - |
| 1.69      | -1.15      | -1         | -1.28 | -0.97 | -0.71 | -0.71 | -0.94 | -1.64 | 0.04  | -0.08 | -1    | -1.12 | - |
| 1.02      | -1         | -1.55      | -1.18 | -1.21 | -0.97 | -1.15 | -0.16 | -0.12 | 0.07  | -0.15 | -0.12 | -     | - |
| GENE1160X | 14505_at   | 14505_at   | 1     | -2    | -0.66 | -2.94 | -2.94 | -3.05 | -2.83 | -     | -     | -     | - |
| 1.69      | -1.94      | -1.05      | -1.28 | -0.81 | -1.05 | -2.73 | -1.08 | -2.18 | -0.55 | -1.12 | -0.97 | -1.32 | - |
| 1.25      | -1.05      | -1.69      | -1.73 | -2.64 | -2.83 | -1.15 | 0.26  | -0.21 | 0.11  | -0.49 | -0.13 | -     | - |
| GENE533X  | 13655_at   | 13655_at   | 1     | -0.88 | -0.71 | -1.73 | -2    | -1.47 | -1.02 | -     | -     | -     | - |
| 0.62      | -0.86      | -0.26      | -0.45 | -0.39 | -0.16 | -0.26 | -0.37 | -0.91 | -0.2  | -0.23 | -0.53 | -0.76 | - |
| 0.64      | -0.97      | -0.68      | -1.39 | -1.47 | -0.83 | -0.94 | -0.18 | -0.2  | -0.05 | -0.43 | -0.13 | -     | - |
| GENE532X  | 15066_at   | 15066_at   | 1     | -1.43 | -1    | -1.78 | -2.64 | -1.78 | -1.28 | -     | -     | -     | - |
| 0.81      | -1.28      | -0.45      | -0.88 | -0.68 | -0.62 | -0.39 | -0.78 | -1.32 | -0.21 | -0.3  | -0.59 | -1.12 | - |
| 0.41      | -1.05      | -0.81      | -1.51 | -1.47 | -0.68 | -0.68 | -0.64 | -0.3  | -0.21 | -0.23 | 0.01  | -     | - |
| GENE531X  | 18798_at   | 18798_at   | 1     | -1.83 | -1.59 | -2.94 | -3.18 | -1.83 | -2.32 | -     | -     | -     | - |
| 1.05      | -1.12      | -0.51      | -1.25 | -0.88 | -1.51 | -1.32 | -0.55 | -1.55 | -0.57 | -0.26 | -1.02 | -1.47 | - |
| 1.32      | -1.78      | -1.43      | -2    | -1.94 | -1.32 | -0.91 | -0.32 | -0.2  | -0.1  | 0.18  | -0.3  | -     | - |
| GENE530X  | 16501_s_at | 16501_s_at | 1     | -2.25 | -1.64 | -2.05 | -2.83 | -2.05 | -2.47 | -     | -     | -     | - |
| 0.94      | -1.78      | -0.53      | -1.05 | -1    | -0.91 | -0.91 | -1.55 | -1.55 | -0.51 | -0.32 | -0.97 | -1.51 | - |
| 1.15      | -1.55      | -1.64      | -2.32 | -2.18 | -1.69 | -0.78 | 0.05  | -0.2  | -0.25 | -0.35 | -0.35 | -     | - |



|          |            |            |       |       |       |       |       |       |       |       |       |       |       |   |
|----------|------------|------------|-------|-------|-------|-------|-------|-------|-------|-------|-------|-------|-------|---|
| GENE220X | 15783_s_at | 15783_s_at | 1     | -1.35 | -0.55 | -1.69 | -1.32 | -1.25 | -1.25 | -     |       |       |       |   |
|          | 1.08       | -1.18      | -0.3  | -0.71 | -0.21 | -0.43 | -0.43 | -0.57 | -1.08 | -0.12 | 0.05  | -0.39 | -0.57 | - |
|          | 0.25       | -0.81      | -0.62 | -1.39 | -1.12 | -0.81 | -0.57 | 0.01  | -0.2  | 0.05  | -0.02 | 0.16  | -     |   |
| GENE219X | 17701_at   | 17701_at   | 1     | -1.94 | -1.39 | -1.88 | -2.18 | -1.83 | -1.83 | -     |       |       |       |   |
|          | 1.78       | -1.18      | -0.32 | -0.34 | -0.26 | -0.41 | -0.51 | -0.64 | -1.18 | 0.13  | 0.05  | -0.64 | -0.97 | - |
|          | 0.59       | -1.02      | -1    | -1.83 | -1.83 | -1.21 | -1.21 | -0.32 | -0.15 | 0.01  | 0.02  | -0.32 | -     |   |
| GENE218X | 19789_at   | 19789_at   | 1     | -4.05 | -2    | -3.64 | -5.05 | -4.05 | -3.05 | -     |       |       |       |   |
|          | 2.39       | -2.39      | -1.21 | -1.59 | -0.66 | -1    | -1.08 | -1.12 | -2.94 | -0.53 | 0.05  | -1.08 | -1.47 | - |
|          | 2.83       | -2.83      | -1.78 | -4.64 | -4.64 | -2.18 | -0.94 | 0.55  | 0.07  | 0.16  | -0.43 | 0.33  | -     |   |
| GENE994X | 15989_at   | 15989_at   | 1     | -0.88 | -0.45 | -0.41 | -0.34 | -0.1  | -1.08 | -     |       |       |       |   |
|          | 0.37       | -1.15      | 0.32  | 0.28  | -0.1  | -0.04 | -0.12 | 0.37  | -0.15 | -0.18 | -0.23 | -0.28 | -0.66 | - |
|          | 0.32       | -0.39      | -0.34 | -0.32 | -0.07 | 0.05  | -0.18 | 0.15  | -0.18 | -0.1  | -0.05 | 0.04  | -     |   |
| GENE717X | 20555_s_at | 20555_s_at | 1     | -1.05 | -0.41 | -0.71 | -0.37 | -0.05 | -1.28 | -     |       |       |       |   |
|          | 0.22       | -0.91      | 0.25  | -0.16 | 0.22  | 0.05  | 0     | 0.21  | -0.91 | -0.23 | -0.25 | -0.08 | -     |   |
|          | 0.73       | -1.28      | -1.32 | -0.37 | -1.21 | -0.94 | -0.21 | -0.12 | -0.55 | -0.15 | -0.12 | -0.26 | -0.35 | - |
| GENE716X | 17419_at   | 17419_at   | 1     | -0.68 | -1.15 | -1.32 | -1.32 | 0.01  | -0.59 | -     |       |       |       |   |
|          | 0.32       | -1.25      | 0.13  | 0.2   | 0.72  | -0.13 | 0.17  | 0.07  | -0.02 | 0.44  | -0.12 | 0.34  | -0.91 | - |
|          | 1.43       | -1.39      | -0.73 | -1.39 | -0.94 | -0.55 | -1.28 | -0.53 | -0.49 | -0.53 | -0.53 | -0.25 | -     |   |
| GENE715X | 13084_at   | 13084_at   | 1     | -1.59 | -0.78 | -0.94 | -0.86 | -0.39 | -0.83 | -     |       |       |       |   |
|          | 1.18       | -1.08      | 0.38  | 0.56  | 0.63  | -0.01 | -0.26 | -0.37 | 0.12  | 0.04  | -0.26 | 0.07  | -0.94 | - |
|          | 1.35       | -1.73      | -0.05 | -0.83 | -0.81 | -0.23 | -0.37 | -1.02 | -0.59 | -0.37 | -0.35 | -0.21 | -     |   |
| GENE714X | 13382_at   | 13382_at   | 1     | -1.39 | -0.76 | -0.47 | -0.76 | -0.55 | -1.25 | -     |       |       |       |   |
|          | 0.66       | -0.68      | 0     | -0.21 | 0.5   | 0.02  | -0.28 | -0.34 | 0.07  | 0     | -0.05 | 0.07  | -0.64 | - |
|          | 0.71       | -1.18      | -0.45 | -1    | -0.66 | -0.21 | -0.62 | -0.73 | -0.51 | -0.47 | -0.28 | -0.3  | -     |   |
| GENE702X | 15237_at   | 15237_at   | 1     | -1.35 | -0.57 | -0.68 | -1.59 | -0.2  | -0.73 | -     |       |       |       |   |
|          | 0.97       | -0.86      | 0.72  | -0.16 | 0.11  | -0.26 | -0.15 | -0.1  | -0.68 | 0.18  | 0.48  | -0.13 | -0.88 | - |
|          | 1.18       | -1.73      | 0.64  | -1.08 | -0.51 | -0.13 | 0.31  | -0.78 | -0.43 | -0.39 | -0.59 | -0.37 | -     |   |
| GENE701X | 15446_at   | 15446_at   | 1     | -0.97 | -0.39 | -0.68 | -0.76 | -0.23 | -0.66 | -     |       |       |       |   |
|          | 1.02       | -0.88      | 0.01  | -0.1  | -0.05 | -0.32 | -0.39 | -0.51 | -0.37 | -0.15 | 0.26  | -0.62 | -0.66 | - |
|          | 0.53       | -0.88      | 0.02  | -1.05 | -0.51 | -0.37 | 0.05  | -0.39 | -0.21 | -0.05 | -0.15 | -0.26 | -     |   |
| GENE689X | 12984_at   | 12984_at   | 1     | -2.55 | -1.35 | -2.94 | -2    | -1.94 | -1.55 | -     |       |       |       |   |
|          | 2.18       | -1.69      | -0.73 | -0.21 | 0.02  | -0.66 | -0.15 | -1.47 | -1.64 | 0.26  | 0.26  | -0.71 | -1.88 | - |
|          | 1.88       | -3.47      | -0.45 | -2    | -0.68 | -0.41 | 0     | -0.55 | -0.25 | 0.2   | 0.15  | -0.18 | -     |   |
| GENE698X | 16482_s_at | 16482_s_at | 1     | -1.39 | -0.57 | -0.1  | -1    | -0.81 | -1.32 | -     |       |       |       |   |
|          | 0.02       | -0.51      | 0.02  | 0     | 0.02  | -0.59 | -0.41 | -0.25 | -0.41 | -0.53 | 0.31  | -0.16 | -     |   |
|          | 0.51       | -0.73      | -0.94 | 0.08  | -0.91 | -0.64 | -0.23 | 0.15  | -0.39 | -0.12 | -0.12 | -0.26 | -0.21 | - |
| GENE697X | 17433_at   | 17433_at   | 1     | -2.25 | -0.49 | -0.39 | -1.51 | -1.15 | -1.32 | -     |       |       |       |   |
|          | 0.66       | -0.68      | -0.1  | -0.49 | -0.34 | -0.68 | -0.49 | -0.88 | -0.94 | -0.64 | -0.49 | -0.53 | -0.83 | - |
|          | 1.39       | -1.47      | 0.16  | -1    | -1.05 | -0.71 | -0.25 | -0.81 | 0.16  | 0.15  | -1.15 | -1.28 | -     |   |
| GENE696X | 12213_at   | 12213_at   | 1     | -1.15 | -0.71 | -0.86 | -0.55 | -0.43 | -1.32 | -     |       |       |       |   |
|          | 0.23       | -0.66      | 0.17  | -0.35 | -0.16 | -0.68 | -0.26 | 0.04  | -0.71 | 0.2   | 0.27  | -0.37 | -0.76 | - |
|          | 0.94       | -1.43      | -0.62 | -0.55 | -0.53 | -0.12 | 0.09  | -0.39 | -0.37 | -0.41 | -0.21 | -0.35 | -     |   |
| GENE695X | 15607_s_at | 15607_s_at | 1     | -1.64 | -1.25 | -1.15 | -1.35 | -1.51 | -2.47 | -1    |       |       |       |   |
|          | -1.39      | -0.35      | -0.37 | -0.41 | -0.05 | -0.04 | -0.32 | -0.64 | -0.13 | -0.07 | -0.55 | -1.39 | -     |   |
|          | 1.47       | -1.69      | -1.39 | -1.08 | -0.73 | -0.18 | -0.3  | -0.59 | -0.35 | -0.41 | -0.43 | -0.39 | -     |   |
| GENE694X | 15549_at   | 15549_at   | 1     | -1.05 | -0.59 | -0.37 | -1    | -1.25 | -1.39 | -     |       |       |       |   |
|          | 0.55       | -0.76      | -0.47 | -0.47 | -0.13 | -0.55 | -0.32 | -0.55 | -0.76 | 0.67  | 0.52  | -0.04 | -0.51 | - |
|          | 1.02       | -0.94      | -0.51 | -0.88 | -1.21 | -0.68 | -0.32 | -0.49 | -0.04 | -0.66 | -0.15 | -0.07 | -     |   |
| GENE693X | 18877_at   | 18877_at   | 1     | -0.66 | -1.94 | -0.76 | -1.73 | -0.15 | -1.39 | -     |       |       |       |   |
|          | 1.02       | -1         | -0.07 | 0.18  | -0.05 | -0.81 | -0.47 | -0.88 | -0.12 | -0.37 | 0.08  | -0.32 | -0.81 | - |
|          | 1.32       | -1.32      | 0     | -0.73 | -0.57 | -0.21 | 0.41  | -0.35 | 0     | 0.07  | 0.12  | -0.41 | -     |   |
| GENE692X | 12560_at   | 12560_at   | 1     | -1    | -1.35 | -0.51 | -1.05 | -0.76 | -1.12 | -     |       |       |       |   |
|          | 0.88       | -1.08      | -0.32 | -0.26 | 0.11  | -0.62 | -0.45 | -0.68 | -0.28 | 0.01  | -0.47 | 0.04  | -0.49 | - |
|          | 0.71       | -1.02      | -0.28 | -1.35 | -0.81 | -0.49 | 0.15  | -0.57 | 0.01  | -0.13 | -0.04 | -0.28 | -     |   |
| GENE691X | 15529_at   | 15529_at   | 1     | -0.94 | -1.43 | -0.43 | -1.32 | -1    | -0.97 | -     |       |       |       |   |
|          | 1.02       | -0.68      | -0.43 | -0.2  | -0.21 | -0.59 | -1    | -0.73 | -0.28 | -0.37 | -0.04 | -0.37 | -0.68 | - |
|          | 0.91       | -1.39      | -0.88 | -0.81 | -0.66 | -0.62 | 0.12  | -0.15 | -0.15 | -0.41 | 0.12  | -0.53 | -     |   |

|          |            |            |       |       |       |       |       |       |       |       |       |       |   |
|----------|------------|------------|-------|-------|-------|-------|-------|-------|-------|-------|-------|-------|---|
| GENE728X | 15270_at   | 15270_at   | 1     | -0.55 | -0.94 | -0.73 | -1.05 | -0.16 | -0.37 | -     |       |       |   |
| 1.94     | -0.59      | 0.74       | 0.5   | -0.28 | 0.09  | -0.2  | -0.02 | -0.12 | -0.15 | -0.1  | -0.49 | -0.37 | - |
| 0.71     | -1.08      | 0.38       | -0.86 | -0.18 | -0.02 | 0.6   | -0.39 | -0.26 | -0.43 | 0     | -0.32 |       |   |
| GENE687X | 13518_at   | 13518_at   | 1     | -1.43 | -0.32 | -0.57 | -1.78 | -0.97 | -0.91 | -     |       |       |   |
| 1.08     | -1.25      | 0.04       | 0.33  | 0.43  | 0.38  | 0.23  | 0.05  | 0.09  | 0.46  | 0.07  | -0.2  | -1.12 | - |
| 0.49     | -1.15      | -0.41      | -0.83 | -0.25 | -0.21 | -0.88 | -1.15 | -0.41 | -0.05 | -0.94 | -0.86 |       |   |
| GENE686X | 19356_at   | 19356_at   | 1     | -1.69 | -0.23 | -0.78 | -1.51 | -0.83 | -0.83 | -     |       |       |   |
| 0.86     | -1.18      | -0.07      | 0.01  | 0.05  | 0.23  | -0.1  | -0.47 | -0.39 | 0.2   | 0.28  | -0.62 | -0.53 | - |
| 0.47     | -0.78      | -0.18      | -0.62 | -0.78 | -0.2  | 0.11  | -0.15 | -0.18 | -0.21 | -0.08 | -0.21 |       |   |
| GENE685X | 15319_at   | 15319_at   | 1     | -2    | -0.51 | -0.49 | -2.55 | -1.35 | -0.62 | -     |       |       |   |
| 1.59     | -1.73      | -0.04      | 0.65  | 0.32  | 0.48  | -0.04 | -0.81 | 0     | 0.41  | 0.25  | 0.04  | -0.83 | - |
| 0.41     | -0.97      | -0.16      | -1.32 | -0.76 | -0.32 | -0.71 | -0.21 | 0.07  | 0.07  | -0.05 | -0.05 |       |   |
| GENE684X | 18549_s_at | 18549_s_at | 1     | -1.21 | -0.64 | -0.62 | -1.25 | -0.78 | -0.86 | -     |       |       |   |
| 0.86     | -1.15      | -0.57      | -0.12 | -0.34 | 0.43  | 0.17  | -0.59 | 0.37  | -0.34 | -0.12 | -0.66 | -0.62 |   |
|          | 0.22       | -0.51      | -0.28 | -0.73 | -0.41 | -0.1  | -0.25 | -0.34 | -1    | -0.51 | 0.05  | -0.35 |   |
| GENE683X | 12738_r_at | 12738_r_at | 1     | -1.73 | -0.97 | -1.64 | -2.32 | -1.12 | -0.64 | -     |       |       |   |
| 1.73     | -0.91      | 0.01       | 0.16  | -0.08 | 0.5   | 0.16  | 0.15  | 0.61  | -0.04 | -0.15 | 0.23  | -0.47 | - |
| 0.59     | -1.18      | -0.41      | -0.49 | -0.28 | 0.32  | 0.37  | -0.71 | -0.62 | -0.49 | 0.09  | -0.1  |       |   |
| GENE682X | 12523_at   | 12523_at   | 1     | -2.55 | -1.59 | -1.39 | -2.73 | -1.73 | -2.25 | -     |       |       |   |
| 1.88     | -1.64      | -0.07      | 0.47  | -0.04 | -0.15 | -0.21 | 0.38  | 0.08  | -0.37 | -0.68 | -0.88 | -1.35 | - |
| 0.97     | -2.18      | -0.53      | -0.23 | 0.34  | 0.54  | 0.22  | -1.73 | -0.62 | -1.02 | 0.55  | -0.57 |       |   |
| GENE681X | 16965_at   | 16965_at   | 1     | -2.32 | -0.35 | -0.64 | -2.32 | -1.47 | -1.18 | -     |       |       |   |
| 1.32     | -1.32      | -0.35      | -0.08 | -0.71 | 0.6   | 1     | -0.97 | -0.08 | -0.78 | -0.78 | -0.45 | -0.13 | - |
| 1.55     | -1.05      | -0.04      | -0.64 | -0.97 | -0.64 | -0.08 | -2    | -0.37 | -0.59 | -0.53 | -0.73 |       |   |
| GENE934X | 20162_s_at | 20162_s_at | 1     | -0.08 | -1.05 | -1.51 | -1.83 | -0.51 | -0.55 | -     |       |       |   |
| 1.59     | -0.83      | 0.09       | -0.26 | -0.53 | -0.47 | -0.43 | -0.57 | -0.55 | 0.01  | -0.41 | -0.66 | -0.78 | - |
| 0.08     | -0.34      | -0.47      | 0     | 0.27  | 0.43  | -0.43 | -0.91 | -0.18 | 0.18  | 0.7   | 0.16  |       |   |
| GENE902X | 18072_at   | 18072_at   | 1     | -0.71 | -1.15 | -1.43 | -1.32 | -0.64 | -0.39 | -     |       |       |   |
| 1.02     | -0.45      | 0.13       | -0.32 | -0.45 | -0.43 | -0.45 | 0.22  | -0.37 | -0.08 | 0.13  | -0.43 | -0.49 | - |
| 0.2      | -0.47      | -0.07      | 0.05  | 0.34  | 0.42  | -0.08 | -0.1  | -0.1  | -0.23 | 0.07  | -0.21 |       |   |
| GENE869X | 18078_at   | 18078_at   | 1     | -0.53 | -0.94 | -0.71 | -1.05 | -0.76 | -0.64 | -     |       |       |   |
| 1.32     | -0.78      | -0.23      | -0.02 | -0.37 | -0.26 | -0.23 | -0.32 | -0.1  | -0.1  | -0.08 | -0.35 | -0.3  | - |
| 0.2      | -0.34      | -0.26      | -0.07 | 0.09  | 0.23  | 0.09  | -0.04 | -0.21 | -0.25 | 0.25  | 0.13  |       |   |
| GENE867X | 20054_at   | 20054_at   | 1     | -1.88 | -2.12 | -2.18 | -3.64 | -1.88 | -1.15 | -     |       |       |   |
| 3.64     | -1.39      | 0.08       | -0.57 | -0.66 | -0.73 | -1    | -0.94 | -0.97 | -0.26 | -0.83 | -0.94 | -1.12 | - |
| 0.81     | -1.12      | -0.71      | -0.45 | -0.16 | -0.07 | -0.2  | -0.45 | -0.15 | -0.3  | -0.07 | -0.07 |       |   |
| GENE896X | 15949_s_at | 15949_s_at | 1     | -0.57 | -1.25 | -2.05 | -1.47 | -1.25 | -0.88 | -     |       |       |   |
| 1.39     | -1         | -0.08      | -0.26 | -0.39 | -0.47 | -0.37 | -0.28 | -0.43 | -0.25 | -0.04 | -0.51 | -0.45 | 0 |
|          | -0.26      | -0.37      | 0.05  | 0.47  | 0.52  | -0.02 | 0.05  | -0.16 | -0.04 | 0.21  | 0.26  |       |   |
| GENE899X | 16044_s_at | 16044_s_at | 1     | -0.21 | -0.97 | -1.15 | -1.12 | -1.05 | -0.71 | -     |       |       |   |
| 1.18     | -0.94      | -0.2       | -0.05 | -0.43 | -0.28 | -0.32 | -0.28 | -0.34 | -0.15 | 0.17  | -0.51 | -0.39 |   |
|          | 0.09       | -0.3       | -0.35 | -0.13 | 0.18  | 0.15  | 0     | 0.2   | -0.12 | -0.05 | 0.26  | 0.13  |   |
| GENE898X | 14684_s_at | 14684_s_at | 1     | -0.23 | -1.12 | -1.35 | -1.21 | -1.15 | -0.78 | -     |       |       |   |
| 1.15     | -0.88      | -0.08      | -0.15 | -0.37 | -0.32 | -0.37 | -0.18 | -0.37 | -0.02 | 0.17  | -0.51 | -0.51 | - |
| 0.07     | -0.39      | -0.47      | -0.15 | 0.09  | 0.17  | -0.16 | 0.02  | -0.16 | 0.01  | 0.2   | 0.15  |       |   |
| GENE897X | 18090_s_at | 18090_s_at | 1     | -0.2  | -1.32 | -1.69 | -1.43 | -1.39 | -0.86 | -     |       |       |   |
| 1.73     | -1.05      | -0.15      | -0.02 | -0.35 | -0.41 | -0.37 | -0.23 | -0.35 | -0.08 | 0.15  | -0.47 | -0.49 | - |
| 0.01     | -0.25      | -0.49      | -0.12 | 0.26  | 0.28  | -0.15 | 0.07  | -0.08 | 0     | 0.12  | 0.15  |       |   |
| GENE895X | 16417_s_at | 16417_s_at | 1     | -0.51 | -0.97 | -1.21 | -1.05 | -1.08 | -0.81 | -     |       |       |   |
| 1.32     | -0.91      | -0.23      | 0.01  | -0.32 | -0.37 | -0.39 | -0.04 | -0.35 | -0.15 | 0.23  | -0.49 | -0.37 | 0 |
|          | -0.12      | -0.35      | 0.08  | 0.28  | 0.35  | -0.1  | 0.36  | -0.02 | 0.04  | 0.21  | 0.2   |       |   |
| GENE894X | 18079_g_at | 18079_g_at | 1     | -0.41 | -0.94 | -1.08 | -1.12 | -1.15 | -0.88 | -     |       |       |   |
| 1.15     | -0.78      | -0.3       | -0.01 | -0.43 | -0.32 | -0.37 | -0.16 | -0.25 | -0.07 | 0.12  | -0.45 | -0.35 | - |
| 0.23     | -0.2       | -0.43      | 0.07  | 0.29  | 0.32  | -0.01 | 0.25  | -0.07 | -0.04 | 0.22  | 0.08  |       |   |
| GENE893X | 18084_s_at | 18084_s_at | 1     | -0.15 | -1    | -1.32 | -1.08 | -1.28 | -0.88 | -     |       |       |   |
| 1.21     | -0.68      | -0.26      | -0.07 | -0.34 | -0.41 | -0.37 | 0.07  | -0.34 | -0.02 | 0.33  | -0.35 | -0.43 | - |
| 0.16     | -0.25      | -0.39      | -0.08 | 0.21  | 0.17  | -0.1  | 0.26  | 0.01  | -0.04 | 0.29  | 0.16  |       |   |



|          |            |            |       |       |       |       |       |       |       |       |       |       |   |
|----------|------------|------------|-------|-------|-------|-------|-------|-------|-------|-------|-------|-------|---|
| GENE904X | 15194_s_at | 15194_s_at | 1     | -1.28 | 0.05  | -1.21 | -1    | -1.78 | -0.73 | -     |       |       |   |
| 1.78     | -0.47      | 0.21       | 0.18  | -0.05 | -0.43 | -0.71 | -0.04 | -0.45 | -0.05 | -0.18 | -1    | -0.66 | - |
| 0.37     | -0.25      | -0.34      | -0.25 | -0.23 | -0.02 | -0.25 | -0.45 | -0.39 | -0.28 | 0.58  | 0.46  |       |   |
| GENE903X | 15160_s_at | 15160_s_at | 1     | -1.83 | -2.05 | -3.32 | -5.64 | -3.83 | -2.55 | -     |       |       |   |
| 2.94     | -1.47      | -0.66      | -0.66 | -2.18 | -1.88 | -2.32 | -1.83 | -1.12 | -0.57 | -0.2  | -1.73 | -0.62 | - |
| 0.04     | -1.69      | -2.05      | -1.64 | -0.83 | -0.97 | -1.12 | 0.75  | -0.13 | -0.68 | 3.15  | 1.91  |       |   |
| GENE851X | 18929_s_at | 18929_s_at | 1     | -2.39 | -1.59 | -3.64 | -4.32 | -2.94 | -2.83 | -     |       |       |   |
| 2.32     | -2.39      | -0.39      | -0.12 | -0.81 | -0.55 | -0.68 | -0.78 | -0.12 | 0.5   | 0.43  | -1.05 | -1.18 | - |
| 0.28     | -1.55      | -0.94      | -0.81 | -0.64 | 0.13  | -1.73 | -0.43 | -0.21 | -0.45 | 1.41  | 1.47  |       |   |
| GENE623X | 20474_at   | 20474_at   | 1     | -1.18 | -0.53 | -1.32 | -2.12 | -0.94 | -1.25 | -     |       |       |   |
| 0.64     | -0.88      | -0.26      | -0.12 | -0.15 | 0.09  | -0.1  | -0.2  | -0.35 | 0.31  | 0.36  | -0.37 | -1    | - |
| 0.02     | -0.53      | -0.43      | -0.37 | -0.35 | 0.16  | -0.49 | -0.41 | -0.25 | 0.13  | 0.17  | 0.2   |       |   |
| GENE802X | 14728_s_at | 14728_s_at | 1     | -1.15 | -1.32 | -1.64 | -1.78 | -1.39 | -1.08 | -     |       |       |   |
| 1.47     | -1.51      | 0.01       | -0.12 | -0.02 | -0.05 | -0.16 | -0.55 | -0.37 | 0.17  | 0.16  | -0.23 | -1.02 | - |
| 0.32     | -0.73      | -0.78      | -0.43 | -0.15 | 0.09  | -0.53 | -0.49 | 0     | 0.11  | -0.05 | -0.07 |       |   |
| GENE801X | 12756_s_at | 12756_s_at | 1     | -0.88 | -1.47 | -2    | -1.69 | -1.59 | -1.32 | -     |       |       |   |
| 1.21     | -1.15      | -0.15      | -0.08 | -0.01 | -0.18 | -0.04 | -0.3  | -0.45 | -0.01 | 0.09  | -0.13 | -0.94 | - |
| 0.26     | -0.68      | -1         | -0.05 | 0.13  | 0.34  | -0.51 | -0.47 | -0.07 | 0.09  | 0.07  | -0.02 |       |   |
| GENE279X | 16996_s_at | 16996_s_at | 1     | -1.94 | -2.32 | -2.94 | -2.64 | -2.39 | -3.05 | -     |       |       |   |
| 2.64     | -1.78      | -0.47      | -0.49 | 0.29  | -0.3  | -0.45 | -0.37 | -0.51 | 0.13  | 0.44  | -0.66 | -0.91 | - |
| 0.43     | -1.32      | -1.64      | -1.05 | -1.12 | 0.01  | -1.21 | -1.15 | -0.78 | -0.25 | -0.45 | 0.09  |       |   |
| GENE495X | 13662_at   | 13662_at   | 1     | -0.66 | -0.2  | -1.73 | -0.97 | -1.55 | -1.25 | -     |       |       |   |
| 1.08     | -1         | -0.49      | 0.05  | -0.02 | -0.43 | -0.39 | -0.57 | -0.51 | 0     | 0.17  | 0.08  | -0.86 | - |
| 0.44     | -0.57      | -0.53      | -0.43 | -0.47 | -0.26 | -0.28 | -0.2  | -0.41 | 0.05  | 0.41  | 0.17  |       |   |
| GENE866X | 19365_s_at | 19365_s_at | 1     | -2.05 | -0.73 | -2.55 | -1.59 | -0.86 | -0.91 | -2    |       |       |   |
| 0.28     | -0.59      | -0.12      | -0.76 | -0.35 | -0.15 | -0.28 | 0.38  | -0.18 | 0     | 0.23  | 0.2   |       |   |
| GENE865X | 13577_s_at | 13577_s_at | 1     | -1.55 | -0.83 | -3.05 | -1.78 | -1.25 | -1.12 | -     |       |       |   |
| 2.18     | -1.59      | -0.2       | -0.35 | -0.35 | -0.64 | -0.59 | -0.51 | -0.97 | -0.49 | -1    | -0.62 | -1.55 | - |
| 0.76     | -0.88      | -0.83      | 0     | 0.08  | 0.32  | -0.68 | 0     | -0.13 | -0.02 | -0.08 | -0.02 |       |   |
| GENE901X | 12754_g_at | 12754_g_at | 1     | -0.68 | -0.94 | -1.35 | -1.15 | -0.94 | -0.53 | -     |       |       |   |
| 1.12     | -1.12      | 0.11       | 0.11  | -0.23 | -0.43 | -0.25 | -0.07 | -0.53 | -0.16 | 0     | -0.28 | -0.26 | - |
| 0.07     | -0.18      | -0.12      | -0.13 | 0.35  | 0.17  | 0.04  | 0.43  | 0.08  | 0.12  | 0.21  | 0.18  |       |   |
| GENE900X | 17002_at   | 17002_at   | 1     | -1.83 | -1.47 | -2.47 | -2.18 | -1.39 | -1.43 | -     |       |       |   |
| 1.73     | -1.69      | -0.02      | -0.25 | -0.34 | -0.66 | -0.47 | -0.55 | -1.15 | -0.25 | 0.27  | -0.53 | -0.66 | - |
| 0.05     | -0.51      | -0.08      | -0.08 | 0.22  | 0.27  | 0.09  | 0.17  | -0.01 | 0.08  | 0.27  | 0.15  |       |   |
| GENE858X | 19439_at   | 19439_at   | 1     | -1.59 | -1.51 | -2.12 | -2.25 | -1.73 | -1.02 | -     |       |       |   |
| 1.59     | -1.32      | 0.01       | -0.51 | -0.32 | -0.91 | -0.88 | -0.07 | -0.83 | -0.34 | -0.43 | -0.16 | -1.08 | - |
| 0.2      | -0.41      | -0.49      | -0.59 | -0.28 | 0.18  | -0.62 | 0.22  | 0.18  | 0.25  | 0.05  | 0.29  |       |   |
| GENE857X | 17449_at   | 17449_at   | 1     | -1.78 | -1.88 | -2.83 | -2.39 | -2    | -1.08 | -     |       |       |   |
| 2.12     | -1.39      | 0.09       | -0.23 | -0.15 | -1.12 | -0.91 | -0.35 | -1.18 | -0.62 | -0.57 | -0.39 | -0.68 | - |
| 0.34     | -0.62      | -0.68      | -0.25 | 0.2   | 0.23  | -0.34 | 0.17  | 0.23  | 0.04  | 0.27  | 0.26  |       |   |
| GENE473X | 14916_at   | 14916_at   | 1     | -2.25 | -1.88 | -2.12 | -1.55 | -0.97 | -0.73 | -     |       |       |   |
| 1.55     | -1.55      | 0.2        | -0.55 | -0.02 | -1.08 | -0.78 | -0.39 | -1    | -0.64 | -0.91 | -0.3  | -0.2  | - |
| 0.32     | -0.2       | -0.41      | -0.2  | 0.27  | 0.13  | 0.16  | 0.73  | 0.22  | 0.16  | 0.04  | 0.08  |       |   |
| GENE925X | 17098_s_at | 17098_s_at | 1     | -0.73 | -1.32 | -2.47 | -1.83 | -0.59 | -0.51 | -     |       |       |   |
| 1.94     | -1.35      | 0.11       | -0.37 | -0.2  | 0.18  | -0.05 | -0.39 | -0.37 | 0.47  | 0.35  | -0.41 | -0.71 | - |
| 0.11     | -0.55      | -0.26      | -0.51 | -0.39 | -0.07 | -0.53 | -0.62 | -0.18 | -0.13 | 0.07  | 0.07  |       |   |
| GENE924X | 13563_at   | 13563_at   | 1     | -0.64 | -0.83 | -1.78 | -1.35 | -0.64 | -0.47 | -     |       |       |   |
| 1.05     | -0.91      | -0.04      | -0.15 | 0.13  | -0.12 | -0.07 | -0.26 | -0.55 | -0.02 | 0.02  | 0.02  | -0.47 | - |
| 0.16     | -0.21      | -0.16      | -0.08 | 0     | -0.12 | 0.05  | -0.3  | -0.07 | -0.04 | 0     | -0.02 |       |   |
| GENE923X | 17999_at   | 17999_at   | 1     | -3.47 | -1.88 | -4.64 | -5.05 | -1.39 | -1.05 | -     |       |       |   |
| 3.32     | -4.05      | -0.23      | 0.21  | -0.35 | 0.2   | -0.47 | -2.47 | -0.71 | 0.22  | -0.28 | -0.81 | -1.12 | - |
| 0.28     | -1.18      | -0.07      | -0.49 | -0.41 | 0.04  | -0.51 | -0.21 | 0.35  | 0.55  | 0.01  | -0.2  |       |   |
| GENE856X | 12610_at   | 12610_at   | 1     | -1.88 | -1.51 | -3.64 | -2.39 | -1.78 | -1.73 | -     |       |       |   |
| 2.32     | -2.12      | -0.2       | -0.53 | 0.34  | 0.2   | 0.17  | 0.05  | -0.73 | 0.45  | 0     | -0.32 | -0.66 | - |
| 0.45     | -0.59      | -0.81      | -0.23 | 0.16  | 0.64  | 0.05  | -0.35 | -0.83 | 0.11  | 0.44  | 0.45  |       |   |

|          |            |            |       |       |       |       |       |       |       |       |       |       |       |    |
|----------|------------|------------|-------|-------|-------|-------|-------|-------|-------|-------|-------|-------|-------|----|
| GENE853X | 16068_s_at | 16068_s_at | 1     | -0.81 | -0.97 | -2.18 | -2.12 | -1.28 | -0.81 | -     |       |       |       |    |
|          | 1.32       | -0.97      | -0.34 | -0.37 | 0.13  | -0.51 | -0.21 | -0.04 | -0.68 | 0.12  | 0.42  | -0.23 | -0.57 | -  |
|          | 0.39       | -0.57      | -0.26 | -0.41 | -0.12 | -0.01 | -0.08 | -0.01 | 0.41  | 0.26  | 0.09  | 0.05  |       |    |
| GENE852X | 18829_at   | 18829_at   | 1     | -1.02 | -1.43 | -2.94 | -2.55 | -1.55 | -1    | -     |       |       |       |    |
|          | 1.51       | -1.32      | 0.11  | 0.15  | -0.04 | -0.35 | 0.05  | -0.26 | -0.49 | -0.05 | 0.12  | -0.3  | -0.55 | -  |
|          | 0.32       | -1.12      | -0.83 | -1.25 | -0.91 | -0.25 | -0.26 | -0.2  | -0.05 | 0.25  | 0.12  | 0.4   |       |    |
| GENE913X | 14921_at   | 14921_at   | 1     | -1.25 | -1.32 | -1.32 | -1.73 | -1.35 | -1    | -     |       |       |       |    |
|          | 1.18       | -0.41      | -0.49 | 0     | -0.02 | -0.39 | -0.47 | -0.23 | -0.37 | -0.16 | 0.04  | -0.45 | 0.01  | -  |
|          | 0.81       | -0.41      | -0.51 | -0.43 | -0.25 | 0.05  | -0.02 | 0.08  | -0.16 | 0.04  | 0.04  | 0     |       |    |
| GENE688X | 15835_at   | 15835_at   | 1     | -2.32 | -2.64 | -2.18 | -2.94 | -1.59 | -0.78 | -2    |       |       |       |    |
|          | -1.02      | 0.25       | -0.04 | 0.11  | -1.12 | -1.18 | -0.68 | -0.81 | -0.26 | -0.07 | -0.94 | -0.59 | -     |    |
|          | 1.39       | -2         | 0.07  | -0.83 | -0.51 | 0.41  | 1     | -0.97 | -0.15 | 0.08  | 0.18  | -0.23 |       |    |
| GENE922X | 20210_g_at | 20210_g_at | 1     | -2.25 | -0.88 | -1.83 | -1.59 | -1    | -0.41 | -     |       |       |       |    |
|          | 1.28       | -1.18      | 0.53  | -0.15 | 0.07  | -0.16 | -0.16 | -0.41 | -0.15 | -0.28 | 0.01  | -0.1  | -0.41 |    |
|          | 0.28       | -0.66      | -0.43 | -0.73 | -0.37 | -0.08 | 0.07  | -0.3  | -0.62 | -0.3  | 0.04  | -0.13 |       |    |
| GENE921X | 12178_s_at | 12178_s_at | 1     | -1.39 | -0.81 | -1.18 | -1.64 | -0.78 | -0.81 | -     |       |       |       |    |
|          | 1.35       | -1.43      | 0.18  | 0.16  | -0.04 | 0.05  | 0.04  | -0.43 | 0     | 0.08  | -0.07 | -0.41 | -0.57 | -  |
|          | 0.35       | -0.71      | -0.34 | -0.94 | -0.51 | -0.1  | -0.04 | -0.26 | -0.49 | -0.26 | 0.08  | -0.02 |       |    |
| GENE920X | 12598_at   | 12598_at   | 1     | -2.47 | -1.08 | -2.18 | -2.94 | -1.43 | -1.08 | -     |       |       |       |    |
|          | 1.78       | -1.59      | 0.46  | -0.04 | 0.12  | -0.62 | -0.91 | -0.73 | -0.45 | -0.2  | -0.13 | -0.78 | -0.68 | -  |
|          | 0.88       | -1.15      | -0.62 | -1.25 | -0.66 | -0.45 | -0.21 | -0.53 | 0.04  | 0.02  | 0.77  | 0.28  |       |    |
| GENE928X | 14946_at   | 14946_at   | 1     | -1.55 | -1.83 | -2    | -1.73 | -0.68 | -0.41 | -     |       |       |       |    |
|          | 1.78       | -1.43      | 0.2   | -0.2  | -0.13 | -0.66 | -0.13 | -0.28 | -0.66 | -0.32 | -0.04 | -0.21 | -0.35 | -  |
|          | 0.47       | -0.47      | 0.01  | -0.78 | -0.3  | -0.28 | -0.16 | 0.05  | 0.26  | -0.16 | 0.01  | -0.28 |       |    |
| GENE927X | 16905_s_at | 16905_s_at | 1     | -1.78 | -1.47 | -2.12 | -1.78 | -0.71 | -0.81 | -     |       |       |       |    |
|          | 1.51       | -1.83      | 0.18  | -0.43 | -0.23 | -0.18 | -0.34 | -0.78 | -0.81 | -0.16 | -0.34 | -0.37 | -0.2  | -  |
|          | 0.47       | -0.86      | 0.01  | -0.73 | -0.71 | -0.26 | 0     | -0.04 | -0.28 | -0.25 | 0.05  | 0.11  |       |    |
| GENE926X | 14890_at   | 14890_at   | 1     | -2.83 | -2.64 | -3.05 | -3.18 | -1.32 | -1.47 | -     |       |       |       |    |
|          | 2.47       | -2.64      | 0.17  | -0.2  | -0.07 | -0.3  | -0.16 | -0.68 | -0.62 | 0.29  | 0.18  | -0.07 | -0.62 | -  |
|          | 0.53       | -1         | -0.26 | -1.25 | -1.83 | -0.28 | -0.59 | -0.18 | 0.11  | -0.23 | 0.37  | 0.29  |       |    |
| GENE930X | 13232_s_at | 13232_s_at | 1     | -1.35 | -1.35 | -1.55 | -1.51 | -0.78 | -0.47 | -     |       |       |       |    |
|          | 1.28       | -1.32      | 0.02  | -0.37 | -0.59 | -0.3  | -0.47 | -0.59 | -0.68 | -0.12 | -0.25 | -0.47 | -0.62 | -  |
|          | 0.78       | -0.64      | 0.08  | -0.57 | -0.71 | -0.35 | -0.57 | 0.04  | 0.07  | 0.07  | -0.26 | -0.15 |       |    |
| GENE376X | 15081_at   | 15081_at   | 1     | -1.59 | -0.97 | -2.05 | -2.18 | -0.97 | -0.53 | -     |       |       |       |    |
|          | 1.28       | -1.25      | 0     | -0.91 | -0.23 | -0.32 | -0.25 | -0.59 | -0.83 | 0.07  | 0.04  | -0.34 | -0.86 | -  |
|          | 0.59       | -1         | -0.1  | -1    | -0.86 | -0.41 | -0.66 | -0.55 | -0.2  | -0.02 | -0.62 | -0.16 |       |    |
| GENE375X | 14480_at   | 14480_at   | 1     | -2.12 | -2.32 | -2.94 | -3.83 | -1.78 | -1.28 | -     |       |       |       |    |
|          | 1.59       | -2.18      | -0.39 | -1    | -0.68 | -0.57 | -0.34 | -0.86 | -1.18 | -0.25 | -0.12 | -0.81 | -1.12 | -  |
|          | 1.18       | -1.18      | -0.51 | -1.43 | -1.51 | -0.83 | -0.41 | -0.86 | -0.21 | -0.57 | -0.47 | -0.28 |       |    |
| GENE374X | 15183_s_at | 15183_s_at | 1     | -3.47 | -3.18 | -4.05 | -3.64 | -2.73 | -1.83 | -     |       |       |       |    |
|          | 3.32       | -2.47      | 0.79  | -1.64 | 0     | -0.04 | -0.73 | -1.32 | -2    | 0.26  | -0.62 | -0.18 | -1.78 | -1 |
|          | -1.39      | -0.25      | -1.88 | -2.47 | -0.53 | -1    | -1.02 | -0.18 | 0     | -0.39 | 0     |       |       |    |
| GENE373X | 13292_at   | 13292_at   | 1     | -2.47 | -1.94 | -2.39 | -2.32 | -1.47 | -0.86 | -     |       |       |       |    |
|          | 2.47       | -1.88      | -0.21 | -0.3  | -0.43 | -0.66 | -0.83 | -0.86 | -1.15 | -0.34 | -0.2  | -0.43 | -0.97 | -  |
|          | 0.86       | -1.83      | -0.64 | -1.25 | -1.05 | -0.35 | -0.57 | -0.86 | -0.71 | -0.39 | 0     | -0.05 |       |    |
| GENE918X | 16005_at   | 16005_at   | 1     | -0.91 | -0.97 | -1.08 | -1.25 | -0.83 | -1.18 | -     |       |       |       |    |
|          | 0.68       | -1.64      | -0.15 | -0.23 | -0.08 | -0.66 | -0.55 | -0.43 | -1.15 | -0.21 | -0.13 | -0.3  | -0.53 | -  |
|          | 0.91       | -0.57      | -0.08 | -0.59 | -0.53 | -0.18 | -0.15 | 0.05  | -0.12 | -0.02 | -0.15 | 0.04  |       |    |
| GENE917X | 20638_at   | 20638_at   | 1     | -1.88 | -2.83 | -2    | -2.39 | -1.78 | -2.47 | -     |       |       |       |    |
|          | 1.43       | -2.32      | 0.52  | -0.64 | 0.02  | -1    | -1.39 | -1    | -2.25 | -0.07 | -0.07 | -0.23 | -1.08 | -  |
|          | 0.37       | -0.51      | -0.3  | -0.94 | -1.21 | -0.41 | -0.64 | -0.66 | -0.81 | -0.57 | -0.76 | -0.49 |       |    |
| GENE916X | 19972_at   | 19972_at   | 1     | -0.68 | -0.41 | -1.05 | -1.51 | -0.97 | -0.71 | -     |       |       |       |    |
|          | 0.73       | -1.05      | 0.27  | -0.3  | 0.16  | -0.78 | -0.3  | -0.53 | -0.88 | 0.12  | -0.23 | 0.04  | -0.08 | -  |
|          | 0.23       | -0.39      | 0.17  | -0.35 | -0.3  | 0.02  | 0.11  | 0.21  | 0     | 0.02  | 0     | -0.18 |       |    |
| GENE734X | 17645_s_at | 17645_s_at | 1     | -1.88 | -1.18 | -1.64 | -2.73 | -1.73 | -1.55 | -     |       |       |       |    |
|          | 1.28       | -1.39      | 0.43  | -1.35 | -0.53 | -1.28 | -0.71 | -0.59 | -1.78 | 0.22  | 0.64  | -1.47 | -0.78 | -  |
|          | 0.43       | -1.47      | 0     | -1.18 | -0.81 | -0.53 | -0.3  | 0.08  | -0.13 | -0.49 | 0.83  | 0.62  |       |    |

|          |            |            |       |       |       |       |       |       |       |       |       |       |   |
|----------|------------|------------|-------|-------|-------|-------|-------|-------|-------|-------|-------|-------|---|
| GENE733X | 14679_at   | 14679_at   | 1     | -0.76 | -2.32 | -1.35 | -3.64 | -2.25 | -1.51 | -     |       |       |   |
| 2.12     | -0.73      | 0.21       | -1.25 | 0.26  | -1.55 | -0.86 | -0.12 | -1.39 | -0.12 | 0.12  | -0.62 | -0.86 | - |
| 1.21     | -1.51      | -0.23      | -0.81 | -0.41 | -0.15 | -0.21 | -0.41 | 0.02  | 0.34  | 0.31  | 0.4   |       |   |
| GENE680X | 14993_at   | 14993_at   | 1     | -0.28 | -0.73 | -1.55 | -1.39 | -0.94 | -0.86 | -     |       |       |   |
| 1.35     | -0.88      | 0.36       | -1.15 | 0.15  | -0.39 | -0.04 | -0.59 | -1.05 | 0.79  | 0.93  | 0.02  | -1.08 | - |
| 0.62     | -0.57      | 0.02       | -0.1  | -0.41 | 0     | 0     | -0.23 | 0.32  | 0.09  | 0     | -0.28 |       |   |
| GENE976X | 15022_at   | 15022_at   | 1     | -0.28 | -1.02 | -0.88 | -0.62 | -1.39 | -0.94 | -     |       |       |   |
| 1.69     | -1.35      | -0.1       | 0.41  | 0.32  | -0.47 | -0.28 | -0.78 | -0.04 | 0.07  | 0.23  | 0.23  | 0.23  | 0 |
|          | -0.26      | -0.12      | -0.13 | -0.26 | 0.29  | 0.08  | -0.16 | 0.02  | 0.18  | -0.02 | 0.08  |       |   |
| GENE973X | 18655_at   | 18655_at   | 1     | -0.41 | -0.64 | -0.26 | -0.86 | -1.02 | -0.97 | -     |       |       |   |
| 0.91     | -0.64      | -0.25      | -0.16 | 0.22  | -0.37 | -0.12 | -0.23 | 0     | 0.18  | -0.08 | 0.04  | -0.08 | - |
| 0.59     | -0.32      | -0.39      | -0.34 | 0.01  | 0.29  | -0.59 | -0.23 | -0.04 | -0.12 | -0.12 | -0.23 |       |   |
| GENE972X | 15845_at   | 15845_at   | 1     | -0.39 | -0.64 | -1.08 | -0.68 | -1.32 | -0.94 | -     |       |       |   |
| 0.62     | -1.02      | -0.86      | -0.3  | -0.05 | 0.01  | -0.15 | -0.49 | -0.39 | 0.15  | 0.07  | 0.07  | 0.29  | - |
|          | 0.26       | -0.21      | -0.55 | 0.08  | 0.05  | 0.32  | -0.78 | -0.04 | -0.05 | 0.04  | -0.55 | 0.01  |   |
| GENE975X | 20629_at   | 20629_at   | 1     | -0.66 | -0.62 | -1.39 | -1.18 | -0.71 | -0.2  | -     |       |       |   |
| 0.94     | -1.12      | 0.13       | -0.2  | -0.12 | -1.15 | -0.05 | -0.37 | -0.25 | 0.01  | -0.51 | -0.23 | -0.68 | - |
| 0.05     | -0.39      | -0.04      | 0.22  | 0.26  | 0.51  | -0.34 | -1.39 | -0.23 | -0.13 | -0.32 | -0.18 |       |   |
| GENE974X | 12029_at   | 12029_at   | 1     | -0.43 | -0.08 | -1.08 | -1    | -1.12 | -0.78 | -     |       |       |   |
| 0.83     | -1         | -0.47      | -0.64 | 0.21  | -1    | -0.08 | -0.71 | -0.25 | 0.01  | -0.18 | -0.05 | -0.49 | - |
|          | 0.65       | 0.13       | -0.59 | 0.05  | 0.17  | 0.35  | -0.59 | -0.66 | -0.12 | -0.21 | 0.23  | 0.35  |   |
| GENE891X | 18085_r_at | 18085_r_at | 1     | -0.73 | -0.97 | -1.88 | -1.35 | -1.39 | -1.08 | -     |       |       |   |
| 0.83     | -0.62      | -0.59      | -0.3  | -0.47 | -0.23 | -0.49 | -0.02 | -0.28 | -0.1  | -0.3  | -0.45 | -0.59 | - |
| 0.26     | -0.47      | -0.53      | -0.1  | 0.08  | 0.32  | -0.43 | -0.05 | -0.25 | -0.18 | 0.04  | 0.21  |       |   |
| GENE862X | 13121_at   | 13121_at   | 1     | -1.12 | -1.18 | -2.18 | -2    | -0.97 | -0.91 | -     |       |       |   |
| 1.21     | -1.05      | -0.07      | -0.71 | -0.53 | -0.55 | -0.41 | -0.47 | -0.64 | 0.02  | -0.2  | -0.41 | -0.57 | - |
| 0.15     | -0.66      | -0.07      | -0.1  | -0.12 | 0.12  | -0.73 | -0.43 | -0.3  | -0.39 | 0.01  | -0.15 |       |   |
| GENE861X | 16957_at   | 16957_at   | 1     | -0.62 | -1.69 | -2.05 | -2.05 | -1.51 | -1.15 | -     |       |       |   |
| 1.51     | -1.12      | -0.18      | -0.62 | -0.66 | -0.81 | -0.55 | -0.28 | -0.88 | -0.13 | 0.08  | -0.71 | -0.64 | - |
| 0.49     | -0.71      | -0.43      | -0.26 | 0.11  | 0.28  | -0.34 | -0.37 | -0.08 | -0.26 | 0.02  | -0.12 |       |   |
| GENE800X | 16960_at   | 16960_at   | 1     | -0.51 | -0.94 | -1.59 | -1.69 | -1.12 | -0.94 | -     |       |       |   |
| 1.43     | -1.18      | -0.1       | -0.39 | -0.25 | -0.08 | 0     | -0.3  | -0.53 | 0     | 0.15  | -0.62 | -0.73 | - |
| 0.35     | -0.68      | -0.68      | -0.51 | -0.02 | 0.23  | -0.71 | -0.51 | -0.16 | -0.32 | 0.04  | 0.05  |       |   |
| GENE799X | 19375_at   | 19375_at   | 1     | -0.55 | -0.88 | -2.05 | -1.69 | -1.59 | -1.25 | -     |       |       |   |
| 1.78     | -1.51      | -0.35      | -0.64 | -0.53 | -0.16 | -0.13 | -0.66 | -0.66 | 0.11  | 0.23  | -0.64 | -0.76 | - |
| 0.37     | -0.41      | -1         | -0.26 | -0.04 | 0.17  | -0.73 | -0.81 | -0.08 | -0.2  | -0.26 | 0.01  |       |   |
| GENE798X | 18247_at   | 18247_at   | 1     | -1.32 | -1.94 | -3.32 | -3.47 | -2.55 | -2.12 | -     |       |       |   |
| 2.83     | -2.73      | -0.53      | -1.05 | -0.94 | -0.73 | -0.55 | -1.08 | -1.21 | 0.02  | 0.01  | -1.02 | -1.35 | - |
| 0.34     | -0.71      | -1.51      | -0.55 | -0.18 | 0.04  | -1.39 | -0.81 | -0.26 | -0.37 | 0.34  | 0.12  |       |   |
| GENE797X | 18666_s_at | 18666_s_at | 1     | -0.64 | -1.51 | -3.32 | -2.73 | -2.32 | -1.83 | -     |       |       |   |
| 2.73     | -1.83      | -0.57      | -0.34 | -0.28 | -0.16 | -0.23 | -0.51 | -0.78 | 0.46  | 0.26  | -0.59 | -1.32 | - |
| 0.43     | -0.83      | -1.18      | -0.76 | -0.43 | -0.37 | -0.71 | -0.62 | -0.2  | -0.1  | -0.41 | -0.13 |       |   |
| GENE796X | 19887_s_at | 19887_s_at | 1     | -1    | -1.12 | -2.83 | -2.55 | -2.39 | -2    | -     |       |       |   |
| 2.25     | -2         | -0.53      | -0.47 | -0.41 | -0.05 | -0.45 | -1.08 | -0.55 | 0.08  | 0.13  | -0.73 | -1.28 | - |
| 0.32     | -0.83      | -1.43      | -1.15 | -0.88 | -0.28 | -1    | -0.78 | -0.25 | -0.12 | -0.13 | 0.12  |       |   |
| GENE795X | 12218_at   | 12218_at   | 1     | -1.69 | -1.43 | -4.05 | -3.47 | -3.47 | -2.47 | -     |       |       |   |
| 2.94     | -2.25      | -0.73      | -0.62 | -0.47 | -0.07 | -0.1  | -0.53 | -0.88 | 0.25  | 0.36  | -0.91 | -1.55 | - |
| 0.62     | -1.05      | -1.35      | -1.18 | -0.86 | -0.25 | -1.59 | -0.62 | -0.35 | -0.13 | -0.51 | 0.27  |       |   |
| GENE794X | 16160_f_at | 16160_f_at | 1     | -0.94 | -1.59 | -2.55 | -2.73 | -1.88 | -1.08 | -     |       |       |   |
| 1.88     | -1.51      | -0.68      | -1    | -0.51 | -0.86 | -0.86 | -0.81 | -1.28 | 0.2   | -0.05 | -0.47 | -0.55 | - |
| 0.57     | -1.21      | -1.21      | -0.86 | -0.78 | -0.32 | -1    | -0.45 | -0.26 | -0.37 | 0.4   | -0.01 |       |   |
| GENE793X | 17385_at   | 17385_at   | 1     | -0.81 | -1    | -1.64 | -1.64 | -1.28 | -1.05 | -     |       |       |   |
| 0.94     | -0.81      | -0.35      | -0.34 | -0.23 | -0.59 | -0.45 | -0.53 | -0.66 | -0.45 | -0.07 | -0.45 | -0.45 | - |
| 0.35     | -0.57      | -0.64      | -0.62 | -0.41 | -0.18 | -0.73 | -0.49 | -0.15 | -0.05 | -0.04 | -0.12 |       |   |
| GENE792X | 18628_at   | 18628_at   | 1     | -2.64 | -3.05 | -4.64 | -5.64 | -3.47 | -3.18 | -     |       |       |   |
| 3.64     | -2.55      | -0.64      | -0.94 | -0.49 | -1.21 | -1.05 | -1.35 | -1.25 | -0.49 | -0.12 | -1.15 | -1.25 | - |
| 0.86     | -1.59      | -1.28      | -1.51 | -1.05 | -0.43 | -1.64 | -0.78 | -0.02 | 0.05  | -0.08 | 0     |       |   |

|          |            |            |       |       |       |       |       |       |       |       |       |       |       |   |
|----------|------------|------------|-------|-------|-------|-------|-------|-------|-------|-------|-------|-------|-------|---|
| GENE791X | 17506_s_at | 17506_s_at | 1     | -1    | -1.25 | -2.25 | -2.18 | -1.43 | -1.15 | -     |       |       |       |   |
|          | 1.32       | -1.43      | -0.12 | -0.73 | -0.47 | -0.25 | -0.16 | -0.59 | -0.88 | 0.11  | -0.01 | -0.66 | -1.12 | - |
|          | 0.45       | -0.76      | -0.49 | -0.81 | -0.64 | -0.39 | -0.81 | -0.76 | -0.28 | -0.13 | -0.39 | -0.15 |       |   |
| GENE790X | 20050_at   | 20050_at   | 1     | -1.55 | -1.83 | -3.83 | -3.32 | -2.18 | -1.78 | -     |       |       |       |   |
|          | 2.39       | -2.05      | -0.62 | -1.18 | -1.25 | -0.41 | -0.78 | -0.91 | -1.32 | -0.18 | -0.53 | -0.97 | -1.12 | - |
|          | 0.35       | -0.68      | -1.02 | -0.86 | -0.62 | -0.13 | -1.28 | -1    | -0.26 | -0.76 | -0.49 | -0.28 |       |   |
| GENE789X | 13654_at   | 13654_at   | 1     | -1.55 | -1.35 | -4.64 | -4.05 | -2.64 | -2    | -     |       |       |       |   |
|          | 2.73       | -2.32      | -0.34 | -1.28 | -1    | -0.47 | 0.01  | -0.94 | -1.43 | -0.13 | -0.16 | -0.86 | -1    | - |
|          | 0.57       | -1.02      | -1.25 | -1.18 | -1.05 | -0.55 | -1.18 | -1.25 | -0.45 | -0.26 | -0.53 | -0.41 |       |   |
| GENE386X | 15898_at   | 15898_at   | 1     | -1.35 | -0.88 | -1.78 | -1.15 | -0.97 | -0.73 | -     |       |       |       |   |
|          | 0.81       | -1.05      | -0.02 | -1.05 | -0.13 | -0.37 | -0.07 | -0.3  | -0.55 | 0.05  | 0.16  | -0.43 | -0.71 | - |
|          | 0.05       | -0.2       | -0.41 | -0.26 | -0.16 | 0.36  | -1    | -0.51 | 0.08  | 0.07  | -0.04 | 0.17  |       |   |
| GENE385X | 20628_at   | 20628_at   | 1     | -1.64 | -1.15 | -1.94 | -1.88 | -1.78 | -1.94 | -     |       |       |       |   |
|          | 1.32       | -1.69      | -0.39 | -1.94 | -0.34 | -0.81 | -0.21 | -0.32 | -0.51 | 0     | -0.13 | -0.62 | -1.43 | - |
|          | 0.66       | -1.28      | -0.78 | -0.05 | -0.18 | 0.51  | -1.02 | -2.12 | -0.49 | -0.23 | -0.62 | -0.26 |       |   |
| GENE384X | 12028_at   | 12028_at   | 1     | -1.59 | -2.12 | -4.05 | -3.32 | -3.05 | -2.73 | -     |       |       |       |   |
|          | 3.83       | -2.73      | -0.73 | -2.32 | -0.94 | -1.73 | -0.86 | -2.05 | -2.55 | -0.15 | 0.21  | -1.83 | -2.12 | - |
|          | 0.34       | -1.28      | -1.55 | -0.3  | -0.1  | 0.44  | -1.39 | -2.83 | -0.39 | -0.18 | -0.2  | 0.34  |       |   |
| GENE450X | 20665_s_at | 20665_s_at | 1     | -0.88 | -0.55 | -0.39 | -0.76 | -0.66 | -0.73 | -     |       |       |       |   |
|          | 0.49       | -1.25      | -0.04 | -0.07 | 0.04  | -0.25 | -0.35 | -0.64 | -0.3  | -0.18 | -0.66 | -0.18 | -0.15 | 0 |
|          |            | -0.05      | -0.15 | -0.16 | -0.16 | 0.09  | 0.08  | -0.83 | -0.18 | -0.41 | 0.17  | 0.01  |       |   |
| GENE449X | 13001_at   | 13001_at   | 1     | -1.55 | -1.18 | -1    | -1.64 | -1.35 | -1.28 | -     |       |       |       |   |
|          | 1.59       | -1.64      | -0.49 | -0.08 | -0.37 | -1.35 | -0.57 | -1.15 | -0.21 | -0.37 | -1    | -0.53 | -1.21 | - |
|          | 0.88       | -1.05      | -0.18 | -0.47 | -0.39 | 0.13  | 0.07  | -2.55 | -0.37 | -0.32 | -0.66 | -0.53 |       |   |
| GENE448X | 12496_at   | 12496_at   | 1     | -0.78 | -0.91 | -1.51 | -1.25 | -1.39 | -1.25 | -     |       |       |       |   |
|          | 1.64       | -1.64      | -0.41 | -0.3  | -0.25 | -1.18 | -0.41 | -0.62 | -0.45 | -0.62 | -0.66 | -0.71 | -0.73 | - |
|          | 0.34       | -0.43      | -0.81 | -0.66 | -0.45 | -0.04 | -0.21 | -1.64 | -0.39 | -0.05 | -0.04 | 0.07  |       |   |
| GENE986X | 16041_s_at | 16041_s_at | 1     | -0.39 | -0.39 | -0.71 | -0.64 | -0.32 | -0.76 | -     |       |       |       |   |
|          | 0.91       | -1.55      | 0.11  | -0.55 | -0.39 | -0.2  | -0.1  | -0.88 | -0.83 | 0.12  | 0.12  | -0.21 | -0.57 | - |
|          |            | 0.07       | -0.05 | -0.1  | -0.01 | 0.07  | 0.01  | 0.27  | -0.1  | 0.25  | 0.2   | 0.27  | 0.21  |   |
| GENE985X | 17997_s_at | 17997_s_at | 1     | -0.83 | -0.18 | -0.97 | -0.64 | -0.34 | -0.94 | -     |       |       |       |   |
|          | 0.94       | -1.51      | -0.2  | -0.81 | -0.2  | -0.21 | -0.28 | -1.08 | -1.05 | 0.41  | 0.02  | -0.51 | -0.34 | - |
|          |            | 0.09       | -0.07 | -0.23 | -0.16 | -0.13 | -0.1  | 0.31  | 0.44  | 0.32  | 0.27  | 0.23  | 0.08  |   |
| GENE725X | 14998_at   | 14998_at   | 1     | -0.41 | -1.25 | -1.73 | -1.35 | -0.26 | -0.28 | -     |       |       |       |   |
|          | 1.39       | -2.05      | -0.13 | -0.18 | 0.42  | -0.08 | -0.66 | -1.15 | -1    | -0.16 | -0.83 | -0.26 | 0.17  | - |
|          | 0.53       | -0.57      | -0.1  | -0.41 | -0.25 | -0.02 | 0.55  | -0.16 | 0.33  | 0.33  | -0.02 | 0.04  |       |   |
| GENE460X | 17901_at   | 17901_at   | 1     | -1.35 | -1.18 | -1.88 | -2.18 | -1.25 | -0.62 | -     |       |       |       |   |
|          | 2.32       | -2.39      | -0.64 | -0.78 | -0.59 | -0.59 | -0.97 | -2.12 | -1.08 | -0.62 | -1    | -0.64 | 0.18  | - |
|          | 0.3        | -1.55      | -0.12 | -0.76 | -0.57 | 0.17  | 0.34  | -0.26 | -0.78 | -0.53 | 0.45  | 0.8   |       |   |
| GENE829X | 13120_at   | 13120_at   | 1     | -1.32 | -1.83 | -3.64 | -3.05 | -2.47 | -1.59 | -     |       |       |       |   |
|          | 3.83       | -2.39      | -0.25 | -0.55 | -0.34 | -0.53 | -0.23 | -0.91 | -0.62 | 0.27  | 0.28  | -0.68 | -0.97 | - |
|          | 0.73       | -0.73      | -0.97 | -0.78 | -0.47 | -0.32 | -0.55 | -0.13 | 0.09  | -0.1  | 0.05  | 0.23  |       |   |
| GENE828X | 16673_at   | 16673_at   | 1     | -0.88 | -1.83 | -2.25 | -1.64 | -1.51 | -1.12 | -     |       |       |       |   |
|          | 3.32       | -2.18      | -0.28 | -0.35 | -0.26 | -0.49 | -0.78 | -0.66 | -0.43 | 0.17  | -0.16 | -0.32 | -0.64 | - |
|          | 0.62       | -0.71      | -0.55 | -1    | -0.53 | -0.34 | -0.86 | -0.23 | -0.32 | -0.15 | -0.15 | -0.18 |       |   |
| GENE827X | 16494_at   | 16494_at   | 1     | -1.59 | -1.59 | -2.18 | -2.25 | -1.88 | -1.59 | -     |       |       |       |   |
|          | 3.18       | -2.18      | -0.21 | -0.83 | -0.49 | -0.32 | -0.32 | -0.49 | -0.78 | 0.23  | -0.25 | -0.35 | -1.35 | - |
|          | 0.81       | -0.91      | -0.88 | -1    | -0.86 | -0.68 | -0.78 | -0.66 | -0.49 | -0.15 | -0.25 | -0.1  |       |   |
| GENE826X | 15624_s_at | 15624_s_at | 1     | -0.51 | -0.76 | -1.78 | -1.08 | -1.51 | -1.15 | -     |       |       |       |   |
|          | 1.73       | -1.39      | -0.66 | -0.39 | -0.23 | -0.21 | -0.51 | -0.76 | -0.51 | 0.34  | -0.21 | -0.02 | -0.53 | - |
|          | 0.55       | -0.45      | -0.91 | -0.57 | -0.51 | -0.21 | -0.71 | -0.37 | -0.35 | -0.18 | -0.25 | -0.01 |       |   |
| GENE825X | 15035_at   | 15035_at   | 1     | -0.86 | -1.08 | -2.12 | -1.47 | -1.64 | -1.25 | -     |       |       |       |   |
|          | 2.05       | -1.83      | -0.34 | -0.16 | -0.08 | 0.13  | 0     | -0.49 | -0.47 | 0.18  | -0.01 | -0.37 | -0.68 | - |
|          | 0.32       | -0.55      | -0.97 | -0.64 | -0.45 | -0.08 | -0.41 | -0.45 | -0.35 | -0.2  | -0.12 | 0.01  |       |   |
| GENE824X | 13547_at   | 13547_at   | 1     | -2.83 | -3.32 | -6.64 | -5.64 | -5.05 | -4.64 | -     |       |       |       |   |
|          | 6.64       | -5.64      | -1.12 | -0.73 | -0.18 | -0.02 | -0.45 | -2.12 | -1.51 | 0.23  | -0.51 | -0.81 | -0.97 | - |
|          | 1.15       | -1.43      | -2.25 | -2.47 | -2.73 | -1.28 | -2.05 | -0.39 | -0.15 | -0.1  | -1.02 | -0.02 |       |   |

|          |            |            |       |       |       |       |       |       |       |       |       |       |    |
|----------|------------|------------|-------|-------|-------|-------|-------|-------|-------|-------|-------|-------|----|
| GENE823X | 14571_at   | 14571_at   | 1     | -1.55 | -1.32 | -2.94 | -1.78 | -2    | -1.73 | -     |       |       |    |
| 2.47     | -2.05      | -0.45      | -0.57 | 0.04  | -0.12 | -0.47 | -0.86 | -0.57 | 0.23  | -0.57 | -0.08 | -0.66 | -  |
| 0.73     | -0.49      | -0.91      | -0.78 | -0.66 | -0.37 | -1    | -0.45 | -0.66 | -0.13 | 0.05  | -0.12 |       |    |
| GENE822X | 17454_at   | 17454_at   | 1     | -1.83 | -1.32 | -3.05 | -2.73 | -2.47 | -2.18 | -     |       |       |    |
| 2.83     | -2.39      | -0.76      | -0.43 | -0.53 | -0.39 | -0.57 | -1.15 | -0.57 | -0.21 | -0.39 | -0.66 | -0.91 | -  |
| 0.39     | -0.83      | -1.47      | -0.94 | -0.66 | -0.3  | -0.76 | -0.47 | -0.41 | -0.2  | 0.02  | 0.04  |       |    |
| GENE821X | 17393_at   | 17393_at   | 1     | -1.88 | -1.43 | -3.18 | -2.47 | -2.73 | -2.39 | -     |       |       |    |
| 3.32     | -2.73      | -0.97      | -0.76 | -0.71 | -0.32 | -0.49 | -0.81 | -0.43 | -0.18 | -0.41 | -0.64 | -1.05 | -  |
| 0.41     | -0.81      | -1.39      | -1.02 | -0.83 | -0.3  | -0.97 | -0.43 | -0.18 | -0.2  | -0.07 | -0.15 |       |    |
| GENE820X | 17916_at   | 17916_at   | 1     | -2.39 | -1.88 | -3.32 | -2.55 | -2.64 | -2.39 | -     |       |       |    |
| 3.18     | -2.94      | -0.68      | -0.3  | -0.15 | -0.26 | -0.51 | -1.18 | -0.76 | 0.01  | -0.3  | -0.43 | -0.88 | -  |
| 0.47     | -1.05      | -1.51      | -1.18 | -1.08 | -0.53 | -0.86 | -0.49 | -0.37 | -0.16 | -0.32 | -0.1  |       |    |
| GENE819X | 15079_at   | 15079_at   | 1     | -1.18 | -0.76 | -2    | -1.69 | -1.51 | -1.28 | -     |       |       |    |
| 1.94     | -1.55      | -0.81      | -0.66 | -0.41 | -0.18 | -0.3  | -0.81 | -0.62 | -0.05 | -0.32 | -0.62 | -0.68 |    |
| 0.02     | -0.59      | -0.97      | -0.35 | 0.11  | 0.07  | -0.86 | -0.43 | -0.23 | -0.12 | -0.18 | -0.02 |       |    |
| GENE818X | 12034_at   | 12034_at   | 1     | -1.15 | -1.08 | -2.64 | -2.12 | -1.83 | -2    | -     |       |       |    |
| 2.94     | -2.55      | -0.97      | -0.71 | -0.81 | -0.53 | -0.68 | -1.47 | -1    | -0.37 | -0.3  | -0.83 | -0.88 | -  |
| 0.1      | -0.62      | -1.12      | -0.34 | -0.28 | 0.15  | -0.76 | -0.94 | -0.45 | -0.41 | -0.15 | -0.1  |       |    |
| GENE810X | 18046_s_at | 18046_s_at | 1     | -1.47 | -1.18 | -2.12 | -1.83 | -2.12 | -2.05 | -     |       |       |    |
| 2.39     | -2.12      | -1.05      | -0.59 | -0.49 | -0.41 | -0.66 | -1.28 | -0.88 | -0.05 | -0.55 | -0.62 | -0.86 | -  |
| 0.55     | -0.66      | -1.69      | -0.41 | -0.25 | 0.05  | -0.81 | -0.28 | -0.34 | -0.21 | 0.04  | 0.01  |       |    |
| GENE809X | 18274_s_at | 18274_s_at | 1     | -1.28 | -1.64 | -2.47 | -2.05 | -2.73 | -2.39 | -     |       |       |    |
| 3.18     | -2.73      | -1.08      | -0.59 | -0.47 | -0.59 | -0.68 | -1.51 | -0.68 | -0.04 | -0.57 | -0.49 | -0.83 | -  |
| 0.57     | -0.64      | -1.64      | -0.73 | -0.53 | 0.01  | -0.94 | -0.43 | -0.35 | -0.13 | 0.22  | 0.13  |       |    |
| GENE817X | 16057_s_at | 16057_s_at | 1     | -0.81 | -0.83 | -1.51 | -1.32 | -1.35 | -1.12 | -     |       |       |    |
| 1.51     | -1.32      | -0.34      | -0.59 | -0.35 | -0.47 | -0.62 | -1    | -0.53 | -0.1  | -0.35 | -0.37 | -0.45 | -  |
| 0.26     | -0.39      | -0.57      | -0.3  | -0.32 | -0.45 | -0.47 | -0.28 | -0.41 | -0.08 | 0.07  | -0.2  |       |    |
| GENE816X | 14523_at   | 14523_at   | 1     | -1.25 | -1.08 | -1.88 | -1.69 | -1.64 | -1.35 | -2    |       |       |    |
| -1.69    | -0.88      | -0.88      | -0.51 | -0.62 | -0.73 | -1.25 | -0.83 | -0.15 | -0.16 | -0.53 | -0.71 | -     |    |
| 0.13     | -0.49      | -1         | -0.64 | -0.55 | -0.35 | -0.55 | -0.28 | -0.2  | -0.08 | -0.18 | -0.21 |       |    |
| GENE815X | 14269_at   | 14269_at   | 1     | -1.25 | -1.35 | -2.05 | -1.78 | -1.83 | -1.78 | -     |       |       |    |
| 1.94     | -2.18      | -0.78      | -1.21 | -0.71 | -0.81 | -0.76 | -1.35 | -1.05 | -0.2  | -0.2  | -0.78 | -0.88 | -  |
| 0.16     | -0.37      | -1.02      | -0.83 | -0.53 | -0.34 | -0.71 | -0.28 | -0.15 | -0.16 | -0.2  | -0.05 |       |    |
| GENE812X | 15054_at   | 15054_at   | 1     | -1.25 | -1.51 | -1.88 | -2.39 | -2.25 | -1.88 | -     |       |       |    |
| 2.39     | -2.55      | -0.51      | -0.91 | -0.53 | -0.86 | -0.64 | -1.59 | -0.97 | 0.05  | -0.39 | -0.57 | -1.05 | -  |
| 0.83     | -0.81      | -0.86      | -0.59 | -0.64 | -0.02 | -0.66 | -0.97 | -0.39 | -0.15 | -0.39 | -0.05 |       |    |
| GENE811X | 15093_at   | 15093_at   | 1     | -1.59 | -2.18 | -3.18 | -2.83 | -2.55 | -2.12 | -     |       |       |    |
| 3.83     | -3.05      | -1.05      | -1.08 | -0.62 | -0.78 | -0.86 | -1.78 | -1.02 | 0.29  | -0.86 | -0.62 | -1    | -1 |
| -0.86    | -1.55      | -1.02      | -0.81 | -0.39 | -0.81 | -1.12 | -0.68 | -0.35 | -0.01 | 0.04  |       |       |    |
| GENE814X | 16125_s_at | 16125_s_at | 1     | -1.12 | -1.55 | -2.32 | -2.47 | -1.73 | -1.55 | -     |       |       |    |
| 2.32     | -2.25      | -0.39      | -0.76 | -0.71 | -0.41 | -0.57 | -1.25 | -1.08 | -0.04 | -0.18 | -0.91 | -1.32 | -  |
| 0.68     | -0.68      | -1         | -0.55 | -0.37 | -0.21 | -0.73 | -0.28 | -0.05 | -0.02 | 0.04  | -0.35 |       |    |
| GENE813X | 15634_s_at | 15634_s_at | 1     | -1.21 | -1.51 | -2.32 | -2.05 | -2    | -1.78 | -     |       |       |    |
| 2.18     | -1.83      | -0.68      | -0.81 | -0.86 | -0.43 | -0.57 | -0.81 | -0.91 | 0.08  | -0.2  | -0.88 | -1.18 | -  |
| 0.66     | -0.68      | -1.32      | -0.37 | -0.3  | -0.05 | -0.73 | -0.49 | 0     | -0.16 | -0.01 | -0.15 |       |    |
| GENE783X | 18733_r_at | 18733_r_at | 1     | -0.81 | -1.25 | -2.25 | -2    | -2.12 | -1.69 | -2    |       |       |    |
| -1.83    | -0.41      | -0.57      | -0.66 | -0.55 | -0.55 | -1.02 | -0.88 | -0.07 | -0.28 | -0.76 | -0.83 | -     |    |
| 0.08     | -0.51      | -1.05      | -0.76 | -0.47 | -0.32 | -0.41 | -0.23 | -0.28 | -0.13 | 0.07  | 0.05  |       |    |
| GENE782X | 18736_at   | 18736_at   | 1     | -1.21 | -1.43 | -2.83 | -2.32 | -2.25 | -1.88 | -     |       |       |    |
| 2.47     | -2.18      | -0.66      | -0.64 | -0.68 | -0.51 | -0.71 | -1.21 | -0.88 | -0.21 | -0.39 | -0.76 | -0.94 | -  |
| 0.3      | -0.62      | -1.21      | -0.83 | -0.62 | -0.45 | -0.53 | -0.28 | -0.39 | -0.15 | 0.04  | 0.02  |       |    |
| GENE781X | 15986_s_at | 15986_s_at | 1     | -1.05 | -1.59 | -2.64 | -2.39 | -2.25 | -1.83 | -     |       |       |    |
| 2.25     | -1.78      | -0.62      | -0.57 | -0.62 | -0.68 | -0.57 | -0.86 | -0.83 | -0.16 | -0.08 | -0.73 | -0.83 | -  |
| 0.39     | -0.64      | -1.02      | -0.86 | -0.49 | -0.28 | -0.47 | -0.18 | -0.13 | -0.1  | 0.01  | -0.04 |       |    |
| GENE780X | 18053_s_at | 18053_s_at | 1     | -0.94 | -1.78 | -2.55 | -2.18 | -2.32 | -1.83 | -     |       |       |    |
| 2.18     | -1.94      | -0.41      | -0.41 | -0.43 | -0.59 | -0.68 | -0.88 | -0.83 | -0.05 | -0.01 | -0.59 | -0.83 | -  |
| 0.32     | -0.66      | -1.02      | -0.94 | -0.66 | -0.41 | -0.55 | -0.28 | -0.28 | -0.04 | -0.1  | 0.11  |       |    |



|          |            |            |       |       |       |       |       |       |       |       |       |       |   |
|----------|------------|------------|-------|-------|-------|-------|-------|-------|-------|-------|-------|-------|---|
| GENE779X | 17532_at   | 17532_at   | 1     | -1.05 | -1.28 | -2.25 | -2.25 | -2.18 | -1.55 | -2    |       |       |   |
|          | -1.73      | -0.35      | -0.55 | -0.34 | -0.32 | -0.37 | -0.97 | -0.86 | 0.02  | -0.13 | -0.83 | -0.97 | - |
| 0.3      | -0.73      | -0.88      | -0.94 | -0.73 | -0.45 | -0.91 | -0.51 | -0.28 | -0.05 | -0.3  | 0.05  |       |   |
| GENE778X | 14579_at   | 14579_at   | 1     | -1.43 | -1.39 | -2.83 | -2.39 | -2.55 | -2.18 | -     |       |       |   |
| 2.64     | -2.55      | -0.71      | -0.71 | -0.51 | -0.45 | -0.57 | -1.15 | -1.02 | -0.08 | -0.26 | -0.73 | -1    | - |
| 0.53     | -0.81      | -1.05      | -1    | -0.76 | -0.39 | -0.83 | -0.47 | -0.45 | -0.15 | -0.32 | -0.07 |       |   |
| GENE777X | 20164_at   | 20164_at   | 1     | -1.55 | -1.55 | -2.64 | -2.47 | -2.05 | -1.78 | -     |       |       |   |
| 2.47     | -2         | -0.68      | -0.47 | -0.62 | -0.53 | -0.71 | -1.12 | -0.66 | -0.45 | -0.41 | -0.78 | -0.88 | - |
| 0.18     | -0.62      | -1.32      | -0.88 | -0.59 | -0.26 | -0.78 | -0.68 | -0.35 | -0.59 | 0.12  | 0.11  |       |   |
| GENE776X | 17947_at   | 17947_at   | 1     | -1.55 | -1.69 | -2.73 | -2.32 | -2.25 | -1.83 | -     |       |       |   |
| 2.47     | -2.12      | -0.64      | -1.12 | -0.83 | -0.78 | -0.71 | -1.18 | -0.94 | -0.3  | -0.37 | -0.83 | -1    | - |
| 0.45     | -0.55      | -1.15      | -0.94 | -0.57 | -0.25 | -0.57 | -1    | -0.35 | -0.47 | 0.17  | 0.12  |       |   |
| GENE775X | 18634_at   | 18634_at   | 1     | -2.18 | -2.12 | -3.83 | -3.83 | -3.32 | -2.64 | -     |       |       |   |
| 3.05     | -3.18      | -0.71      | -1.08 | -1.05 | -0.73 | -0.88 | -1.88 | -1.21 | -0.39 | -0.39 | -1.18 | -1.43 | - |
| 0.04     | -0.59      | -1.78      | -1.32 | -0.94 | -0.28 | -1.05 | -0.57 | -0.16 | -0.04 | 0.42  | 0.13  |       |   |
| GENE774X | 11994_at   | 11994_at   | 1     | -2.18 | -3.05 | -4.64 | -4.64 | -3.83 | -2.94 | -     |       |       |   |
| 3.83     | -3.64      | -1.12      | -1.02 | -1.05 | -1.25 | -1.73 | -1.59 | -1.25 | -0.34 | -0.34 | -1.35 | -2.12 | - |
| 0.41     | -1.32      | -2         | -1.59 | -0.81 | -0.3  | -1.39 | -2.18 | -0.59 | -0.26 | -0.28 | -0.21 |       |   |
| GENE786X | 16612_s_at | 16612_s_at | 1     | -1.18 | -1    | -1.94 | -1.73 | -1.32 | -1    | -     |       |       |   |
| 1.78     | -1.15      | -0.13      | -0.25 | -0.45 | -0.26 | -0.45 | -0.62 | -0.55 | -0.08 | -0.21 | -0.62 | -0.68 | - |
| 0.25     | -0.57      | -0.62      | -0.39 | -0.45 | -0.3  | -0.57 | -0.12 | -0.28 | -0.08 | 0.32  | 0.04  |       |   |
| GENE785X | 14725_s_at | 14725_s_at | 1     | -1.35 | -1.64 | -2.83 | -2.55 | -2.05 | -1.59 | -     |       |       |   |
| 2.73     | -1.64      | -0.1       | -0.64 | -0.51 | -0.41 | -0.57 | -0.83 | -0.81 | -0.04 | -0.3  | -0.59 | -0.78 | - |
| 0.35     | -0.68      | -1.25      | -0.78 | -0.57 | -0.37 | -0.76 | -0.26 | -0.25 | 0.11  | 0.2   | 0     |       |   |
| GENE784X | 18281_at   | 18281_at   | 1     | -1.88 | -2.05 | -3.47 | -3.47 | -2.18 | -1.83 | -     |       |       |   |
| 3.64     | -2.47      | -0.34      | -0.91 | -0.76 | -0.59 | -0.47 | -1.15 | -0.91 | -0.18 | -0.37 | -0.91 | -1.18 | - |
| 0.47     | -0.97      | -1.08      | -0.97 | -0.76 | -0.43 | -1.21 | -1.02 | -0.34 | -0.37 | 0.13  | -0.08 |       |   |
| GENE788X | 18638_at   | 18638_at   | 1     | -1.32 | -1.18 | -1.73 | -1.39 | -1.39 | -1.15 | -     |       |       |   |
| 1.73     | -1.83      | -0.08      | -0.32 | -0.23 | -0.26 | -0.35 | -0.66 | -0.59 | -0.13 | -0.07 | -0.64 | -0.66 | - |
| 0.35     | -0.59      | -0.57      | -0.81 | -0.49 | -0.25 | -0.47 | -0.25 | -0.35 | -0.12 | 0     | -0.04 |       |   |
| GENE787X | 14454_at   | 14454_at   | 1     | -1.59 | -1.35 | -2    | -2    | -1.94 | -1.21 | -     |       |       |   |
| 1.64     | -1.59      | 0.02       | -0.18 | -0.45 | -0.39 | -0.41 | -0.91 | -0.47 | -0.07 | 0     | -0.53 | -1.02 | - |
| 0.45     | -0.66      | -0.76      | -0.73 | -0.43 | -0.21 | -0.39 | -0.37 | -0.18 | -0.1  | 0.04  | -0.1  |       |   |
| GENE754X | 18288_at   | 18288_at   | 1     | -1.83 | -2.05 | -2.94 | -2.64 | -2.25 | -1.83 | -     |       |       |   |
| 2.73     | -2.39      | -0.13      | -0.28 | -0.49 | -0.57 | -0.49 | -1.18 | -0.51 | -0.23 | -0.28 | -0.51 | -0.66 | - |
| 0.86     | -0.88      | -0.78      | -1.08 | -0.71 | -0.32 | -0.32 | -0.28 | -0.23 | -0.35 | 0.18  | -0.18 |       |   |
| GENE773X | 12234_at   | 12234_at   | 1     | -1.05 | -1    | -1.64 | -1.78 | -1.39 | -1.21 | -     |       |       |   |
| 1.64     | -1.43      | -0.2       | -0.21 | -0.49 | -0.47 | -0.34 | -0.76 | -0.55 | -0.43 | -0.2  | -0.76 | -0.66 | - |
| 0.2      | -0.66      | -0.94      | -0.76 | -0.35 | -0.18 | -0.16 | -0.35 | -0.25 | -0.37 | 0.31  | 0.08  |       |   |
| GENE772X | 12036_at   | 12036_at   | 1     | -1.35 | -1.02 | -1.94 | -1.78 | -1.73 | -1.47 | -     |       |       |   |
| 1.94     | -1.88      | -0.59      | -0.07 | -0.49 | -0.49 | -0.59 | -0.91 | -0.43 | -0.35 | -0.25 | -0.64 | -0.51 | - |
| 0.07     | -0.47      | -1.25      | -0.59 | -0.28 | -0.1  | -0.32 | -0.23 | -0.28 | -0.37 | 0.35  | 0.15  |       |   |
| GENE771X | 19963_at   | 19963_at   | 1     | -2.05 | -1.73 | -3.05 | -2.94 | -2.55 | -2.18 | -     |       |       |   |
| 2.73     | -2.47      | -0.64      | -0.39 | -0.62 | -0.57 | -0.62 | -1.05 | -0.73 | -0.39 | -0.41 | -0.86 | -0.94 | - |
| 0.35     | -1         | -1.47      | -1.02 | -0.57 | -0.2  | -0.43 | -0.16 | -0.28 | -0.2  | 0.26  | 0.02  |       |   |
| GENE770X | 19964_g_at | 19964_g_at | 1     | -1.94 | -1.55 | -2.94 | -2.83 | -2.73 | -2.47 | -     |       |       |   |
| 2.55     | -2.39      | -0.88      | -0.47 | -0.62 | -0.55 | -0.71 | -1.25 | -0.86 | -0.26 | -0.37 | -0.94 | -1.02 | - |
| 0.23     | -0.83      | -1.64      | -1.05 | -0.73 | -0.32 | -0.64 | -0.04 | -0.3  | -0.04 | 0.26  | 0.04  |       |   |
| GENE769X | 19996_at   | 19996_at   | 1     | -2.64 | -1.78 | -3.47 | -3.18 | -3.05 | -2.73 | -     |       |       |   |
| 2.94     | -3.18      | -0.88      | -0.83 | -0.88 | -1    | -1.08 | -1.51 | -1.25 | -0.59 | -0.86 | -1.32 | -0.88 | - |
| 0.59     | -1         | -1.55      | -1.08 | -0.78 | -0.37 | -0.2  | -0.13 | -0.28 | -0.25 | 0.37  | 0.02  |       |   |
| GENE767X | 17000_at   | 17000_at   | 1     | -1.69 | -1.32 | -2.32 | -2.25 | -1.73 | -1.51 | -     |       |       |   |
| 2.83     | -2.39      | -0.45      | -0.45 | -0.34 | -0.39 | -0.53 | -1.35 | -0.57 | -0.35 | -0.64 | -0.57 | -0.57 | - |
| 0.25     | -0.51      | -0.81      | -0.68 | -0.41 | -0.08 | -0.28 | -0.13 | -0.41 | -0.26 | -0.02 | -0.12 |       |   |
| GENE766X | 19968_at   | 19968_at   | 1     | -3.47 | -1.88 | -4.32 | -4.32 | -4.64 | -3.64 | -     |       |       |   |
| 5.05     | -5.05      | -1.15      | -1.43 | -1.28 | -1.25 | -1.18 | -2.39 | -1.78 | -0.62 | -1.12 | -1.39 | -1.21 | - |
| 0.37     | -1.25      | -1.35      | -1.69 | -1.47 | -0.73 | -1.69 | -0.76 | -0.45 | -0.47 | -0.15 | -0.13 |       |   |

|          |            |            |       |       |       |       |       |       |       |       |       |       |   |
|----------|------------|------------|-------|-------|-------|-------|-------|-------|-------|-------|-------|-------|---|
| GENE834X | 18080_at   | 18080_at   | 1     | -0.55 | -1.21 | -1.94 | -1.35 | -1.55 | -1.08 | -     |       |       |   |
| 1.69     | -1.12      | -0.47      | -0.21 | -0.35 | -0.32 | -0.43 | -0.37 | -0.43 | 0.04  | 0.04  | -0.53 | -0.51 | - |
| 0.37     | -0.28      | -0.71      | -0.23 | 0.04  | 0.11  | -0.32 | 0.08  | -0.13 | -0.02 | 0.05  | 0.11  |       |   |
| GENE833X | 16455_at   | 16455_at   | 1     | -0.97 | -1.47 | -2.47 | -1.83 | -1.83 | -1.47 | -     |       |       |   |
| 2.25     | -1.69      | -0.45      | -0.26 | -0.32 | -0.51 | -0.57 | -0.68 | -0.51 | 0.02  | -0.15 | -0.64 | -0.53 | - |
| 0.41     | -0.45      | -0.94      | -0.34 | -0.05 | 0.12  | -0.34 | -0.1  | -0.28 | -0.08 | 0.12  | 0.09  |       |   |
| GENE832X | 18082_at   | 18082_at   | 1     | -0.51 | -1.35 | -2    | -1.69 | -1.69 | -1.05 | -     |       |       |   |
| 1.83     | -1.28      | -0.43      | -0.2  | -0.39 | -0.53 | -0.53 | -0.39 | -0.41 | -0.02 | 0.01  | -0.49 | -0.45 | - |
| 0.07     | -0.3       | -0.62      | -0.34 | -0.08 | 0.05  | -0.26 | 0.09  | -0.08 | -0.05 | 0.12  | 0.11  |       |   |
| GENE831X | 15097_at   | 15097_at   | 1     | -1.15 | -2.32 | -3.05 | -2.64 | -2.64 | -2    | -     |       |       |   |
| 2.73     | -2.12      | -0.53      | -0.26 | -0.51 | -0.68 | -0.88 | -0.62 | -0.55 | -0.04 | -0.02 | -0.55 | -0.76 | - |
| 0.3      | -0.45      | -1         | -0.73 | -0.34 | -0.08 | -0.55 | 0.07  | -0.04 | 0.02  | 0     | 0.01  |       |   |
| GENE830X | 18220_s_at | 18220_s_at | 1     | -0.88 | -1.88 | -3.83 | -2.64 | -2.73 | -2.18 | -     |       |       |   |
| 2.94     | -2.47      | -0.66      | -0.88 | -0.37 | -0.88 | -0.78 | -1.32 | -1.12 | 0.29  | 0.33  | -0.86 | -0.64 | - |
| 0.35     | -0.59      | -1.39      | -0.78 | -0.39 | 0     | -0.53 | -0.28 | -0.23 | -0.02 | 0.11  | 0.11  |       |   |
| GENE846X | 18089_r_at | 18089_r_at | 1     | -0.49 | -1.43 | -1.88 | -1.73 | -1.64 | -1.08 | -     |       |       |   |
| 1.69     | -1.35      | -0.35      | -0.26 | -0.34 | -0.34 | -0.37 | -0.51 | -0.43 | -0.12 | -0.2  | -0.47 | -0.68 | 0 |
|          | -0.39      | -0.66      | -0.51 | -0.2  | -0.02 | -0.35 | -0.53 | -0.3  | -0.12 | -0.01 | 0.15  |       |   |
| GENE845X | 18088_i_at | 18088_i_at | 1     | -0.76 | -1.88 | -2.47 | -2.25 | -1.78 | -1.28 | -     |       |       |   |
| 2.12     | -1.64      | -0.55      | -0.35 | -0.47 | -0.66 | -0.73 | -0.64 | -0.68 | -0.05 | -0.26 | -0.53 | -0.83 | - |
| 0.57     | -0.62      | -0.81      | -0.62 | -0.3  | -0.07 | -0.49 | -0.25 | -0.21 | -0.21 | 0     | 0     |       |   |
| GENE844X | 17087_at   | 17087_at   | 1     | -1.12 | -2.18 | -3.05 | -2.73 | -2.47 | -1.59 | -     |       |       |   |
| 2.25     | -2         | -0.51      | -0.39 | -0.47 | -0.78 | -0.76 | -0.83 | -0.45 | -0.2  | -0.47 | -0.59 | -0.71 | - |
| 0.25     | -0.66      | -0.81      | -0.51 | -0.25 | -0.12 | -0.45 | -0.41 | -0.57 | -0.18 | 0.04  | 0     |       |   |
| GENE763X | 18732_i_at | 18732_i_at | 1     | -0.59 | -1.12 | -2    | -1.64 | -1.51 | -1.12 | -     |       |       |   |
| 1.55     | -1.47      | -0.13      | -0.41 | -0.51 | -0.55 | -0.55 | -0.55 | -0.64 | -0.25 | -0.26 | -0.53 | -0.66 | - |
| 0.15     | -0.49      | -0.49      | -0.35 | -0.08 | 0.05  | -0.28 | -0.3  | -0.28 | -0.2  | 0.08  | 0.04  |       |   |
| GENE850X | 18073_g_at | 18073_g_at | 1     | -0.97 | -1.32 | -1.88 | -1.51 | -1.43 | -1.08 | -     |       |       |   |
| 1.88     | -1.43      | -0.43      | -0.39 | -0.49 | -0.47 | -0.57 | -0.51 | -0.53 | -0.05 | 0.02  | -0.57 | -0.62 | - |
| 0.23     | -0.47      | -0.68      | -0.34 | -0.01 | 0.09  | -0.23 | -0.12 | -0.18 | -0.15 | 0.05  | -0.1  |       |   |
| GENE849X | 12800_at   | 12800_at   | 1     | -1.15 | -1.32 | -2    | -1.73 | -1.51 | -1.28 | -     |       |       |   |
| 2.05     | -1.73      | -0.53      | -0.43 | -0.43 | -0.53 | -0.49 | -0.68 | -0.51 | -0.18 | -0.2  | -0.53 | -0.55 | - |
| 0.28     | -0.53      | -0.73      | -0.43 | -0.15 | 0     | -0.16 | -0.26 | -0.21 | -0.26 | -0.07 | -0.01 |       |   |
| GENE848X | 16414_at   | 16414_at   | 1     | -1.32 | -1.39 | -2.05 | -1.78 | -1.55 | -1.25 | -2    |       |       |   |
|          | -1.83      | -0.43      | -0.26 | -0.47 | -0.37 | -0.51 | -0.53 | -0.51 | -0.32 | -0.2  | -0.64 | -0.55 | - |
| 0.12     | -0.49      | -0.59      | -0.47 | -0.2  | 0.11  | -0.3  | -0.04 | -0.28 | -0.08 | -0.04 | 0.05  |       |   |
| GENE847X | 15117_at   | 15117_at   | 1     | -1.55 | -2.18 | -2.64 | -1.94 | -2.39 | -1.69 | -     |       |       |   |
| 2.94     | -1.94      | -0.55      | -0.49 | -0.55 | -0.57 | -0.73 | -0.94 | -0.64 | -0.08 | -0.43 | -0.71 | -0.64 | - |
| 0.32     | -0.53      | -1.05      | -0.47 | -0.2  | 0.12  | -0.34 | -0.21 | -0.18 | -0.05 | 0.15  | 0.18  |       |   |
| GENE841X | 14563_at   | 14563_at   | 1     | -1.25 | -1.47 | -2.12 | -2.39 | -1.88 | -1.73 | -     |       |       |   |
| 2.12     | -2         | -0.51      | -0.62 | -0.35 | -0.64 | -0.49 | -0.88 | -0.53 | 0.15  | -0.41 | -0.53 | -0.86 | - |
| 0.49     | -0.81      | -0.91      | -0.45 | -0.23 | 0.22  | -0.34 | -0.45 | -0.28 | -0.16 | -0.12 | -0.04 |       |   |
| GENE840X | 18074_at   | 18074_at   | 1     | -1.32 | -1.64 | -2.64 | -2.32 | -1.83 | -1.55 | -     |       |       |   |
| 2.47     | -1.64      | -0.43      | -0.47 | -0.49 | -0.51 | -0.49 | -0.55 | -0.55 | -0.08 | -0.08 | -0.51 | -0.62 | - |
| 0.55     | -0.68      | -0.71      | -0.64 | -0.39 | -0.13 | -0.28 | -0.32 | -0.23 | -0.23 | 0.05  | -0.12 |       |   |
| GENE839X | 15212_s_at | 15212_s_at | 1     | -1.35 | -1.78 | -2.94 | -2.64 | -2.32 | -1.94 | -     |       |       |   |
| 2.73     | -2.05      | -0.49      | -0.62 | -0.53 | -0.45 | -0.51 | -0.73 | -0.68 | 0.01  | -0.16 | -0.71 | -0.86 | - |
| 0.62     | -0.83      | -0.91      | -0.78 | -0.53 | -0.16 | -0.51 | -0.39 | -0.32 | -0.07 | -0.13 | -0.02 |       |   |
| GENE838X | 12741_at   | 12741_at   | 1     | -1.39 | -2.12 | -3.18 | -3.05 | -2.47 | -2.05 | -     |       |       |   |
| 3.05     | -2.32      | -0.55      | -0.88 | -0.76 | -0.71 | -0.51 | -0.91 | -1.08 | 0.01  | -0.08 | -0.91 | -0.86 | - |
| 0.66     | -0.91      | -1.02      | -0.76 | -0.32 | 0.22  | 0.01  | -0.64 | -0.26 | -0.55 | 0.11  | -0.01 |       |   |
| GENE762X | 16509_at   | 16509_at   | 1     | -1.64 | -2.05 | -2.83 | -2.39 | -2.32 | -2.12 | -     |       |       |   |
| 3.05     | -2.47      | -0.83      | -0.86 | -0.76 | -0.88 | -0.97 | -1.32 | -1.05 | -0.51 | -0.34 | -0.78 | -0.83 | - |
| 0.35     | -0.73      | -1.21      | -0.78 | -0.45 | -0.1  | -0.51 | -0.18 | -0.26 | -0.02 | -0.1  | -0.02 |       |   |
| GENE761X | 18683_s_at | 18683_s_at | 1     | -2.12 | -2.94 | -4.64 | -3.83 | -3.32 | -2.83 | -     |       |       |   |
| 4.05     | -3.18      | -1.18      | -1.64 | -1.25 | -1.47 | -1.43 | -2.12 | -1.59 | -0.15 | -0.12 | -1.15 | -1.08 | - |
| 0.66     | -1.05      | -1.69      | -0.78 | -0.51 | 0.13  | -0.76 | -0.26 | -0.3  | -0.45 | 0     | -0.01 |       |   |

|          |            |            |       |       |       |       |       |       |       |       |       |       |   |
|----------|------------|------------|-------|-------|-------|-------|-------|-------|-------|-------|-------|-------|---|
| GENE843X | 18075_r_at | 18075_r_at | 1     | -0.68 | -1    | -1.69 | -1.43 | -1.55 | -1.25 | -     |       |       |   |
| 1.83     | -1.39      | -0.59      | -0.41 | -0.43 | -0.16 | -0.28 | -0.64 | -0.3  | -0.07 | 0.12  | -0.51 | -0.64 | - |
| 0.37     | -0.41      | -0.94      | -0.32 | -0.07 | 0.09  | -0.1  | -0.25 | -0.15 | -0.23 | -0.01 | 0.04  |       |   |
| GENE842X | 18076_s_at | 18076_s_at | 1     | -0.94 | -1.21 | -2.12 | -1.69 | -1.83 | -1.51 | -     |       |       |   |
| 2.32     | -1.78      | -0.51      | -0.26 | -0.35 | -0.2  | -0.28 | -0.73 | -0.51 | 0.12  | 0.12  | -0.53 | -0.78 | - |
| 0.43     | -0.55      | -1         | -0.57 | -0.28 | -0.15 | -0.34 | -0.32 | -0.18 | -0.15 | -0.05 | 0.04  |       |   |
| GENE768X | 18734_s_at | 18734_s_at | 1     | -1.18 | -1.39 | -3.47 | -2.94 | -2.64 | -2.18 | -     |       |       |   |
| 3.32     | -2.64      | -0.55      | -0.64 | -0.91 | -0.66 | -0.47 | -1.51 | -1.08 | -0.35 | -0.47 | -1.21 | -1.15 | - |
| 0.15     | -0.43      | -1.39      | -0.57 | -0.28 | -0.08 | -0.35 | -0.01 | 0.01  | -0.04 | 0.11  | 0.12  |       |   |
| GENE752X | 14545_at   | 14545_at   | 1     | -1.43 | -1.83 | -3.83 | -2.73 | -2.55 | -2.18 | -     |       |       |   |
| 2.73     | -1.88      | -0.68      | -0.78 | -0.59 | -0.62 | -0.47 | -0.45 | -1.05 | -0.07 | -0.23 | -0.88 | -0.97 | - |
| 0.51     | -0.86      | -1.32      | -0.81 | -0.45 | -0.32 | -0.39 | -0.45 | -0.3  | -0.21 | 0.2   | 0.07  |       |   |
| GENE751X | 19548_at   | 19548_at   | 1     | -2.32 | -2.32 | -4.64 | -3.83 | -2.94 | -2.32 | -     |       |       |   |
| 3.32     | -2.83      | -0.64      | -0.86 | -0.35 | -0.57 | -0.66 | -1.08 | -1.25 | -0.13 | -0.25 | -0.45 | -1.51 | - |
| 0.68     | -1.12      | -1.32      | -1.43 | -0.88 | -0.35 | -0.91 | -0.05 | -0.13 | -0.15 | -0.21 | 0.01  |       |   |
| GENE750X | 16135_at   | 16135_at   | 1     | -1.21 | -1.94 | -2.47 | -2.18 | -2.25 | -1.59 | -     |       |       |   |
| 2.64     | -1.64      | -0.76      | -0.64 | -0.59 | -0.64 | -0.81 | -0.68 | -0.97 | -0.21 | -0.12 | -0.68 | -0.71 | - |
| 0.78     | -0.73      | -1.18      | -0.73 | -0.57 | -0.21 | -0.68 | -0.26 | -0.3  | -0.15 | -0.1  | -0.05 |       |   |
| GENE749X | 15552_at   | 15552_at   | 1     | -1.02 | -2.12 | -2.94 | -2.55 | -2.39 | -2.32 | -     |       |       |   |
| 2.55     | -1.88      | -0.71      | -0.66 | -0.49 | -0.76 | -1.05 | -0.91 | -1    | 0.13  | -0.25 | -0.64 | -0.94 | - |
| 1.12     | -1         | -1.28      | -1    | -0.73 | -0.32 | -0.68 | -0.41 | -0.18 | -0.2  | -0.01 | -0.04 |       |   |
| GENE748X | 18052_s_at | 18052_s_at | 1     | -1.28 | -2.18 | -4.05 | -3.18 | -2.94 | -2    | -     |       |       |   |
| 3.05     | -2.32      | -0.59      | -1.05 | -0.91 | -1.12 | -1.08 | -1.47 | -1.25 | -0.26 | -0.39 | -0.88 | -1.05 | - |
| 0.78     | -0.91      | -1.02      | -1.43 | -0.94 | -0.59 | -0.83 | -0.66 | -0.39 | -0.23 | -0.25 | -0.18 |       |   |
| GENE747X | 16485_s_at | 16485_s_at | 1     | -1.83 | -2.25 | -3.83 | -3.32 | -4.05 | -2.55 | -     |       |       |   |
| 3.18     | -2.64      | -0.78      | -1.18 | -0.97 | -1.05 | -1.08 | -1.59 | -1.28 | -0.15 | -0.37 | -1.05 | -1    | - |
| 0.81     | -1.02      | -1.25      | -1.43 | -1    | -0.41 | -0.66 | -0.49 | -0.41 | -0.21 | -0.15 | -0.32 |       |   |
| GENE741X | 18086_s_at | 18086_s_at | 1     | -1.35 | -1.83 | -2.94 | -2.32 | -2.12 | -1.55 | -     |       |       |   |
| 2.18     | -1.83      | -0.47      | -0.86 | -0.49 | -0.49 | -0.81 | -0.73 | -0.76 | -0.12 | -0.41 | -0.51 | -0.81 | - |
| 0.91     | -0.71      | -0.49      | -0.97 | -0.78 | -0.34 | -0.49 | -0.35 | -0.34 | -0.28 | -0.3  | 0.04  |       |   |
| GENE740X | 18087_s_at | 18087_s_at | 1     | -1.35 | -2.64 | -4.32 | -3.47 | -2.73 | -2.32 | -     |       |       |   |
| 2.73     | -2.39      | -0.73      | -1.25 | -0.68 | -0.97 | -1.18 | -1.15 | -1.25 | -0.12 | -0.53 | -0.71 | -1.25 | - |
| 1.21     | -1.02      | -0.78      | -1.32 | -1.18 | -0.76 | -0.64 | -0.55 | -0.23 | -0.16 | -0.34 | -0.41 |       |   |
| GENE739X | 12135_at   | 12135_at   | 1     | -2.18 | -2.64 | -5.05 | -4.64 | -3.05 | -2.94 | -     |       |       |   |
| 3.64     | -3.32      | -1.02      | -1.59 | -0.91 | -1.32 | -1.02 | -2.05 | -1.69 | -0.34 | -0.32 | -1.05 | -1.32 | - |
| 1.21     | -1.88      | -1.59      | -1.55 | -1.59 | -0.51 | -1.08 | -1.47 | -0.62 | -0.59 | -0.35 | -0.12 |       |   |
| GENE760X | 16497_at   | 16497_at   | 1     | -1.02 | -2.05 | -2.55 | -2.55 | -2.18 | -1.69 | -     |       |       |   |
| 2.05     | -1.64      | -0.68      | -0.71 | -0.83 | -1.05 | -1.02 | -0.68 | -1    | -0.2  | -0.55 | -0.59 | -0.68 | - |
| 0.49     | -0.51      | -0.91      | -0.78 | -0.49 | -0.23 | -0.71 | 0.02  | -0.35 | 0.09  | 0.08  | -0.2  |       |   |
| GENE759X | 15144_s_at | 15144_s_at | 1     | -2.18 | -3.18 | -4.05 | -4.05 | -3.47 | -2.73 | -     |       |       |   |
| 3.47     | -2.55      | -0.94      | -1.05 | -1.25 | -1.32 | -1    | -1.51 | -1.15 | -0.57 | -0.53 | -1.25 | -0.97 | - |
| 1.64     | -1.12      | -1.64      | -0.59 | -0.16 | -0.15 | -0.78 | -0.1  | -0.08 | -0.01 | 0.01  | -0.35 |       |   |
| GENE755X | 15990_at   | 15990_at   | 1     | -2.55 | -2.39 | -4.05 | -3.83 | -2.73 | -2.39 | -     |       |       |   |
| 3.05     | -2.47      | -0.35      | -0.97 | -0.88 | -1.02 | -0.91 | -1.18 | -1.15 | -0.47 | -0.73 | -1    | -0.91 | - |
| 0.62     | -1.12      | -0.83      | -1.05 | -0.62 | -0.15 | -0.51 | -0.55 | -0.39 | -0.23 | 0.07  | -0.05 |       |   |
| GENE753X | 15644_at   | 15644_at   | 1     | -2.55 | -2.83 | -4.32 | -3.64 | -2.94 | -2.94 | -     |       |       |   |
| 3.18     | -2.47      | -0.39      | -0.86 | -0.55 | -1.05 | -1.12 | -1.18 | -0.88 | -0.28 | -0.59 | -0.49 | -0.41 | - |
| 1.05     | -0.94      | -0.88      | -1.28 | -1.18 | -0.49 | -0.47 | -0.1  | -0.34 | -0.2  | 0.04  | -0.13 |       |   |
| GENE758X | 13150_at   | 13150_at   | 1     | -1.39 | -1.73 | -2.32 | -2.18 | -1.78 | -1.64 | -     |       |       |   |
| 1.83     | -1.73      | -0.76      | -0.76 | -0.81 | -0.47 | -0.59 | -0.71 | -0.86 | -0.12 | -0.28 | -0.68 | -0.51 | - |
| 0.66     | -0.73      | -0.78      | -0.57 | -0.51 | -0.12 | -0.21 | -0.2  | -0.12 | -0.35 | 0.07  | -0.12 |       |   |
| GENE757X | 18081_at   | 18081_at   | 1     | -1.39 | -2.25 | -2.83 | -2.47 | -2.12 | -1.73 | -     |       |       |   |
| 2.25     | -1.88      | -0.45      | -0.68 | -0.62 | -0.81 | -0.86 | -0.62 | -1    | -0.12 | -0.28 | -0.68 | -0.76 | - |
| 0.76     | -0.62      | -0.71      | -0.88 | -0.91 | -0.32 | -0.51 | -0.05 | -0.18 | -0.13 | -0.01 | -0.05 |       |   |
| GENE756X | 15182_at   | 15182_at   | 1     | -2.05 | -2.73 | -3.64 | -3.47 | -2.73 | -2.39 | -     |       |       |   |
| 2.94     | -2.83      | -0.68      | -0.94 | -0.83 | -1.12 | -0.83 | -1.21 | -1.39 | -0.21 | -0.28 | -0.88 | -0.97 | - |
| 0.66     | -1.35      | -1.21      | -1.35 | -1.05 | -0.64 | -0.78 | -0.35 | -0.2  | -0.02 | -0.23 | -0.1  |       |   |

|          |            |            |       |       |       |       |       |       |       |       |       |       |   |
|----------|------------|------------|-------|-------|-------|-------|-------|-------|-------|-------|-------|-------|---|
| GENE746X | 16018_s_at | 16018_s_at | 1     | -1.94 | -1.94 | -3.05 | -2.64 | -2.55 | -2.25 | -     |       |       |   |
| 2.73     | -2.18      | -0.66      | -0.57 | -0.35 | -0.73 | -0.71 | -0.97 | -0.78 | -0.35 | -0.51 | -0.91 | -0.62 | - |
| 0.81     | -1         | -1.08      | -1    | -0.73 | -0.34 | -0.83 | -0.34 | -0.3  | -0.13 | 0.16  | 0.01  |       |   |
| GENE745X | 17394_s_at | 17394_s_at | 1     | -1.94 | -2.25 | -3.32 | -2.94 | -2.64 | -2.32 | -     |       |       |   |
| 2.83     | -2.47      | -0.71      | -0.81 | -0.78 | -0.78 | -0.78 | -1    | -1.08 | -0.26 | -0.41 | -0.88 | -0.91 | - |
| 0.45     | -1.02      | -1.21      | -1    | -0.78 | -0.23 | -0.71 | -0.68 | -0.55 | -0.34 | -0.07 | -0.01 |       |   |
| GENE744X | 17420_at   | 17420_at   | 1     | -2.18 | -2.55 | -3.83 | -3.64 | -3.18 | -2.83 | -     |       |       |   |
| 3.05     | -2.73      | -0.88      | -1.02 | -0.88 | -1    | -0.97 | -1.21 | -1.21 | -0.28 | -0.41 | -0.97 | -0.91 | - |
| 0.68     | -1.18      | -1.47      | -1.35 | -0.91 | -0.32 | -0.86 | -0.43 | -0.3  | -0.15 | 0.01  | -0.04 |       |   |
| GENE125X | 12785_at   | 12785_at   | 1     | -1.69 | -2.55 | -3.32 | -3.32 | -3.05 | -2.83 | -     |       |       |   |
| 2.94     | -2.73      | -1.18      | -0.97 | -0.86 | -1.15 | -1.15 | -1.25 | -1.08 | -0.39 | -0.53 | -0.76 | -0.76 | - |
| 0.88     | -1.25      | -1.18      | -1.28 | -0.94 | -0.41 | -0.71 | -0.32 | -0.32 | -0.23 | -0.13 | -0.08 |       |   |
| GENE124X | 16034_at   | 16034_at   | 1     | -2.25 | -2.47 | -3.64 | -3.47 | -3.18 | -2.83 | -     |       |       |   |
| 2.83     | -2.55      | -0.83      | -0.97 | -0.83 | -1.08 | -1.05 | -1.51 | -1.08 | -0.41 | -0.71 | -0.88 | -0.88 | - |
| 0.97     | -1.15      | -1.21      | -1.59 | -1.43 | -0.66 | -0.81 | -0.21 | -0.39 | -0.16 | -0.13 | -0.02 |       |   |
| GENE123X | 12745_at   | 12745_at   | 1     | -2.64 | -3.05 | -4.32 | -3.83 | -3.64 | -3.05 | -     |       |       |   |
| 3.64     | -3.05      | -0.73      | -1.02 | -0.71 | -1.28 | -1.28 | -1.69 | -1.28 | -0.35 | -0.66 | -1.12 | -0.97 | - |
| 0.91     | -1.32      | -1.69      | -1.59 | -1.28 | -0.32 | -0.68 | -0.2  | -0.37 | -0.28 | 0.08  | 0.11  |       |   |
| GENE837X | 13020_at   | 13020_at   | 1     | -1.08 | -1.28 | -2.47 | -1.94 | -2.32 | -1.83 | -     |       |       |   |
| 2.47     | -2.39      | -0.51      | -0.39 | -0.37 | -0.43 | -0.86 | -0.91 | -0.62 | 0     | -0.16 | -0.81 | -0.32 | - |
| 0.57     | -0.68      | -1.02      | -0.86 | -0.64 | -0.41 | -0.35 | -0.45 | -0.71 | -0.41 | -0.05 | -0.07 |       |   |
| GENE836X | 20640_s_at | 20640_s_at | 1     | -1.64 | -2    | -3.32 | -2.73 | -2.73 | -2.39 | -     |       |       |   |
| 3.18     | -2.55      | -0.76      | -0.62 | -0.43 | -0.76 | -0.73 | -1.05 | -0.91 | -0.15 | -0.05 | -1.47 | -0.81 | - |
| 0.68     | -0.81      | -1.21      | -0.97 | -0.53 | 0     | -0.68 | -0.55 | -0.41 | -0.15 | 0.08  | 0.26  |       |   |
| GENE835X | 16124_s_at | 16124_s_at | 1     | -2    | -2.32 | -3.64 | -2.64 | -3.18 | -2.25 | -     |       |       |   |
| 3.64     | -2.94      | -0.81      | -1.15 | -0.66 | -0.66 | -0.73 | -1.21 | -1.25 | 0.16  | -0.18 | -1.05 | -1.18 | - |
| 1.08     | -1.15      | -1.51      | -1.18 | -0.81 | -0.71 | -1.05 | -0.55 | -0.16 | -0.1  | -0.2  | -0.05 |       |   |
| GENE808X | 13142_at   | 13142_at   | 1     | -1.21 | -1.39 | -2.32 | -1.64 | -2    | -1.94 | -     |       |       |   |
| 2.47     | -1.73      | -0.86      | -0.59 | -0.47 | -0.57 | -0.66 | -0.71 | -0.66 | -0.23 | -0.1  | -0.47 | -0.53 | - |
| 0.35     | -0.57      | -1.08      | -0.94 | -0.76 | -0.43 | -0.47 | -0.15 | -0.08 | -0.1  | -0.05 | -0.01 |       |   |
| GENE807X | 16443_at   | 16443_at   | 1     | -1.64 | -1.59 | -2.83 | -2.25 | -2.32 | -2.05 | -     |       |       |   |
| 2.32     | -1.94      | -0.83      | -0.43 | -0.49 | -0.59 | -0.59 | -0.78 | -0.71 | -0.37 | -0.32 | -0.55 | -0.55 | - |
| 0.39     | -0.62      | -1.12      | -0.94 | -0.73 | -0.41 | -0.28 | -0.08 | -0.23 | -0.12 | 0.04  | -0.08 |       |   |
| GENE806X | 18677_at   | 18677_at   | 1     | -1.64 | -1.94 | -2.94 | -2.55 | -2.55 | -2    | -     |       |       |   |
| 2.94     | -2.25      | -0.78      | -0.37 | -0.62 | -0.83 | -0.97 | -0.94 | -0.73 | -0.28 | -0.45 | -0.73 | -0.59 | - |
| 0.32     | -0.62      | -1.25      | -0.91 | -0.49 | -0.3  | -0.37 | 0.11  | -0.12 | -0.1  | 0.29  | -0.01 |       |   |
| GENE805X | 12336_at   | 12336_at   | 1     | -1.55 | -1.78 | -3.05 | -2.47 | -2.73 | -2.47 | -     |       |       |   |
| 2.83     | -2.83      | -0.83      | -0.91 | -0.53 | -0.71 | -0.68 | -1.05 | -1    | -0.12 | -0.3  | -0.88 | -1.08 | - |
| 0.1      | -0.53      | -1.94      | -0.94 | -0.73 | -0.41 | -0.81 | 0.16  | 0.16  | -0.26 | 0.15  | 0.45  |       |   |
| GENE804X | 18276_at   | 18276_at   | 1     | -1.47 | -1.94 | -2.55 | -2.47 | -3.18 | -2.73 | -     |       |       |   |
| 2.55     | -2.05      | -1.21      | -0.73 | -0.45 | -1.12 | -1.25 | -1.12 | -0.88 | -0.21 | -0.76 | -0.57 | -0.83 | - |
| 0.66     | -0.94      | -1.73      | -1.02 | -0.88 | -0.43 | -1.18 | -0.51 | -0.32 | -0.23 | -0.05 | 0.04  |       |   |
| GENE803X | 16517_at   | 16517_at   | 1     | -2.18 | -1.73 | -2.94 | -2.83 | -3.64 | -2.39 | -     |       |       |   |
| 2.64     | -2.25      | -0.68      | -0.43 | -0.47 | -0.76 | -0.88 | -0.88 | -0.81 | -0.25 | -0.71 | -0.62 | -0.83 | - |
| 0.68     | -1.05      | -1.47      | -0.97 | -0.62 | -0.08 | -0.71 | -0.13 | -0.39 | -0.15 | 0.01  | 0.04  |       |   |
| GENE183X | 17526_s_at | 17526_s_at | 1     | -1.73 | -1.83 | -2.64 | -2    | -2.73 | -2    | -     |       |       |   |
| 2.73     | -2.39      | -0.76      | -0.59 | -0.26 | -0.71 | -0.91 | -1.28 | -0.57 | -0.02 | -0.32 | -0.35 | -0.47 | - |
| 1.05     | -0.94      | -0.91      | -1.15 | -1.21 | -0.55 | -0.57 | 0.08  | -0.25 | -0.07 | -0.2  | 0     |       |   |
| GENE130X | 13678_at   | 13678_at   | 1     | -2.25 | -3.47 | -4.64 | -4.32 | -4.64 | -3.83 | -     |       |       |   |
| 4.32     | -3.32      | -1.35      | -1.18 | -1.08 | -1.47 | -1.51 | -2.18 | -1.69 | -0.2  | -0.28 | -1.18 | -1.15 | - |
| 1.39     | -1.39      | -2.18      | -2.12 | -1.88 | -1.12 | -1    | -0.12 | -0.1  | -0.01 | -0.18 | -0.23 |       |   |
| GENE129X | 14600_at   | 14600_at   | 1     | -2.83 | -3.64 | -5.05 | -5.05 | -5.64 | -4.32 | -     |       |       |   |
| 4.64     | -4.05      | -1.39      | -1.51 | -0.91 | -1.51 | -1.43 | -2    | -1.83 | -0.16 | -0.39 | -1.21 | -1.28 | - |
| 1.51     | -1.73      | -1.88      | -2.64 | -2.55 | -1.21 | -1.35 | -0.62 | -0.39 | -0.15 | -0.59 | -0.04 |       |   |
| GENE458X | 19653_g_at | 19653_g_at | 1     | -2.64 | -2.73 | -2.55 | -2.12 | -2.18 | -1.47 | -     |       |       |   |
| 3.64     | -3.64      | -0.37      | -0.64 | -0.23 | -1.05 | -1.15 | -2.25 | -0.64 | -1.47 | -1.47 | -0.94 | -1.83 | - |
| 1.25     | -1.47      | -1.47      | -1.55 | -1.55 | -0.66 | -0.59 | -0.07 | -0.3  | 0     | 0.27  | 0.13  |       |   |

|          |            |            |       |       |       |       |       |       |       |       |       |       |   |
|----------|------------|------------|-------|-------|-------|-------|-------|-------|-------|-------|-------|-------|---|
| GENE459X | 12886_s_at | 12886_s_at | 1     | -1.18 | -1.55 | -1.35 | -1.43 | -1.21 | -0.66 | -     |       |       |   |
| 2.32     | -1.78      | -0.15      | -0.23 | -0.26 | -0.39 | -1    | -1.28 | -0.57 | 0.04  | -0.57 | -0.53 | -0.49 | - |
| 0.49     | -0.37      | -0.62      | -0.53 | -0.59 | -0.2  | -0.41 | -0.23 | -0.32 | -0.02 | 0.41  | 0.27  |       |   |
| GENE455X | 19431_s_at | 19431_s_at | 1     | -2.32 | -2.12 | -2.25 | -2.39 | -1.69 | -1.43 | -     |       |       |   |
| 3.47     | -3.05      | -0.02      | -0.62 | -0.25 | -1.02 | -1    | -1.64 | -1.05 | -0.2  | -0.73 | -0.39 | -1.08 | - |
| 0.26     | -0.57      | -0.64      | -0.34 | -0.32 | -0.12 | -0.91 | 0.42  | 0.29  | 0.37  | -0.07 | -0.05 |       |   |
| GENE457X | 15776_at   | 15776_at   | 1     | -1.43 | -1.08 | -1.47 | -1.18 | -1.15 | -1.05 | -     |       |       |   |
| 2.05     | -1.94      | -0.32      | -0.37 | -0.18 | -0.71 | -0.43 | -0.57 | -0.81 | -0.3  | -0.26 | -0.41 | -0.3  | - |
| 0.01     | -0.3       | -0.51      | -0.73 | -0.35 | -0.3  | -0.18 | 0.42  | 0.26  | 0.17  | 0.04  | -0.01 |       |   |
| GENE456X | 15642_at   | 15642_at   | 1     | -1.43 | -1.32 | -1.83 | -1.12 | -1.35 | -1.25 | -     |       |       |   |
| 2.47     | -1.94      | -0.34      | 0     | -0.08 | -0.55 | -0.59 | -0.81 | -0.57 | -0.59 | -0.71 | -0.35 | -0.81 | - |
| 0.53     | -0.49      | -0.59      | -0.76 | -0.57 | -0.47 | -0.07 | 0.21  | 0.05  | 0.08  | -0.02 | -0.16 |       |   |
| GENE454X | 13144_at   | 13144_at   | 1     | -2.73 | -2.25 | -3.18 | -2.55 | -2.12 | -2.39 | -     |       |       |   |
| 4.32     | -2.64      | -0.1       | -0.94 | -0.39 | -0.76 | -1    | -1.59 | -1.18 | -0.04 | 0.02  | -0.34 | -0.62 | - |
| 0.68     | -1.15      | -1.64      | -1.05 | -0.71 | -0.57 | 0.11  | 0     | -0.16 | -0.34 | 0.15  | -0.35 |       |   |
| GENE453X | 16017_at   | 16017_at   | 1     | -2.55 | -2.73 | -6.64 | -4.05 | -2.94 | -2.73 | -     |       |       |   |
| 6.64     | -3.64      | -1.05      | -1.78 | -1.15 | -2.12 | -2    | -2.83 | -2.18 | -1.15 | -0.94 | -1.39 | -1.47 | - |
| 0.78     | -1.21      | -1.69      | -1.21 | -0.91 | -0.81 | -0.68 | 0.08  | -0.05 | -0.01 | 0.04  | -0.18 |       |   |
| GENE452X | 20449_at   | 20449_at   | 1     | -1.94 | -3.32 | -2.55 | -2.18 | -2.05 | -1.88 | -     |       |       |   |
| 3.64     | -3.64      | -0.25      | -1.02 | -0.34 | -1    | -0.51 | -1.64 | -1.78 | -0.1  | -0.07 | -0.37 | -0.53 | - |
| 0.73     | -1         | -0.43      | -1.32 | -0.64 | -0.3  | -0.05 | 0.49  | -0.12 | -0.25 | 0.02  | 0.13  |       |   |
| GENE451X | 13459_at   | 13459_at   | 1     | -1.64 | -2.64 | -3.32 | -2.32 | -2.94 | -1.73 | -     |       |       |   |
| 3.64     | -3.47      | -0.59      | -0.73 | -0.1  | -0.59 | -1.21 | -1.12 | -2    | 0     | -0.64 | -0.16 | -0.21 | - |
| 0.57     | -0.68      | -0.35      | -1.83 | -1.59 | -0.97 | -0.94 | -0.53 | -0.26 | 0.05  | -0.23 | 0.35  |       |   |
| GENE864X | 17505_s_at | 17505_s_at | 1     | -0.41 | -0.78 | -1.78 | -1.51 | -1.25 | -0.55 | -     |       |       |   |
| 1.32     | -1.12      | -0.18      | -0.71 | -0.35 | -0.62 | -0.71 | -0.86 | -0.97 | -0.2  | -0.28 | -0.39 | -0.62 | - |
| 0.23     | -0.13      | -0.41      | -0.51 | -0.39 | -0.32 | -0.62 | -0.01 | -0.1  | 0.27  | -0.08 | 0.11  |       |   |
| GENE863X | 17054_s_at | 17054_s_at | 1     | -1.15 | -1.28 | -3.64 | -3.47 | -2.55 | -2    | -     |       |       |   |
| 3.18     | -2.47      | -0.81      | -1.69 | -0.68 | -2.18 | -2.73 | -1.73 | -2.12 | -0.51 | -1.28 | -0.97 | -0.78 | - |
| 0.64     | -0.2       | -1.08      | -0.49 | -0.21 | 0.42  | -0.71 | 0.11  | -0.49 | 0.35  | 0.33  | 0.77  |       |   |
| GENE10X  | 13319_at   | 13319_at   | 1     | -0.78 | -0.62 | -1.47 | -1.47 | -1.15 | -1.51 | -     |       |       |   |
| 1.59     | -1.32      | -0.64      | -0.3  | -0.47 | -0.39 | -1.21 | -0.94 | -1    | -0.51 | -0.64 | -0.76 | -0.3  | - |
| 0.18     | 0.12       | -0.71      | -1.08 | -1.08 | -0.45 | -1.12 | 0.34  | -0.3  | 0.44  | -0.23 | -0.12 |       |   |
| GENE9X   | 17566_at   | 17566_at   | 1     | -1.78 | -0.94 | -3.05 | -1.78 | -2.73 | -2    | -     |       |       |   |
| 2.32     | -2.64      | -1         | -0.88 | -0.47 | 0.09  | -1    | -1.51 | -1    | -0.41 | -1.51 | -0.88 | -1.28 | - |
| 0.13     | -0.05      | -1.15      | -0.23 | -0.57 | -0.59 | -1.64 | 0.09  | -0.47 | 0.51  | -0.88 | 0.18  |       |   |
| GENE915X | 13024_at   | 13024_at   | 1     | -1.39 | -0.91 | -1.51 | -1.83 | -1.59 | -1.64 | -     |       |       |   |
| 0.76     | -1.12      | -0.51      | -0.86 | -0.1  | -0.47 | -0.1  | -0.45 | -1.08 | 0.01  | 0.2   | -0.07 | -0.2  | - |
| 0.53     | -0.45      | -0.51      | -0.49 | -0.41 | -0.37 | -0.32 | 0.17  | 0.31  | 0.22  | -0.05 | -0.13 |       |   |
| GENE914X | 18035_at   | 18035_at   | 1     | -3.47 | -1.39 | -4.05 | -2.83 | -2.73 | -2.12 | -     |       |       |   |
| 2.94     | -3.18      | -0.81      | -1.08 | -0.73 | -0.47 | -0.49 | -1.83 | -3.05 | -0.21 | -0.18 | -0.45 | -0.13 | - |
| 0.45     | -1.05      | 0.15       | -1.47 | -1.25 | -0.41 | -1.69 | 0.18  | 0.4   | 0.45  | -1.21 | -0.71 |       |   |
| GENE83X  | 15502_at   | 15502_at   | 1     | -2.55 | -1.43 | -2.83 | -2.32 | -1.64 | -1.83 | -     |       |       |   |
| 1.94     | -2.94      | -0.86      | -2.25 | -0.71 | -0.94 | -1.21 | -1.35 | -2.39 | -0.37 | -0.12 | -0.86 | -0.91 | - |
| 0.43     | -0.62      | -0.68      | -1.51 | -0.97 | -0.68 | -0.57 | -0.08 | -0.18 | 0.09  | -0.32 | 0.22  |       |   |
| GENE82X  | 18023_s_at | 18023_s_at | 1     | -2.05 | -2.39 | -3.83 | -2.55 | -1.88 | -2    | -     |       |       |   |
| 2.39     | -3.18      | -0.59      | -2.18 | -1.05 | -0.91 | -0.97 | -1.47 | -2.32 | -0.66 | -0.16 | -1    | -1.15 | - |
| 0.81     | -1.32      | -0.47      | -1.18 | -1.15 | -0.86 | -0.35 | -0.57 | -0.32 | -0.23 | -0.45 | -0.18 |       |   |
| GENE81X  | 14859_s_at | 14859_s_at | 1     | -2    | -1.21 | -2.32 | -2.25 | -2    | -2.12 | -     |       |       |   |
| 1.83     | -2.12      | -0.78      | -1.64 | -0.71 | -0.51 | -0.12 | -1.59 | -1.64 | -0.2  | 0.21  | -1.12 | -0.66 | - |
| 0.71     | -0.55      | -1         | -0.97 | -0.91 | -0.37 | -0.35 | -0.28 | -0.43 | -0.51 | -0.3  | -0.1  |       |   |
| GENE80X  | 18297_at   | 18297_at   | 1     | -1.88 | -0.91 | -1.51 | -1.59 | -1.47 | -1.35 | -     |       |       |   |
| 1.25     | -1.55      | -0.3       | -0.88 | -0.35 | -0.55 | -0.57 | -0.86 | -0.97 | -0.28 | -0.41 | -0.55 | -1.02 | - |
| 0.39     | -0.94      | -0.45      | -0.91 | -1.02 | -0.43 | -0.57 | -0.16 | -0.16 | 0.13  | -0.41 | -0.13 |       |   |
| GENE79X  | 13614_at   | 13614_at   | 1     | -2.39 | -1.69 | -2.18 | -2.18 | -1.94 | -2.05 | -     |       |       |   |
| 1.94     | -2.73      | -0.51      | -1.32 | -0.45 | -0.88 | -0.57 | -1.32 | -1.32 | -0.21 | -0.32 | -0.55 | -0.81 | - |
| 0.91     | -1.32      | -0.86      | -2    | -1.73 | -0.94 | -1.21 | -0.47 | -0.35 | -0.04 | -0.47 | 0.08  |       |   |

|          |            |            |       |       |       |       |       |       |       |       |       |       |       |    |
|----------|------------|------------|-------|-------|-------|-------|-------|-------|-------|-------|-------|-------|-------|----|
| GENE78X  | 14528_at   | 14528_at   | 1     | -2.05 | -1.25 | -2.39 | -2.32 | -1.69 | -1.73 | -     |       |       |       |    |
|          | 1.64       | -2.12      | -0.3  | -1.18 | -0.43 | -0.64 | -0.64 | -0.94 | -1.25 | -0.02 | -0.45 | -0.53 | -1.35 | -  |
|          | 1.28       | -1.28      | -0.57 | -1.51 | -1.25 | -0.57 | -0.81 | -0.66 | -0.55 | -0.3  | -0.71 | 0.09  |       |    |
| GENE77X  | 15676_at   | 15676_at   | 1     | -1.73 | -1.32 | -2.32 | -1.69 | -1.69 | -1.69 | -     |       |       |       |    |
|          | 1.78       | -1.94      | -0.21 | -1.15 | -0.59 | -0.51 | -0.55 | -0.83 | -1.25 | 0.04  | -0.15 | -0.68 | -1.18 | -  |
|          | 1.21       | -1.43      | -0.97 | -1.64 | -1.25 | -0.68 | -0.94 | -0.43 | -0.37 | -0.08 | -0.21 | 0.17  |       |    |
| GENE76X  | 16650_s_at | 16650_s_at | 1     | -2.73 | -2    | -2.83 | -3.18 | -2    | -2.05 | -2    |       |       |       |    |
|          | 0.68       | -1.12      | -0.43 | -1.39 | -1.25 | -0.49 | -0.53 | -0.15 | -0.18 | -0.01 | -0.04 | 0.25  |       |    |
| GENE75X  | 17975_at   | 17975_at   | 1     | -3.47 | -2.55 | -4.32 | -5.05 | -3.18 | -2.83 | -     |       |       |       |    |
|          | 3.47       | -3.47      | -0.94 | -2.12 | -0.41 | -0.66 | -0.94 | -2.12 | -2.25 | -0.02 | -0.15 | -1.12 | -1.21 | -  |
|          | 1.83       | -2.39      | -1.08 | -2.55 | -2.39 | -0.78 | -0.57 | -0.35 | -0.47 | -0.32 | -0.18 | 0.23  |       |    |
| GENE74X  | 18742_f_at | 18742_f_at | 1     | -2.73 | -2.12 | -4.05 | -3.32 | -2.83 | -3.18 | -     |       |       |       |    |
|          | 2.39       | -2.55      | -0.26 | -1.64 | -0.59 | -0.88 | -0.68 | -1.32 | -2.25 | -0.15 | 0.13  | -1.73 | -1.43 | -  |
|          | 1.21       | -2.25      | -0.53 | -1.83 | -1.59 | -0.51 | -0.73 | -0.41 | -0.26 | -0.16 | -0.21 | 0.13  |       |    |
| GENE230X | 16495_at   | 16495_at   | 1     | -0.86 | -1.12 | -1.59 | -0.94 | -1.51 | -1.47 | -     |       |       |       |    |
|          | 0.97       | -1.18      | -0.78 | -0.47 | 0.07  | -0.18 | -0.39 | -0.35 | -0.73 | -0.15 | -0.49 | -0.28 | -0.43 | -  |
|          | 0.55       | -0.32      | -0.76 | -0.34 | -0.49 | -0.35 | -0.73 | 0.22  | 0.04  | 0.22  | -0.37 | 0.02  |       |    |
| GENE229X | 20187_at   | 20187_at   | 1     | -2.39 | -2.05 | -1.94 | -1.88 | -2.18 | -2.25 | -     |       |       |       |    |
|          | 1.25       | -2.05      | -0.76 | -0.88 | -0.3  | -0.43 | -0.25 | -0.68 | -1.43 | 0.42  | -0.32 | -0.47 | -0.76 | -  |
|          | 0.94       | -0.59      | -1    | -1.08 | -1.08 | -0.76 | -1.39 | -0.12 | 0.13  | 0.15  | -0.55 | -0.1  |       |    |
| GENE228X | 15467_at   | 15467_at   | 1     | -1.69 | -2.39 | -1.88 | -1.47 | -2.05 | -2.18 | -     |       |       |       |    |
|          | 1.39       | -2.73      | -1.35 | -1.64 | -0.37 | -0.28 | -1.05 | -0.76 | -1.43 | -0.37 | -0.3  | -0.51 | -0.88 | -  |
|          | 0.66       | -1.15      | -0.73 | -1.25 | -1.51 | -0.97 | -0.91 | -0.51 | -0.23 | -0.18 | -0.62 | -0.16 |       |    |
| GENE38X  | 13254_at   | 13254_at   | 1     | -0.83 | -0.86 | -1.64 | -1.32 | -2    | -1.69 | -     |       |       |       |    |
|          | 1.28       | -1.32      | -0.83 | -1.25 | -0.55 | -0.78 | -0.91 | -1.08 | -1.51 | -0.05 | 0.15  | -0.59 | -0.57 | -  |
|          | 0.68       | -0.3       | -1.02 | -0.71 | -0.35 | -0.13 | -0.68 | 0.09  | 0.21  | 0.05  | -0.28 | -0.26 |       |    |
| GENE37X  | 18924_at   | 18924_at   | 1     | -2.25 | -0.68 | -1.64 | -2    | -2.47 | -2.18 | -     |       |       |       |    |
|          | 1.39       | -1.88      | -1.18 | -1.43 | -0.73 | -0.86 | -0.59 | -1.83 | -1.51 | -0.76 | -0.2  | -0.73 | -1.35 | -  |
|          | 1.28       | -0.97      | -1.18 | -1.08 | -1.43 | -0.57 | -0.59 | -0.2  | 0.28  | 0.65  | -0.62 | -0.78 |       |    |
| GENE982X | 18339_at   | 18339_at   | 1     | -0.71 | -0.71 | -1.47 | -1.47 | -1.15 | -1.25 | -     |       |       |       |    |
|          | 1.73       | -1.83      | -0.35 | -1.12 | -0.3  | -0.51 | -0.2  | -1.64 | -0.97 | -0.2  | 0.25  | -0.39 | 0     | -  |
|          | 0.25       | 0.05       | 0.23  | -0.66 | -0.66 | 0.04  | 0.07  | 0.11  | 0.16  | 0.32  | -0.3  | 0.2   |       |    |
| GENE981X | 19870_s_at | 19870_s_at | 1     | -1.83 | -0.64 | -1.64 | -2.25 | -1.35 | -1.83 | -     |       |       |       |    |
|          | 1.94       | -2.47      | -0.34 | -2.47 | -0.45 | -0.91 | -0.55 | -1.94 | -1.32 | -0.18 | -0.28 | -0.41 | -0.62 | -1 |
|          |            | -0.64      | -0.45 | -1.21 | -1.05 | -0.68 | -0.39 | 0.2   | -0.08 | 0.22  | -0.47 | -0.15 |       |    |
| GENE980X | 16052_at   | 16052_at   | 1     | -0.55 | -1.08 | -1.39 | -1.12 | -1.12 | -1.55 | -     |       |       |       |    |
|          | 1.83       | -1.39      | -0.81 | -0.91 | -0.66 | -1.15 | -0.71 | -1.88 | -1.69 | -0.39 | 0     | -0.66 | -0.51 | -  |
|          | 0.34       | -0.32      | -1.15 | -0.57 | -0.15 | -0.76 | 0.33  | 0.59  | 0.35  | -0.18 | 0.34  | -0.21 |       |    |
| GENE979X | 13085_i_at | 13085_i_at | 1     | -2.05 | -1.51 | -2.94 | -2.25 | -2.83 | -3.18 | -     |       |       |       |    |
|          | 2.64       | -2.18      | -0.32 | -2.18 | -1.18 | -1.64 | -1.47 | -1.94 | -1.64 | 0.02  | -0.26 | -0.86 | -0.51 | -  |
|          | 0.1        | -0.28      | -0.86 | -1.02 | -1.12 | -1.39 | -0.12 | -0.32 | -0.08 | -0.21 | 0.7   | 0.21  |       |    |
| GENE978X | 13086_r_at | 13086_r_at | 1     | -1.18 | -1.02 | -2.73 | -2.83 | -2.94 | -3.32 | -     |       |       |       |    |
|          | 3.18       | -2.32      | -0.81 | -1.43 | -1.32 | -1.32 | -1.28 | -2.32 | -1.69 | 0.21  | 0.37  | -1.21 | -0.62 | -  |
|          | 0.08       | -0.28      | -1.15 | -0.41 | -0.39 | -0.81 | -0.18 | 0.07  | 0.23  | -0.18 | 0.9   | 0.17  |       |    |
| GENE968X | 19224_at   | 19224_at   | 1     | -1.02 | -1.08 | -0.43 | -0.91 | -0.91 | -0.91 | -     |       |       |       |    |
|          | 1.02       | -1.21      | -0.39 | -0.35 | -0.28 | -0.32 | -0.35 | -0.86 | -0.53 | -0.32 | -0.08 | -0.37 | -0.49 | -  |
|          | 0.23       | -0.32      | -0.71 | -0.37 | -0.16 | -0.1  | -0.26 | -0.47 | -0.18 | -0.3  | -0.05 | -0.07 |       |    |
| GENE967X | 18265_at   | 18265_at   | 1     | -2.94 | -2.64 | -2.25 | -2.25 | -2.05 | -3.64 | -     |       |       |       |    |
|          | 3.83       | -4.32      | -1    | -0.81 | -1.47 | -1.21 | -1.21 | -3.64 | -1    | -1.05 | -1.05 | -1.69 | -1.69 | -  |
|          | 1.08       | -1.35      | -2.05 | -1.21 | -0.97 | -0.78 | 0.49  | -0.91 | -0.71 | -1    | -0.59 | -0.88 |       |    |
| GENE969X | 12223_s_at | 12223_s_at | 1     | -1.08 | -1    | -0.86 | -1.21 | -1    | -1.51 | -     |       |       |       |    |
|          | 1.64       | -2.47      | -0.16 | -0.83 | -0.41 | -0.73 | -0.55 | -1.59 | -0.91 | -0.2  | -0.51 | -0.43 | -0.51 | -  |
|          | 0.34       | -0.71      | -0.28 | -0.3  | -0.01 | 0.07  | 0.26  | -0.57 | -0.41 | -0.45 | -0.3  | -0.37 |       |    |
| GENE966X | 16906_at   | 16906_at   | 1     | -1.21 | -0.64 | -0.68 | -0.66 | -0.83 | -1.21 | -     |       |       |       |    |
|          | 1.05       | -1.73      | -0.37 | -0.47 | -0.3  | -0.25 | -0.41 | -1.02 | -0.73 | -0.21 | -0.49 | -0.62 | -0.49 | -  |
|          | 0.59       | -0.49      | -0.64 | -0.39 | -0.39 | -0.3  | -0.15 | -0.12 | -0.25 | -0.18 | -0.25 | -0.18 |       |    |

|          |            |            |       |       |       |       |       |       |       |       |       |       |    |
|----------|------------|------------|-------|-------|-------|-------|-------|-------|-------|-------|-------|-------|----|
| GENE965X | 17416_at   | 17416_at   | 1     | -1.55 | -1.12 | -0.62 | -1.08 | -1.28 | -1.59 | -     |       |       |    |
| 1.43     | -2.12      | -0.18      | -1    | -0.68 | -0.73 | -0.57 | -1.78 | -1.15 | -0.26 | -0.47 | -0.66 | -0.83 | -  |
| 0.53     | -0.43      | -0.68      | -0.25 | -0.35 | -0.34 | -0.53 | -0.1  | -0.15 | -0.21 | -0.2  | -0.21 |       |    |
| GENE963X | 13114_at   | 13114_at   | 1     | -3.47 | -1.55 | -1.83 | -2.12 | -2.83 | -3.83 | -     |       |       |    |
| 2.64     | -3.64      | -0.91      | -1.55 | -0.97 | -1.83 | -1.83 | -2.55 | -1.83 | -1.05 | -1.15 | -0.78 | -1.21 | -  |
| 1.15     | -0.88      | -1.02      | -0.81 | -0.71 | -0.37 | 0.09  | -0.07 | -0.16 | -0.02 | -0.47 | -0.49 |       |    |
| GENE964X | 16458_s_at | 16458_s_at | 1     | -1.39 | -0.91 | -0.73 | -1.08 | -1.28 | -1.32 | -     |       |       |    |
| 1.15     | -1.35      | -0.71      | -0.81 | -0.73 | -0.68 | -0.53 | -1.59 | -0.73 | -0.26 | -0.47 | -0.66 | -0.78 | -  |
| 0.64     | -0.59      | -0.68      | -0.51 | -0.41 | -0.28 | -0.02 | -0.05 | -0.26 | -0.39 | -0.18 | -0.2  |       |    |
| GENE3X   | 20383_at   | 20383_at   | 1     | -2.47 | -1.18 | -2    | -2.39 | -2.83 | -2.64 | -     |       |       |    |
| 2.39     | -3.47      | -1         | -1.35 | -0.81 | -1.25 | -1.12 | -2.73 | -1.73 | -0.62 | -0.51 | -1    | -0.97 | -  |
| 0.53     | -1.51      | -2.05      | -1.51 | -1.59 | -1.08 | -0.23 | -0.28 | -0.91 | -0.73 | -0.13 | -0.16 |       |    |
| GENE430X | 15167_s_at | 15167_s_at | 1     | -1.64 | -1.02 | -1.28 | -1.94 | -1.78 | -1.83 | -     |       |       |    |
| 2.47     | -2.64      | -0.88      | -1.08 | -1.18 | -0.68 | -0.88 | -2.18 | -0.78 | -0.43 | -0.91 | -0.94 | -1.25 | -  |
| 1.32     | -0.68      | -0.81      | -1.25 | -1.35 | -0.49 | -0.28 | -0.3  | -0.21 | -0.47 | -0.86 | -0.68 |       |    |
| GENE429X | 15271_at   | 15271_at   | 1     | -2.25 | -1.78 | -2.47 | -2.94 | -2.32 | -2.32 | -     |       |       |    |
| 3.47     | -3.18      | -1.12      | -1.47 | -1.69 | -1.43 | -1.55 | -3.18 | -1.55 | -1.12 | -1.69 | -1.73 | -1.78 | -1 |
| -1       | -1.55      | -1.55      | -1.94 | -1.94 | -0.71 | 0.01  | -0.21 | -0.21 | -0.76 | -0.51 |       |       |    |
| GENE428X | 18533_at   | 18533_at   | 1     | -2.39 | -2.18 | -2.39 | -3.05 | -3.05 | -4.05 | -     |       |       |    |
| 4.32     | -3.32      | -1.69      | -2.47 | -2.25 | -1.39 | -1.08 | -4.05 | -1.73 | -1.32 | -1.55 | -2.25 | -2.47 | -  |
| 1.25     | -1.73      | -2.73      | -2.39 | -1.94 | -1.55 | -0.62 | -0.71 | -0.3  | -0.43 | -0.53 | -0.51 |       |    |
| GENE407X | 19652_at   | 19652_at   | 1     | -3.05 | -1.94 | -2    | -2.83 | -2.73 | -2.73 | -     |       |       |    |
| 2.83     | -2.39      | -0.2       | -0.78 | -0.57 | -1.28 | -1.08 | -2    | -0.45 | -0.57 | -0.34 | -0.57 | -1.51 | -  |
| 1.28     | -1.69      | -1.05      | -0.91 | -0.81 | -0.23 | 0.01  | -0.18 | -0.39 | 0.04  | -0.04 | -0.45 |       |    |
| GENE406X | 16351_at   | 16351_at   | 1     | -3.05 | -2.32 | -2.73 | -3.32 | -3.32 | -2.73 | -     |       |       |    |
| 2.94     | -3.47      | -0.41      | -1.59 | -0.64 | -1.59 | -0.88 | -1.64 | -1.88 | -0.18 | 0.02  | -1.05 | -1.32 | -  |
| 0.68     | -1.43      | -1.55      | -0.66 | -0.94 | -0.28 | 0.44  | -0.39 | -0.45 | -0.34 | 0.02  | -0.04 |       |    |
| GENE324X | 17861_at   | 17861_at   | 1     | -2.64 | -2    | -2.32 | -4.05 | -2.39 | -2.39 | -     |       |       |    |
| 2.64     | -3.05      | -0.91      | -1.32 | -0.83 | -1.28 | -1.21 | -2.39 | -1.64 | -0.81 | -0.55 | -1.43 | -1.78 | -  |
| 0.83     | -1.64      | -1.12      | -1.12 | -0.97 | -0.53 | -0.02 | -0.39 | -0.04 | 0.07  | 0.02  | -0.25 |       |    |
| GENE323X | 13629_s_at | 13629_s_at | 1     | -2.18 | -2.32 | -2.39 | -3.05 | -2.55 | -2.73 | -     |       |       |    |
| 2.25     | -2.18      | -0.73      | -0.94 | -0.83 | -1.18 | -1.08 | -1.83 | -1.51 | -0.37 | -0.35 | -1.12 | -1.28 | -  |
| 0.64     | -0.83      | -0.97      | -0.97 | -0.73 | -0.66 | -0.32 | -0.07 | 0     | 0     | 0.04  | -0.18 |       |    |
| GENE107X | 18984_at   | 18984_at   | 1     | -2    | -1.25 | -2.25 | -2.94 | -1.88 | -1.88 | -     |       |       |    |
| 1.88     | -3.05      | -0.66      | -0.94 | -0.73 | -0.83 | -0.83 | -1.43 | -1.28 | 0.04  | -0.35 | -0.97 | -1.05 | -  |
| 0.71     | -1         | -0.86      | -0.62 | -0.39 | -0.34 | -0.28 | -0.39 | -0.41 | -0.35 | -0.53 | -0.43 |       |    |
| GENE106X | 17387_at   | 17387_at   | 1     | -2.47 | -1.43 | -2.05 | -2.25 | -2    | -2    | -     |       |       |    |
| 1.88     | -2.83      | -0.68      | -0.73 | -0.71 | -0.53 | -0.53 | -2    | -0.68 | -0.49 | -0.39 | -0.68 | -0.88 | -  |
| 0.51     | -0.94      | -0.91      | -0.43 | -0.28 | -0.15 | -0.3  | -0.25 | -0.57 | -0.21 | -0.32 | -0.2  |       |    |
| GENE105X | 15578_s_at | 15578_s_at | 1     | -1.73 | -1.12 | -1.69 | -2.25 | -1.88 | -1.35 | -     |       |       |    |
| 2.39     | -2         | -0.76      | -0.91 | -0.59 | -0.76 | -0.91 | -1.35 | -1.08 | -0.28 | -0.1  | -0.73 | -1.39 | -  |
| 0.83     | -0.34      | -1.05      | -0.53 | -0.53 | -0.47 | -0.3  | -0.05 | 0.23  | 0.23  | -0.34 | -0.39 |       |    |
| GENE104X | 17003_at   | 17003_at   | 1     | -1.83 | -0.94 | -1.21 | -2.47 | -2.12 | -2    | -     |       |       |    |
| 2.12     | -1.88      | -0.81      | -0.3  | -0.62 | -0.66 | -0.86 | -1.78 | -1    | 0.04  | 0.02  | -0.76 | -1.02 | -  |
| 0.26     | -0.55      | -1.28      | -1.08 | -0.49 | -0.76 | -0.43 | -0.1  | -0.05 | 0.07  | -0.25 | -0.1  |       |    |
| GENE6X   | 15627_at   | 15627_at   | 1     | -0.43 | -0.45 | -0.71 | -0.81 | -1.05 | -0.97 | -     |       |       |    |
| 0.47     | -1.15      | -0.2       | -0.15 | -0.05 | -0.35 | -0.28 | -0.97 | -0.47 | -0.05 | -0.12 | -0.37 | -0.23 | -  |
| 0.3      | -0.39      | -0.39      | -0.59 | -0.53 | -0.41 | -0.35 | 0     | -0.15 | -0.07 | -0.26 | -0.2  |       |    |
| GENE5X   | 13598_at   | 13598_at   | 1     | -1.25 | -0.64 | -1.59 | -1.32 | -1.83 | -1.25 | -     |       |       |    |
| 1.55     | -2.73      | -0.43      | -0.3  | -0.21 | -0.97 | -1.39 | -2.25 | -0.68 | 0.04  | -0.3  | -0.28 | -0.41 | -  |
| 0.37     | -0.86      | -1.25      | -1.15 | -0.78 | -0.51 | -0.15 | 0.25  | -0.18 | -0.15 | 0.23  | 0.16  |       |    |
| GENE670X | 15658_at   | 15658_at   | 1     | -0.23 | -0.66 | -1.12 | -1.18 | -0.91 | -0.81 | -     |       |       |    |
| 1.35     | -1.69      | -0.05      | -0.71 | -0.2  | -0.35 | -0.05 | -1.02 | -0.94 | 0.32  | 0.32  | -0.25 | -0.25 | -  |
| 0.02     | -0.34      | -0.07      | 0     | -0.08 | -0.12 | -0.34 | -0.07 | 0.11  | -0.02 | 0.07  | 0.08  |       |    |
| GENE669X | 18581_at   | 18581_at   | 1     | -0.53 | -1.69 | -2.25 | -1.12 | -1.55 | -1.94 | -     |       |       |    |
| 2.83     | -2.83      | -0.2       | -0.91 | 0.34  | -0.45 | 0.02  | -1.59 | -0.71 | 0.12  | 0.23  | 0.18  | -0.3  | -  |
| 0.16     | -0.23      | 0.34       | -0.76 | -1    | -0.41 | -0.05 | -0.12 | 0.12  | 0.31  | -0.3  | -0.59 |       |    |

|           |            |            |       |       |       |       |       |       |       |       |       |       |   |
|-----------|------------|------------|-------|-------|-------|-------|-------|-------|-------|-------|-------|-------|---|
| GENE668X  | 19901_at   | 19901_at   | 1     | -0.55 | -0.68 | -0.94 | -0.55 | -1.12 | -0.81 | -     |       |       |   |
| 1.05      | -1.47      | -0.25      | -0.83 | -0.12 | 0.23  | 0.11  | -0.71 | -0.47 | 0.26  | 0.05  | -0.26 | -0.59 |   |
|           | 0.29       | -0.04      | -0.05 | -0.32 | -0.39 | -0.35 | -0.35 | -0.68 | -0.12 | -0.32 | -0.78 | -0.02 |   |
| GENE667X  | 19889_at   | 19889_at   | 1     | -0.71 | -1.18 | -1.69 | -1.21 | -1.47 | -1.28 | -     |       |       |   |
| 1.73      | -2.25      | -0.55      | -0.3  | -0.08 | 0.28  | 0.11  | -0.88 | -0.37 | -0.04 | -0.01 | -0.18 | -0.57 | - |
| 0.23      | -0.08      | -0.39      | -0.57 | -0.57 | -0.25 | -0.55 | -0.62 | 0     | 0     | -0.81 | -0.26 | -     |   |
| GENE723X  | 14623_g_at | 14623_g_at | 1     | -1.02 | -1.47 | -0.88 | -0.94 | -0.49 | -0.73 | -     |       |       |   |
| 0.91      | -1.51      | 0.18       | -0.25 | -0.01 | -0.34 | -0.3  | -0.86 | -0.49 | 0.28  | 0.15  | -0.18 | -0.39 | - |
| 0.88      | -0.73      | 0.02       | -0.62 | -0.34 | -0.21 | -0.18 | -0.76 | -0.15 | -0.16 | -0.57 | -0.83 | -     |   |
| GENE722X  | 12452_at   | 12452_at   | 1     | -1.32 | -1.28 | -1.21 | -1.78 | -1.08 | -0.76 | -     |       |       |   |
| 1.25      | -1.64      | -0.2       | -0.35 | 0.21  | -0.07 | -0.04 | -0.91 | -0.37 | 0.04  | -0.2  | -0.32 | -0.45 | - |
| 0.62      | -1.05      | -0.49      | -0.51 | -0.43 | 0     | -0.08 | -0.66 | -0.57 | -0.53 | -0.47 | -0.39 | -     |   |
| GENE404X  | 20234_s_at | 20234_s_at | 1     | -0.66 | -0.91 | -0.94 | -1.05 | -0.73 | -1.08 | -     |       |       |   |
| 0.97      | -1.59      | 0.05       | -1.25 | 0.16  | -0.53 | 0     | -0.53 | -1.05 | 0.27  | 0.29  | -0.47 | -0.41 | - |
| 0.97      | -0.59      | -0.28      | -0.55 | -0.37 | -0.07 | 0.2   | -0.83 | 0.08  | -0.41 | -0.39 | -0.02 | -     |   |
| GENE1159X | 15880_at   | 15880_at   | 1     | -2.25 | -2.18 | -3.83 | -2.64 | -2.32 | -2.32 | -     |       |       |   |
| 1.43      | -2.32      | -0.88      | -3.05 | 0.79  | -1.47 | -0.15 | -0.88 | -3.18 | -0.28 | -0.73 | -1.78 | -1.05 | - |
| 1.28      | -1.15      | -2         | -3.32 | -2.25 | -1.51 | -0.28 | -0.76 | -0.37 | 0.85  | 0.58  | 0     | -     |   |
| GENE929X  | 13634_s_at | 13634_s_at | 1     | -2.05 | -1.35 | -3.05 | -1.55 | -0.71 | -0.66 | -     |       |       |   |
| 1.69      | -2.18      | 0.08       | -1.05 | -0.32 | -0.64 | -0.35 | -0.71 | -1.55 | -0.25 | -0.02 | -0.37 | -1.32 | - |
| 0.3       | -0.88      | -0.34      | -1.12 | -1.05 | -0.71 | -0.04 | 0.11  | 0.11  | -0.15 | -0.1  | 0     | -     |   |
| GENE344X  | 12184_at   | 12184_at   | 1     | -2.18 | -1.02 | -3.47 | -1.94 | -1.21 | -0.83 | -     |       |       |   |
| 2.39      | -2.25      | -0.66      | -2    | -0.91 | -1.02 | -1    | -1.64 | -1.55 | -0.76 | -0.23 | -1    | -1.18 | - |
| 0.15      | -0.88      | -0.25      | -1.05 | -0.73 | -0.64 | -1.15 | -0.43 | -0.15 | 0.12  | -0.15 | -0.26 | -     |   |
| GENE463X  | 20547_at   | 20547_at   | 1     | -2.32 | -0.97 | -1.83 | -1.08 | -1.21 | -0.68 | -     |       |       |   |
| 1.15      | -1.78      | 0          | -1.25 | -0.26 | -0.86 | -0.51 | -1.05 | -1.83 | -0.73 | -0.73 | -0.94 | -0.64 | - |
| 0.43      | -0.43      | 0.32       | -1.51 | -0.97 | -0.43 | -0.18 | 0.59  | -0.07 | -0.07 | -0.59 | 0.37  | -     |   |
| GENE379X  | 12526_at   | 12526_at   | 1     | -2.25 | -2.55 | -1.94 | -2.47 | -1    | -1.21 | -     |       |       |   |
| 1.39      | -2.25      | 0.2        | -1.94 | -0.23 | -1.51 | -0.91 | -0.64 | -1.94 | -0.2  | -0.76 | -0.68 | -0.51 | - |
| 1.18      | -1.15      | 0.23       | -1.28 | -0.94 | -0.26 | -0.66 | -0.97 | 0.21  | 0.12  | -0.45 | -0.41 | -     |   |
| GENE378X  | 19663_at   | 19663_at   | 1     | -1.32 | -1.69 | -2.47 | -2.32 | -0.78 | -0.73 | -     |       |       |   |
| 1.39      | -1.51      | 0.27       | -1.18 | -0.76 | -1.02 | -0.55 | -0.76 | -1.25 | -0.15 | 0.01  | -0.91 | -1.39 | - |
| 0.73      | -1.39      | -0.13      | -1.05 | -0.83 | -0.23 | -0.68 | -1.39 | -0.35 | -0.71 | -0.21 | -0.1  | -     |   |
| GENE377X  | 15490_at   | 15490_at   | 1     | -1.47 | -2    | -2.83 | -2.83 | -1.32 | -0.68 | -     |       |       |   |
| 2.18      | -2.18      | 0.17       | -1.28 | -0.15 | -1.18 | -0.78 | -1.21 | -1.35 | 0.31  | 0.13  | -0.68 | -1.12 | - |
| 0.59      | -0.76      | -0.25      | -1.28 | -1.35 | -0.78 | -0.86 | -1.83 | -0.2  | -0.35 | -0.35 | -0.35 | -     |   |
| GENE345X  | 20298_at   | 20298_at   | 1     | -1.25 | -1.12 | -2    | -2    | -0.55 | -0.86 | -     |       |       |   |
| 1.05      | -2.32      | -0.32      | -1.69 | -0.86 | -0.83 | -0.78 | -1.47 | -1.51 | -0.37 | -0.35 | -0.71 | -0.3  | - |
|           | 0.08       | -0.41      | -0.04 | -0.71 | -0.83 | -0.3  | -0.3  | -0.83 | -0.05 | -0.59 | 0.02  | 0.02  | - |
| GENE370X  | 18004_at   | 18004_at   | 1     | -2.18 | -1.47 | -2.12 | -2.32 | -1.15 | -0.94 | -     |       |       |   |
| 1.08      | -1.69      | 0.29       | -1.15 | -0.43 | -0.53 | -0.3  | -0.55 | -1.39 | -0.55 | -0.53 | -0.97 | -0.83 | - |
| 0.51      | -1         | -0.04      | -1.25 | -1    | -0.78 | -1.21 | -0.47 | -0.64 | -0.16 | -0.18 | -0.26 | -     |   |
| GENE369X  | 15661_s_at | 15661_s_at | 1     | -1.39 | -1.47 | -2.94 | -3.05 | -1.83 | -1.18 | -     |       |       |   |
| 1.51      | -1.94      | 0.69       | -1.02 | -1.02 | -0.55 | -0.34 | -0.41 | -1.55 | 0.15  | -0.04 | -1.02 | -1.35 | - |
| 0.15      | -1         | 0.33       | -1.28 | -1    | -0.83 | -1.35 | -1.08 | -0.71 | -0.35 | -0.57 | 0.12  | -     |   |
| GENE368X  | 15566_at   | 15566_at   | 1     | -2.73 | -1.18 | -3.32 | -3.05 | -2    | -2.47 | -     |       |       |   |
| 2.18      | -2.94      | 1.26       | -1.94 | -0.62 | -0.76 | -1.18 | -1.73 | -2.05 | -0.1  | -0.35 | -0.51 | -1.94 | - |
| 0.59      | -2.47      | -0.97      | -1.55 | -1.32 | -0.97 | -1.08 | -0.83 | -0.1  | 0     | -0.51 | -0.12 | -     |   |
| GENE990X  | 17468_at   | 17468_at   | 1     | -0.71 | -0.35 | -0.37 | -0.51 | -0.68 | -1.02 | -     |       |       |   |
| 0.97      | -1.32      | -0.26      | 0.12  | -0.01 | 0.16  | 0.07  | -0.73 | -0.08 | 0.15  | 0.08  | -0.15 | -0.51 | - |
| 0.13      | -0.21      | -0.66      | -0.2  | -0.25 | -0.12 | 0.28  | 0.27  | -0.1  | -0.07 | -0.12 | -0.21 | -     |   |
| GENE989X  | 15601_s_at | 15601_s_at | 1     | -0.43 | -0.68 | -0.66 | -0.34 | -0.83 | -1.39 | -2    |       |       |   |
|           | -2.55      | -0.55      | -0.18 | -0.25 | 0.18  | -0.05 | -1.73 | -0.13 | 0.27  | 0.09  | -0.41 | -0.97 | - |
| 0.88      | -0.32      | -1         | -0.08 | -0.1  | -0.1  | -0.21 | -0.35 | -0.13 | -0.01 | -0.43 | -0.23 | -     |   |
| GENE724X  | 13293_s_at | 13293_s_at | 1     | -1.32 | -1.39 | -1.21 | -1.25 | -0.76 | -1    | -     |       |       |   |
| 2.55      | -1.83      | -0.04      | 0.51  | 0.13  | -0.26 | -0.32 | -1.35 | 0.16  | 0.11  | 0.17  | -0.08 | -1.02 | - |
| 0.81      | -0.64      | -0.39      | -0.45 | -0.23 | -0.08 | 0.44  | -0.91 | -0.07 | -0.18 | 0.01  | -0.39 | -     |   |



|           |            |            |       |       |       |       |       |       |       |       |       |       |    |
|-----------|------------|------------|-------|-------|-------|-------|-------|-------|-------|-------|-------|-------|----|
| GENE690X  | 16751_at   | 16751_at   | 1     | -2.32 | -1.25 | -2.55 | -2.94 | -1.21 | -1.43 | -     |       |       |    |
| 3.83      | -2.47      | -0.41      | -0.55 | -0.13 | -1.55 | -0.68 | -2    | -1.69 | 0.45  | 0.36  | -0.66 | -1.47 | -2 |
|           | -2.25      | -0.88      | -0.86 | -0.86 | 0.11  | 0.16  | -1    | 0.88  | -0.12 | -0.15 | 0.04  |       |    |
| GENE462X  | 14008_at   | 14008_at   | 1     | -1.39 | -0.57 | -0.83 | -1.15 | -0.81 | -0.66 | -     |       |       |    |
| 1.35      | -1.35      | -0.18      | -0.55 | -0.35 | -0.68 | -0.45 | -0.78 | -0.41 | -0.3  | 0.02  | -0.57 | 0     | -  |
| 1.05      | -0.71      | -0.35      | -0.47 | -0.3  | 0.13  | -0.18 | -0.13 | -0.13 | 0     | -0.04 | 0.02  |       |    |
| GENE405X  | 13551_at   | 13551_at   | 1     | -0.83 | -0.21 | -1.15 | -0.35 | -0.59 | -1.12 | -     |       |       |    |
| 1.43      | -1.51      | -0.34      | -1.25 | -0.35 | -0.71 | -0.64 | -1.08 | -0.83 | 0.11  | -0.2  | -0.3  | -0.78 | -  |
| 1.18      | -0.68      | -0.62      | -0.45 | -0.32 | -0.16 | -0.16 | -0.12 | -0.05 | -0.05 | -0.26 | -0.16 |       |    |
| GENE427X  | 14951_at   | 14951_at   | 1     | -1.28 | -0.12 | -1.18 | -0.83 | -0.18 | -1.32 | -     |       |       |    |
| 1.28      | -1.05      | -0.47      | 0.17  | -0.26 | -0.81 | -0.78 | -1.55 | -0.16 | -0.43 | -0.43 | -0.91 | -1.21 | -  |
| 0.51      | -1         | -0.94      | -0.47 | -0.55 | 0.23  | 0.07  | -0.35 | -0.25 | 0.09  | 0.11  | 0     |       |    |
| GENE987X  | 17863_at   | 17863_at   | 1     | -0.71 | 0.16  | -0.08 | -0.62 | -1    | -1.18 | -     |       |       |    |
| 0.83      | -1.43      | -0.39      | -0.13 | -0.15 | 0.02  | 0.02  | -1.02 | 0.02  | 0.33  | 0.26  | -0.37 | -0.47 |    |
|           | 0.02       | -0.47      | -0.57 | -0.12 | -1.21 | -0.15 | -0.12 | -0.35 | 0.08  | -0.23 | -0.21 | -0.18 |    |
| GENE8X    | 17865_at   | 17865_at   | 1     | -0.94 | -0.64 | -0.18 | -0.91 | -2.18 | -2.18 | -     |       |       |    |
| 2.25      | -1.83      | -1.08      | -0.2  | -0.32 | -0.37 | -0.64 | -1.64 | -0.59 | 0.49  | -0.07 | -0.45 | -0.68 | -  |
| 0.35      | -1.08      | -1.55      | -0.83 | -1.02 | -0.26 | -0.71 | -0.21 | -0.66 | -0.51 | 0.02  | 0.21  |       |    |
| GENE7X    | 13052_s_at | 13052_s_at | 1     | -1.28 | -0.53 | -0.97 | -1.32 | -2.32 | -1.59 | -     |       |       |    |
| 1.94      | -1.69      | -0.64      | -0.16 | -0.39 | -0.1  | -0.3  | -1.59 | 0.04  | 0.34  | 0.56  | -0.83 | -0.55 | -  |
| 0.23      | -0.76      | -0.91      | -0.68 | -0.86 | -0.57 | -0.64 | -0.07 | -0.16 | 0.16  | 0.73  | -0.23 |       |    |
| GENE1170X | 13250_s_at | 13250_s_at | 1     | -0.88 | -0.08 | -2.47 | -1.51 | -0.55 | -0.55 | -     |       |       |    |
| 1.35      | -1.43      | -0.05      | -1.21 | -0.49 | -0.49 | -0.49 | -0.78 | -0.78 | 0.28  | -0.2  | -0.49 | -2.18 | -  |
| 0.45      | -0.66      | -0.1       | -0.83 | -1.43 | -0.41 | -1.08 | -0.35 | -0.23 | -0.28 | -0.35 | -0.39 |       |    |
| GENE1169X | 13644_at   | 13644_at   | 1     | -0.81 | -0.18 | -1.18 | -1.51 | -0.97 | -1.28 | -     |       |       |    |
| 1.35      | -1.69      | -0.45      | -1.21 | -0.66 | -0.28 | -0.18 | -0.51 | -1.02 | 0.26  | 0.42  | -0.59 | -1.08 | -1 |
|           | -0.43      | -0.68      | -0.86 | -1.05 | -0.49 | -0.83 | -0.23 | 0.35  | -0.16 | -1.15 | -0.71 |       |    |
| GENE1168X | 14301_at   | 14301_at   | 1     | -1.35 | -0.41 | -1.21 | -1.25 | -0.86 | -0.59 | -1    |       |       |    |
|           | -1.21      | -0.32      | -0.41 | -0.3  | 0.09  | -0.35 | -0.94 | -0.45 | 0.13  | -0.3  | -0.83 | -0.94 | -  |
| 0.43      | -0.55      | -0.37      | -0.78 | -0.81 | -0.66 | -0.1  | -0.3  | -0.25 | 0.01  | -0.51 | -0.01 |       |    |
| GENE1167X | 16986_at   | 16986_at   | 1     | -1.59 | -1.02 | -1.51 | -2    | -0.94 | -1.69 | -     |       |       |    |
| 1.73      | -1.21      | -0.64      | -1.32 | -0.51 | -0.39 | -0.32 | -1.15 | -0.94 | -0.13 | -0.55 | -0.76 | -1.51 | -  |
| 1.15      | -0.88      | -0.76      | -1.73 | -1.64 | -1.55 | -0.71 | -0.35 | 0.27  | 0.27  | -0.88 | -0.83 |       |    |
| GENE1166X | 17257_s_at | 17257_s_at | 1     | -1.94 | -0.78 | -1.83 | -3.47 | -1.25 | -0.73 | -     |       |       |    |
| 2.12      | -1.94      | -0.49      | -1.64 | -1.05 | 0     | -0.78 | -1.47 | -1.18 | 0     | 0.15  | -0.86 | -1.51 | -  |
| 1.15      | -2.64      | -0.23      | -1.83 | -2.12 | -0.91 | -1.02 | -0.1  | 0.16  | -0.2  | -0.25 | -0.12 |       |    |
| GENE661X  | 12170_at   | 12170_at   | 1     | -0.91 | -0.35 | -1.88 | -1.69 | -1.12 | -0.83 | -     |       |       |    |
| 1.59      | -1.25      | -0.3       | -0.66 | -0.55 | -0.28 | -0.53 | -1.05 | -0.49 | -0.53 | 0.09  | -0.91 | -0.45 | -  |
| 0.66      | -0.35      | -0.51      | -0.78 | -0.73 | -0.15 | -0.59 | -0.02 | 0.11  | 0.25  | -0.21 | 0.01  |       |    |
| GENE660X  | 13253_f_at | 13253_f_at | 1     | -0.73 | -0.55 | -2.47 | -1.47 | -1.32 | -0.73 | -     |       |       |    |
| 1.32      | -1.25      | -0.59      | -0.83 | -0.49 | -0.21 | -0.57 | -0.91 | -0.91 | -0.1  | -0.37 | -0.66 | -0.62 | -  |
| 0.34      | -0.59      | -1.43      | -0.91 | -0.28 | -0.1  | -0.66 | -0.13 | -0.41 | -0.21 | -0.43 | -0.49 |       |    |
| GENE659X  | 19381_at   | 19381_at   | 1     | -1.28 | -1    | -3.18 | -1.94 | -1.88 | -2.55 | -     |       |       |    |
| 2.05      | -1.51      | -1.02      | -1.05 | -0.47 | -0.15 | -0.32 | -2.05 | -1.05 | -0.53 | -0.39 | -0.73 | -1.32 | -  |
| 0.59      | -1.25      | -1.51      | -1.35 | -0.86 | -0.73 | -0.57 | -0.45 | -0.18 | -0.12 | -0.47 | 0.08  |       |    |
| GENE663X  | 12693_at   | 12693_at   | 1     | -0.73 | -0.68 | -2.05 | -1.28 | -1    | -1.28 | -     |       |       |    |
| 1.47      | -1.94      | -0.34      | -1.69 | -0.28 | -0.49 | -0.45 | -1.32 | -1.32 | 0.09  | -0.16 | -0.94 | -0.62 | -  |
| 0.41      | -0.59      | -0.3       | -1.05 | -0.83 | -0.59 | -0.94 | -0.91 | -0.32 | -0.1  | -0.26 | 0.11  |       |    |
| GENE662X  | 12120_at   | 12120_at   | 1     | -0.66 | -0.3  | -1.47 | -1.28 | -1.15 | -0.83 | -     |       |       |    |
| 1.51      | -1.69      | -0.47      | -0.78 | -0.35 | -0.3  | -0.37 | -1.12 | -0.73 | 0.07  | 0.07  | -0.94 | -0.83 | -  |
| 0.23      | -0.73      | -0.41      | -1.05 | -0.86 | -0.45 | -1.02 | -0.28 | -0.13 | 0.02  | 0.32  | 0.11  |       |    |
| GENE658X  | 13905_at   | 13905_at   | 1     | -0.97 | -0.68 | -2.32 | -2.12 | -1.43 | -1.69 | -     |       |       |    |
| 1.15      | -1.83      | -0.47      | -1.02 | -0.78 | -0.23 | -0.16 | -0.83 | -0.88 | 0.52  | 0.36  | -0.86 | -1.35 | -  |
| 0.88      | -1.28      | -0.68      | -1.55 | -1.18 | -0.62 | -0.88 | -1.15 | -0.66 | -0.59 | -0.43 | -0.37 |       |    |
| GENE657X  | 20198_at   | 20198_at   | 1     | -0.66 | -0.41 | -1.55 | -1    | -1.05 | -1.25 | -     |       |       |    |
| 1.12      | -1.25      | -0.66      | -0.66 | -0.59 | 0.07  | -0.15 | -0.55 | -0.47 | -0.21 | 0.2   | -0.51 | -0.64 | 0  |
|           | -0.49      | -0.78      | -0.86 | -0.97 | -0.47 | -0.78 | -1    | -0.34 | -0.32 | -0.1  | -0.05 |       |    |

|          |            |            |       |       |       |       |       |       |       |       |       |       |   |
|----------|------------|------------|-------|-------|-------|-------|-------|-------|-------|-------|-------|-------|---|
| GENE656X | 12810_at   | 12810_at   | 1     | -1.35 | -1.02 | -2.32 | -1.51 | -2.18 | -1.69 | -     |       |       |   |
| 1.78     | -1.35      | -0.91      | -0.88 | -0.41 | -0.02 | -0.05 | -0.66 | -0.91 | 0.21  | -0.08 | -0.41 | -0.97 | - |
| 0.28     | -0.76      | -1.28      | -1.55 | -1.55 | -0.81 | -1.64 | -0.62 | -0.28 | -0.26 | -0.53 | -0.21 |       |   |
| GENE401X | 12100_at   | 12100_at   | 1     | -0.78 | 0     | -1.78 | -1.28 | -1.32 | -2    | -     |       |       |   |
| 2.12     | -1.08      | 0.43       | -0.64 | -0.71 | 0     | -0.15 | -2.12 | -1.28 | -0.41 | 0     | -0.94 | -0.71 | - |
| 2.12     | -1.64      | 0.32       | -0.83 | -1.28 | -0.13 | -1.32 | -1.88 | -1.47 | -0.53 | 0.05  | -0.59 |       |   |
| GENE392X | 12405_at   | 12405_at   | 1     | -1.35 | -0.64 | -1.83 | -1.88 | -1.35 | -1.39 | -     |       |       |   |
| 1.51     | -1.78      | -0.07      | -1.51 | -0.45 | -0.73 | -0.13 | -1.94 | -0.94 | -0.35 | 0.34  | -0.64 | -0.73 | - |
| 1.21     | -0.66      | -0.32      | -0.88 | -0.51 | -0.05 | -0.66 | -0.86 | -0.49 | -0.68 | -0.35 | -0.66 |       |   |
| GENE391X | 16518_at   | 16518_at   | 1     | -1    | -0.39 | -1.21 | -1.43 | -1.47 | -0.49 | -     |       |       |   |
| 0.88     | -1.28      | 0.32       | -0.73 | -0.16 | -0.15 | -0.32 | -1.08 | -0.78 | 0.09  | -0.21 | -0.37 | -0.66 | - |
| 0.55     | -1.02      | 0.33       | -0.26 | -0.26 | 0.07  | 0.04  | -0.43 | -0.2  | -0.35 | -0.41 | -0.07 |       |   |
| GENE390X | 14047_g_at | 14047_g_at | 1     | -1.32 | -0.07 | -2.64 | -2.83 | -1.59 | -0.68 | -     |       |       |   |
| 1.64     | -1.69      | 0.04       | -1.73 | -1.39 | -0.13 | -0.21 | -1.35 | -1.88 | -0.32 | -0.25 | -1.43 | -1.39 | - |
| 0.64     | -1.25      | -0.37      | -0.68 | -0.59 | -0.18 | -1.39 | -1.47 | -0.73 | -0.66 | -2.18 | -0.37 |       |   |
| GENE674X | 19012_at   | 19012_at   | 1     | -0.73 | -0.34 | -0.91 | -0.83 | -0.41 | -0.68 | -     |       |       |   |
| 1.51     | -1.25      | 0.48       | -0.28 | 0.28  | 0.16  | 0.26  | -0.39 | -0.04 | 0.34  | 0.12  | -0.35 | -0.76 | - |
| 1.08     | -0.71      | 0.23       | -0.62 | -0.53 | -0.21 | -0.51 | -0.35 | 0.11  | -0.16 | -0.21 | 0.02  |       |   |
| GENE673X | 19981_at   | 19981_at   | 1     | -0.49 | -0.21 | -0.66 | -1.12 | -0.55 | -0.55 | -     |       |       |   |
| 1.05     | -0.86      | 0.18       | -0.1  | -0.07 | -0.18 | 0     | -0.39 | -0.25 | 0.13  | -0.1  | -0.25 | -0.88 | - |
| 0.49     | -0.59      | -0.23      | -0.34 | -0.08 | 0.07  | -0.73 | -0.32 | 0.21  | 0.02  | -0.3  | -0.1  |       |   |
| GENE672X | 14746_at   | 14746_at   | 1     | -0.47 | 0.21  | -1.25 | -1.35 | -0.37 | -0.07 | -     |       |       |   |
| 1.12     | -0.91      | 0.34       | -0.57 | -0.05 | 0.11  | 0.23  | -0.64 | -0.41 | 0.34  | 0.58  | -0.25 | -0.83 | - |
| 0.13     | -0.49      | 0.22       | -0.86 | -0.86 | -0.15 | -0.51 | -0.2  | 0.04  | 0.27  | -0.47 | -0.04 |       |   |
| GENE671X | 14956_at   | 14956_at   | 1     | -0.43 | -0.07 | -1.69 | -1.64 | -0.66 | -0.05 | -     |       |       |   |
| 1.83     | -1.35      | 0.22       | -0.07 | 0.11  | 0.54  | 0.43  | -0.51 | -0.1  | 0.8   | 1.15  | -0.26 | -1.55 | - |
| 0.15     | -0.71      | -0.39      | -1.02 | -1    | -0.41 | -0.66 | -1    | -0.16 | 0.01  | -0.53 | 0     |       |   |
| GENE676X | 18436_at   | 18436_at   | 1     | -0.68 | -0.66 | -1.64 | -1.64 | -0.04 | -0.08 | -     |       |       |   |
| 1.28     | -1.18      | 0.72       | -0.73 | -0.32 | -0.28 | -0.15 | -0.57 | -0.76 | 0.52  | 0.67  | -0.64 | -0.76 | - |
| 0.41     | -0.47      | 0.7        | -1.12 | -0.81 | -0.88 | -0.97 | -0.37 | 0.01  | 0.07  | -0.37 | -0.15 |       |   |
| GENE675X | 20490_at   | 20490_at   | 1     | -0.16 | -0.76 | -1.43 | -0.66 | -0.66 | -0.59 | -     |       |       |   |
| 1.51     | -1.05      | 0.01       | -0.64 | -0.04 | -0.15 | -0.18 | -0.43 | -0.39 | 0.63  | -0.07 | -0.23 | -0.45 | - |
| 0.3      | -0.53      | -0.1       | -1.25 | -0.68 | -0.88 | -1    | -0.59 | -0.18 | -0.02 | -0.41 | 0.15  |       |   |
| GENE666X | 17169_at   | 17169_at   | 1     | -0.25 | -0.78 | -1.55 | -1.32 | -1.02 | -0.49 | -     |       |       |   |
| 1.05     | -0.64      | -0.13      | -0.62 | -0.28 | 0     | 0.11  | -0.05 | -0.73 | 0.38  | 0.35  | -0.34 | -0.76 | - |
| 0.23     | -0.28      | -0.25      | -1.08 | -0.73 | -0.64 | -0.47 | -0.66 | 0.05  | 0.02  | -0.07 | -0.08 |       |   |
| GENE644X | 16066_at   | 16066_at   | 1     | -1.15 | -2.39 | -3.64 | -4.05 | -1    | -1    | -     |       |       |   |
| 2.83     | -2         | 0.71       | -0.73 | -0.35 | -0.64 | 0.18  | -0.53 | -1.64 | 1     | 0.72  | -0.2  | -1.08 | - |
| 0.41     | -0.37      | 0.27       | -1.43 | -1.32 | -1.35 | -1.35 | -1.43 | 0.16  | -0.26 | -0.59 | -1    |       |   |
| GENE639X | 20195_at   | 20195_at   | 1     | -0.68 | -0.59 | -1.12 | -1.25 | -0.91 | -0.08 | -     |       |       |   |
| 1.05     | -0.62      | 0.25       | 0.26  | -0.49 | 0.04  | -0.1  | -0.21 | -0.1  | 0.45  | -0.23 | -0.71 | -0.71 | - |
| 1.25     | -0.34      | -0.64      | -1.18 | -0.45 | -0.21 | -0.66 | -0.78 | 0.38  | 0.49  | -0.05 | 0.04  |       |   |
| GENE721X | 13233_at   | 13233_at   | 1     | -0.91 | -0.94 | -1.25 | -1.35 | -0.73 | -0.34 | -     |       |       |   |
| 1.35     | -1.28      | -0.32      | -0.35 | -0.3  | 0.13  | 0.15  | -0.64 | -0.47 | 0.16  | -0.01 | -0.1  | -0.62 | - |
| 0.83     | -0.32      | -0.28      | -0.39 | -0.86 | -0.28 | -0.1  | -0.08 | 0.05  | -0.2  | -0.3  | -0.12 |       |   |
| GENE720X | 16696_at   | 16696_at   | 1     | -1.25 | -2.39 | -2.32 | -4.05 | -1.64 | -1.25 | -     |       |       |   |
| 2.64     | -3.47      | -0.16      | -1.15 | -0.32 | -0.15 | 0     | -1.15 | -1.25 | 0.65  | 0.54  | -0.47 | -1.02 | - |
| 1.15     | -0.81      | -0.91      | -1.47 | -1.73 | -1.12 | -0.78 | -1.25 | -0.05 | 0.07  | -0.23 | -0.23 |       |   |
| GENE645X | 19219_at   | 19219_at   | 1     | -0.91 | -3.18 | -3.83 | -3.18 | -1.47 | -1    | -     |       |       |   |
| 2.73     | -4.64      | 0.2        | -0.68 | -0.53 | -0.57 | -0.53 | -1.02 | -0.91 | 0     | -0.16 | -0.86 | -1.39 | - |
| 0.64     | -0.78      | -0.45      | -0.86 | -0.76 | 0.02  | -1.18 | -1.51 | -0.35 | -0.55 | 0.07  | -0.05 |       |   |
| GENE643X | 16607_s_at | 16607_s_at | 1     | -0.28 | -1.83 | -2.64 | -2.05 | -1.28 | -0.53 | -2    |       |       |   |
| -1.55    | 0.02       | -0.78      | -0.39 | -0.2  | -0.45 | -0.97 | -0.97 | 0.27  | -0.05 | -0.53 | -0.15 | -     |   |
| 0.43     | -0.47      | -0.05      | -1.15 | -1.02 | -0.66 | -0.26 | -0.49 | -0.34 | -0.32 | -0.15 | -0.01 |       |   |
| GENE647X | 12559_at   | 12559_at   | 1     | -0.53 | -0.76 | -1.59 | -1.47 | -0.81 | -0.86 | -     |       |       |   |
| 1.64     | -1.73      | 0.18       | -0.66 | -0.18 | -0.05 | 0.12  | -0.81 | -0.47 | 0.47  | -0.15 | -0.57 | -0.73 | - |
| 0.71     | -1.18      | -0.1       | -1.25 | -0.88 | -0.3  | -0.25 | -1.21 | -0.18 | -0.08 | -0.3  | 0.09  |       |   |

|          |            |            |       |       |       |       |       |       |       |       |       |       |   |
|----------|------------|------------|-------|-------|-------|-------|-------|-------|-------|-------|-------|-------|---|
| GENE646X | 16316_at   | 16316_at   | 1     | -0.62 | -1.05 | -1.43 | -1.51 | -0.91 | -0.37 | -     |       |       |   |
| 1.12     | -1.32      | 0.42       | 0.09  | 0.15  | -0.34 | 0.01  | -0.64 | -0.18 | 0     | -0.45 | -0.49 | -0.86 | - |
| 0.62     | -0.86      | 0          | -0.68 | -1.02 | -0.62 | -0.73 | -0.78 | -0.07 | 0.11  | -0.15 | -0.39 |       |   |
| GENE649X | 14384_at   | 14384_at   | 1     | -1.55 | -2.32 | -2    | -2.73 | -0.41 | -0.86 | -     |       |       |   |
| 0.73     | -2.47      | 0.4        | 0.02  | -0.49 | 0.53  | 0.08  | -0.76 | -0.16 | -0.02 | 0.36  | -0.43 | -0.97 | - |
| 0.51     | -0.83      | 0.11       | -1.35 | -1.02 | -0.88 | -0.41 | -0.47 | -0.05 | -0.26 | -0.26 | -0.04 |       |   |
| GENE648X | 14436_at   | 14436_at   | 1     | -0.88 | -3.47 | -4.05 | -3.64 | -1.18 | -1.12 | -     |       |       |   |
| 1.73     | -1.78      | 0.52       | 0.53  | 0.38  | 0.17  | 0.23  | 0.01  | 0.21  | 0.15  | 0.11  | -0.41 | -1.21 | - |
| 1.02     | -1.88      | -0.91      | -2.94 | -1.05 | -0.68 | 0.01  | -1.55 | -0.02 | 0.01  | -0.23 | -0.34 |       |   |
| GENE992X | 15602_f_at | 15602_f_at | 1     | -1.35 | -1.51 | -1.12 | -1.12 | -1.18 | -1.18 | -1.28 | -     |       |   |
| 2.55     | -2.25      | 0.42       | 0.48  | 0.27  | -0.1  | -0.32 | -0.64 | -0.12 | 0.35  | 0.27  | 0.09  | -0.2  | - |
| 0.59     | -0.15      | -0.49      | -0.76 | -0.55 | -0.71 | -0.05 | -0.13 | -0.07 | -0.07 | -0.16 | -0.26 |       |   |
| GENE991X | 17923_s_at | 17923_s_at | 1     | -2.64 | -1.02 | -2.55 | -1.69 | -2    | -1.73 | -     |       |       |   |
| 3.47     | -3.47      | 0.91       | 0.53  | 0.74  | 0.2   | 0.02  | 0.22  | 0.05  | 0.58  | 0.32  | 0.01  | -0.81 | - |
| 0.55     | -0.97      | -1.25      | -1.21 | -1.15 | -0.71 | -0.13 | -0.02 | -0.41 | -0.12 | 0.28  | 0.25  |       |   |
| GENE619X | 15465_at   | 15465_at   | 1     | -1.12 | -0.43 | -1.83 | -1.12 | -0.73 | -0.73 | -     |       |       |   |
| 1.55     | -0.78      | 0.15       | 0.23  | 0.11  | 0.2   | 0.04  | -0.51 | -0.53 | 0.2   | 0.17  | -0.18 | -0.76 | - |
| 0.39     | -0.53      | -0.45      | -0.39 | -0.43 | -0.26 | -0.34 | -0.15 | 0     | 0.13  | -0.23 | 0.01  |       |   |
| GENE618X | 15781_at   | 15781_at   | 1     | -1.47 | -0.81 | -2.64 | -2.25 | -1.64 | -1.94 | -     |       |       |   |
| 2.94     | -2.47      | -0.21      | -0.34 | -0.12 | 0.08  | 0.09  | -1.12 | -0.32 | 0.61  | -0.16 | -0.35 | -1.28 | - |
| 0.62     | -0.66      | -0.94      | -0.66 | -0.91 | -0.45 | -0.73 | -0.21 | -0.18 | 0.41  | -0.55 | -0.21 |       |   |
| GENE617X | 17032_s_at | 17032_s_at | 1     | -1.35 | -1.28 | -2.64 | -2.12 | -1.83 | -1.78 | -     |       |       |   |
| 2.32     | -2.39      | 0.28       | 0.26  | 0.21  | 0.31  | 0.23  | -0.2  | -0.26 | 0.44  | 0.15  | -0.15 | -1.28 | - |
| 1.12     | -1.28      | -0.73      | -0.62 | -0.68 | -0.13 | -0.49 | -0.59 | -0.07 | -0.16 | -0.41 | -0.2  |       |   |
| GENE616X | 16468_at   | 16468_at   | 1     | -1.73 | -1.18 | -2.32 | -2.47 | -1.94 | -2.73 | -     |       |       |   |
| 3.47     | -2.94      | -0.1       | 0.21  | 0.51  | -0.13 | -0.05 | -1.47 | -0.28 | 0.16  | 0.35  | -0.49 | -1.55 | - |
| 1.25     | -1.21      | -1.28      | -1.21 | -0.81 | -0.41 | 0.05  | -0.41 | 0.38  | 0.21  | -0.18 | -0.13 |       |   |
| GENE615X | 14029_at   | 14029_at   | 1     | -3.32 | -3.18 | -3.32 | -3.64 | -2.64 | -3.05 | -     |       |       |   |
| 4.05     | -3.32      | -0.04      | -0.15 | 0.34  | -0.25 | -0.18 | -1.47 | -0.62 | 0.6   | 0.37  | 0.11  | -1.69 | - |
| 0.81     | -1.18      | -2         | -1.43 | -0.68 | -0.41 | -0.05 | 0     | 0.29  | 0.4   | -0.35 | -0.04 |       |   |
| GENE287X | 14664_i_at | 14664_i_at | 1     | -1.69 | -1.64 | -2.18 | -2.18 | -1.59 | -1.05 | -     |       |       |   |
| 2.83     | -1.15      | 0.08       | -0.07 | 0.11  | -0.18 | -0.64 | -0.41 | -0.41 | 0.61  | 0.18  | -0.21 | -0.3  | - |
| 1.05     | -0.83      | -0.71      | -0.71 | -0.78 | -0.37 | -0.43 | -0.49 | -0.04 | 0.01  | -0.2  | -0.37 |       |   |
| GENE286X | 14665_r_at | 14665_r_at | 1     | -1.32 | -1.73 | -1.64 | -2.25 | -2.18 | -1.32 | -     |       |       |   |
| 2.64     | -1.21      | -0.04      | -0.05 | -0.23 | -0.23 | -0.3  | -0.51 | -0.76 | 0.36  | 0.08  | -0.45 | -0.62 | - |
| 1.08     | -1.05      | -0.59      | -0.83 | -0.88 | -0.45 | -0.34 | -0.68 | -0.04 | -0.34 | -0.13 | -0.2  |       |   |
| GENE285X | 14730_s_at | 14730_s_at | 1     | -0.88 | -1.28 | -1.05 | -1.05 | -0.91 | -0.71 | -     |       |       |   |
| 1.15     | -1         | -0.08      | -0.07 | -0.12 | -0.28 | -0.32 | -0.37 | -0.37 | 0     | 0.21  | -0.13 | -0.28 | - |
| 0.41     | -0.45      | -0.3       | -0.32 | -0.25 | -0.25 | -0.18 | -0.07 | -0.13 | -0.05 | -0.01 | -0.04 |       |   |
| GENE284X | 14666_s_at | 14666_s_at | 1     | -1.55 | -1.73 | -1.55 | -1.73 | -2.18 | -1.43 | -     |       |       |   |
| 2.25     | -2.18      | -0.15      | -0.07 | -0.23 | -0.05 | -0.18 | -0.88 | -0.76 | 0.31  | 0.11  | -0.53 | -0.71 | - |
| 0.64     | -0.81      | -0.43      | -1.02 | -0.81 | -0.55 | -0.57 | -0.45 | -0.12 | 0     | -0.12 | 0     |       |   |
| GENE283X | 13546_at   | 13546_at   | 1     | -3.18 | -2.83 | -3.64 | -3.18 | -4.32 | -2.94 | -     |       |       |   |
| 4.05     | -2.94      | 0.34       | -0.68 | -0.3  | -0.08 | -0.02 | -1.12 | -0.94 | 0.02  | 0.21  | -0.71 | -0.59 | - |
| 1.28     | -1         | -0.68      | -0.86 | -0.81 | -0.83 | 0.26  | -0.05 | 0.18  | -0.3  | -0.12 | -0.45 |       |   |
| GENE907X | 14335_at   | 14335_at   | 1     | -1.32 | -0.59 | -1.59 | -2.32 | -1.18 | -0.43 | -     |       |       |   |
| 3.18     | -1.32      | -0.05      | 0.11  | 0     | -0.49 | -0.32 | -0.64 | -0.51 | 0.08  | 0.38  | -0.39 | -0.64 | - |
| 0.53     | -1.05      | -0.51      | -1.59 | -1.39 | -0.71 | -0.15 | 0.05  | -0.68 | -0.43 | 0.21  | 0.28  |       |   |
| GENE906X | 12279_at   | 12279_at   | 1     | -1    | -0.32 | -1.32 | -2.32 | -1.18 | -0.73 | -     |       |       |   |
| 1.55     | -0.71      | -0.35      | -0.21 | -0.12 | 0     | 0.18  | -0.35 | -0.35 | 0.32  | 0.38  | 0.13  | -0.25 | - |
| 0.2      | -0.78      | -0.21      | -0.59 | -1    | -0.26 | -0.59 | -0.26 | -0.64 | -0.2  | 0.37  | 0.53  |       |   |
| GENE905X | 20684_at   | 20684_at   | 1     | -1.12 | -0.68 | -3.05 | -3.47 | -1.69 | -1.64 | -     |       |       |   |
| 2.64     | -1.73      | -0.41      | 0.01  | 0.18  | 0.18  | 0     | -0.73 | -0.25 | 0.07  | 0.09  | -0.3  | -0.26 | - |
| 0.04     | -0.47      | -0.83      | -0.73 | -1.39 | -0.73 | -0.68 | -0.1  | -0.34 | 0     | 0.17  | 0.09  |       |   |
| GENE912X | 12011_s_at | 12011_s_at | 1     | -1.02 | -0.62 | -1.32 | -1.35 | -1.21 | -0.88 | -     |       |       |   |
| 0.94     | -0.64      | -0.51      | 0.26  | 0.02  | 0.01  | -0.26 | -0.53 | -0.26 | 0.02  | 0.31  | -0.45 | -0.32 | - |
| 0.15     | -0.59      | -0.66      | -0.51 | -0.28 | -0.1  | -0.25 | -0.05 | 0.01  | 0.09  | -0.07 | 0.13  |       |   |

|          |            |            |       |       |       |       |       |       |       |       |       |       |   |
|----------|------------|------------|-------|-------|-------|-------|-------|-------|-------|-------|-------|-------|---|
| GENE886X | 12781_at   | 12781_at   | 1     | -1.15 | -0.97 | -1.15 | -1.73 | -1.39 | -1.47 | -     |       |       |   |
| 1.18     | -1.25      | -0.23      | 0.48  | -0.35 | 0.09  | -0.08 | 0.08  | 0.04  | -0.04 | 0.26  | -0.51 | -0.71 | - |
| 0.47     | -0.59      | -0.71      | -0.62 | -0.39 | -0.01 | -0.05 | 0.07  | 0.02  | -0.08 | 0.01  | 0.13  |       |   |
| GENE608X | 15412_at   | 15412_at   | 1     | -0.66 | -0.21 | -0.73 | -0.81 | -1.02 | -0.51 | -     |       |       |   |
| 0.78     | -0.78      | -0.25      | 0.32  | 0.02  | 0.28  | 0.12  | -0.32 | 0.16  | 0.13  | 0.23  | -0.23 | -0.51 | - |
| 0.18     | -0.16      | -0.71      | -0.49 | -0.39 | -0.13 | -0.12 | -0.21 | -0.07 | 0.12  | -0.07 | 0.08  |       |   |
| GENE614X | 16508_at   | 16508_at   | 1     | -1.59 | -0.55 | -1.39 | -1.47 | -1.35 | -1.18 | -     |       |       |   |
| 1.05     | -1.12      | -0.02      | 0.47  | 0.17  | 0.63  | 0.38  | 0.11  | 0.21  | 0.15  | 0.32  | 0.02  | -0.76 | - |
| 0.34     | -0.88      | -0.86      | -0.86 | -0.83 | -0.41 | -0.59 | -0.23 | -0.13 | 0.02  | -0.07 | 0     |       |   |
| GENE613X | 14557_at   | 14557_at   | 1     | -1.88 | -0.47 | -1.78 | -1.55 | -1.64 | -1.43 | -     |       |       |   |
| 1.21     | -1.25      | -0.23      | 0.18  | 0.12  | 0.68  | 0.18  | 0.17  | 0.35  | 0.04  | -0.12 | 0.15  | -0.68 | - |
| 0.39     | -0.86      | -0.86      | -0.86 | -0.76 | -0.55 | -0.53 | -0.16 | -0.21 | 0.23  | -0.28 | -0.21 |       |   |
| GENE612X | 15771_at   | 15771_at   | 1     | -1.21 | -0.59 | -1.08 | -1.21 | -1.05 | -0.91 | -     |       |       |   |
| 0.91     | -0.73      | -0.02      | 0.12  | 0.13  | -0.05 | -0.01 | -0.1  | -0.23 | 0.26  | 0.22  | -0.18 | -0.55 | - |
| 0.12     | -0.59      | -0.47      | -0.94 | -0.81 | -0.32 | -0.23 | 0.07  | -0.04 | 0.41  | 0.11  | 0.08  |       |   |
| GENE611X | 14463_at   | 14463_at   | 1     | -1.59 | -0.88 | -1.64 | -1.64 | -1.32 | -1.15 | -     |       |       |   |
| 1.18     | -1.32      | -0.18      | 0.17  | 0.37  | 0.44  | 0.25  | 0.01  | 0.04  | 0.28  | 0.34  | -0.21 | -0.51 | - |
| 0.16     | -0.94      | -0.53      | -1.15 | -0.91 | -0.2  | -0.23 | 0.09  | -0.01 | 0.25  | -0.07 | 0.11  |       |   |
| GENE610X | 19454_at   | 19454_at   | 1     | -2.39 | -1.02 | -2.83 | -2.83 | -1.73 | -2.05 | -     |       |       |   |
| 1.73     | -1.88      | 0.04       | 0.23  | 0.01  | 0.16  | -0.07 | -0.23 | -0.35 | -0.18 | -0.07 | -0.41 | -0.76 | - |
| 0.32     | -1.21      | -1.15      | -1.47 | -1.08 | -0.43 | -0.25 | 0.28  | -0.05 | 0.07  | 0.35  | 0.4   |       |   |
| GENE609X | 20173_at   | 20173_at   | 1     | -2.47 | -1.73 | -2.55 | -2.73 | -2.12 | -2.32 | -     |       |       |   |
| 1.88     | -2         | -0.1       | 0.78  | 0.58  | 0.16  | -0.01 | -0.45 | 0.37  | 0.01  | 0.01  | -0.02 | -0.97 | - |
| 0.62     | -1.12      | -1         | -1.69 | -1.25 | -0.68 | -0.2  | -0.1  | -0.16 | 0.16  | -0.05 | -0.08 |       |   |
| GENE602X | 13335_at   | 13335_at   | 1     | -1.21 | -0.51 | -1.15 | -2.25 | -1.08 | -0.91 | -     |       |       |   |
| 1.47     | -1.47      | 0.18       | 0.17  | -0.2  | 0.23  | 0.27  | -0.07 | -0.49 | 0.4   | 0.73  | -0.59 | -1.08 | - |
| 0.37     | -0.81      | -0.35      | -1.08 | -0.97 | -0.49 | -0.81 | -0.78 | -0.3  | -0.02 | -0.21 | 0.17  |       |   |
| GENE607X | 12532_at   | 12532_at   | 1     | -1.51 | -1.12 | -2.64 | -2.39 | -2.25 | -2.32 | -     |       |       |   |
| 2.12     | -2.18      | -0.28      | 0.04  | -0.16 | 0.67  | 0.38  | 0.17  | -0.3  | 0.26  | 0.48  | -0.68 | -1.55 | - |
| 0.57     | -1.08      | -0.83      | -1.51 | -1.51 | -0.94 | -1.28 | -1.39 | -0.16 | -0.02 | -0.97 | -0.15 |       |   |
| GENE594X | 19907_at   | 19907_at   | 1     | -0.78 | -0.88 | -1.64 | -1.69 | -1.55 | -0.66 | -     |       |       |   |
| 1.43     | -1.35      | -0.13      | -0.26 | -0.55 | 0.23  | 0.2   | -0.15 | -0.39 | 0.35  | 0.2   | -0.23 | -1    | - |
| 0.23     | -0.68      | -0.41      | -1.08 | -1.35 | -0.59 | -0.81 | -0.47 | -0.28 | -0.08 | -0.12 | -0.15 |       |   |
| GENE601X | 11990_at   | 11990_at   | 1     | -0.39 | -0.45 | -1.15 | -1.78 | -1.35 | -1.08 | -     |       |       |   |
| 1.12     | -1.12      | -0.45      | -0.04 | -0.1  | 0.11  | 0.02  | -0.21 | -0.16 | 0.29  | 0.52  | -0.39 | -1.32 | - |
| 0.3      | -0.57      | -0.94      | -1.32 | -1.05 | -0.41 | -0.62 | -0.23 | 0.11  | -0.04 | -0.41 | -0.16 |       |   |
| GENE600X | 13036_at   | 13036_at   | 1     | -1.39 | -0.94 | -1.39 | -2.25 | -1.94 | -1.55 | -     |       |       |   |
| 1.83     | -1.28      | -0.01      | 0.36  | 0.16  | 0.13  | -0.08 | -0.45 | -0.32 | 0.13  | 0.25  | -0.25 | -1.25 | - |
| 0.73     | -0.68      | -1.25      | -1.88 | -1.69 | -1.02 | -0.55 | -1.35 | -0.07 | 0.16  | -0.21 | 0.15  |       |   |
| GENE593X | 15146_s_at | 15146_s_at | 1     | -1.59 | -1    | -2.55 | -2.94 | -2.12 | -2.12 | -     |       |       |   |
| 2.39     | -2.18      | -0.02      | 0.63  | 0.22  | 0.53  | 0.29  | -0.34 | 0.09  | 0.43  | 0.28  | -0.2  | -0.78 | - |
| 0.78     | -1.55      | -1.12      | -1.64 | -1.21 | -0.76 | -0.83 | 0.02  | -0.05 | -0.08 | 0.05  | 0.01  |       |   |
| GENE592X | 12387_at   | 12387_at   | 1     | -1.25 | -0.55 | -1.64 | -2.32 | -2.32 | -1.51 | -     |       |       |   |
| 1.69     | -1.78      | -0.16      | 0.31  | -0.13 | -0.1  | 0.26  | -0.51 | -0.07 | 0.54  | 0.49  | -0.08 | -0.88 | - |
| 0.88     | -0.88      | -1.28      | -1.32 | -1.32 | -1.21 | -0.97 | 0.16  | 0.26  | 0.15  | -0.13 | -0.08 |       |   |
| GENE591X | 16229_at   | 16229_at   | 1     | -2.47 | -1.88 | -2.94 | -3.18 | -3.32 | -3.18 | -     |       |       |   |
| 2.73     | -4.05      | -0.23      | 0.23  | 0.48  | 0.48  | 0.38  | -0.68 | -0.47 | 0.75  | 0.6   | -0.35 | -1.15 | - |
| 1.18     | -1.73      | -1.55      | -2.64 | -2.83 | -1.73 | -1.21 | -0.13 | 0.2   | 0.2   | -0.45 | 0.09  |       |   |
| GENE606X | 18694_s_at | 18694_s_at | 1     | -0.88 | -0.81 | -1.51 | -1.28 | -1.83 | -1.35 | -     |       |       |   |
| 1.21     | -1.15      | -0.57      | 0.18  | 0.04  | 0.27  | -0.04 | -0.05 | 0.07  | 0.17  | -0.26 | -0.1  | -0.73 | - |
| 0.68     | -0.62      | -0.97      | -0.86 | -0.68 | -0.26 | -0.86 | -0.35 | -0.35 | -0.07 | -0.28 | 0     |       |   |
| GENE605X | 12137_at   | 12137_at   | 1     | -1.08 | -0.88 | -1.83 | -1.47 | -1.94 | -2    | -     |       |       |   |
| 1.47     | -1.78      | -0.59      | -0.2  | -0.15 | 0.08  | -0.12 | -0.53 | -0.34 | 0.26  | 0.23  | -0.49 | -1.02 | - |
| 0.66     | -0.81      | -1.35      | -1.21 | -0.94 | -0.25 | -1.18 | -0.78 | -0.26 | -0.25 | -0.49 | 0.02  |       |   |
| GENE604X | 19358_at   | 19358_at   | 1     | -1.59 | -0.55 | -1.88 | -1.64 | -1.69 | -1.47 | -     |       |       |   |
| 1.94     | -1.94      | -0.39      | 0.05  | 0.08  | 0.31  | 0.17  | -0.59 | -0.07 | 0.22  | -0.13 | -0.43 | -0.68 | - |
| 0.53     | -0.71      | -1.28      | -1    | -1.12 | -0.34 | -0.49 | -0.35 | -0.25 | -0.25 | -0.23 | -0.15 |       |   |

|          |            |            |       |       |       |       |       |       |       |       |       |       |       |   |
|----------|------------|------------|-------|-------|-------|-------|-------|-------|-------|-------|-------|-------|-------|---|
| GENE603X | 19494_at   | 19494_at   | 1     | -2.39 | -1.12 | -3.05 | -2.94 | -3.05 | -2.73 | -     |       |       |       |   |
|          | 2.94       | -3.83      | -0.39 | 0.2   | 0.23  | 0.74  | 0.63  | -0.34 | -0.12 | 0.58  | -0.05 | -0.2  | -1.47 | - |
|          | 1.25       | -1.21      | -1.94 | -2.39 | -1.69 | -1.47 | -1.12 | -0.88 | -0.41 | -0.15 | -1    | -0.43 |       |   |
| GENE280X | 19900_at   | 19900_at   | 1     | -1.39 | -1.15 | -1.94 | -1.64 | -1.78 | -1.78 | -     |       |       |       |   |
|          | 1.88       | -2.18      | -0.57 | -0.43 | -0.04 | 0.08  | 0.11  | -0.04 | -0.45 | 0.15  | -0.05 | -0.43 | -0.83 | - |
|          | 0.26       | -0.64      | -0.97 | -1.28 | -1.35 | -0.34 | -0.73 | -0.32 | -0.51 | -0.08 | -0.02 | 0.15  |       |   |
| GENE478X | 12236_at   | 12236_at   | 1     | -2.18 | -1.08 | -2.55 | -2.25 | -2.83 | -3.05 | -     |       |       |       |   |
|          | 2.64       | -2.64      | -1.35 | 0.46  | -0.15 | 0.31  | -0.3  | -0.94 | 0.13  | -0.12 | -0.59 | -0.49 | -1.02 | - |
|          | 0.59       | -0.76      | -2    | -1.83 | -1.59 | -1.08 | -0.71 | -0.01 | -0.64 | -0.2  | -0.57 | 0.01  |       |   |
| GENE558X | 19752_s_at | 19752_s_at | 1     | -1.35 | -0.32 | -1.05 | -1.69 | -1.25 | -1.15 | -     |       |       |       |   |
|          | 1.05       | -1.18      | -0.55 | -0.26 | -0.16 | 0.01  | 0     | -0.73 | -0.3  | 0.17  | 0.04  | -0.64 | -1.15 | - |
|          | 0.37       | -0.62      | -0.73 | -1.05 | -1    | -0.43 | -0.43 | -0.16 | 0.2   | 0.23  | -0.2  | -0.15 |       |   |
| GENE557X | 15238_at   | 15238_at   | 1     | -2.47 | -1.73 | -2.64 | -5.05 | -3.05 | -3.32 | -     |       |       |       |   |
|          | 2.25       | -2.94      | -0.64 | -0.83 | -0.35 | -0.23 | -0.16 | -0.94 | -1.21 | 0.71  | 0.35  | -1.12 | -1.88 | - |
|          | 1.25       | -1.94      | -2.18 | -2    | -3.47 | -1.15 | -1.64 | -0.45 | 0.07  | -0.21 | -0.49 | 0.35  |       |   |
| GENE556X | 20204_at   | 20204_at   | 1     | -1.51 | -1.08 | -2.18 | -2.12 | -1.69 | -1.39 | -     |       |       |       |   |
|          | 1.47       | -1.43      | -0.64 | -0.78 | -0.28 | -0.41 | -0.28 | -0.76 | -0.76 | 0.15  | 0.07  | -0.45 | -0.94 | - |
|          | 0.68       | -0.78      | -1.02 | -1.43 | -1.18 | -0.43 | -0.86 | -0.66 | -0.23 | -0.25 | -0.59 | -0.26 |       |   |
| GENE555X | 18831_at   | 18831_at   | 1     | -1.73 | -0.97 | -2.18 | -2.25 | -1.94 | -1.73 | -     |       |       |       |   |
|          | 1.64       | -1.69      | -0.55 | -0.62 | -0.35 | -0.2  | -0.15 | -0.59 | -0.71 | 0     | 0.32  | -0.78 | -1.35 | - |
|          | 0.55       | -0.91      | -0.97 | -1.78 | -1.35 | -0.76 | -1.12 | -0.49 | -0.35 | -0.02 | -0.35 | 0.16  |       |   |
| GENE554X | 19446_i_at | 19446_i_at | 1     | -1.51 | -1.28 | -1.78 | -2.55 | -2.25 | -2.05 | -     |       |       |       |   |
|          | 1.73       | -1.88      | -0.34 | -0.45 | -0.26 | -0.37 | -0.41 | -0.94 | -0.73 | -0.16 | 0.01  | -0.68 | -1.05 | - |
|          | 0.57       | -0.83      | -1.35 | -1.83 | -1.73 | -0.94 | -0.86 | -0.76 | 0.17  | -0.41 | -0.45 | -0.08 |       |   |
| GENE553X | 14421_at   | 14421_at   | 1     | -1.51 | -1.08 | -2.25 | -2.32 | -2.32 | -1.94 | -     |       |       |       |   |
|          | 1.08       | -1.55      | -0.23 | -0.3  | -0.26 | -0.3  | -0.28 | -1.08 | -0.59 | -0.18 | 0.01  | -0.73 | -1.12 | - |
|          | 0.86       | -1.39      | -1.69 | -1.64 | -1.21 | -0.47 | -0.57 | -0.25 | -0.15 | 0.05  | -0.68 | -0.08 |       |   |
| GENE552X | 17592_at   | 17592_at   | 1     | -1.21 | -0.86 | -1.35 | -1.28 | -1.47 | -1.59 | -     |       |       |       |   |
|          | 0.66       | -1.25      | -0.08 | -0.18 | 0.04  | -0.02 | -0.13 | -0.41 | -0.41 | -0.05 | 0.07  | -0.23 | -0.71 | - |
|          | 0.53       | -0.39      | -0.53 | -0.97 | -1.12 | -0.71 | -0.55 | -0.16 | -0.15 | 0.18  | -0.55 | -0.23 |       |   |
| GENE551X | 15928_at   | 15928_at   | 1     | -1.83 | -1.25 | -2.55 | -2.12 | -2.32 | -2.39 | -     |       |       |       |   |
|          | 1.73       | -2.05      | -0.62 | 0.17  | -0.08 | 0.15  | 0.15  | -1.12 | -0.25 | -0.02 | -0.08 | -0.57 | -1.69 | - |
|          | 1.02       | -1.39      | -1.28 | -1.73 | -1.73 | -1.32 | -0.49 | -0.91 | -0.37 | -0.35 | -0.51 | -0.21 |       |   |
| GENE550X | 15057_at   | 15057_at   | 1     | -1.59 | -0.62 | -1.69 | -2.12 | -2.55 | -2.55 | -     |       |       |       |   |
|          | 1.21       | -1.25      | -0.55 | -0.34 | -0.37 | -0.02 | -0.2  | -0.81 | -0.97 | 0.09  | -0.08 | -0.62 | -0.76 | - |
|          | 0.86       | -1         | -1.28 | -1.32 | -1.59 | -1.02 | -0.76 | -0.18 | -0.1  | -0.3  | -0.18 | -0.02 |       |   |
| GENE549X | 14430_g_at | 14430_g_at | 1     | -2.25 | -1.51 | -2.55 | -2.18 | -3.18 | -3.18 | -2    |       |       |       |   |
|          | -1.83      | -1.21      | -0.64 | -0.1  | -0.21 | -0.28 | -0.83 | -1.43 | -0.15 | 0.11  | -0.86 | -0.78 | -     |   |
|          | 0.81       | -1.21      | -1.64 | -1.64 | -1.43 | -0.64 | -1.02 | -0.83 | -0.51 | -0.12 | -0.43 | -0.12 |       |   |
| GENE564X | 12813_at   | 12813_at   | 1     | -1.08 | -0.43 | -1.21 | -1.59 | -1.25 | -1.12 | -     |       |       |       |   |
|          | 0.91       | -1.15      | -0.51 | -0.15 | -0.1  | 0.15  | 0.05  | -0.45 | -0.3  | 0.18  | -0.34 | -0.68 | -0.73 | - |
|          | 0.88       | -0.49      | -0.76 | -0.59 | -0.66 | -0.3  | -0.59 | 0.01  | -0.01 | 0     | -0.57 | -0.35 |       |   |
| GENE563X | 12485_at   | 12485_at   | 1     | -1.43 | -1    | -1.73 | -2.05 | -1.47 | -1.55 | -     |       |       |       |   |
|          | 0.86       | -1.18      | -0.3  | -0.62 | -0.15 | 0     | -0.05 | -0.26 | -0.51 | 0.01  | -0.39 | -0.34 | -0.45 | - |
|          | 0.64       | -0.47      | -0.83 | -0.64 | -0.71 | -0.3  | -0.49 | -0.07 | -0.04 | -0.02 | -0.57 | -0.41 |       |   |
| GENE267X | 18327_at   | 18327_at   | 1     | -1.21 | -0.78 | -0.94 | -1.94 | -1.18 | -0.94 | -     |       |       |       |   |
|          | 1.28       | -0.94      | -0.15 | 0.12  | -0.04 | 0.13  | 0.01  | -0.05 | -0.23 | 0.02  | -0.02 | -0.2  | -0.39 | - |
|          | 0.25       | -0.49      | -0.53 | -0.73 | -0.59 | -0.47 | -0.37 | -0.07 | -0.13 | 0     | -0.34 | -0.18 |       |   |
| GENE266X | 18215_at   | 18215_at   | 1     | -3.05 | -2.94 | -3.64 | -4.64 | -3.05 | -3.32 | -     |       |       |       |   |
|          | 3.05       | -2.64      | -0.35 | -0.62 | -0.12 | -0.12 | -0.26 | -1    | -1.25 | -0.07 | -0.64 | -0.76 | -1.18 | - |
|          | 1.05       | -1.51      | -1.59 | -2.12 | -2.12 | -0.71 | -2.64 | -1.05 | -0.23 | -0.23 | -1    | -0.12 |       |   |
| GENE265X | 20443_s_at | 20443_s_at | 1     | -3.18 | -3.64 | -5.05 | -5.64 | -3.47 | -3.47 | -     |       |       |       |   |
|          | 4.64       | -3.83      | -0.47 | -0.12 | -0.08 | 0.12  | -0.21 | -1.12 | -1    | 0.02  | -0.25 | -0.78 | -0.94 | - |
|          | 1.69       | -1.94      | -1.83 | -3.64 | -4.32 | -1.32 | -2.39 | -0.21 | -0.04 | -0.1  | -1.21 | -0.39 |       |   |
| GENE264X | 17018_s_at | 17018_s_at | 1     | -2.47 | -2.83 | -4.32 | -4.64 | -3.64 | -3.47 | -     |       |       |       |   |
|          | 3.83       | -3.05      | -0.39 | -0.53 | -0.34 | -0.28 | -0.43 | -0.97 | -1.15 | -0.01 | -0.35 | -0.97 | -0.86 | - |
|          | 1.12       | -1.47      | -1.35 | -2.39 | -2.55 | -1    | -1.78 | -0.15 | -0.08 | -0.16 | -0.64 | -0.08 |       |   |

|           |            |            |       |       |       |       |       |       |       |       |
|-----------|------------|------------|-------|-------|-------|-------|-------|-------|-------|-------|
| GENE263X  | 20442_i_at | 20442_i_at | 1     | -2.83 | -3.83 | -5.64 | -6.65 | -5.05 | -4.64 | -     |
|           | 3.83       | -4.05      | -0.68 | -0.23 | -0.12 | 0.01  | -0.32 | -0.73 | -1.28 | 0     |
|           | 1.51       | -1.73      | -2.25 | -2.55 | -3.05 | -1.18 | -2.55 | 0.05  | 0.22  | 0.05  |
| GENE1143X | 17439_g_at | 17439_g_at | 1     | -2.83 | -1.39 | -1.59 | -1.73 | -1.51 | -1.73 | -     |
|           | 1.94       | -1.94      | -0.21 | 0.01  | 0.17  | 0.11  | 0.04  | -0.57 | -0.12 | 0.05  |
|           | 0.88       | -1         | -1    | -1.35 | -1.59 | -0.81 | -0.62 | -0.41 | -0.37 | -0.18 |
| GENE599X  | 12235_at   | 12235_at   | 1     | -2.05 | -1.21 | -2.18 | -2.55 | -1.32 | -1.21 | -     |
|           | 2.47       | -2.64      | 0.07  | 0.22  | 0.4   | 0.4   | 0.27  | -1    | 0.13  | 0.4   |
|           | 1.18       | -1.18      | -0.97 | -1.78 | -2.32 | -1.08 | -0.66 | -0.68 | -0.28 | -0.41 |
| GENE598X  | 20062_at   | 20062_at   | 1     | -1.39 | -0.73 | -1.73 | -1.51 | -1.15 | -0.94 | -     |
|           | 1.83       | -1.64      | -0.41 | -0.07 | 0.08  | 0.33  | 0.05  | -0.39 | -0.02 | 0.29  |
|           | 0.59       | -1.05      | -1.02 | -1.25 | -1.05 | -0.28 | -0.83 | -0.83 | -0.49 | -0.13 |
| GENE597X  | 11991_g_at | 11991_g_at | 1     | -1.18 | -1.02 | -1.64 | -1.47 | -1.73 | -1.39 | -     |
|           | 1.73       | -1.83      | -0.28 | -0.34 | 0.33  | -0.12 | -0.12 | -0.66 | -0.43 | 0.41  |
|           | 0.57       | -1.08      | -0.91 | -1.64 | -1.43 | -0.86 | -0.86 | -0.91 | -0.28 | 0.08  |
| GENE596X  | 12811_at   | 12811_at   | 1     | -0.78 | -0.35 | -0.86 | -1    | -1.05 | -0.97 | -     |
|           | 0.71       | -1         | -0.3  | -0.04 | -0.1  | 0.29  | 0.22  | -0.37 | -0.35 | 0.29  |
|           | 0.62       | -0.51      | -0.62 | -0.91 | -1.12 | -0.64 | -0.66 | 0.02  | 0.11  | 0.09  |
| GENE595X  | 19361_s_at | 19361_s_at | 1     | -1.18 | -0.53 | -1.47 | -1.51 | -1.21 | -0.97 | -     |
|           | 1.05       | -1.35      | -0.12 | -0.66 | 0.2   | 0.13  | 0.2   | -0.34 | -0.57 | 0.42  |
|           | 0.47       | -0.66      | -0.73 | -1.25 | -1.39 | -0.51 | -0.68 | -0.2  | -0.07 | 0.05  |
| GENE306X  | 12955_at   | 12955_at   | 1     | -0.76 | -0.51 | -0.78 | -1.28 | -1.02 | -0.91 | -     |
|           | 1.12       | -1.35      | -0.51 | -0.15 | -0.02 | -0.16 | -0.21 | -0.88 | -0.3  | 0.22  |
|           | 0.1        | -0.45      | -0.51 | -1.12 | -1.08 | -0.71 | -0.3  | -0.04 | -0.26 | -0.02 |
| GENE303X  | 13404_at   | 13404_at   | 1     | -1.69 | -1.18 | -2.47 | -2.64 | -2.39 | -2.39 | -     |
|           | 2.32       | -2.32      | -0.57 | -0.05 | -0.43 | -0.1  | -0.34 | -0.86 | -0.59 | 0.07  |
|           | 0.73       | -0.73      | -1.28 | -2.39 | -2.39 | -1.59 | -0.78 | -0.16 | -0.21 | -0.07 |
| GENE302X  | 14022_s_at | 14022_s_at | 1     | -1.69 | -1.51 | -3.32 | -3.18 | -2.94 | -2.94 | -     |
|           | 3.32       | -2.83      | -1.05 | -0.73 | -0.49 | 0.21  | -0.2  | -1.02 | -1.12 | 0.59  |
|           | 0.91       | -0.88      | -1.47 | -2.64 | -2.39 | -1.83 | -1.55 | -0.51 | 0.02  | 0.25  |
| GENE304X  | 18769_at   | 18769_at   | 1     | -1.05 | -0.55 | -1.28 | -1.64 | -1.59 | -1    | -     |
|           | 1.43       | -1.83      | -0.32 | -0.28 | -0.23 | 0.02  | -0.12 | -1.12 | -0.68 | 0.07  |
|           | 0.28       | -0.64      | -0.59 | -1.25 | -1    | -0.76 | -0.53 | -0.28 | -0.12 | -0.07 |
| GENE305X  | 15478_at   | 15478_at   | 1     | -0.86 | -0.34 | -1.18 | -1.21 | -1.02 | -0.76 | -     |
|           | 1.12       | -0.97      | -0.25 | -0.26 | -0.32 | 0.05  | -0.2  | -0.59 | -0.28 | 0.13  |
|           | 0.47       | -0.47      | -0.28 | -0.94 | -0.94 | -0.45 | -0.62 | -0.16 | -0.16 | 0     |
| GENE205X  | 12576_at   | 12576_at   | 1     | -2.12 | -1.32 | -2.25 | -2.47 | -1.73 | -1.59 | -     |
|           | 1.94       | -2.25      | -0.05 | -0.28 | -0.15 | -0.32 | -0.26 | -1.05 | -0.64 | 0.15  |
|           | 0.68       | -1.12      | -0.62 | -1.69 | -1.51 | -0.59 | -0.59 | -0.47 | -0.2  | 0.07  |
| GENE204X  | 16595_s_at | 16595_s_at | 1     | -2.18 | -1.43 | -2    | -2.39 | -2.12 | -1.94 | -     |
|           | 2.47       | -2.55      | -0.35 | -0.66 | -0.25 | -0.47 | -0.57 | -1.12 | -0.76 | 0.08  |
|           | 0.97       | -1.18      | -0.91 | -2    | -1.83 | -1.08 | -1    | -0.47 | -0.25 | -0.15 |
| GENE911X  | 20058_at   | 20058_at   | 1     | -2.18 | -1.25 | -1.73 | -1.78 | -1.08 | -1.18 | -     |
|           | 1.39       | -1.59      | -0.34 | -0.12 | 0     | -0.18 | -0.43 | -1.25 | -0.59 | -0.49 |
|           | 0.76       | -0.81      | -0.57 | -1.21 | -1.15 | -0.49 | 0.17  | 0.56  | -0.23 | 0.36  |
| GENE910X  | 16042_s_at | 16042_s_at | 1     | -2.18 | -2.32 | -1.73 | -2.32 | -1.94 | -1.78 | -     |
|           | 2.18       | -1.83      | 0.2   | 0.13  | 0.01  | -0.71 | -0.59 | -0.64 | -0.62 | -0.41 |
|           |            | -1.25      | -0.83 | -1.35 | -0.94 | -0.37 | 0     | -0.04 | 0.09  | 0.21  |
| GENE909X  | 13601_at   | 13601_at   | 1     | -2    | -1.28 | -2.32 | -2.55 | -1.64 | -1.12 | -     |
|           | 2.25       | -1.78      | -0.25 | 0.36  | 0.27  | -0.02 | -0.08 | -0.76 | -0.02 | -0.02 |
|           | 0.78       | -0.91      | -0.55 | -1.21 | -1.51 | -0.94 | -0.23 | 0.38  | 0.22  | 0.2   |
| GENE582X  | 16631_s_at | 16631_s_at | 1     | -1.55 | -1.28 | -3.18 | -2.39 | -2.12 | -1.78 | -2    |
|           |            | -2         | -0.41 | 0.07  | -0.32 | -0.51 | -0.53 | -0.59 | -0.16 | 0.11  |
|           | 0.76       | -0.62      | -0.51 | -1.78 | -1.39 | -1.02 | -0.97 | 0.23  | 0.01  | 0.28  |
| GENE310X  | 13124_at   | 13124_at   | 1     | -1.02 | -1.43 | -1.88 | -1.39 | -1.64 | -1.43 | -     |
|           | 1.69       | -1.88      | -0.57 | 0.2   | 0.01  | -0.13 | -0.3  | -0.71 | -0.26 | 0.15  |
|           | 0.78       | -0.62      | -0.47 | -0.91 | -1.35 | -0.76 | -0.39 | 0.05  | -0.04 | 0.05  |

|           |            |            |       |       |       |       |       |       |       |       |       |       |   |
|-----------|------------|------------|-------|-------|-------|-------|-------|-------|-------|-------|-------|-------|---|
| GENE1162X | 16942_at   | 16942_at   | 1     | -1.28 | -0.62 | -1.39 | -1.39 | -1.12 | -1    | -     |       |       |   |
| 0.68      | -1.25      | -0.49      | -0.39 | -0.39 | -0.3  | -0.45 | -0.55 | -0.62 | -0.02 | -0.18 | -0.57 | -0.3  | - |
| 0.15      | -0.37      | -0.62      | -0.91 | -1.12 | -0.83 | -0.2  | 0.29  | 0.16  | 0.05  | -0.08 | -0.1  |       |   |
| GENE1161X | 15689_at   | 15689_at   | 1     | -1.59 | -1.08 | -2.25 | -1.39 | -1.88 | -1.59 | -     |       |       |   |
| 0.97      | -1.69      | -0.39      | -0.51 | -0.34 | -0.28 | -0.47 | -0.78 | -0.73 | 0.12  | -0.12 | -0.07 | -0.55 | - |
| 0.57      | -0.66      | -0.51      | -1.15 | -1.21 | -0.91 | -0.53 | 0.01  | 0.22  | -0.12 | -0.3  | -0.1  |       |   |
| GENE581X  | 16081_s_at | 16081_s_at | 1     | -1.83 | -1.15 | -3.47 | -2.64 | -2.47 | -1.51 | -     |       |       |   |
| 1.88      | -1.59      | -0.59      | -0.51 | -0.32 | -0.76 | -0.78 | -1.08 | -0.88 | -0.04 | -0.53 | -0.2  | -0.88 | - |
| 0.88      | -1.21      | -1.02      | -1.78 | -1.83 | -1.51 | -0.91 | -0.2  | -0.47 | -0.25 | -0.39 | -0.04 |       |   |
| GENE145X  | 20024_s_at | 20024_s_at | 1     | -1.59 | -1.12 | -3.05 | -2.64 | -2    | -1.59 | -     |       |       |   |
| 1.21      | -1.47      | -0.73      | -0.59 | -0.32 | -0.49 | -0.55 | -0.57 | -1.05 | -0.25 | -0.05 | -0.53 | -0.83 | - |
| 0.76      | -1.15      | -1.15      | -1.59 | -1.39 | -0.68 | -0.78 | 0.07  | 0     | 0.16  | -0.62 | -0.26 |       |   |
| GENE144X  | 19627_s_at | 19627_s_at | 1     | -2.18 | -1.55 | -3.32 | -3.47 | -3.05 | -2.64 | -     |       |       |   |
| 1.88      | -2.25      | -0.51      | -0.78 | -0.57 | -0.53 | -0.62 | -0.94 | -1.59 | -0.32 | -0.76 | -0.73 | -1.21 | - |
| 0.78      | -1.47      | -1.43      | -1.83 | -1.73 | -0.97 | -1.39 | -0.76 | 0.07  | -0.1  | -0.64 | -0.12 |       |   |
| GENE153X  | 18369_at   | 18369_at   | 1     | -2.94 | -1.83 | -2.83 | -2.94 | -2.94 | -2.18 | -     |       |       |   |
| 2.25      | -1.88      | -0.73      | -0.78 | -0.76 | -0.45 | -0.49 | -0.83 | -1.51 | -0.32 | -0.32 | -0.91 | -1.02 | - |
| 0.94      | -1.51      | -1.32      | -2.47 | -2.18 | -1.59 | -0.43 | -0.41 | -0.35 | -0.57 | -0.04 | -0.02 |       |   |
| GENE152X  | 13651_at   | 13651_at   | 1     | -2.55 | -2.18 | -3.32 | -3.05 | -3.32 | -2.94 | -     |       |       |   |
| 2.64      | -2.32      | -0.94      | -0.49 | -0.39 | -0.45 | -0.62 | -1.05 | -0.88 | 0.01  | -0.62 | -0.55 | -1.51 | - |
| 1.43      | -1.83      | -1.73      | -2.25 | -2.25 | -1.51 | -1.39 | -0.71 | -0.39 | -0.23 | -0.16 | -0.07 |       |   |
| GENE151X  | 14387_g_at | 14387_g_at | 1     | -2.94 | -3.05 | -3.83 | -3.83 | -4.05 | -3.18 | -     |       |       |   |
| 2.47      | -2.73      | -0.83      | -0.62 | -0.68 | -0.66 | -0.83 | -1.25 | -1    | -0.39 | -0.59 | -0.97 | -1.21 | - |
| 1.88      | -1.47      | -1.73      | -3.18 | -2.32 | -1.05 | -1.12 | -0.41 | -0.45 | -0.55 | -0.68 | -0.21 |       |   |
| GENE150X  | 18471_at   | 18471_at   | 1     | -4.05 | -2.64 | -4.32 | -4.64 | -4.32 | -3.64 | -     |       |       |   |
| 3.32      | -3.64      | -1.39      | -1.21 | -0.39 | -0.71 | -0.88 | -1.64 | -1.51 | -0.07 | -0.55 | -0.91 | -1.15 | - |
| 1.08      | -1.51      | -2.32      | -3.32 | -2.39 | -1.47 | -1.47 | -0.21 | 0     | -0.18 | -0.55 | -0.01 |       |   |
| GENE149X  | 14386_at   | 14386_at   | 1     | -3.05 | -2.39 | -3.32 | -4.64 | -3.64 | -3.18 | -     |       |       |   |
| 2.05      | -2.18      | -1.25      | -0.47 | -1.25 | -0.51 | -0.78 | -0.97 | -0.57 | -0.68 | -0.53 | -1.25 | -1.51 | - |
| 0.97      | -1.94      | -1.73      | -2.64 | -2.73 | -1.47 | -1.02 | -0.39 | -0.07 | -0.26 | -0.55 | -0.08 |       |   |
| GENE270X  | 14429_at   | 14429_at   | 1     | -2.55 | -2.83 | -3.83 | -3.83 | -3.05 | -2.39 | -     |       |       |   |
| 2.47      | -3.32      | -0.78      | -0.83 | -0.3  | -0.64 | -0.62 | -0.78 | -1.59 | -0.15 | -0.12 | -0.57 | -0.47 | - |
| 0.57      | -1.28      | -1.02      | -2.12 | -1.51 | -0.71 | -0.91 | -0.53 | -0.59 | -0.41 | -0.47 | -0.2  |       |   |
| GENE269X  | 18994_at   | 18994_at   | 1     | -2.55 | -2.39 | -3.64 | -4.32 | -3.47 | -3.18 | -     |       |       |   |
| 2.55      | -2.73      | -0.57      | -0.71 | -0.55 | -0.86 | -0.83 | -0.88 | -0.83 | -0.18 | -0.02 | -0.78 | -1.08 | - |
| 0.41      | -1.69      | -1.47      | -2.05 | -1.83 | -0.97 | -0.76 | -0.02 | -0.16 | -0.21 | -0.05 | 0.25  |       |   |
| GENE268X  | 14432_at   | 14432_at   | 1     | -3.83 | -3.83 | -4.05 | -4.64 | -4.05 | -3.83 | -     |       |       |   |
| 3.32      | -3.32      | -0.78      | -1.47 | -0.62 | -1.39 | -1.51 | -1    | -1.39 | -0.21 | 0.26  | -1.05 | -1.47 | - |
| 0.91      | -2.64      | -2         | -2.32 | -1.73 | -0.57 | -0.57 | -0.78 | -0.68 | -0.55 | 0.05  | 0.07  |       |   |
| GENE274X  | 19359_at   | 19359_at   | 1     | -1.94 | -1.47 | -2.12 | -2.18 | -2.18 | -2.32 | -     |       |       |   |
| 1.73      | -1.88      | -0.47      | -0.15 | -0.37 | -0.28 | -0.34 | -0.34 | -0.76 | -0.25 | 0.04  | -0.86 | -1    | - |
| 0.68      | -1.15      | -0.94      | -1.55 | -1.39 | -0.73 | -0.26 | 0     | -0.08 | -0.12 | -0.39 | -0.23 |       |   |
| GENE273X  | 17438_at   | 17438_at   | 1     | -1.73 | -1.47 | -1.94 | -2.18 | -1.55 | -1.55 | -     |       |       |   |
| 1.39      | -1.55      | -0.05      | -0.04 | -0.04 | -0.16 | -0.23 | -0.21 | -0.49 | 0.09  | -0.05 | -0.18 | -0.88 | - |
| 0.76      | -0.94      | -0.86      | -1    | -1.08 | -0.45 | -0.49 | -0.13 | -0.12 | -0.05 | -0.21 | -0.18 |       |   |
| GENE272X  | 12727_f_at | 12727_f_at | 1     | -4.64 | -3.47 | -4.64 | -5.05 | -4.32 | -4.32 | -     |       |       |   |
| 3.83      | -3.47      | -0.62      | -1.05 | -0.05 | -0.47 | -0.34 | -0.71 | -1.73 | 0.08  | -0.15 | -1.47 | -1.55 | - |
| 2.12      | -2.64      | -1.05      | -2.73 | -2.39 | -0.66 | -0.73 | -0.49 | -0.07 | -0.34 | -0.37 | 0     |       |   |
| GENE254X  | 15932_at   | 15932_at   | 1     | -2.55 | -2.55 | -2.39 | -2.83 | -2.18 | -2.18 | -     |       |       |   |
| 1.73      | -1.78      | -0.55      | -0.68 | -0.47 | -0.28 | -0.04 | -0.71 | -0.55 | -0.16 | -0.08 | -0.55 | -0.91 | - |
| 0.81      | -1.21      | -0.78      | -1.88 | -1.64 | -1.05 | -0.35 | -0.73 | -0.28 | -0.55 | -0.28 | -0.28 |       |   |
| GENE190X  | 13596_at   | 13596_at   | 1     | -2.83 | -2.12 | -4.05 | -3.18 | -2.39 | -2.32 | -     |       |       |   |
| 2.39      | -2.05      | 0          | -0.45 | -0.26 | -0.51 | -0.47 | -0.23 | -0.86 | -0.15 | -0.16 | -0.51 | -1.32 | - |
| 0.64      | -1.25      | -0.64      | -1.55 | -1.35 | -0.45 | -0.86 | -0.32 | -0.25 | 0.15  | -0.49 | -0.3  |       |   |
| GENE146X  | 14596_at   | 14596_at   | 1     | -2.39 | -2.18 | -3.83 | -3.05 | -2.32 | -2.05 | -     |       |       |   |
| 1.73      | -1.47      | -0.57      | -1.08 | -0.45 | -1    | -0.86 | -0.78 | -1.35 | -0.02 | -0.08 | -1.08 | -1.12 | - |
| 0.94      | -0.83      | -1.28      | -1.78 | -1.59 | -0.81 | -0.76 | -0.35 | 0     | -0.05 | -0.25 | -0.21 |       |   |

|          |            |            |       |       |       |       |       |       |       |       |       |       |       |    |
|----------|------------|------------|-------|-------|-------|-------|-------|-------|-------|-------|-------|-------|-------|----|
| GENE217X | 15380_at   | 15380_at   | 1     | -3.18 | -2    | -2.64 | -3.32 | -2.39 | -2.64 | -     |       |       |       |    |
|          | 2.94       | -2.05      | -0.18 | -1.18 | -0.35 | -0.83 | -0.41 | -0.64 | -1.08 | 0.05  | -0.34 | -0.39 | -1.12 | -  |
|          | 1.25       | -2.05      | -0.71 | -3.18 | -1.51 | -1    | -0.18 | -0.68 | -0.49 | -0.28 | -0.25 | -0.49 |       |    |
| GENE216X | 20524_at   | 20524_at   | 1     | -3.05 | -3.47 | -4.64 | -5.64 | -3.32 | -2.94 | -     |       |       |       |    |
|          | 3.83       | -3.18      | -0.25 | -0.88 | -0.62 | -2.12 | -0.94 | -0.45 | -1.59 | -0.21 | -0.71 | -0.78 | -0.97 | -  |
|          | 1.78       | -3.32      | -1.47 | -4.32 | -4.05 | -1.94 | -2.25 | -0.45 | -0.2  | -0.25 | -0.07 | 0.41  |       |    |
| GENE855X | 18264_at   | 18264_at   | 1     | -1.51 | -0.97 | -1.55 | -1.55 | -1.35 | -1    | -     |       |       |       |    |
|          | 1.28       | -1.12      | -0.39 | -0.13 | -0.34 | -0.02 | -0.13 | -0.07 | 0.04  | -0.3  | -0.08 | -0.43 | -0.13 | -  |
|          | 0.16       | -0.32      | -0.51 | -0.39 | -0.25 | 0.09  | 0.15  | -0.12 | -0.39 | -0.18 | -0.02 | 0.02  |       |    |
| GENE854X | 14912_at   | 14912_at   | 1     | -2.64 | -1.32 | -2.94 | -2.25 | -2.55 | -1.94 | -     |       |       |       |    |
|          | 1.83       | -2.25      | 0.04  | -0.15 | 0.36  | -0.23 | -0.45 | -0.86 | -0.34 | 0.01  | 0.28  | -0.08 | -0.59 | -  |
|          |            | 0.02       | -0.18 | -0.81 | -0.68 | -0.83 | -0.34 | 0.22  | -0.21 | -0.28 | -0.47 | -0.1  | -0.21 | -  |
| GENE476X | 17395_s_at | 17395_s_at | 1     | -1.25 | -0.55 | -0.91 | -1.15 | -1.51 | -1.08 | -     |       |       |       |    |
|          | 1.02       | -1.35      | -0.47 | 0.05  | 0.16  | -0.08 | -0.18 | -0.41 | -0.08 | -0.04 | -0.04 | -0.3  | -0.02 | 0  |
|          |            | -0.32      | -0.55 | -0.62 | -0.35 | 0.08  | -0.21 | -0.23 | -0.18 | -0.1  | 0.02  | -0.07 |       |    |
| GENE475X | 13209_s_at | 13209_s_at | 1     | -1.88 | -1.83 | -2.64 | -2.39 | -3.05 | -2.73 | -     |       |       |       |    |
|          | 2.47       | -2.64      | -1    | 0.36  | -0.18 | -0.47 | -0.83 | -0.32 | -0.04 | -0.01 | -0.15 | -0.18 | -0.3  | -  |
|          | 0.1        | -0.86      | -1.73 | -0.71 | -1.21 | -0.26 | -0.59 | -0.37 | -0.39 | -0.26 | 0.15  | 0.32  |       |    |
| GENE412X | 14714_s_at | 14714_s_at | 1     | -1.05 | -1.15 | -0.91 | -1.39 | -1.43 | -1.55 | -     |       |       |       |    |
|          | 1.15       | -1.18      | -0.1  | -0.26 | -0.45 | -0.49 | -0.34 | -0.43 | -0.49 | -0.21 | -0.28 | -0.49 | -0.81 | -  |
|          | 0.43       | -0.57      | -0.88 | -0.57 | -0.26 | -0.01 | -0.18 | -0.16 | -0.18 | -0.34 | 0     | 0.08  |       |    |
| GENE411X | 18521_at   | 18521_at   | 1     | -0.97 | -0.97 | -1    | -1.43 | -1.18 | -1.25 | -     |       |       |       |    |
|          | 1.32       | -1.15      | -0.51 | -0.12 | -0.35 | -0.25 | -0.2  | -0.64 | -0.43 | -0.21 | -0.13 | -0.66 | -0.81 | -  |
|          | 0.21       | -0.51      | -0.73 | -0.88 | -0.57 | -0.41 | 0.01  | 0.05  | -0.08 | -0.04 | 0.17  | 0.01  |       |    |
| GENE410X | 13876_at   | 13876_at   | 1     | -2.94 | -2.18 | -2.05 | -3.18 | -3.47 | -3.47 | -     |       |       |       |    |
|          | 2.47       | -2.47      | -1.05 | -0.57 | -1.12 | -1.21 | -0.94 | -1.43 | -0.83 | -0.94 | -0.49 | -1.05 | -0.91 | -  |
|          | 0.08       | -1.73      | -1.94 | -1.51 | -1.32 | -1.08 | 0.23  | -0.66 | -0.32 | -0.21 | 0.43  | 0.07  |       |    |
| GENE167X | 13904_s_at | 13904_s_at | 1     | -1.08 | -0.86 | -1.64 | -1.78 | -1.05 | -1.12 | -     |       |       |       |    |
|          | 1.05       | -1.35      | -0.32 | -0.39 | -0.35 | -0.21 | -0.3  | -0.53 | -0.51 | -0.08 | -0.08 | -0.64 | -0.62 | -  |
|          | 0.34       | -0.78      | -0.64 | -1.08 | -0.81 | -0.28 | -0.23 | -0.41 | -0.35 | -0.21 | -0.08 | 0     |       |    |
| GENE166X | 12614_at   | 12614_at   | 1     | -2.73 | -1.64 | -3.05 | -3.18 | -2.32 | -2.64 | -     |       |       |       |    |
|          | 2.64       | -3.32      | -0.68 | -1    | -0.66 | -0.32 | -0.25 | -0.97 | -0.71 | -0.25 | -0.55 | -0.91 | -0.94 | -  |
|          | 0.39       | -1.64      | -1.02 | -1.55 | -1.25 | -0.55 | -0.64 | -0.91 | -0.47 | -0.51 | 0.08  | 0.23  |       |    |
| GENE165X | 12102_at   | 12102_at   | 1     | -1.78 | -1.15 | -1.83 | -1.78 | -1.64 | -1.59 | -     |       |       |       |    |
|          | 1.69       | -1.43      | -0.21 | -0.66 | -0.41 | -0.41 | -0.35 | -0.55 | -0.66 | -0.05 | 0.26  | -0.53 | -0.66 | -  |
|          | 0.78       | -0.97      | -1    | -1.02 | -1.08 | -0.25 | -0.39 | -0.57 | -0.35 | -0.39 | -0.25 | -0.05 |       |    |
| GENE164X | 19997_at   | 19997_at   | 1     | -2.32 | -1.51 | -1.83 | -2.39 | -1.88 | -2    | -     |       |       |       |    |
|          | 1.15       | -2         | -0.2  | -0.59 | -0.53 | -0.49 | -0.45 | -0.86 | -0.68 | -0.26 | -0.39 | -0.86 | -0.83 | -  |
|          | 0.68       | -1.28      | -0.66 | -1.39 | -1.08 | -0.35 | -0.41 | -0.62 | -0.34 | -0.39 | -0.16 | -0.13 |       |    |
| GENE163X | 12242_at   | 12242_at   | 1     | -3.83 | -2.12 | -3.18 | -3.32 | -2.55 | -2.12 | -     |       |       |       |    |
|          | 2.39       | -2.25      | -0.45 | -0.91 | -0.86 | -0.57 | -0.64 | -0.71 | -0.91 | -0.16 | -0.16 | -1.32 | -1    | -  |
|          | 1.08       | -1.78      | -0.88 | -1.47 | -1.28 | -0.66 | -0.59 | -0.59 | -0.55 | -0.47 | 0.15  | -0.18 |       |    |
| GENE162X | 12243_at   | 12243_at   | 1     | -3.64 | -1.83 | -2.73 | -3.64 | -3.05 | -2.94 | -     |       |       |       |    |
|          | 2.25       | -1.94      | -0.81 | -1.05 | -0.3  | -0.28 | -0.64 | -1.25 | -1.05 | -0.18 | -0.1  | -1.83 | -0.83 | -  |
|          | 1.08       | -1.39      | -1.25 | -1.25 | -1.32 | -0.68 | -0.78 | -0.88 | -0.45 | -0.71 | 0.6   | 0.35  |       |    |
| GENE737X | 14737_s_at | 14737_s_at | 1     | -1.59 | -1.83 | -2.94 | -2.83 | -2.47 | -2.18 | -     |       |       |       |    |
|          | 2.18       | -1.88      | -0.53 | -0.73 | -0.64 | -0.73 | -0.83 | -0.73 | -0.81 | -0.2  | -0.02 | -0.71 | -0.97 | -  |
|          | 1.32       | -1.08      | -0.83 | -1.28 | -1.15 | -0.59 | -1    | -0.34 | -0.25 | -0.15 | -0.32 | -0.15 |       |    |
| GENE736X | 16954_at   | 16954_at   | 1     | -1.64 | -2.32 | -3.64 | -3.18 | -3.18 | -2.64 | -     |       |       |       |    |
|          | 2.83       | -2.39      | -1.02 | -0.91 | -0.53 | -0.88 | -0.81 | -0.94 | -0.94 | 0.17  | -0.16 | -0.62 | -0.97 | -1 |
|          |            | -1.05      | -1.47 | -1.55 | -1.32 | -0.62 | -1.21 | -0.64 | -0.35 | -0.3  | -0.37 | -0.13 |       |    |
| GENE735X | 18313_at   | 18313_at   | 1     | -1.94 | -2.83 | -4.32 | -4.32 | -3.64 | -3.18 | -     |       |       |       |    |
|          | 3.32       | -3.05      | -0.94 | -1.12 | -1.02 | -1.02 | -1.05 | -1.18 | -1.43 | -0.25 | -0.68 | -1.39 | -1.25 | -  |
|          | 1.25       | -1.28      | -1.73 | -1.83 | -1.59 | -0.94 | -1.73 | -0.97 | -0.53 | -0.45 | -0.64 | -0.13 |       |    |
| GENE743X | 18972_at   | 18972_at   | 1     | -2.05 | -2    | -3.47 | -3.05 | -2.83 | -2.25 | -     |       |       |       |    |
|          | 2.73       | -2.18      | -0.62 | -0.97 | -0.88 | -0.71 | -0.73 | -1.12 | -1.02 | -0.35 | -0.45 | -0.71 | -0.97 | -  |
|          | 0.76       | -0.91      | -1.15 | -1.39 | -1.12 | -0.41 | -1.15 | -0.47 | -0.2  | -0.25 | -0.16 | -0.45 |       |    |



|          |            |            |       |       |       |       |       |       |       |       |       |       |   |
|----------|------------|------------|-------|-------|-------|-------|-------|-------|-------|-------|-------|-------|---|
| GENE742X | 15209_s_at | 15209_s_at | 1     | -2.18 | -2.18 | -3.64 | -3.32 | -3.18 | -2.64 | -     |       |       |   |
| 2.94     | -2.73      | -0.55      | -1    | -0.73 | -0.64 | -0.62 | -1.18 | -1.12 | -0.02 | -0.21 | -0.88 | -1.35 | - |
| 1.02     | -1.35      | -1.39      | -1.43 | -1.25 | -0.59 | -1.12 | -0.71 | -0.26 | -0.23 | -0.23 | 0     |       |   |
| GENE738X | 16136_at   | 16136_at   | 1     | -1.69 | -1.94 | -2.83 | -2.94 | -2.39 | -2    | -     |       |       |   |
| 2.73     | -2.47      | -0.51      | -0.94 | -0.57 | -0.78 | -0.73 | -1.28 | -1.08 | -0.1  | -0.3  | -0.53 | -1    | - |
| 0.97     | -1.18      | -1.12      | -1.25 | -0.88 | -0.51 | -0.86 | -0.64 | -0.39 | -0.45 | -0.08 | -0.39 |       |   |
| GENE207X | 18722_s_at | 18722_s_at | 1     | -1.02 | -0.88 | -1.73 | -1.51 | -1.39 | -1.18 | -     |       |       |   |
| 1.32     | -1.32      | -0.45      | -0.45 | -0.34 | -0.3  | -0.43 | -0.71 | -0.55 | -0.07 | -0.32 | -0.49 | -0.64 | - |
| 0.53     | -0.71      | -0.73      | -0.94 | -0.78 | -0.45 | -0.62 | -0.35 | -0.32 | -0.2  | -0.1  | 0.05  |       |   |
| GENE155X | 15373_g_at | 15373_g_at | 1     | -1.69 | -2.18 | -2.94 | -3.05 | -2.64 | -2.25 | -     |       |       |   |
| 2.47     | -1.83      | -0.55      | -0.62 | -0.57 | -0.66 | -0.64 | -1.05 | -0.81 | -0.35 | -0.47 | -0.76 | -1.59 | - |
| 1.12     | -1         | -1.39      | -1.59 | -1.25 | -0.68 | -0.68 | -0.35 | -0.05 | -0.05 | -0.23 | -0.57 |       |   |
| GENE154X | 15372_at   | 15372_at   | 1     | -2.12 | -2.39 | -3.18 | -3.47 | -2.64 | -2.47 | -     |       |       |   |
| 2.39     | -2.05      | -0.62      | -0.78 | -0.73 | -0.76 | -0.76 | -1.28 | -0.86 | -0.64 | -0.59 | -0.83 | -1.47 | - |
| 0.97     | -1.21      | -1.28      | -1.73 | -1.28 | -0.53 | -0.37 | -0.3  | -0.12 | -0.25 | -0.13 | -0.35 |       |   |
| GENE131X | 15163_s_at | 15163_s_at | 1     | -0.59 | -0.76 | -0.88 | -1.12 | -1.15 | -0.88 | -     |       |       |   |
| 0.81     | -0.73      | -0.45      | -0.34 | -0.37 | -0.43 | -0.41 | -0.28 | -0.55 | -0.12 | -0.08 | -0.34 | -0.47 | - |
| 0.18     | -0.35      | -0.51      | -0.53 | -0.43 | -0.16 | -0.45 | -0.05 | 0     | -0.05 | -0.12 | -0.04 |       |   |
| GENE128X | 18644_at   | 18644_at   | 1     | -2.05 | -2    | -3.05 | -2.64 | -2.39 | -2.55 | -     |       |       |   |
| 2.12     | -2.39      | -0.94      | -1.05 | -0.57 | -0.97 | -1    | -1.08 | -1.51 | -0.51 | -0.49 | -0.88 | -1    | - |
| 0.64     | -0.97      | -1.18      | -1.15 | -1.08 | -0.39 | -0.35 | -0.05 | -0.1  | 0.13  | -0.28 | -0.08 |       |   |
| GENE127X | 13151_g_at | 13151_g_at | 1     | -1.78 | -1.64 | -2.73 | -2.73 | -2.47 | -2.25 | -     |       |       |   |
| 2.12     | -2.18      | -1.08      | -0.78 | -1    | -0.49 | -0.66 | -1    | -1.28 | -0.45 | -0.66 | -1.02 | -0.66 | - |
| 0.53     | -0.97      | -1.15      | -0.86 | -0.88 | -0.37 | -0.53 | -0.01 | 0     | -0.15 | -0.02 | 0.04  |       |   |
| GENE122X | 15070_at   | 15070_at   | 1     | -0.83 | -1    | -2    | -1.78 | -1.88 | -1.28 | -     |       |       |   |
| 1.39     | -1.32      | -0.62      | -0.59 | -0.59 | -0.47 | -0.45 | -0.73 | -0.53 | -0.25 | -0.32 | -0.53 | -0.94 | - |
| 0.83     | -0.39      | -1.21      | -1.05 | -0.86 | -0.57 | -0.76 | -0.43 | 0.07  | -0.21 | -0.45 | -0.12 |       |   |
| GENE121X | 19231_at   | 19231_at   | 1     | -2.05 | -1.28 | -2.73 | -2.32 | -2.55 | -2.55 | -     |       |       |   |
| 2.18     | -2.18      | -1.12      | -1.18 | -0.49 | -0.66 | -0.71 | -1.25 | -1.28 | -0.2  | -0.13 | -0.51 | -0.88 | - |
| 0.97     | -1.21      | -1.32      | -1.43 | -1.18 | -0.41 | -1.21 | -0.25 | -0.08 | -0.21 | -0.71 | -0.51 |       |   |
| GENE120X | 20704_at   | 20704_at   | 1     | -1.73 | -1.43 | -3.05 | -2.47 | -2.83 | -2.47 | -     |       |       |   |
| 2.47     | -2.39      | -1.25      | -0.81 | -0.68 | -0.35 | -0.41 | -1.55 | -1.25 | -0.21 | -0.07 | -0.91 | -1.15 | - |
| 0.73     | -0.88      | -1.83      | -1.43 | -0.86 | -0.39 | -0.88 | -0.68 | -0.12 | -0.32 | -0.28 | -0.1  |       |   |
| GENE119X | 13953_at   | 13953_at   | 1     | -1.51 | -1.78 | -2    | -2.25 | -2.64 | -2.32 | -     |       |       |   |
| 1.94     | -1.88      | -1.08      | -0.73 | -0.45 | -0.88 | -0.88 | -0.88 | -1.05 | -0.23 | -0.41 | -0.57 | -0.86 | - |
| 0.45     | -0.97      | -1.35      | -1.64 | -1.32 | -0.71 | -1.12 | -0.83 | -0.23 | -0.08 | -0.28 | 0.17  |       |   |
| GENE118X | 14930_at   | 14930_at   | 1     | -2.05 | -2.18 | -2.94 | -2.94 | -3.18 | -2.94 | -     |       |       |   |
| 3.32     | -2.83      | -0.88      | -1.12 | -0.57 | -1.15 | -1.05 | -1.55 | -1.32 | -0.1  | -0.49 | -0.68 | -0.76 | - |
| 0.91     | -1.39      | -1.32      | -2.12 | -1.94 | -1.15 | -1.39 | -0.91 | -0.47 | -0.16 | -0.47 | -0.1  |       |   |
| GENE117X | 18306_at   | 18306_at   | 1     | -2.18 | -2.32 | -3.05 | -2.83 | -3.32 | -2.64 | -     |       |       |   |
| 2.73     | -2.83      | -0.78      | -0.88 | -0.45 | -0.86 | -0.88 | -1.32 | -1    | -0.26 | -0.78 | -0.66 | -0.62 | - |
| 0.83     | -1         | -1.35      | -1.64 | -1.47 | -0.83 | -1.21 | -0.49 | -0.43 | -0.18 | 0.04  | 0.05  |       |   |
| GENE116X | 18656_at   | 18656_at   | 1     | -2.47 | -2.83 | -3.83 | -4.05 | -4.32 | -3.18 | -     |       |       |   |
| 3.32     | -3.18      | -1.32      | -1.08 | -0.41 | -1.47 | -1.18 | -2.18 | -1    | -0.15 | -0.88 | -0.88 | -1.18 | - |
| 0.73     | -1.47      | -1.94      | -2.25 | -2.47 | -1.28 | -2.05 | -0.57 | -0.51 | -0.28 | -0.3  | -0.15 |       |   |
| GENE143X | 15441_at   | 15441_at   | 1     | -1.55 | -1.15 | -1.88 | -2.25 | -1.55 | -1.39 | -     |       |       |   |
| 0.78     | -1.25      | -0.59      | -0.62 | -0.68 | -0.32 | -0.41 | -0.47 | -0.71 | -0.39 | -0.25 | -0.86 | -0.88 | - |
| 0.43     | -0.59      | -0.64      | -0.71 | -0.66 | -0.45 | -0.71 | -0.21 | -0.18 | -0.12 | -0.26 | -0.15 |       |   |
| GENE142X | 13044_at   | 13044_at   | 1     | -2.05 | -1.39 | -2.64 | -2.73 | -2    | -2    | -     |       |       |   |
| 1.55     | -2         | -0.45      | -0.81 | -0.68 | -0.08 | -0.39 | -1.35 | -0.81 | -0.23 | -0.2  | -0.78 | -1.15 | - |
| 0.64     | -1         | -0.83      | -1.51 | -1.28 | -0.59 | -0.81 | -0.16 | -0.1  | -0.08 | -0.47 | -0.25 |       |   |
| GENE141X | 16120_at   | 16120_at   | 1     | -2.94 | -2.64 | -3.83 | -3.83 | -2.83 | -2.83 | -     |       |       |   |
| 2.94     | -3.18      | -0.59      | -1.64 | -1.35 | -1    | -0.97 | -1.83 | -1.78 | -0.55 | -0.35 | -1.25 | -2.12 | - |
| 0.78     | -1.32      | -1.18      | -1.78 | -1.64 | -0.97 | -1.28 | -0.35 | -0.26 | -0.05 | -0.53 | -0.32 |       |   |
| GENE140X | 13011_at   | 13011_at   | 1     | -2.64 | -1.18 | -2.64 | -3.18 | -2.94 | -3.05 | -     |       |       |   |
| 1.47     | -1.69      | -0.41      | -0.88 | -0.73 | -0.91 | -1.28 | -1.15 | -1.15 | -0.41 | -0.35 | -1.18 | -1.55 | - |
| 1.32     | -1.64      | -1.43      | -1.83 | -1.32 | -0.59 | -0.88 | -0.08 | -0.32 | 0.01  | -0.39 | 0.02  |       |   |

|          |            |            |       |       |       |       |       |       |       |       |       |       |   |
|----------|------------|------------|-------|-------|-------|-------|-------|-------|-------|-------|-------|-------|---|
| GENE139X | 19924_at   | 19924_at   | 1     | -3.05 | -1.25 | -3.47 | -2.64 | -3.18 | -2.94 | -     |       |       |   |
| 1.69     | -2.73      | -0.91      | -1.21 | -0.62 | -0.57 | -0.78 | -1    | -1.35 | -0.57 | -0.73 | -1.15 | -1.73 | - |
| 0.94     | -1.32      | -1.73      | -1.05 | -1.05 | -0.59 | -1.02 | 0.12  | -0.13 | 0.12  | -0.41 | 0     |       |   |
| GENE134X | 15024_at   | 15024_at   | 1     | -1.69 | -1.18 | -1.94 | -1.69 | -2.18 | -1.94 | -     |       |       |   |
| 1.78     | -1.43      | -0.81      | -0.47 | -0.51 | -0.34 | -0.76 | -0.76 | -0.62 | -0.02 | -0.64 | -0.71 | -0.86 | - |
| 0.49     | -0.3       | -1.28      | -0.73 | -1.21 | -0.62 | -0.73 | -0.18 | -0.05 | 0.09  | -0.13 | 0.08  |       |   |
| GENE133X | 18690_at   | 18690_at   | 1     | -1.43 | -1.28 | -2.83 | -2.55 | -2.39 | -1.94 | -     |       |       |   |
| 2.05     | -1.55      | -1.02      | -0.64 | -0.55 | -0.3  | -0.51 | -0.68 | -0.78 | 0.08  | -0.04 | -0.64 | -0.86 | - |
| 0.41     | -0.57      | -1.18      | -0.97 | -1    | -0.59 | -0.64 | 0.04  | 0     | 0.01  | -0.16 | 0.09  |       |   |
| GENE132X | 14986_at   | 14986_at   | 1     | -1.78 | -1.32 | -2.73 | -2.94 | -2.64 | -2.32 | -     |       |       |   |
| 2.55     | -2.05      | -0.64      | -0.57 | -0.39 | -0.47 | -0.47 | -1.12 | -0.81 | -0.08 | -0.1  | -0.55 | -0.94 | - |
| 0.83     | -0.94      | -1.55      | -1.32 | -1.21 | -0.64 | -0.91 | -0.35 | -0.2  | 0.13  | -0.15 | 0.05  |       |   |
| GENE135X | 15906_at   | 15906_at   | 1     | -2.55 | -1.78 | -2.83 | -2.94 | -2.32 | -2.12 | -2    |       |       |   |
| -2       | -0.88      | -0.43      | -0.45 | -0.1  | -0.86 | -1    | -0.55 | -0.04 | -0.71 | -0.68 | -1.02 | -     |   |
| 0.51     | -0.83      | -0.94      | -1.39 | -1.35 | -0.49 | -0.78 | -0.18 | -0.13 | -0.64 | -0.49 | -0.25 |       |   |
| GENE138X | 16452_g_at | 16452_g_at | 1     | -1.43 | -0.86 | -1.35 | -1.32 | -1.35 | -1.25 | -1    |       |       |   |
| -1.28    | -0.43      | -0.26      | -0.34 | -0.16 | -0.32 | -0.53 | -0.59 | -0.05 | -0.16 | -0.41 | -0.43 | -     |   |
| 0.25     | -0.53      | -0.55      | -0.73 | -0.68 | -0.41 | -0.45 | 0.07  | -0.04 | 0     | 0     | 0.02  |       |   |
| GENE137X | 16479_s_at | 16479_s_at | 1     | -2.25 | -1.59 | -2.73 | -2.64 | -2.73 | -2.47 | -     |       |       |   |
| 2.25     | -2.73      | -0.94      | -0.49 | -0.59 | -0.49 | -0.64 | -0.94 | -0.68 | -0.21 | -0.1  | -0.68 | -0.86 | - |
| 0.53     | -1         | -1.28      | -1.25 | -1.18 | -0.64 | -0.86 | -0.28 | -0.28 | -0.12 | -0.23 | -0.1  |       |   |
| GENE136X | 15832_at   | 15832_at   | 1     | -3.64 | -2.47 | -3.64 | -3.47 | -3.83 | -3.32 | -     |       |       |   |
| 2.55     | -2.83      | -1.18      | -0.76 | -0.78 | -0.62 | -0.59 | -1.51 | -1.12 | -0.57 | -0.66 | -1.35 | -1.25 | - |
| 0.62     | -1.35      | -2.12      | -1.64 | -1.21 | -0.91 | -1.08 | -0.45 | -0.45 | -0.32 | -0.02 | 0.02  |       |   |
| GENE126X | 12078_at   | 12078_at   | 1     | -2.25 | -2    | -2.73 | -2.83 | -2.73 | -2.47 | -     |       |       |   |
| 2.32     | -2.12      | -0.78      | -0.66 | -0.71 | -0.88 | -0.81 | -0.88 | -0.78 | -0.55 | -0.35 | -0.86 | -0.66 | - |
| 0.49     | -1.15      | -0.91      | -1.39 | -1.12 | -0.51 | -0.45 | -0.26 | -0.39 | -0.26 | -0.01 | -0.02 |       |   |
| GENE85X  | 16548_at   | 16548_at   | 1     | -3.18 | -2.47 | -3.32 | -3.05 | -2.94 | -2.39 | -     |       |       |   |
| 2.55     | -2.94      | -0.53      | -0.73 | -0.41 | -0.91 | -0.88 | -1.05 | -1.05 | -0.25 | -0.45 | -0.71 | -1    | - |
| 0.94     | -1.21      | -1.28      | -1.35 | -1.18 | -0.59 | -0.86 | -0.32 | -0.32 | -0.07 | -0.1  | -0.1  |       |   |
| GENE173X | 18047_at   | 18047_at   | 1     | -0.97 | -0.97 | -0.88 | -1.32 | -1.32 | -1.15 | -     |       |       |   |
| 1.05     | -1         | -0.35      | -0.3  | -0.3  | -0.28 | -0.43 | -0.57 | -0.55 | -0.04 | -0.21 | -0.53 | -0.21 | - |
| 0.51     | -0.41      | -0.62      | -0.62 | -0.68 | -0.26 | -0.45 | 0.25  | -0.01 | -0.07 | 0.22  | 0.25  |       |   |
| GENE172X | 14914_at   | 14914_at   | 1     | -1.21 | -1.28 | -1.78 | -1.83 | -1.73 | -1.47 | -     |       |       |   |
| 1.64     | -1.35      | -0.43      | 0.04  | -0.21 | -0.71 | -0.86 | -0.88 | -0.57 | -0.21 | -0.45 | -1.15 | -0.62 | - |
| 0.15     | -0.2       | -1.08      | -1    | -0.94 | -0.39 | -0.3  | 0.13  | 0.12  | 0.08  | 0.45  | 0.27  |       |   |
| GENE171X | 13829_at   | 13829_at   | 1     | -0.88 | -0.62 | -1.51 | -1.59 | -1.32 | -1.21 | -     |       |       |   |
| 1.35     | -1.39      | -0.37      | -0.53 | -0.45 | -0.18 | -0.18 | -0.73 | -0.83 | 0.05  | 0.08  | -0.66 | -0.68 | - |
| 0.21     | -0.41      | -0.57      | -0.76 | -0.51 | -0.32 | -0.1  | 0.2   | 0.02  | 0.05  | 0.12  | 0.08  |       |   |
| GENE170X | 16416_at   | 16416_at   | 1     | -1.08 | -1.02 | -1.35 | -1.64 | -1.55 | -1.59 | -     |       |       |   |
| 1.35     | -1.28      | -0.59      | -0.37 | -0.57 | -0.35 | -0.43 | -0.78 | -1    | 0.04  | 0.17  | -0.71 | -0.45 | - |
| 0.18     | -0.59      | -0.73      | -0.62 | -0.68 | -0.25 | -0.35 | 0.2   | 0.08  | 0.08  | -0.01 | 0.07  |       |   |
| GENE169X | 12253_g_at | 12253_g_at | 1     | -1.32 | -0.62 | -1.64 | -1.94 | -1.59 | -1.73 | -     |       |       |   |
| 1.39     | -1.32      | -0.64      | -0.43 | -0.73 | -0.49 | -0.43 | -0.94 | -1.02 | -0.28 | -0.28 | -0.97 | -0.53 | - |
| 0.15     | -0.81      | -0.71      | -1.08 | -0.91 | -0.47 | -0.28 | 0.38  | 0     | 0.04  | 0.16  | 0.02  |       |   |
| GENE191X | 19422_at   | 19422_at   | 1     | -1.55 | -0.91 | -2.39 | -1.59 | -1.59 | -1.39 | -     |       |       |   |
| 1.64     | -1.83      | -0.59      | -0.39 | -0.43 | -0.12 | -0.43 | -0.45 | -0.68 | -0.23 | -0.39 | -0.49 | -0.53 | 0 |
| -0.78    | -0.41      | -0.78      | -0.81 | -0.28 | -0.23 | 0     | -0.13 | -0.01 | -0.16 | 0.09  |       |       |   |
| GENE189X | 13608_at   | 13608_at   | 1     | -1.83 | -1.32 | -3.05 | -2.32 | -1.94 | -2.25 | -     |       |       |   |
| 2.32     | -2.25      | -0.37      | -1.25 | -0.23 | -0.71 | -0.59 | -0.88 | -0.86 | -0.15 | 0     | -0.49 | -0.39 | - |
| 0.47     | -0.28      | -0.45      | -1    | -1    | -0.18 | -0.21 | 0.08  | 0.34  | 0.26  | 0.17  | -0.21 |       |   |
| GENE203X | 18611_at   | 18611_at   | 1     | -1.94 | -1.39 | -2.25 | -2.32 | -2.12 | -1.94 | -     |       |       |   |
| 2.12     | -2.18      | -0.49      | -0.28 | -0.41 | -0.1  | -0.28 | -0.49 | -0.64 | -0.01 | 0.01  | -0.57 | -0.78 | - |
| 0.32     | -0.83      | -0.88      | -1.64 | -1.73 | -1    | -0.76 | -0.08 | -0.05 | -0.08 | -0.32 | -0.1  |       |   |
| GENE202X | 14416_at   | 14416_at   | 1     | -2.18 | -2.12 | -3.05 | -3.05 | -2.83 | -2.25 | -     |       |       |   |
| 2.73     | -2.64      | -0.35      | -0.1  | -0.53 | -0.37 | -0.39 | -1.15 | -1.08 | -0.21 | -0.12 | -0.78 | -0.81 | - |
| 0.49     | -1.05      | -0.83      | -1.73 | -1.83 | -0.97 | -0.81 | -0.53 | -0.18 | -0.3  | -0.13 | 0.05  |       |   |

|          |            |            |       |       |       |       |       |       |       |       |       |       |       |   |
|----------|------------|------------|-------|-------|-------|-------|-------|-------|-------|-------|-------|-------|-------|---|
| GENE201X | 14369_at   | 14369_at   | 1     | -1.83 | -1.47 | -2.73 | -2.83 | -2.05 | -2.25 | -     |       |       |       |   |
|          | 2.94       | -2.64      | -0.41 | -0.49 | -0.39 | -0.55 | -0.57 | -1.08 | -0.78 | -0.05 | -0.1  | -0.66 | -0.59 | - |
|          | 0.51       | -0.78      | -0.83 | -1.94 | -1.88 | -1.05 | -0.81 | 0.02  | -0.08 | 0.05  | -0.05 | 0.05  |       |   |
| GENE200X | 16286_at   | 16286_at   | 1     | -2.55 | -2.18 | -3.32 | -3.32 | -2.94 | -2.32 | -     |       |       |       |   |
|          | 3.32       | -3.32      | -0.21 | -0.62 | -0.49 | -0.78 | -0.73 | -1.18 | -1.15 | -0.28 | -0.21 | -0.86 | -1    | - |
|          | 0.64       | -1.21      | -1.08 | -2.32 | -2    | -1.51 | -0.73 | -0.05 | -0.2  | -0.2  | 0.09  | 0.02  |       |   |
| GENE271X | 12155_at   | 12155_at   | 1     | -3.83 | -3.32 | -3.83 | -4.32 | -3.64 | -4.05 | -     |       |       |       |   |
|          | 3.83       | -3.18      | -0.05 | -0.55 | -0.23 | -1.18 | -0.86 | -1    | -1    | -0.02 | -0.25 | -0.47 | -0.83 | - |
|          | 1.18       | -1.64      | -1.25 | -2.73 | -2.47 | -1.43 | -0.76 | -0.49 | -0.39 | -0.23 | -0.1  | 0.11  |       |   |
| GENE84X  | 19086_at   | 19086_at   | 1     | -3.64 | -2.32 | -3.47 | -4.05 | -3.18 | -3.18 | -     |       |       |       |   |
|          | 3.64       | -3.18      | -0.49 | -1    | -0.78 | -1.18 | -0.88 | -1.51 | -1.08 | -0.35 | -0.28 | -0.73 | -1.39 | - |
|          | 0.81       | -1.39      | -1.12 | -2.12 | -2.12 | -0.97 | -0.76 | 0     | -0.15 | -0.04 | -0.23 | -0.23 |       |   |
| GENE188X | 18296_at   | 18296_at   | 1     | -2.83 | -1.64 | -3.32 | -3.32 | -2.39 | -1.94 | -     |       |       |       |   |
|          | 3.05       | -3.05      | -0.18 | -1.05 | -0.23 | -0.66 | -0.39 | -1.64 | -1.32 | 0     | -0.08 | -0.49 | -0.81 | - |
|          | 0.64       | -1.43      | -0.25 | -1.47 | -0.97 | -0.64 | -0.41 | -0.47 | -0.18 | -0.08 | -0.51 | -0.32 |       |   |
| GENE187X | 16547_s_at | 16547_s_at | 1     | -5.05 | -3.64 | -5.64 | -4.32 | -3.32 | -3.83 | -     |       |       |       |   |
|          | 5.05       | -5.64      | -0.39 | -2.47 | -1.43 | -2.18 | -1.21 | -2.32 | -2.39 | -0.66 | -0.05 | -1.47 | -1.55 | - |
|          | 1.51       | -2         | -1.69 | -2.73 | -2.47 | -1.15 | -0.3  | -0.81 | 0.25  | -0.12 | 0.04  | 0.02  |       |   |
| GENE158X | 16978_g_at | 16978_g_at | 1     | -3.05 | -1.55 | -3.47 | -3.32 | -3.18 | -2    | -     |       |       |       |   |
|          | 3.05       | -2.55      | -0.53 | -0.62 | -0.05 | -0.91 | -0.57 | -1.78 | -0.91 | -0.23 | -0.13 | -0.57 | -1.39 | - |
|          | 1.08       | -1.69      | -1.55 | -2    | -1.39 | -0.73 | -0.05 | -0.05 | -0.15 | -0.12 | 0.18  | 0.12  |       |   |
| GENE316X | 18083_r_at | 18083_r_at | 1     | -0.68 | -0.73 | -0.66 | -1.21 | -0.83 | -0.73 | -     |       |       |       |   |
|          | 1.25       | -0.91      | -0.34 | -0.21 | -0.39 | -0.1  | -0.16 | -0.43 | 0.05  | 0.01  | -0.26 | -0.28 | -0.45 | - |
|          | 0.37       | -0.49      | -0.47 | -0.47 | -0.37 | -0.1  | -0.21 | -0.34 | -0.35 | -0.39 | 0.12  | 0.09  |       |   |
| GENE315X | 18051_r_at | 18051_r_at | 1     | -1.28 | -0.94 | -1.69 | -1.88 | -1.59 | -1.25 | -     |       |       |       |   |
|          | 2.32       | -1.78      | -0.55 | -0.81 | -0.64 | -0.13 | -0.16 | -1.21 | -0.01 | 0.07  | -0.91 | -0.07 | -0.76 | - |
|          | 1.28       | -0.97      | -0.64 | -1.25 | -1.32 | -0.64 | -0.41 | -0.64 | -0.86 | -0.62 | -0.04 | -0.28 |       |   |
| GENE314X | 19117_s_at | 19117_s_at | 1     | -0.66 | -1.15 | -0.76 | -1.73 | -1.39 | -1.47 | -     |       |       |       |   |
|          | 1.51       | -1.28      | -0.76 | -0.26 | 0.01  | -0.47 | -0.37 | -0.78 | -0.23 | -0.12 | -0.59 | 0     | -0.39 | - |
|          | 0.02       | -0.88      | -0.71 | -0.68 | -0.66 | -0.26 | -0.59 | -0.53 | -1.02 | -0.41 | -0.37 | -0.05 |       |   |
| GENE313X | 20008_at   | 20008_at   | 1     | -0.43 | -1.15 | -1.15 | -1.55 | -0.81 | -0.64 | -     |       |       |       |   |
|          | 1.02       | -1.08      | -0.08 | 0     | -0.2  | -0.66 | -0.32 | -0.45 | -0.35 | 0.17  | -0.05 | -0.26 | -0.32 | - |
|          | 0.28       | -0.64      | -0.3  | -0.94 | -0.78 | -0.53 | -0.18 | -0.73 | -0.21 | -0.28 | -0.02 | -0.1  |       |   |
| GENE312X | 17411_s_at | 17411_s_at | 1     | -0.68 | -1.55 | -1.25 | -1.55 | -1.39 | -1.12 | -     |       |       |       |   |
|          | 1.12       | -1.18      | -0.49 | -0.12 | -0.05 | -0.41 | -0.66 | -0.53 | -0.41 | 0.17  | -0.37 | -0.35 | -0.51 | - |
|          | 0.55       | -0.49      | -1    | -0.62 | -0.53 | -0.51 | -0.62 | -0.91 | -0.45 | -0.41 | 0.02  | 0.07  |       |   |
| GENE311X | 17520_s_at | 17520_s_at | 1     | -0.91 | -1.73 | -1.21 | -1.83 | -1.51 | -1.47 | -     |       |       |       |   |
|          | 2.18       | -1.83      | -0.55 | 0.33  | -0.57 | -0.15 | -0.32 | -0.76 | 0.4   | 0.02  | 0.27  | -0.47 | -0.53 | - |
|          | 0.47       | -0.71      | -0.83 | -1.28 | -1.18 | -0.94 | -0.39 | -0.2  | -0.28 | -0.32 | 0.12  | 0     |       |   |
| GENE259X | 16860_at   | 16860_at   | 1     | -1.73 | -1.05 | -0.86 | -1.21 | -1.43 | -1.59 | -     |       |       |       |   |
|          | 1.35       | -1.83      | -0.55 | -0.35 | 0.05  | -0.49 | -0.64 | -0.88 | -0.39 | -0.23 | -0.28 | -0.34 | -0.02 | - |
|          | 0.3        | -0.73      | -0.88 | -1.59 | -1.28 | -0.78 | 0.13  | 0.16  | -0.28 | -0.05 | 0.07  | 0.27  |       |   |
| GENE258X | 13903_at   | 13903_at   | 1     | -2.83 | -2.32 | -3.32 | -2.73 | -2.94 | -2.94 | -     |       |       |       |   |
|          | 3.83       | -2.94      | -1.59 | -0.51 | -0.68 | -0.45 | -0.39 | -1.35 | 0.2   | -0.57 | -0.91 | -0.35 | -0.18 | - |
|          | 0.45       | -1.08      | -1.35 | -2.73 | -2.55 | -1.69 | -0.34 | -0.01 | -0.71 | -0.41 | 0.65  | 0.08  |       |   |
| GENE260X | 20385_at   | 20385_at   | 1     | -2.64 | -1.51 | -1.69 | -2.47 | -1.94 | -2.32 | -     |       |       |       |   |
|          | 2.18       | -2.83      | 0.29  | -0.15 | -0.13 | -0.86 | -0.73 | -1.25 | -0.81 | -0.34 | -0.86 | -0.15 | -0.55 | - |
|          |            | 0.04       | -1.35 | -0.64 | -1.25 | -1.21 | -0.68 | -0.94 | -0.49 | -0.88 | -0.62 | 0.2   | -0.3  | - |
| GENE261X | 18546_at   | 18546_at   | 1     | -1.59 | -0.64 | -1.21 | -1.39 | -1.12 | -1.39 | -     |       |       |       |   |
|          | 1.15       | -1.78      | 0.12  | -0.34 | -0.02 | -0.37 | -0.3  | -0.76 | -0.49 | -0.18 | -0.02 | -0.25 | -0.41 | - |
|          | 0.23       | -0.64      | 0.05  | -0.71 | -0.78 | -0.49 | 0.09  | -0.21 | -0.2  | 0.01  | -0.25 | 0.02  |       |   |
| GENE88X  | 17286_at   | 17286_at   | 1     | -2.55 | -2    | -1.64 | -2.32 | -1.43 | -2.05 | -     |       |       |       |   |
|          | 1.39       | -2.55      | -0.13 | -0.59 | -0.39 | -0.49 | -0.62 | -0.83 | -0.86 | -0.23 | -0.25 | -0.66 | -0.83 | - |
|          | 0.78       | -0.76      | -0.45 | -1.18 | -1.15 | -0.45 | -0.07 | -0.08 | -0.02 | -0.41 | -0.34 | -0.26 |       |   |
| GENE409X | 16451_at   | 16451_at   | 1     | -1.39 | -0.91 | -1.02 | -1.32 | -1    | -1.15 | -     |       |       |       |   |
|          | 0.91       | -1.32      | -0.49 | -0.18 | -0.23 | -0.23 | -0.25 | -0.51 | -0.3  | -0.15 | -0.26 | -0.25 | -0.25 | - |
|          | 0.26       | -0.62      | -0.57 | -0.53 | -0.59 | -0.1  | 0.02  | -0.13 | -0.3  | -0.21 | 0.02  | -0.08 |       |   |

|           |            |            |       |       |       |       |       |       |       |       |       |       |       |   |
|-----------|------------|------------|-------|-------|-------|-------|-------|-------|-------|-------|-------|-------|-------|---|
| GENE408X  | 19834_at   | 19834_at   | 1     | -3.83 | -2.83 | -3.05 | -3.64 | -3.83 | -3.64 | -     |       |       |       |   |
|           | 4.64       | -4.32      | -1.43 | -0.45 | -0.43 | -1.02 | -0.57 | -2.32 | -0.62 | -0.51 | -0.18 | -0.97 | -1.18 | - |
|           | 0.66       | -2.12      | -2.18 | -2.18 | -2.18 | -0.73 | -0.59 | -0.21 | -0.78 | -0.88 | 0.91  | 0.6   |       |   |
| GENE103X  | 20066_at   | 20066_at   | 1     | -1.51 | -0.64 | -1.15 | -1.43 | -1.43 | -1.64 | -     |       |       |       |   |
|           | 1.64       | -2.18      | -0.32 | -0.57 | -0.16 | -0.39 | -0.37 | -0.88 | -0.51 | -0.02 | -0.16 | -0.64 | -0.76 | - |
|           | 0.12       | -0.76      | -0.81 | -1.08 | -0.94 | -0.34 | -0.62 | -0.28 | -0.34 | -0.12 | -0.23 | 0.04  |       |   |
| GENE86X   | 18431_at   | 18431_at   | 1     | -3.18 | -2.25 | -2.94 | -3.18 | -2.83 | -3.64 | -     |       |       |       |   |
|           | 2.83       | -3.83      | -0.78 | -0.81 | -0.45 | -0.91 | -0.57 | -1.51 | -1.32 | -0.25 | -0.45 | -0.71 | -1.78 | - |
|           | 1.32       | -1.32      | -1.51 | -1.47 | -1.35 | -0.91 | -0.13 | -0.05 | 0     | 0.08  | -0.02 | 0.05  |       |   |
| GENE4X    | 20067_at   | 20067_at   | 1     | -2.12 | -1.12 | -1.59 | -1.69 | -2.32 | -2.32 | -2    |       |       |       |   |
|           | -2.64      | -0.66      | -0.51 | -0.16 | -0.43 | -0.45 | -1.47 | -1    | -0.32 | -0.41 | -0.57 | -0.64 | -     |   |
|           | 0.39       | -0.81      | -1.32 | -1.25 | -1.15 | -0.71 | -0.02 | 0.35  | -0.18 | -0.07 | 0.16  | -0.08 |       |   |
| GENE177X  | 12098_at   | 12098_at   | 1     | -0.78 | -1.08 | -1.25 | -1.08 | -0.81 | -1.02 | -     |       |       |       |   |
|           | 0.76       | -1.25      | -0.2  | -0.18 | -0.2  | -0.34 | -0.43 | -0.45 | -0.71 | -0.2  | 0.16  | -0.55 | -0.71 | - |
|           | 0.62       | -1         | -0.62 | -1.02 | -0.78 | -0.26 | -0.12 | -0.83 | -0.1  | -0.1  | -0.04 | 0.01  |       |   |
| GENE176X  | 17631_at   | 17631_at   | 1     | -1.88 | -1.39 | -2.05 | -1.69 | -1.43 | -1.69 | -     |       |       |       |   |
|           | 1.59       | -1.32      | -0.21 | -0.86 | -0.59 | -0.78 | -0.73 | -0.59 | -1.12 | -0.25 | 0.07  | -1.28 | -1.43 | - |
|           | 0.26       | -1.12      | -0.55 | -1.21 | -0.73 | -0.45 | 0.28  | -0.66 | -0.32 | -0.68 | 0.2   | 0.35  |       |   |
| GENE175X  | 12176_at   | 12176_at   | 1     | -1.32 | -1.02 | -1.35 | -1.69 | -1.78 | -1.25 | -     |       |       |       |   |
|           | 0.86       | -1.25      | -0.28 | -0.2  | -0.2  | -0.15 | -0.21 | -0.55 | -0.49 | -0.07 | 0.21  | -0.64 | -0.64 | - |
|           | 0.3        | -0.86      | -0.64 | -1.02 | -0.73 | -0.26 | 0.46  | -0.08 | -0.21 | -0.32 | 0.13  | 0.01  |       |   |
| GENE174X  | 14482_at   | 14482_at   | 1     | -1.25 | -0.78 | -2    | -2    | -1.83 | -1.35 | -     |       |       |       |   |
|           | 0.91       | -1.18      | -0.57 | 0.07  | -0.34 | -0.23 | -0.37 | -0.47 | -0.47 | -0.26 | -0.04 | -0.66 | -0.64 | - |
|           | 0.2        | -1.02      | -0.59 | -1.28 | -0.94 | -0.59 | 0.63  | -0.68 | -0.39 | -0.41 | 0.11  | 0.11  |       |   |
| GENE1134X | 19867_at   | 19867_at   | 1     | -1.25 | -0.02 | -0.91 | -0.73 | -0.97 | -1.88 | -     |       |       |       |   |
|           | 0.73       | -1.35      | -0.01 | 0.66  | 0.69  | 1.11  | 0.96  | 0.09  | 0.73  | 0.56  | 0.05  | -0.05 | -1.02 | - |
|           | 0.04       | -0.53      | -1.15 | -0.91 | -0.73 | -0.16 | -0.76 | 0.07  | -0.28 | 0.01  | -0.08 | -0.1  |       |   |
| GENE1133X | 19833_s_at | 19833_s_at | 1     | -0.71 | -0.35 | -0.91 | -0.73 | -1.15 | -1.25 | -     |       |       |       |   |
|           | 0.51       | -1.12      | -0.39 | 0.56  | 0.5   | 0.5   | 0.75  | -0.37 | 0.23  | 0.6   | 0.34  | -0.01 | -0.71 | - |
|           | 0.25       | -0.83      | -1.15 | -1.08 | -1.02 | -0.55 | -0.73 | -0.25 | -0.18 | -0.08 | -0.26 | 0.15  |       |   |
| GENE1132X | 20047_at   | 20047_at   | 1     | -0.91 | -0.37 | -0.41 | -0.64 | -1.43 | -1.47 | -     |       |       |       |   |
|           | 0.88       | -1.39      | 0.17  | 0.95  | 0.73  | 0.08  | 0.4   | -0.37 | 0.94  | 0.5   | 0.4   | 0.16  | -1.02 | - |
|           | 1.08       | -0.88      | -1.55 | -0.39 | -0.49 | -0.34 | -1.21 | -1.02 | -0.23 | -0.1  | -0.41 | 0.2   |       |   |
| GENE1131X | 13118_f_at | 13118_f_at | 1     | -0.47 | 0.17  | -0.81 | -0.62 | -1.64 | -1.59 | -     |       |       |       |   |
|           | 1.39       | -0.94      | -0.25 | 0.77  | 0.74  | 0.78  | 0.67  | -0.07 | 0.68  | 0.74  | 0.43  | 0.21  | -0.94 | - |
|           | 0.78       | -0.49      | -1.39 | -0.73 | -0.97 | -0.51 | -1.15 | -0.2  | -0.04 | 0.42  | -0.55 | 0.29  |       |   |
| GENE484X  | 20016_at   | 20016_at   | 1     | -1.59 | -0.32 | -1.39 | -0.91 | -1.59 | -1.94 | -     |       |       |       |   |
|           | 1.55       | -1.88      | 0.17  | 0.67  | 0.29  | 0.74  | 0.62  | -0.66 | 0.33  | 0.08  | -0.37 | 0.23  | -0.64 | - |
|           | 0.04       | -0.62      | -1.05 | -0.3  | -0.15 | 0.05  | -0.76 | -0.57 | -0.41 | -0.08 | 0.12  | 0.42  |       |   |
| GENE1140X | 19438_at   | 19438_at   | 1     | -0.51 | -0.41 | -0.25 | -0.68 | -1    | -1.08 | -     |       |       |       |   |
|           | 0.35       | -0.41      | -0.39 | 0.12  | 0.18  | -0.08 | -0.13 | -0.08 | -0.02 | -0.02 | -0.21 | -0.02 | -0.21 | - |
|           | 0.05       | -0.62      | -0.55 | -0.55 | -0.59 | -0.25 | -1.25 | -0.45 | -0.34 | -0.16 | -0.3  | -0.04 |       |   |
| GENE487X  | 14009_at   | 14009_at   | 1     | -2.47 | -1.25 | -0.94 | -1.39 | -2.12 | -2.94 | -     |       |       |       |   |
|           | 1.28       | -1.39      | -1.28 | 0.25  | 0.08  | 0.09  | 0.27  | 0     | 0.08  | -0.43 | -0.49 | -0.68 | -0.83 | - |
|           | 1.47       | -1.32      | -1.51 | -0.88 | -1.59 | -0.94 | -1.59 | -0.23 | -0.28 | 0.22  | -0.39 | -0.25 |       |   |
| GENE483X  | 15881_at   | 15881_at   | 1     | -0.37 | -0.18 | -0.76 | -0.55 | -1.59 | -1.59 | -     |       |       |       |   |
|           | 0.88       | -1.12      | -0.73 | 0.09  | -0.08 | -0.04 | -0.08 | -0.57 | 0.04  | 0.28  | 0.22  | -0.45 | -0.62 | - |
|           | 0.15       | -0.43      | -1.21 | -0.53 | -0.51 | -0.35 | -0.83 | -0.18 | -0.34 | -0.18 | -0.05 | 0.08  |       |   |
| GENE482X  | 12075_at   | 12075_at   | 1     | -0.94 | -0.32 | -1.02 | -1.15 | -1.94 | -1.55 | -     |       |       |       |   |
|           | 1.64       | -1.39      | -0.76 | 0.09  | 0.09  | 0.07  | -0.35 | -0.78 | 0.13  | 0.12  | -0.18 | -0.39 | -1.08 | - |
|           | 0.3        | -0.64      | -1.43 | -0.83 | -0.57 | -0.28 | -0.78 | -0.51 | -0.62 | -0.05 | 0.07  | 0.15  |       |   |
| GENE481X  | 12782_r_at | 12782_r_at | 1     | -1.18 | -0.37 | -1.64 | -1.59 | -2.25 | -1.69 | -     |       |       |       |   |
|           | 1.47       | -0.91      | -0.97 | 0.23  | 0.23  | 0.12  | -0.13 | -0.1  | 0.08  | 0.13  | 0.47  | -0.15 | -0.34 | - |
|           | 0.51       | -0.71      | -1.28 | -0.81 | -0.86 | -0.45 | -1.55 | -0.16 | 0     | 0.01  | -0.2  | 0.17  |       |   |
| GENE480X  | 17564_s_at | 17564_s_at | 1     | -1.39 | -0.18 | -1.32 | -0.59 | -2.05 | -1.51 | -     |       |       |       |   |
|           | 0.76       | -1.39      | -0.94 | -0.1  | 0.18  | 0.49  | -0.26 | -0.57 | -0.13 | -0.2  | -0.66 | -0.15 | -0.71 | - |
|           | 0.13       | -0.39      | -1.28 | -0.76 | -1.12 | -0.55 | -1.35 | 0.09  | -0.47 | 0.41  | -0.41 | 0.37  |       |   |

|           |            |            |       |       |       |       |       |       |       |       |       |       |   |
|-----------|------------|------------|-------|-------|-------|-------|-------|-------|-------|-------|-------|-------|---|
| GENE634X  | 20100_at   | 20100_at   | 1     | -0.1  | -0.35 | -0.45 | -0.51 | -0.41 | -0.49 | -     |       |       |   |
| 1.08      | -0.47      | -0.12      | -0.55 | 0.12  | 0.31  | 0.23  | -0.3  | 0.01  | 0.4   | 0.4   | -0.2  | -0.59 | - |
| 0.07      | -0.13      | -0.41      | -0.68 | -0.49 | -0.23 | -0.66 | -0.1  | 0.13  | 0.22  | 0.12  | 0.2   |       |   |
| GENE633X  | 15210_s_at | 15210_s_at | 1     | -0.49 | -0.78 | -1.25 | -1.02 | -1.15 | -0.97 | -     |       |       |   |
| 0.78      | -0.51      | 0.21       | 0.18  | 0.13  | 0.41  | 0.22  | 0.31  | -0.04 | 0.63  | 0.56  | -0.15 | -0.57 | - |
| 0.76      | -0.64      | -0.41      | -0.81 | -0.66 | -0.51 | -0.28 | -0.07 | -0.1  | -0.02 | -0.1  | -0.04 |       |   |
| GENE632X  | 15105_s_at | 15105_s_at | 1     | -0.13 | -0.57 | -1.28 | -1.51 | -1.51 | -1.28 | -     |       |       |   |
| 1.15      | -0.78      | -0.15      | 0.64  | -0.12 | 0.41  | 0.34  | 0.56  | 0.16  | 0.42  | 0.84  | -0.34 | -0.73 | - |
| 0.47      | -0.55      | -0.62      | -0.97 | -1.08 | -0.78 | -0.25 | 0.08  | -0.04 | -0.04 | -0.05 | 0.13  |       |   |
| GENE631X  | 18441_s_at | 18441_s_at | 1     | -0.16 | -0.49 | -1.69 | -1.25 | -1.59 | -1.32 | -     |       |       |   |
| 1.55      | -0.94      | -0.02      | 0.28  | 0.12  | 0.65  | 0.54  | 0.42  | 0.09  | 0.6   | 0.27  | -0.04 | -0.28 | - |
| 0.71      | 0.11       | -0.13      | -1    | -0.68 | -0.37 | -0.23 | 0.11  | 0.07  | 0.02  | -0.59 | -0.18 |       |   |
| GENE630X  | 18024_s_at | 18024_s_at | 1     | -0.02 | -1.47 | -3.18 | -0.94 | -1.64 | -2    | -2    |       |       |   |
| -1.08     | 0.38       | 0.28       | 0.65  | 0.46  | 0.12  | -0.15 | -0.32 | 0.47  | 0.07  | -0.05 | -0.83 | -     |   |
| 0.71      | -0.57      | -1.08      | -0.81 | -1.28 | -1.18 | -0.83 | 0.01  | -0.08 | 0.05  | -0.43 | -0.15 |       |   |
| GENE629X  | 16647_s_at | 16647_s_at | 1     | -0.78 | -0.86 | -1.08 | -1.35 | -1.39 | -0.88 | -     |       |       |   |
| 1.32      | -0.81      | 0.37       | 0.67  | 0.4   | 0.38  | 0.21  | 0.11  | 0.27  | 0.71  | 0.63  | -0.1  | -0.51 | - |
| 0.01      | -0.47      | -0.88      | -0.45 | -0.21 | -0.26 | -0.21 | 0.05  | 0.36  | 0.31  | 0.26  | 0.38  |       |   |
| GENE628X  | 15610_at   | 15610_at   | 1     | -1.15 | -0.91 | -1.69 | -1.64 | -2.18 | -1.25 | -     |       |       |   |
| 1.69      | -0.76      | -0.15      | 0.73  | 0.28  | 1.08  | 0.33  | 0.27  | 0.48  | 0.71  | 0.33  | -0.1  | -0.73 | - |
| 0.07      | 0.09       | -1.05      | -1.25 | -0.83 | -1.12 | -0.91 | 0.22  | 0.33  | 0.43  | -0.57 | -0.08 |       |   |
| GENE627X  | 17215_at   | 17215_at   | 1     | -1.78 | -1.69 | -2.94 | -2.18 | -3.05 | -3.18 | -     |       |       |   |
| 3.18      | -2.39      | 0.26       | 1.2   | 0.91  | 1.27  | 0.88  | 0.43  | 0.64  | 1.16  | 0.58  | 0.27  | -0.91 | - |
| 1.08      | -0.81      | -2.25      | -1.88 | -2.12 | -1.47 | -0.66 | 0.02  | -0.05 | 0.4   | -0.47 | 0.18  |       |   |
| GENE1265X | 16564_s_at | 16564_s_at | 1     | -0.88 | -0.13 | -0.47 | -0.57 | -1.02 | -0.47 | -     |       |       |   |
| 0.64      | -0.66      | -0.41      | -0.43 | -0.05 | -0.08 | -0.32 | -0.57 | -0.81 | 0.25  | -0.41 | 0.01  | -0.02 | - |
| 0.57      | -0.32      | -0.37      | -0.41 | -0.23 | -0.23 | 0.02  | 0.43  | 0.31  | 0.25  | 0.05  | -0.02 |       |   |
| GENE485X  | 15817_at   | 15817_at   | 1     | -3.83 | -2.25 | -1.88 | -1.78 | -3.83 | -3.83 | -     |       |       |   |
| 3.18      | -2.94      | -2.12      | -0.66 | 0.38  | -1    | -0.47 | -1.88 | 0.02  | -1.28 | -2.05 | 0.64  | -0.21 | - |
| 1.12      | 0.07       | -3.83      | -0.81 | -1.51 | -1.94 | -1    | -0.43 | 0.41  | 0.51  | -2    | -1.88 |       |   |
| GENE486X  | 17610_at   | 17610_at   | 1     | -2.94 | -1.15 | -1.28 | -1.18 | -2.73 | -3.47 | -     |       |       |   |
| 2.55      | -1.64      | -1.15      | 0.43  | 0.25  | 0.43  | 0.21  | -0.35 | -0.64 | 0     | 0.09  | -0.08 | -0.26 | - |
| 1.55      | -0.2       | -2.25      | -1.55 | -1.05 | -0.55 | -0.45 | 0.05  | -0.13 | 0.16  | 0.22  | 0.04  |       |   |
| GENE479X  | 15087_at   | 15087_at   | 1     | -1    | -0.08 | -0.97 | -0.64 | -1.47 | -1.83 | -     |       |       |   |
| 1.64      | -1.83      | -0.66      | 0.35  | 0.2   | 0.4   | -0.01 | -0.66 | 0.12  | 0.32  | -0.57 | -0.23 | -0.43 | - |
| 0.47      | -0.21      | -1.28      | -0.76 | -0.78 | -0.41 | -0.53 | 0.07  | -0.05 | 0.05  | -0.26 | 0.04  |       |   |
| GENE477X  | 17095_s_at | 17095_s_at | 1     | -1.83 | -1.43 | -1.02 | -0.49 | -1.83 | -2.47 | -     |       |       |   |
| 1.78      | -2.47      | -0.53      | -0.32 | 0.13  | -0.57 | -0.57 | -0.81 | -0.59 | -0.34 | -0.28 | 0     | -0.41 | - |
| 0.41      | -0.45      | -1.28      | -1.05 | -0.91 | -0.49 | -1.47 | -0.66 | -0.23 | -0.2  | -0.16 | 0.25  |       |   |
| GENE490X  | 18573_at   | 18573_at   | 1     | -1.12 | -0.68 | -1.02 | -0.94 | -1.05 | -1.12 | -     |       |       |   |
| 0.37      | -0.81      | -0.59      | -0.25 | -0.35 | -0.23 | -0.32 | -0.32 | -0.55 | -0.2  | -0.16 | -0.32 | -0.35 | - |
| 0.09      | -0.28      | -0.71      | -0.41 | -0.28 | -0.25 | -0.39 | 0.21  | 0.02  | 0.08  | 0.01  | -0.01 |       |   |
| GENE489X  | 16894_at   | 16894_at   | 1     | -1.05 | -0.55 | -0.88 | -0.78 | -1.18 | -1.21 | -     |       |       |   |
| 0.37      | -0.71      | -0.68      | -0.3  | -0.35 | -0.01 | -0.23 | -0.32 | -0.47 | -0.34 | -0.37 | -0.3  | -0.47 | - |
| 0.13      | -0.28      | -0.88      | -0.64 | -0.73 | -0.55 | -0.2  | 0.27  | 0.05  | 0     | 0.01  | 0.04  |       |   |
| GENE488X  | 15909_at   | 15909_at   | 1     | -1.43 | -0.45 | -0.51 | -0.94 | -1.32 | -1.35 | -     |       |       |   |
| 0.26      | -0.73      | -0.55      | -0.02 | -0.25 | -0.37 | -0.45 | 0.11  | -0.26 | -0.43 | -0.34 | -0.3  | -0.23 | - |
| 0.21      | -0.39      | -0.91      | -0.62 | -0.47 | 0.01  | -0.32 | 0.12  | -0.13 | -0.15 | -0.15 | 0.01  |       |   |
| GENE422X  | 16460_s_at | 16460_s_at | 1     | -1.94 | -1.15 | -1.78 | -1.43 | -1.05 | -2.18 | -     |       |       |   |
| 1.12      | -1.64      | -0.02      | -0.62 | 0.11  | -0.88 | -0.68 | -0.81 | -0.94 | -0.62 | -0.97 | -0.32 | -0.59 | - |
| 1.32      | -0.97      | -0.91      | -0.94 | -0.41 | -0.23 | -0.32 | 0.65  | 0.13  | 0.16  | -0.05 | 0.11  |       |   |
| GENE421X  | 17427_at   | 17427_at   | 1     | -1.64 | -1.02 | -0.73 | -1.18 | -1.15 | -1.43 | -     |       |       |   |
| 1.18      | -1.12      | -0.32      | 0.15  | -0.02 | -0.97 | -0.76 | -0.73 | -0.62 | -0.49 | -0.45 | -0.3  | -0.3  | - |
| 0.25      | -0.53      | -0.55      | -0.83 | -0.83 | -0.49 | 0.02  | 0.12  | 0.23  | 0.15  | 0.17  | -0.15 |       |   |
| GENE420X  | 17642_at   | 17642_at   | 1     | -3.83 | -1.88 | -3.64 | -3.05 | -2.25 | -3.64 | -     |       |       |   |
| 2.94      | -2.47      | -1.25      | -1.25 | -0.76 | -1.94 | -1.64 | -1.94 | -2.55 | -0.62 | -0.81 | -0.94 | -1    | - |
| 1.28      | -0.66      | -1.83      | -1.43 | -2    | -2.18 | -0.1  | 0.74  | 0.42  | 0.47  | 0.15  | 0.05  |       |   |

|          |            |            |       |       |       |       |       |       |       |       |       |       |       |   |
|----------|------------|------------|-------|-------|-------|-------|-------|-------|-------|-------|-------|-------|-------|---|
| GENE416X | 13567_at   | 13567_at   | 1     | -2    | -1.78 | -1.51 | -1.39 | -1.28 | -2.18 | -     |       |       |       |   |
|          | 1.59       | -2.25      | -0.68 | -0.35 | -0.23 | -0.51 | -0.71 | -0.81 | -0.94 | -0.59 | -0.71 | -0.35 | -0.47 | - |
|          | 0.23       | -0.68      | -1.05 | -0.49 | -0.32 | 0     | 0.26  | 0.4   | 0.12  | 0.02  | 0.33  | 0.02  |       |   |
| GENE415X | 18708_at   | 18708_at   | 1     | -2    | -1.55 | -2    | -1.47 | -1.88 | -2.32 | -     |       |       |       |   |
|          | 1.94       | -2.18      | -0.04 | -0.16 | -0.04 | -0.68 | -0.64 | -0.68 | -0.91 | -0.32 | -0.16 | -0.28 | -0.83 | - |
|          | 0.13       | -0.59      | -1.05 | -0.41 | -0.26 | -0.25 | 0.23  | 0.2   | -0.21 | -0.07 | 0.05  | 0.12  |       |   |
| GENE414X | 12143_at   | 12143_at   | 1     | -2.25 | -0.97 | -1.21 | -1.69 | -1.32 | -1.73 | -     |       |       |       |   |
|          | 1.25       | -1.55      | -0.15 | -0.34 | -0.08 | -0.45 | -0.39 | -0.73 | -0.71 | -0.1  | -0.35 | -0.62 | -1.21 | - |
|          | 0.34       | -0.39      | -0.76 | -0.53 | -0.64 | 0.04  | -0.12 | 0.25  | 0     | 0.13  | -0.28 | -0.01 |       |   |
| GENE413X | 20576_at   | 20576_at   | 1     | -2    | -1.88 | -2.47 | -2.32 | -2.18 | -2.39 | -2    |       |       |       |   |
|          | -1.88      | -0.83      | -0.41 | -0.34 | -0.43 | -0.3  | -0.94 | -0.76 | -0.43 | -0.45 | -0.71 | -1.69 | -     |   |
|          | 0.55       | -0.62      | -1.28 | -0.51 | -0.41 | -0.07 | -0.05 | 0.01  | 0.35  | 0.36  | -0.25 | -0.43 |       |   |
| GENE665X | 13698_at   | 13698_at   | 1     | 0.09  | -0.83 | -1.28 | -1.15 | -1.35 | -0.83 | -     |       |       |       |   |
|          | 0.91       | -0.81      | -0.26 | -0.43 | -0.23 | 0.13  | 0.04  | -0.23 | -0.28 | 0.5   | 0.65  | -0.43 | -0.78 | - |
|          | 0.08       | -0.3       | -0.76 | -0.53 | -0.71 | -0.49 | -0.71 | -0.23 | -0.02 | 0.11  | 0.07  | 0.08  |       |   |
| GENE664X | 16117_at   | 16117_at   | 1     | -0.49 | -0.55 | -2    | -1.83 | -1.39 | -1.12 | -     |       |       |       |   |
|          | 1.32       | -1.78      | -0.07 | -0.02 | -0.3  | 0.17  | 0.02  | -0.62 | -0.47 | -0.1  | 0.01  | -0.68 | -0.88 | - |
|          | 0.26       | -0.13      | -0.64 | -1.35 | -1.43 | -1.64 | -0.64 | 0     | 0.15  | 0     | -0.05 | 0.26  |       |   |
| GENE579X | 14907_at   | 14907_at   | 1     | -0.45 | -0.18 | -1.02 | -0.86 | -1.15 | -0.88 | -     |       |       |       |   |
|          | 0.68       | -0.94      | -0.39 | -0.07 | -0.49 | -0.01 | -0.12 | -0.55 | -0.13 | -0.25 | 0.12  | -0.71 | -0.66 | - |
|          | 0.04       | -0.37      | -0.64 | -0.39 | -0.23 | -0.12 | -0.47 | -0.71 | -0.23 | 0.09  | 0.16  | 0.2   |       |   |
| GENE578X | 15599_s_at | 15599_s_at | 1     | -0.47 | -0.53 | -1.18 | -1.18 | -1.02 | -0.71 | -     |       |       |       |   |
|          | 0.68       | -1         | -0.23 | 0.13  | -0.25 | 0.08  | -0.02 | -0.47 | -0.3  | 0.16  | 0.05  | -0.53 | -1    | - |
|          | 0.1        | -0.28      | -0.62 | -0.35 | -0.51 | -0.43 | -0.81 | -0.1  | -0.08 | 0.23  | -0.35 | 0.17  |       |   |
| GENE577X | 17275_i_at | 17275_i_at | 1     | -0.51 | -0.41 | -1    | -1.73 | -1.64 | -1.69 | -     |       |       |       |   |
|          | 1.28       | -1.21      | -0.73 | 0.12  | -0.37 | 0.05  | 0.08  | -0.86 | -0.57 | -0.2  | 0.16  | -1.21 | -1.25 | - |
|          | 0.04       | -0.53      | -1.32 | -1.25 | -0.97 | -0.51 | -1.32 | -0.02 | 0.07  | 0.12  | 0.32  | 0.11  |       |   |
| GENE576X | 15411_at   | 15411_at   | 1     | -1.02 | -0.68 | -0.81 | -1.25 | -1.18 | -1.15 | -     |       |       |       |   |
|          | 0.62       | -0.83      | -0.28 | -0.12 | -0.51 | 0.05  | -0.01 | -0.1  | -0.18 | 0     | 0.17  | -0.81 | -0.43 | - |
|          | 0.12       | -0.45      | -0.62 | -0.68 | -0.59 | -0.34 | -0.32 | -0.18 | -0.08 | -0.32 | 0.13  | 0.05  |       |   |
| GENE575X | 15826_at   | 15826_at   | 1     | -1.25 | -0.78 | -1.35 | -1.59 | -1.47 | -1.78 | -     |       |       |       |   |
|          | 1.21       | -1.28      | -0.39 | -0.21 | -0.78 | 0.12  | -0.43 | -0.3  | -0.32 | -0.62 | -0.34 | -0.81 | -1.12 | - |
|          | 0.13       | -0.53      | -1    | -1.35 | -1.15 | -0.34 | -0.91 | -0.62 | -0.62 | -0.66 | 0.11  | 0.44  |       |   |
| GENE571X | 14651_at   | 14651_at   | 1     | -0.57 | -0.83 | -0.88 | -0.97 | -1.32 | -1.15 | -     |       |       |       |   |
|          | 0.76       | -0.91      | -0.18 | -0.18 | 0.02  | 0.2   | 0.13  | -0.32 | -0.21 | 0.32  | 0.38  | -0.51 | -0.57 | - |
|          | 0.66       | -0.51      | -0.76 | -1.08 | -0.97 | -0.88 | -0.39 | -0.26 | 0     | -0.1  | -0.1  | -0.04 |       |   |
| GENE570X | 15207_s_at | 15207_s_at | 1     | -0.49 | -0.78 | -2.25 | -1.78 | -2.25 | -2.18 | -     |       |       |       |   |
|          | 1.83       | -1.55      | -0.39 | 0     | 0.44  | 0.55  | 0.23  | -0.25 | -0.35 | 0.72  | 0.36  | -0.07 | -1.28 | - |
|          | 0.81       | -0.76      | -1.94 | -1.94 | -2.12 | -1.64 | -1.51 | -0.43 | -0.04 | 0.34  | -0.64 | 0.53  |       |   |
| GENE569X | 19717_at   | 19717_at   | 1     | -0.97 | -0.55 | -2.64 | -1.55 | -1.78 | -2.64 | -     |       |       |       |   |
|          | 1.08       | -1.59      | -0.45 | 0.28  | 0.45  | 0.64  | 0.04  | -0.39 | 0.08  | 0.02  | 0.17  | -0.73 | -1.43 | - |
|          | 1.39       | -0.51      | -1.12 | -1.78 | -1.78 | -1.15 | -1.05 | -0.32 | -0.51 | -0.07 | -0.49 | 0.07  |       |   |
| GENE568X | 15544_at   | 15544_at   | 1     | -1.59 | 0.12  | -1.28 | -1.12 | -2.05 | -2.64 | -     |       |       |       |   |
|          | 1.59       | -2.18      | -0.34 | 0.05  | 0.08  | 0.46  | 0.29  | -0.88 | -0.28 | 1     | 0.12  | -0.32 | -2.18 | - |
|          | 1.12       | -0.86      | -2.83 | -1.73 | -1.51 | -1.55 | -1.25 | -0.18 | -0.23 | 0.18  | -0.35 | -0.07 |       |   |
| GENE496X | 12280_g_at | 12280_g_at | 1     | -0.91 | 0.11  | -0.83 | -0.97 | -1.21 | -0.47 | -     |       |       |       |   |
|          | 0.68       | -0.16      | -0.16 | -0.15 | 0.08  | 0.02  | 0.07  | -0.15 | -0.21 | 0.16  | 0.46  | -0.28 | -0.21 | - |
|          | 0.18       | -0.51      | -0.66 | -0.47 | -0.55 | -0.37 | -0.47 | 0.21  | -0.04 | 0.11  | 0.25  | 0.25  |       |   |
| GENE494X | 16260_at   | 16260_at   | 1     | -0.86 | 0.04  | -0.73 | -0.45 | -1.35 | -1.39 | -     |       |       |       |   |
|          | 1.21       | -1.25      | -0.47 | -0.34 | 0.17  | 0.07  | 0.08  | -0.66 | -0.49 | 0.41  | 0.75  | -0.68 | -0.47 | - |
|          | 0.01       | -0.26      | -0.91 | -0.73 | -0.47 | -0.45 | -0.13 | 0.16  | -0.1  | 0.17  | 0     | 0.46  |       |   |
| GENE493X | 19245_at   | 19245_at   | 1     | -1.78 | 0.41  | -2    | -1.59 | -2.12 | -3.47 | -     |       |       |       |   |
|          | 3.18       | -2.64      | -1.64 | -0.18 | -0.15 | 1     | 0.94  | -1.18 | -0.43 | 0     | 1.3   | -0.3  | -0.59 | - |
|          | 0.29       | -0.91      | -1.83 | -1.32 | -1    | -1    | -1    | 0.17  | 0.04  | 0.04  | 0.29  | 0.77  |       |   |
| GENE988X | 15126_s_at | 15126_s_at | 1     | -0.66 | -0.62 | -0.43 | -0.71 | -1.05 | -1.55 | -     |       |       |       |   |
|          | 0.94       | -1.69      | -0.32 | -0.59 | 0     | -0.08 | -0.37 | -1.32 | -0.86 | 0.59  | 0.48  | -0.49 | -0.86 | - |
|          | 0.53       | -0.39      | -1.28 | -0.51 | -0.57 | -0.34 | -0.2  | 0     | -0.21 | -0.15 | -0.12 | 0.04  |       |   |

|          |            |            |       |       |       |       |       |       |       |       |       |       |   |
|----------|------------|------------|-------|-------|-------|-------|-------|-------|-------|-------|-------|-------|---|
| GENE573X | 19379_at   | 19379_at   | 1     | -0.57 | -0.55 | -0.73 | -0.59 | -1.02 | -1.08 | -     |       |       |   |
| 0.62     | -1.08      | -0.37      | -0.13 | -0.1  | 0.2   | 0.07  | -0.55 | -0.39 | 0.08  | 0.25  | -0.1  | -0.43 | - |
| 0.13     | -0.07      | -1.05      | -0.21 | -0.45 | 0.11  | -0.43 | -0.02 | 0.02  | 0.01  | -0.2  | 0.28  |       |   |
| GENE574X | 17115_s_at | 17115_s_at | 1     | -0.49 | -0.47 | -0.64 | -0.73 | -1.43 | -1.28 | -     |       |       |   |
| 0.86     | -0.94      | -0.05      | -0.32 | -0.34 | -0.25 | -0.21 | -0.37 | -0.25 | -0.18 | 0.37  | -0.37 | -0.83 | - |
| 0.32     | -0.68      | -0.53      | -0.16 | -0.2  | 0.23  | -0.3  | -0.26 | -0.05 | 0.09  | -0.15 | 0.05  |       |   |
| GENE423X | 12749_at   | 12749_at   | 1     | -0.47 | -0.51 | -0.68 | -0.83 | -0.97 | -1.39 | -     |       |       |   |
| 0.88     | -1.08      | -0.45      | -0.16 | -0.51 | -0.64 | -0.71 | -0.62 | -0.76 | -0.05 | 0.02  | -0.53 | -0.73 | - |
| 0.68     | -0.53      | -0.76      | -0.37 | -0.26 | -0.2  | -0.21 | 0.21  | -0.08 | -0.07 | 0.02  | 0.04  |       |   |
| GENE636X | 13262_s_at | 13262_s_at | 1     | -0.73 | -1.21 | -1.55 | -1.28 | -1.35 | -1.21 | -     |       |       |   |
| 1.94     | -1         | -0.37      | -0.3  | 0.22  | 0.13  | -0.02 | 0.07  | -0.3  | 0.56  | 0.47  | -1.25 | -0.59 | - |
| 1.32     | -1.12      | -1.25      | -1.08 | -0.78 | -0.62 | -0.51 | -1.15 | -0.28 | -0.26 | 0.17  | 0.08  |       |   |
| GENE635X | 13286_s_at | 13286_s_at | 1     | -1.08 | -2.25 | -2.25 | -1.43 | -2.25 | -1.43 | -     |       |       |   |
| 2.73     | -2.25      | -0.66      | -1.35 | 0.02  | -0.13 | -0.07 | -0.68 | -0.91 | -0.05 | 0.22  | -1.47 | 0     | - |
| 1.43     | -0.94      | -0.43      | -1.47 | -1.39 | -0.59 | -0.32 | -1.02 | -0.05 | -0.37 | 0.31  | 0.18  |       |   |
| GENE562X | 15595_s_at | 15595_s_at | 1     | -1.32 | -1.08 | -1.83 | -1.73 | -1.83 | -1.43 | -     |       |       |   |
| 1.43     | -1.55      | -0.12      | -0.34 | -0.2  | -0.37 | -0.32 | -0.45 | -0.62 | -0.08 | -0.01 | -0.34 | -0.71 | - |
| 0.39     | -0.73      | -0.49      | -0.88 | -0.83 | -0.45 | -0.47 | -0.32 | -0.34 | -0.25 | -0.55 | -0.39 |       |   |
| GENE561X | 20340_at   | 20340_at   | 1     | -2    | -1.25 | -2.39 | -2.12 | -2.47 | -1.78 | -2    |       |       |   |
| -1.73    | -0.47      | -0.18      | -0.25 | -0.18 | -0.3  | -0.76 | -0.53 | 0.04  | 0.28  | -0.49 | -1.18 | -     |   |
| 0.53     | -1.08      | -0.71      | -0.97 | -0.71 | -0.37 | -0.76 | -0.53 | -0.45 | -0.15 | -0.53 | -0.21 |       |   |
| GENE560X | 12338_at   | 12338_at   | 1     | -1.94 | -2.05 | -2.25 | -2.47 | -2.55 | -3.05 | -     |       |       |   |
| 2.05     | -2.25      | -0.62      | -0.12 | -0.34 | -0.26 | -0.34 | -1.08 | -0.41 | -0.28 | -0.34 | -0.68 | -1.05 | - |
| 1.05     | -1.35      | -1.25      | -1.21 | -1.15 | -0.41 | -0.66 | -0.66 | -0.39 | -0.43 | -0.64 | -0.47 |       |   |
| GENE257X | 18687_at   | 18687_at   | 1     | -1.05 | -0.71 | -1.08 | -1.43 | -1.35 | -1.15 | -     |       |       |   |
| 1.02     | -0.76      | -0.3       | -0.05 | -0.15 | -0.05 | -0.08 | -0.16 | -0.37 | 0.16  | -0.05 | -0.13 | -0.62 | - |
| 0.73     | -0.62      | -0.53      | -0.59 | -0.57 | -0.37 | -0.55 | -0.15 | -0.3  | -0.25 | -0.2  | -0.12 |       |   |
| GENE252X | 15213_s_at | 15213_s_at | 1     | -0.68 | -1    | -1.02 | -1    | -1.02 | -1.05 | -     |       |       |   |
| 0.73     | -0.86      | -0.2       | -0.15 | -0.12 | -0.08 | -0.08 | -0.07 | -0.32 | 0.18  | 0.17  | -0.13 | -0.45 | - |
| 0.68     | -0.64      | -0.37      | -0.71 | -0.49 | -0.21 | -0.3  | -0.18 | 0.04  | -0.05 | -0.08 | -0.16 |       |   |
| GENE251X | 20648_at   | 20648_at   | 1     | -1.25 | -1.35 | -1.64 | -1.28 | -1.47 | -1.18 | -     |       |       |   |
| 1.21     | -1.28      | -0.23      | -0.18 | 0.08  | -0.12 | 0.05  | -0.34 | -0.47 | 0.26  | 0.13  | -0.2  | -0.53 | - |
| 0.51     | -0.86      | -1.08      | -1.08 | -0.94 | -0.45 | -0.53 | -0.41 | -0.16 | -0.18 | -0.04 | 0.02  |       |   |
| GENE250X | 16067_at   | 16067_at   | 1     | -0.91 | -1.21 | -1.64 | -1.35 | -1.55 | -1.05 | -     |       |       |   |
| 1.02     | -0.94      | -0.43      | -0.23 | -0.12 | 0     | -0.2  | -0.39 | -0.57 | 0.02  | 0.27  | -0.35 | -0.32 | - |
| 0.64     | -0.94      | -0.78      | -0.83 | -0.97 | -0.53 | -0.3  | -0.49 | -0.2  | -0.01 | -0.32 | -0.25 |       |   |
| GENE249X | 12798_at   | 12798_at   | 1     | -1.55 | -2.18 | -2.83 | -2.32 | -2.47 | -2.94 | -     |       |       |   |
| 2.18     | -2         | -0.86      | -0.28 | -0.47 | -0.51 | -0.55 | -0.55 | -0.39 | 0.12  | 0.28  | -0.47 | -0.76 | - |
| 0.53     | -1.05      | -1.43      | -1.28 | -1.43 | -0.97 | -0.41 | -0.08 | -0.2  | -0.32 | -0.1  | -0.1  |       |   |
| GENE248X | 13700_at   | 13700_at   | 1     | -2.39 | -2.94 | -4.05 | -3.64 | -3.83 | -3.18 | -     |       |       |   |
| 2.73     | -2.64      | -0.57      | -0.73 | -0.45 | -0.55 | -0.81 | -0.66 | -1.21 | 0.18  | 0.25  | -0.45 | -0.59 | - |
| 1.18     | -1.43      | -1.51      | -2.47 | -2.39 | -1.59 | -0.57 | -0.21 | -0.08 | -0.16 | -0.26 | -0.16 |       |   |
| GENE587X | 13007_at   | 13007_at   | 1     | -0.78 | -0.76 | -1.39 | -1.32 | -1.25 | -0.86 | -1    |       |       |   |
| -0.94    | -0.25      | 0.05       | -0.35 | -0.05 | -0.21 | -0.16 | -0.21 | -0.08 | 0.13  | -0.49 | -0.68 | -     |   |
| 0.16     | -0.45      | -0.62      | -0.81 | -0.62 | -0.25 | -0.39 | -0.35 | -0.23 | -0.13 | -0.16 | 0     |       |   |
| GENE282X | 18685_at   | 18685_at   | 1     | -1.28 | -1.15 | -1.78 | -1.69 | -1.43 | -1.25 | -     |       |       |   |
| 1.43     | -1.25      | -0.23      | -0.39 | -0.26 | -0.08 | -0.25 | -0.35 | -0.37 | 0.04  | -0.23 | -0.37 | -0.76 | - |
| 0.41     | -0.78      | -0.91      | -0.83 | -0.55 | -0.25 | -0.37 | -0.39 | -0.34 | -0.01 | 0.12  | 0.07  |       |   |
| GENE281X | 12611_g_at | 12611_g_at | 1     | -1.47 | -1.39 | -2.83 | -2.73 | -1.94 | -2.12 | -     |       |       |   |
| 2.55     | -2         | -0.47      | -0.45 | -0.37 | -0.04 | -0.13 | -0.39 | -0.45 | 0.32  | 0.2   | -0.78 | -0.83 | - |
| 0.51     | -0.76      | -0.88      | -1.15 | -0.81 | -0.28 | -0.13 | -0.68 | -0.37 | -0.1  | 0.02  | 0.13  |       |   |
| GENE278X | 12752_s_at | 12752_s_at | 1     | -0.64 | -1.32 | -1.88 | -2    | -1.73 | -1.55 | -     |       |       |   |
| 1.47     | -1.28      | -0.12      | -0.1  | -0.16 | -0.35 | -0.25 | -0.47 | -0.57 | -0.02 | 0.22  | -0.43 | -0.57 | - |
| 0.53     | -0.71      | -0.49      | -0.88 | -0.73 | -0.32 | -0.53 | -0.23 | -0.1  | 0.04  | -0.04 | 0.12  |       |   |
| GENE277X | 16110_s_at | 16110_s_at | 1     | -1.73 | -1.69 | -2.73 | -2.83 | -2.05 | -1.94 | -     |       |       |   |
| 1.94     | -2.05      | -0.12      | -0.76 | -0.28 | -0.57 | -0.53 | -0.64 | -0.86 | 0.41  | 0.46  | -0.23 | -1.25 | - |
| 0.86     | -1.47      | -0.81      | -1.78 | -1.59 | -0.76 | -0.66 | -0.45 | -0.08 | 0.02  | -0.2  | -0.02 |       |   |

|          |            |            |       |       |       |       |       |       |       |       |       |       |   |
|----------|------------|------------|-------|-------|-------|-------|-------|-------|-------|-------|-------|-------|---|
| GENE276X | 12604_at   | 12604_at   | 1     | -1.64 | -1.21 | -2.39 | -2.83 | -2.05 | -1.69 | -     |       |       |   |
| 1.59     | -2         | -0.08      | -0.34 | -0.16 | -0.34 | -0.26 | -0.88 | -0.64 | 0.17  | 0.34  | -0.57 | -1.05 | - |
| 0.73     | -0.86      | -1         | -1.32 | -0.73 | -0.35 | -0.41 | -0.26 | -0.02 | -0.05 | -0.21 | -0.05 |       |   |
| GENE275X | 13798_at   | 13798_at   | 1     | -2    | -2.05 | -3.18 | -3.47 | -2.73 | -3.18 | -     |       |       |   |
| 2.18     | -2.64      | -0.66      | -0.83 | -0.34 | -0.91 | -0.59 | -1.25 | -0.88 | 0.29  | 0.36  | -0.91 | -1.88 | - |
| 0.97     | -1.51      | -1.73      | -1.78 | -1.51 | -0.78 | -0.73 | -0.47 | -0.62 | 0.02  | -0.32 | -0.32 |       |   |
| GENE586X | 19933_g_at | 19933_g_at | 1     | -1.08 | -0.68 | -2.47 | -2.12 | -1.35 | -1.12 | -     |       |       |   |
| 1.28     | -1.69      | -0.32      | -0.37 | -0.08 | -0.07 | 0.08  | -0.37 | -0.43 | 0.28  | 0.27  | -0.47 | -1.02 | - |
| 0.25     | -0.76      | -0.53      | -1.05 | -1.25 | -0.68 | -0.64 | -0.49 | -0.26 | -0.01 | -0.51 | -0.07 |       |   |
| GENE585X | 19932_at   | 19932_at   | 1     | -0.86 | -0.88 | -2.25 | -2.18 | -1.51 | -1.18 | -     |       |       |   |
| 1.32     | -1.64      | -0.39      | -0.43 | -0.3  | -0.08 | -0.01 | -0.51 | -0.49 | 0.42  | 0.55  | -0.39 | -1.02 | - |
| 0.45     | -0.97      | -0.53      | -1.32 | -1.32 | -0.88 | -0.71 | -0.47 | -0.26 | -0.12 | -0.59 | -0.32 |       |   |
| GENE584X | 13161_at   | 13161_at   | 1     | -1.88 | -1.64 | -3.18 | -3.32 | -2.73 | -2.25 | -     |       |       |   |
| 2.73     | -2.73      | -0.18      | -0.3  | 0.07  | 0     | -0.12 | -0.94 | -0.88 | 0.56  | 0.42  | -0.39 | -1.55 | - |
| 0.78     | -1.35      | -1.18      | -2    | -1.73 | -0.94 | -1.88 | -1.28 | -0.32 | 0.05  | -0.73 | -0.01 |       |   |
| GENE583X | 14014_at   | 14014_at   | 1     | -1.94 | -1.43 | -3.83 | -3.32 | -2.94 | -2.47 | -     |       |       |   |
| 2.73     | -2.55      | -0.34      | -0.73 | -0.15 | -0.51 | -0.3  | -0.66 | -0.73 | 0.35  | 0.2   | -0.41 | -1.02 | - |
| 0.47     | -1.18      | -0.86      | -1.83 | -1.39 | -0.83 | -1.39 | -1.08 | -0.39 | -0.13 | -0.39 | -0.26 |       |   |
| GENE298X | 14843_at   | 14843_at   | 1     | -0.88 | -1.25 | -2.39 | -2.05 | -1.73 | -1.35 | -     |       |       |   |
| 2.39     | -2         | -0.91      | -0.59 | -0.41 | -0.32 | -0.34 | -0.73 | -0.53 | 0.09  | -0.04 | -0.49 | -1.12 | - |
| 0.66     | -0.73      | -0.62      | -1.39 | -1.05 | -0.86 | -1.12 | -0.43 | -0.08 | -0.05 | -0.76 | -0.1  |       |   |
| GENE297X | 15422_at   | 15422_at   | 1     | -1.83 | -1.88 | -3.64 | -3.47 | -2.73 | -2.94 | -     |       |       |   |
| 3.32     | -3.32      | -0.83      | -1.12 | -0.47 | -0.73 | -0.86 | -1.15 | -1.32 | 0.36  | 0.2   | -0.73 | -1.28 | - |
| 0.94     | -1.15      | -0.83      | -2.05 | -1.88 | -1.15 | -1.02 | -0.51 | -0.04 | 0.01  | -0.91 | -0.39 |       |   |
| GENE296X | 19558_at   | 19558_at   | 1     | -2.18 | -1.83 | -3.32 | -3.64 | -2.94 | -2.94 | -     |       |       |   |
| 3.64     | -3.64      | -0.97      | -0.94 | -0.68 | -0.68 | -0.51 | -1.55 | -1.39 | -0.02 | -0.05 | -1.02 | -1.55 | - |
| 1.25     | -1.51      | -1.35      | -2.55 | -2.05 | -0.94 | -0.88 | -0.57 | -0.34 | 0     | -0.47 | -0.26 |       |   |
| GENE196X | 16693_at   | 16693_at   | 1     | -1.55 | -1    | -3.18 | -2.83 | -1.88 | -1.88 | -     |       |       |   |
| 2.47     | -2.73      | -0.51      | -0.76 | -0.43 | -0.39 | -0.13 | -0.97 | -1.15 | 0.61  | 0.42  | -0.78 | -1.78 | - |
| 1.08     | -1.64      | -0.81      | -2    | -1.35 | -1.12 | -0.76 | -0.49 | -0.15 | 0.12  | -0.51 | 0.07  |       |   |
| GENE195X | 15092_at   | 15092_at   | 1     | -2.47 | -1.51 | -4.05 | -3.18 | -2.47 | -2.64 | -     |       |       |   |
| 3.05     | -2.73      | -0.23      | -1.28 | -0.41 | 0.08  | -0.1  | -1.43 | -1.25 | 0.41  | -0.05 | -0.47 | -1.73 | - |
| 1.59     | -1.43      | -1.02      | -1.94 | -2.05 | -1.55 | -1.59 | -0.83 | -0.2  | -0.15 | -1.12 | -0.37 |       |   |
| GENE199X | 16210_at   | 16210_at   | 1     | -2.12 | -1.32 | -2.83 | -2.47 | -1.59 | -1.32 | -     |       |       |   |
| 1.83     | -2.12      | -0.32      | -0.76 | -0.16 | -0.12 | -0.32 | -0.73 | -0.86 | 0.25  | -0.04 | -0.57 | -1.21 | - |
| 0.51     | -0.83      | -0.66      | -1.88 | -1.43 | -1.08 | -1.25 | -0.47 | -0.05 | 0.13  | -0.16 | 0.18  |       |   |
| GENE198X | 16319_at   | 16319_at   | 1     | -1.69 | -1.35 | -2.39 | -2.18 | -1.78 | -1.69 | -     |       |       |   |
| 1.78     | -1.94      | -0.35      | -0.35 | -0.04 | -0.05 | -0.23 | -0.53 | -0.86 | 0.18  | 0.29  | -0.32 | -0.97 | - |
| 0.23     | -0.62      | -0.76      | -1.51 | -1.35 | -0.51 | -0.62 | -0.34 | -0.15 | 0.02  | -0.28 | 0.16  |       |   |
| GENE197X | 15255_at   | 15255_at   | 1     | -2.83 | -1.94 | -3.83 | -3.32 | -2.47 | -2.05 | -     |       |       |   |
| 3.32     | -3.05      | -0.23      | -0.47 | -0.34 | -0.28 | -0.3  | -0.76 | -0.62 | 0.29  | 0.26  | -0.37 | -1.32 | - |
| 0.97     | -1.18      | -0.91      | -1.64 | -1.69 | -0.71 | -1.05 | -0.62 | -0.2  | -0.04 | -0.1  | -0.1  |       |   |
| GENE148X | 16102_s_at | 16102_s_at | 1     | -1    | -0.78 | -1.21 | -1.25 | -1.12 | -0.88 | -     |       |       |   |
| 0.91     | -0.86      | -0.28      | -0.35 | -0.32 | 0.13  | -0.07 | -0.16 | -0.53 | 0.08  | 0.12  | -0.53 | -0.47 | - |
| 0.51     | -0.32      | -0.47      | -0.59 | -0.55 | -0.23 | -0.51 | -0.08 | 0.04  | 0.07  | -0.13 | 0     |       |   |
| GENE147X | 17048_s_at | 17048_s_at | 1     | -0.91 | -1    | -1.59 | -1.35 | -1.35 | -1.15 | -     |       |       |   |
| 1.25     | -1.08      | -0.25      | -0.21 | -0.28 | -0.02 | -0.26 | -0.15 | -0.53 | 0.09  | 0.18  | -0.43 | -0.66 | - |
| 0.59     | -0.49      | -0.62      | -0.88 | -0.76 | -0.47 | -0.53 | 0.02  | 0.07  | 0.01  | -0.08 | 0     |       |   |
| GENE652X | 12787_at   | 12787_at   | 1     | -1.02 | -1.47 | -2.73 | -3.05 | -3.32 | -2.47 | -     |       |       |   |
| 3.32     | -2.64      | -0.16      | -0.57 | -0.35 | -0.07 | -0.07 | -1.83 | -0.88 | 0.45  | 0.22  | -1.25 | -0.97 | - |
| 0.88     | -1.39      | -1.73      | -1.64 | -1.47 | -1.32 | -0.88 | -0.88 | -0.55 | -0.66 | -0.08 | 0     |       |   |
| GENE580X | 18689_s_at | 18689_s_at | 1     | -1.39 | -1.51 | -2.18 | -2.47 | -2.39 | -1.25 | -     |       |       |   |
| 2.25     | -1.55      | -0.57      | -0.51 | -0.49 | -0.28 | -0.2  | -0.76 | -0.55 | 0.11  | -0.18 | -0.37 | -0.81 | - |
| 0.35     | -0.51      | -0.86      | -1.18 | -0.97 | -1.02 | -1.02 | -0.55 | -0.32 | -0.39 | -0.3  | -0.3  |       |   |
| GENE211X | 19994_at   | 19994_at   | 1     | -1.59 | -1.12 | -1.88 | -1.55 | -1.28 | -1.64 | -     |       |       |   |
| 1.83     | -2.25      | -0.35      | -0.66 | -0.1  | -0.41 | -0.35 | -0.94 | -0.59 | 0.16  | -0.2  | -0.57 | -0.73 | - |
| 0.55     | -0.94      | -0.73      | -1.05 | -0.86 | -0.53 | -0.62 | -0.64 | -0.62 | -0.16 | -0.45 | -0.08 |       |   |



|          |            |            |       |       |       |       |       |       |       |       |       |       |       |    |
|----------|------------|------------|-------|-------|-------|-------|-------|-------|-------|-------|-------|-------|-------|----|
| GENE210X | 13593_at   | 13593_at   | 1     | -1.51 | -1.47 | -2.05 | -1.88 | -1.73 | -1.55 | -     |       |       |       |    |
|          | 2.25       | -2.47      | -0.15 | -0.45 | -0.26 | -0.3  | -0.39 | -1.25 | -0.76 | -0.07 | -0.45 | -0.66 | -0.66 | -  |
|          | 0.53       | -0.73      | -0.53 | -1.28 | -1.15 | -0.76 | -0.71 | -0.55 | -0.34 | -0.2  | -0.41 | -0.04 |       |    |
| GENE209X | 14590_at   | 14590_at   | 1     | -1.59 | -1.35 | -1.73 | -1.78 | -1.78 | -1.28 | -     |       |       |       |    |
|          | 1.88       | -2.05      | -0.78 | -0.78 | -0.41 | -0.37 | -0.43 | -1.05 | -0.53 | -0.05 | -0.18 | -0.43 | -0.81 | -  |
|          | 0.57       | -0.83      | -0.88 | -1.08 | -0.97 | -0.57 | -0.59 | -0.47 | -0.32 | -0.18 | -0.3  | -0.25 |       |    |
| GENE208X | 20688_at   | 20688_at   | 1     | -1.21 | -0.86 | -1.69 | -1.35 | -1.28 | -1.02 | -     |       |       |       |    |
|          | 1.47       | -1.32      | -0.49 | -0.39 | -0.1  | -0.32 | -0.16 | -0.68 | -0.59 | 0.05  | -0.23 | -0.37 | -0.53 | -  |
|          | 0.28       | -0.57      | -0.53 | -0.86 | -1.05 | -0.32 | -0.73 | -0.39 | -0.39 | -0.18 | -0.26 | -0.04 |       |    |
| GENE206X | 20273_at   | 20273_at   | 1     | -1.94 | -1.39 | -3.05 | -2.25 | -2.64 | -2.32 | -     |       |       |       |    |
|          | 2.55       | -2.73      | -0.94 | -0.78 | -0.41 | 0.04  | -0.25 | -1.28 | -0.55 | 0.07  | -0.25 | -0.62 | -1.21 | -  |
|          | 0.59       | -0.71      | -1.35 | -1.47 | -1.43 | -0.73 | -1.32 | -0.53 | -0.37 | -0.07 | -0.78 | -0.41 |       |    |
| GENE215X | 19192_at   | 19192_at   | 1     | -0.86 | -1.43 | -2.12 | -1.69 | -1.32 | -0.88 | -     |       |       |       |    |
|          | 1.64       | -1.59      | 0.01  | -0.25 | 0.18  | -0.25 | -0.25 | -0.66 | -0.64 | -0.02 | 0.02  | -0.04 | -0.62 | -  |
|          | 0.59       | -0.78      | -0.37 | -1.21 | -1    | -0.66 | -0.51 | -0.64 | 0.04  | -0.18 | -0.28 | -0.23 |       |    |
| GENE214X | 15459_s_at | 15459_s_at | 1     | -1.78 | -2    | -3.64 | -2.73 | -2.47 | -2    | -     |       |       |       |    |
|          | 2.83       | -2.73      | -0.35 | -0.71 | -0.23 | -0.28 | -0.26 | -0.94 | -1.02 | -0.02 | -0.16 | -0.43 | -1.12 | -  |
|          | 0.76       | -1.02      | -1.02 | -1.64 | -1.83 | -1.05 | -1.15 | -1.18 | -0.15 | 0     | -0.71 | -0.26 |       |    |
| GENE213X | 16642_s_at | 16642_s_at | 1     | -1.25 | -1.55 | -2    | -1.73 | -1.39 | -1.05 | -     |       |       |       |    |
|          | 1.94       | -1.64      | 0.05  | -0.81 | -0.39 | -0.26 | -0.34 | -1.02 | -0.49 | 0.05  | -0.12 | -1.12 | -0.78 | -  |
|          | 0.51       | -0.76      | -0.49 | -1.32 | -0.91 | -0.68 | -0.62 | -0.59 | 0.04  | -0.26 | 0     | 0.09  |       |    |
| GENE212X | 18331_s_at | 18331_s_at | 1     | -2.12 | -2.12 | -3.32 | -3.05 | -2.83 | -1.88 | -     |       |       |       |    |
|          | 3.83       | -2.47      | -0.18 | -0.62 | -0.3  | -0.43 | -0.21 | -0.88 | -0.97 | -0.02 | -0.02 | -1.15 | -0.62 | -  |
|          | 0.91       | -1.15      | -0.86 | -2.32 | -1.83 | -1.35 | -0.76 | -0.55 | -0.13 | -0.37 | 0.11  | 0.18  |       |    |
| GENE653X | 19902_at   | 19902_at   | 1     | -1.18 | -0.71 | -1.69 | -1.64 | -1.28 | -1.15 | -     |       |       |       |    |
|          | 1.83       | -1.83      | 0.13  | -0.66 | -0.1  | 0.02  | 0     | -0.73 | -0.76 | 0.46  | 0.31  | -0.71 | -0.66 | -  |
|          | 0.34       | -0.91      | -0.57 | -0.76 | -0.59 | -0.2  | -0.62 | -0.66 | -0.41 | -0.28 | -0.04 | -0.04 |       |    |
| GENE650X | 20389_at   | 20389_at   | 1     | -1.64 | -1.15 | -2.73 | -2.32 | -2.83 | -2.55 | -     |       |       |       |    |
|          | 2.73       | -3.05      | -0.68 | -1.43 | -0.51 | -0.88 | -0.97 | -1.73 | -1.08 | 0.68  | 0.52  | -0.68 | -1.64 | -  |
|          | 0.57       | -1.78      | -2.12 | -1.21 | -0.88 | -0.32 | -0.32 | -1.43 | -0.73 | -0.71 | -0.12 | -0.02 |       |    |
| GENE102X | 17913_at   | 17913_at   | 1     | -2.12 | -0.91 | -2.25 | -2.32 | -2.18 | -2.55 | -     |       |       |       |    |
|          | 2.32       | -2.25      | -0.66 | -0.51 | -0.26 | -0.55 | -0.37 | -1.64 | -0.53 | -0.05 | 0     | -0.53 | -1.32 | -1 |
|          |            | -1.12      | -1.28 | -1    | -0.88 | -0.51 | -0.73 | -0.39 | 0     | 0.04  | -0.49 | -0.12 |       |    |
| GENE101X | 19898_at   | 19898_at   | 1     | -1.88 | -1    | -2.18 | -2.47 | -2.25 | -2    | -     |       |       |       |    |
|          | 3.05       | -2.39      | -0.76 | -0.57 | -0.43 | -0.45 | -0.45 | -1.73 | -0.78 | -0.2  | -0.1  | -0.83 | -1.39 | -  |
|          | 0.55       | -1.15      | -1.12 | -1    | -0.91 | -0.55 | -0.16 | -0.23 | -0.08 | 0.01  | -0.12 | -0.16 |       |    |
| GENE100X | 15369_at   | 15369_at   | 1     | -1.83 | -1.28 | -2.47 | -2.64 | -2.47 | -2.55 | -2    |       |       |       |    |
|          |            | -2.64      | -0.83 | -0.81 | -0.88 | -0.37 | -0.37 | -1.59 | -1.05 | -0.41 | -0.08 | -1.35 | -1.59 | -  |
|          | 0.94       | -1.47      | -1.21 | -1.73 | -1.59 | -0.64 | -0.3  | -0.94 | -0.13 | -0.23 | -0.26 | -0.3  |       |    |
| GENE99X  | 14820_g_at | 14820_g_at | 1     | -2.55 | -1.32 | -2.47 | -2.47 | -2.05 | -1.94 | -     |       |       |       |    |
|          | 3.83       | -2.73      | -0.18 | -0.83 | -0.81 | -0.81 | -0.76 | -2.12 | -1.21 | -0.28 | -0.08 | -1.02 | -1.83 | -  |
|          | 1.08       | -1.55      | -1.51 | -1.94 | -1.35 | -1.12 | -0.21 | -0.94 | -0.57 | -0.45 | -0.41 | -0.47 |       |    |
| GENE186X | 19447_s_at | 19447_s_at | 1     | -1.78 | -1.15 | -1.78 | -1.39 | -1.73 | -1.73 | -     |       |       |       |    |
|          | 1.69       | -1.55      | -0.39 | -0.37 | -0.16 | -0.2  | -0.71 | -0.97 | -0.81 | -0.16 | -0.53 | -0.1  | -0.15 | -  |
|          | 0.83       | -0.71      | -1.05 | -1    | -1.64 | -0.88 | -0.59 | -0.86 | -0.66 | -0.53 | -0.37 | 0.16  |       |    |
| GENE185X | 13649_at   | 13649_at   | 1     | -1.39 | -1.35 | -2.12 | -1.21 | -2    | -1.55 | -     |       |       |       |    |
|          | 1.64       | -1.59      | -0.59 | -0.25 | -0.15 | -0.3  | -0.45 | -0.76 | -0.43 | -0.02 | -0.35 | -0.28 | -0.59 | -  |
|          | 1.05       | -0.86      | -1.15 | -0.97 | -0.86 | -0.39 | -1.18 | -0.37 | -0.47 | -0.15 | -0.53 | 0.17  |       |    |
| GENE184X | 18588_at   | 18588_at   | 1     | -2.18 | -2.05 | -2.18 | -2.05 | -2.64 | -2.12 | -     |       |       |       |    |
|          | 2.39       | -2.55      | -0.55 | -0.34 | -0.05 | -0.53 | -0.68 | -1    | -0.35 | -0.05 | -0.88 | -0.25 | -0.59 | -  |
|          | 0.76       | -0.97      | -1.39 | -1.12 | -0.88 | -0.47 | -0.86 | -0.64 | -0.68 | -0.21 | 0.25  | 0.12  |       |    |
| GENE182X | 17050_s_at | 17050_s_at | 1     | -1.59 | -1.94 | -3.32 | -2    | -2.47 | -1.59 | -     |       |       |       |    |
|          | 3.18       | -2.73      | -0.86 | -1.51 | -0.23 | -0.78 | -1.28 | -1.78 | -1.78 | 0.09  | -0.18 | -0.51 | -0.97 | -  |
|          | 0.86       | -1.32      | -1.32 | -1.43 | -1.78 | -0.21 | -1.21 | -1.88 | -0.43 | -0.28 | 0     | 0.28  |       |    |
| GENE181X | 15553_at   | 15553_at   | 1     | -1.15 | -1.78 | -3.05 | -2.32 | -2.05 | -1.88 | -     |       |       |       |    |
|          | 2.39       | -1.73      | -0.76 | -0.86 | -0.32 | -0.66 | -0.68 | -0.91 | -1.35 | 0.33  | -0.26 | -0.32 | -0.94 | -  |
|          | 1.32       | -1.39      | -1.08 | -1.32 | -1.39 | -0.83 | -1.32 | -1.28 | -0.78 | -0.43 | -0.41 | -0.04 |       |    |

|          |            |            |       |       |       |       |       |       |       |       |       |       |       |   |
|----------|------------|------------|-------|-------|-------|-------|-------|-------|-------|-------|-------|-------|-------|---|
| GENE180X | 15521_at   | 15521_at   | 1     | -1.32 | -2.25 | -3.47 | -2.94 | -2.83 | -2.32 | -     |       |       |       |   |
|          | 2.83       | -2.64      | -0.83 | -1    | -0.55 | -0.62 | -0.68 | -1.02 | -1.05 | -0.08 | -0.25 | -0.73 | -1.28 | - |
|          | 0.91       | -1         | -1.69 | -1.39 | -1.05 | -0.59 | -1.02 | -1.25 | -0.51 | -0.51 | -0.3  | -0.07 |       |   |
| GENE179X | 14540_at   | 14540_at   | 1     | -1.55 | -1.83 | -3.32 | -2.64 | -2.83 | -2.83 | -     |       |       |       |   |
|          | 2.47       | -2.55      | -1.02 | -0.97 | -0.53 | -0.59 | -0.64 | -0.86 | -1.25 | -0.04 | -0.3  | -0.62 | -1.02 | - |
|          | 0.78       | -1.32      | -1.73 | -1.59 | -1.35 | -0.53 | -1.43 | -1.39 | -0.45 | -0.21 | -0.45 | 0     |       |   |
| GENE178X | 12122_at   | 12122_at   | 1     | -1.35 | -2.05 | -3.32 | -2.64 | -2.94 | -2.55 | -     |       |       |       |   |
|          | 3.32       | -2.94      | -0.83 | -0.71 | -0.64 | -0.55 | -0.39 | -1.08 | -0.88 | 0.42  | -0.16 | -0.81 | -1.08 | - |
|          | 0.68       | -1.59      | -1.21 | -2.32 | -1.51 | -0.73 | -1.18 | -1.51 | -0.53 | -0.81 | -0.53 | -0.12 |       |   |
| GENE309X | 18154_at   | 18154_at   | 1     | -1.15 | -0.73 | -0.71 | -0.88 | -1.32 | -1.05 | -     |       |       |       |   |
|          | 1.15       | -0.81      | -0.49 | -0.15 | -0.04 | -0.45 | -0.41 | -0.45 | 0.01  | 0.01  | 0.31  | -0.51 | -0.57 | - |
|          | 0.15       | -0.45      | -0.86 | -0.88 | -0.43 | -0.59 | -0.28 | 0.33  | 0.09  | 0.09  | -0.08 | 0.36  |       |   |
| GENE308X | 19144_at   | 19144_at   | 1     | -1.25 | -0.16 | -0.97 | -1.02 | -1.28 | -1    | -     |       |       |       |   |
|          | 1.21       | -0.88      | -0.3  | 0.01  | -0.08 | 0     | -0.1  | -0.28 | -0.01 | 0.09  | 0.23  | -0.28 | -0.78 | - |
|          | 0.35       | -0.39      | -0.68 | -0.88 | -0.83 | -0.62 | -0.57 | 0.07  | -0.21 | 0.02  | 0     | 0.12  |       |   |
| GENE307X | 19499_s_at | 19499_s_at | 1     | -1.69 | -0.78 | -1.64 | -1.64 | -2    | -1.32 | -2    |       |       |       |   |
|          | -1.47      | -0.23      | -0.07 | 0     | -0.32 | -0.15 | -0.57 | -0.28 | 0.29  | 0.71  | -0.53 | -0.57 | -     |   |
|          | 0.81       | -0.78      | -1.15 | -1.25 | -1.08 | -1    | -0.21 | -0.28 | 0.35  | 0.25  | -0.05 | -0.02 |       |   |
| GENE290X | 15647_s_at | 15647_s_at | 1     | -1    | -1.32 | -1.05 | -1.18 | -2    | -1.43 | -     |       |       |       |   |
|          | 1.59       | -0.91      | -0.51 | -0.41 | -0.39 | -0.16 | -0.76 | -0.71 | -0.68 | 0.18  | 0.13  | -0.04 | -0.91 | - |
|          | 0.86       | 0.15       | -1.12 | -0.51 | -1.18 | -1.05 | -0.91 | -0.2  | -0.21 | -0.15 | -0.34 | -0.12 |       |   |
| GENE256X | 14572_at   | 14572_at   | 1     | -1.25 | -1.47 | -1.83 | -1.32 | -2.18 | -1.69 | -     |       |       |       |   |
|          | 1.32       | -1.08      | -0.73 | 0.12  | 0.08  | -0.26 | -0.41 | -0.37 | -0.15 | 0.17  | -0.66 | -0.1  | -0.66 | - |
|          | 1.28       | -0.83      | -1.12 | -1.25 | -1.18 | -1.21 | -0.86 | -0.45 | -0.32 | -0.18 | 0.04  | 0.09  |       |   |
| GENE255X | 19734_at   | 19734_at   | 1     | -0.83 | -1.25 | -1.08 | -1.55 | -1.64 | -1.47 | -     |       |       |       |   |
|          | 1.08       | -1.08      | -0.86 | -0.41 | -0.41 | -0.25 | 0.02  | -0.68 | -0.21 | 0.07  | -0.21 | -0.1  | -0.97 | - |
|          | 0.59       | -0.83      | -0.97 | -1.35 | -0.78 | -0.68 | -0.86 | -0.41 | -0.26 | -0.49 | -0.23 | -0.2  |       |   |
| GENE226X | 15089_at   | 15089_at   | 1     | -0.66 | -0.55 | -0.76 | -0.76 | -1.05 | -0.97 | -     |       |       |       |   |
|          | 0.68       | -0.55      | -0.62 | -0.41 | -0.23 | -0.21 | -0.32 | -0.57 | -0.49 | 0.04  | 0.01  | -0.43 | -0.49 | - |
|          | 0.73       | -0.45      | -0.57 | -0.88 | -1.02 | -0.68 | -0.53 | -0.16 | -0.15 | -0.05 | -0.13 | 0.07  |       |   |
| GENE225X | 18301_s_at | 18301_s_at | 1     | -3.32 | -1.43 | -2    | -2.47 | -3.05 | -3.47 | -     |       |       |       |   |
|          | 2.05       | -1.83      | -0.91 | -0.55 | -0.64 | -1.05 | -0.68 | -1.35 | -1.08 | -0.1  | 0.01  | -1.12 | -1.69 | - |
|          | 1.51       | -2.25      | -2.47 | -2.12 | -3.05 | -1.55 | -1.25 | -0.32 | -0.39 | -0.07 | -0.32 | -0.37 |       |   |
| GENE224X | 16242_at   | 16242_at   | 1     | -2.32 | -1.21 | -1.39 | -1.78 | -2.12 | -1.94 | -     |       |       |       |   |
|          | 1.47       | -1.51      | -0.97 | -0.49 | -0.02 | -0.91 | -0.53 | -0.88 | -0.73 | 0.01  | -0.47 | -0.43 | -0.86 | - |
|          | 1.05       | -1.25      | -1.39 | -1.94 | -1.64 | -1.28 | -1.32 | -0.23 | 0.22  | 0.45  | -0.1  | 0.07  |       |   |
| GENE655X | 12022_at   | 12022_at   | 1     | -0.55 | -0.26 | -0.94 | -1.08 | -1.32 | -1.12 | -     |       |       |       |   |
|          | 1.18       | -1.39      | -0.76 | -0.78 | -0.12 | -0.16 | 0     | -1.12 | -0.55 | 0.26  | -0.02 | -0.21 | -0.86 | - |
|          | 0.21       | -0.68      | -0.91 | -0.91 | -0.73 | -0.68 | -1.21 | -0.49 | -0.16 | 0.05  | -0.18 | 0.12  |       |   |
| GENE654X | 13508_s_at | 13508_s_at | 1     | -1    | -0.78 | -2    | -2.18 | -1.88 | -1.51 | -     |       |       |       |   |
|          | 1.78       | -1.73      | -1.15 | -0.49 | -0.34 | -0.07 | 0.04  | -1.21 | -0.41 | 0.18  | 0.35  | -0.86 | -1.47 | - |
|          | 0.1        | -0.76      | -1.83 | -1.35 | -1.21 | -1.15 | -1.18 | -0.28 | -0.21 | 0.07  | -0.12 | 0.18  |       |   |
| GENE301X | 19466_s_at | 19466_s_at | 1     | -1.32 | -1.69 | -1.94 | -2.55 | -2.39 | -2.64 | -     |       |       |       |   |
|          | 2.73       | -2.39      | -1.05 | -0.37 | -0.49 | -0.73 | -0.68 | -1.51 | -0.73 | 0.13  | -0.45 | -1.21 | -1.25 | - |
|          | 1.35       | -1.05      | -2    | -2.12 | -1.83 | -1.47 | -0.78 | -0.51 | -0.04 | -0.07 | -0.35 | -0.45 |       |   |
| GENE300X | 13618_s_at | 13618_s_at | 1     | -1    | -0.83 | -1.55 | -1.47 | -2.05 | -1.73 | -     |       |       |       |   |
|          | 2.25       | -1.88      | -1.18 | -0.53 | -0.49 | -0.53 | -0.25 | -1    | -0.35 | 0.27  | -0.26 | -0.16 | -0.25 | - |
|          | 1.05       | -0.68      | -1.15 | -1.43 | -1.28 | -1.12 | -1    | 0.15  | -0.18 | -0.21 | 0.09  | -0.13 |       |   |
| GENE299X | 16949_s_at | 16949_s_at | 1     | -1.55 | -1.15 | -2    | -1.88 | -2.25 | -2.32 | -     |       |       |       |   |
|          | 3.05       | -2.47      | -0.68 | -0.45 | -0.32 | -0.55 | -0.76 | -1.55 | -0.71 | 0.12  | -0.32 | -0.51 | -0.25 | - |
|          | 0.86       | -0.78      | -1.51 | -1.55 | -1.78 | -1.18 | -0.57 | -0.16 | -0.12 | -0.18 | -0.04 | 0.15  |       |   |
| GENE295X | 15456_at   | 15456_at   | 1     | -0.68 | -1.08 | -2.12 | -1.88 | -2.12 | -2.12 | -     |       |       |       |   |
|          | 2.05       | -2         | -0.64 | -0.57 | -0.59 | -0.55 | -0.32 | -0.97 | -0.55 | 0.44  | 0.17  | -0.41 | -0.71 | - |
|          | 0.39       | -0.78      | -0.94 | -1.78 | -1.69 | -0.97 | -1.08 | -0.73 | -0.23 | -0.1  | -0.47 | -0.12 |       |   |
| GENE294X | 14021_r_at | 14021_r_at | 1     | -1    | -1.43 | -2.47 | -2.39 | -2.39 | -2.18 | -     |       |       |       |   |
|          | 2.73       | -2.47      | -0.73 | -0.81 | -0.49 | -0.07 | -0.21 | -1.15 | -1    | 0.32  | 0.41  | -0.78 | -1.43 | - |
|          | 0.66       | -0.86      | -1.32 | -1.94 | -1.51 | -1.39 | -1.05 | -0.71 | -0.15 | -0.08 | -0.62 | -0.1  |       |   |

|          |            |            |       |       |       |       |       |       |       |       |       |       |    |
|----------|------------|------------|-------|-------|-------|-------|-------|-------|-------|-------|-------|-------|----|
| GENE293X | 14020_i_at | 14020_i_at | 1     | -1.15 | -1.55 | -3.32 | -2.55 | -2.64 | -2.55 | -     |       |       |    |
| 3.64     | -3.05      | -0.86      | -0.73 | -0.45 | -0.13 | -0.3  | -1.18 | -1.02 | 0.36  | 0.45  | -0.64 | -1.35 | -  |
| 0.97     | -1.08      | -1.64      | -2.05 | -1.59 | -1.35 | -1.02 | -0.71 | -0.12 | -0.07 | -0.64 | -0.21 |       |    |
| GENE292X | 17596_at   | 17596_at   | 1     | -1.12 | -1.35 | -2.73 | -2.05 | -2.55 | -2.39 | -     |       |       |    |
| 2.55     | -2.64      | -0.66      | -0.49 | -0.21 | -0.01 | -0.15 | -1.02 | -0.64 | 0.45  | 0.13  | -0.53 | -1.25 | -  |
| 0.71     | -0.62      | -1.69      | -1.47 | -1.21 | -1.05 | -0.97 | -0.45 | -0.3  | -0.02 | -0.66 | -0.1  |       |    |
| GENE291X | 20197_at   | 20197_at   | 1     | -1.05 | -0.64 | -3.64 | -2.47 | -2.55 | -2.39 | -     |       |       |    |
| 3.64     | -2.83      | -1.05      | -0.76 | -0.88 | -0.26 | -0.64 | -1.51 | -1.02 | 0.23  | 0.31  | -1.15 | -1.02 | -  |
| 0.39     | -0.59      | -2.05      | -1.83 | -2    | -1.12 | -1.35 | -0.45 | -0.18 | -0.08 | -1.21 | 0.25  |       |    |
| GENE651X | 12015_at   | 12015_at   | 1     | -0.86 | -0.73 | -2.39 | -1.78 | -2.32 | -2.39 | -     |       |       |    |
| 2.05     | -2.05      | -0.97      | -0.97 | -0.08 | -0.25 | -0.2  | -0.91 | -0.86 | 0.23  | 0.46  | -0.83 | -1    | -  |
| 0.49     | -1         | -1.59      | -0.91 | -0.51 | -0.28 | -0.91 | -0.68 | -0.47 | -0.08 | -0.41 | 0.05  |       |    |
| GENE572X | 13301_at   | 13301_at   | 1     | -1.55 | -1.25 | -2.55 | -1.69 | -2.55 | -3.32 | -     |       |       |    |
| 1.64     | -2.47      | -1.55      | -0.76 | -0.21 | -0.39 | -0.59 | -0.83 | -0.81 | -0.13 | 0.18  | -0.15 | -0.97 | -  |
| 0.88     | -1.12      | -1.78      | -0.64 | -0.88 | -0.34 | -1.08 | -0.76 | -0.41 | -0.32 | -0.37 | -0.16 |       |    |
| GENE559X | 18976_at   | 18976_at   | 1     | -1.47 | -1.18 | -2.05 | -2.18 | -2.94 | -2.73 | -     |       |       |    |
| 2.55     | -2.32      | -0.59      | -0.3  | -0.01 | -0.37 | -0.34 | -0.94 | -0.71 | 0.02  | 0.2   | -0.71 | -1.25 | -  |
| 0.41     | -0.35      | -1.28      | -0.76 | -1.25 | -0.59 | -1.18 | -0.32 | -0.02 | 0.16  | -0.76 | -0.62 |       |    |
| GENE36X  | 15520_s_at | 15520_s_at | 1     | -0.43 | -0.49 | -1.28 | -0.88 | -1.55 | -1.28 | -     |       |       |    |
| 0.71     | -0.97      | -0.71      | -0.39 | -0.37 | -0.32 | -0.51 | -0.55 | -0.45 | -0.04 | -0.23 | -0.35 | -0.34 | -  |
| 0.59     | -0.32      | -1.12      | -0.55 | -0.41 | -0.62 | -0.59 | -0.26 | -0.25 | -0.15 | -0.26 | 0.07  |       |    |
| GENE35X  | 17084_s_at | 17084_s_at | 1     | -0.64 | -0.64 | -1.21 | -0.78 | -1.59 | -1.21 | -     |       |       |    |
| 1.51     | -1.32      | -0.68      | -0.37 | -0.3  | -0.53 | -0.71 | -0.64 | -0.47 | -0.16 | -0.62 | -0.21 | -0.39 | -  |
| 0.45     | -0.37      | -1.05      | -0.76 | -0.64 | -0.41 | -0.94 | -0.18 | -0.39 | -0.2  | 0.01  | -0.01 |       |    |
| GENE34X  | 19370_at   | 19370_at   | 1     | -1.08 | -1.64 | -2.12 | -1.73 | -2.64 | -2.32 | -     |       |       |    |
| 2.12     | -2.12      | -1.39      | -0.88 | -0.2  | -0.88 | -0.94 | -1.35 | -0.97 | -0.25 | -0.66 | -0.41 | -0.86 | -  |
| 0.23     | -0.68      | -1.64      | -1.35 | -1.25 | -0.86 | -1.51 | -0.43 | -0.47 | -0.12 | -0.18 | -0.16 |       |    |
| GENE33X  | 13663_s_at | 13663_s_at | 1     | -0.73 | -0.66 | -2.12 | -1.55 | -2.12 | -1.69 | -     |       |       |    |
| 1.94     | -1.39      | -0.91      | -0.34 | -0.2  | -0.59 | -0.71 | -1.12 | -0.68 | -0.08 | -0.55 | -0.28 | -0.71 | -  |
| 0.2      | -0.71      | -1.32      | -0.97 | -0.78 | -0.55 | -0.86 | -0.21 | -0.51 | -0.02 | -0.07 | 0.12  |       |    |
| GENE32X  | 17565_s_at | 17565_s_at | 1     | -1.88 | -1.18 | -2.47 | -1.69 | -3.05 | -2.55 | -     |       |       |    |
| 2.12     | -2.55      | -1.21      | -0.34 | -0.15 | 0     | -0.76 | -1.32 | -0.73 | -0.51 | -0.78 | -0.45 | -0.97 | -  |
| 0.43     | -0.62      | -1.51      | -1.12 | -1.51 | -0.81 | -1.78 | -0.12 | -0.55 | 0.38  | -0.64 | 0.16  |       |    |
| GENE223X | 17495_s_at | 17495_s_at | 1     | -0.94 | -0.55 | -0.73 | -1.18 | -1.15 | -1    | -     |       |       |    |
| 0.91     | -1.18      | -0.59      | -0.45 | -0.3  | -0.39 | -0.41 | -0.91 | -0.53 | -0.12 | -0.53 | -0.18 | -0.25 | -  |
| 0.71     | -1.02      | -0.62      | -1.05 | -1.05 | -0.62 | -0.47 | -0.32 | -0.28 | -0.43 | -0.13 | -0.26 |       |    |
| GENE222X | 16613_s_at | 16613_s_at | 1     | -3.64 | -2.47 | -2.83 | -2.94 | -3.18 | -3.05 | -     |       |       |    |
| 2.83     | -3.05      | -1         | -1.51 | -0.83 | -1.78 | -1.32 | -2    | -0.71 | -0.76 | -1.47 | -1.05 | -1.21 | -2 |
|          | -3.18      | -2.05      | -3.05 | -2.47 | -1.21 | -0.51 | -0.47 | -0.39 | -0.18 | -0.71 | -0.53 |       |    |
| GENE221X | 15100_f_at | 15100_f_at | 1     | -1.94 | -1    | -1.88 | -1.83 | -2    | -2.18 | -     |       |       |    |
| 2.39     | -1.88      | -0.49      | 0.12  | -0.55 | -0.59 | -0.68 | -1.08 | -0.18 | -0.53 | -1    | -0.53 | -1.51 | -  |
| 1.08     | -1.47      | -1.43      | -1.69 | -1.69 | -1.43 | -0.59 | -0.39 | -0.49 | -0.47 | -0.05 | -0.04 |       |    |
| GENE2X   | 18890_at   | 18890_at   | 1     | -2.18 | -2.47 | -2.12 | -2.55 | -2.83 | -3.18 | -     |       |       |    |
| 3.18     | -3.05      | -1.21      | -0.76 | -0.81 | -1.18 | -1.25 | -2.55 | -0.83 | -0.86 | -0.57 | -1.43 | -1.43 | -1 |
|          | -0.94      | -2.39      | -2    | -1    | -0.37 | -0.71 | -0.76 | 0.12  | -0.26 | -0.47 | -0.15 |       |    |
| GENE1X   | 12048_at   | 12048_at   | 1     | -2.64 | -2.32 | -3.05 | -2.73 | -3.32 | -4.05 | -     |       |       |    |
| 3.83     | -3.83      | -1.21      | -1.25 | -0.04 | -0.81 | -0.86 | -2.39 | -0.94 | -0.47 | -0.81 | -0.51 | -0.94 | -  |
| 1.35     | -1.25      | -2.47      | -1.83 | -1.18 | -0.51 | -1.02 | -0.07 | -0.37 | -0.26 | -0.62 | -0.45 |       |    |
| GENE0X   | 12169_i_at | 12169_i_at | 1     | -2.39 | -1.12 | -2.18 | -2.12 | -2.73 | -4.32 | -     |       |       |    |
| 2.05     | -3.18      | -1.69      | -0.02 | -0.37 | -0.62 | -0.91 | -2.18 | -1.15 | -0.71 | -0.53 | -0.73 | -1.43 | -  |
| 1.32     | -1.59      | -2.18      | -1.83 | -1.73 | -1.32 | -0.28 | -0.35 | -0.08 | -0.39 | -0.66 | -0.57 |       |    |
| GENE227X | 12054_at   | 12054_at   | 1     | -1.59 | -0.64 | -1.59 | -0.86 | -1.43 | -1.88 | -     |       |       |    |
| 1.28     | -1.39      | -0.35      | -1    | -0.05 | -0.59 | 0.02  | -0.94 | -1    | -0.1  | -0.25 | -0.34 | -0.94 | -  |
| 0.43     | -0.91      | -0.68      | -0.86 | -0.97 | -0.28 | -0.34 | -0.32 | -0.28 | -0.1  | -0.05 | 0.04  |       |    |
| GENE90X  | 14531_at   | 14531_at   | 1     | -1.78 | -1.21 | -1.43 | -1.88 | -1.69 | -1.94 | -     |       |       |    |
| 1.47     | -1.39      | -0.16      | -0.43 | -0.12 | -0.37 | -0.28 | -1.18 | -1    | 0.05  | -0.01 | -0.32 | -0.97 | -  |
| 1.18     | -0.76      | -0.47      | -0.81 | -0.88 | -0.51 | -0.18 | -0.32 | -0.2  | -0.1  | -0.32 | -0.25 |       |    |

|           |            |            |       |       |       |       |       |       |       |       |       |       |   |
|-----------|------------|------------|-------|-------|-------|-------|-------|-------|-------|-------|-------|-------|---|
| GENE89X   | 13561_at   | 13561_at   | 1     | -3.32 | -1.94 | -1.83 | -2.55 | -2.55 | -2.64 | -     |       |       |   |
| 1.51      | -2.39      | -0.64      | -1    | -0.45 | -0.64 | -0.32 | -1.64 | -0.88 | -0.43 | -0.41 | -0.62 | -1.51 | - |
| 1.08      | -1.32      | -1.08      | -1.32 | -1.25 | -0.64 | -1.15 | -0.68 | -0.2  | -0.05 | -0.62 | -0.53 |       |   |
| GENE26X   | 15510_r_at | 15510_r_at | 1     | -1.28 | -0.57 | -1.32 | -1.39 | -1.39 | -1.39 | -1.43 | -     |       |   |
| 1.12      | -1.18      | -0.71      | -0.83 | -0.18 | -0.18 | -0.23 | -0.71 | -1.05 | -0.41 | 0.11  | -0.76 | -0.83 | - |
| 0.81      | -1.05      | -1.28      | -0.94 | -0.73 | 0.15  | -0.73 | -0.45 | -0.37 | -0.04 | -0.37 | 0.22  |       |   |
| GENE25X   | 13023_at   | 13023_at   | 1     | -2.32 | -0.94 | -2.05 | -3.18 | -1.83 | -2.73 | -     |       |       |   |
| 1.88      | -1.88      | -0.68      | -1.25 | -1    | -0.73 | -0.68 | -1.25 | -1.32 | -0.53 | -0.12 | -1.43 | -1.47 | - |
| 0.68      | -2.18      | -1.35      | -2.05 | -1.47 | -1.02 | -0.71 | -0.59 | -0.76 | -0.68 | -0.02 | 0.32  |       |   |
| GENE24X   | 17577_g_at | 17577_g_at | 1     | -2.94 | -1.21 | -3.32 | -3.64 | -2.39 | -2.55 | -     |       |       |   |
| 2.18      | -2.64      | -0.78      | -1.55 | -0.97 | -1.47 | -1.51 | -1.73 | -1.69 | -0.21 | 0.04  | -1.25 | -2    | - |
| 1.08      | -1.88      | -2         | -2.12 | -1.64 | -0.88 | -0.49 | -0.62 | -0.3  | 0.01  | -0.2  | -0.35 |       |   |
| GENE23X   | 17576_at   | 17576_at   | 1     | -3.05 | -1.12 | -2.94 | -3.64 | -2.64 | -2.64 | -     |       |       |   |
| 2.47      | -2.32      | -0.88      | -1.28 | -0.94 | -1.35 | -1.35 | -1.88 | -1.51 | -0.45 | -0.08 | -1.18 | -1.83 | - |
| 1.12      | -1.78      | -1.78      | -2    | -1.69 | -0.97 | -0.49 | -0.57 | -0.26 | -0.07 | -0.23 | -0.49 |       |   |
| GENE22X   | 20452_s_at | 20452_s_at | 1     | -3.32 | -1.64 | -2.94 | -3.47 | -2.83 | -2.64 | -     |       |       |   |
| 2.32      | -2.32      | -1.18      | -2.47 | -1.02 | -1.51 | -1.51 | -1.47 | -1.94 | -0.45 | -0.57 | -1.32 | -2.25 | - |
| 1.51      | -1.73      | -2.05      | -2.73 | -1.69 | -1.21 | -0.76 | -0.68 | -0.28 | -0.32 | -0.15 | -0.32 |       |   |
| GENE1456X | 12697_at   | 12697_at   | 1     | -0.12 | 0.27  | 0.8   | 0.43  | 0.12  | -0.78 | -     |       |       |   |
| 0.23      | -1.25      | -0.57      | -0.26 | -0.32 | 0.13  | -0.04 | -0.88 | -0.66 | -0.39 | -0.39 | -0.39 | -1.28 | - |
| 0.59      | -0.3       | -0.23      | -0.26 | -0.39 | -0.02 | -0.04 | -2.25 | 0.17  | 0.34  | -0.88 | -0.3  |       |   |
| GENE1102X | 19180_at   | 19180_at   | 1     | -0.39 | -0.25 | 0     | 0     | -0.13 | -1.64 | -     |       |       |   |
| 0.91      | -1.88      | -1         | -0.25 | 0.08  | 0.64  | -0.15 | -1.64 | -0.04 | -0.39 | -1.18 | -0.15 | -0.47 | - |
| 0.73      | -0.41      | -0.78      | 0.13  | -0.1  | 0.08  | 0.37  | -0.47 | -0.21 | -0.28 | -0.47 | -0.53 |       |   |
| GENE1101X | 12422_at   | 12422_at   | 1     | -0.51 | -0.18 | -0.05 | -0.12 | -0.32 | -0.32 | -     |       |       |   |
| 0.91      | -1.18      | -0.45      | -0.45 | -0.23 | -0.37 | -0.23 | -1.32 | -0.25 | -0.23 | -0.43 | 0     | 0     | - |
| 0.83      | -0.21      | -0.26      | 0     | 0     | 0.04  | 0.6   | -0.78 | -0.97 | -0.34 | -0.12 | -0.39 |       |   |
| GENE1090X | 20499_at   | 20499_at   | 1     | -0.39 | -0.57 | -0.35 | -0.62 | 0.18  | -0.88 | -     |       |       |   |
| 0.86      | -1.12      | -0.08      | -0.1  | -0.71 | -0.94 | -1    | -1.15 | -0.57 | -0.45 | -0.12 | -0.62 | -1.02 | - |
| 0.34      | -0.3       | 0.02       | -0.53 | -0.41 | 0.22  | 0.05  | -1.32 | 0.05  | 0     | -0.3  | -0.18 |       |   |
| GENE1089X | 17415_at   | 17415_at   | 1     | -0.45 | -0.76 | -0.37 | -0.73 | -0.25 | -0.53 | -     |       |       |   |
| 0.81      | -1.28      | -0.35      | -0.39 | -0.62 | -0.97 | -0.71 | -0.91 | -0.59 | -0.62 | -0.39 | -0.78 | -0.57 | - |
| 0.68      | -0.23      | 0.07       | -0.16 | 0.01  | -0.12 | -0.2  | -0.23 | 0.27  | 0.13  | -0.47 | -0.26 |       |   |
| GENE1088X | 15591_s_at | 15591_s_at | 1     | -0.49 | -1.47 | -0.47 | -0.49 | -1.08 | -1.21 | -     |       |       |   |
| 1.32      | -1.39      | -0.47      | -0.73 | -0.28 | -1.02 | -1.18 | -1.64 | -0.94 | -0.3  | -0.41 | -0.2  | -0.64 | - |
| 1.35      | -0.78      | 0.33       | 0.08  | -0.26 | -0.07 | -0.32 | -1.83 | -0.13 | -0.16 | -0.81 | -1.12 |       |   |
| GENE1087X | 19987_at   | 19987_at   | 1     | 0.21  | 0.17  | -1    | -1.32 | -0.57 | -1.39 | -     |       |       |   |
| 0.59      | -0.66      | -0.71      | -0.16 | -0.88 | -0.51 | -0.45 | -0.49 | -1.18 | -0.62 | -0.76 | -0.73 | -0.86 | - |
| 0.59      | -0.16      | 0.28       | 0.16  | -0.25 | -0.59 | 0.04  | -1.55 | -0.3  | -0.25 | -0.91 | -0.73 |       |   |
| GENE1084X | 15215_s_at | 15215_s_at | 1     | -0.15 | -1.05 | -0.1  | 0.27  | 0.02  | -0.49 | -     |       |       |   |
| 0.88      | -0.88      | -0.43      | -0.81 | -0.47 | -1.02 | -0.78 | -1.18 | -1.05 | -0.53 | -0.49 | -0.59 | -0.83 | - |
| 0.51      | -0.71      | -0.47      | -0.07 | -0.15 | -0.08 | -0.25 | -0.66 | -0.05 | -0.07 | -0.26 | -0.43 |       |   |
| GENE1083X | 13554_at   | 13554_at   | 1     | -0.18 | -0.94 | -0.32 | -0.35 | -0.45 | -0.73 | -     |       |       |   |
| 1.05      | -1.25      | -0.88      | -1.28 | -1.15 | -1.21 | -1.08 | -1.83 | -1.21 | -0.97 | -0.86 | -0.94 | -0.78 | - |
| 0.49      | -0.83      | -1.05      | -0.78 | -0.76 | -0.64 | -0.53 | -0.35 | -0.43 | -0.37 | -0.28 | -0.26 |       |   |
| GENE1058X | 16021_at   | 16021_at   | 1     | -1.05 | -0.66 | 0.32  | -0.94 | 0.17  | -0.55 | -     |       |       |   |
| 0.21      | -0.41      | -0.71      | -1.51 | -2.25 | -1.39 | -1.21 | -1.94 | -1.21 | -1.69 | -1.25 | -1.88 | -1.25 | - |
| 0.76      | -0.73      | -0.55      | -0.05 | 0.13  | -0.1  | 0.02  | -0.78 | -0.21 | -0.81 | -1    | -0.97 |       |   |
| GENE1057X | 20015_at   | 20015_at   | 1     | -1.39 | -1.39 | -1.73 | -1.12 | -0.71 | -1.59 | -     |       |       |   |
| 0.51      | -1.59      | -2.32      | -1.94 | -1.47 | -1.28 | -1    | -2.73 | -1.73 | -2    | -2.25 | -1.18 | -0.81 | - |
| 1.21      | -0.97      | -1.43      | 1     | 1.13  | 0.54  | -1.28 | -1.59 | -0.18 | -1.32 | -0.25 | -1.83 |       |   |
| GENE1243X | 13569_at   | 13569_at   | 1     | -0.3  | -0.16 | -0.15 | -0.07 | -0.55 | -1.35 | -     |       |       |   |
| 0.12      | -0.1       | -1.08      | -0.88 | -0.78 | -0.62 | -0.86 | -1.43 | -0.71 | -0.45 | -0.66 | -0.1  | -     |   |
| 0.73      | -0.04      | -0.08      | -1.43 | -0.32 | -0.76 | -1.08 | -0.28 | 0.17  | -0.13 | 0     | -0.13 | -0.37 | - |
| GENE1242X | 15554_at   | 15554_at   | 1     | 0.34  | -0.71 | 0.07  | 0.22  | -0.97 | -0.73 | -     |       |       |   |
| 0.71      | -0.3       | -1.69      | -1.28 | -0.83 | -0.97 | -0.97 | -1.05 | -0.23 | -0.25 | -0.64 | -0.41 | -0.32 | - |
| 0.08      | 1.01       | -1.59      | 0.93  | 0.47  | -0.39 | -0.02 | -0.15 | -0.41 | -0.49 | -0.45 | -0.3  |       |   |

|           |            |            |       |       |       |       |       |       |       |       |       |       |
|-----------|------------|------------|-------|-------|-------|-------|-------|-------|-------|-------|-------|-------|
| GENE1245X | 13441_at   | 13441_at   | 1     | -0.83 | 0.02  | -0.02 | -0.16 | -0.47 | -0.97 | -     |       |       |
| 0.41      | -1.28      | -0.34      | -0.26 | -0.45 | -0.64 | -0.59 | -1.05 | -0.45 | -0.21 | -0.07 | -0.73 | -0.35 |
|           | 0.44       | 0.41       | -0.51 | -0.18 | -0.13 | -0.1  | -0.1  | 0.17  | -0.13 | 0.12  | -0.16 | -0.16 |
| GENE1244X | 18564_at   | 18564_at   | 1     | -0.53 | -0.23 | 0.95  | 0.63  | -0.53 | -1.39 | -     |       |       |
| 0.23      | -1.43      | -0.37      | -0.57 | -0.39 | -0.28 | -0.73 | -1.02 | -0.49 | -0.15 | 0.08  | -0.23 | -0.23 |
|           | 0.07       | 0.21       | -0.83 | 0.13  | 0.01  | 0.01  | -0.55 | -0.15 | -0.08 | -0.26 | -0.2  | -0.23 |
| GENE1262X | 14401_at   | 14401_at   | 1     | -0.18 | 0.32  | 0.46  | 0.69  | 1.11  | -0.91 | -     |       |       |
| 0.23      | -1.12      | 0.08       | -1.25 | -0.25 | -1.55 | -1.05 | -1.32 | -0.97 | -0.66 | -0.59 | -0.45 | -     |
| 0.86      | -0.37      | -0.47      | -0.51 | -0.68 | -0.51 | -0.15 | 0.13  | 0.26  | 0.05  | 0.16  | -0.21 | -0.1  |
| GENE1061X | 18250_at   | 18250_at   | 1     | -0.35 | -0.73 | -0.13 | -0.02 | 0.25  | -0.64 | -     |       |       |
| 0.39      | -1.25      | 0.2        | -0.73 | -0.28 | -0.59 | -0.39 | -0.55 | -1.12 | -0.25 | 0.01  | -0.2  | -0.25 |
| 0.3       | -0.28      | -0.13      | -0.34 | -0.32 | -0.28 | -0.01 | 0.09  | 0.01  | -0.21 | 0.02  | 0     | -     |
| GENE1086X | 14011_at   | 14011_at   | 1     | 0     | -0.16 | -0.35 | -0.88 | 0.37  | -1.78 | -     |       |       |
| 0.62      | -1.73      | -0.78      | -0.86 | -0.59 | -0.49 | -0.32 | -1.25 | -0.64 | -0.3  | -0.45 | -1    | -1.32 |
|           | -1.08      | -0.94      | -0.81 | -0.21 | 0.08  | -0.32 | -0.66 | -0.08 | -0.35 | -0.16 | 0     | -     |
| GENE1085X | 14037_at   | 14037_at   | 1     | 0.21  | -0.12 | 0.23  | 0.16  | 0.11  | -0.86 | -     |       |       |
| 0.53      | -1.47      | -0.76      | -0.86 | -0.37 | -0.62 | -0.41 | -1.32 | -0.45 | -0.08 | -0.13 | -0.41 | -0.71 |
| 1.08      | -0.49      | -0.73      | -1.35 | -1.39 | -1.21 | -0.71 | -0.28 | 0.02  | 0.05  | -0.57 | -0.37 | -     |
| GENE1100X | 18273_at   | 18273_at   | 1     | -0.12 | -0.37 | -0.3  | -0.3  | -0.23 | -0.76 | -     |       |       |
| 0.43      | -1.32      | -0.37      | -1.18 | -0.47 | -0.78 | -0.66 | -1.39 | -0.66 | -0.39 | -0.53 | -0.45 | -0.1  |
| 0.12      | -0.02      | -0.12      | -0.21 | -0.28 | -0.16 | -0.23 | -0.35 | -0.43 | -0.25 | -0.3  | 0.02  | -     |
| GENE1099X | 12674_at   | 12674_at   | 1     | -0.3  | 0.02  | 0.36  | -0.3  | -0.62 | -1.18 | -     |       |       |
| 0.66      | -2.73      | -0.68      | -1.47 | -0.97 | -0.73 | -0.76 | -1.55 | -0.66 | -0.68 | -0.35 | -1.08 | -0.39 |
| 0.16      | 0.08       | -0.23      | -0.35 | -0.28 | -0.12 | -0.13 | 0.13  | -0.18 | -0.08 | -0.55 | -0.35 | -     |
| GENE1000X | 20190_at   | 20190_at   | 1     | -1    | -1    | 0.17  | -0.2  | -1.25 | -2.32 | -     |       |       |
| 0.86      | -1.78      | -1.59      | -1.08 | -0.76 | -1.18 | -0.86 | -1.59 | -0.81 | -1.18 | -1.88 | -0.41 | -1.08 |
| 0.94      | -0.45      | -1.64      | -0.83 | -0.41 | -0.15 | -0.23 | -0.76 | 0.04  | -0.39 | -1.12 | -0.88 | -     |
| GENE436X  | 12020_at   | 12020_at   | 1     | -1.32 | -0.25 | -0.13 | -0.81 | -0.81 | -0.97 | -     |       |       |
| 0.59      | -1.25      | -0.59      | -0.73 | 0.01  | -0.76 | -0.35 | -1.15 | -0.62 | -0.49 | -0.71 | -0.18 | -0.41 |
| 0.15      | -0.49      | -0.37      | -0.62 | -0.47 | -0.35 | -1.02 | -0.34 | -0.41 | -0.13 | -0.62 | -0.45 | -     |
| GENE1106X | 16252_at   | 16252_at   | 1     | 0.38  | -0.73 | -0.15 | -1    | -1.08 | -0.81 | -     |       |       |
| 0.43      | -0.39      | -0.83      | -1.28 | -0.78 | -1.28 | -0.51 | -0.26 | -1.28 | 0.18  | 0.32  | -0.83 | 0     |
| 0.47      | -0.02      | -0.12      | -0.21 | 0.26  | 0.21  | 0.82  | 0.76  | 0.48  | 0.18  | 0.44  | -0.05 | -     |
| GENE1105X | 20178_at   | 20178_at   | 1     | -0.64 | -0.78 | -0.62 | -0.88 | -1.32 | -1.32 | -     |       |       |
| 0.09      | 0.12       | -1.32      | -0.81 | -1.15 | -1.12 | -1.28 | -0.18 | -1.28 | -0.94 | -0.59 | -1.28 | -     |
| 0.49      | 0.2        | -0.62      | -0.57 | -0.62 | -0.16 | 0.01  | 0.22  | 0.79  | -0.1  | 0.2   | 0.47  | 0.11  |
| GENE1060X | 13514_s_at | 13514_s_at | 1     | -1.15 | -1.78 | -1.18 | -1.39 | -0.47 | -1.43 | -     |       |       |
| 0.15      | -0.91      | -0.62      | -2.83 | -1.35 | -2.83 | -1.78 | -1.12 | -2.83 | -1.35 | -1    | -1.39 | -0.68 |
| 0.88      | -0.66      | 0.17       | -0.47 | -0.25 | -0.18 | 0.29  | 0.62  | 0.09  | 0.31  | -0.2  | -0.39 | -     |
| GENE1032X | 13558_s_at | 13558_s_at | 1     | -1.25 | -0.26 | 0.09  | -1    | -0.34 | -1.15 | -     |       |       |
| 0.53      | 0.01       | -0.08      | -0.49 | -0.28 | -0.73 | -0.62 | -0.43 | -1.51 | -0.28 | -0.2  | -0.41 | -     |
| 0.64      | -0.35      | -0.68      | -0.53 | -0.43 | 0     | -0.02 | 0.16  | 0.27  | 0.2   | 0.26  | 0.44  | 0.13  |
| GENE1031X | 20155_s_at | 20155_s_at | 1     | -0.66 | -0.39 | -0.23 | -0.83 | -0.71 | -1.05 | -     |       |       |
| 0.47      | -0.83      | -0.37      | -0.57 | -0.28 | -1.12 | -0.88 | -0.64 | -1.28 | -0.32 | 0.13  | -0.78 | -0.2  |
| 0.55      | -0.94      | -0.59      | -0.78 | -0.41 | -0.1  | 0.15  | -0.18 | 0.05  | -0.21 | 0.28  | 0.16  | -     |
| GENE1030X | 16543_s_at | 16543_s_at | 1     | -0.88 | -1.05 | -0.39 | -0.81 | -0.83 | -0.49 | -     |       |       |
| 0.35      | -0.41      | -0.13      | -0.51 | -0.3  | -1    | -0.97 | -0.16 | -1.21 | -0.25 | -0.21 | -0.55 | -     |
| 0.45      | -0.59      | -0.97      | -0.76 | -1.28 | -0.62 | -0.41 | 0     | 0.01  | 0.11  | -0.3  | 0.05  | -0.07 |
| GENE1098X | 18270_at   | 18270_at   | 1     | -2.18 | -0.91 | -0.07 | -0.28 | -0.25 | -1.35 | -     |       |       |
| 1.43      | -2.32      | -0.97      | -0.88 | -1.28 | -1.21 | -1.28 | -2.47 | -0.94 | -1.78 | -1.88 | -1.12 | -0.76 |
| 0.55      | 0.18       | -0.23      | 0.69  | 0.61  | 0.33  | 0.79  | 1     | 0.22  | -0.05 | -0.86 | -0.73 | -     |
| GENE1097X | 17961_at   | 17961_at   | 1     | -1.51 | -0.07 | -0.35 | -0.66 | -0.57 | -1.32 | -     |       |       |
| 1.69      | -2.25      | -0.94      | -0.28 | -0.68 | -1.18 | -0.57 | -1.32 | -1.18 | -1.43 | -1.94 | -0.81 | -0.76 |
| 0.35      | -0.05      | -1.18      | 0.52  | 0.22  | 0.2   | -0.37 | 0.53  | -0.37 | -0.23 | -0.13 | -0.15 | -     |
| GENE1096X | 15084_at   | 15084_at   | 1     | -1.02 | -0.07 | -0.64 | -0.16 | -0.78 | -2.05 | -     |       |       |
| 1.59      | -2.55      | -1.18      | -0.73 | -0.35 | -0.62 | -0.71 | -2.32 | -1.05 | -0.66 | -1.32 | -0.71 | -0.73 |
|           | 0.17       | -0.15      | -1.32 | 0.17  | 0.43  | 0.13  | 0.32  | 0.31  | -0.3  | -0.43 | 0.09  | 0.21  |

|           |            |            |       |       |       |       |       |       |       |       |       |       |   |
|-----------|------------|------------|-------|-------|-------|-------|-------|-------|-------|-------|-------|-------|---|
| GENE1047X | 17386_at   | 17386_at   | 1     | -1    | -0.26 | -1.78 | -0.91 | -0.88 | -0.39 | -     |       |       |   |
| 1.78      | -1.64      | -0.91      | -2.05 | -0.97 | -2.18 | -0.49 | -1.59 | -1.55 | -1.12 | -1    | -0.66 | -0.43 | - |
| 0.2       | -0.15      | -0.76      | 1.02  | 1.29  | 0.44  | -0.62 | 0.12  | 0.12  | -0.12 | -0.34 | 0.58  |       |   |
| GENE1046X | 15469_at   | 15469_at   | 1     | -0.62 | -0.35 | -0.41 | -0.59 | -0.97 | -1    | -     |       |       |   |
| 0.45      | -0.86      | -1.05      | -2.18 | -1.08 | -0.45 | -0.76 | -1.25 | -2.32 | -1.25 | -0.57 | -0.83 | -0.49 | 0 |
|           | -0.18      | -0.68      | -0.05 | 0.08  | -0.3  | -0.23 | 0.57  | -0.16 | -0.3  | -0.15 | -0.39 |       |   |
| GENE1045X | 18761_at   | 18761_at   | 1     | -0.45 | -0.81 | -0.81 | -0.73 | -1    | -1.28 | -     |       |       |   |
| 1.05      | -1.73      | -1.64      | -1.73 | -2.25 | -1.55 | -1.21 | -2.39 | -1.55 | -1.25 | -0.68 | -1.21 | -0.35 | - |
| 0.73      | 0.02       | -0.32      | 0.05  | 0.11  | 0.18  | 0.46  | 0.44  | 0.17  | 0.05  | -0.47 | -0.57 |       |   |
| GENE1044X | 19199_at   | 19199_at   | 1     | -0.45 | -0.73 | -0.97 | -0.78 | -1    | -0.76 | -     |       |       |   |
| 0.88      | -0.81      | -1.43      | -1.12 | -0.73 | -1.02 | -1    | -1.59 | -0.83 | -0.66 | -1.15 | -0.66 | -0.47 | - |
| 0.28      | -0.35      | -1.39      | -0.04 | -0.05 | -0.43 | 0.15  | 0.54  | -0.23 | -0.49 | -0.25 | -0.55 |       |   |
| GENE1270X | 18048_at   | 18048_at   | 1     | -1.94 | -0.73 | -0.51 | -0.83 | -0.35 | -0.47 | -     |       |       |   |
| 0.53      | -0.86      | -0.2       | -0.26 | -0.26 | -0.23 | -0.88 | -1.15 | -0.39 | -0.23 | -1.25 | -0.41 | -0.86 | - |
| 0.51      | -0.32      | -0.28      | 0.52  | 0.49  | 0.73  | 0.84  | 0.22  | -0.32 | 0.13  | 0.45  | 0.29  |       |   |
| GENE1269X | 20282_at   | 20282_at   | 1     | -0.94 | -1.59 | -1.55 | -2    | -0.78 | -0.64 | -     |       |       |   |
| 1.43      | -1.78      | -0.2       | -0.81 | -0.59 | -0.88 | -0.91 | -1.21 | -2    | -0.45 | -0.51 | -0.86 | 0.37  | - |
|           | 0.04       | -0.71      | 1.11  | 0.34  | 0.47  | 0.63  | 0.65  | 0.12  | 0.08  | 0.2   | 0.38  | -0.18 |   |
| GENE1268X | 13562_at   | 13562_at   | 1     | -0.55 | -0.94 | -1.35 | -1.02 | -0.55 | -0.81 | -     |       |       |   |
| 1.35      | -1.32      | -0.55      | -1.51 | -1.25 | -1.39 | -1.12 | -1.59 | -1.39 | -0.71 | -0.57 | -1.05 | -0.41 | - |
|           | 0.01       | -0.02      | 0.43  | 0.56  | 0.6   | 0.63  | 0.05  | -0.05 | -0.04 | -0.12 | 0     | -0.13 |   |
| GENE1267X | 20372_at   | 20372_at   | 1     | -1.83 | -2.94 | -1.59 | -1.73 | -1.94 | -1.73 | -     |       |       |   |
| 2.83      | -3.47      | -0.71      | -2.64 | -1.55 | -2.83 | -2.18 | -3.83 | -1.88 | -1.43 | -0.64 | -0.53 | 0.42  | - |
|           | 1.47       | 0.73       | 1.91  | 1.3   | 1.68  | 1.02  | 1.64  | 0.44  | 0.23  | 0.18  | -0.02 | -0.04 |   |
| GENE971X  | 17996_at   | 17996_at   | 1     | -0.76 | -0.51 | -0.64 | -0.64 | -0.66 | -1.18 | -     |       |       |   |
| 0.57      | -1.32      | -0.35      | 0.13  | -0.28 | -0.15 | -0.28 | -0.78 | -0.25 | 0.05  | -0.08 | -0.47 | -0.62 | - |
|           | 0.16       | -0.26      | -0.49 | 0.31  | 0.53  | 0.54  | -0.1  | 0.08  | 0.18  | 0.09  | 0.04  | 0.08  |   |
| GENE970X  | 20612_s_at | 20612_s_at | 1     | -1.15 | -0.47 | -1.39 | -2    | -1.21 | -1.47 | -     |       |       |   |
| 1.08      | -1.51      | -0.88      | -0.12 | -0.62 | 0.02  | -0.35 | -1.39 | -0.57 | -0.02 | -0.18 | -1.12 | -1.15 | - |
|           | 0.32       | -0.47      | -0.94 | -0.05 | 0.31  | 0.66  | -0.26 | 0.07  | 0     | 0.15  | 0.38  | 0.22  |   |
| GENE984X  | 19955_at   | 19955_at   | 1     | -0.97 | -0.53 | -0.78 | -0.94 | -0.64 | -0.73 | -     |       |       |   |
| 0.73      | -1.18      | 0.08       | -0.34 | -0.13 | -0.37 | -0.28 | -0.62 | -0.55 | -0.13 | 0.11  | -0.32 | -0.62 | - |
| 0.18      | -0.32      | -0.32      | -0.26 | -0.13 | 0.08  | 0.23  | 0.02  | 0.02  | -0.08 | 0.28  | -0.15 |       |   |
| GENE983X  | 18975_g_at | 18975_g_at | 1     | -0.91 | -0.62 | -1.47 | -2.12 | -0.81 | -2    | -     |       |       |   |
| 1.47      | -2.05      | -0.18      | -0.25 | -0.39 | -0.04 | -0.28 | -1.43 | -0.66 | -0.2  | 0.16  | -0.34 | -1.28 | - |
| 0.76      | -0.62      | -0.13      | -0.39 | -0.25 | 0.09  | 0.55  | 0.13  | 0.07  | -0.23 | -0.07 | -0.07 |       |   |
| GENE871X  | 19984_at   | 19984_at   | 1     | -0.76 | -0.71 | -0.86 | -1.02 | -0.59 | -0.55 | -     |       |       |   |
| 1.18      | -1.25      | -0.2       | -0.45 | -0.57 | -0.15 | -0.12 | -0.73 | -0.49 | -0.25 | 0.16  | -0.34 | -0.81 | - |
| 0.2       | -0.86      | -0.62      | 0.01  | 0.11  | 0.23  | -0.28 | -0.04 | 0.08  | -0.53 | 0.04  | 0.01  |       |   |
| GENE870X  | 19882_at   | 19882_at   | 1     | -0.94 | -1.55 | -2    | -2.47 | -1.15 | -1.43 | -     |       |       |   |
| 2.83      | -2.83      | -0.76      | -0.51 | -1.15 | -0.57 | -0.64 | -2.05 | -1    | -0.21 | -0.86 | -1.05 | -1.78 | - |
| 0.47      | -0.1       | -1         | 0.34  | 0.26  | 0.48  | -0.53 | -0.73 | 0.13  | -0.12 | -0.49 | -0.07 |       |   |
| GENE962X  | 14469_at   | 14469_at   | 1     | -1.51 | -1.59 | -2.32 | -2    | -1.64 | -1.94 | -2    |       |       |   |
|           | -2.64      | -0.62      | -0.41 | -0.37 | -0.97 | -0.81 | -1.88 | -0.83 | -0.47 | -0.32 | -0.41 | -0.91 | - |
| 0.41      | -0.08      | -1.15      | 0.34  | 0.68  | 0.55  | 0.28  | 0.68  | 0.28  | 0     | 0.04  | 0.05  |       |   |
| GENE961X  | 12515_at   | 12515_at   | 1     | -1.28 | -0.94 | -1.94 | -1.25 | -1.69 | -0.88 | -     |       |       |   |
| 1.78      | -2.12      | -0.83      | -0.47 | -0.49 | -0.66 | -0.64 | -1.32 | -0.39 | -0.05 | -0.43 | -0.94 | -0.39 | - |
|           | 0.09       | 0.05       | -0.59 | -0.2  | -0.18 | -0.04 | 0.04  | 0.54  | 0.11  | 0     | 0.13  | 0.04  |   |
| GENE957X  | 19382_at   | 19382_at   | 1     | -1.32 | -1.21 | -1.51 | -1.59 | -1.73 | -1.55 | -     |       |       |   |
| 1.78      | -2.25      | -0.59      | -1.21 | -0.78 | -0.83 | -0.83 | -1.59 | -0.91 | -0.41 | -0.05 | -0.83 | -0.59 | - |
| 0.23      | -0.05      | -0.25      | -0.32 | -0.41 | 0     | 0.02  | -0.16 | -0.05 | -0.07 | 0.04  | 0.08  |       |   |
| GENE956X  | 12791_r_at | 12791_r_at | 1     | -1.12 | -1.94 | -1.32 | -1.73 | -1.64 | -1.69 | -     |       |       |   |
| 1.94      | -1.59      | -0.45      | -0.53 | -0.76 | -0.66 | -0.71 | -1.64 | -0.73 | -0.45 | -0.16 | -0.81 | -0.68 | - |
| 0.07      | -0.41      | -0.43      | -0.01 | 0.21  | 0.32  | 0.08  | -0.05 | -0.21 | -0.23 | 0.07  | 0.02  |       |   |
| GENE955X  | 12792_s_at | 12792_s_at | 1     | -1.69 | -2.83 | -2.32 | -2.83 | -2    | -2.05 | -     |       |       |   |
| 2.73      | -2.18      | -0.25      | -0.91 | -1.05 | -1.28 | -1.18 | -2.32 | -1.35 | -0.59 | -0.08 | -1.21 | -0.88 | - |
| 0.3       | -0.57      | -0.26      | 0.01  | 0.31  | 0.4   | 0.13  | -0.07 | -0.15 | -0.16 | 0.09  | 0     |       |   |

|           |            |            |       |       |       |       |       |       |       |       |       |       |       |    |
|-----------|------------|------------|-------|-------|-------|-------|-------|-------|-------|-------|-------|-------|-------|----|
| GENE960X  | 12796_s_at | 12796_s_at | 1     | -1.39 | -1.05 | -1.94 | -1.39 | -1.28 | -1.47 | -     |       |       |       |    |
|           | 2.25       | -2.18      | -0.64 | -0.39 | -0.62 | -0.83 | -0.86 | -1.39 | -0.97 | -0.71 | -0.73 | -0.73 | -0.86 | -  |
|           | 0.57       | -0.64      | -0.45 | 0.12  | 0.2   | 0.22  | -0.16 | -0.07 | -0.23 | -0.23 | -0.04 | -0.2  | -     |    |
| GENE959X  | 12774_at   | 12774_at   | 1     | -1.73 | -1.35 | -2.05 | -1.73 | -1.43 | -1.15 | -     |       |       |       |    |
|           | 2.32       | -2.12      | -0.41 | -0.73 | -0.53 | -1.08 | -0.88 | -1.18 | -1.15 | -0.53 | -0.62 | -0.64 | -0.49 | -  |
|           | 0.2        | -0.47      | -0.45 | -0.49 | -0.2  | -0.13 | -0.16 | 0.12  | -0.01 | -0.16 | 0.07  | 0.08  | -     |    |
| GENE958X  | 13628_at   | 13628_at   | 1     | -3.64 | -2.64 | -4.64 | -3.64 | -2.94 | -3.83 | -     |       |       |       |    |
|           | 4.32       | -4.05      | -1    | -1.88 | -1.51 | -2.18 | -1.32 | -3.05 | -2.32 | -1.55 | -1.18 | -1.39 | -1    | -1 |
|           |            | -1.25      | -1.51 | -1.02 | -0.68 | -0.37 | -0.02 | 0.21  | -0.1  | -0.25 | -0.05 | -0.94 | -     |    |
| GENE868X  | 16428_at   | 16428_at   | 1     | -0.91 | -1.28 | -1.64 | -1.35 | -1.25 | -1.05 | -     |       |       |       |    |
|           | 1.88       | -1.59      | -0.53 | -0.49 | -0.55 | -0.78 | -0.94 | -0.81 | -0.49 | -0.25 | -0.64 | -0.53 | -0.47 | -  |
|           | 0.55       | -0.37      | -0.81 | -0.13 | 0.02  | 0.09  | -0.28 | -0.2  | -0.51 | -0.21 | 0.31  | 0.26  | -     |    |
| GENE954X  | 18316_at   | 18316_at   | 1     | -0.91 | -1.02 | -1.28 | -1.05 | -1.64 | -1.39 | -     |       |       |       |    |
|           | 1.69       | -1.94      | -1.18 | -0.94 | -0.64 | -0.51 | -0.51 | -1.35 | -0.78 | -0.3  | -0.05 | -0.35 | -0.49 | -  |
|           |            | 0.27       | 0.51  | -0.97 | 0.07  | 0.18  | -0.18 | -0.16 | 0.17  | 0.28  | 0.18  | -0.62 | -0.18 | -  |
| GENE953X  | 18664_at   | 18664_at   | 1     | -1.88 | -1.64 | -1.88 | -1.39 | -2.73 | -2.73 | -     |       |       |       |    |
|           | 2.55       | -2.64      | -2.94 | -1.55 | -1.47 | -1    | -1.73 | -3.05 | -1.35 | -1.59 | -1.05 | -0.97 | -0.83 | -  |
|           | 0.59       | -0.34      | -2.25 | -0.16 | 0.11  | -0.26 | -0.1  | 0.01  | 0.08  | -0.21 | -0.18 | -0.26 | -     |    |
| GENE419X  | 17994_r_at | 17994_r_at | 1     | -0.81 | -0.57 | -0.55 | -0.76 | -1.02 | -0.91 | -     |       |       |       |    |
|           | 0.73       | -0.91      | -0.37 | -0.05 | -0.28 | -0.3  | -0.41 | -0.59 | -0.28 | -0.28 | -0.35 | -0.39 | -0.2  | -  |
|           | 0.05       | -0.25      | -0.51 | -0.15 | -0.02 | 0.22  | -0.28 | 0.05  | -0.02 | 0.05  | 0.12  | 0.11  | -     |    |
| GENE418X  | 14066_at   | 14066_at   | 1     | -2.12 | -0.91 | -1.08 | -1.55 | -1.94 | -2.55 | -     |       |       |       |    |
|           | 2.39       | -2.47      | -1.21 | -0.83 | -1.02 | -1.28 | -1.32 | -1.83 | -1.08 | -0.83 | -0.86 | -1.25 | -0.97 | -  |
|           | 0.35       | -0.64      | -1.55 | -0.64 | -0.64 | -0.68 | -0.2  | 0.15  | -0.43 | -0.34 | 0.08  | -0.04 | -     |    |
| GENE417X  | 16477_at   | 16477_at   | 1     | -1.59 | -0.55 | -1.39 | -1.55 | -2.25 | -2.55 | -     |       |       |       |    |
|           | 2.47       | -2.25      | -1.12 | -0.73 | -0.71 | -0.94 | -0.97 | -1.88 | -1.02 | -0.57 | -0.57 | -0.57 | -0.49 | -  |
|           | 0.12       | -0.49      | -1.69 | -0.88 | -0.83 | -0.76 | -0.39 | 0.47  | -0.1  | -0.15 | 0.16  | 0.01  | -     |    |
| GENE1095X | 12450_at   | 12450_at   | 1     | -0.94 | -0.28 | -0.73 | -0.28 | -0.37 | -0.41 | -     |       |       |       |    |
|           | 1.64       | -1.32      | -0.51 | -0.23 | -0.43 | -0.28 | -0.57 | -1    | -0.39 | -0.16 | -0.32 | -0.62 | -0.35 | -  |
|           |            | 0.01       | 0.02  | -0.02 | -0.23 | -0.21 | -0.02 | -0.21 | 0.35  | -0.02 | 0.23  | 0.25  | 0.22  | -  |
| GENE470X  | 17966_at   | 17966_at   | 1     | -1    | -1.28 | -1.73 | -0.73 | -0.59 | -0.66 | -     |       |       |       |    |
|           | 1.88       | -1.73      | -0.32 | -0.18 | -0.16 | -0.64 | -0.78 | -1.02 | -1.02 | -0.57 | -1.02 | -0.43 | -0.49 | -  |
|           | 0.15       | -0.23      | -0.47 | 0.22  | 0.09  | 0.18  | 0     | 0.55  | -0.01 | -0.12 | 0.13  | -0.05 | -     |    |
| GENE469X  | 18911_at   | 18911_at   | 1     | -2.47 | -1.83 | -2.73 | -1.73 | -1.47 | -1.28 | -     |       |       |       |    |
|           | 2.83       | -2.94      | -0.15 | -1.43 | -1.18 | -2.18 | -1.73 | -2.47 | -1.39 | -1.43 | -1.28 | -1.08 | -0.04 | -  |
|           |            | 0.01       | 0.57  | 0.11  | -0.1  | -0.08 | -0.41 | 0.05  | 0.85  | 0.16  | -0.02 | 0.01  | -0.32 | -  |
| GENE1208X | 20699_at   | 20699_at   | 1     | -0.91 | -0.97 | -0.64 | -1.08 | -0.12 | 0.48  | -     |       |       |       |    |
|           | 1.21       | -0.37      | 0.05  | -0.47 | -0.66 | -1.55 | -0.97 | -0.88 | -0.39 | -0.64 | -0.25 | -0.39 | -0.39 | -  |
|           | 0.78       | -1.28      | -0.05 | -1    | 0.33  | 0.22  | 0.29  | -1.28 | -0.47 | -0.62 | 0.15  | -0.23 | -     |    |
| GENE1207X | 13172_s_at | 13172_s_at | 1     | -2.18 | -1.59 | -0.83 | -1.28 | -1.02 | 0.56  | -     |       |       |       |    |
|           | 0.88       | 0.4        | -0.68 | -1.02 | -0.34 | -1.18 | -1    | -0.62 | -0.15 | -1.28 | -1.35 | -0.02 | 0.5   | -  |
|           | 0.51       | -0.94      | -0.3  | -1    | -0.62 | -1.15 | 0.16  | -0.81 | -0.66 | -0.43 | -0.71 | -0.91 | -     |    |
| GENE1206X | 17880_s_at | 17880_s_at | 1     | -1.88 | -1.32 | -1.12 | -1.21 | -1.15 | 0.33  | -     |       |       |       |    |
|           | 0.78       | 0.18       | -0.41 | -0.94 | -0.66 | -1.08 | -0.97 | -0.68 | -0.57 | -1    | -1.12 | -0.04 | 0.5   | -  |
|           | 0.39       | -0.55      | -0.59 | -0.83 | -0.64 | -0.71 | -0.37 | -0.59 | -0.68 | -0.39 | -0.21 | -0.43 | -     |    |
| GENE1022X | 14492_s_at | 14492_s_at | 1     | -1.47 | -0.64 | 0.21  | -1.28 | -0.45 | -0.51 | -     |       |       |       |    |
|           | 0.47       | -0.78      | -0.57 | -0.66 | -0.97 | -1.59 | -1.35 | -1.28 | -0.66 | -0.97 | -1.02 | -0.83 | -0.25 | -  |
|           | 0.83       | -1.25      | -0.02 | -0.83 | -0.37 | -0.34 | 0.74  | -0.1  | -0.78 | -1.08 | -0.13 | -0.88 | -     |    |
| GENE1021X | 16453_s_at | 16453_s_at | 1     | -1.59 | -0.41 | 0.46  | -0.35 | -1.51 | -0.62 | -     |       |       |       |    |
|           | 0.12       | -0.71      | -0.86 | -0.78 | -0.55 | -0.73 | -0.76 | -1.05 | -0.32 | -0.71 | -1.59 | -0.39 | -0.26 | -  |
|           | 0.83       | -1.25      | -0.01 | -0.55 | -0.12 | -0.12 | 0.22  | -0.13 | -0.94 | -1.25 | -0.64 | -1.59 | -     |    |
| GENE946X  | 18754_at   | 18754_at   | 1     | -0.45 | -0.32 | -0.34 | -0.78 | -0.94 | -0.12 | -     |       |       |       |    |
|           | 0.62       | -0.83      | -0.51 | -0.83 | -0.15 | -0.59 | -0.41 | -0.62 | -0.64 | -0.13 | -0.34 | -0.07 | -0.15 | -  |
|           | 0.23       | -0.57      | -0.18 | -1.12 | -0.73 | -0.37 | -0.47 | 0.26  | -0.07 | 0.05  | -0.26 | 0.02  | -     |    |
| GENE945X  | 14096_at   | 14096_at   | 1     | -0.41 | -0.66 | -1.78 | -1.55 | -1.73 | -0.71 | -     |       |       |       |    |
|           | 1.32       | -1.12      | -0.49 | -0.66 | -0.86 | -1.21 | -1.32 | -0.83 | -1.78 | -0.78 | -0.25 | -1.08 | 0.25  | -  |
|           | 0.73       | -0.86      | -1    | -2.39 | -2.25 | -0.83 | -0.73 | -0.15 | -0.02 | 0.5   | -0.83 | 0.22  | -     |    |

|           |            |            |       |       |       |       |       |       |       |       |       |       |       |   |
|-----------|------------|------------|-------|-------|-------|-------|-------|-------|-------|-------|-------|-------|-------|---|
| GENE944X  | 16184_at   | 16184_at   | 1     | -0.88 | -1.55 | -1.18 | -1.28 | -1.94 | -0.64 | -     |       |       |       |   |
|           | 1.55       | -0.3       | -1.47 | -0.88 | -0.47 | -1.59 | -1.12 | -0.37 | -0.55 | -0.2  | -0.2  | -0.18 | -0.2  | - |
|           | 0.94       | -0.86      | -1.32 | -1.08 | -0.62 | -0.47 | -1.35 | 0.28  | -0.3  | -0.23 | -0.13 | -0.1  | -     |   |
| GENE943X  | 14899_at   | 14899_at   | 1     | -0.45 | 0.26  | -0.97 | 0     | -1.59 | -0.88 | -     |       |       |       |   |
|           | 0.51       | -1.15      | -1    | -0.94 | -0.34 | -2.47 | -0.34 | -0.91 | -0.78 | -0.55 | -0.23 | -0.18 | -0.13 | - |
|           | 0.12       | -0.02      | -0.55 | -1.02 | -1.08 | -0.83 | -0.73 | 0.33  | 0.09  | 0.2   | -0.02 | 0.01  | -     |   |
| GENE1082X | 13155_i_at | 13155_i_at | 1     | 0.16  | -0.2  | -0.15 | -0.07 | -0.55 | -0.3  | -     |       |       |       |   |
|           | 0.91       | -0.86      | -0.62 | -0.88 | -0.71 | -0.81 | -0.86 | -1.05 | -0.59 | -0.25 | -0.43 | -0.23 | 0.29  | - |
|           | 0.55       | -0.39      | -0.32 | -0.16 | -0.34 | -0.2  | 0.07  | 0.12  | -0.05 | -0.28 | -0.02 | 0     | -     |   |
| GENE1081X | 13192_at   | 13192_at   | 1     | 0.84  | -1.32 | -1.18 | -0.32 | -2.12 | -2.32 | -     |       |       |       |   |
|           | 3.83       | -2.47      | -2.12 | -1.43 | -2.55 | -2.47 | -1.32 | -3.83 | -1.05 | 0.26  | 0     | -1.43 | -0.97 | - |
|           | 0.37       | -1.35      | -2.32 | -1.25 | -0.97 | -1.25 | -1.39 | -1.08 | -1.18 | -1.55 | -0.43 | -0.23 | -     |   |
| GENE1080X | 17525_at   | 17525_at   | 1     | 0.58  | -0.45 | -1.64 | -0.49 | -2.18 | -1.69 | -     |       |       |       |   |
|           | 3.64       | -3.64      | -2.18 | -2.64 | -2.12 | -1.69 | -1.69 | -3.64 | -0.97 | 0.16  | -0.2  | -2.47 | -1.55 | - |
|           | 0.86       | -1.94      | -1.69 | 0.11  | -0.34 | -0.2  | -1.25 | -1.39 | -1.83 | -1.94 | -0.34 | -0.97 | -     |   |
| GENE1056X | 17409_at   | 17409_at   | 1     | -0.18 | 0.59  | -0.35 | -0.94 | -0.83 | -0.73 | -     |       |       |       |   |
|           | 0.25       | -0.34      | -0.55 | -1.28 | -1.78 | -1.32 | -1.25 | -1.35 | -1.21 | -0.59 | -0.59 | -0.97 | -0.16 | - |
|           | 0.2        | -0.43      | -0.62 | 0     | 0.07  | 0.12  | 0.15  | 0     | -0.45 | -0.53 | -0.04 | -0.39 | -     |   |
| GENE1055X | 12993_s_at | 12993_s_at | 1     | -0.3  | 0.02  | -0.35 | -1.18 | -0.88 | -1.02 | -     |       |       |       |   |
|           | 0.88       | -1.18      | -1.08 | -2.05 | -1.15 | -1.83 | -1.05 | -1.18 | -0.91 | -0.64 | -0.88 | -1.32 | -0.37 | - |
|           | 0.73       | -0.35      | -0.59 | -1.12 | -0.73 | -0.34 | -0.28 | -0.55 | -0.21 | -0.21 | -0.37 | -0.18 | -     |   |
| GENE1054X | 13027_at   | 13027_at   | 1     | -0.57 | -0.15 | -0.41 | -0.64 | -1    | -1.47 | -     |       |       |       |   |
|           | 0.86       | -1.12      | -1.21 | -1.39 | -1.12 | -0.62 | -0.68 | -1.59 | -1.32 | -0.45 | -0.35 | -0.73 | -0.41 | - |
|           | 0.37       | -0.62      | -0.76 | -0.1  | 0.11  | 0     | -0.34 | -0.02 | -0.41 | -0.41 | 0.05  | 0.08  | -     |   |
| GENE1053X | 17938_at   | 17938_at   | 1     | -0.25 | -0.13 | -0.71 | -1.28 | -1.12 | -1.12 | -1    |       |       |       |   |
|           |            | -0.68      | -0.76 | -1.32 | -1.47 | -1.47 | -1.47 | -1.51 | -1.25 | -0.41 | -0.66 | -1.05 | -0.57 | - |
|           | 0.04       | -0.94      | -0.73 | -0.45 | -0.21 | 0.02  | -0.43 | -0.62 | -0.62 | -0.76 | 0.02  | -0.26 | -     |   |
| GENE1052X | 16921_at   | 16921_at   | 1     | -0.88 | 0.21  | -1.05 | -1.55 | -1.51 | -1.39 | -     |       |       |       |   |
|           | 1.12       | -0.97      | -0.78 | -0.88 | -1.15 | -0.66 | -0.88 | -1.43 | -0.86 | -0.51 | -1    | -1    | -0.62 | - |
|           | 0.16       | -0.91      | -1.05 | -0.59 | -0.53 | -0.21 | -0.47 | -0.16 | -0.76 | -0.73 | 0.05  | -0.07 | -     |   |
| GENE1043X | 17944_at   | 17944_at   | 1     | -1.15 | -0.76 | -0.91 | -0.3  | -1.28 | -0.86 | -     |       |       |       |   |
|           | 1.05       | -0.91      | -0.59 | -1.08 | -0.15 | -1.32 | -1.28 | -1.39 | -1.12 | -1.05 | -0.59 | 0.21  | 0.47  | - |
|           | 0.41       | -1.05      | -0.53 | -0.45 | -0.05 | -0.05 | -0.71 | -0.3  | -0.53 | -0.62 | -0.34 | -0.41 | -     |   |
| GENE1042X | 20018_at   | 20018_at   | 1     | -0.43 | -0.88 | -0.51 | -0.57 | -0.68 | -0.76 | -     |       |       |       |   |
|           | 0.78       | -1.28      | -0.68 | -0.55 | -0.71 | -0.57 | -0.73 | -1.02 | -0.91 | -0.45 | -0.05 | -0.47 | 0.35  | - |
|           |            | 0.37       | 0.02  | -0.53 | 0     | 0.07  | -0.32 | -0.49 | -0.2  | -0.43 | -0.62 | 0.29  | 0.21  | - |
| GENE1041X | 16513_at   | 16513_at   | 1     | -0.59 | -0.34 | -0.83 | -1.02 | -1.12 | -0.64 | -     |       |       |       |   |
|           | 1.64       | -1.69      | -0.57 | -1.15 | -1.02 | -1    | -0.78 | -1.88 | -1.35 | -0.39 | -0.21 | -0.62 | 0.13  | - |
|           |            | 0.17       | -0.08 | -0.53 | -0.37 | -0.34 | -0.62 | -0.62 | 0.42  | -0.26 | -0.15 | -0.16 | 0.08  | - |
| GENE1040X | 19211_at   | 19211_at   | 1     | -1.25 | -0.94 | -0.97 | -0.94 | -1.47 | -2.18 | -     |       |       |       |   |
|           | 2.05       | -2.18      | -0.78 | -1.47 | -0.91 | -1.39 | -1.25 | -2.64 | -1.18 | -0.62 | -0.86 | -0.73 | -0.55 | - |
|           |            | 0.07       | 0.04  | -1.08 | 0.07  | -0.08 | -0.08 | -0.28 | 0.09  | -0.32 | -0.28 | -0.15 | -0.3  | - |
| GENE1039X | 19063_at   | 19063_at   | 1     | -3.18 | -1.05 | -2.39 | -4.05 | -3.32 | -3.83 | -     |       |       |       |   |
|           | 4.64       | -4.64      | -1.43 | -3.47 | -3.32 | -2.32 | -3.05 | -4.32 | -2.25 | -2.94 | -2    | -2.55 | -1.64 | - |
|           |            | 0.18       | -0.86 | -2.32 | -1.12 | -0.53 | -0.71 | -1.39 | 0.92  | -0.41 | -1.51 | 0.18  | -0.35 | - |
| GENE446X  | 15083_at   | 15083_at   | 1     | -1.05 | -0.18 | -0.3  | -0.49 | -0.2  | -1.18 | -     |       |       |       |   |
|           | 0.81       | -1.25      | -0.81 | -1.12 | -0.73 | -0.91 | -1.05 | -1.02 | -0.73 | -1.02 | -0.88 | -1    | -0.83 | - |
|           | 0.39       | -0.49      | -0.66 | -0.07 | -0.26 | 0.09  | 0     | -0.12 | -0.25 | -0.1  | -0.16 | -0.16 | -     |   |
| GENE445X  | 16975_at   | 16975_at   | 1     | -1.69 | -0.43 | -0.71 | -1.55 | -0.76 | -1.18 | -     |       |       |       |   |
|           | 1.35       | -1.73      | -0.83 | -1.25 | -1.51 | -1.43 | -1.55 | -2.25 | -1.05 | -1.18 | -1.18 | -1.08 | -0.37 | - |
|           | 0.45       | -1.08      | -0.12 | -0.57 | -0.43 | -0.25 | 0.4   | -0.13 | -0.62 | -0.68 | -0.2  | -0.51 | -     |   |
| GENE444X  | 15534_f_at | 15534_f_at | 1     | -1.35 | -0.23 | -1.35 | -1.73 | -1.02 | -1.39 | -     |       |       |       |   |
|           | 1.05       | -1.28      | -0.71 | -1.25 | -1.32 | -1.18 | -1.47 | -1.73 | -1.51 | -1    | -0.71 | -1.28 | -0.68 | - |
|           |            | 0.01       | -1.25 | -0.51 | -0.41 | -0.16 | -0.28 | 0.12  | -0.15 | -0.41 | -0.37 | -0.01 | -0.1  | - |
| GENE443X  | 14072_at   | 14072_at   | 1     | -1.32 | -0.91 | -0.59 | -1.43 | -1.32 | -1.32 | -     |       |       |       |   |
|           | 1.12       | -1.59      | -0.91 | -1.88 | -1.15 | -1    | -1    | -1.35 | -1.47 | -0.81 | -0.78 | -0.91 | -0.57 | - |
|           | 0.81       | -0.76      | -0.28 | -0.57 | -0.47 | -0.08 | -0.25 | 0.08  | -0.15 | -0.26 | -0.18 | -0.34 | -     |   |



|           |            |            |       |       |       |       |       |       |       |       |       |       |    |
|-----------|------------|------------|-------|-------|-------|-------|-------|-------|-------|-------|-------|-------|----|
| GENE442X  | 16101_s_at | 16101_s_at | 1     | -2.39 | -1.05 | -0.78 | -1.47 | -0.73 | -1.59 | -     |       |       |    |
| 1.25      | -1.78      | -0.57      | -1.21 | -1.05 | -1.32 | -1.21 | -1.83 | -1.39 | -0.97 | -0.68 | -1.08 | -0.73 | -  |
| 1.02      | -0.86      | -0.18      | -0.76 | -0.62 | -0.23 | 0     | 0.35  | 0.16  | 0.04  | -0.2  | -0.34 |       |    |
| GENE441X  | 15737_at   | 15737_at   | 1     | -4.05 | -3.47 | -3.32 | -3.64 | -3.18 | -3.47 | -     |       |       |    |
| 3.47      | -3.47      | -1.88      | -2.25 | -2.39 | -2.73 | -2.83 | -4.05 | -2.94 | -3.05 | -1.73 | -2.55 | -2.55 | -  |
| 1.94      | -1.39      | -1         | -1.39 | -1.43 | -0.64 | -0.81 | -0.57 | 0.43  | 0.04  | -1.28 | -1.55 |       |    |
| GENE440X  | 16014_at   | 16014_at   | 1     | -2.64 | -1.25 | -1.43 | -1.08 | -1.43 | -1.73 | -     |       |       |    |
| 1.28      | -1.83      | -1.02      | -1.83 | -1.25 | -1.47 | -1.02 | -1.78 | -1.73 | -1.78 | -2.25 | -1.18 | -0.83 | -  |
| 0.88      | -0.83      | -1.02      | -0.66 | -0.51 | -0.25 | -0.88 | -0.34 | -0.62 | -0.62 | -1.25 | -0.66 |       |    |
| GENE439X  | 18637_at   | 18637_at   | 1     | -2.55 | -3.32 | -2.47 | -3.32 | -2.47 | -2.47 | -     |       |       |    |
| 4.32      | -3.83      | -2.25      | -3.47 | -2.12 | -3.32 | -3.05 | -4.32 | -3.47 | -2.83 | -2.83 | -3.32 | -0.94 | -  |
| 1.78      | -0.68      | -0.83      | -0.91 | 0     | -0.05 | 0.36  | 0.13  | 0.59  | -0.21 | 0.04  | -1.28 |       |    |
| GENE438X  | 15111_s_at | 15111_s_at | 1     | -2.12 | -2.18 | -2.47 | -2.25 | -2.47 | -2.83 | -     |       |       |    |
| 3.47      | -3.47      | -0.91      | -1.69 | -1.64 | -1.78 | -1.69 | -3.05 | -1.55 | -1.69 | -2    | -1.39 | -0.59 | -  |
| 1.47      | -0.86      | -1.39      | -0.66 | -0.45 | -0.37 | -0.12 | -0.35 | -0.49 | -0.91 | -0.32 | -0.83 |       |    |
| GENE437X  | 16438_at   | 16438_at   | 1     | -4.32 | -5.05 | -3.83 | -3.83 | -2.64 | -2.83 | -     |       |       |    |
| 5.64      | -5.05      | -1.64      | -3.32 | -3.18 | -2.73 | -2.64 | -5.64 | -1.78 | -3.64 | -3.83 | -2.94 | -1.73 | -  |
| 1.88      | -1.43      | -1.35      | -0.71 | -0.53 | -0.21 | 0.57  | -0.73 | -0.83 | -1.32 | -0.55 | -1.64 |       |    |
| GENE434X  | 17475_at   | 17475_at   | 1     | -1.35 | -0.73 | -0.32 | -0.83 | -1.32 | -1.21 | -     |       |       |    |
| 0.94      | -1.39      | -1         | -0.62 | -0.94 | -1.15 | -0.81 | -1.83 | -0.49 | -0.45 | -0.71 | -0.39 | -0.25 | -  |
| 0.45      | -0.97      | -0.51      | -0.71 | -0.91 | -0.59 | -0.21 | 0.07  | -0.18 | -0.1  | -0.12 | -0.41 |       |    |
| GENE433X  | 12300_at   | 12300_at   | 1     | -2.12 | -1.15 | -0.51 | -1.35 | -1.32 | -2.64 | -1    |       |       |    |
|           | -2.12      | -1.51      | -1.21 | -1.64 | -1.35 | -1.39 | -2.83 | -1.21 | -1.73 | -1.28 | -1.59 | -1.32 | -  |
| 0.73      | -0.83      | -1.64      | -1.12 | -1.12 | -0.78 | -0.41 | -0.41 | -0.41 | -0.26 | -0.26 | -0.35 |       |    |
| GENE432X  | 17937_at   | 17937_at   | 1     | -0.62 | -0.88 | -0.35 | -0.71 | -0.81 | -1.08 | -     |       |       |    |
| 0.78      | -1.59      | -0.47      | -0.81 | -0.66 | -0.81 | -0.76 | -1.35 | -0.81 | -0.25 | -0.64 | -0.57 | -0.62 | -  |
| 0.37      | -0.34      | -0.39      | -0.13 | -0.15 | -0.49 | -0.47 | -0.37 | -0.2  | -0.39 | -0.32 | -0.04 |       |    |
| GENE431X  | 19467_at   | 19467_at   | 1     | -2    | -1.88 | -0.94 | -1.94 | -1.28 | -2.55 | -     |       |       |    |
| 2.64      | -4.05      | -0.94      | -1.94 | -1.47 | -1.15 | -1.28 | -4.05 | -1.83 | -1    | -1.32 | -1.78 | -0.73 | -  |
| 1.35      | -1.12      | -0.32      | -1.08 | -1    | -0.71 | -0.04 | -0.43 | -0.47 | -0.55 | -0.05 | -0.73 |       |    |
| GENE425X  | 14519_at   | 14519_at   | 1     | -2.32 | -1.32 | -0.88 | -1.47 | -0.88 | -1.69 | -1    |       |       |    |
|           | -1.47      | -0.66      | -0.81 | -0.76 | -1.15 | -1.47 | -1.32 | -1.35 | -0.37 | -0.51 | -1.32 | -1.25 | -  |
| 0.25      | -0.83      | -0.78      | -0.28 | -0.12 | -0.25 | -0.23 | -0.07 | -0.05 | -0.16 | -0.02 | 0.44  |       |    |
| GENE424X  | 20117_at   | 20117_at   | 1     | -1.64 | -2    | -0.39 | -1.83 | -1.51 | -2.32 | -     |       |       |    |
| 1.43      | -2.47      | -1.12      | -1.35 | -0.97 | -1.73 | -1.73 | -2.18 | -1.64 | -0.62 | -0.15 | -1.25 | -0.55 | -  |
| 0.34      | -1.47      | -0.94      | -0.73 | -0.21 | 0.15  | 0.17  | 0.46  | 0.01  | -0.16 | 0.38  | 0.34  |       |    |
| GENE1051X | 17873_s_at | 17873_s_at | 1     | -1.25 | -0.28 | -1.32 | -0.81 | -0.86 | -0.94 | -     |       |       |    |
| 0.2       | -1.47      | -0.51      | -1.39 | -0.73 | -0.62 | -0.73 | -0.78 | -1.02 | -0.49 | -0.68 | -0.73 | 0.11  | -  |
| 0.18      | 0.02       | -0.12      | 0.15  | -0.39 | 0.02  | -1.18 | -0.08 | -0.45 | 0.27  | -0.26 | 0.09  |       |    |
| GENE1050X | 17549_at   | 17549_at   | 1     | -2.18 | -0.73 | -3.05 | -2.83 | -1    | -2.83 | -     |       |       |    |
| 2.32      | -1.05      | -1.39      | -3.05 | -2.83 | -3.05 | -1.88 | -1.83 | -0.91 | -2.18 | -2.47 | -0.57 | -0.45 | -  |
| 0.88      | -1         | -0.86      | -1.43 | -3.64 | -0.78 | -2.39 | -0.53 | 0.13  | 0.58  | -1    | -0.12 |       |    |
| GENE1049X | 18029_g_at | 18029_g_at | 1     | -0.49 | -0.68 | -1.43 | -1.43 | -1.12 | -1.25 | -1    |       |       |    |
|           | -0.59      | -0.83      | -3.32 | -1.21 | -1.43 | -0.25 | -0.71 | -1.08 | -0.49 | 0.08  | -0.88 | -0.83 | -  |
| 0.76      | -0.68      | -1         | -0.2  | -0.62 | -0.37 | -0.76 | -0.28 | 0.16  | 0.09  | -0.43 | -0.49 |       |    |
| GENE1048X | 14111_s_at | 14111_s_at | 1     | -0.51 | -1.05 | -3.64 | -3.83 | -1.51 | -0.35 | -     |       |       |    |
| 0.76      | -0.45      | -0.68      | -3.18 | -1.73 | -1.73 | -1.64 | -0.53 | -2.73 | -1.08 | -1    | -1.47 | -0.53 | -  |
| 1.12      | -1.69      | -0.88      | -0.91 | -1.05 | -0.37 | -0.88 | -0.07 | -0.32 | -0.39 | -0.59 | -0.25 |       |    |
| GENE1059X | 14067_at   | 14067_at   | 1     | -1.02 | -1.73 | -1.21 | -0.76 | -1.05 | -0.71 | -     |       |       |    |
| 1.12      | -1.28      | -1.05      | -1.94 | -1.39 | -1.51 | -1.59 | -1.05 | -2.12 | -0.83 | -0.86 | -1.08 | 0.09  | -1 |
|           | -0.94      | -0.02      | -1.25 | -0.57 | -0.55 | -0.01 | -0.1  | -1.05 | -0.47 | -0.15 | -0.04 |       |    |
| GENE339X  | 17660_at   | 17660_at   | 1     | -2.12 | -2.25 | -2.73 | -2.94 | -1.15 | -1    | -     |       |       |    |
| 2.55      | -1.69      | -0.62      | -2.73 | -1.51 | -1.43 | -2.94 | -1.28 | -2.05 | -0.57 | -1.28 | -1.64 | -1.21 | -  |
| 0.81      | -1.59      | 0.37       | -1.51 | -0.94 | -1.21 | -1.32 | -0.88 | -0.88 | -0.53 | -0.41 | -0.05 |       |    |
| GENE1186X | 14995_at   | 14995_at   | 1     | -2.05 | -0.66 | -0.73 | -1.51 | -0.91 | -0.88 | -     |       |       |    |
| 0.21      | -0.64      | -0.16      | -0.73 | -0.32 | -0.94 | -0.88 | -0.71 | -1.21 | -0.45 | -1.21 | -0.66 | -0.71 | -  |
| 1.39      | -1.12      | -0.53      | -1.08 | -1.18 | -0.91 | -0.04 | -0.2  | -0.18 | -0.2  | 0.35  | 0.08  |       |    |

|           |            |            |       |       |       |       |       |       |       |       |       |       |       |    |
|-----------|------------|------------|-------|-------|-------|-------|-------|-------|-------|-------|-------|-------|-------|----|
| GENE1185X | 14045_at   | 14045_at   | 1     | -2.18 | -1.35 | -1.18 | -1.35 | -1.21 | -0.94 | -     |       |       |       |    |
|           | 1.12       | -1.28      | -0.34 | -0.78 | -0.15 | -1    | -0.83 | -0.86 | -0.73 | -0.57 | -0.78 | -0.23 | -0.86 | -  |
|           | 1.64       | -1.69      | -0.66 | -1.32 | -1.08 | -0.59 | -0.08 | -0.07 | -0.15 | -0.04 | -0.04 | -0.04 | -     |    |
| GENE357X  | 16172_at   | 16172_at   | 1     | -2    | -1.69 | -1.21 | -1.69 | -1.12 | -1.83 | -     |       |       |       |    |
|           | 0.73       | -1.78      | -0.66 | -1.73 | -0.55 | -1.21 | -1.47 | -0.64 | -1.35 | -0.86 | -0.78 | -0.76 | -1.02 | -1 |
|           |            | -1.21      | -0.55 | -1.69 | -1.59 | -0.81 | -0.55 | -0.21 | 0.05  | 0.26  | -0.66 | -0.25 | -     |    |
| GENE356X  | 17294_at   | 17294_at   | 1     | -1.47 | -1.43 | -1.21 | -1.43 | -1.32 | -1.83 | -     |       |       |       |    |
|           | 1.32       | -1.64      | -1.18 | -1.51 | -1.08 | -1.05 | -1.05 | -1.02 | -1.21 | -0.43 | -0.76 | -0.68 | -0.68 | -  |
|           | 0.71       | -0.86      | -0.88 | -1.59 | -1    | -0.53 | -0.28 | -0.15 | -0.32 | -0.62 | -0.39 | -0.28 | -     |    |
| GENE355X  | 18800_at   | 18800_at   | 1     | -3.32 | -1.35 | -1.94 | -2.32 | -1.83 | -2.55 | -2    |       |       |       |    |
|           | -2.18      | -1.55      | -1.21 | -0.88 | -1.39 | -1.15 | -1.73 | -1.21 | -0.73 | -0.73 | -1.21 | -1.59 | -     |    |
|           | 1.59       | -1.18      | -1.05 | -2    | -1.83 | -1.59 | -1.15 | -0.64 | -0.43 | -0.68 | -0.88 | -0.71 | -     |    |
| GENE354X  | 18222_at   | 18222_at   | 1     | -2.47 | -1.39 | -1.47 | -1.69 | -1.39 | -2.12 | -1    |       |       |       |    |
|           | -1.59      | -1.47      | -1.21 | -1.51 | -1.35 | -1.47 | -1.12 | -1.64 | -1.78 | -1.64 | -1.51 | -1.15 | -1    |    |
|           | -1.64      | -1.08      | -1.15 | -1.35 | -0.86 | -0.73 | -0.04 | -0.55 | -0.47 | -0.37 | -0.3  | -     |       |    |
| GENE353X  | 13635_at   | 13635_at   | 1     | -2    | -1.59 | -2.83 | -1.43 | -1.64 | -1.88 | -     |       |       |       |    |
|           | 1.35       | -1.18      | -1.32 | -2    | -1.51 | -1.69 | -1.73 | -1.83 | -2    | -1.94 | -1.43 | -1.35 | -0.62 | -  |
|           | 0.88       | -1.94      | -1.12 | -2.05 | -1.83 | -1.21 | -0.41 | -0.59 | -0.51 | -0.53 | -0.12 | -0.78 | -     |    |
| GENE447X  | 12477_at   | 12477_at   | 1     | -1.25 | -0.41 | -0.62 | -0.86 | -0.37 | -0.62 | -     |       |       |       |    |
|           | 0.55       | -1.15      | -0.41 | -0.73 | 0.01  | -0.21 | -0.78 | -0.71 | -1.08 | -0.62 | -0.55 | -0.32 | -0.34 | -  |
|           | 0.64       | -0.78      | -0.41 | -0.73 | -0.39 | 0     | 0.51  | 0.08  | -0.26 | 0.17  | -0.81 | -0.25 | -     |    |
| GENE474X  | 13609_at   | 13609_at   | 1     | -1.47 | -1.94 | -0.45 | -1.21 | -0.94 | -0.51 | -     |       |       |       |    |
|           | 1.08       | -1.35      | -0.08 | -0.3  | -0.73 | -1.35 | -1.05 | -0.91 | -0.53 | -0.49 | -0.51 | -0.62 | -0.21 | -  |
|           | 0.64       | -0.68      | -0.23 | -0.51 | -0.47 | -0.45 | 0.12  | 0.31  | -0.16 | -0.57 | 0.52  | -0.39 | -     |    |
| GENE465X  | 13111_at   | 13111_at   | 1     | -2.55 | -1.43 | -1.94 | -1.78 | -0.76 | -0.41 | -     |       |       |       |    |
|           | 1.59       | -1.51      | 0.2   | -0.88 | 0.12  | -1.21 | -1.32 | -0.86 | -1.05 | -0.73 | -1    | 0.09  | -0.05 | -  |
|           | 0.88       | -0.64      | 0.12  | -0.83 | -0.53 | -0.51 | 0.11  | -0.04 | -0.32 | -0.18 | -0.34 | -0.86 | -     |    |
| GENE464X  | 14727_s_at | 14727_s_at | 1     | -1.83 | -1.43 | -1.51 | -1.02 | -1    | -0.43 | -     |       |       |       |    |
|           | 1.69       | -1.12      | -0.05 | -0.43 | -0.23 | -0.59 | -0.97 | -0.83 | -0.59 | -0.32 | -0.81 | -0.13 | -0.04 | -  |
|           | 0.78       | -0.59      | -0.1  | -0.78 | -0.83 | -0.37 | -0.68 | 0     | -0.45 | -0.05 | -0.13 | -0.12 | -     |    |
| GENE860X  | 16899_at   | 16899_at   | 1     | -1.78 | -2    | -2.73 | -2.73 | -1.64 | -1.59 | -     |       |       |       |    |
|           | 2.25       | -2.18      | 0.13  | -0.64 | -0.57 | -0.78 | -0.81 | -1.15 | -0.83 | -0.49 | -0.32 | -0.57 | -1.05 | -  |
|           | 0.41       | -0.68      | -0.35 | -0.51 | -0.28 | 0.11  | -0.37 | 0.04  | -0.05 | 0.08  | -0.16 | -0.2  | -     |    |
| GENE859X  | 17957_at   | 17957_at   | 1     | -3.32 | -5.05 | -4.32 | -5.64 | -3.32 | -3.32 | -     |       |       |       |    |
|           | 3.83       | -4.05      | -0.78 | -2.18 | -0.64 | -1.78 | -1.64 | -2.39 | -2.32 | -0.62 | -0.43 | -0.97 | -1.18 | -  |
|           | 0.86       | -1.88      | -0.41 | -1.12 | -0.81 | 0.08  | -0.1  | -0.73 | -0.28 | -0.21 | -0.39 | -0.32 | -     |    |
| GENE343X  | 13587_at   | 13587_at   | 1     | -3.05 | -3.83 | -4.64 | -4.64 | -1.83 | -1.69 | -     |       |       |       |    |
|           | 4.05       | -4.05      | -0.16 | -2.39 | -1.28 | -1.73 | -2.32 | -3.47 | -2.64 | -1.51 | -1.28 | -1.78 | -2    | -  |
|           | 0.51       | -1.43      | -0.66 | -0.91 | -0.57 | -0.57 | -0.26 | -0.53 | -0.59 | -0.51 | -0.18 | -0.43 | -     |    |
| GENE472X  | 14051_at   | 14051_at   | 1     | -1.55 | -1.28 | -1.25 | -1.18 | -0.86 | -0.91 | -     |       |       |       |    |
|           | 1.18       | -1.83      | 0.41  | -0.88 | -0.18 | -0.62 | -0.51 | -0.81 | -1.15 | -0.34 | -0.37 | -0.37 | -0.57 | -  |
|           | 0.1        | -0.45      | -0.28 | -0.23 | -0.01 | -0.12 | 0.11  | -0.01 | -0.16 | -0.16 | -0.02 | -0.25 | -     |    |
| GENE471X  | 20284_at   | 20284_at   | 1     | -1.94 | -1.59 | -2.55 | -2.18 | -1.25 | -0.97 | -     |       |       |       |    |
|           | 2.25       | -2.39      | 0.09  | -0.71 | -0.01 | -1.12 | -0.81 | -0.88 | -1.73 | -0.53 | -0.62 | -0.21 | -0.26 | -  |
|           | 0.32       | -0.43      | -0.23 | -0.39 | -0.08 | -0.13 | 0.01  | 0.37  | -0.21 | -0.21 | 0.07  | -0.07 | -     |    |
| GENE468X  | 13143_at   | 13143_at   | 1     | -2.18 | -1.73 | -1.59 | -2.18 | -0.68 | -1.05 | -     |       |       |       |    |
|           | 1.12       | -1.47      | -0.47 | -1.28 | -1.05 | -1.47 | -1.55 | -1.12 | -1.43 | -0.86 | -0.53 | -1.02 | -0.55 | -  |
|           | 0.41       | -0.68      | 0.01  | -0.28 | -0.1  | -0.04 | 0.43  | -0.21 | -0.21 | -0.37 | -0.04 | -0.47 | -     |    |
| GENE467X  | 15219_at   | 15219_at   | 1     | -3.83 | -2.32 | -3.64 | -4.05 | -1.32 | -2.47 | -     |       |       |       |    |
|           | 3.83       | -2.73      | 0.15  | -2    | -1.05 | -1.43 | -1.35 | -1.83 | -1.64 | -0.91 | -0.86 | -1.64 | -2    | -  |
|           | 0.91       | -1.78      | -0.37 | -0.66 | -0.26 | 0.44  | -0.34 | -0.41 | 0.12  | -0.02 | -0.68 | -0.57 | -     |    |
| GENE466X  | 12171_at   | 12171_at   | 1     | -2.47 | -1.55 | -2.47 | -2.47 | -1.73 | -1.43 | -     |       |       |       |    |
|           | 2.39       | -1.39      | -0.45 | -1.83 | -1.39 | -1.39 | -1.18 | -1.78 | -1.78 | -0.86 | -0.57 | -1.47 | -0.94 | -  |
|           | 0.91       | -1.08      | -0.66 | -0.43 | 0.02  | 0.38  | 0.13  | 0.2   | -0.13 | -0.43 | -0.18 | -0.3  | -     |    |
| GENE730X  | 19720_at   | 19720_at   | 1     | -3.64 | -3.83 | -3.05 | -3.64 | -2.73 | -1.73 | -     |       |       |       |    |
|           | 1.78       | -1.88      | -0.76 | -2.73 | -0.76 | -1.59 | -1.69 | -1.15 | -3.05 | -0.43 | 0.18  | -0.86 | 0.01  | -  |
|           | 0.1        | -0.51      | -1    | -0.45 | -0.49 | -0.23 | 0     | -0.15 | -0.34 | -0.41 | 0.01  | -0.1  | -     |    |

|          |            |            |       |       |       |       |       |       |       |       |       |       |       |    |
|----------|------------|------------|-------|-------|-------|-------|-------|-------|-------|-------|-------|-------|-------|----|
| GENE729X | 20216_s_at | 20216_s_at | 1     | -3.83 | -3.32 | -3.64 | -4.32 | -3.32 | -2.05 | -     |       |       |       |    |
|          | 1.88       | -2.94      | -0.66 | -2.94 | -0.73 | -1.25 | -1.02 | -1.35 | -2.55 | -0.78 | -0.16 | -0.86 | -0.45 | -  |
|          | 0.21       | -1.55      | -0.43 | -1.94 | -1.28 | -0.86 | -0.08 | 0.02  | -0.34 | -0.12 | 0.34  | 0.2   |       |    |
| GENE731X | 18416_at   | 18416_at   | 1     | -3.18 | -4.64 | -5.64 | -3.47 | -2.64 | -2.47 | -     |       |       |       |    |
|          | 2.25       | -2.64      | -1.28 | -2.32 | -0.97 | -2    | -1.43 | -1.25 | -3.18 | -0.66 | -0.55 | -0.91 | -1.59 | -  |
|          | 1.88       | -3.83      | -1.83 | -1.83 | -1.78 | -0.71 | -1.05 | -0.59 | -0.25 | -0.49 | -0.43 | -0.15 |       |    |
| GENE732X | 16687_at   | 16687_at   | 1     | -0.78 | -1.73 | -1.39 | -0.88 | -0.83 | -0.71 | -     |       |       |       |    |
|          | 1.08       | -1.02      | -0.25 | -0.41 | -0.08 | -0.59 | -0.59 | -0.32 | -0.86 | 0.08  | 0.21  | -0.39 | -0.41 | -  |
|          | 0.34       | -0.78      | -0.57 | -0.59 | -0.3  | -0.01 | 0.01  | -0.15 | -0.15 | -0.02 | 0.18  | 0.12  |       |    |
| GENE333X | 17063_s_at | 17063_s_at | 1     | -0.55 | -1.39 | -1    | -1.12 | -0.73 | -0.66 | -     |       |       |       |    |
|          | 0.86       | -1.05      | -0.2  | -0.64 | -0.35 | -0.57 | -0.43 | -0.88 | -1    | -0.05 | 0     | -0.3  | -0.47 | -  |
|          | 0.39       | -0.59      | -0.43 | -0.39 | -0.2  | -0.3  | 0.21  | 0.02  | 0.02  | -0.15 | 0.15  | -0.02 |       |    |
| GENE765X | 17494_s_at | 17494_s_at | 1     | -1.51 | -1.83 | -2.83 | -2.64 | -2.32 | -2.05 | -     |       |       |       |    |
|          | 2.73       | -2.12      | -0.47 | -0.86 | -0.91 | -1.08 | -1.21 | -1.83 | -1.25 | 0.12  | -0.2  | -1.43 | -0.88 | -  |
|          | 0.71       | -1.15      | -1.18 | -0.71 | -0.59 | -0.25 | -0.35 | -0.13 | -0.37 | -0.66 | 0.68  | 0.31  |       |    |
| GENE764X | 12313_g_at | 12313_g_at | 1     | -2.73 | -2    | -3.64 | -3.47 | -3.05 | -2.83 | -     |       |       |       |    |
|          | 2.73       | -2.39      | -0.76 | -1.47 | -1.35 | -1.51 | -1.28 | -2    | -2    | -0.43 | -0.55 | -2.05 | -1.35 | -  |
|          | 0.68       | -1.64      | -1.51 | -1.47 | -0.91 | -0.39 | -0.3  | -0.16 | -0.23 | -0.23 | 0.6   | 0.23  |       |    |
| GENE330X | 17560_s_at | 17560_s_at | 1     | -3.05 | -3.47 | -4.64 | -4.32 | -3.32 | -2.94 | -     |       |       |       |    |
|          | 4.05       | -2.94      | -0.47 | -1.83 | -1.83 | -2.55 | -2.18 | -2.73 | -2.55 | -1.12 | -1.28 | -1.73 | -1.47 | -  |
|          | 0.59       | -1.39      | -1.64 | -1.51 | -1.15 | -1.02 | -0.88 | 0.08  | -0.2  | -0.18 | 0.52  | 0.08  |       |    |
| GENE328X | 15368_at   | 15368_at   | 1     | -1    | -1.32 | -1.73 | -1.88 | -1.59 | -1.55 | -     |       |       |       |    |
|          | 1.08       | -1.43      | -0.76 | -0.66 | -0.86 | -0.78 | -0.68 | -1.12 | -1.08 | -0.59 | -0.2  | -1.12 | -1    | -  |
|          | 0.26       | -0.94      | -0.71 | -0.94 | -0.35 | -0.2  | 0.12  | -0.47 | -0.21 | -0.12 | -0.2  | -0.28 |       |    |
| GENE327X | 12430_at   | 12430_at   | 1     | -2.73 | -3.47 | -5.05 | -4.32 | -3.47 | -2.94 | -     |       |       |       |    |
|          | 3.32       | -3.18      | -0.81 | -1.94 | -1.28 | -2.73 | -1.78 | -2.73 | -2.25 | -1.12 | -0.57 | -1.64 | -1.73 | -  |
|          | 0.83       | -1.94      | -0.88 | -1.18 | -1    | -0.21 | -0.43 | -1.94 | -0.86 | -0.78 | -0.18 | -0.21 |       |    |
| GENE326X | 20330_at   | 20330_at   | 1     | -2.73 | -1.94 | -4.05 | -3.18 | -2.64 | -2.64 | -     |       |       |       |    |
|          | 3.47       | -3.83      | -1.32 | -2.05 | -2.25 | -1.55 | -1.55 | -3.18 | -2.47 | -1.43 | -0.83 | -2.12 | -2.25 | -  |
|          | 0.88       | -1.51      | -1.94 | -0.76 | -0.68 | -0.68 | -0.64 | -1.59 | -0.26 | -0.53 | -0.81 | -0.3  |       |    |
| GENE322X | 20317_at   | 20317_at   | 1     | -2.18 | -2.12 | -2.55 | -4.32 | -2.55 | -2.39 | -     |       |       |       |    |
|          | 2.55       | -2.73      | -1.05 | -1.69 | -1.39 | -1.78 | -1.51 | -2.32 | -1.88 | -1.35 | -0.97 | -1.39 | -1.39 | -  |
|          | 0.88       | -1.55      | -1.51 | -1.15 | -0.49 | -0.3  | 0.09  | 0.31  | -0.28 | -0.34 | 0.67  | 0.26  |       |    |
| GENE321X | 19034_at   | 19034_at   | 1     | -3.18 | -3.64 | -4.05 | -4.32 | -3.83 | -3.32 | -     |       |       |       |    |
|          | 4.05       | -4.32      | -2.32 | -2.18 | -2.25 | -2.12 | -2.32 | -3.83 | -2    | -2.05 | -1.88 | -2.12 | -0.62 | -  |
|          | 1.21       | -1.18      | -1.64 | -2.05 | -1.94 | -1.43 | -0.23 | 0.2   | -0.35 | -0.35 | -0.47 | -0.49 |       |    |
| GENE13X  | 17196_at   | 17196_at   | 1     | -2.39 | -4.32 | -4.05 | -4.64 | -4.32 | -3.47 | -     |       |       |       |    |
|          | 3.83       | -3.83      | -1.88 | -3.32 | -2.73 | -2.64 | -2.32 | -3.83 | -3.47 | -1.32 | -1.18 | -2.83 | -2.32 | -  |
|          | 2.25       | -2.05      | -3.32 | -1.88 | -1.55 | -1.55 | -2.39 | 0.35  | -0.28 | -0.73 | 0.45  | 0.23  |       |    |
| GENE320X | 15947_at   | 15947_at   | 1     | -1.88 | -1.83 | -2.94 | -2.25 | -2.55 | -1.73 | -     |       |       |       |    |
|          | 2.32       | -1.88      | -0.94 | -1.35 | -1.64 | -2    | -1.94 | -0.94 | -1.21 | -1.18 | -0.97 | -1.43 | -0.81 | -  |
|          | 0.76       | -1.43      | -0.39 | -0.97 | -0.64 | -0.49 | 0.21  | -0.07 | -0.21 | 0     | -0.04 | -0.28 |       |    |
| GENE319X | 16019_at   | 16019_at   | 1     | -2.05 | -2.12 | -2.64 | -2.39 | -1.73 | -1.64 | -     |       |       |       |    |
|          | 1.64       | -1.69      | -0.59 | -1.55 | -1.08 | -1.47 | -1.15 | -1.12 | -1.64 | -0.64 | -0.41 | -1.02 | -0.86 | -  |
|          | 0.73       | -1.21      | -0.53 | -1    | -0.68 | -0.3  | -0.21 | -0.35 | -0.2  | -0.2  | -0.3  | -0.3  |       |    |
| GENE318X | 14542_i_at | 14542_i_at | 1     | -2.73 | -3.18 | -3.32 | -4.32 | -3.05 | -2.64 | -     |       |       |       |    |
|          | 2.94       | -3.18      | -0.78 | -2.25 | -1.43 | -2.25 | -1.43 | -1.73 | -2.73 | -0.88 | -0.57 | -1.43 | -1.15 | -  |
|          | 0.78       | -2.25      | -1.21 | -1.73 | -1.18 | -0.68 | -0.86 | -0.21 | -0.1  | -0.15 | 0.09  | 0     |       |    |
| GENE317X | 19695_at   | 19695_at   | 1     | -5.64 | -6.64 | -5.05 | -5.64 | -5.64 | -5.64 | -     |       |       |       |    |
|          | 4.32       | -4.32      | -1.64 | -3.47 | -2.39 | -5.05 | -3.83 | -4.32 | -4.32 | -2    | -2.25 | -3.05 | -2.05 | -2 |
|          |            | -4.05      | -2.73 | -3.05 | -2.05 | -0.2  | -0.71 | -0.43 | -0.51 | -0.43 | 0.48  | 0.02  |       |    |
| GENE342X | 13553_at   | 13553_at   | 1     | -0.73 | -2.25 | -2.55 | -2.05 | -1.47 | -1.43 | -     |       |       |       |    |
|          | 1.73       | -1.78      | -0.91 | -1.78 | -1.51 | -1.94 | -1.55 | -1.51 | -2.25 | -1.02 | -0.86 | -1.02 | -0.13 | -  |
|          | 0.34       | -0.78      | -0.26 | -0.62 | -0.62 | -0.39 | -0.2  | -0.41 | -0.37 | -0.43 | -0.13 | -0.25 |       |    |
| GENE341X | 16983_at   | 16983_at   | 1     | -0.94 | -1.94 | -2.25 | -2.12 | -1.78 | -1.25 | -     |       |       |       |    |
|          | 1.25       | -1.28      | -0.81 | -1.08 | -1.02 | -1.47 | -1.43 | -0.94 | -1.43 | -0.51 | -0.37 | -0.81 | -0.35 | -  |
|          | 0.3        | -0.64      | -0.53 | -0.81 | -0.51 | -0.45 | -0.37 | 0.28  | -0.13 | -0.23 | 0.11  | 0.04  |       |    |

|           |            |            |       |       |       |       |       |       |       |       |       |       |   |
|-----------|------------|------------|-------|-------|-------|-------|-------|-------|-------|-------|-------|-------|---|
| GENE340X  | 14808_i_at | 14808_i_at | 1     | -1.39 | -2.47 | -2.55 | -2.12 | -1.88 | -1.73 | -     |       |       |   |
| 2.55      | -1.51      | -1.88      | -1.64 | -0.91 | -1.59 | -1.39 | -1.32 | -1.55 | -0.53 | -0.83 | -0.81 | -0.1  | - |
| 0.78      | -0.83      | -0.28      | -1.15 | -1.43 | -1.15 | -1.15 | -0.28 | -0.73 | -0.45 | -0.28 | -0.25 |       |   |
| GENE332X  | 13621_g_at | 13621_g_at | 1     | -0.78 | -1.47 | -1.51 | -1.69 | -0.97 | -1.43 | -     |       |       |   |
| 1.69      | -1.59      | -0.26      | -1.08 | -0.23 | -1.18 | -0.91 | -1.21 | -1.47 | -0.28 | -0.15 | -0.76 | -0.71 | - |
| 0.83      | -0.88      | -0.37      | -1.02 | -0.47 | -0.28 | -0.34 | -0.68 | 0.07  | 0.11  | 0.25  | 0.12  |       |   |
| GENE331X  | 14508_at   | 14508_at   | 1     | -1.78 | -3.05 | -3.47 | -5.05 | -2.83 | -2.94 | -     |       |       |   |
| 5.05      | -2.64      | -0.64      | -2.83 | -1.73 | -2.94 | -1.64 | -1.88 | -2.64 | -0.71 | -0.08 | -1.43 | -1.47 | - |
| 1.28      | -1.21      | -0.66      | -2    | -1.05 | -0.62 | -0.88 | -0.71 | 0.26  | -0.39 | 0.07  | -0.39 |       |   |
| GENE1029X | 18669_at   | 18669_at   | 1     | -0.88 | -0.76 | -0.86 | -0.86 | -0.41 | -1.25 | -     |       |       |   |
| 0.43      | -0.13      | -0.28      | -0.68 | -0.57 | -0.83 | -0.55 | -0.15 | -1.05 | -0.53 | -0.2  | -0.41 | -0.32 | - |
| 0.23      | -0.62      | -0.15      | -0.3  | -0.2  | -0.08 | 0.12  | 0.01  | -0.28 | -0.32 | 0.02  | 0.09  |       |   |
| GENE1028X | 18670_g_at | 18670_g_at | 1     | -1.47 | -1.12 | -1.51 | -1.21 | -1    | -2.12 | -     |       |       |   |
| 1.02      | -0.55      | -0.76      | -1.08 | -0.64 | -1.25 | -0.88 | -0.47 | -1.64 | -0.73 | -0.34 | -0.55 | -0.26 | - |
| 0.83      | -1         | -0.68      | -0.78 | -0.73 | -0.43 | -0.05 | 0.04  | -0.41 | -0.41 | -0.26 | -0.21 |       |   |
| GENE1027X | 17936_s_at | 17936_s_at | 1     | -1.02 | -1.55 | -0.97 | -1.02 | -1.28 | -2.25 | -     |       |       |   |
| 0.83      | -0.83      | -0.97      | -1.15 | -0.43 | -1.21 | -0.91 | -0.35 | -1.18 | -0.51 | -0.37 | -0.43 | -0.16 | - |
| 0.97      | -0.94      | -0.78      | -0.83 | -0.97 | -0.57 | -0.26 | -0.07 | -0.45 | -0.51 | -0.07 | 0.07  |       |   |
| GENE1026X | 18560_at   | 18560_at   | 1     | -2.94 | -2.39 | -2.25 | -1.88 | -1.47 | -1.69 | -     |       |       |   |
| 0.91      | -0.91      | -0.05      | -1.73 | -0.32 | -1.18 | -0.73 | -0.49 | -2.25 | -1.83 | -0.94 | -0.51 | -0.86 | - |
| 1.39      | -1.35      | -0.71      | -1.43 | -0.83 | -0.76 | -0.26 | -0.97 | -0.43 | -0.55 | -0.45 | -0.76 |       |   |
| GENE1025X | 13927_at   | 13927_at   | 1     | -1.64 | -1.15 | -1.32 | -1.55 | -1.47 | -1.35 | 0     |       |       |   |
| -0.07     | -0.53      | -1.05      | -0.49 | -0.62 | -0.62 | 0.32  | -1.43 | -0.18 | -0.53 | -0.21 | -0.53 | -     |   |
| 0.3       | -0.64      | -1.21      | -0.88 | -0.81 | -0.35 | -0.43 | -0.59 | -0.34 | -0.37 | -0.05 | -0.02 |       |   |
| GENE523X  | 12768_at   | 12768_at   | 1     | -1.69 | -1.43 | -1.32 | -1.83 | -1.51 | -2    | -     |       |       |   |
| 0.62      | -1.25      | -1.02      | -0.64 | -0.73 | -0.64 | -0.94 | -0.71 | -1.12 | -0.78 | -0.34 | -0.66 | -0.97 | - |
| 0.78      | -0.83      | -0.3       | -0.25 | -0.25 | -0.23 | 0     | -0.18 | 0.2   | 0.04  | -0.66 | -0.91 |       |   |
| GENE522X  | 17399_at   | 17399_at   | 1     | -2.18 | -0.78 | -1.32 | -1.47 | -1.08 | -1.59 | -     |       |       |   |
| 0.62      | -1.28      | -0.62      | -0.66 | -0.41 | -0.68 | -0.53 | -0.49 | -0.91 | -0.45 | -0.37 | -0.55 | -0.91 | - |
| 0.47      | -0.81      | -0.53      | -0.64 | -0.51 | -0.1  | -0.08 | -0.1  | -0.32 | 0.08  | -0.43 | -0.45 |       |   |
| GENE521X  | 15472_at   | 15472_at   | 1     | -3.64 | -2.25 | -2.05 | -2.73 | -2.73 | -2.64 | -     |       |       |   |
| 1.47      | -2.32      | -1.18      | -0.05 | -0.41 | -1.51 | -1.05 | -0.97 | -1.69 | -0.53 | -0.71 | -0.64 | -1.59 | - |
| 1.12      | -2.18      | -1.59      | -1.59 | -1.43 | -0.78 | -0.55 | -0.25 | -0.32 | 0     | -0.88 | -0.66 |       |   |
| GENE524X  | 15576_s_at | 15576_s_at | 1     | -3.18 | -1.69 | -2.25 | -2.94 | -2.64 | -2.83 | -     |       |       |   |
| 1.28      | -0.83      | -1.47      | -0.28 | -0.55 | -1.12 | -1.25 | -0.34 | -1.73 | -1.88 | -1.88 | -0.88 | -1.39 | - |
| 2.12      | -2         | -0.83      | -1.73 | -1.51 | -1.05 | -0.51 | -0.78 | 0.22  | 0.54  | -1.08 | -1.32 |       |   |
| GENE526X  | 18565_i_at | 18565_i_at | 1     | -2    | -1.73 | -1.51 | -2.05 | -1.18 | -1.02 | -     |       |       |   |
| 0.83      | -0.71      | -0.41      | -0.34 | -0.07 | -0.64 | -0.88 | -0.28 | -0.59 | -0.73 | -0.66 | -0.25 | -0.53 | - |
| 0.88      | -0.83      | -0.28      | -0.64 | -0.32 | 0.09  | -0.07 | -0.51 | -0.08 | -0.02 | -0.39 | -0.45 |       |   |
| GENE525X  | 18566_s_at | 18566_s_at | 1     | -2.05 | -1.88 | -1.73 | -2.55 | -1.43 | -1.43 | -     |       |       |   |
| 1.05      | -1.12      | -0.47      | -0.47 | -0.39 | -0.86 | -0.91 | -0.94 | -0.94 | -0.76 | -0.49 | -0.55 | -0.88 | - |
| 0.94      | -0.91      | -0.47      | -0.73 | -0.55 | -0.04 | -0.02 | -0.35 | 0.02  | 0.08  | -0.32 | -0.39 |       |   |
| GENE367X  | 19452_at   | 19452_at   | 1     | -1.83 | -1.05 | -1.43 | -2.05 | -0.83 | -0.88 | -     |       |       |   |
| 0.73      | -1.12      | -0.64      | -0.71 | -0.57 | -0.37 | -0.68 | -0.53 | -0.83 | -0.81 | -0.73 | -0.83 | -0.91 | - |
| 0.76      | -0.94      | -0.64      | -0.97 | -0.64 | -0.26 | -0.16 | 0.01  | -0.18 | -0.12 | -0.3  | -0.47 |       |   |
| GENE502X  | 19913_at   | 19913_at   | 1     | -2.39 | -1.35 | -1.51 | -1.21 | -1.73 | -1.55 | -     |       |       |   |
| 1.43      | -1.78      | -0.83      | -0.59 | -0.45 | -0.55 | -0.88 | -1.15 | -1.15 | -0.81 | -0.71 | -0.71 | -1.32 | - |
| 0.66      | -1         | -1.08      | -1.15 | -0.94 | -0.43 | -1.05 | -1.94 | -0.41 | -0.3  | 0.01  | 0.12  |       |   |
| GENE501X  | 14081_at   | 14081_at   | 1     | -1.73 | -1.78 | -1.05 | -1.78 | -1.83 | -1.69 | -     |       |       |   |
| 1.88      | -1.64      | -0.97      | -0.28 | -0.73 | -1.05 | -1.08 | -0.76 | -0.86 | -1    | -0.91 | -1.35 | -0.51 | - |
| 0.55      | -1.39      | -1.55      | -1.35 | -0.94 | -1    | -0.32 | -1.21 | -0.64 | -0.55 | 0.04  | -0.07 |       |   |
| GENE371X  | 13954_g_at | 13954_g_at | 1     | -4.05 | -2.39 | -2.64 | -4.64 | -2.94 | -1.94 | -     |       |       |   |
| 2.47      | -2.47      | -0.25      | -0.71 | -0.64 | -0.94 | -1.15 | -1.12 | -1.59 | -0.37 | -0.41 | -1.21 | -1.39 | - |
| 0.66      | -1.32      | -0.91      | -1.59 | -1.78 | -1    | -0.32 | -2.73 | -0.62 | -0.91 | -0.43 | -0.07 |       |   |
| GENE372X  | 19227_at   | 19227_at   | 1     | -2.05 | -1.73 | -1.43 | -2.55 | -1.59 | -1.21 | -     |       |       |   |
| 1.28      | -1.35      | -0.16      | -0.15 | -0.25 | -0.39 | -0.51 | -0.64 | -0.55 | -0.49 | -0.21 | -0.51 | -1.05 | - |
| 0.81      | -0.97      | -0.45      | -1.02 | -0.76 | -0.43 | -0.25 | -0.83 | 0.01  | -0.04 | -0.57 | -0.51 |       |   |

|           |            |            |       |       |       |       |       |       |       |       |
|-----------|------------|------------|-------|-------|-------|-------|-------|-------|-------|-------|
| GENE156X  | 19626_i_at | 19626_i_at | 1     | -2.73 | -1.88 | -3.05 | -3.83 | -2.83 | -2.39 | -2    |
|           | -2.32      | -0.45      | -0.49 | -0.73 | -0.88 | -1.51 | -0.73 | -0.78 | -0.43 | -1    |
|           | 1.43       | -1.21      | -1.02 | -1.73 | -1.83 | -0.83 | -0.23 | -0.83 | -0.39 | -0.15 |
| GENE247X  | 18007_i_at | 18007_i_at | 1     | -1.83 | -1    | -1.15 | -1.43 | -1.08 | -1.05 | -     |
|           | 1.05       | -1         | -0.41 | -0.37 | -0.41 | -0.23 | -0.41 | -0.64 | -0.47 | -0.25 |
|           | 1.08       | -0.62      | -0.59 | -0.73 | -0.91 | -0.23 | -0.21 | -0.39 | -0.51 | -0.32 |
| GENE244X  | 12033_at   | 12033_at   | 1     | -3.47 | -2.94 | -1.83 | -2.47 | -2.73 | -2.39 | -     |
|           | 2.39       | -2.12      | -0.73 | -0.05 | -0.76 | -1.12 | -1.12 | -0.94 | -0.66 | -0.94 |
|           | 0.71       | -1.15      | -1.55 | -1.73 | -1.47 | -0.15 | -0.26 | -0.83 | -0.49 | -0.49 |
| GENE245X  | 13637_at   | 13637_at   | 1     | -3.18 | -2.05 | -2.05 | -2.25 | -2.83 | -2.94 | -     |
|           | 1.83       | -1.83      | -1.25 | -0.76 | -0.41 | -0.88 | -1.05 | -1.21 | -1    | -0.68 |
|           | 0.68       | -1.25      | -1.18 | -2.05 | -2    | -1.08 | -0.49 | -0.15 | -0.34 | -0.28 |
| GENE246X  | 17471_at   | 17471_at   | 1     | -1.28 | -1.08 | -0.97 | -1.15 | -1.08 | -1.18 | -     |
|           | 1.12       | -1.12      | -0.32 | -0.3  | -0.12 | -0.51 | -0.37 | -0.68 | -0.51 | -0.21 |
|           | 0.51       | -0.83      | -0.45 | -0.81 | -0.83 | -0.39 | -0.1  | -0.05 | -0.39 | -0.3  |
| GENE92X   | 12784_at   | 12784_at   | 1     | -3.32 | -2.32 | -3.05 | -3.18 | -2.83 | -2.32 | -     |
|           | 2.55       | -2.25      | -0.94 | -0.97 | -0.81 | -1.32 | -1.21 | -1.55 | -1.28 | -0.57 |
|           | 1.55       | -2.32      | -1    | -1.69 | -1.51 | -0.78 | -0.71 | -0.57 | -0.91 | -0.41 |
| GENE1024X | 15761_at   | 15761_at   | 1     | -4.05 | -2.55 | -2.47 | -4.32 | -4.05 | -3.64 | -     |
|           | 1.59       | -0.59      | -0.64 | -1.88 | -1.39 | -1.83 | -2.12 | -0.32 | -2.64 | -1.08 |
|           | 1.08       | -2         | -1.32 | -3.64 | -2.39 | -1.08 | -0.18 | -0.66 | -0.57 | -0.16 |
| GENE235X  | 13910_at   | 13910_at   | 1     | -1.59 | -1    | -0.94 | -1.73 | -1.73 | -1.69 | -     |
|           | 0.68       | -0.78      | -0.73 | -0.41 | -0.35 | -0.55 | -0.51 | -0.35 | -0.41 | -0.16 |
|           | 0.68       | -0.94      | -1.08 | -1.02 | -1.02 | -0.71 | -0.64 | -0.2  | -0.2  | -0.16 |
| GENE234X  | 14867_at   | 14867_at   | 1     | -3.18 | -1.35 | -1.69 | -3.18 | -1.94 | -2.39 | -     |
|           | 1.15       | -1.73      | -1.18 | -0.66 | -0.78 | -1.35 | -0.91 | -0.88 | -1    | -0.15 |
|           | 0.78       | -1.25      | -1.35 | -1.73 | -1.21 | -0.59 | -1.05 | -0.53 | -0.23 | -0.16 |
| GENE366X  | 15179_s_at | 15179_s_at | 1     | -1.18 | -1.18 | -1.05 | -1.78 | -1.05 | -1    | -     |
|           | 0.51       | -0.73      | -0.55 | -0.91 | -0.86 | -0.81 | -0.59 | -0.78 | -1.08 | -0.25 |
|           | 0.62       | -0.91      | -0.43 | -0.86 | -0.81 | -0.32 | -0.53 | -0.41 | -0.16 | -0.18 |
| GENE365X  | 16529_at   | 16529_at   | 1     | -1.21 | -1.32 | -1.32 | -2.12 | -1.25 | -1.25 | -     |
|           | 1.28       | -0.81      | -0.97 | -0.73 | -0.83 | -1.25 | -1.05 | -0.64 | -1.12 | -0.78 |
|           | 0.51       | -1.21      | -1.18 | -0.83 | -0.81 | -0.45 | -0.64 | -0.57 | -0.37 | -0.23 |
| GENE360X  | 14063_at   | 14063_at   | 1     | -1.43 | -1.39 | -1.88 | -2.25 | -2.05 | -1.64 | -     |
|           | 0.66       | -1         | -1    | -0.83 | -0.88 | -0.71 | -0.83 | -0.66 | -0.97 | -0.32 |
|           | 0.25       | -0.59      | -1.02 | -0.62 | -0.47 | -0.08 | -0.66 | -0.23 | -0.15 | -0.04 |
| GENE359X  | 19660_at   | 19660_at   | 1     | -2.55 | -2.73 | -5.05 | -5.64 | -4.64 | -4.32 | -     |
|           | 1.73       | -1.32      | -1.59 | -1.55 | -2.05 | -2.47 | -2    | -0.73 | -1.83 | -1.64 |
|           | 0.41       | -1.94      | -2.55 | -1.25 | -1.59 | -0.71 | -1.32 | -1.47 | -0.13 | -0.26 |
| GENE358X  | 15153_at   | 15153_at   | 1     | -3.47 | -3.64 | -3.83 | -5.05 | -4.32 | -3.64 | -     |
|           | 2.18       | -2.64      | -0.94 | -0.43 | -1.39 | -1.25 | -2.18 | -1.39 | -1.08 | -0.91 |
|           | 1.08       | -1.02      | -2.64 | -1.35 | -1.47 | -0.62 | -0.71 | -0.2  | -0.12 | -0.15 |
| GENE529X  | 14534_s_at | 14534_s_at | 1     | -1.18 | -1.32 | -2.64 | -1.94 | -2.05 | -2.25 | -     |
|           | 0.76       | -0.81      | -0.43 | -0.78 | -0.45 | -0.88 | -0.71 | -0.41 | -1.12 | -0.08 |
|           | 0.86       | -1.18      | -0.94 | -1.47 | -1.32 | -0.68 | -0.86 | -0.28 | -0.3  | -0.23 |
| GENE528X  | 14080_at   | 14080_at   | 1     | -1.32 | -1.05 | -2.47 | -1.59 | -2.18 | -2    | -     |
|           | 0.86       | -0.94      | -0.55 | -0.64 | -0.39 | -0.94 | -1    | -0.55 | -1.73 | -0.43 |
|           | 1.32       | -1.32      | -1.35 | -1.43 | -1.25 | -0.71 | -0.28 | -0.59 | -0.15 | 0.01  |
| GENE253X  | 15407_at   | 15407_at   | 1     | -2    | -1.73 | -1.64 | -1.59 | -1.94 | -1.73 | -     |
|           | 1.12       | -0.94      | -0.43 | -0.25 | -0.35 | -0.35 | -0.25 | -0.25 | -0.66 | -0.13 |
|           | 0.83       | -0.94      | -1.35 | -1.28 | -0.97 | -0.41 | -0.76 | -0.34 | -0.23 | -0.34 |
| GENE241X  | 13682_s_at | 13682_s_at | 1     | -1.94 | -2.05 | -1.88 | -1.78 | -1.78 | -1.39 | -     |
|           | 1.59       | -1.02      | -0.47 | -0.81 | -0.34 | -0.73 | -0.66 | -0.47 | -0.97 | -0.32 |
|           | 1.32       | -1.18      | -0.97 | -1.43 | -1.35 | -0.78 | -0.49 | -0.26 | -0.07 | 0.07  |
| GENE240X  | 15645_s_at | 15645_s_at | 1     | -2    | -1.94 | -2.18 | -2.64 | -2    | -1.64 | -     |
|           | 1.59       | -1.32      | -0.51 | -0.59 | -0.45 | -0.78 | -0.86 | -0.59 | -1.05 | -0.21 |
|           | 1.28       | -1.51      | -1.15 | -1.59 | -1.35 | -0.59 | -0.41 | -0.28 | -0.3  | -0.2  |

|          |            |            |       |       |       |       |       |       |       |       |       |       |    |
|----------|------------|------------|-------|-------|-------|-------|-------|-------|-------|-------|-------|-------|----|
| GENE239X | 16322_at   | 16322_at   | 1     | -3.47 | -3.83 | -3.83 | -4.05 | -3.64 | -3.64 | -     |       |       |    |
| 3.18     | -3.18      | -0.86      | -1.51 | -1    | -1.83 | -1.69 | -1.15 | -1.94 | -0.76 | -0.41 | -1.35 | -2.05 | -2 |
|          | -3.32      | -2.32      | -2.94 | -3.64 | -1.05 | -1.05 | -0.68 | -0.68 | -0.64 | -0.1  | -0.07 |       |    |
| GENE238X | 20523_at   | 20523_at   | 1     | -2.12 | -1.73 | -2    | -2.12 | -1.73 | -1.78 | -     |       |       |    |
| 0.76     | -0.91      | -0.32      | -0.86 | -0.57 | -0.94 | -0.86 | 0.01  | -0.86 | -0.41 | -0.91 | -0.68 | -0.76 | -  |
| 0.88     | -1.43      | -0.94      | -1.73 | -1.59 | -0.73 | -0.68 | -0.83 | -0.39 | -0.21 | -0.21 | -0.1  |       |    |
| GENE237X | 11992_at   | 11992_at   | 1     | -1.59 | -1.73 | -2    | -1.64 | -1.83 | -2.05 | -     |       |       |    |
| 1.12     | -1.47      | -0.66      | -0.59 | -0.23 | -0.73 | -0.78 | -0.53 | -0.97 | -0.43 | -0.83 | -0.59 | -1.08 | -  |
| 0.86     | -1.08      | -0.76      | -1.25 | -1.25 | -0.83 | -0.83 | -0.81 | -0.39 | -0.01 | -0.49 | -0.26 |       |    |
| GENE236X | 13619_at   | 13619_at   | 1     | -3.32 | -2.83 | -3.64 | -4.05 | -3.83 | -3.83 | -2    |       |       |    |
| -2       | -0.97      | -1.47      | -0.71 | -1.78 | -1.64 | -1    | -2.64 | -0.43 | -0.53 | -0.83 | -0.91 | -     |    |
| 1.59     | -1.88      | -1.78      | -2.94 | -2.47 | -1.28 | -1.88 | -0.94 | -0.21 | 0.04  | -1.15 | 0.07  |       |    |
| GENE243X | 17112_s_at | 17112_s_at | 1     | -0.94 | -1.18 | -1.08 | -1.35 | -1.15 | -1.35 | -     |       |       |    |
| 0.43     | -0.86      | -0.49      | -0.34 | -0.32 | -0.66 | -0.64 | -0.41 | -0.81 | -0.13 | -0.1  | -0.35 | -0.43 | -  |
| 1.02     | -0.94      | -0.41      | -1    | -0.73 | -0.28 | -0.16 | 0.08  | -0.01 | -0.21 | 0.09  | -0.15 |       |    |
| GENE233X | 13595_at   | 13595_at   | 1     | -1.28 | -1    | -1.08 | -1.55 | -1.43 | -1.59 | -     |       |       |    |
| 0.97     | -1.12      | -0.59      | -0.35 | -0.12 | -0.64 | -0.88 | -0.55 | -0.81 | -0.02 | 0.02  | -0.34 | -0.45 | -  |
| 0.83     | -0.83      | -0.94      | -0.81 | -0.62 | -0.28 | -0.34 | 0.01  | 0.01  | 0.07  | -0.1  | 0.07  |       |    |
| GENE232X | 16302_at   | 16302_at   | 1     | -1.83 | -1.51 | -1.43 | -1.88 | -2.39 | -2.47 | -     |       |       |    |
| 1.12     | -1.39      | -1.05      | -0.68 | -0.26 | -0.86 | -0.86 | -0.78 | -1.08 | -0.08 | -0.15 | -0.18 | -0.23 | -  |
| 0.78     | -0.81      | -1.43      | -1.28 | -0.97 | -0.53 | -0.32 | -0.04 | -0.21 | -0.07 | -0.34 | -0.34 |       |    |
| GENE231X | 18439_s_at | 18439_s_at | 1     | -2.55 | -2.73 | -2.73 | -3.05 | -3.05 | -3.64 | -     |       |       |    |
| 1.88     | -2.39      | -1         | -0.83 | -0.37 | -1.28 | -1.12 | -1.08 | -1.43 | -0.37 | -0.41 | -0.55 | -0.68 | -  |
| 0.68     | -1.28      | -1.47      | -1.59 | -1.39 | -0.66 | -0.83 | -0.25 | -0.28 | -0.23 | -0.21 | -0.08 |       |    |
| GENE349X | 15127_s_at | 15127_s_at | 1     | -1    | -1.59 | -1.28 | -1.43 | -1.21 | -0.88 | -     |       |       |    |
| 1.32     | -1.08      | -0.53      | -0.94 | -0.55 | -0.94 | -0.97 | -0.76 | -1.35 | -0.32 | -0.45 | -0.68 | -0.59 | -  |
| 1.47     | -0.81      | -0.64      | -0.71 | -0.76 | -0.37 | -0.53 | -0.05 | 0.05  | 0.12  | -0.25 | -0.15 |       |    |
| GENE348X | 16137_s_at | 16137_s_at | 1     | -3.05 | -3.47 | -2.94 | -4.05 | -2.25 | -2.12 | -     |       |       |    |
| 3.64     | -2.73      | -0.73      | -1.55 | -1.55 | -1.88 | -1.78 | -2.47 | -2.47 | -1.35 | -1.12 | -1.35 | -1.55 | -  |
| 2.83     | -2.39      | -0.97      | -2.47 | -1.18 | -0.55 | 0.32  | -0.05 | 0.31  | 0.16  | 0.12  | -0.23 |       |    |
| GENE347X | 14994_at   | 14994_at   | 1     | -2.83 | -2.47 | -2.55 | -3.05 | -2.25 | -1.69 | -     |       |       |    |
| 2.18     | -1.47      | -1.69      | -1.78 | -1.64 | -1.32 | -1.32 | -2.18 | -2.55 | -1.32 | -1.43 | -1.32 | -2    | -  |
| 2.18     | -2.55      | -0.91      | -2.64 | -1.88 | -1.15 | -0.57 | -0.86 | 0.08  | 0.04  | -0.94 | -0.66 |       |    |
| GENE346X | 20573_at   | 20573_at   | 1     | -3.32 | -2.47 | -2.55 | -3.18 | -1.94 | -2.25 | -     |       |       |    |
| 2.94     | -2.05      | -0.07      | -1.12 | -0.62 | -1.83 | -2.83 | -2.94 | -2.55 | -0.97 | -0.76 | -1.78 | -0.94 | -  |
| 1.73     | -2.05      | -0.45      | -2.18 | -2.73 | -1.43 | -0.2  | -0.66 | -0.94 | -0.81 | -0.59 | -0.51 |       |    |
| GENE338X | 14512_r_at | 14512_r_at | 1     | -1.64 | -1.94 | -2.55 | -3.32 | -1.35 | -1.32 | -     |       |       |    |
| 1.78     | -1.64      | -0.43      | -1.12 | -1.35 | -0.94 | -1.05 | -0.94 | -1.43 | -0.91 | -0.97 | -1.12 | -0.81 | -  |
| 1.02     | -1.18      | -0.13      | -2    | -2.12 | -1.43 | -0.34 | -0.18 | -0.21 | -0.25 | 0.08  | -0.18 |       |    |
| GENE337X | 15074_s_at | 15074_s_at | 1     | -1.47 | -1.43 | -3.32 | -2.55 | -1.73 | -0.83 | -2    |       |       |    |
| -1.43    | -1.12      | -1.51      | -0.83 | -0.86 | -1.28 | -1.05 | -1.35 | -0.78 | -0.83 | -1.21 | -1.08 | -     |    |
| 0.78     | -1.55      | -0.68      | -1.47 | -1.35 | -1    | -0.94 | -0.32 | -0.62 | -0.62 | -0.51 | -0.34 |       |    |
| GENE336X | 14484_at   | 14484_at   | 1     | -3.64 | -3.32 | -3.64 | -3.83 | -2.32 | -1.64 | -     |       |       |    |
| 3.47     | -3.47      | -1.18      | -2.18 | -1.55 | -1.69 | -2    | -3.47 | -2.32 | -0.83 | -0.71 | -1.25 | -1.55 | -  |
| 0.68     | -1.78      | -0.83      | -3.32 | -3.32 | -1.39 | -0.86 | -1.05 | -0.13 | 0.21  | -0.51 | 0.49  |       |    |
| GENE335X | 20257_at   | 20257_at   | 1     | -4.05 | -2.47 | -4.32 | -5.05 | -2.55 | -2.12 | -     |       |       |    |
| 3.83     | -2.47      | -0.32      | -2.47 | -0.83 | -1.88 | -1.51 | -1.88 | -2.64 | -0.64 | -0.37 | -0.88 | -0.94 | -  |
| 1.15     | -1.51      | -1.12      | -2.73 | -1.78 | -1.21 | -0.43 | -0.39 | -0.2  | -0.45 | -0.26 | 0.02  |       |    |
| GENE334X | 14509_g_at | 14509_g_at | 1     | -4.05 | -2.39 | -4.32 | -4.64 | -3.32 | -2.47 | -     |       |       |    |
| 3.64     | -3.83      | -0.78      | -2.73 | -1.51 | -2    | -1.55 | -2.25 | -3.64 | -1.25 | -0.62 | -1.32 | -1.18 | -  |
| 0.64     | -2.39      | -1.05      | -2.55 | -2    | -0.78 | -0.86 | -0.18 | -0.37 | -0.39 | -0.23 | 0.09  |       |    |
| GENE364X | 18616_at   | 18616_at   | 1     | -1.25 | -0.62 | -1.59 | -2.05 | -1.02 | -1    | -     |       |       |    |
| 1.15     | -1.21      | -0.71      | -0.66 | -0.57 | -0.41 | -0.53 | -1    | -0.97 | 0     | -0.2  | -0.71 | -1.15 | -  |
| 0.53     | -1.05      | -0.49      | -0.49 | -0.37 | 0.09  | 0.02  | 0.08  | -0.3  | -0.18 | -0.08 | 0     |       |    |
| GENE363X | 16977_at   | 16977_at   | 1     | -1.32 | -0.73 | -1.69 | -1.83 | -0.86 | -1.08 | -     |       |       |    |
| 0.97     | -0.94      | -0.02      | -0.76 | -0.47 | -1.05 | -0.91 | -0.71 | -1.12 | -0.28 | -0.18 | -0.71 | -0.83 | -  |
| 0.57     | -1.28      | -0.34      | -0.88 | -0.47 | 0.08  | 0.15  | -0.1  | -0.13 | -0.2  | 0.17  | 0.08  |       |    |

|          |            |            |       |       |       |       |       |       |       |       |       |       |   |
|----------|------------|------------|-------|-------|-------|-------|-------|-------|-------|-------|-------|-------|---|
| GENE362X | 17943_at   | 17943_at   | 1     | -2.32 | -1.35 | -1.73 | -2.64 | -1.51 | -1.73 | -     |       |       |   |
| 1.83     | -1.64      | -0.16      | -0.81 | -1    | -1.25 | -1.51 | -1.69 | -1.32 | -0.88 | -0.47 | -1.12 | -1.39 | - |
| 0.53     | -1.55      | -0.21      | -1.25 | -0.88 | -0.51 | -0.55 | -0.51 | -0.64 | -0.59 | -0.18 | -0.25 | -     |   |
| GENE361X | 17254_at   | 17254_at   | 1     | -3.64 | -1.64 | -2.73 | -4.64 | -3.18 | -2.18 | -     |       |       |   |
| 2.05     | -2         | -0.25      | -1.64 | -1.39 | -1.47 | -1.64 | -1.55 | -2.39 | -1.15 | -1.08 | -2.18 | -1.64 | - |
| 1.55     | -2.47      | -0.94      | -2.12 | -1.59 | -0.71 | -0.15 | -0.2  | -0.41 | -0.3  | -0.26 | -0.26 | -     |   |
| GENE352X | 18475_at   | 18475_at   | 1     | -2    | -1.32 | -1.28 | -1.28 | -1.02 | -1.02 | -     |       |       |   |
| 1.28     | -1.32      | -0.23      | -0.62 | -0.23 | -0.76 | -0.71 | -1.08 | -1.05 | -0.21 | -0.71 | -0.41 | -0.81 | - |
| 0.68     | -0.91      | -0.62      | -0.91 | -0.64 | -0.51 | -0.35 | 0.26  | -0.32 | 0.02  | -0.21 | -0.28 | -     |   |
| GENE351X | 17573_at   | 17573_at   | 1     | -2.94 | -1.64 | -2.73 | -1.88 | -1.59 | -2.25 | -     |       |       |   |
| 1.73     | -2.18      | -1         | -1.05 | -0.78 | -1.94 | -1.59 | -1.73 | -1.55 | -1.12 | -0.78 | -1.08 | -1.64 | - |
| 0.88     | -1.64      | -1.32      | -0.97 | -0.64 | -0.39 | -0.34 | -0.41 | -0.23 | -0.3  | -0.04 | -0.49 | -     |   |
| GENE350X | 12312_at   | 12312_at   | 1     | -5.05 | -3.64 | -5.05 | -3.18 | -3.64 | -3.32 | -     |       |       |   |
| 3.18     | -3.32      | -1.05      | -2.64 | -1.64 | -2.32 | -1.51 | -3.83 | -3.05 | -0.59 | -1.15 | -2    | -1.64 | - |
| 1.18     | -2.55      | -2         | -1.55 | -1    | -0.41 | -0.43 | -0.28 | -0.35 | -0.51 | 0.43  | 0.22  | -     |   |
| GENE461X | 12860_s_at | 12860_s_at | 1     | -1.94 | -1.59 | -1.25 | -1.94 | -1.47 | -0.97 | -     |       |       |   |
| 1.64     | -1.73      | -0.39      | -0.66 | -0.28 | -0.43 | -0.97 | -1.08 | -0.59 | -0.43 | -0.47 | -0.21 | -0.37 | - |
| 1.02     | -0.66      | -0.25      | -0.49 | -0.45 | -0.15 | 0.22  | -0.25 | -0.1  | 0.02  | -0.18 | -0.28 | -     |   |
| GENE329X | 14634_s_at | 14634_s_at | 1     | -2.73 | -3.18 | -3.32 | -3.47 | -3.05 | -2.47 | -     |       |       |   |
| 4.32     | -3.05      | -0.39      | -1.59 | -0.97 | -1.83 | -1.78 | -2.32 | -1.83 | -0.35 | -0.83 | -0.68 | -0.68 | - |
| 1.55     | -0.91      | -1         | -1.35 | -1.18 | -0.66 | -0.81 | -0.08 | 0.07  | 0     | -0.05 | -1.35 | -     |   |
| GENE95X  | 13160_at   | 13160_at   | 1     | -2.18 | -1.94 | -2.73 | -2.18 | -2    | -2.32 | -     |       |       |   |
| 2.83     | -3.05      | -0.35      | -1.21 | -0.37 | -0.94 | -1.18 | -2.32 | -1.39 | -0.3  | -0.86 | -0.71 | -1.08 | - |
| 1.51     | -1.28      | -0.57      | -1.73 | -1.21 | -0.55 | -0.62 | -0.49 | -0.21 | -0.08 | -0.37 | -0.32 | -     |   |
| GENE94X  | 13573_at   | 13573_at   | 1     | -2.47 | -1.94 | -2.83 | -2.94 | -2.64 | -2.94 | -     |       |       |   |
| 3.05     | -3.05      | -1.05      | -1.35 | -0.47 | -1.32 | -1.28 | -2.12 | -1.43 | -0.34 | -0.47 | -0.73 | -1.02 | - |
| 1.55     | -1.32      | -0.94      | -1.32 | -1.12 | -0.37 | -0.55 | -0.05 | 0.07  | 0.13  | -0.34 | -0.1  | -     |   |
| GENE325X | 18025_at   | 18025_at   | 1     | -2.05 | -2    | -2    | -2.94 | -1.94 | -2.05 | -     |       |       |   |
| 1.88     | -2         | -0.47      | -1.25 | -0.64 | -1.12 | -1.02 | -1.43 | -1.51 | -0.43 | -0.45 | -0.71 | -1.08 | - |
| 1.05     | -1.25      | -0.91      | -1.25 | -1.28 | -0.81 | -0.39 | -0.25 | -0.16 | -0.1  | -0.23 | -0.32 | -     |   |
| GENE91X  | 13492_at   | 13492_at   | 1     | -3.32 | -3.18 | -3.47 | -5.05 | -3.32 | -3.05 | -     |       |       |   |
| 4.32     | -3.18      | -0.91      | -1.51 | -0.91 | -1.88 | -1.64 | -2.25 | -1.69 | -1.05 | -1.47 | -1.35 | -1.59 | - |
| 1.73     | -2.18      | -1.28      | -2.12 | -1.73 | -1.05 | -1.18 | -1.35 | -0.47 | -0.21 | -0.49 | -0.45 | -     |   |
| GENE87X  | 12861_s_at | 12861_s_at | 1     | -2.94 | -2.47 | -2.73 | -3.05 | -2.39 | -2.32 | -     |       |       |   |
| 2.18     | -3.05      | -0.68      | -0.94 | -0.76 | -0.97 | -1.39 | -1.55 | -0.91 | -0.41 | -1.21 | -0.78 | -1.35 | - |
| 0.78     | -0.81      | -0.73      | -0.88 | -1.35 | -0.81 | -0.64 | -0.26 | 0.05  | 0.26  | -0.64 | -0.51 | -     |   |
| GENE242X | 18223_at   | 18223_at   | 1     | -1.39 | -1.35 | -1.35 | -1.51 | -1    | -1.08 | -     |       |       |   |
| 1.15     | -1.18      | 0.01       | -0.47 | -0.08 | -0.76 | -0.45 | -0.55 | -0.86 | -0.18 | -0.21 | -0.23 | -0.39 | - |
| 0.91     | -0.97      | -0.57      | -0.97 | -0.78 | -0.47 | -0.35 | -0.18 | -0.01 | 0.01  | -0.01 | -0.02 | -     |   |
| GENE157X | 18688_at   | 18688_at   | 1     | -1.69 | -1.43 | -1.88 | -2.32 | -1.59 | -1.73 | -     |       |       |   |
| 1.15     | -1.69      | -0.47      | -0.51 | -0.05 | -0.62 | -0.53 | -0.88 | -0.78 | -0.13 | -0.49 | -0.25 | -0.76 | - |
| 1.12     | -0.91      | -0.78      | -1.21 | -1.02 | -0.35 | -0.51 | -0.15 | -0.04 | 0.05  | -0.04 | -0.18 | -     |   |
| GENE93X  | 18009_s_at | 18009_s_at | 1     | -1.55 | -1.73 | -1.35 | -1.83 | -1.55 | -1.47 | -     |       |       |   |
| 1.69     | -1.73      | -0.59      | -0.57 | -0.28 | -0.62 | -0.71 | -1.02 | -1    | -0.12 | -0.37 | -0.57 | -0.47 | - |
| 1.32     | -0.81      | -1.05      | -0.83 | -0.86 | -0.43 | -0.05 | -0.12 | -0.16 | -0.41 | -0.07 | -0.35 | -     |   |
| GENE161X | 12914_s_at | 12914_s_at | 1     | -2    | -1.05 | -1.28 | -1.59 | -1.51 | -1.25 | -     |       |       |   |
| 1.73     | -1.28      | -0.49      | -0.57 | -0.53 | -0.55 | -0.91 | -0.49 | -0.88 | -0.15 | 0.07  | -0.32 | -0.66 | - |
| 0.83     | -0.88      | -0.73      | -1.21 | -1.08 | -0.66 | -0.37 | -0.01 | -0.05 | -0.1  | 0.15  | 0.11  | -     |   |
| GENE160X | 16682_at   | 16682_at   | 1     | -1.83 | -1.28 | -1.64 | -2.12 | -1.51 | -1.28 | -     |       |       |   |
| 1.78     | -1.78      | -0.34      | -0.49 | -0.68 | -0.64 | -0.53 | -0.88 | -0.97 | -0.1  | -0.1  | -0.86 | -0.91 | - |
| 0.62     | -0.78      | -0.55      | -1.51 | -1.39 | -1.02 | -0.3  | -0.25 | 0.01  | -0.18 | -0.07 | -0.04 | -     |   |
| GENE159X | 15685_s_at | 15685_s_at | 1     | -3.18 | -2    | -2.64 | -3.47 | -2.94 | -2.64 | -     |       |       |   |
| 3.05     | -3.64      | -0.78      | -1.12 | -0.86 | -1.18 | -1    | -1.94 | -1.55 | -0.08 | -0.18 | -0.86 | -0.86 | - |
| 1.39     | -1.28      | -1.47      | -2.05 | -2.32 | -1.32 | -0.66 | -0.28 | -0.18 | -0.39 | -0.07 | -0.15 | -     |   |
| GENE194X | 13607_at   | 13607_at   | 1     | -1.18 | -1.18 | -1.51 | -1.55 | -0.68 | -0.97 | -     |       |       |   |
| 1.39     | -1.05      | -0.35      | -0.43 | -0.43 | -0.26 | -0.39 | -0.37 | -0.59 | -0.16 | -0.32 | -0.51 | -0.25 | - |
| 0.3      | -0.53      | -0.53      | -0.83 | -0.51 | -0.28 | -0.3  | -0.12 | -0.07 | -0.16 | 0.08  | -0.12 | -     |   |

|           |            |            |       |       |       |       |       |       |       |       |       |       |    |
|-----------|------------|------------|-------|-------|-------|-------|-------|-------|-------|-------|-------|-------|----|
| GENE193X  | 14124_s_at | 14124_s_at | 1     | -2.18 | -2.47 | -3.18 | -2.83 | -2.05 | -2.55 | -     |       |       |    |
| 2.25      | -2.25      | -0.64      | -1.15 | -0.86 | -1.21 | -1.15 | -0.91 | -1.69 | -0.64 | -0.35 | -0.88 | -0.73 | -1 |
|           | -1.32      | -0.71      | -1.47 | -1.02 | -0.83 | -0.34 | -0.49 | -0.16 | -0.55 | 0     | -0.02 |       |    |
| GENE192X  | 15006_at   | 15006_at   | 1     | -2.12 | -2.12 | -2.55 | -2.64 | -2.25 | -2.12 | -     |       |       |    |
| 1.83      | -2.18      | -0.71      | -0.91 | -0.68 | -0.88 | -0.81 | -0.86 | -1.35 | -0.47 | -0.53 | -0.53 | -0.64 | -  |
| 0.64      | -1.21      | -0.86      | -1.51 | -1.35 | -0.73 | -0.55 | -0.34 | -0.34 | -0.26 | -0.23 | -0.16 |       |    |
| GENE46X   | 20468_at   | 20468_at   | 1     | -2.64 | -2.83 | -3.18 | -4.32 | -3.47 | -3.32 | -     |       |       |    |
| 2.94      | -2.64      | -1.15      | -1.25 | -1.28 | -1.47 | -1.69 | -1.59 | -1.59 | -0.78 | -0.39 | -1.35 | -0.78 | -  |
| 0.88      | -1.64      | -1.88      | -2.47 | -2    | -0.91 | -0.2  | 0.15  | -0.41 | -0.3  | 0.41  | -0.12 |       |    |
| GENE45X   | 19197_at   | 19197_at   | 1     | -3.18 | -2.83 | -3.32 | -4.64 | -3.32 | -2.94 | -     |       |       |    |
| 3.18      | -2.73      | -0.16      | -1.18 | -1.25 | -1.64 | -1.39 | -1.78 | -1.51 | -0.68 | -0.62 | -1.08 | -1.39 | -  |
| 1.18      | -1.43      | -1.18      | -1.83 | -1.69 | -0.83 | -0.49 | 0.33  | -0.21 | -0.07 | 0.04  | -0.43 |       |    |
| GENE44X   | 13482_at   | 13482_at   | 1     | -3.32 | -2.73 | -4.32 | -4.64 | -4.05 | -3.05 | -     |       |       |    |
| 3.47      | -3.05      | -0.97      | -1.25 | -0.83 | -2.18 | -1.47 | -2.12 | -1.55 | -0.35 | -0.62 | -1.28 | -1.18 | -  |
| 1.51      | -1.83      | -1.51      | -2.32 | -1.78 | -0.97 | -0.68 | -0.37 | -0.32 | -0.35 | -0.12 | -0.37 |       |    |
| GENE98X   | 14501_at   | 14501_at   | 1     | -0.91 | -0.94 | -1.25 | -1.47 | -0.78 | -0.88 | -     |       |       |    |
| 1.28      | -1.28      | -0.32      | -0.62 | -0.26 | -0.35 | -0.32 | -0.76 | -0.51 | 0.12  | -0.35 | -0.41 | -0.51 | -1 |
|           | -0.62      | -0.45      | -0.66 | -0.59 | -0.15 | -0.59 | -0.32 | -0.21 | -0.25 | -0.34 | -0.2  |       |    |
| GENE97X   | 17931_at   | 17931_at   | 1     | -1.88 | -1.88 | -2    | -2.18 | -2.12 | -2.18 | -2    |       |       |    |
|           | -1.88      | -0.71      | -0.83 | -0.97 | -0.91 | -0.97 | -1.47 | -1.08 | -0.64 | -0.66 | -0.94 | -1.12 | -  |
| 1.43      | -1.25      | -1.25      | -0.94 | -0.94 | -0.57 | -0.78 | -0.49 | -0.71 | -0.88 | -0.37 | -0.47 |       |    |
| GENE96X   | 19125_s_at | 19125_s_at | 1     | -2.05 | -1.88 | -2.39 | -3.05 | -2.12 | -2.32 | -     |       |       |    |
| 2.25      | -2.55      | -0.66      | -1.39 | -0.94 | -0.88 | -0.86 | -1.73 | -1.73 | -0.55 | -0.18 | -1.15 | -1.78 | -  |
| 1.43      | -2.12      | -1.83      | -1.88 | -1.28 | -0.3  | -0.83 | -0.35 | -0.45 | -0.59 | -0.37 | -0.41 |       |    |
| GENE1035X | 12410_g_at | 12410_g_at | 1     | -0.94 | 0.09  | -0.55 | -1.12 | -0.59 | -0.51 | -     |       |       |    |
| 0.21      | -0.64      | -0.47      | -0.49 | -0.66 | 0.05  | 0.05  | -0.43 | -0.64 | -0.15 | -0.04 | -0.43 | -0.59 | -  |
| 0.05      | -0.21      | -0.32      | -1.18 | -1.08 | -0.88 | -0.05 | 0.33  | 0.09  | 0.16  | -0.51 | -0.53 |       |    |
| GENE1034X | 18647_at   | 18647_at   | 1     | -1.18 | -0.35 | -0.53 | -1.18 | -0.53 | -1.47 | -1    |       |       |    |
|           | -1.15      | -0.21      | -0.71 | -0.86 | -1.35 | -0.21 | -1.64 | -1.05 | -0.73 | -0.28 | -0.59 | -0.71 | -  |
|           | 0.41       | -0.86      | -0.37 | -1.08 | -1.21 | -0.62 | -0.2  | 0.29  | -0.08 | -0.08 | -0.23 | 0.04  |    |
| GENE1033X | 12181_at   | 12181_at   | 1     | -1.43 | -0.1  | 0.27  | -0.47 | -0.81 | -1    | -     |       |       |    |
| 0.1       | -0.78      | -0.21      | -0.81 | -0.25 | -0.35 | -0.2  | -0.97 | -0.73 | -0.59 | -0.15 | -0.43 | -0.35 | -  |
| 0.39      | -1.05      | -0.66      | -1.21 | -0.86 | -0.35 | 0.38  | 0.22  | -0.2  | -0.13 | 0.17  | 0.15  |       |    |
| GENE1020X | 19391_at   | 19391_at   | 1     | -1.35 | -0.59 | -0.35 | -0.91 | -0.86 | -0.86 | -     |       |       |    |
|           | 0.17       | 0.08       | -1.43 | -0.43 | -0.76 | -0.13 | -0.47 | -0.21 | -0.88 | -1.55 | -1.47 | -0.91 | -  |
| 0.97      | -0.78      | -0.71      | -0.43 | -0.41 | -0.68 | -0.45 | -0.08 | -0.07 | -0.2  | 0.11  | -0.66 | -0.78 | -  |
| GENE527X  | 20290_s_at | 20290_s_at | 1     | -2.73 | -1.88 | -1.12 | -2.18 | -0.83 | -1.59 | -     |       |       |    |
| 0.18      | -0.68      | -0.71      | -0.62 | -0.3  | -0.47 | -0.55 | 0.51  | -0.41 | -1.05 | -1.73 | -0.59 | -0.97 | -  |
| 0.86      | -0.94      | -0.45      | -1.12 | -0.88 | -0.25 | 0.17  | 0.09  | -0.2  | 0.16  | -0.3  | -0.34 |       |    |
| GENE1037X | 20149_at   | 20149_at   | 1     | -0.64 | -0.55 | 0.05  | -0.53 | -0.21 | -1.18 | -     |       |       |    |
|           | 0.12       | -0.73      | -0.55 | -0.32 | -0.39 | -0.94 | -0.43 | -0.62 | -0.68 | -0.51 | -0.05 | -0.64 | -  |
| 0.83      | -0.34      | -0.34      | -0.86 | -0.51 | -0.34 | -0.57 | -0.18 | 0.38  | 0.2   | 0     | -0.3  | -0.1  | -  |
| GENE1036X | 14717_s_at | 14717_s_at | 1     | -0.76 | -1.28 | -0.68 | -0.57 | -0.43 | -1.59 | -     |       |       |    |
| 0.13      | -0.76      | -0.26      | -0.26 | -0.43 | -0.68 | -0.59 | -0.55 | -0.64 | -0.57 | -0.64 | -0.47 | -1.18 | -  |
| 1.39      | -0.86      | -0.78      | -0.94 | -1    | -0.73 | -0.26 | -0.07 | 0.15  | 0.09  | -0.57 | -0.64 |       |    |
| GENE1018X | 12095_at   | 12095_at   | 1     | -2    | -0.94 | -1.08 | -0.49 | -2.47 | -2.64 | -     |       |       |    |
| 1.18      | -0.78      | -1.83      | -0.26 | -1.64 | -1.05 | -1.47 | -1.18 | -1.64 | -1.88 | -0.97 | -1.83 | -1.35 | -  |
| 1.12      | -1.69      | -2.18      | -1.78 | -2.32 | -2.12 | -1.64 | -0.86 | -0.16 | -0.2  | -0.81 | -0.55 |       |    |
| GENE500X  | 12561_at   | 12561_at   | 1     | -1.73 | -1.15 | -0.04 | -0.94 | -1.47 | -2.73 | -     |       |       |    |
| 0.35      | -1.25      | -1         | -1.05 | -0.41 | -1.32 | -0.97 | -0.81 | -1    | -0.51 | -0.68 | -0.83 | -0.94 | -  |
| 0.2       | -0.64      | -2         | -1.12 | -0.91 | -0.35 | -0.51 | -1.08 | -0.51 | -0.49 | 0.17  | 0.31  |       |    |
| GENE499X  | 20256_s_at | 20256_s_at | 1     | -1.51 | -1.47 | -0.73 | -1.08 | -1.47 | -2.39 | -     |       |       |    |
| 0.53      | -1.78      | -0.91      | -0.76 | -0.47 | -0.81 | -1.05 | -0.91 | -0.47 | -0.59 | -1.02 | -0.78 | -1.18 | -  |
| 0.68      | -0.64      | -1.43      | -1.39 | -1.15 | -0.94 | -0.88 | -0.55 | -0.55 | -0.01 | -0.43 | -0.3  |       |    |
| GENE498X  | 12608_i_at | 12608_i_at | 1     | -3.47 | -1.78 | -1.39 | -2.94 | -2.94 | -2.94 | -     |       |       |    |
| 1.15      | -1.15      | -1.73      | -1.39 | -2.05 | -2.83 | -2.32 | -1.15 | -1.39 | -1.83 | -1.47 | -2.25 | -2.64 | -  |
| 0.68      | -3.18      | -2.39      | -2.18 | -1.35 | -0.18 | -0.05 | -0.97 | -0.97 | -0.86 | 0.5   | 0.05  |       |    |



|           |            |            |       |       |       |       |       |       |       |       |       |       |   |
|-----------|------------|------------|-------|-------|-------|-------|-------|-------|-------|-------|-------|-------|---|
| GENE497X  | 13322_at   | 13322_at   | 1     | -4.05 | -4.05 | -2.94 | -3.47 | -3.83 | -3.83 | -     |       |       |   |
| 2.83      | -2.83      | -1.35      | -2.94 | -3.18 | -4.05 | -4.05 | -2.83 | -2.94 | -1.73 | -1.39 | -2.83 | -1.78 | - |
| 1.47      | -3.32      | -3.83      | -3.83 | -1.47 | -0.64 | -1.39 | -1    | -0.76 | -1.08 | 0.46  | -0.13 |       |   |
| GENE1094X | 15343_at   | 15343_at   | 1     | -0.81 | -0.57 | -0.32 | -0.59 | -0.81 | -0.83 | -     |       |       |   |
| 1.55      | -1.15      | -0.73      | -0.35 | -0.55 | -0.28 | -0.28 | -1.73 | 0.2   | -0.81 | -0.3  | -1.05 | -0.13 | - |
| 0.13      | -0.21      | -0.43      | -0.78 | -0.34 | -0.37 | 0.08  | 0.4   | -0.32 | -0.12 | -0.12 | 0.13  |       |   |
| GENE504X  | 20412_at   | 20412_at   | 1     | -0.91 | -0.53 | 0.62  | -0.78 | -0.94 | -1.08 | -     |       |       |   |
| 1.59      | -0.83      | -1.39      | -0.35 | -0.91 | -0.41 | -0.32 | -0.66 | -0.15 | -0.53 | -0.66 | -1.59 | -0.86 | - |
| 0.28      | -0.86      | -1.15      | -0.15 | -0.23 | 0.33  | -0.2  | -0.57 | -0.34 | -0.62 | 0.09  | -0.32 |       |   |
| GENE503X  | 14028_at   | 14028_at   | 1     | -1.35 | -1.21 | -0.51 | -1.43 | -1.55 | -1.64 | -     |       |       |   |
| 0.49      | -0.49      | -0.97      | -0.64 | -1.39 | -0.76 | -0.47 | -0.97 | 0.9   | -0.81 | -1.51 | -0.73 | -0.76 | - |
| 0.26      | -0.43      | -0.73      | -1.73 | -0.12 | -0.3  | -0.35 | -0.97 | -0.83 | -0.32 | 0.79  | 0.61  |       |   |
| GENE400X  | 19961_at   | 19961_at   | 1     | -0.97 | -0.34 | -0.73 | -0.35 | -0.83 | -0.76 | -     |       |       |   |
| 1.69      | -0.51      | -0.51      | -0.28 | -0.08 | -0.32 | -0.43 | -0.57 | -0.45 | -0.64 | -0.04 | -0.81 | -0.45 | - |
| 0.28      | -0.57      | -0.83      | -0.39 | -0.23 | -0.01 | -0.86 | -0.37 | -0.15 | -0.16 | 0.17  | 0.15  |       |   |
| GENE399X  | 18977_at   | 18977_at   | 1     | -0.15 | -0.51 | -1.51 | -1.12 | -0.88 | -2    | -     |       |       |   |
| 1.78      | -1         | -0.57      | -0.76 | -0.59 | -0.68 | -0.94 | -0.86 | -0.86 | -0.18 | 0.48  | -1.12 | -1.08 | - |
| 0.21      | -0.94      | -2.64      | -1    | -0.32 | -0.91 | -1.69 | -0.57 | -0.53 | -0.32 | -0.43 | 0     |       |   |
| GENE398X  | 14371_at   | 14371_at   | 1     | -0.66 | -0.3  | -0.81 | -1.08 | -1.18 | -0.73 | -     |       |       |   |
| 1.02      | -1.08      | -0.51      | -1.18 | -0.55 | -0.73 | -0.57 | -0.91 | -0.73 | -0.28 | -0.35 | -1    | -0.55 | - |
| 0.15      | -0.57      | -0.18      | -0.21 | -0.08 | 0     | -0.41 | -0.57 | -0.32 | -0.12 | -0.32 | -0.18 |       |   |
| GENE397X  | 12195_at   | 12195_at   | 1     | -0.53 | -0.43 | -0.91 | -1.15 | -1.32 | -1.39 | -     |       |       |   |
| 0.81      | -1.12      | -0.86      | -0.83 | -0.78 | -1.21 | -0.47 | -1.05 | -0.88 | -0.76 | -0.15 | -1.15 | -1.02 | - |
| 0.41      | -0.88      | -0.78      | -0.23 | 0     | 0.23  | -0.32 | -1.51 | -0.34 | -0.55 | -0.35 | -0.34 |       |   |
| GENE396X  | 19949_at   | 19949_at   | 1     | -0.28 | 0.12  | -0.76 | -1.32 | -1.32 | -0.91 | -     |       |       |   |
| 1.32      | -1.18      | -0.81      | -0.91 | -1.32 | -0.76 | -0.18 | -0.86 | -0.83 | -0.76 | -0.71 | -1.32 | -1.18 | - |
| 0.28      | -1.12      | -1.39      | -0.39 | 0.02  | -0.35 | -1.21 | -0.41 | -0.39 | -0.41 | -0.45 | -0.34 |       |   |
| GENE395X  | 18031_r_at | 18031_r_at | 1     | -2.05 | -0.78 | -2.12 | -1.94 | -1.59 | -2.39 | -     |       |       |   |
| 1.12      | -1.73      | -1.73      | -1.94 | -1.43 | -0.94 | -1.28 | -1.28 | -1.88 | -0.88 | -0.37 | -1.55 | -1.88 | - |
| 1.39      | -1.73      | -1.43      | -0.81 | -0.62 | 0.16  | -0.88 | -0.66 | -0.21 | -0.05 | -0.76 | -0.37 |       |   |
| GENE394X  | 18030_i_at | 18030_i_at | 1     | -1.64 | -0.57 | -2.73 | -1.88 | -1.78 | -2.83 | -     |       |       |   |
| 1.73      | -2.39      | -1.55      | -3.18 | -1.21 | -0.64 | -0.83 | -1.55 | -2    | -0.86 | -0.53 | -1.64 | -2.18 | - |
| 1.64      | -2         | -1.64      | -0.59 | -0.64 | 0.11  | -0.97 | -0.64 | -0.34 | -0.13 | -1    | -0.23 |       |   |
| GENE393X  | 19880_at   | 19880_at   | 1     | -1.55 | -0.97 | -1.88 | -2    | -1.94 | -2.83 | -     |       |       |   |
| 0.86      | -1         | -1.35      | -1.78 | -1.64 | -0.86 | -1.12 | -1.39 | -1.28 | -1.73 | -1.47 | -1.35 | -2.55 | - |
| 1.43      | -0.81      | -2.32      | -0.76 | -0.18 | 0.09  | -1.25 | -1.35 | -0.12 | -0.35 | -1.21 | -0.64 |       |   |
| GENE638X  | 15402_at   | 15402_at   | 1     | -0.59 | -0.59 | -0.78 | -1.28 | -1.35 | -0.86 | -     |       |       |   |
| 0.64      | -0.73      | -0.91      | -0.18 | -0.55 | -0.16 | -0.16 | -0.59 | -0.21 | -0.26 | 0.11  | -0.59 | -0.78 | - |
| 0.41      | -0.66      | -0.59      | -0.81 | -0.81 | -0.39 | 0.27  | -1.02 | -0.07 | -0.04 | -0.3  | -0.26 |       |   |
| GENE637X  | 13252_s_at | 13252_s_at | 1     | -1    | -1.83 | -1.18 | -1.28 | -2.12 | -1.12 | -     |       |       |   |
| 1.18      | -1.05      | -0.49      | -0.73 | -0.68 | -1    | -1.18 | -0.81 | -0.18 | 0.73  | 1.04  | -1.32 | -1.73 | - |
| 0.62      | -1.69      | -1.32      | -1.32 | -0.86 | -0.57 | -0.49 | -0.57 | -0.39 | -0.05 | -0.04 | -0.25 |       |   |
| GENE289X  | 19008_s_at | 19008_s_at | 1     | -0.53 | -1    | -2.73 | -3.47 | -3.32 | -2.94 | -     |       |       |   |
| 2.73      | -1.64      | -0.83      | -1.25 | -0.71 | -1.73 | -0.88 | -1.12 | -1.25 | 0.51  | 0.48  | -0.59 | -0.91 | - |
| 0.91      | -1.18      | -1.73      | -1.94 | -0.91 | -0.88 | -1.32 | 0     | -0.07 | -0.34 | -0.45 | -0.23 |       |   |
| GENE288X  | 17823_s_at | 17823_s_at | 1     | -2.18 | -0.94 | -2.18 | -3.05 | -4.64 | -3.18 | -     |       |       |   |
| 3.47      | -2.25      | -0.97      | -0.78 | -0.35 | -2    | -0.73 | -2.83 | -1.08 | -0.2  | -0.57 | 0.04  | -1.12 | - |
| 0.47      | -1.18      | -1.64      | -1.78 | -1.35 | -1.15 | -1.21 | -0.25 | -0.41 | -0.47 | -0.13 | 0.26  |       |   |
| GENE115X  | 16502_at   | 16502_at   | 1     | -2.64 | -2.12 | -3.64 | -3.83 | -2.94 | -2.83 | -     |       |       |   |
| 4.05      | -2.94      | -0.28      | -0.73 | -0.86 | -0.91 | -0.88 | -1.88 | -0.97 | -0.51 | -0.2  | -1.12 | -1.73 | - |
| 1.32      | -1.73      | -1.51      | -2.18 | -1.94 | -1.21 | -0.71 | -0.81 | -0.41 | -0.47 | -0.57 | -0.51 |       |   |
| GENE114X  | 18343_at   | 18343_at   | 1     | -2.73 | -1.88 | -3.47 | -4.05 | -3.47 | -2.39 | -     |       |       |   |
| 4.05      | -2.39      | -0.71      | -1.21 | -0.86 | -0.88 | -0.62 | -1.78 | -1.39 | -0.34 | -0.15 | -1.08 | -1.55 | - |
| 1.02      | -1.59      | -1.69      | -2.32 | -2    | -0.94 | -1.15 | -0.64 | -0.15 | -0.12 | -0.68 | -0.43 |       |   |
| GENE113X  | 15303_at   | 15303_at   | 1     | -2.47 | -2.05 | -3.64 | -3.32 | -3.64 | -3.32 | -     |       |       |   |
| 4.32      | -2.64      | -0.88      | -1.32 | -1.12 | -1    | -0.78 | -1.73 | -1.55 | -0.16 | -0.25 | -1.28 | -1.28 | - |
| 0.78      | -1.39      | -1.28      | -2.55 | -2.12 | -1.51 | -0.86 | -0.73 | -0.32 | -0.51 | -0.35 | -0.12 |       |   |

|          |            |            |       |       |       |       |       |       |       |       |       |       |       |    |
|----------|------------|------------|-------|-------|-------|-------|-------|-------|-------|-------|-------|-------|-------|----|
| GENE112X | 16385_s_at | 16385_s_at | 1     | -2.18 | -1.73 | -2.73 | -3.05 | -3.18 | -2.94 | -     |       |       |       |    |
|          | 2.73       | -2.39      | -0.71 | -1.18 | -0.88 | -1.05 | -0.94 | -1.83 | -1.51 | -0.39 | -0.21 | -1    | -1.83 | -  |
|          | 0.86       | -1.15      | -1    | -1.94 | -1.83 | -1.05 | -1.21 | -0.25 | -0.02 | 0.35  | -0.66 | -0.51 |       |    |
| GENE111X | 12910_s_at | 12910_s_at | 1     | -2.94 | -2.32 | -3.05 | -3.47 | -3.32 | -2.83 | -     |       |       |       |    |
|          | 2.94       | -2.73      | -0.94 | -1.55 | -0.83 | -1.25 | -1.32 | -1.73 | -1.73 | -0.57 | -0.76 | -0.88 | -1.64 | -  |
|          | 1.51       | -1.05      | -1.21 | -2.05 | -2    | -1.15 | -0.97 | -0.28 | 0.04  | 0.46  | -0.68 | -0.64 |       |    |
| GENE110X | 19545_at   | 19545_at   | 1     | -1.78 | -2.12 | -2.94 | -2.94 | -3.05 | -2.94 | -     |       |       |       |    |
|          | 2.64       | -2.32      | -1.12 | -0.83 | -0.66 | -1.02 | -0.94 | -1.12 | -0.91 | -0.21 | -0.43 | -0.71 | -0.71 | -  |
|          | 0.81       | -1.15      | -1.35 | -2.05 | -1.73 | -1    | -1.05 | -0.12 | -0.15 | -0.05 | -0.3  | -0.16 |       |    |
| GENE109X | 15837_at   | 15837_at   | 1     | -2.55 | -2.47 | -3.83 | -3.64 | -3.83 | -3.64 | -     |       |       |       |    |
|          | 3.64       | -3.64      | -1.39 | -1.05 | -0.83 | -0.64 | -0.94 | -1.69 | -1.39 | -0.37 | -0.28 | -1.39 | -1.18 | -  |
|          | 1.08       | -1.39      | -1.59 | -2.73 | -2.55 | -1.47 | -0.83 | -0.23 | -0.34 | -0.1  | -0.68 | -0.3  |       |    |
| GENE108X | 15769_at   | 15769_at   | 1     | -2.64 | -2.32 | -3.18 | -3.83 | -3.64 | -3.47 | -     |       |       |       |    |
|          | 2.55       | -2.83      | -1.02 | -0.97 | -1.05 | -1.08 | -1.25 | -2    | -1.35 | -0.62 | -0.47 | -1    | -1.55 | -1 |
|          |            | -1.83      | -1.88 | -2.73 | -2.73 | -0.91 | -0.94 | -0.39 | -0.49 | -0.12 | -0.78 | -0.13 |       |    |
| GENE73X  | 16802_s_at | 16802_s_at | 1     | -1.18 | -0.49 | -1.32 | -1.47 | -1.43 | -1.55 | -     |       |       |       |    |
|          | 1.51       | -1.28      | -0.64 | -0.59 | -0.28 | -0.59 | -0.59 | -1.15 | -0.83 | 0.04  | -0.08 | -0.45 | -0.64 | -  |
|          | 0.41       | -0.55      | -0.91 | -1.15 | -1.08 | -0.78 | -0.71 | -0.12 | -0.39 | -0.07 | -0.12 | 0.09  |       |    |
| GENE72X  | 18580_at   | 18580_at   | 1     | -1.28 | -0.64 | -1.35 | -1.35 | -1.64 | -1.59 | -     |       |       |       |    |
|          | 1.28       | -1.69      | -0.53 | -0.73 | -0.26 | -0.39 | -0.41 | -0.94 | -0.94 | -0.07 | -0.05 | -0.64 | -0.64 | -  |
|          | 0.41       | -0.78      | -0.81 | -1.08 | -1.02 | -0.57 | -0.59 | -0.41 | -0.18 | -0.08 | -0.39 | -0.08 |       |    |
| GENE71X  | 12348_at   | 12348_at   | 1     | -2.55 | -1.05 | -3.18 | -3.05 | -2.18 | -3.05 | -     |       |       |       |    |
|          | 3.05       | -2.64      | -0.71 | -1.39 | -0.97 | -1.25 | -0.91 | -1.73 | -2    | -0.45 | -0.39 | -1.39 | -1.05 | -  |
|          | 0.68       | -1.69      | -1.32 | -2.25 | -1.78 | -1.12 | -1    | -0.41 | -0.45 | -0.45 | -0.04 | 0.07  |       |    |
| GENE70X  | 19749_at   | 19749_at   | 1     | -2.39 | -1.51 | -3.18 | -3.32 | -3.18 | -2.47 | -     |       |       |       |    |
|          | 3.18       | -2.47      | -0.64 | -1.51 | -0.04 | -0.97 | -0.21 | -2.12 | -2.47 | 0.33  | -0.57 | -0.55 | -1.15 | -  |
|          | 0.71       | -1.28      | -1.43 | -2.05 | -1.94 | -1.73 | -1.47 | -0.37 | -0.08 | 0.09  | -0.55 | 0.05  |       |    |
| GENE168X | 13438_at   | 13438_at   | 1     | -1.88 | -1    | -1.88 | -2.32 | -1.94 | -2.12 | -     |       |       |       |    |
|          | 1.73       | -1.94      | -0.71 | -0.71 | -0.59 | -0.78 | -0.88 | -1.47 | -1.47 | -0.25 | -0.41 | -0.97 | -0.78 | -  |
|          | 0.45       | -0.81      | -0.91 | -1.39 | -1.18 | -0.78 | -0.64 | 0.25  | -0.13 | -0.04 | -0.3  | -0.12 |       |    |
| GENE68X  | 16480_at   | 16480_at   | 1     | -1.64 | -1.21 | -1.88 | -2.05 | -2.12 | -2    | -     |       |       |       |    |
|          | 2.12       | -2.05      | -0.73 | -0.53 | -0.51 | -0.78 | -0.91 | -1.43 | -1    | -0.41 | -0.12 | -0.66 | -0.41 | -  |
|          | 0.49       | -0.73      | -1.02 | -1.21 | -1.02 | -0.81 | -0.3  | 0.31  | 0.11  | 0.05  | -0.04 | -0.13 |       |    |
| GENE69X  | 13180_s_at | 13180_s_at | 1     | -1.43 | -0.86 | -2.12 | -2.18 | -1.88 | -1.94 | -2    |       |       |       |    |
|          |            | -1.83      | -0.73 | -0.51 | -0.43 | -0.71 | -0.83 | -1.32 | -0.97 | -0.16 | 0.01  | -0.62 | -0.76 | -  |
|          | 0.78       | -1.18      | -0.86 | -1.25 | -0.88 | -0.62 | -0.59 | 0.02  | -0.08 | 0.07  | -0.25 | 0     |       |    |
| GENE67X  | 12773_at   | 12773_at   | 1     | -1.39 | -1.55 | -2.18 | -2.25 | -2.18 | -1.88 | -     |       |       |       |    |
|          | 2.47       | -2.12      | -0.81 | -0.81 | -0.81 | -0.66 | -0.78 | -1.39 | -1.12 | -0.02 | 0.04  | -0.91 | -0.83 | -  |
|          | 0.55       | -0.78      | -1.15 | -1.05 | -1.02 | -0.83 | -0.57 | -0.16 | -0.43 | -0.39 | -0.43 | -0.18 |       |    |
| GENE66X  | 17568_at   | 17568_at   | 1     | -1.43 | -1.12 | -2.55 | -2.39 | -2.47 | -2.05 | -     |       |       |       |    |
|          | 2.25       | -2.12      | -0.76 | -0.81 | -0.53 | -0.55 | -0.37 | -1.55 | -1.18 | -0.12 | 0.02  | -0.73 | -0.71 | -  |
|          | 0.68       | -0.76      | -1.35 | -1.28 | -1.28 | -1.02 | -0.86 | -0.07 | -0.05 | -0.13 | -0.3  | -0.2  |       |    |
| GENE65X  | 14284_at   | 14284_at   | 1     | -1.55 | -1.69 | -2.73 | -3.32 | -2.12 | -2.47 | -     |       |       |       |    |
|          | 3.47       | -3.47      | -0.55 | -0.83 | -0.64 | -0.97 | -0.97 | -2    | -1.88 | -0.21 | -0.43 | -0.97 | -0.97 | -  |
|          | 0.97       | -0.64      | -1.15 | -1.69 | -1.47 | -1.21 | -0.53 | 0.27  | 0.01  | 0.13  | 0.02  | 0.05  |       |    |
| GENE64X  | 14961_at   | 14961_at   | 1     | -1.64 | -1.83 | -2.64 | -2.73 | -2.55 | -2.32 | -     |       |       |       |    |
|          | 2.73       | -3.83      | -1.12 | -1.25 | -0.62 | -1.51 | -1.18 | -2.12 | -1.51 | -0.16 | -0.41 | -1.21 | -0.64 | -  |
|          | 1.08       | -1.05      | -1.64 | -2    | -1.78 | -1.12 | -0.76 | -0.71 | -0.28 | -0.18 | -0.23 | 0     |       |    |
| GENE63X  | 17060_s_at | 17060_s_at | 1     | -2.12 | -2.05 | -3.64 | -3.18 | -2.73 | -2.47 | -     |       |       |       |    |
|          | 3.05       | -3.32      | -1    | -0.91 | -1.73 | -0.35 | -0.83 | -1.73 | -1.88 | -0.73 | -0.45 | -0.86 | -0.91 | -  |
|          | 0.26       | -1.55      | -0.91 | -1.21 | -2.25 | -1.94 | -1.05 | -0.39 | -0.25 | -0.32 | -0.37 | -0.08 |       |    |
| GENE62X  | 16214_at   | 16214_at   | 1     | -1.69 | -2    | -2.94 | -1.83 | -2.12 | -1.64 | -     |       |       |       |    |
|          | 3.05       | -2.47      | -1.12 | -2.12 | -0.86 | -1.25 | -0.86 | -1.78 | -1.78 | 0.12  | -0.15 | -1.05 | -0.71 | -  |
|          | 0.68       | -1.83      | -0.78 | -1.78 | -1.51 | -1    | -0.35 | 0.02  | 0.02  | 0.02  | 0.41  | 0.41  |       |    |
| GENE61X  | 13353_at   | 13353_at   | 1     | -1.83 | -1.69 | -2.25 | -3.32 | -2.73 | -2    | -     |       |       |       |    |
|          | 2.47       | -2.64      | -0.86 | -1.43 | -0.59 | -1.69 | -1.55 | -1.73 | -1.21 | -0.39 | -0.28 | -0.59 | -0.32 | -  |
|          | 0.68       | -1.18      | -0.81 | -1.73 | -1.83 | -0.76 | -0.43 | -0.1  | -0.3  | -0.32 | -0.13 | -0.02 |       |    |

|         |            |            |       |       |       |       |       |       |       |       |       |       |   |
|---------|------------|------------|-------|-------|-------|-------|-------|-------|-------|-------|-------|-------|---|
| GENE60X | 14312_at   | 14312_at   | 1     | -2.05 | -3.32 | -2.64 | -3.05 | -4.32 | -2.83 | -     |       |       |   |
| 3.64    | -3.64      | -1.21      | -1.47 | -1.02 | -1.73 | -2    | -2.18 | -1.32 | -0.28 | -0.43 | -1.12 | -1    | - |
| 1.12    | -2.05      | -1.35      | -3.32 | -2.47 | -1.28 | -0.97 | -0.21 | -0.66 | -0.62 | -0.37 | -0.37 |       |   |
| GENE59X | 16598_s_at | 16598_s_at | 1     | -1.64 | -1.21 | -3.05 | -2.25 | -2.39 | -2.47 | -2    |       |       |   |
| -2      | -1         | -0.66      | -0.88 | -0.88 | -1.12 | -1.12 | -1    | -0.35 | -0.81 | -0.91 | -0.71 | -     |   |
| 0.28    | -0.91      | -1.94      | -1.69 | -1.88 | -1    | -0.88 | 0.27  | -0.49 | -0.32 | 0.27  | 0.21  |       |   |
| GENE58X | 17536_at   | 17536_at   | 1     | -2.05 | -0.68 | -2.32 | -2.47 | -2.55 | -2.05 | -     |       |       |   |
| 1.73    | -1.51      | -0.78      | -0.66 | -0.68 | -0.62 | -0.68 | -1.12 | -0.91 | -0.47 | -0.49 | -0.62 | -0.91 | - |
| 0.59    | -0.97      | -0.91      | -1.59 | -1.69 | -0.86 | -0.86 | -0.47 | -0.1  | -0.16 | 0.09  | 0.25  |       |   |
| GENE57X | 15671_s_at | 15671_s_at | 1     | -1.73 | -1.12 | -1.94 | -2.64 | -2.18 | -1.88 | -     |       |       |   |
| 1.59    | -2.05      | -1.28      | -0.71 | -1.08 | -1.05 | -0.91 | -1.78 | -1    | -0.21 | -0.45 | -0.26 | -1.25 | - |
| 0.21    | -1.05      | -1.59      | -1.25 | -1.43 | -0.86 | -0.34 | -0.04 | -0.1  | -0.18 | -0.3  | -0.3  |       |   |
| GENE56X | 20467_at   | 20467_at   | 1     | -2.39 | -1.59 | -2.12 | -3.32 | -2.64 | -2.64 | -     |       |       |   |
| 2.25    | -2.39      | -1         | -0.81 | -0.97 | -0.88 | -1.05 | -1.64 | -1.51 | -0.73 | -1.21 | -1.15 | -1.28 | - |
| 0.76    | -1.05      | -1.51      | -1.73 | -1.73 | -0.94 | -0.66 | -0.68 | -0.25 | -0.23 | -0.43 | -0.25 |       |   |
| GENE55X | 18579_at   | 18579_at   | 1     | -2.73 | -1.47 | -3.18 | -3.47 | -2.83 | -3.83 | -     |       |       |   |
| 2.55    | -2.64      | -1.78      | -1.21 | -1.73 | -1.28 | -1.55 | -2.32 | -1.59 | -0.88 | -0.83 | -1.88 | -1.64 | - |
| 1.21    | -1.39      | -2         | -2    | -2.12 | -1.55 | -0.86 | -0.55 | -0.18 | -0.02 | -0.68 | -0.73 |       |   |
| GENE54X | 16593_at   | 16593_at   | 1     | -3.47 | -2.94 | -3.32 | -4.32 | -4.05 | -4.64 | -     |       |       |   |
| 3.18    | -3.32      | -1.83      | -1.88 | -1.39 | -1.69 | -1.55 | -2.64 | -1.73 | -1.18 | -0.94 | -1.21 | -1.32 | - |
| 1.64    | -2.18      | -3.18      | -2.32 | -2    | -0.91 | -1.25 | 0     | -0.59 | -0.59 | -0.47 | -0.35 |       |   |
| GENE53X | 19017_at   | 19017_at   | 1     | -2.94 | -2.73 | -3.32 | -3.64 | -4.05 | -4.05 | -     |       |       |   |
| 4.32    | -3.83      | -2.12      | -2    | -1.73 | -2.05 | -2    | -3.64 | -2.39 | -1.21 | -1.18 | -2.05 | -1.28 | - |
| 1.08    | -1.59      | -2.83      | -2.83 | -2.64 | -1.43 | -0.88 | -0.08 | -0.53 | -0.26 | -0.12 | -0.1  |       |   |
| GENE52X | 18723_at   | 18723_at   | 1     | -2.64 | -1.88 | -2.83 | -3.64 | -3.47 | -3.83 | -     |       |       |   |
| 2.94    | -3.64      | -1.69      | -1.51 | -1.59 | -1.64 | -1.21 | -2.12 | -2.25 | -0.59 | -1.05 | -1.32 | -2.83 | - |
| 1.69    | -2         | -3.05      | -3.47 | -2    | -1.64 | -0.97 | -0.23 | -0.37 | -0.41 | -0.08 | -0.07 |       |   |
| GENE51X | 15862_at   | 15862_at   | 1     | -1.64 | -1.51 | -2.25 | -2.12 | -1.78 | -2.12 | -     |       |       |   |
| 1.25    | -1.35      | -0.86      | -0.73 | -0.68 | -1.02 | -1.12 | -0.71 | -1.25 | -0.73 | -0.28 | -0.81 | -0.76 | - |
| 0.66    | -1.35      | -0.66      | -1.28 | -1.25 | -0.49 | -0.21 | -0.04 | -0.25 | -0.15 | -0.02 | -0.04 |       |   |
| GENE50X | 16583_s_at | 16583_s_at | 1     | -3.47 | -3.05 | -3.64 | -3.47 | -3.32 | -3.18 | -     |       |       |   |
| 2.73    | -2.18      | -1.28      | -1.15 | -1.05 | -1.47 | -1.69 | -1.47 | -1.73 | -1.25 | -1.12 | -1.43 | -1.51 | - |
| 1.28    | -2.55      | -1.51      | -1.78 | -1.21 | -0.12 | -0.51 | 0     | -0.23 | 0.02  | -0.08 | -0.18 |       |   |
| GENE49X | 20506_at   | 20506_at   | 1     | -2.55 | -1.73 | -2.05 | -2.39 | -2.12 | -2.25 | -2    |       |       |   |
| -2      | -0.71      | -0.83      | -0.88 | -1.35 | -1.32 | -1.47 | -1.25 | -0.66 | -0.35 | -1.47 | -1.39 | -     |   |
| 1.25    | -1.32      | -1.25      | -1.51 | -1.21 | -0.64 | -0.41 | 0.08  | -0.05 | -0.18 | -0.16 | -0.1  |       |   |
| GENE48X | 19232_at   | 19232_at   | 1     | -3.64 | -2.25 | -2.83 | -4.05 | -3.32 | -3.64 | -     |       |       |   |
| 3.47    | -3.18      | -1.25      | -1.21 | -1.08 | -1.59 | -1.35 | -1.83 | -1.51 | -1.15 | -1.15 | -1.28 | -1.59 | - |
| 1.12    | -2.05      | -1.55      | -2.94 | -2.55 | -1.15 | -1    | -0.02 | -0.12 | -0.08 | -0.12 | -0.39 |       |   |
| GENE47X | 20063_at   | 20063_at   | 1     | -3.32 | -2.25 | -3.47 | -3.47 | -3.64 | -3.32 | -     |       |       |   |
| 3.18    | -2.94      | -1.08      | -1.39 | -0.91 | -1.05 | -1.12 | -1.43 | -1.73 | -0.91 | -0.91 | -1.43 | -1.21 | - |
| 1.28    | -2.18      | -1.59      | -2.83 | -2.18 | -1    | -0.55 | -0.23 | -0.59 | -0.28 | -0.25 | -0.07 |       |   |
| GENE43X | 14513_s_at | 14513_s_at | 1     | -2.25 | -2.64 | -4.05 | -4.64 | -2.83 | -2.83 | -     |       |       |   |
| 2.64    | -2.73      | -1.51      | -1.83 | -1.94 | -2    | -2.12 | -2.05 | -2.39 | -1.55 | -1.32 | -1.88 | -1.15 | - |
| 0.83    | -1.35      | -1.05      | -2.47 | -2.25 | -1.59 | -0.53 | 0.02  | -0.23 | -0.25 | -0.16 | 0.04  |       |   |
| GENE42X | 19127_at   | 19127_at   | 1     | -2.94 | -2.83 | -3.47 | -4.64 | -3.83 | -4.05 | -     |       |       |   |
| 3.32    | -2.32      | -1.78      | -1.73 | -2    | -2.12 | -1.88 | -1.83 | -2.39 | -1.59 | -1.55 | -2.18 | -1.51 | - |
| 0.83    | -1.32      | -2.05      | -1.73 | -1.73 | -1.51 | -0.55 | -0.51 | -0.68 | -0.57 | -0.2  | -0.1  |       |   |
| GENE40X | 15929_at   | 15929_at   | 1     | -3.64 | -2.94 | -4.64 | -5.05 | -3.83 | -3.47 | -     |       |       |   |
| 3.64    | -2.94      | -1.69      | -2.73 | -2.32 | -2.47 | -2.47 | -3.32 | -3.05 | -1.83 | -1.35 | -2.47 | -1.88 | - |
| 1.69    | -3.05      | -2         | -3.47 | -2    | -0.88 | -0.21 | -0.83 | -0.68 | -0.83 | 0.27  | -0.3  |       |   |
| GENE41X | 14543_r_at | 14543_r_at | 1     | -2.12 | -2.47 | -3.47 | -5.05 | -3.47 | -3.32 | -     |       |       |   |
| 2.32    | -2.39      | -0.91      | -2.47 | -1.51 | -1.94 | -1.35 | -1.55 | -2.94 | -0.78 | -0.49 | -1.35 | -1.21 | - |
| 1.08    | -2.05      | -1.43      | -2.83 | -1.59 | -1.25 | -0.81 | -0.37 | -0.2  | -0.45 | -0.15 | -0.21 |       |   |
| GENE16X | 15451_at   | 15451_at   | 1     | -2.18 | -1.94 | -2.55 | -2.73 | -2.73 | -2    | -     |       |       |   |
| 3.18    | -1.39      | -0.78      | -1.25 | -0.94 | -1.21 | -1.32 | -2    | -1.28 | -1.02 | -0.59 | -1.32 | -1.18 | - |
| 0.39    | -0.97      | -2         | -1.39 | -1.32 | -0.97 | -0.45 | -0.39 | -0.53 | -0.37 | -0.1  | -0.49 |       |   |

|         |            |            |       |       |       |       |       |       |       |       |       |       |   |
|---------|------------|------------|-------|-------|-------|-------|-------|-------|-------|-------|-------|-------|---|
| GENE15X | 15094_s_at | 15094_s_at | 1     | -1.73 | -1.73 | -2.47 | -2.64 | -2.47 | -2.12 | -     |       |       |   |
| 1.55    | -1.51      | -0.91      | -1    | -0.94 | -0.97 | -1    | -1.78 | -1.02 | -0.47 | -1.05 | -0.86 | -1.21 | - |
| 1.05    | -0.91      | -1.55      | -1    | -1.73 | -1.25 | -1.21 | -0.26 | -0.41 | -0.53 | 0.18  | -0.18 |       |   |
| GENE14X | 12319_at   | 12319_at   | 1     | -3.47 | -3.47 | -3.83 | -3.64 | -3.47 | -3.47 | -     |       |       |   |
| 2.94    | -2.94      | -2.25      | -2    | -1.21 | -2.55 | -1.88 | -2.94 | -2.55 | -1.69 | -2    | -1.78 | -1.64 | - |
| 1.73    | -2.32      | -3.47      | -2.83 | -2.83 | -2.18 | -1.12 | -0.04 | -0.97 | -0.43 | -0.32 | -0.39 |       |   |
| GENE39X | 19669_at   | 19669_at   | 1     | -0.57 | -0.59 | -0.64 | -0.76 | -1.47 | -1.21 | -     |       |       |   |
| 1.28    | -0.68      | -1         | -0.68 | -0.47 | -0.71 | -0.78 | -1.69 | -0.73 | -0.25 | -0.2  | -0.47 | -0.45 | - |
| 0.41    | -0.3       | -0.97      | -1.08 | -0.86 | -0.76 | -0.51 | 0     | -0.16 | 0.17  | -0.21 | -0.02 |       |   |
| GENE31X | 19116_i_at | 19116_i_at | 1     | -0.78 | -1.15 | -0.88 | -1.21 | -1.64 | -1.78 | -     |       |       |   |
| 1.12    | -1.08      | -0.97      | -0.64 | -0.26 | -0.53 | -0.76 | -0.91 | -0.35 | 0.01  | -0.3  | -0.37 | -0.37 | - |
| 0.37    | -0.73      | -0.94      | -0.94 | -0.73 | -0.59 | -0.55 | -0.41 | -0.28 | -0.25 | 0.01  | -0.04 |       |   |
| GENE30X | 14396_s_at | 14396_s_at | 1     | -2.05 | -1.28 | -2.47 | -1.55 | -3.18 | -2.94 | -2    |       |       |   |
| -1.88   | -1.51      | -1.12      | -0.94 | -0.57 | -1.32 | -1.73 | -0.55 | -0.55 | -0.73 | -1.39 | -0.35 |       |   |
| 0.23    | -1.18      | -1.59      | -1.78 | -1.21 | -1.69 | -1.28 | -0.76 | -1.25 | -0.39 | 0     | -0.37 |       |   |
| GENE12X | 16312_at   | 16312_at   | 1     | -1.88 | -2    | -3.64 | -3.47 | -3.47 | -3.47 | -     |       |       |   |
| 3.64    | -2.47      | -2.83      | -2    | -1.88 | -1.55 | -1.43 | -3.18 | -2.32 | 0.17  | -0.88 | -1.78 | -2.47 | - |
| 0.1     | -2.18      | -3.47      | -2.55 | -2    | -1.73 | -2.25 | -0.97 | -0.97 | -0.43 | 0.79  | 0.79  |       |   |
| GENE11X | 14018_at   | 14018_at   | 1     | -1.94 | -1.43 | -2.83 | -2.47 | -3.64 | -3.18 | -     |       |       |   |
| 2.83    | -2.39      | -1.18      | -1.83 | -2.18 | -1.59 | -1.64 | -1.94 | -1.55 | -1.05 | -1.35 | -2    | -1.69 | - |
| 0.81    | -1.39      | -2.73      | -2.05 | -1.78 | -1.25 | -2.39 | -0.97 | -0.3  | -0.2  | -0.12 | 0.01  |       |   |
| GENE29X | 13940_at   | 13940_at   | 1     | -0.41 | -0.39 | -0.94 | -1.21 | -1.15 | -1.08 | -     |       |       |   |
| 0.59    | -0.71      | -0.55      | -0.57 | -0.37 | -0.18 | 0.11  | -0.35 | -0.78 | -0.02 | 0.32  | -0.43 | -0.43 | - |
| 0.04    | -0.59      | -0.66      | -0.68 | -0.59 | -0.39 | -0.26 | -0.12 | 0.05  | -0.2  | 0.33  | 0.11  |       |   |
| GENE28X | 14578_s_at | 14578_s_at | 1     | -0.66 | -0.57 | -0.83 | -1.02 | -1.28 | -1.28 | -     |       |       |   |
| 0.88    | -0.86      | -0.62      | -0.18 | -0.53 | -0.23 | -0.32 | -0.57 | -1.15 | 0.12  | -0.08 | -0.86 | -0.78 | - |
| 0.13    | -0.3       | -0.94      | -0.47 | -0.15 | -0.12 | -0.34 | 0.05  | -0.1  | -0.04 | 0     | 0.21  |       |   |
| GENE27X | 14118_i_at | 14118_i_at | 1     | -0.53 | -1.15 | -1.55 | -1.69 | -1.94 | -1.83 | -     |       |       |   |
| 1.35    | -1.59      | -1.64      | -0.62 | -0.94 | -0.21 | -0.34 | -0.94 | -0.94 | -0.57 | -0.12 | -0.88 | -0.62 | - |
| 0.2     | -0.94      | -1.55      | -0.47 | -0.21 | -0.12 | -0.47 | -0.21 | -0.39 | -0.39 | 0.09  | -0.12 |       |   |
| GENE21X | 12141_s_at | 12141_s_at | 1     | -1.32 | -0.51 | -1.02 | -1.55 | -1.39 | -1.18 | -     |       |       |   |
| 0.43    | -0.78      | -1.02      | -0.62 | -0.73 | -0.35 | -0.53 | -0.62 | -0.55 | -0.43 | -0.51 | -0.91 | -0.76 | - |
| 0.07    | -0.23      | -1         | -0.57 | -0.57 | -0.32 | -0.66 | -0.2  | -0.32 | -0.05 | 0     | -0.08 |       |   |
| GENE20X | 17067_s_at | 17067_s_at | 1     | -1.32 | -0.78 | -1.47 | -1.32 | -1.51 | -1.21 | -     |       |       |   |
| 0.59    | -0.68      | -0.68      | -1.02 | -0.73 | -0.68 | -0.78 | -0.66 | -1.21 | -0.18 | -0.41 | -0.94 | -0.68 | - |
| 0.23    | -0.59      | -0.83      | -0.59 | -0.37 | -0.12 | -0.78 | -0.2  | -0.16 | -0.01 | -0.18 | 0.01  |       |   |
| GENE19X | 18985_g_at | 18985_g_at | 1     | -1.39 | -0.57 | -1.73 | -1.78 | -2.05 | -2.64 | -     |       |       |   |
| 1.15    | -1.43      | -0.62      | -0.83 | -0.83 | -0.55 | -0.66 | -1.15 | -0.97 | -0.37 | -0.41 | -0.97 | -0.66 | - |
| 0.08    | -0.83      | -1.02      | -0.71 | -0.68 | -0.43 | -0.64 | -0.23 | -0.28 | -0.23 | -0.23 | -0.35 |       |   |
| GENE18X | 15548_at   | 15548_at   | 1     | -2.18 | -1    | -1.73 | -2.32 | -2.94 | -2.94 | -     |       |       |   |
| 1.64    | -1.64      | -1.43      | -1.21 | -1.05 | -0.59 | -0.51 | -1.78 | -1.59 | -0.37 | -0.62 | -1.05 | -0.97 | - |
| 0.91    | -0.78      | -0.83      | -1.18 | -1.18 | -0.86 | -0.53 | -0.07 | -0.45 | -0.39 | -0.35 | 0.07  |       |   |
| GENE17X | 15045_at   | 15045_at   | 1     | -2.94 | -1.59 | -2.64 | -3.47 | -3.47 | -3.05 | -     |       |       |   |
| 1.69    | -1.88      | -1.69      | -1.35 | -2.18 | -1.28 | -1.64 | -1.88 | -1.83 | -1.25 | -0.86 | -1.78 | -1.02 | - |
| 1.28    | -2.25      | -2.39      | -1.73 | -1.78 | -0.73 | -0.26 | 0.74  | -0.57 | -0.49 | 0.63  | -0.32 |       |   |
