# Supplementary material
Source: PubMed Central journal article supplement (PMC141204)
Supplement: plntcell_15_2_317__10.pdf [file plntcell_15_2_317__10.pdf]

|         |           |           |                  |
|---------|-----------|-----------|------------------|
| NODE1X  | GENE1600X | GENE1599X | 0.99713134765625 |
| NODE2X  | GENE2462X | GENE2461X | 0.996826171875   |
| NODE3X  | GENE745X  | GENE744X  | 0.9967041015625  |
| NODE4X  | GENE840X  | GENE839X  | 0.99591064453125 |
| NODE5X  | GENE24X   | GENE23X   | 0.995849609375   |
| NODE6X  | GENE783X  | GENE782X  | 0.995849609375   |
| NODE7X  | GENE771X  | GENE770X  | 0.9952392578125  |
| NODE8X  | GENE124X  | GENE123X  | 0.99517822265625 |
| NODE9X  | GENE2338X | GENE2337X | 0.9949951171875  |
| NODE10X | GENE2489X | GENE2488X | 0.99481201171875 |
| NODE11X | GENE130X  | GENE129X  | 0.99468994140625 |
| NODE12X | GENE781X  | GENE780X  | 0.99468994140625 |
| NODE13X | GENE2331X | GENE2330X | 0.99468994140625 |
| NODE14X | GENE2299X | GENE2298X | 0.99432373046875 |
| NODE15X | GENE155X  | GENE154X  | 0.994140625      |
| NODE16X | GENE850X  | GENE849X  | 0.99383544921875 |
| NODE17X | GENE743X  | GENE742X  | 0.993408203125   |
| NODE18X | GENE736X  | GENE735X  | 0.9932861328125  |
| NODE19X | GENE832X  | GENE831X  | 0.9932861328125  |
| NODE20X | GENE294X  | GENE293X  | 0.9931640625     |
| NODE21X | GENE876X  | GENE875X  | 0.99310302734375 |
| NODE22X | GENE746X  | NODE3X    | 0.992919921875   |
| NODE23X | GENE822X  | GENE821X  | 0.99285888671875 |
| NODE24X | GENE741X  | GENE740X  | 0.9927978515625  |
| NODE25X | GENE834X  | GENE833X  | 0.9927978515625  |
| NODE26X | GENE1709X | GENE1708X | 0.99273681640625 |
| NODE27X | GENE1551X | GENE1550X | 0.99261474609375 |
| NODE28X | GENE125X  | NODE8X    | 0.99261474609375 |
| NODE29X | GENE2117X | GENE2116X | 0.9925537109375  |
| NODE30X | GENE807X  | GENE806X  | 0.992431640625   |
| NODE31X | GENE201X  | GENE200X  | 0.9923095703125  |
| NODE32X | GENE757X  | GENE756X  | 0.9923095703125  |
| NODE33X | GENE2339X | NODE9X    | 0.9920654296875  |
| NODE34X | GENE816X  | GENE815X  | 0.99169921875    |
| NODE35X | GENE843X  | GENE842X  | 0.99163818359375 |
| NODE36X | GENE2391X | GENE2390X | 0.99163818359375 |
| NODE37X | GENE110X  | GENE109X  | 0.991455078125   |
| NODE38X | GENE762X  | GENE761X  | 0.991455078125   |
| NODE39X | GENE117X  | GENE116X  | 0.9910888671875  |
| NODE40X | GENE737X  | NODE18X   | 0.99066162109375 |
| NODE41X | GENE779X  | GENE778X  | 0.9906005859375  |
| NODE42X | GENE112X  | GENE111X  | 0.990478515625   |
| NODE43X | NODE17X   | GENE738X  | 0.9903564453125  |
| NODE44X | GENE2303X | GENE2302X | 0.9903564453125  |
| NODE45X | GENE748X  | GENE747X  | 0.99029541015625 |
| NODE46X | NODE6X    | NODE12X   | 0.99029541015625 |
| NODE47X | GENE786X  | GENE785X  | 0.99017333984375 |
| NODE48X | GENE2550X | GENE2549X | 0.99017333984375 |
| NODE49X | GENE777X  | GENE776X  | 0.99005126953125 |
| NODE50X | GENE180X  | GENE179X  | 0.989990234375   |
| NODE51X | GENE810X  | GENE809X  | 0.989990234375   |
| NODE52X | GENE264X  | GENE263X  | 0.9898681640625  |
| NODE53X | GENE297X  | GENE296X  | 0.9898681640625  |
| NODE54X | NODE16X   | GENE848X  | 0.9898681640625  |
| NODE55X | GENE48X   | GENE47X   | 0.98974609375    |
| NODE56X | GENE138X  | GENE137X  | 0.98974609375    |
| NODE57X | NODE7X    | GENE769X  | 0.98968505859375 |

|          |           |           |                  |
|----------|-----------|-----------|------------------|
| NODE58X  | GENE115X  | GENE114X  | 0.9896240234375  |
| NODE59X  | GENE750X  | GENE749X  | 0.9896240234375  |
| NODE60X  | NODE4X    | GENE838X  | 0.9896240234375  |
| NODE61X  | GENE956X  | GENE955X  | 0.989501953125   |
| NODE62X  | GENE845X  | GENE844X  | 0.98944091796875 |
| NODE63X  | GENE1592X | GENE1591X | 0.9891357421875  |
| NODE64X  | GENE586X  | GENE585X  | 0.989013671875   |
| NODE65X  | GENE2295X | GENE2294X | 0.98876953125    |
| NODE66X  | NODE22X   | NODE28X   | 0.98876953125    |
| NODE67X  | GENE118X  | NODE39X   | 0.98876953125    |
| NODE68X  | GENE128X  | GENE127X  | 0.98858642578125 |
| NODE69X  | GENE193X  | GENE192X  | 0.98858642578125 |
| NODE70X  | NODE21X   | GENE874X  | 0.98846435546875 |
| NODE71X  | GENE45X   | GENE44X   | 0.98828125       |
| NODE72X  | GENE898X  | GENE897X  | 0.9881591796875  |
| NODE73X  | NODE56X   | GENE136X  | 0.98779296875    |
| NODE74X  | GENE203X  | GENE202X  | 0.98760986328125 |
| NODE75X  | GENE755X  | GENE753X  | 0.98748779296875 |
| NODE76X  | NODE25X   | NODE19X   | 0.9874267578125  |
| NODE77X  | GENE2597X | GENE2596X | 0.98724365234375 |
| NODE78X  | GENE126X  | GENE85X   | 0.9871826171875  |
| NODE79X  | GENE758X  | NODE32X   | 0.98712158203125 |
| NODE80X  | NODE23X   | GENE820X  | 0.9869384765625  |
| NODE81X  | GENE1330X | GENE1329X | 0.9869384765625  |
| NODE82X  | GENE240X  | GENE239X  | 0.98681640625    |
| NODE83X  | GENE895X  | GENE894X  | 0.9866943359375  |
| NODE84X  | NODE20X   | GENE292X  | 0.98651123046875 |
| NODE85X  | GENE67X   | GENE66X   | 0.98638916015625 |
| NODE86X  | GENE846X  | NODE62X   | 0.98638916015625 |
| NODE87X  | GENE1539X | GENE1538X | 0.986328125      |
| NODE88X  | GENE133X  | GENE132X  | 0.98626708984375 |
| NODE89X  | GENE814X  | GENE813X  | 0.9862060546875  |
| NODE90X  | GENE142X  | GENE141X  | 0.98602294921875 |
| NODE91X  | NODE47X   | GENE784X  | 0.98602294921875 |
| NODE92X  | GENE1925X | GENE1924X | 0.98602294921875 |
| NODE93X  | GENE808X  | NODE30X   | 0.98590087890625 |
| NODE94X  | GENE899X  | NODE72X   | 0.98583984375    |
| NODE95X  | GENE2496X | GENE2495X | 0.9857177734375  |
| NODE96X  | NODE54X   | GENE847X  | 0.98565673828125 |
| NODE97X  | GENE78X   | GENE77X   | 0.98553466796875 |
| NODE98X  | GENE836X  | GENE835X  | 0.98553466796875 |
| NODE99X  | NODE43X   | GENE207X  | 0.9854736328125  |
| NODE100X | GENE2452X | GENE2451X | 0.98541259765625 |
| NODE101X | GENE319X  | GENE318X  | 0.9853515625     |
| NODE102X | GENE271X  | GENE84X   | 0.9852294921875  |
| NODE103X | NODE49X   | GENE775X  | 0.9852294921875  |
| NODE104X | GENE562X  | GENE561X  | 0.985107421875   |
| NODE105X | NODE37X   | GENE108X  | 0.98504638671875 |
| NODE106X | GENE148X  | GENE147X  | 0.98504638671875 |
| NODE107X | GENE152X  | GENE151X  | 0.98504638671875 |
| NODE108X | GENE160X  | GENE159X  | 0.98504638671875 |
| NODE109X | NODE74X   | NODE31X   | 0.9849853515625  |
| NODE110X | GENE168X  | GENE68X   | 0.98492431640625 |
| NODE111X | GENE183X  | NODE11X   | 0.98492431640625 |
| NODE112X | GENE211X  | GENE210X  | 0.98486328125    |
| NODE113X | GENE1831X | GENE1830X | 0.98480224609375 |
| NODE114X | NODE5X    | GENE22X   | 0.98480224609375 |

|          |           |           |                  |
|----------|-----------|-----------|------------------|
| NODE115X | GENE2348X | GENE2347X | 0.98468017578125 |
| NODE116X | GENE205X  | GENE204X  | 0.984619140625   |
| NODE117X | GENE2473X | GENE2472X | 0.984619140625   |
| NODE118X | GENE215X  | GENE214X  | 0.98455810546875 |
| NODE119X | GENE772X  | NODE57X   | 0.98455810546875 |
| NODE120X | NODE58X   | GENE113X  | 0.98443603515625 |
| NODE121X | NODE86X   | GENE763X  | 0.98443603515625 |
| NODE122X | GENE2479X | GENE2478X | 0.984375         |
| NODE123X | NODE46X   | NODE41X   | 0.98406982421875 |
| NODE124X | GENE325X  | GENE91X   | 0.98394775390625 |
| NODE125X | GENE796X  | GENE795X  | 0.98394775390625 |
| NODE126X | GENE40X   | NODE99X   | 0.98394775390625 |
| NODE127X | GENE2162X | GENE2161X | 0.98382568359375 |
| NODE128X | GENE584X  | GENE583X  | 0.98370361328125 |
| NODE129X | GENE1250X | GENE1249X | 0.983642578125   |
| NODE130X | GENE95X   | GENE94X   | 0.98358154296875 |
| NODE131X | NODE79X   | NODE66X   | 0.9835205078125  |
| NODE132X | GENE76X   | GENE75X   | 0.98345947265625 |
| NODE133X | GENE752X  | GENE751X  | 0.98345947265625 |
| NODE134X | GENE119X  | NODE67X   | 0.9833984375     |
| NODE135X | GENE556X  | GENE555X  | 0.98333740234375 |
| NODE136X | GENE787X  | GENE754X  | 0.98333740234375 |
| NODE137X | GENE56X   | GENE55X   | 0.9832763671875  |
| NODE138X | GENE46X   | NODE71X   | 0.983154296875   |
| NODE139X | NODE110X  | GENE69X   | 0.98309326171875 |
| NODE140X | GENE269X  | GENE268X  | 0.9830322265625  |
| NODE141X | NODE24X   | GENE739X  | 0.98284912109375 |
| NODE142X | GENE198X  | GENE197X  | 0.982666015625   |
| NODE143X | GENE273X  | GENE272X  | 0.98260498046875 |
| NODE144X | GENE760X  | GENE759X  | 0.98260498046875 |
| NODE145X | GENE878X  | GENE877X  | 0.9825439453125  |
| NODE146X | NODE59X   | NODE45X   | 0.98248291015625 |
| NODE147X | GENE1595X | GENE1594X | 0.98236083984375 |
| NODE148X | GENE303X  | GENE302X  | 0.98223876953125 |
| NODE149X | GENE51X   | GENE50X   | 0.98211669921875 |
| NODE150X | GENE765X  | GENE764X  | 0.98193359375    |
| NODE151X | GENE121X  | GENE120X  | 0.98187255859375 |
| NODE152X | GENE249X  | GENE248X  | 0.98187255859375 |
| NODE153X | GENE799X  | GENE798X  | 0.9818115234375  |
| NODE154X | GENE841X  | NODE60X   | 0.9818115234375  |
| NODE155X | GENE2456X | GENE2455X | 0.9818115234375  |
| NODE156X | GENE232X  | GENE231X  | 0.98175048828125 |
| NODE157X | NODE107X  | GENE150X  | 0.981689453125   |
| NODE158X | NODE50X   | GENE178X  | 0.981689453125   |
| NODE159X | GENE35X   | GENE34X   | 0.98162841796875 |
| NODE160X | GENE2678X | GENE2590X | 0.98162841796875 |
| NODE161X | NODE73X   | NODE78X   | 0.98162841796875 |
| NODE162X | GENE276X  | GENE275X  | 0.9814453125     |
| NODE163X | GENE793X  | GENE792X  | 0.9814453125     |
| NODE164X | GENE102X  | GENE101X  | 0.98138427734375 |
| NODE165X | GENE873X  | GENE872X  | 0.98138427734375 |
| NODE166X | GENE241X  | NODE82X   | 0.98138427734375 |
| NODE167X | GENE73X   | GENE72X   | 0.9813232421875  |
| NODE168X | GENE208X  | GENE206X  | 0.98126220703125 |
| NODE169X | GENE790X  | GENE789X  | 0.98126220703125 |
| NODE170X | GENE324X  | GENE323X  | 0.981201171875   |
| NODE171X | GENE773X  | NODE119X  | 0.9810791015625  |

|          |           |           |                  |
|----------|-----------|-----------|------------------|
| NODE172X | GENE880X  | GENE879X  | 0.98101806640625 |
| NODE173X | GENE335X  | GENE334X  | 0.98089599609375 |
| NODE174X | GENE812X  | GENE811X  | 0.98089599609375 |
| NODE175X | GENE959X  | GENE958X  | 0.9808349609375  |
| NODE176X | NODE112X  | GENE209X  | 0.98077392578125 |
| NODE177X | GENE1746X | GENE1745X | 0.9805908203125  |
| NODE178X | GENE804X  | GENE803X  | 0.98052978515625 |
| NODE179X | GENE509X  | GENE508X  | 0.98046875       |
| NODE180X | GENE526X  | GENE525X  | 0.9803466796875  |
| NODE181X | GENE788X  | NODE136X  | 0.9803466796875  |
| NODE182X | GENE819X  | GENE818X  | 0.980224609375   |
| NODE183X | GENE167X  | GENE166X  | 0.98016357421875 |
| NODE184X | GENE1765X | GENE1764X | 0.98016357421875 |
| NODE185X | GENE614X  | GENE613X  | 0.97998046875    |
| NODE186X | GENE1545X | GENE1544X | 0.97998046875    |
| NODE187X | NODE93X   | GENE805X  | 0.9798583984375  |
| NODE188X | GENE164X  | GENE163X  | 0.97979736328125 |
| NODE189X | GENE171X  | GENE170X  | 0.979736328125   |
| NODE190X | GENE2623X | GENE2622X | 0.979736328125   |
| NODE191X | GENE145X  | GENE144X  | 0.9796142578125  |
| NODE192X | GENE2309X | GENE2308X | 0.9793701171875  |
| NODE193X | GENE54X   | GENE53X   | 0.97930908203125 |
| NODE194X | NODE103X  | GENE774X  | 0.97930908203125 |
| NODE195X | NODE75X   | NODE131X  | 0.97930908203125 |
| NODE196X | GENE767X  | GENE766X  | 0.979248046875   |
| NODE197X | GENE80X   | GENE79X   | 0.9791259765625  |
| NODE198X | GENE2133X | GENE2132X | 0.97900390625    |
| NODE199X | NODE76X   | GENE830X  | 0.9786376953125  |
| NODE200X | GENE282X  | GENE281X  | 0.97857666015625 |
| NODE201X | GENE817X  | NODE34X   | 0.97857666015625 |
| NODE202X | GENE1649X | GENE1648X | 0.97857666015625 |
| NODE203X | GENE837X  | NODE98X   | 0.97845458984375 |
| NODE204X | GENE2122X | GENE2121X | 0.97845458984375 |
| NODE205X | GENE884X  | GENE883X  | 0.9783935546875  |
| NODE206X | NODE70X   | NODE165X  | 0.9783935546875  |
| NODE207X | GENE277X  | NODE162X  | 0.9783935546875  |
| NODE208X | GENE2448X | GENE2447X | 0.978271484375   |
| NODE209X | NODE154X  | NODE38X   | 0.978271484375   |
| NODE210X | GENE2130X | GENE2129X | 0.97821044921875 |
| NODE211X | GENE43X   | GENE42X   | 0.9781494140625  |
| NODE212X | GENE395X  | GENE394X  | 0.9781494140625  |
| NODE213X | GENE825X  | GENE824X  | 0.9781494140625  |
| NODE214X | GENE2615X | GENE2614X | 0.97808837890625 |
| NODE215X | NODE1X    | GENE1598X | 0.97808837890625 |
| NODE216X | GENE604X  | GENE603X  | 0.97802734375    |
| NODE217X | GENE265X  | NODE52X   | 0.9776611328125  |
| NODE218X | NODE132X  | GENE74X   | 0.97747802734375 |
| NODE219X | GENE2301X | GENE2300X | 0.97747802734375 |
| NODE220X | NODE42X   | NODE105X  | 0.9774169921875  |
| NODE221X | GENE135X  | NODE161X  | 0.9774169921875  |
| NODE222X | GENE49X   | NODE55X   | 0.97735595703125 |
| NODE223X | GENE890X  | GENE889X  | 0.97735595703125 |
| NODE224X | GENE153X  | NODE157X  | 0.97735595703125 |
| NODE225X | GENE797X  | NODE125X  | 0.977294921875   |
| NODE226X | GENE242X  | GENE157X  | 0.9771728515625  |
| NODE227X | GENE274X  | NODE143X  | 0.9771728515625  |
| NODE228X | GENE233X  | NODE156X  | 0.97711181640625 |

|          |           |           |                  |
|----------|-----------|-----------|------------------|
| NODE229X | NODE33X   | GENE2336X | 0.97705078125    |
| NODE230X | GENE418X  | GENE417X  | 0.97698974609375 |
| NODE231X | NODE167X  | GENE71X   | 0.97698974609375 |
| NODE232X | NODE35X   | GENE768X  | 0.97686767578125 |
| NODE233X | GENE429X  | GENE428X  | 0.976806640625   |
| NODE234X | GENE2389X | GENE1603X | 0.976806640625   |
| NODE235X | GENE298X  | NODE53X   | 0.97674560546875 |
| NODE236X | GENE2135X | GENE2134X | 0.97674560546875 |
| NODE237X | GENE86X   | GENE4X    | 0.97662353515625 |
| NODE238X | NODE83X   | GENE893X  | 0.97662353515625 |
| NODE239X | GENE1302X | GENE1301X | 0.97662353515625 |
| NODE240X | NODE126X  | NODE15X   | 0.9765625        |
| NODE241X | GENE107X  | GENE106X  | 0.9764404296875  |
| NODE242X | GENE2114X | GENE2113X | 0.97637939453125 |
| NODE243X | GENE2444X | GENE2443X | 0.976318359375   |
| NODE244X | GENE196X  | GENE195X  | 0.97625732421875 |
| NODE245X | GENE2328X | GENE1602X | 0.97625732421875 |
| NODE246X | GENE823X  | NODE80X   | 0.97613525390625 |
| NODE247X | GENE858X  | GENE857X  | 0.97607421875    |
| NODE248X | GENE143X  | NODE90X   | 0.97601318359375 |
| NODE249X | GENE800X  | NODE153X  | 0.9759521484375  |
| NODE250X | GENE860X  | GENE859X  | 0.9759521484375  |
| NODE251X | NODE109X  | NODE102X  | 0.97589111328125 |
| NODE252X | GENE2514X | GENE2513X | 0.975830078125   |
| NODE253X | GENE791X  | NODE169X  | 0.97576904296875 |
| NODE254X | GENE1597X | GENE1596X | 0.9757080078125  |
| NODE255X | GENE1661X | GENE1660X | 0.9757080078125  |
| NODE256X | GENE1716X | GENE1715X | 0.9757080078125  |
| NODE257X | GENE97X   | GENE96X   | 0.97564697265625 |
| NODE258X | GENE131X  | NODE68X   | 0.9755859375     |
| NODE259X | NODE189X  | GENE169X  | 0.9755859375     |
| NODE260X | NODE155X  | GENE2454X | 0.97552490234375 |
| NODE261X | GENE2021X | GENE2020X | 0.97540283203125 |
| NODE262X | NODE123X  | NODE194X  | 0.97540283203125 |
| NODE263X | NODE159X  | GENE33X   | 0.975341796875   |
| NODE264X | GENE213X  | GENE212X  | 0.975341796875   |
| NODE265X | GENE246X  | GENE92X   | 0.97528076171875 |
| NODE266X | GENE83X   | GENE82X   | 0.9752197265625  |
| NODE267X | GENE300X  | GENE299X  | 0.9752197265625  |
| NODE268X | NODE101X  | GENE317X  | 0.9752197265625  |
| NODE269X | GENE199X  | NODE142X  | 0.97515869140625 |
| NODE270X | NODE137X  | NODE193X  | 0.97509765625    |
| NODE271X | GENE2520X | GENE2519X | 0.97503662109375 |
| NODE272X | GENE2374X | GENE2373X | 0.9749755859375  |
| NODE273X | GENE2677X | GENE2676X | 0.9749755859375  |
| NODE274X | GENE1533X | GENE1532X | 0.974853515625   |
| NODE275X | NODE96X   | NODE209X  | 0.97479248046875 |
| NODE276X | GENE1664X | GENE1663X | 0.9747314453125  |
| NODE277X | GENE529X  | GENE528X  | 0.97467041015625 |
| NODE278X | GENE882X  | GENE881X  | 0.9744873046875  |
| NODE279X | GENE270X  | NODE140X  | 0.97442626953125 |
| NODE280X | NODE135X  | GENE554X  | 0.97442626953125 |
| NODE281X | GENE1617X | GENE1616X | 0.974365234375   |
| NODE282X | GENE65X   | GENE64X   | 0.97430419921875 |
| NODE283X | GENE251X  | GENE250X  | 0.9742431640625  |
| NODE284X | GENE266X  | NODE217X  | 0.97412109375    |
| NODE285X | GENE134X  | NODE88X   | 0.97406005859375 |

|          |           |           |                  |
|----------|-----------|-----------|------------------|
| NODE286X | GENE2139X | GENE2138X | 0.9739990234375  |
| NODE287X | NODE69X   | NODE138X  | 0.9739990234375  |
| NODE288X | GENE2154X | GENE2153X | 0.973876953125   |
| NODE289X | GENE61X   | GENE60X   | 0.97369384765625 |
| NODE290X | GENE161X  | NODE108X  | 0.97369384765625 |
| NODE291X | NODE139X  | NODE85X   | 0.97369384765625 |
| NODE292X | NODE224X  | GENE149X  | 0.97357177734375 |
| NODE293X | GENE235X  | GENE234X  | 0.97357177734375 |
| NODE294X | GENE802X  | GENE801X  | 0.9735107421875  |
| NODE295X | NODE213X  | NODE246X  | 0.9735107421875  |
| NODE296X | GENE2136X | NODE236X  | 0.97344970703125 |
| NODE297X | GENE2465X | GENE2464X | 0.973388671875   |
| NODE298X | GENE2X    | GENE1X    | 0.97332763671875 |
| NODE299X | GENE188X  | GENE187X  | 0.97332763671875 |
| NODE300X | GENE287X  | GENE286X  | 0.97332763671875 |
| NODE301X | GENE15X   | GENE14X   | 0.97320556640625 |
| NODE302X | GENE295X  | NODE84X   | 0.97320556640625 |
| NODE303X | GENE438X  | GENE437X  | 0.97320556640625 |
| NODE304X | NODE133X  | NODE146X  | 0.97320556640625 |
| NODE305X | GENE612X  | GENE611X  | 0.97314453125    |
| NODE306X | GENE2274X | GENE2273X | 0.97308349609375 |
| NODE307X | GENE533X  | GENE532X  | 0.9730224609375  |
| NODE308X | NODE211X  | GENE40X   | 0.97283935546875 |
| NODE309X | GENE237X  | GENE236X  | 0.97283935546875 |
| NODE310X | NODE150X  | GENE330X  | 0.9727783203125  |
| NODE311X | GENE360X  | GENE359X  | 0.9727783203125  |
| NODE312X | GENE550X  | GENE549X  | 0.97271728515625 |
| NODE313X | GENE1740X | GENE1739X | 0.97265625       |
| NODE314X | GENE181X  | NODE158X  | 0.97259521484375 |
| NODE315X | GENE2327X | GENE2326X | 0.9725341796875  |
| NODE316X | NODE144X  | NODE195X  | 0.97247314453125 |
| NODE317X | GENE165X  | NODE188X  | 0.972412109375   |
| NODE318X | GENE305X  | NODE116X  | 0.97222900390625 |
| NODE319X | GENE409X  | GENE408X  | 0.97198486328125 |
| NODE320X | NODE147X  | GENE1593X | 0.97198486328125 |
| NODE321X | NODE176X  | NODE168X  | 0.971923828125   |
| NODE322X | NODE304X  | NODE141X  | 0.971923828125   |
| NODE323X | GENE140X  | GENE139X  | 0.97186279296875 |
| NODE324X | GENE1077X | GENE1076X | 0.9716796875     |
| NODE325X | GENE2446X | GENE1675X | 0.9716796875     |
| NODE326X | GENE175X  | GENE174X  | 0.97161865234375 |
| NODE327X | GENE966X  | GENE965X  | 0.97149658203125 |
| NODE328X | GENE2487X | GENE2486X | 0.97149658203125 |
| NODE329X | NODE199X  | NODE121X  | 0.97137451171875 |
| NODE330X | GENE2476X | GENE2475X | 0.97119140625    |
| NODE331X | GENE2592X | GENE2591X | 0.97119140625    |
| NODE332X | GENE2643X | GENE2642X | 0.97113037109375 |
| NODE333X | GENE2675X | GENE2674X | 0.97113037109375 |
| NODE334X | GENE2499X | GENE2498X | 0.9710693359375  |
| NODE335X | GENE2521X | NODE271X  | 0.9710693359375  |
| NODE336X | GENE278X  | NODE207X  | 0.97100830078125 |
| NODE337X | GENE2152X | GENE2151X | 0.970947265625   |
| NODE338X | NODE227X  | GENE254X  | 0.9708251953125  |
| NODE339X | NODE120X  | NODE220X  | 0.970703125      |
| NODE340X | GENE225X  | GENE224X  | 0.97064208984375 |
| NODE341X | GENE1372X | GENE1371X | 0.970458984375   |
| NODE342X | NODE89X   | NODE262X  | 0.970458984375   |

|          |           |           |                  |
|----------|-----------|-----------|------------------|
| NODE343X | GENE19X   | GENE18X   | 0.97039794921875 |
| NODE344X | GENE2149X | GENE2148X | 0.97027587890625 |
| NODE345X | GENE2658X | GENE2657X | 0.97015380859375 |
| NODE346X | NODE91X   | NODE181X  | 0.9700927734375  |
| NODE347X | GENE376X  | GENE375X  | 0.97003173828125 |
| NODE348X | GENE406X  | NODE170X  | 0.97003173828125 |
| NODE349X | GENE457X  | GENE456X  | 0.9698486328125  |
| NODE350X | NODE64X   | NODE128X  | 0.9698486328125  |
| NODE351X | GENE2036X | GENE2035X | 0.96978759765625 |
| NODE352X | NODE270X  | GENE52X   | 0.96978759765625 |
| NODE353X | NODE178X  | NODE111X  | 0.9697265625     |
| NODE354X | GENE190X  | GENE146X  | 0.96966552734375 |
| NODE355X | NODE104X  | GENE560X  | 0.96966552734375 |
| NODE356X | GENE581X  | NODE191X  | 0.96966552734375 |
| NODE357X | GENE606X  | GENE605X  | 0.969482421875   |
| NODE358X | GENE2440X | GENE2439X | 0.969482421875   |
| NODE359X | GENE531X  | GENE530X  | 0.9693603515625  |
| NODE360X | GENE1574X | GENE1573X | 0.9693603515625  |
| NODE361X | GENE1611X | GENE1610X | 0.96929931640625 |
| NODE362X | GENE2493X | GENE2492X | 0.96929931640625 |
| NODE363X | GENE2160X | GENE2131X | 0.96923828125    |
| NODE364X | GENE2110X | GENE2109X | 0.96917724609375 |
| NODE365X | GENE90X   | GENE89X   | 0.9691162109375  |
| NODE366X | NODE275X  | NODE232X  | 0.9691162109375  |
| NODE367X | NODE235X  | NODE244X  | 0.9691162109375  |
| NODE368X | GENE1254X | GENE1253X | 0.96905517578125 |
| NODE369X | GENE1615X | GENE1614X | 0.96905517578125 |
| NODE370X | GENE122X  | NODE151X  | 0.968994140625   |
| NODE371X | GENE1028X | GENE1027X | 0.96893310546875 |
| NODE372X | GENE610X  | GENE609X  | 0.9688720703125  |
| NODE373X | GENE220X  | GENE219X  | 0.96881103515625 |
| NODE374X | GENE2040X | GENE2039X | 0.96881103515625 |
| NODE375X | GENE2066X | GENE2065X | 0.96881103515625 |
| NODE376X | NODE219X  | NODE14X   | 0.96881103515625 |
| NODE377X | NODE149X  | NODE222X  | 0.96881103515625 |
| NODE378X | GENE57X   | NODE352X  | 0.96881103515625 |
| NODE379X | GENE2059X | GENE2058X | 0.96875          |
| NODE380X | GENE2368X | GENE2367X | 0.96868896484375 |
| NODE381X | NODE77X   | GENE2595X | 0.96868896484375 |
| NODE382X | GENE351X  | GENE350X  | 0.9686279296875  |
| NODE383X | GENE59X   | GENE58X   | 0.96856689453125 |
| NODE384X | NODE124X  | GENE87X   | 0.96856689453125 |
| NODE385X | GENE1752X | GENE1751X | 0.96856689453125 |
| NODE386X | GENE238X  | NODE309X  | 0.968505859375   |
| NODE387X | GENE416X  | GENE415X  | 0.96844482421875 |
| NODE388X | GENE960X  | NODE175X  | 0.96844482421875 |
| NODE389X | NODE197X  | NODE97X   | 0.9683837890625  |
| NODE390X | GENE372X  | GENE156X  | 0.96826171875    |
| NODE391X | NODE192X  | GENE2307X | 0.96820068359375 |
| NODE392X | GENE185X  | GENE184X  | 0.9681396484375  |
| NODE393X | GENE592X  | GENE591X  | 0.96807861328125 |
| NODE394X | GENE430X  | NODE233X  | 0.96807861328125 |
| NODE395X | NODE313X  | GENE1738X | 0.96807861328125 |
| NODE396X | GENE304X  | NODE318X  | 0.96807861328125 |
| NODE397X | GENE651X  | GENE572X  | 0.968017578125   |
| NODE398X | NODE183X  | NODE317X  | 0.96795654296875 |
| NODE399X | NODE94X   | NODE238X  | 0.9678955078125  |

|          |           |           |                  |
|----------|-----------|-----------|------------------|
| NODE400X | GENE1974X | GENE1973X | 0.9676513671875  |
| NODE401X | GENE2304X | NODE44X   | 0.9676513671875  |
| NODE402X | GENE411X  | GENE410X  | 0.96759033203125 |
| NODE403X | GENE589X  | GENE588X  | 0.96759033203125 |
| NODE404X | NODE204X  | GENE2120X | 0.96759033203125 |
| NODE405X | NODE164X  | GENE100X  | 0.967529296875   |
| NODE406X | GENE587X  | NODE200X  | 0.96746826171875 |
| NODE407X | NODE308X  | GENE41X   | 0.96734619140625 |
| NODE408X | GENE329X  | NODE130X  | 0.96734619140625 |
| NODE409X | GENE342X  | GENE341X  | 0.96734619140625 |
| NODE410X | GENE252X  | NODE283X  | 0.96722412109375 |
| NODE411X | GENE828X  | GENE827X  | 0.96722412109375 |
| NODE412X | GENE25X   | NODE114X  | 0.9671630859375  |
| NODE413X | NODE29X   | GENE2115X | 0.96710205078125 |
| NODE414X | GENE362X  | GENE361X  | 0.967041015625   |
| NODE415X | GENE328X  | GENE327X  | 0.96697998046875 |
| NODE416X | GENE223X  | GENE222X  | 0.966796875      |
| NODE417X | GENE1927X | GENE1926X | 0.966796875      |
| NODE418X | NODE201X  | NODE174X  | 0.966796875      |
| NODE419X | GENE2126X | GENE2125X | 0.96649169921875 |
| NODE420X | NODE291X  | NODE282X  | 0.96649169921875 |
| NODE421X | GENE2070X | GENE2069X | 0.9664306640625  |
| NODE422X | GENE979X  | GENE978X  | 0.96636962890625 |
| NODE423X | GENE2157X | GENE2156X | 0.96636962890625 |
| NODE424X | NODE203X  | NODE187X  | 0.96636962890625 |
| NODE425X | NODE182X  | NODE51X   | 0.96612548828125 |
| NODE426X | GENE2276X | GENE2275X | 0.966064453125   |
| NODE427X | GENE285X  | GENE284X  | 0.96600341796875 |
| NODE428X | NODE231X  | GENE70X   | 0.9659423828125  |
| NODE429X | GENE1681X | GENE1680X | 0.9659423828125  |
| NODE430X | NODE240X  | NODE258X  | 0.96588134765625 |
| NODE431X | GENE105X  | GENE104X  | 0.96575927734375 |
| NODE432X | GENE2365X | GENE2364X | 0.96575927734375 |
| NODE433X | GENE2483X | GENE2482X | 0.96575927734375 |
| NODE434X | NODE226X  | GENE93X   | 0.965576171875   |
| NODE435X | NODE355X  | GENE257X  | 0.965576171875   |
| NODE436X | NODE302X  | GENE291X  | 0.9654541015625  |
| NODE437X | NODE223X  | GENE888X  | 0.9654541015625  |
| NODE438X | GENE1333X | GENE1332X | 0.9654541015625  |
| NODE439X | NODE280X  | GENE553X  | 0.96539306640625 |
| NODE440X | NODE234X  | GENE1601X | 0.96539306640625 |
| NODE441X | GENE1659X | GENE1658X | 0.96539306640625 |
| NODE442X | GENE964X  | GENE3X    | 0.96527099609375 |
| NODE443X | GENE522X  | GENE521X  | 0.96527099609375 |
| NODE444X | GENE2497X | NODE95X   | 0.96527099609375 |
| NODE445X | GENE2442X | GENE2441X | 0.9652099609375  |
| NODE446X | GENE2527X | GENE2526X | 0.96514892578125 |
| NODE447X | NODE370X  | NODE134X  | 0.9649658203125  |
| NODE448X | NODE171X  | NODE196X  | 0.96478271484375 |
| NODE449X | NODE245X  | NODE254X  | 0.96478271484375 |
| NODE450X | GENE349X  | GENE348X  | 0.9647216796875  |
| NODE451X | GENE598X  | GENE597X  | 0.96466064453125 |
| NODE452X | GENE2360X | GENE2359X | 0.964599609375   |
| NODE453X | GENE2377X | GENE2376X | 0.96453857421875 |
| NODE454X | GENE2560X | GENE2559X | 0.96453857421875 |
| NODE455X | GENE794X  | NODE163X  | 0.96441650390625 |
| NODE456X | GENE2124X | GENE2112X | 0.96441650390625 |



|          |           |           |                  |
|----------|-----------|-----------|------------------|
| NODE457X | GENE378X  | GENE377X  | 0.96435546875    |
| NODE458X | GENE194X  | NODE287X  | 0.96429443359375 |
| NODE459X | NODE285X  | NODE221X  | 0.96429443359375 |
| NODE460X | GENE103X  | NODE237X  | 0.964111328125   |
| NODE461X | GENE2119X | GENE2118X | 0.964111328125   |
| NODE462X | GENE173X  | GENE172X  | 0.96405029296875 |
| NODE463X | GENE2107X | GENE2106X | 0.9639892578125  |
| NODE464X | NODE322X  | NODE316X  | 0.96392822265625 |
| NODE465X | GENE253X  | NODE166X  | 0.9638671875     |
| NODE466X | NODE327X  | GENE963X  | 0.9638671875     |
| NODE467X | GENE2546X | GENE2545X | 0.96380615234375 |
| NODE468X | GENE407X  | NODE348X  | 0.9637451171875  |
| NODE469X | GENE1162X | GENE1161X | 0.9637451171875  |
| NODE470X | NODE172X  | NODE145X  | 0.9637451171875  |
| NODE471X | GENE261X  | GENE88X   | 0.96368408203125 |
| NODE472X | GENE332X  | GENE331X  | 0.96368408203125 |
| NODE473X | GENE1947X | GENE1946X | 0.96368408203125 |
| NODE474X | GENE2449X | GENE2310X | 0.96368408203125 |
| NODE475X | GENE2380X | GENE2379X | 0.96368408203125 |
| NODE476X | GENE1666X | GENE1665X | 0.963623046875   |
| NODE477X | GENE490X  | GENE489X  | 0.96356201171875 |
| NODE478X | NODE198X  | GENE2127X | 0.9635009765625  |
| NODE479X | GENE2463X | NODE2X    | 0.96337890625    |
| NODE480X | GENE1754X | GENE1753X | 0.96331787109375 |
| NODE481X | GENE2101X | GENE2100X | 0.96331787109375 |
| NODE482X | GENE2123X | NODE261X  | 0.96331787109375 |
| NODE483X | GENE901X  | GENE900X  | 0.9632568359375  |
| NODE484X | GENE593X  | NODE393X  | 0.9632568359375  |
| NODE485X | GENE927X  | GENE926X  | 0.963134765625   |
| NODE486X | GENE191X  | GENE189X  | 0.9630126953125  |
| NODE487X | GENE245X  | NODE265X  | 0.9630126953125  |
| NODE488X | GENE1701X | GENE1700X | 0.96295166015625 |
| NODE489X | GENE2490X | NODE10X   | 0.9627685546875  |
| NODE490X | GENE1232X | GENE1231X | 0.96270751953125 |
| NODE491X | NODE100X  | GENE2450X | 0.96270751953125 |
| NODE492X | GENE2142X | GENE2141X | 0.962646484375   |
| NODE493X | NODE36X   | GENE2388X | 0.962646484375   |
| NODE494X | NODE279X  | NODE338X  | 0.962646484375   |
| NODE495X | NODE441X  | GENE1657X | 0.962646484375   |
| NODE496X | GENE616X  | GENE615X  | 0.96258544921875 |
| NODE497X | NODE328X  | GENE2485X | 0.96258544921875 |
| NODE498X | NODE329X  | NODE366X  | 0.96258544921875 |
| NODE499X | GENE826X  | NODE295X  | 0.96246337890625 |
| NODE500X | GENE2375X | NODE272X  | 0.96234130859375 |
| NODE501X | GENE2502X | GENE2501X | 0.96234130859375 |
| NODE502X | GENE2576X | GENE2575X | 0.96234130859375 |
| NODE503X | GENE2670X | GENE2669X | 0.96221923828125 |
| NODE504X | GENE12X   | GENE11X   | 0.96209716796875 |
| NODE505X | GENE98X   | NODE257X  | 0.96209716796875 |
| NODE506X | GENE564X  | GENE563X  | 0.96209716796875 |
| NODE507X | NODE249X  | NODE225X  | 0.96209716796875 |
| NODE508X | GENE730X  | GENE729X  | 0.9620361328125  |
| NODE509X | GENE1579X | GENE1578X | 0.96197509765625 |
| NODE510X | GENE301X  | NODE267X  | 0.96185302734375 |
| NODE511X | NODE418X  | NODE342X  | 0.9617919921875  |
| NODE512X | GENE552X  | GENE551X  | 0.961669921875   |
| NODE513X | GENE1207X | GENE1206X | 0.961669921875   |

|          |           |           |                  |
|----------|-----------|-----------|------------------|
| NODE514X | NODE424X  | NODE353X  | 0.961669921875   |
| NODE515X | GENE2530X | GENE2529X | 0.96148681640625 |
| NODE516X | GENE366X  | GENE365X  | 0.96142578125    |
| NODE517X | GENE2351X | GENE2350X | 0.96136474609375 |
| NODE518X | GENE582X  | GENE310X  | 0.9613037109375  |
| NODE519X | GENE596X  | GENE595X  | 0.96112060546875 |
| NODE520X | GENE412X  | NODE402X  | 0.96112060546875 |
| NODE521X | NODE305X  | NODE372X  | 0.9610595703125  |
| NODE522X | GENE2290X | GENE2289X | 0.9609375        |
| NODE523X | NODE299X  | GENE158X  | 0.96087646484375 |
| NODE524X | GENE2577X | NODE502X  | 0.9608154296875  |
| NODE525X | GENE652X  | GENE580X  | 0.96075439453125 |
| NODE526X | GENE16X   | NODE301X  | 0.960693359375   |
| NODE527X | GENE472X  | GENE471X  | 0.960693359375   |
| NODE528X | GENE2644X | NODE332X  | 0.960693359375   |
| NODE529X | NODE410X  | NODE152X  | 0.96063232421875 |
| NODE530X | GENE322X  | GENE321X  | 0.9605712890625  |
| NODE531X | GENE2053X | GENE2052X | 0.96051025390625 |
| NODE532X | NODE263X  | GENE32X   | 0.96044921875    |
| NODE533X | GENE476X  | GENE475X  | 0.96044921875    |
| NODE534X | GENE1736X | GENE1735X | 0.96026611328125 |
| NODE535X | GENE1747X | NODE177X  | 0.96026611328125 |
| NODE536X | NODE243X  | NODE325X  | 0.960205078125   |
| NODE537X | NODE415X  | GENE326X  | 0.9600830078125  |
| NODE538X | GENE558X  | GENE557X  | 0.96002197265625 |
| NODE539X | NODE320X  | NODE63X   | 0.9599609375     |
| NODE540X | NODE364X  | GENE2108X | 0.9598388671875  |
| NODE541X | NODE269X  | NODE106X  | 0.9598388671875  |
| NODE542X | NODE408X  | NODE384X  | 0.95977783203125 |
| NODE543X | GENE467X  | GENE466X  | 0.959716796875   |
| NODE544X | NODE216X  | GENE280X  | 0.95953369140625 |
| NODE545X | GENE2477X | NODE330X  | 0.95947265625    |
| NODE546X | NODE266X  | GENE81X   | 0.95941162109375 |
| NODE547X | GENE1758X | GENE1757X | 0.95941162109375 |
| NODE548X | GENE862X  | GENE861X  | 0.9593505859375  |
| NODE549X | GENE829X  | NODE411X  | 0.95928955078125 |
| NODE550X | GENE442X  | GENE441X  | 0.9591064453125  |
| NODE551X | GENE1534X | NODE274X  | 0.958984375      |
| NODE552X | GENE2333X | GENE2332X | 0.9588623046875  |
| NODE553X | GENE535X  | GENE534X  | 0.95880126953125 |
| NODE554X | GENE1576X | GENE1570X | 0.95867919921875 |
| NODE555X | NODE248X  | NODE323X  | 0.95867919921875 |
| NODE556X | GENE2610X | GENE2609X | 0.95849609375    |
| NODE557X | GENE316X  | GENE315X  | 0.95831298828125 |
| NODE558X | GENE454X  | GENE453X  | 0.95819091796875 |
| NODE559X | GENE2438X | GENE2437X | 0.95819091796875 |
| NODE560X | GENE2633X | GENE2632X | 0.95819091796875 |
| NODE561X | NODE250X  | GENE343X  | 0.95806884765625 |
| NODE562X | GENE445X  | GENE444X  | 0.95806884765625 |
| NODE563X | GENE2523X | GENE2522X | 0.9580078125     |
| NODE564X | NODE358X  | NODE559X  | 0.9580078125     |
| NODE565X | NODE242X  | GENE2111X | 0.95782470703125 |
| NODE566X | GENE244X  | NODE487X  | 0.95782470703125 |
| NODE567X | GENE1646X | GENE1645X | 0.957763671875   |
| NODE568X | GENE2321X | GENE2320X | 0.957763671875   |
| NODE569X | GENE2323X | GENE2322X | 0.957763671875   |
| NODE570X | GENE2552X | GENE2551X | 0.957763671875   |

|          |           |           |                  |
|----------|-----------|-----------|------------------|
| NODE571X | NODE346X  | NODE448X  | 0.95770263671875 |
| NODE572X | GENE968X  | GENE967X  | 0.9576416015625  |
| NODE573X | NODE449X  | NODE215X  | 0.9576416015625  |
| NODE574X | GENE352X  | NODE382X  | 0.95758056640625 |
| NODE575X | GENE2355X | GENE2354X | 0.95758056640625 |
| NODE576X | GENE414X  | GENE413X  | 0.95751953125    |
| NODE577X | GENE2155X | NODE288X  | 0.95751953125    |
| NODE578X | GENE31X   | GENE30X   | 0.9573974609375  |
| NODE579X | GENE2652X | GENE2651X | 0.9573974609375  |
| NODE580X | GENE2445X | NODE536X  | 0.9573974609375  |
| NODE581X | GENE1012X | GENE1011X | 0.95733642578125 |
| NODE582X | GENE2539X | GENE2538X | 0.9571533203125  |
| NODE583X | NODE406X  | NODE336X  | 0.9571533203125  |
| NODE584X | NODE427X  | GENE283X  | 0.9571533203125  |
| NODE585X | GENE226X  | NODE340X  | 0.95709228515625 |
| NODE586X | GENE459X  | GENE455X  | 0.95709228515625 |
| NODE587X | GENE354X  | GENE353X  | 0.95703125       |
| NODE588X | NODE118X  | NODE264X  | 0.95697021484375 |
| NODE589X | GENE2272X | GENE2271X | 0.9569091796875  |
| NODE590X | NODE405X  | GENE99X   | 0.95684814453125 |
| NODE591X | GENE182X  | NODE314X  | 0.956787109375   |
| NODE592X | NODE470X  | NODE206X  | 0.956787109375   |
| NODE593X | NODE503X  | GENE2668X | 0.9566650390625  |
| NODE594X | GENE21X   | GENE20X   | 0.95654296875    |
| NODE595X | NODE373X  | GENE218X  | 0.95648193359375 |
| NODE596X | GENE657X  | GENE656X  | 0.9564208984375  |
| NODE597X | NODE430X  | NODE447X  | 0.95623779296875 |
| NODE598X | GENE230X  | GENE229X  | 0.95611572265625 |
| NODE599X | GENE2500X | NODE334X  | 0.95611572265625 |
| NODE600X | NODE13X   | GENE2329X | 0.9559326171875  |
| NODE601X | NODE148X  | NODE396X  | 0.9559326171875  |
| NODE602X | NODE389X  | NODE218X  | 0.9559326171875  |
| NODE603X | GENE655X  | GENE654X  | 0.95587158203125 |
| NODE604X | GENE308X  | GENE307X  | 0.955810546875   |
| NODE605X | GENE2505X | GENE2504X | 0.95574951171875 |
| NODE606X | NODE444X  | GENE2494X | 0.9556884765625  |
| NODE607X | GENE363X  | NODE414X  | 0.95562744140625 |
| NODE608X | NODE307X  | NODE359X  | 0.95550537109375 |
| NODE609X | NODE398X  | GENE162X  | 0.9554443359375  |
| NODE610X | GENE1489X | GENE1488X | 0.9554443359375  |
| NODE611X | GENE2144X | GENE2143X | 0.9554443359375  |
| NODE612X | NODE260X  | GENE2453X | 0.95538330078125 |
| NODE613X | GENE957X  | NODE61X   | 0.955322265625   |
| NODE614X | GENE267X  | NODE284X  | 0.95526123046875 |
| NODE615X | GENE896X  | NODE399X  | 0.95526123046875 |
| NODE616X | GENE2363X | GENE2362X | 0.95526123046875 |
| NODE617X | NODE356X  | NODE292X  | 0.9552001953125  |
| NODE618X | GENE510X  | NODE179X  | 0.95513916015625 |
| NODE619X | GENE2342X | GENE2341X | 0.95513916015625 |
| NODE620X | GENE2518X | GENE2319X | 0.9549560546875  |
| NODE621X | GENE2672X | GENE2671X | 0.9549560546875  |
| NODE622X | NODE530X  | GENE13X   | 0.9549560546875  |
| NODE623X | GENE1679X | GENE1678X | 0.954833984375   |
| NODE624X | GENE618X  | GENE617X  | 0.95477294921875 |
| NODE625X | NODE255X  | NODE495X  | 0.95477294921875 |
| NODE626X | GENE1181X | GENE1180X | 0.95465087890625 |
| NODE627X | GENE2370X | GENE2369X | 0.95465087890625 |

|          |           |           |                  |
|----------|-----------|-----------|------------------|
| NODE628X | NODE494X  | NODE354X  | 0.95458984375    |
| NODE629X | GENE320X  | NODE268X  | 0.95452880859375 |
| NODE630X | NODE437X  | GENE887X  | 0.95452880859375 |
| NODE631X | NODE400X  | GENE1972X | 0.95452880859375 |
| NODE632X | GENE336X  | NODE173X  | 0.9544677734375  |
| NODE633X | NODE311X  | GENE358X  | 0.9544677734375  |
| NODE634X | GENE356X  | GENE355X  | 0.95440673828125 |
| NODE635X | GENE2458X | GENE2457X | 0.95440673828125 |
| NODE636X | GENE371X  | NODE390X  | 0.954345703125   |
| NODE637X | GENE2416X | GENE2415X | 0.954345703125   |
| NODE638X | NODE339X  | NODE428X  | 0.954345703125   |
| NODE639X | NODE214X  | GENE2613X | 0.95428466796875 |
| NODE640X | NODE544X  | GENE478X  | 0.95416259765625 |
| NODE641X | NODE404X  | NODE456X  | 0.9539794921875  |
| NODE642X | GENE381X  | GENE380X  | 0.95391845703125 |
| NODE643X | GENE1624X | GENE1623X | 0.953857421875   |
| NODE644X | NODE337X  | GENE2150X | 0.9537353515625  |
| NODE645X | GENE1612X | NODE361X  | 0.95367431640625 |
| NODE646X | NODE205X  | NODE278X  | 0.95361328125    |
| NODE647X | NODE362X  | GENE2491X | 0.95355224609375 |
| NODE648X | NODE350X  | NODE367X  | 0.9534912109375  |
| NODE649X | NODE160X  | GENE2593X | 0.953369140625   |
| NODE650X | NODE420X  | GENE63X   | 0.9532470703125  |
| NODE651X | GENE607X  | GENE594X  | 0.95318603515625 |
| NODE652X | GENE1853X | GENE1852X | 0.9530029296875  |
| NODE653X | NODE360X  | GENE1572X | 0.9530029296875  |
| NODE654X | GENE186X  | NODE392X  | 0.95294189453125 |
| NODE655X | GENE217X  | GENE216X  | 0.95294189453125 |
| NODE656X | NODE539X  | GENE1590X | 0.952880859375   |
| NODE657X | GENE2353X | GENE2352X | 0.9527587890625  |
| NODE658X | GENE483X  | GENE482X  | 0.95257568359375 |
| NODE659X | GENE2471X | GENE2470X | 0.952392578125   |
| NODE660X | GENE2667X | GENE2517X | 0.95233154296875 |
| NODE661X | GENE2398X | GENE2397X | 0.9522705078125  |
| NODE662X | GENE452X  | GENE451X  | 0.95220947265625 |
| NODE663X | GENE1581X | GENE1580X | 0.95220947265625 |
| NODE664X | NODE455X  | NODE253X  | 0.9521484375     |
| NODE665X | GENE2346X | GENE2345X | 0.9520263671875  |
| NODE666X | GENE2358X | GENE2357X | 0.9520263671875  |
| NODE667X | NODE450X  | GENE347X  | 0.95196533203125 |
| NODE668X | GENE1479X | GENE1478X | 0.95196533203125 |
| NODE669X | GENE370X  | GENE369X  | 0.9517822265625  |
| NODE670X | GENE1916X | GENE1915X | 0.95159912109375 |
| NODE671X | NODE434X  | NODE290X  | 0.95147705078125 |
| NODE672X | GENE663X  | GENE662X  | 0.951416015625   |
| NODE673X | GENE2229X | GENE2228X | 0.951416015625   |
| NODE674X | GENE2460X | GENE2459X | 0.951416015625   |
| NODE675X | GENE653X  | GENE650X  | 0.95135498046875 |
| NODE676X | GENE1742X | GENE1741X | 0.95135498046875 |
| NODE677X | GENE2503X | NODE501X  | 0.95135498046875 |
| NODE678X | GENE542X  | GENE541X  | 0.951171875      |
| NODE679X | GENE2603X | GENE2602X | 0.951171875      |
| NODE680X | GENE2349X | NODE115X  | 0.9510498046875  |
| NODE681X | GENE1618X | NODE281X  | 0.95098876953125 |
| NODE682X | NODE383X  | NODE378X  | 0.95098876953125 |
| NODE683X | GENE439X  | NODE303X  | 0.950927734375   |
| NODE684X | GENE930X  | NODE347X  | 0.9508056640625  |

|          |           |           |                  |
|----------|-----------|-----------|------------------|
| NODE685X | GENE338X  | GENE337X  | 0.95074462890625 |
| NODE686X | GENE2638X | GENE2637X | 0.95068359375    |
| NODE687X | NODE377X  | NODE407X  | 0.95062255859375 |
| NODE688X | GENE909X  | NODE518X  | 0.9505615234375  |
| NODE689X | GENE432X  | GENE431X  | 0.95050048828125 |
| NODE690X | GENE2239X | GENE2165X | 0.950439453125   |
| NODE691X | GENE498X  | GENE497X  | 0.95037841796875 |
| NODE692X | GENE2055X | GENE2054X | 0.95037841796875 |
| NODE693X | NODE319X  | NODE460X  | 0.9503173828125  |
| NODE694X | NODE465X  | NODE386X  | 0.9503173828125  |
| NODE695X | GENE259X  | GENE258X  | 0.95025634765625 |
| NODE696X | NODE210X  | GENE1921X | 0.95025634765625 |
| NODE697X | NODE375X  | GENE2064X | 0.95025634765625 |
| NODE698X | GENE2297X | GENE2296X | 0.95025634765625 |
| NODE699X | GENE2528X | GENE1798X | 0.9501953125     |
| NODE700X | GENE2147X | GENE2146X | 0.9501953125     |
| NODE701X | NODE442X  | NODE394X  | 0.9501953125     |
| NODE702X | GENE2008X | GENE2007X | 0.95013427734375 |
| NODE703X | GENE1644X | GENE1643X | 0.95001220703125 |
| NODE704X | NODE425X  | NODE511X  | 0.949951171875   |
| NODE705X | NODE435X  | NODE529X  | 0.9498291015625  |
| NODE706X | NODE357X  | NODE640X  | 0.94964599609375 |
| NODE707X | GENE732X  | GENE333X  | 0.9495849609375  |
| NODE708X | GENE1040X | GENE1039X | 0.949462890625   |
| NODE709X | GENE1065X | GENE1064X | 0.94940185546875 |
| NODE710X | GENE2215X | GENE2214X | 0.94927978515625 |
| NODE711X | GENE1672X | GENE1671X | 0.94921875       |
| NODE712X | GENE243X  | NODE228X  | 0.94903564453125 |
| NODE713X | GENE1724X | GENE1723X | 0.94903564453125 |
| NODE714X | GENE2673X | NODE621X  | 0.948974609375   |
| NODE715X | GENE461X  | NODE542X  | 0.9488525390625  |
| NODE716X | NODE493X  | GENE2387X | 0.94873046875    |
| NODE717X | GENE1143X | GENE599X  | 0.9486083984375  |
| NODE718X | GENE306X  | NODE601X  | 0.9486083984375  |
| NODE719X | GENE928X  | NODE485X  | 0.94854736328125 |
| NODE720X | GENE1176X | GENE1175X | 0.94854736328125 |
| NODE721X | GENE1901X | GENE1900X | 0.94854736328125 |
| NODE722X | GENE2525X | GENE2524X | 0.94854736328125 |
| NODE723X | GENE443X  | NODE550X  | 0.94830322265625 |
| NODE724X | GENE374X  | GENE373X  | 0.94818115234375 |
| NODE725X | GENE2092X | GENE2091X | 0.9481201171875  |
| NODE726X | GENE864X  | GENE863X  | 0.94805908203125 |
| NODE727X | NODE512X  | NODE312X  | 0.947998046875   |
| NODE728X | GENE540X  | GENE539X  | 0.9478759765625  |
| NODE729X | NODE413X  | NODE565X  | 0.94781494140625 |
| NODE730X | NODE538X  | NODE439X  | 0.94781494140625 |
| NODE731X | GENE2005X | GENE2004X | 0.94775390625    |
| NODE732X | GENE2269X | GENE2019X | 0.94775390625    |
| NODE733X | NODE241X  | NODE431X  | 0.94769287109375 |
| NODE734X | NODE298X  | GENE0X    | 0.94757080078125 |
| NODE735X | GENE2076X | GENE2075X | 0.9473876953125  |
| NODE736X | GENE227X  | NODE365X  | 0.947265625      |
| NODE737X | GENE2048X | GENE2047X | 0.947265625      |
| NODE738X | NODE421X  | GENE2068X | 0.947265625      |
| NODE739X | GENE2589X | GENE2588X | 0.9471435546875  |
| NODE740X | GENE247X  | NODE566X  | 0.94696044921875 |
| NODE741X | GENE633X  | GENE632X  | 0.94696044921875 |

|          |           |           |                  |
|----------|-----------|-----------|------------------|
| NODE742X | NODE251X  | NODE523X  | 0.94696044921875 |
| NODE743X | GENE62X   | NODE289X  | 0.94683837890625 |
| NODE744X | NODE684X  | NODE724X  | 0.94683837890625 |
| NODE745X | GENE26X   | NODE412X  | 0.94671630859375 |
| NODE746X | NODE500X  | GENE2372X | 0.9466552734375  |
| NODE747X | NODE239X  | GENE1300X | 0.9466552734375  |
| NODE748X | GENE855X  | GENE854X  | 0.946533203125   |
| NODE749X | GENE1337X | GENE1336X | 0.946533203125   |
| NODE750X | NODE65X   | GENE2073X | 0.946533203125   |
| NODE751X | GENE2655X | GENE2654X | 0.946533203125   |
| NODE752X | NODE671X  | NODE458X  | 0.946533203125   |
| NODE753X | GENE2010X | GENE2009X | 0.9464111328125  |
| NODE754X | GENE2507X | GENE2506X | 0.9462890625     |
| NODE755X | GENE2140X | NODE286X  | 0.9461669921875  |
| NODE756X | GENE2247X | GENE2246X | 0.9461669921875  |
| NODE757X | GENE1530X | GENE1529X | 0.94610595703125 |
| NODE758X | GENE571X  | GENE570X  | 0.94598388671875 |
| NODE759X | NODE401X  | NODE376X  | 0.94598388671875 |
| NODE760X | NODE397X  | GENE559X  | 0.9459228515625  |
| NODE761X | GENE911X  | GENE910X  | 0.9459228515625  |
| NODE762X | GENE1608X | GENE1607X | 0.9459228515625  |
| NODE763X | GENE1656X | GENE1655X | 0.94573974609375 |
| NODE764X | NODE464X  | NODE514X  | 0.94573974609375 |
| NODE765X | GENE1172X | GENE1171X | 0.9456787109375  |
| NODE766X | GENE2258X | GENE2257X | 0.9456787109375  |
| NODE767X | NODE478X  | GENE2128X | 0.94561767578125 |
| NODE768X | GENE2571X | GENE2570X | 0.94549560546875 |
| NODE769X | NODE638X  | NODE650X  | 0.94537353515625 |
| NODE770X | GENE1737X | NODE534X  | 0.94525146484375 |
| NODE771X | NODE462X  | NODE259X  | 0.9451904296875  |
| NODE772X | GENE1650X | NODE202X  | 0.94512939453125 |
| NODE773X | GENE721X  | GENE720X  | 0.945068359375   |
| NODE774X | NODE416X  | GENE221X  | 0.94500732421875 |
| NODE775X | NODE388X  | GENE868X  | 0.94500732421875 |
| NODE776X | NODE555X  | NODE459X  | 0.94500732421875 |
| NODE777X | NODE608X  | NODE595X  | 0.9449462890625  |
| NODE778X | GENE925X  | GENE924X  | 0.94476318359375 |
| NODE779X | GENE36X   | NODE532X  | 0.94464111328125 |
| NODE780X | GENE2640X | GENE2639X | 0.94464111328125 |
| NODE781X | GENE2625X | GENE2624X | 0.944580078125   |
| NODE782X | GENE2231X | NODE690X  | 0.944580078125   |
| NODE783X | GENE1733X | GENE1732X | 0.94451904296875 |
| NODE784X | GENE2378X | NODE453X  | 0.94451904296875 |
| NODE785X | GENE851X  | GENE623X  | 0.9444580078125  |
| NODE786X | GENE2586X | GENE2585X | 0.9444580078125  |
| NODE787X | NODE468X  | NODE733X  | 0.9444580078125  |
| NODE788X | GENE2081X | GENE2080X | 0.94439697265625 |
| NODE789X | GENE260X  | NODE471X  | 0.9443359375     |
| NODE790X | NODE645X  | GENE1609X | 0.9443359375     |
| NODE791X | GENE421X  | GENE420X  | 0.94427490234375 |
| NODE792X | NODE349X  | NODE558X  | 0.94415283203125 |
| NODE793X | NODE343X  | GENE17X   | 0.944091796875   |
| NODE794X | GENE869X  | GENE867X  | 0.94403076171875 |
| NODE795X | GENE2384X | GENE2383X | 0.94403076171875 |
| NODE796X | GENE2515X | NODE252X  | 0.94403076171875 |
| NODE797X | NODE369X  | GENE1613X | 0.9439697265625  |
| NODE798X | GENE256X  | GENE255X  | 0.94390869140625 |

|          |           |           |                  |
|----------|-----------|-----------|------------------|
| NODE799X | NODE409X  | GENE340X  | 0.94390869140625 |
| NODE800X | GENE1002X | GENE1001X | 0.94390869140625 |
| NODE801X | GENE1756X | GENE1755X | 0.94384765625    |
| NODE802X | GENE1654X | GENE1653X | 0.9437255859375  |
| NODE803X | NODE273X  | NODE333X  | 0.94366455078125 |
| NODE804X | GENE576X  | GENE575X  | 0.943603515625   |
| NODE805X | GENE2569X | GENE2568X | 0.9434814453125  |
| NODE806X | GENE434X  | GENE433X  | 0.943359375      |
| NODE807X | NODE649X  | NODE331X  | 0.943359375      |
| NODE808X | NODE545X  | GENE2474X | 0.94329833984375 |
| NODE809X | NODE419X  | NODE482X  | 0.94329833984375 |
| NODE810X | GENE602X  | NODE651X  | 0.94317626953125 |
| NODE811X | GENE590X  | NODE403X  | 0.94305419921875 |
| NODE812X | GENE628X  | GENE627X  | 0.94305419921875 |
| NODE813X | GENE1380X | GENE1379X | 0.94305419921875 |
| NODE814X | GENE2511X | GENE2510X | 0.94305419921875 |
| NODE815X | GENE2645X | NODE528X  | 0.94293212890625 |
| NODE816X | NODE686X  | GENE2636X | 0.94293212890625 |
| NODE817X | GENE544X  | GENE543X  | 0.9427490234375  |
| NODE818X | GENE2102X | NODE481X  | 0.9427490234375  |
| NODE819X | NODE525X  | NODE321X  | 0.9427490234375  |
| NODE820X | GENE1633X | GENE1632X | 0.94268798828125 |
| NODE821X | GENE2277X | NODE306X  | 0.94268798828125 |
| NODE822X | NODE497X  | GENE2484X | 0.94268798828125 |
| NODE823X | GENE1638X | GENE1637X | 0.942626953125   |
| NODE824X | GENE619X  | NODE624X  | 0.94256591796875 |
| NODE825X | GENE1668X | GENE1667X | 0.9425048828125  |
| NODE826X | GENE2659X | NODE345X  | 0.9425048828125  |
| NODE827X | NODE679X  | GENE2601X | 0.9423828125     |
| NODE828X | NODE294X  | GENE279X  | 0.942138671875   |
| NODE829X | GENE2386X | GENE2385X | 0.942138671875   |
| NODE830X | GENE2481X | GENE1674X | 0.9420166015625  |
| NODE831X | GENE1955X | GENE1954X | 0.9420166015625  |
| NODE832X | GENE853X  | GENE852X  | 0.94195556640625 |
| NODE833X | NODE208X  | NODE474X  | 0.94183349609375 |
| NODE834X | GENE1969X | GENE1968X | 0.9417724609375  |
| NODE835X | NODE582X  | GENE2537X | 0.94171142578125 |
| NODE836X | NODE429X  | NODE623X  | 0.94134521484375 |
| NODE837X | GENE2536X | GENE2535X | 0.9412841796875  |
| NODE838X | NODE310X  | NODE537X  | 0.94122314453125 |
| NODE839X | NODE687X  | NODE526X  | 0.94122314453125 |
| NODE840X | GENE389X  | GENE388X  | 0.941162109375   |
| NODE841X | GENE962X  | GENE961X  | 0.9410400390625  |
| NODE842X | GENE2382X | GENE2381X | 0.9410400390625  |
| NODE843X | GENE2344X | NODE391X  | 0.94097900390625 |
| NODE844X | GENE465X  | GENE464X  | 0.94091796875    |
| NODE845X | GENE2480X | NODE122X  | 0.94091796875    |
| NODE846X | GENE357X  | NODE634X  | 0.94085693359375 |
| NODE847X | GENE2544X | GENE2542X | 0.94085693359375 |
| NODE848X | NODE315X  | GENE2325X | 0.9407958984375  |
| NODE849X | NODE524X  | GENE2574X | 0.9407958984375  |
| NODE850X | GENE1335X | GENE1334X | 0.940673828125   |
| NODE851X | GENE929X  | GENE344X  | 0.94061279296875 |
| NODE852X | NODE546X  | NODE602X  | 0.94061279296875 |
| NODE853X | GENE1342X | GENE1341X | 0.94049072265625 |
| NODE854X | NODE648X  | NODE541X  | 0.9404296875     |
| NODE855X | GENE2361X | NODE452X  | 0.9403076171875  |

|          |           |           |                  |
|----------|-----------|-----------|------------------|
| NODE856X | NODE637X  | GENE2414X | 0.940185546875   |
| NODE857X | GENE2410X | GENE2409X | 0.9400634765625  |
| NODE858X | GENE458X  | NODE586X  | 0.94000244140625 |
| NODE859X | GENE704X  | GENE703X  | 0.93988037109375 |
| NODE860X | GENE969X  | NODE466X  | 0.93988037109375 |
| NODE861X | NODE561X  | NODE527X  | 0.93988037109375 |
| NODE862X | NODE180X  | GENE367X  | 0.93975830078125 |
| NODE863X | GENE660X  | GENE659X  | 0.93963623046875 |
| NODE864X | GENE2600X | GENE2599X | 0.9395751953125  |
| NODE865X | GENE1186X | GENE1185X | 0.93951416015625 |
| NODE866X | NODE717X  | NODE451X  | 0.93951416015625 |
| NODE867X | GENE309X  | NODE604X  | 0.93939208984375 |
| NODE868X | GENE2212X | GENE2211X | 0.9393310546875  |
| NODE869X | GENE2270X | GENE1998X | 0.93927001953125 |
| NODE870X | GENE364X  | NODE607X  | 0.93927001953125 |
| NODE871X | NODE297X  | NODE479X  | 0.939208984375   |
| NODE872X | NODE705X  | NODE583X  | 0.939208984375   |
| NODE873X | GENE1126X | GENE1125X | 0.93914794921875 |
| NODE874X | GENE1364X | GENE1363X | 0.93914794921875 |
| NODE875X | GENE921X  | GENE920X  | 0.93902587890625 |
| NODE876X | NODE445X  | NODE564X  | 0.93902587890625 |
| NODE877X | GENE986X  | GENE985X  | 0.93896484375    |
| NODE878X | GENE1690X | GENE1689X | 0.93896484375    |
| NODE879X | GENE313X  | GENE312X  | 0.93890380859375 |
| NODE880X | NODE594X  | NODE793X  | 0.93890380859375 |
| NODE881X | NODE644X  | NODE344X  | 0.93878173828125 |
| NODE882X | GENE1024X | NODE293X  | 0.938720703125   |
| NODE883X | NODE476X  | NODE276X  | 0.938720703125   |
| NODE884X | GENE1750X | GENE1749X | 0.93853759765625 |
| NODE885X | NODE296X  | GENE2105X | 0.93853759765625 |
| NODE886X | GENE2356X | NODE575X  | 0.93853759765625 |
| NODE887X | NODE229X  | GENE2335X | 0.93841552734375 |
| NODE888X | GENE177X  | GENE176X  | 0.9383544921875  |
| NODE889X | NODE486X  | NODE742X  | 0.9383544921875  |
| NODE890X | GENE2223X | GENE2222X | 0.93829345703125 |
| NODE891X | GENE28X   | GENE27X   | 0.9381103515625  |
| NODE892X | GENE1605X | GENE1604X | 0.93798828125    |
| NODE893X | NODE549X  | NODE499X  | 0.9378662109375  |
| NODE894X | NODE300X  | NODE584X  | 0.9378662109375  |
| NODE895X | GENE625X  | GENE624X  | 0.93768310546875 |
| NODE896X | GENE425X  | GENE424X  | 0.9376220703125  |
| NODE897X | GENE2238X | GENE2237X | 0.9376220703125  |
| NODE898X | NODE433X  | NODE491X  | 0.9376220703125  |
| NODE899X | NODE335X  | GENE2516X | 0.93756103515625 |
| NODE900X | NODE628X  | NODE655X  | 0.93756103515625 |
| NODE901X | NODE48X   | GENE2548X | 0.9375           |
| NODE902X | NODE675X  | NODE590X  | 0.9375           |
| NODE903X | GENE601X  | GENE600X  | 0.93743896484375 |
| NODE904X | NODE883X  | GENE1662X | 0.93743896484375 |
| NODE905X | GENE38X   | GENE37X   | 0.93731689453125 |
| NODE906X | GENE668X  | GENE667X  | 0.93731689453125 |
| NODE907X | GENE1081X | GENE1080X | 0.93731689453125 |
| NODE908X | GENE502X  | GENE501X  | 0.93719482421875 |
| NODE909X | GENE2062X | GENE2061X | 0.93719482421875 |
| NODE910X | NODE786X  | GENE2584X | 0.9371337890625  |
| NODE911X | GENE1264X | GENE1263X | 0.93707275390625 |
| NODE912X | NODE615X  | GENE892X  | 0.93695068359375 |



|          |           |           |                  |
|----------|-----------|-----------|------------------|
| NODE913X | GENE912X  | GENE886X  | 0.9368896484375  |
| NODE914X | NODE387X  | NODE576X  | 0.9368896484375  |
| NODE915X | GENE289X  | GENE288X  | 0.93682861328125 |
| NODE916X | GENE538X  | GENE537X  | 0.93670654296875 |
| NODE917X | GENE2104X | GENE2103X | 0.9366455078125  |
| NODE918X | NODE87X   | GENE1537X | 0.9366455078125  |
| NODE919X | NODE469X  | NODE617X  | 0.93658447265625 |
| NODE920X | GENE6X    | GENE5X    | 0.9365234375     |
| NODE921X | GENE500X  | GENE499X  | 0.9365234375     |
| NODE922X | GENE621X  | GENE620X  | 0.93646240234375 |
| NODE923X | GENE992X  | GENE991X  | 0.9364013671875  |
| NODE924X | NODE186X  | GENE1543X | 0.936279296875   |
| NODE925X | NODE498X  | NODE764X  | 0.936279296875   |
| NODE926X | NODE627X  | NODE380X  | 0.93585205078125 |
| NODE927X | GENE1731X | GENE1730X | 0.93572998046875 |
| NODE928X | NODE748X  | NODE533X  | 0.93572998046875 |
| NODE929X | NODE597X  | NODE776X  | 0.93572998046875 |
| NODE930X | NODE819X  | NODE588X  | 0.9356689453125  |
| NODE931X | GENE2199X | GENE2198X | 0.93560791015625 |
| NODE932X | NODE578X  | NODE504X  | 0.9354248046875  |
| NODE933X | GENE707X  | GENE706X  | 0.93536376953125 |
| NODE934X | GENE2255X | GENE2254X | 0.935302734375   |
| NODE935X | GENE954X  | GENE953X  | 0.93524169921875 |
| NODE936X | NODE766X  | GENE2256X | 0.93499755859375 |
| NODE937X | NODE423X  | NODE577X  | 0.93487548828125 |
| NODE938X | NODE520X  | NODE609X  | 0.93487548828125 |
| NODE939X | GENE419X  | NODE230X  | 0.934814453125   |
| NODE940X | GENE866X  | GENE865X  | 0.934814453125   |
| NODE941X | GENE906X  | GENE905X  | 0.93475341796875 |
| NODE942X | GENE2573X | GENE2572X | 0.93475341796875 |
| NODE943X | NODE510X  | NODE436X  | 0.9346923828125  |
| NODE944X | NODE685X  | NODE632X  | 0.9346923828125  |
| NODE945X | GENE1317X | GENE1316X | 0.93450927734375 |
| NODE946X | NODE569X  | NODE568X  | 0.93438720703125 |
| NODE947X | NODE598X  | GENE228X  | 0.9342041015625  |
| NODE948X | GENE1727X | GENE1726X | 0.9342041015625  |
| NODE949X | GENE1053X | GENE1052X | 0.93408203125    |
| NODE950X | NODE522X  | GENE2288X | 0.933837890625   |
| NODE951X | GENE918X  | GENE917X  | 0.9337158203125  |
| NODE952X | NODE682X  | NODE839X  | 0.9337158203125  |
| NODE953X | NODE620X  | GENE2318X | 0.93353271484375 |
| NODE954X | NODE480X  | NODE385X  | 0.9334716796875  |
| NODE955X | GENE1917X | NODE670X  | 0.933349609375   |
| NODE956X | GENE2509X | GENE2508X | 0.9332275390625  |
| NODE957X | NODE704X  | NODE571X  | 0.9332275390625  |
| NODE958X | GENE494X  | GENE493X  | 0.93310546875    |
| NODE959X | NODE618X  | GENE507X  | 0.93310546875    |
| NODE960X | NODE426X  | NODE463X  | 0.93304443359375 |
| NODE961X | NODE381X  | GENE2594X | 0.932861328125   |
| NODE962X | NODE758X  | GENE569X  | 0.932861328125   |
| NODE963X | GENE2233X | GENE2232X | 0.93280029296875 |
| NODE964X | NODE613X  | NODE775X  | 0.93280029296875 |
| NODE965X | NODE680X  | NODE665X  | 0.9327392578125  |
| NODE966X | NODE641X  | NODE461X  | 0.9324951171875  |
| NODE967X | GENE982X  | GENE981X  | 0.93243408203125 |
| NODE968X | GENE2017X | GENE2016X | 0.93243408203125 |
| NODE969X | GENE2038X | GENE2037X | 0.93243408203125 |

|           |           |           |                  |
|-----------|-----------|-----------|------------------|
| NODE970X  | NODE789X  | NODE693X  | 0.93243408203125 |
| NODE971X  | NODE492X  | NODE755X  | 0.932373046875   |
| NODE972X  | NODE681X  | NODE797X  | 0.93218994140625 |
| NODE973X  | NODE631X  | GENE1971X | 0.93206787109375 |
| NODE974X  | NODE277X  | NODE694X  | 0.93206787109375 |
| NODE975X  | NODE475X  | NODE784X  | 0.93206787109375 |
| NODE976X  | GENE2433X | GENE2432X | 0.9320068359375  |
| NODE977X  | GENE2662X | GENE2661X | 0.9320068359375  |
| NODE978X  | GENE658X  | NODE596X  | 0.9317626953125  |
| NODE979X  | NODE855X  | NODE440X  | 0.9317626953125  |
| NODE980X  | GENE523X  | NODE443X  | 0.9315185546875  |
| NODE981X  | GENE984X  | GENE983X  | 0.93145751953125 |
| NODE982X  | NODE838X  | NODE622X  | 0.93145751953125 |
| NODE983X  | NODE507X  | NODE664X  | 0.93115234375    |
| NODE984X  | GENE641X  | GENE640X  | 0.9310302734375  |
| NODE985X  | GENE2243X | GENE2241X | 0.93096923828125 |
| NODE986X  | NODE767X  | NODE696X  | 0.93084716796875 |
| NODE987X  | GENE2419X | GENE2224X | 0.93072509765625 |
| NODE988X  | NODE678X  | NODE728X  | 0.93072509765625 |
| NODE989X  | GENE513X  | GENE512X  | 0.9306640625     |
| NODE990X  | NODE185X  | NODE521X  | 0.9306640625     |
| NODE991X  | NODE567X  | NODE703X  | 0.9306640625     |
| NODE992X  | NODE552X  | NODE600X  | 0.93048095703125 |
| NODE993X  | NODE489X  | NODE822X  | 0.93035888671875 |
| NODE994X  | GENE1128X | GENE1127X | 0.93023681640625 |
| NODE995X  | NODE739X  | GENE2587X | 0.9300537109375  |
| NODE996X  | NODE654X  | NODE591X  | 0.929931640625   |
| NODE997X  | GENE1164X | GENE1163X | 0.92987060546875 |
| NODE998X  | GENE1710X | NODE26X   | 0.9296875        |
| NODE999X  | NODE190X  | GENE2621X | 0.92962646484375 |
| NODE1000X | NODE663X  | GENE1577X | 0.92962646484375 |
| NODE1001X | NODE477X  | GENE488X  | 0.92950439453125 |
| NODE1002X | GENE2512X | NODE814X  | 0.92950439453125 |
| NODE1003X | NODE572X  | NODE860X  | 0.9293212890625  |
| NODE1004X | GENE385X  | GENE384X  | 0.92926025390625 |
| NODE1005X | GENE2026X | GENE2025X | 0.92919921875    |
| NODE1006X | GENE1583X | GENE1571X | 0.928955078125   |
| NODE1007X | NODE363X  | GENE2099X | 0.928955078125   |
| NODE1008X | GENE1714X | GENE1713X | 0.92877197265625 |
| NODE1009X | NODE563X  | NODE899X  | 0.92877197265625 |
| NODE1010X | GENE468X  | NODE543X  | 0.9287109375     |
| NODE1011X | GENE731X  | NODE707X  | 0.9287109375     |
| NODE1012X | GENE2431X | GENE2428X | 0.92852783203125 |
| NODE1013X | GENE1139X | GENE1138X | 0.92803955078125 |
| NODE1014X | GENE1510X | GENE1509X | 0.927978515625   |
| NODE1015X | GENE1960X | GENE1959X | 0.927978515625   |
| NODE1016X | GENE891X  | NODE548X  | 0.92779541015625 |
| NODE1017X | GENE2089X | GENE2088X | 0.9276123046875  |
| NODE1018X | GENE971X  | GENE970X  | 0.92755126953125 |
| NODE1019X | GENE2266X | GENE2265X | 0.927490234375   |
| NODE1020X | GENE1582X | GENE1519X | 0.9273681640625  |
| NODE1021X | NODE890X  | GENE2221X | 0.9273681640625  |
| NODE1022X | NODE714X  | NODE593X  | 0.9273681640625  |
| NODE1023X | GENE449X  | GENE448X  | 0.92718505859375 |
| NODE1024X | GENE1586X | GENE1585X | 0.92718505859375 |
| NODE1025X | GENE1357X | GENE1356X | 0.92694091796875 |
| NODE1026X | NODE837X  | GENE2534X | 0.9268798828125  |

|           |           |           |                  |
|-----------|-----------|-----------|------------------|
| NODE1027X | GENE2581X | GENE2580X | 0.9267578125     |
| NODE1028X | NODE667X  | GENE346X  | 0.92657470703125 |
| NODE1029X | GENE1195X | GENE1194X | 0.926513671875   |
| NODE1030X | GENE1173X | NODE765X  | 0.926513671875   |
| NODE1031X | NODE982X  | NODE629X  | 0.9263916015625  |
| NODE1032X | GENE1980X | GENE1979X | 0.92633056640625 |
| NODE1033X | GENE2306X | NODE759X  | 0.92626953125    |
| NODE1034X | NODE506X  | NODE614X  | 0.9261474609375  |
| NODE1035X | GENE666X  | GENE644X  | 0.92608642578125 |
| NODE1036X | GENE1931X | GENE1930X | 0.92608642578125 |
| NODE1037X | GENE1722X | GENE1721X | 0.926025390625   |
| NODE1038X | GENE1168X | GENE1167X | 0.9259033203125  |
| NODE1039X | NODE795X  | NODE842X  | 0.9256591796875  |
| NODE1040X | GENE2635X | GENE2634X | 0.92559814453125 |
| NODE1041X | GENE1847X | GENE1846X | 0.9254150390625  |
| NODE1042X | NODE730X  | NODE727X  | 0.9254150390625  |
| NODE1043X | GENE524X  | NODE862X  | 0.92529296875    |
| NODE1044X | GENE1351X | GENE1350X | 0.92510986328125 |
| NODE1045X | GENE1651X | NODE772X  | 0.9249267578125  |
| NODE1046X | NODE917X  | NODE818X  | 0.9249267578125  |
| NODE1047X | NODE483X  | NODE247X  | 0.92486572265625 |
| NODE1048X | NODE871X  | NODE612X  | 0.92486572265625 |
| NODE1049X | NODE798X  | NODE585X  | 0.92486572265625 |
| NODE1050X | GENE578X  | GENE577X  | 0.92462158203125 |
| NODE1051X | NODE669X  | GENE368X  | 0.9244384765625  |
| NODE1052X | NODE454X  | NODE843X  | 0.92437744140625 |
| NODE1053X | GENE470X  | GENE469X  | 0.92431640625    |
| NODE1054X | NODE792X  | NODE662X  | 0.92431640625    |
| NODE1055X | NODE752X  | NODE505X  | 0.92425537109375 |
| NODE1056X | GENE661X  | NODE863X  | 0.9241943359375  |
| NODE1057X | NODE810X  | NODE903X  | 0.92413330078125 |
| NODE1058X | GENE1896X | GENE1895X | 0.924072265625   |
| NODE1059X | GENE1360X | GENE1359X | 0.92401123046875 |
| NODE1060X | GENE1041X | NODE708X  | 0.92401123046875 |
| NODE1061X | GENE2656X | NODE446X  | 0.9239501953125  |
| NODE1062X | GENE2400X | GENE2399X | 0.9237060546875  |
| NODE1063X | GENE1198X | GENE1197X | 0.923583984375   |
| NODE1064X | GENE1587X | GENE1584X | 0.923583984375   |
| NODE1065X | NODE809X  | GENE2022X | 0.923583984375   |
| NODE1066X | NODE673X  | GENE2227X | 0.92352294921875 |
| NODE1067X | GENE715X  | GENE714X  | 0.9234619140625  |
| NODE1068X | GENE379X  | NODE457X  | 0.92340087890625 |
| NODE1069X | GENE672X  | GENE671X  | 0.92340087890625 |
| NODE1070X | NODE1033X | NODE573X  | 0.92340087890625 |
| NODE1071X | NODE732X  | GENE1919X | 0.92327880859375 |
| NODE1072X | NODE519X  | NODE718X  | 0.9232177734375  |
| NODE1073X | GENE2343X | GENE2260X | 0.92315673828125 |
| NODE1074X | NODE824X  | NODE496X  | 0.9229736328125  |
| NODE1075X | NODE657X  | NODE517X  | 0.9229736328125  |
| NODE1076X | GENE398X  | GENE397X  | 0.9227294921875  |
| NODE1077X | GENE710X  | GENE709X  | 0.92266845703125 |
| NODE1078X | NODE737X  | GENE2046X | 0.922607421875   |
| NODE1079X | GENE2145X | NODE611X  | 0.922607421875   |
| NODE1080X | GENE8X    | GENE7X    | 0.92254638671875 |
| NODE1081X | NODE212X  | GENE393X  | 0.92254638671875 |
| NODE1082X | GENE2268X | GENE2003X | 0.92254638671875 |
| NODE1083X | NODE769X  | NODE743X  | 0.92242431640625 |

|           |           |           |                  |
|-----------|-----------|-----------|------------------|
| NODE1084X | NODE882X  | NODE516X  | 0.92236328125    |
| NODE1085X | GENE690X  | GENE462X  | 0.922119140625   |
| NODE1086X | NODE957X  | NODE925X  | 0.92205810546875 |
| NODE1087X | GENE1291X | GENE1290X | 0.9219970703125  |
| NODE1088X | GENE1629X | GENE1628X | 0.92193603515625 |
| NODE1089X | GENE2042X | GENE2041X | 0.92181396484375 |
| NODE1090X | NODE643X  | GENE1622X | 0.92169189453125 |
| NODE1091X | GENE1134X | GENE1133X | 0.92156982421875 |
| NODE1092X | NODE599X  | NODE606X  | 0.92138671875    |
| NODE1093X | NODE417X  | NODE92X   | 0.92132568359375 |
| NODE1094X | GENE692X  | GENE691X  | 0.9212646484375  |
| NODE1095X | GENE2201X | GENE2200X | 0.9212646484375  |
| NODE1096X | NODE888X  | NODE326X  | 0.9212646484375  |
| NODE1097X | NODE697X  | GENE2063X | 0.921142578125   |
| NODE1098X | NODE547X  | NODE801X  | 0.921142578125   |
| NODE1099X | NODE854X  | NODE930X  | 0.9208984375     |
| NODE1100X | NODE782X  | GENE2164X | 0.92071533203125 |
| NODE1101X | NODE659X  | GENE2469X | 0.92059326171875 |
| NODE1102X | NODE432X  | NODE616X  | 0.9205322265625  |
| NODE1103X | GENE723X  | GENE722X  | 0.92047119140625 |
| NODE1104X | NODE980X  | NODE1043X | 0.92047119140625 |
| NODE1105X | GENE2204X | GENE2203X | 0.92034912109375 |
| NODE1106X | GENE2079X | GENE2078X | 0.92022705078125 |
| NODE1107X | GENE1892X | GENE1891X | 0.920166015625   |
| NODE1108X | NODE754X  | NODE605X  | 0.920166015625   |
| NODE1109X | GENE1589X | NODE509X  | 0.92010498046875 |
| NODE1110X | GENE1978X | GENE1977X | 0.92010498046875 |
| NODE1111X | GENE645X  | GENE643X  | 0.91998291015625 |
| NODE1112X | GENE1718X | GENE1717X | 0.91998291015625 |
| NODE1113X | GENE1992X | GENE1991X | 0.91986083984375 |
| NODE1114X | GENE1706X | GENE1705X | 0.9197998046875  |
| NODE1115X | GENE2251X | GENE2249X | 0.91973876953125 |
| NODE1116X | NODE909X  | GENE2060X | 0.919677734375   |
| NODE1117X | NODE646X  | NODE592X  | 0.919677734375   |
| NODE1118X | NODE736X  | NODE745X  | 0.919677734375   |
| NODE1119X | GENE1201X | GENE1200X | 0.91961669921875 |
| NODE1120X | GENE536X  | NODE553X  | 0.919189453125   |
| NODE1121X | GENE1642X | GENE1641X | 0.919189453125   |
| NODE1122X | NODE589X  | NODE869X  | 0.918701171875   |
| NODE1123X | GENE2531X | NODE580X  | 0.91864013671875 |
| NODE1124X | NODE760X  | NODE779X  | 0.91864013671875 |
| NODE1125X | GENE2230X | GENE2012X | 0.91851806640625 |
| NODE1126X | NODE625X  | NODE656X  | 0.91839599609375 |
| NODE1127X | GENE647X  | GENE646X  | 0.9180908203125  |
| NODE1128X | NODE484X  | NODE706X  | 0.9180908203125  |
| NODE1129X | GENE422X  | NODE791X  | 0.91796875       |
| NODE1130X | GENE622X  | GENE547X  | 0.91796875       |
| NODE1131X | GENE1933X | GENE1932X | 0.91790771484375 |
| NODE1132X | GENE696X  | GENE695X  | 0.9178466796875  |
| NODE1133X | GENE915X  | GENE914X  | 0.9178466796875  |
| NODE1134X | GENE636X  | GENE635X  | 0.91778564453125 |
| NODE1135X | GENE1084X | GENE1083X | 0.91748046875    |
| NODE1136X | GENE2090X | NODE1017X | 0.91741943359375 |
| NODE1137X | NODE974X  | NODE712X  | 0.91741943359375 |
| NODE1138X | GENE1999X | GENE1997X | 0.9173583984375  |
| NODE1139X | GENE2163X | NODE127X  | 0.917236328125   |
| NODE1140X | GENE1682X | NODE836X  | 0.91705322265625 |

|           |           |           |                  |
|-----------|-----------|-----------|------------------|
| NODE1141X | GENE1412X | GENE1411X | 0.9168701171875  |
| NODE1142X | GENE2226X | GENE2225X | 0.9168701171875  |
| NODE1143X | NODE723X  | GENE440X  | 0.91668701171875 |
| NODE1144X | GENE937X  | GENE936X  | 0.9166259765625  |
| NODE1145X | NODE666X  | NODE979X  | 0.91650390625    |
| NODE1146X | GENE1802X | GENE1801X | 0.91644287109375 |
| NODE1147X | GENE2653X | NODE579X  | 0.91644287109375 |
| NODE1148X | NODE870X  | NODE574X  | 0.916259765625   |
| NODE1149X | GENE1029X | NODE371X  | 0.91619873046875 |
| NODE1150X | GENE2267X | NODE1019X | 0.91619873046875 |
| NODE1151X | GENE2417X | NODE856X  | 0.91607666015625 |
| NODE1152X | GENE1160X | NODE777X  | 0.916015625      |
| NODE1153X | GENE1866X | GENE1865X | 0.91583251953125 |
| NODE1154X | NODE913X  | GENE608X  | 0.915771484375   |
| NODE1155X | GENE2566X | GENE2565X | 0.915771484375   |
| NODE1156X | GENE1635X | GENE1634X | 0.91571044921875 |
| NODE1157X | GENE1549X | GENE1548X | 0.9156494140625  |
| NODE1158X | GENE2620X | GENE2619X | 0.91558837890625 |
| NODE1159X | GENE1639X | GENE1521X | 0.91546630859375 |
| NODE1160X | GENE1970X | GENE1920X | 0.91546630859375 |
| NODE1161X | GENE1669X | NODE825X  | 0.9154052734375  |
| NODE1162X | GENE1066X | NODE709X  | 0.915283203125   |
| NODE1163X | GENE2649X | GENE2648X | 0.91522216796875 |
| NODE1164X | GENE922X  | NODE875X  | 0.9151611328125  |
| NODE1165X | GENE2206X | GENE2205X | 0.9151611328125  |
| NODE1166X | GENE10X   | GENE9X    | 0.91510009765625 |
| NODE1167X | GENE29X   | NODE891X  | 0.9150390625     |
| NODE1168X | GENE2262X | GENE2261X | 0.9150390625     |
| NODE1169X | GENE799X  | NODE472X  | 0.9150390625     |
| NODE1170X | GENE1575X | NODE554X  | 0.91485595703125 |
| NODE1171X | NODE677X  | NODE647X  | 0.91485595703125 |
| NODE1172X | GENE1542X | GENE1541X | 0.9146728515625  |
| NODE1173X | NODE846X  | NODE587X  | 0.91461181640625 |
| NODE1174X | NODE774X  | NODE734X  | 0.91461181640625 |
| NODE1175X | GENE1010X | GENE1009X | 0.9144287109375  |
| NODE1176X | NODE929X  | NODE771X  | 0.91436767578125 |
| NODE1177X | NODE802X  | GENE1652X | 0.914306640625   |
| NODE1178X | GENE871X  | GENE870X  | 0.91424560546875 |
| NODE1179X | NODE674X  | NODE635X  | 0.91412353515625 |
| NODE1180X | GENE2392X | NODE716X  | 0.91387939453125 |
| NODE1181X | NODE938X  | NODE1176X | 0.913818359375   |
| NODE1182X | NODE467X  | NODE830X  | 0.9136962890625  |
| NODE1183X | NODE692X  | NODE531X  | 0.91357421875    |
| NODE1184X | NODE912X  | NODE630X  | 0.91357421875    |
| NODE1185X | NODE835X  | GENE2466X | 0.91351318359375 |
| NODE1186X | GENE1817X | GENE1816X | 0.9134521484375  |
| NODE1187X | NODE1047X | GENE473X  | 0.9132080078125  |
| NODE1188X | NODE805X  | GENE2561X | 0.9130859375     |
| NODE1189X | NODE557X  | GENE314X  | 0.91302490234375 |
| NODE1190X | GENE486X  | GENE479X  | 0.91302490234375 |
| NODE1191X | NODE893X  | NODE1086X | 0.91302490234375 |
| NODE1192X | GENE1097X | GENE1096X | 0.9129638671875  |
| NODE1193X | NODE761X  | NODE688X  | 0.91290283203125 |
| NODE1194X | GENE686X  | GENE685X  | 0.912841796875   |
| NODE1195X | NODE117X  | GENE1699X | 0.912841796875   |
| NODE1196X | GENE1069X | GENE1068X | 0.9127197265625  |
| NODE1197X | GENE2371X | GENE1918X | 0.9127197265625  |

|           |           |           |                  |
|-----------|-----------|-----------|------------------|
| NODE1198X | GENE2604X | NODE827X  | 0.91259765625    |
| NODE1199X | GENE1142X | GENE1141X | 0.91253662109375 |
| NODE1200X | GENE2660X | NODE826X  | 0.9122314453125  |
| NODE1201X | GENE1516X | GENE1515X | 0.91217041015625 |
| NODE1202X | GENE1178X | GENE1177X | 0.91204833984375 |
| NODE1203X | GENE1982X | GENE1944X | 0.91204833984375 |
| NODE1204X | GENE1233X | NODE490X  | 0.91192626953125 |
| NODE1205X | NODE858X  | NODE1054X | 0.91180419921875 |
| NODE1206X | NODE1007X | GENE2098X | 0.9117431640625  |
| NODE1207X | NODE1028X | NODE944X  | 0.91162109375    |
| NODE1208X | GENE446X  | NODE562X  | 0.91156005859375 |
| NODE1209X | NODE841X  | NODE964X  | 0.9114990234375  |
| NODE1210X | GENE2084X | GENE2083X | 0.91143798828125 |
| NODE1211X | NODE966X  | NODE729X  | 0.911376953125   |
| NODE1212X | NODE715X  | NODE1055X | 0.91131591796875 |
| NODE1213X | GENE990X  | GENE989X  | 0.9112548828125  |
| NODE1214X | GENE626X  | NODE895X  | 0.9110107421875  |
| NODE1215X | GENE701X  | GENE689X  | 0.91094970703125 |
| NODE1216X | NODE735X  | GENE2074X | 0.91094970703125 |
| NODE1217X | GENE382X  | NODE642X  | 0.910888671875   |
| NODE1218X | NODE988X  | NODE916X  | 0.9107666015625  |
| NODE1219X | NODE840X  | GENE387X  | 0.9105224609375  |
| NODE1220X | GENE2094X | GENE2093X | 0.91046142578125 |
| NODE1221X | NODE713X  | NODE1037X | 0.91046142578125 |
| NODE1222X | NODE1083X | NODE952X  | 0.91046142578125 |
| NODE1223X | GENE1967X | GENE1966X | 0.910400390625   |
| NODE1224X | GENE670X  | GENE669X  | 0.91033935546875 |
| NODE1225X | GENE39X   | NODE932X  | 0.9102783203125  |
| NODE1226X | GENE980X  | NODE422X  | 0.9102783203125  |
| NODE1227X | GENE2282X | GENE2281X | 0.91015625       |
| NODE1228X | NODE848X  | GENE2324X | 0.9100341796875  |
| NODE1229X | NODE806X  | NODE689X  | 0.909912109375   |
| NODE1230X | NODE796X  | NODE699X  | 0.909912109375   |
| NODE1231X | NODE778X  | GENE923X  | 0.90985107421875 |
| NODE1232X | NODE710X  | GENE2213X | 0.90985107421875 |
| NODE1233X | GENE392X  | GENE391X  | 0.90972900390625 |
| NODE1234X | NODE747X  | GENE1299X | 0.90972900390625 |
| NODE1235X | NODE1042X | NODE1034X | 0.90972900390625 |
| NODE1236X | GENE545X  | NODE817X  | 0.90960693359375 |
| NODE1237X | NODE741X  | GENE631X  | 0.90948486328125 |
| NODE1238X | GENE2014X | GENE2013X | 0.90948486328125 |
| NODE1239X | GENE2401X | GENE1945X | 0.909423828125   |
| NODE1240X | GENE2192X | GENE2191X | 0.9093017578125  |
| NODE1241X | GENE2240X | NODE897X  | 0.9093017578125  |
| NODE1242X | NODE636X  | NODE740X  | 0.90924072265625 |
| NODE1243X | GENE2628X | GENE2627X | 0.90911865234375 |
| NODE1244X | NODE1038X | GENE1166X | 0.9090576171875  |
| NODE1245X | NODE879X  | GENE311X  | 0.90899658203125 |
| NODE1246X | GENE1268X | GENE1267X | 0.9088134765625  |
| NODE1247X | GENE386X  | NODE1004X | 0.90869140625    |
| NODE1248X | GENE1711X | NODE998X  | 0.90869140625    |
| NODE1249X | NODE603X  | NODE943X  | 0.9083251953125  |
| NODE1250X | GENE2242X | GENE1912X | 0.908203125      |
| NODE1251X | GENE988X  | GENE573X  | 0.9080810546875  |
| NODE1252X | GENE2543X | GENE1673X | 0.9080810546875  |
| NODE1253X | NODE756X  | GENE2245X | 0.9080810546875  |
| NODE1254X | NODE658X  | GENE481X  | 0.90802001953125 |

|           |           |           |                  |
|-----------|-----------|-----------|------------------|
| NODE1255X | GENE566X  | GENE565X  | 0.9078369140625  |
| NODE1256X | NODE803X  | NODE1022X | 0.90777587890625 |
| NODE1257X | GENE2407X | GENE2406X | 0.90765380859375 |
| NODE1258X | NODE721X  | GENE1899X | 0.9075927734375  |
| NODE1259X | GENE1054X | NODE949X  | 0.9073486328125  |
| NODE1260X | NODE919X  | NODE900X  | 0.90728759765625 |
| NODE1261X | GENE1272X | GENE1271X | 0.9072265625     |
| NODE1262X | NODE898X  | NODE790X  | 0.9072265625     |
| NODE1263X | GENE1340X | GENE1339X | 0.90716552734375 |
| NODE1264X | GENE1165X | NODE997X  | 0.9071044921875  |
| NODE1265X | NODE960X  | NODE540X  | 0.90704345703125 |
| NODE1266X | GENE2190X | GENE2189X | 0.906982421875   |
| NODE1267X | GENE1631X | GENE1630X | 0.90692138671875 |
| NODE1268X | GENE2072X | GENE2071X | 0.9068603515625  |
| NODE1269X | NODE1068X | GENE345X  | 0.9068603515625  |
| NODE1270X | NODE1098X | NODE954X  | 0.9068603515625  |
| NODE1271X | GENE1353X | GENE1352X | 0.90679931640625 |
| NODE1272X | GENE1685X | GENE1684X | 0.90667724609375 |
| NODE1273X | GENE1059X | GENE339X  | 0.906494140625   |
| NODE1274X | NODE639X  | GENE2612X | 0.906494140625   |
| NODE1275X | GENE2617X | GENE2616X | 0.906494140625   |
| NODE1276X | NODE701X  | NODE787X  | 0.90643310546875 |
| NODE1277X | GENE2579X | GENE2578X | 0.9063720703125  |
| NODE1278X | NODE515X  | NODE1123X | 0.9063720703125  |
| NODE1279X | GENE1845X | GENE1844X | 0.90631103515625 |
| NODE1280X | GENE579X  | NODE1050X | 0.90631103515625 |
| NODE1281X | NODE975X  | NODE746X  | 0.90625          |
| NODE1282X | NODE866X  | NODE1072X | 0.90625          |
| NODE1283X | NODE785X  | NODE828X  | 0.90606689453125 |
| NODE1284X | GENE1100X | GENE1099X | 0.906005859375   |
| NODE1285X | GENE1748X | NODE535X  | 0.90557861328125 |
| NODE1286X | GENE1132X | GENE1131X | 0.90545654296875 |
| NODE1287X | NODE881X  | NODE700X  | 0.9053955078125  |
| NODE1288X | NODE1084X | NODE633X  | 0.90533447265625 |
| NODE1289X | NODE1075X | NODE821X  | 0.90521240234375 |
| NODE1290X | GENE1620X | GENE1619X | 0.90496826171875 |
| NODE1291X | GENE913X  | GENE688X  | 0.9049072265625  |
| NODE1292X | GENE1743X | NODE676X  | 0.9046630859375  |
| NODE1293X | NODE1200X | NODE751X  | 0.9046630859375  |
| NODE1294X | GENE1117X | GENE1116X | 0.904541015625   |
| NODE1295X | GENE2236X | GENE2235X | 0.90447998046875 |
| NODE1296X | GENE2220X | GENE1911X | 0.904296875      |
| NODE1297X | GENE2666X | GENE2665X | 0.90411376953125 |
| NODE1298X | GENE1003X | NODE800X  | 0.904052734375   |
| NODE1299X | NODE738X  | GENE2067X | 0.904052734375   |
| NODE1300X | GENE2177X | GENE2176X | 0.904052734375   |
| NODE1301X | NODE872X  | NODE1099X | 0.90374755859375 |
| NODE1302X | GENE712X  | GENE711X  | 0.9036865234375  |
| NODE1303X | GENE1482X | GENE1481X | 0.90325927734375 |
| NODE1304X | GENE1513X | GENE1512X | 0.90325927734375 |
| NODE1305X | NODE993X  | NODE845X  | 0.90325927734375 |
| NODE1306X | NODE720X  | GENE1174X | 0.9029541015625  |
| NODE1307X | NODE719X  | NODE744X  | 0.90289306640625 |
| NODE1308X | GENE2314X | GENE2313X | 0.90277099609375 |
| NODE1309X | GENE2418X | NODE987X  | 0.90277099609375 |
| NODE1310X | GENE574X  | GENE423X  | 0.90264892578125 |
| NODE1311X | NODE815X  | GENE2641X | 0.902587890625   |

|           |           |           |                  |
|-----------|-----------|-----------|------------------|
| NODE1312X | NODE1143X | NODE683X  | 0.90252685546875 |
| NODE1313X | NODE750X  | GENE1884X | 0.90240478515625 |
| NODE1314X | GENE1958X | GENE1957X | 0.90240478515625 |
| NODE1315X | GENE629X  | NODE812X  | 0.90234375       |
| NODE1316X | NODE901X  | GENE2547X | 0.90234375       |
| NODE1317X | GENE1355X | GENE1354X | 0.90228271484375 |
| NODE1318X | NODE885X  | GENE2087X | 0.90228271484375 |
| NODE1319X | NODE878X  | NODE653X  | 0.90228271484375 |
| NODE1320X | GENE2018X | NODE968X  | 0.90228271484375 |
| NODE1321X | GENE1734X | NODE783X  | 0.90216064453125 |
| NODE1322X | GENE1677X | GENE1676X | 0.902099609375   |
| NODE1323X | GENE856X  | NODE832X  | 0.9019775390625  |
| NODE1324X | GENE1136X | GENE1135X | 0.9017333984375  |
| NODE1325X | NODE953X  | NODE946X  | 0.901611328125   |
| NODE1326X | GENE2234X | NODE963X  | 0.90155029296875 |
| NODE1327X | NODE876X  | GENE2436X | 0.9012451171875  |
| NODE1328X | GENE519X  | GENE518X  | 0.90118408203125 |
| NODE1329X | NODE351X  | GENE2034X | 0.90118408203125 |
| NODE1330X | NODE508X  | NODE1011X | 0.901123046875   |
| NODE1331X | NODE788X  | NODE1106X | 0.901123046875   |
| NODE1332X | NODE962X  | GENE568X  | 0.90106201171875 |
| NODE1333X | GENE1343X | NODE853X  | 0.90106201171875 |
| NODE1334X | NODE129X  | GENE1248X | 0.9010009765625  |
| NODE1335X | GENE290X  | NODE1049X | 0.90087890625    |
| NODE1336X | NODE850X  | NODE438X  | 0.90069580078125 |
| NODE1337X | GENE2340X | NODE887X  | 0.9005126953125  |
| NODE1338X | GENE1405X | GENE1404X | 0.90045166015625 |
| NODE1339X | NODE849X  | NODE942X  | 0.900390625      |
| NODE1340X | NODE1101X | GENE2244X | 0.90032958984375 |
| NODE1341X | NODE1181X | NODE889X  | 0.9002685546875  |
| NODE1342X | NODE661X  | GENE2396X | 0.90020751953125 |
| NODE1343X | NODE904X  | NODE1126X | 0.90020751953125 |
| NODE1344X | NODE1249X | NODE1124X | 0.90008544921875 |
| NODE1345X | NODE851X  | GENE463X  | 0.9000244140625  |
| NODE1346X | NODE1133X | NODE852X  | 0.9000244140625  |
| NODE1347X | NODE695X  | NODE970X  | 0.89990234375    |
| NODE1348X | NODE702X  | GENE2006X | 0.89984130859375 |
| NODE1349X | NODE1078X | GENE2045X | 0.89984130859375 |
| NODE1350X | NODE1002X | NODE956X  | 0.8997802734375  |
| NODE1351X | NODE1138X | GENE1995X | 0.89971923828125 |
| NODE1352X | GENE1524X | GENE1523X | 0.899658203125   |
| NODE1353X | GENE2430X | NODE711X  | 0.89947509765625 |
| NODE1354X | NODE955X  | GENE1914X | 0.8990478515625  |
| NODE1355X | GENE1694X | GENE1693X | 0.89886474609375 |
| NODE1356X | GENE1948X | NODE473X  | 0.8988037109375  |
| NODE1357X | GENE1026X | GENE1025X | 0.898681640625   |
| NODE1358X | GENE2291X | NODE950X  | 0.8985595703125  |
| NODE1359X | GENE1182X | NODE626X  | 0.8985595703125  |
| NODE1360X | GENE2187X | GENE2186X | 0.89837646484375 |
| NODE1361X | GENE1073X | GENE1072X | 0.8983154296875  |
| NODE1362X | GENE1071X | GENE1070X | 0.89825439453125 |
| NODE1363X | NODE947X  | NODE905X  | 0.89801025390625 |
| NODE1364X | NODE1016X | NODE983X  | 0.89788818359375 |
| NODE1365X | GENE2468X | NODE926X  | 0.89764404296875 |
| NODE1366X | NODE395X  | NODE770X  | 0.8975830078125  |
| NODE1367X | NODE833X  | NODE619X  | 0.8975830078125  |
| NODE1368X | NODE488X  | GENE1698X | 0.8974609375     |



|           |           |           |                  |
|-----------|-----------|-----------|------------------|
| NODE1369X | NODE807X  | NODE961X  | 0.8973388671875  |
| NODE1370X | NODE1031X | NODE1169X | 0.897216796875   |
| NODE1371X | NODE1171X | NODE1092X | 0.897216796875   |
| NODE1372X | GENE1943X | GENE1942X | 0.8970947265625  |
| NODE1373X | NODE864X  | GENE2598X | 0.8970947265625  |
| NODE1374X | NODE902X  | NODE996X  | 0.89703369140625 |
| NODE1375X | GENE2051X | GENE2000X | 0.89678955078125 |
| NODE1376X | NODE660X  | NODE1009X | 0.89678955078125 |
| NODE1377X | GENE683X  | GENE682X  | 0.896728515625   |
| NODE1378X | NODE672X  | NODE978X  | 0.8966064453125  |
| NODE1379X | GENE2413X | GENE2412X | 0.896484375      |
| NODE1380X | NODE1254X | GENE480X  | 0.896240234375   |
| NODE1381X | GENE674X  | GENE673X  | 0.89617919921875 |
| NODE1382X | NODE1334X | GENE1247X | 0.895751953125   |
| NODE1383X | NODE959X  | GENE262X  | 0.8955078125     |
| NODE1384X | GENE2366X | NODE1287X | 0.89532470703125 |
| NODE1385X | GENE693X  | NODE1094X | 0.895263671875   |
| NODE1386X | NODE927X  | GENE1729X | 0.89501953125    |
| NODE1387X | NODE973X  | NODE834X  | 0.89501953125    |
| NODE1388X | GENE2312X | GENE2305X | 0.89471435546875 |
| NODE1389X | NODE873X  | GENE1124X | 0.8946533203125  |
| NODE1390X | NODE1059X | GENE1358X | 0.8946533203125  |
| NODE1391X | GENE907X  | NODE941X  | 0.89453125       |
| NODE1392X | NODE1223X | GENE1965X | 0.8944091796875  |
| NODE1393X | GENE2218X | GENE2217X | 0.8944091796875  |
| NODE1394X | NODE1129X | NODE914X  | 0.8944091796875  |
| NODE1395X | GENE698X  | GENE697X  | 0.89434814453125 |
| NODE1396X | GENE1956X | NODE831X  | 0.89434814453125 |
| NODE1397X | GENE1274X | GENE2611X | 0.89337158203125 |
| NODE1398X | GENE2202X | NODE1095X | 0.89324951171875 |
| NODE1399X | GENE734X  | GENE733X  | 0.8931884765625  |
| NODE1400X | NODE1154X | NODE990X  | 0.8931884765625  |
| NODE1401X | NODE1180X | NODE829X  | 0.89312744140625 |
| NODE1402X | GENE649X  | GENE648X  | 0.89300537109375 |
| NODE1403X | NODE1128X | NODE1235X | 0.89276123046875 |
| NODE1404X | GENE1964X | GENE1953X | 0.8927001953125  |
| NODE1405X | NODE725X  | NODE1136X | 0.892578125      |
| NODE1406X | NODE811X  | NODE1255X | 0.892578125      |
| NODE1407X | NODE1288X | NODE1137X | 0.892578125      |
| NODE1408X | NODE1189X | NODE1245X | 0.89251708984375 |
| NODE1409X | GENE517X  | GENE516X  | 0.892333984375   |
| NODE1410X | GENE2553X | NODE570X  | 0.89227294921875 |
| NODE1411X | NODE1319X | NODE1006X | 0.89215087890625 |
| NODE1412X | GENE1119X | GENE1118X | 0.89208984375    |
| NODE1413X | NODE1197X | GENE1923X | 0.89202880859375 |
| NODE1414X | NODE908X  | NODE1242X | 0.89202880859375 |
| NODE1415X | NODE1076X | GENE396X  | 0.8919677734375  |
| NODE1416X | NODE1185X | NODE1048X | 0.89190673828125 |
| NODE1417X | NODE1130X | GENE548X  | 0.89178466796875 |
| NODE1418X | GENE946X  | GENE945X  | 0.89141845703125 |
| NODE1419X | NODE861X  | NODE1010X | 0.8912353515625  |
| NODE1420X | GENE1144X | GENE726X  | 0.89117431640625 |
| NODE1421X | NODE1148X | NODE1212X | 0.89093017578125 |
| NODE1422X | GENE1470X | GENE1469X | 0.890869140625   |
| NODE1423X | NODE763X  | GENE1588X | 0.89080810546875 |
| NODE1424X | NODE808X  | NODE1165X | 0.89080810546875 |
| NODE1425X | NODE910X  | GENE2583X | 0.890625         |

|           |           |           |                  |
|-----------|-----------|-----------|------------------|
| NODE1426X | GENE1122X | GENE1121X | 0.89044189453125 |
| NODE1427X | GENE1184X | GENE1183X | 0.890380859375   |
| NODE1428X | NODE1339X | NODE768X  | 0.89019775390625 |
| NODE1429X | NODE1120X | NODE1152X | 0.89013671875    |
| NODE1430X | GENE1016X | GENE1015X | 0.89007568359375 |
| NODE1431X | NODE1211X | NODE731X  | 0.8900146484375  |
| NODE1432X | NODE773X  | NODE1111X | 0.88995361328125 |
| NODE1433X | GENE2137X | NODE986X  | 0.8897705078125  |
| NODE1434X | GENE1373X | NODE341X  | 0.88934326171875 |
| NODE1435X | GENE1140X | GENE487X  | 0.8892822265625  |
| NODE1436X | GENE1564X | GENE1563X | 0.8892822265625  |
| NODE1437X | NODE886X  | NODE1289X | 0.8892822265625  |
| NODE1438X | GENE1179X | GENE383X  | 0.88909912109375 |
| NODE1439X | GENE2096X | GENE2095X | 0.88909912109375 |
| NODE1440X | NODE1174X | NODE1118X | 0.888916015625   |
| NODE1441X | GENE2029X | GENE2028X | 0.88885498046875 |
| NODE1442X | GENE1962X | GENE1961X | 0.88861083984375 |
| NODE1443X | GENE1703X | GENE1702X | 0.8885498046875  |
| NODE1444X | NODE935X  | NODE939X  | 0.88848876953125 |
| NODE1445X | GENE2540X | NODE1026X | 0.8883056640625  |
| NODE1446X | GENE1858X | GENE1857X | 0.88824462890625 |
| NODE1447X | NODE1384X | NODE937X  | 0.8880615234375  |
| NODE1448X | GENE1952X | GENE1939X | 0.887939453125   |
| NODE1449X | GENE908X  | GENE708X  | 0.88787841796875 |
| NODE1450X | NODE1276X | NODE920X  | 0.88775634765625 |
| NODE1451X | NODE1320X | GENE2015X | 0.88763427734375 |
| NODE1452X | NODE1074X | NODE894X  | 0.8873291015625  |
| NODE1453X | NODE1285X | GENE1744X | 0.88720703125    |
| NODE1454X | NODE781X  | NODE999X  | 0.88720703125    |
| NODE1455X | GENE1725X | GENE1720X | 0.88677978515625 |
| NODE1456X | NODE991X  | NODE1121X | 0.88665771484375 |
| NODE1457X | NODE1190X | GENE477X  | 0.8863525390625  |
| NODE1458X | NODE867X  | NODE1335X | 0.88623046875    |
| NODE1459X | GENE1473X | GENE1472X | 0.8861083984375  |
| NODE1460X | NODE1193X | NODE1260X | 0.8861083984375  |
| NODE1461X | GENE2086X | GENE2085X | 0.8858642578125  |
| NODE1462X | GENE1187X | GENE700X  | 0.885498046875   |
| NODE1463X | NODE1052X | GENE2334X | 0.88543701171875 |
| NODE1464X | NODE256X  | NODE1008X | 0.8853759765625  |
| NODE1465X | GENE1045X | GENE1044X | 0.884765625      |
| NODE1466X | GENE2605X | NODE1198X | 0.8846435546875  |
| NODE1467X | NODE1066X | NODE1021X | 0.8846435546875  |
| NODE1468X | GENE902X  | NODE794X  | 0.884521484375   |
| NODE1469X | GENE1854X | NODE652X  | 0.88421630859375 |
| NODE1470X | GENE2044X | GENE2043X | 0.884033203125   |
| NODE1471X | NODE1346X | NODE1363X | 0.884033203125   |
| NODE1472X | GENE1095X | NODE1053X | 0.88385009765625 |
| NODE1473X | NODE1167X | NODE880X  | 0.8836669921875  |
| NODE1474X | NODE1311X | NODE780X  | 0.88348388671875 |
| NODE1475X | GENE665X  | GENE664X  | 0.88323974609375 |
| NODE1476X | GENE1031X | GENE1030X | 0.88323974609375 |
| NODE1477X | GENE1540X | NODE918X  | 0.88323974609375 |
| NODE1478X | NODE1367X | GENE2311X | 0.88323974609375 |
| NODE1479X | GENE1013X | NODE581X  | 0.883056640625   |
| NODE1480X | NODE726X  | NODE1166X | 0.883056640625   |
| NODE1481X | GENE1818X | NODE1186X | 0.883056640625   |
| NODE1482X | NODE1056X | NODE1378X | 0.88287353515625 |

|           |           |           |                  |
|-----------|-----------|-----------|------------------|
| NODE1483X | NODE820X  | NODE1267X | 0.8826904296875  |
| NODE1484X | GENE2630X | GENE2629X | 0.88250732421875 |
| NODE1485X | GENE1621X | NODE1290X | 0.8824462890625  |
| NODE1486X | NODE992X  | NODE1228X | 0.88201904296875 |
| NODE1487X | NODE1208X | NODE1312X | 0.8819580078125  |
| NODE1488X | NODE1256X | NODE1369X | 0.88189697265625 |
| NODE1489X | NODE915X  | NODE1222X | 0.88177490234375 |
| NODE1490X | NODE921X  | NODE691X  | 0.8817138671875  |
| NODE1491X | NODE1241X | NODE1295X | 0.88153076171875 |
| NODE1492X | NODE1231X | NODE1323X | 0.8809814453125  |
| NODE1493X | NODE1297X | GENE2664X | 0.88092041015625 |
| NODE1494X | GENE1856X | GENE1855X | 0.88079833984375 |
| NODE1495X | GENE1202X | NODE1119X | 0.88067626953125 |
| NODE1496X | NODE1280X | NODE804X  | 0.88067626953125 |
| NODE1497X | GENE1986X | GENE1985X | 0.8804931640625  |
| NODE1498X | GENE1940X | NODE1041X | 0.880126953125   |
| NODE1499X | NODE1386X | NODE948X  | 0.880126953125   |
| NODE1500X | NODE1085X | GENE405X  | 0.88006591796875 |
| NODE1501X | NODE1079X | NODE971X  | 0.8800048828125  |
| NODE1502X | NODE1233X | GENE390X  | 0.87994384765625 |
| NODE1503X | GENE1928X | NODE1093X | 0.8797607421875  |
| NODE1504X | GENE885X  | NODE1117X | 0.8795166015625  |
| NODE1505X | NODE1082X | GENE2002X | 0.87945556640625 |
| NODE1506X | NODE1177X | NODE1159X | 0.87933349609375 |
| NODE1507X | NODE977X  | NODE1293X | 0.879150390625   |
| NODE1508X | GENE514X  | NODE989X  | 0.8790283203125  |
| NODE1509X | GENE2435X | GENE2434X | 0.87896728515625 |
| NODE1510X | NODE924X  | NODE1172X | 0.87884521484375 |
| NODE1511X | GENE1812X | GENE1811X | 0.87872314453125 |
| NODE1512X | GENE1904X | GENE1903X | 0.8785400390625  |
| NODE1513X | NODE1455X | GENE1719X | 0.87823486328125 |
| NODE1514X | NODE1113X | GENE1990X | 0.878173828125   |
| NODE1515X | GENE2404X | GENE2403X | 0.878173828125   |
| NODE1516X | NODE1243X | GENE2626X | 0.8780517578125  |
| NODE1517X | GENE1147X | GENE1146X | 0.87799072265625 |
| NODE1518X | GENE1259X | GENE1258X | 0.87799072265625 |
| NODE1519X | NODE1214X | NODE922X  | 0.87799072265625 |
| NODE1520X | NODE1355X | GENE1692X | 0.87799072265625 |
| NODE1521X | GENE1981X | GENE1976X | 0.87786865234375 |
| NODE1522X | NODE1202X | NODE1030X | 0.87786865234375 |
| NODE1523X | NODE1432X | NODE1127X | 0.87786865234375 |
| NODE1524X | NODE1416X | NODE1179X | 0.8775634765625  |
| NODE1525X | GENE987X  | NODE1080X | 0.87744140625    |
| NODE1526X | NODE749X  | NODE1336X | 0.87744140625    |
| NODE1527X | NODE816X  | NODE1040X | 0.87738037109375 |
| NODE1528X | GENE1381X | NODE813X  | 0.8773193359375  |
| NODE1529X | NODE1003X | NODE1450X | 0.87725830078125 |
| NODE1530X | NODE1063X | NODE1217X | 0.87701416015625 |
| NODE1531X | NODE940X  | NODE1187X | 0.87664794921875 |
| NODE1532X | GENE1902X | GENE1898X | 0.87640380859375 |
| NODE1533X | NODE1269X | NODE1051X | 0.87640380859375 |
| NODE1534X | NODE1301X | NODE1374X | 0.8763427734375  |
| NODE1535X | NODE1281X | NODE1102X | 0.87628173828125 |
| NODE1536X | GENE705X  | NODE859X  | 0.876220703125   |
| NODE1537X | NODE184X  | GENE1763X | 0.876220703125   |
| NODE1538X | GENE1851X | GENE1850X | 0.87615966796875 |
| NODE1539X | GENE2030X | GENE1913X | 0.87603759765625 |

|           |           |           |                  |
|-----------|-----------|-----------|------------------|
| NODE1540X | GENE511X  | NODE1383X | 0.87591552734375 |
| NODE1541X | NODE965X  | NODE1265X | 0.87591552734375 |
| NODE1542X | NODE1467X | NODE1100X | 0.8758544921875  |
| NODE1543X | GENE1560X | GENE1559X | 0.8753662109375  |
| NODE1544X | GENE1269X | NODE1246X | 0.8753662109375  |
| NODE1545X | NODE1061X | NODE1230X | 0.8751220703125  |
| NODE1546X | GENE450X  | NODE1023X | 0.87506103515625 |
| NODE1547X | GENE1222X | GENE1221X | 0.87506103515625 |
| NODE1548X | GENE2250X | GENE1640X | 0.87506103515625 |
| NODE1549X | NODE1538X | GENE1849X | 0.8746337890625  |
| NODE1550X | GENE1042X | NODE1060X | 0.87451171875    |
| NODE1551X | NODE722X  | NODE1262X | 0.87432861328125 |
| NODE1552X | GENE1306X | GENE1305X | 0.8741455078125  |
| NODE1553X | GENE725X  | GENE460X  | 0.87408447265625 |
| NODE1554X | GENE1170X | GENE1169X | 0.8740234375     |
| NODE1555X | GENE1408X | GENE1407X | 0.87396240234375 |
| NODE1556X | GENE1963X | NODE1442X | 0.8739013671875  |
| NODE1557X | NODE1013X | GENE1137X | 0.87384033203125 |
| NODE1558X | GENE1196X | NODE1029X | 0.87384033203125 |
| NODE1559X | GENE2317X | GENE2210X | 0.873291015625   |
| NODE1560X | NODE1388X | NODE934X  | 0.87322998046875 |
| NODE1561X | NODE951X  | GENE916X  | 0.87310791015625 |
| NODE1562X | NODE1139X | NODE1216X | 0.8729248046875  |
| NODE1563X | NODE1207X | NODE1421X | 0.87274169921875 |
| NODE1564X | GENE2159X | GENE2158X | 0.8726806640625  |
| NODE1565X | NODE857X  | GENE2408X | 0.8726806640625  |
| NODE1566X | NODE1103X | GENE404X  | 0.87249755859375 |
| NODE1567X | NODE1182X | NODE1252X | 0.87249755859375 |
| NODE1568X | GENE1022X | GENE1021X | 0.8724365234375  |
| NODE1569X | GENE2425X | GENE2424X | 0.87237548828125 |
| NODE1570X | NODE928X  | NODE1341X | 0.87237548828125 |
| NODE1571X | GENE1785X | GENE1784X | 0.87225341796875 |
| NODE1572X | GENE1191X | GENE1190X | 0.87213134765625 |
| NODE1573X | NODE1551X | NODE972X  | 0.87188720703125 |
| NODE1574X | NODE1032X | NODE1110X | 0.87158203125    |
| NODE1575X | NODE1149X | NODE1357X | 0.8712158203125  |
| NODE1576X | GENE1090X | GENE1089X | 0.8707275390625  |
| NODE1577X | GENE1606X | NODE892X  | 0.8707275390625  |
| NODE1578X | GENE1704X | NODE1443X | 0.870361328125   |
| NODE1579X | NODE1058X | GENE1894X | 0.8699951171875  |
| NODE1580X | GENE2050X | GENE2049X | 0.8699951171875  |
| NODE1581X | NODE1306X | NODE1522X | 0.86981201171875 |
| NODE1582X | NODE1454X | NODE1158X | 0.8697509765625  |
| NODE1583X | GENE403X  | GENE402X  | 0.86968994140625 |
| NODE1584X | GENE1805X | GENE1804X | 0.86956787109375 |
| NODE1585X | NODE698X  | NODE1313X | 0.86944580078125 |
| NODE1586X | GENE1871X | GENE1870X | 0.869384765625   |
| NODE1587X | NODE981X  | NODE1178X | 0.86932373046875 |
| NODE1588X | NODE1258X | NODE1532X | 0.86920166015625 |
| NODE1589X | NODE1350X | NODE1545X | 0.86883544921875 |
| NODE1590X | GENE1906X | GENE1905X | 0.8680419921875  |
| NODE1591X | NODE1236X | NODE1218X | 0.86798095703125 |
| NODE1592X | NODE967X  | NODE1226X | 0.867919921875   |
| NODE1593X | GENE1438X | GENE1437X | 0.86785888671875 |
| NODE1594X | GENE1951X | GENE1950X | 0.86737060546875 |
| NODE1595X | GENE676X  | GENE675X  | 0.86712646484375 |
| NODE1596X | GENE1019X | NODE1298X | 0.86700439453125 |

|           |           |           |                  |
|-----------|-----------|-----------|------------------|
| NODE1597X | NODE1272X | GENE1683X | 0.86700439453125 |
| NODE1598X | GENE1120X | NODE1412X | 0.86700439453125 |
| NODE1599X | GENE1347X | GENE1346X | 0.8668212890625  |
| NODE1600X | GENE1889X | GENE1888X | 0.86676025390625 |
| NODE1601X | GENE679X  | GENE678X  | 0.866455078125   |
| NODE1602X | NODE1229X | NODE896X  | 0.86614990234375 |
| NODE1603X | GENE2193X | NODE1240X | 0.86614990234375 |
| NODE1604X | GENE1778X | GENE1567X | 0.8660888671875  |
| NODE1605X | NODE1012X | NODE936X  | 0.86602783203125 |
| NODE1606X | NODE1318X | NODE1268X | 0.865966796875   |
| NODE1607X | NODE1387X | NODE1160X | 0.86590576171875 |
| NODE1608X | GENE474X  | NODE844X  | 0.86572265625    |
| NODE1609X | NODE1155X | GENE2564X | 0.8656005859375  |
| NODE1610X | GENE642X  | NODE984X  | 0.86541748046875 |
| NODE1611X | GENE1049X | GENE1048X | 0.86541748046875 |
| NODE1612X | GENE1688X | GENE1686X | 0.8653564453125  |
| NODE1613X | NODE1125X | NODE1238X | 0.865234375      |
| NODE1614X | NODE1554X | NODE1244X | 0.865234375      |
| NODE1615X | GENE1528X | GENE1527X | 0.86492919921875 |
| NODE1616X | NODE1351X | GENE1996X | 0.86480712890625 |
| NODE1617X | NODE1184X | NODE1504X | 0.86480712890625 |
| NODE1618X | NODE1089X | NODE374X  | 0.86468505859375 |
| NODE1619X | GENE1037X | GENE1036X | 0.8646240234375  |
| NODE1620X | NODE560X  | GENE2631X | 0.86456298828125 |
| NODE1621X | NODE1400X | NODE1057X | 0.86456298828125 |
| NODE1622X | NODE1503X | NODE1354X | 0.86456298828125 |
| NODE1623X | GENE2027X | NODE1005X | 0.86444091796875 |
| NODE1624X | GENE934X  | NODE1468X | 0.86395263671875 |
| NODE1625X | NODE1064X | GENE1569X | 0.86334228515625 |
| NODE1626X | NODE1191X | NODE1205X | 0.86334228515625 |
| NODE1627X | NODE1316X | NODE847X  | 0.86328125       |
| NODE1628X | GENE1235X | GENE1234X | 0.86309814453125 |
| NODE1629X | NODE1499X | GENE1728X | 0.8626708984375  |
| NODE1630X | GENE1525X | NODE1352X | 0.86260986328125 |
| NODE1631X | NODE865X  | NODE1173X | 0.86260986328125 |
| NODE1632X | NODE1595X | NODE1035X | 0.862548828125   |
| NODE1633X | GENE2097X | NODE1439X | 0.862060546875   |
| NODE1634X | NODE1347X | NODE1096X | 0.8619384765625  |
| NODE1635X | NODE1438X | GENE699X  | 0.86181640625    |
| NODE1636X | NODE1417X | GENE546X  | 0.86175537109375 |
| NODE1637X | GENE1055X | NODE1259X | 0.861572265625   |
| NODE1638X | GENE485X  | NODE1457X | 0.8609619140625  |
| NODE1639X | NODE1565X | GENE2219X | 0.86053466796875 |
| NODE1640X | GENE435X  | GENE426X  | 0.8603515625     |
| NODE1641X | NODE1283X | GENE495X  | 0.86029052734375 |
| NODE1642X | GENE1627X | GENE1626X | 0.860107421875   |
| NODE1643X | GENE567X  | GENE491X  | 0.85986328125    |
| NODE1644X | GENE2283X | NODE1227X | 0.85986328125    |
| NODE1645X | NODE1224X | NODE906X  | 0.85986328125    |
| NODE1646X | GENE2185X | GENE2184X | 0.8597412109375  |
| NODE1647X | NODE1330X | NODE1370X | 0.8594970703125  |
| NODE1648X | NODE1501X | NODE1433X | 0.8594970703125  |
| NODE1649X | GENE1794X | GENE1788X | 0.85931396484375 |
| NODE1650X | GENE2557X | GENE2556X | 0.85919189453125 |
| NODE1651X | GENE2248X | NODE1253X | 0.859130859375   |
| NODE1652X | GENE638X  | GENE637X  | 0.85906982421875 |
| NODE1653X | NODE1344X | NODE1440X | 0.85882568359375 |

|           |           |           |                  |
|-----------|-----------|-----------|------------------|
| NODE1654X | GENE1308X | GENE1307X | 0.858642578125   |
| NODE1655X | NODE1237X | GENE630X  | 0.85858154296875 |
| NODE1656X | NODE995X  | NODE1425X | 0.8585205078125  |
| NODE1657X | NODE985X  | NODE1491X | 0.8585205078125  |
| NODE1658X | GENE1123X | NODE1426X | 0.8582763671875  |
| NODE1659X | NODE1039X | NODE1250X | 0.8580322265625  |
| NODE1660X | GENE520X  | NODE1219X | 0.85791015625    |
| NODE1661X | NODE1234X | GENE1298X | 0.8577880859375  |
| NODE1662X | GENE1491X | GENE1490X | 0.85760498046875 |
| NODE1663X | NODE1403X | NODE1282X | 0.85748291015625 |
| NODE1664X | NODE1132X | GENE694X  | 0.85736083984375 |
| NODE1665X | NODE1362X | NODE1196X | 0.85736083984375 |
| NODE1666X | NODE1331X | NODE1183X | 0.85687255859375 |
| NODE1667X | NODE1613X | GENE2011X | 0.8568115234375  |
| NODE1668X | GENE1910X | GENE1909X | 0.85675048828125 |
| NODE1669X | GENE2423X | GENE2422X | 0.856689453125   |
| NODE1670X | NODE1423X | NODE762X  | 0.8563232421875  |
| NODE1671X | NODE1373X | NODE868X  | 0.85614013671875 |
| NODE1672X | NODE1463X | NODE1337X | 0.8558349609375  |
| NODE1673X | GENE2284X | GENE1797X | 0.855712890625   |
| NODE1674X | GENE1988X | GENE1987X | 0.855712890625   |
| NODE1675X | GENE1283X | GENE1282X | 0.8556518546875  |
| NODE1676X | NODE1142X | NODE1542X | 0.8553466796875  |
| NODE1677X | NODE1104X | NODE1414X | 0.85516357421875 |
| NODE1678X | GENE1159X | NODE1345X | 0.85498046875    |
| NODE1679X | GENE1018X | NODE1490X | 0.854736328125   |
| NODE1680X | GENE948X  | GENE947X  | 0.85455322265625 |
| NODE1681X | GENE938X  | NODE1144X | 0.85455322265625 |
| NODE1682X | NODE1292X | NODE1221X | 0.85443115234375 |
| NODE1683X | GENE2194X | NODE1603X | 0.854248046875   |
| NODE1684X | GENE1237X | GENE1236X | 0.85418701171875 |
| NODE1685X | GENE1000X | GENE436X  | 0.85394287109375 |
| NODE1686X | GENE1151X | GENE1150X | 0.85394287109375 |
| NODE1687X | GENE1189X | GENE1188X | 0.8538818359375  |
| NODE1688X | NODE1209X | NODE1444X | 0.85382080078125 |
| NODE1689X | NODE551X  | GENE1531X | 0.85369873046875 |
| NODE1690X | GENE2057X | GENE2056X | 0.8536376953125  |
| NODE1691X | NODE1411X | NODE1170X | 0.8536376953125  |
| NODE1692X | NODE1147X | GENE2650X | 0.853515625      |
| NODE1693X | NODE923X  | NODE1452X | 0.85345458984375 |
| NODE1694X | NODE1116X | NODE379X  | 0.853271484375   |
| NODE1695X | NODE1239X | NODE753X  | 0.853271484375   |
| NODE1696X | GENE2280X | GENE1696X | 0.85321044921875 |
| NODE1697X | NODE1358X | GENE1695X | 0.85308837890625 |
| NODE1698X | NODE1601X | GENE677X  | 0.85284423828125 |
| NODE1699X | NODE1163X | GENE2647X | 0.85284423828125 |
| NODE1700X | NODE1302X | NODE1077X | 0.85284423828125 |
| NODE1701X | GENE716X  | NODE1067X | 0.85272216796875 |
| NODE1702X | NODE1213X | GENE724X  | 0.85272216796875 |
| NODE1703X | GENE2316X | GENE2315X | 0.8526611328125  |
| NODE1704X | GENE719X  | GENE718X  | 0.85211181640625 |
| NODE1705X | NODE1108X | NODE1478X | 0.85205078125    |
| NODE1706X | GENE2253X | GENE2252X | 0.851806640625   |
| NODE1707X | GENE400X  | GENE399X  | 0.85174560546875 |
| NODE1708X | NODE1397X | NODE556X  | 0.85174560546875 |
| NODE1709X | GENE2208X | GENE2207X | 0.8511962890625  |
| NODE1710X | NODE1677X | NODE1407X | 0.85107421875    |

|           |           |           |                  |
|-----------|-----------|-----------|------------------|
| NODE1711X | GENE1046X | NODE1465X | 0.850830078125   |
| NODE1712X | NODE1489X | NODE1225X | 0.85028076171875 |
| NODE1713X | NODE1199X | NODE1557X | 0.85015869140625 |
| NODE1714X | GENE1908X | GENE1815X | 0.85003662109375 |
| NODE1715X | GENE2264X | GENE2263X | 0.84967041015625 |
| NODE1716X | NODE1263X | GENE1338X | 0.849609375      |
| NODE1717X | NODE1073X | NODE1296X | 0.84930419921875 |
| NODE1718X | GENE1304X | GENE1303X | 0.84906005859375 |
| NODE1719X | NODE1122X | NODE1375X | 0.848876953125   |
| NODE1720X | NODE1365X | NODE1325X | 0.848876953125   |
| NODE1721X | GENE1823X | GENE1822X | 0.84881591796875 |
| NODE1722X | GENE1514X | NODE1304X | 0.84869384765625 |
| NODE1723X | NODE1164X | NODE1307X | 0.8486328125     |
| NODE1724X | GENE1129X | NODE994X  | 0.84857177734375 |
| NODE1725X | NODE1437X | NODE1145X | 0.84844970703125 |
| NODE1726X | GENE1067X | NODE1162X | 0.848388671875   |
| NODE1727X | NODE1515X | GENE2402X | 0.84832763671875 |
| NODE1728X | NODE1657X | NODE1326X | 0.84832763671875 |
| NODE1729X | NODE1558X | GENE1193X | 0.847900390625   |
| NODE1730X | NODE1364X | NODE1247X | 0.84765625       |
| NODE1731X | NODE1670X | NODE1109X | 0.84735107421875 |
| NODE1732X | NODE1188X | GENE2558X | 0.8472900390625  |
| NODE1733X | GENE1278X | GENE1277X | 0.84716796875    |
| NODE1734X | NODE1251X | NODE1310X | 0.84698486328125 |
| NODE1735X | GENE1098X | NODE1192X | 0.84686279296875 |
| NODE1736X | NODE1134X | NODE1534X | 0.8468017578125  |
| NODE1737X | GENE2175X | GENE2174X | 0.84661865234375 |
| NODE1738X | NODE1376X | NODE1589X | 0.8465576171875  |
| NODE1739X | GENE1210X | GENE1209X | 0.84619140625    |
| NODE1740X | GENE1829X | GENE1828X | 0.84613037109375 |
| NODE1741X | NODE1156X | NODE1483X | 0.84564208984375 |
| NODE1742X | NODE1340X | NODE1151X | 0.845458984375   |
| NODE1743X | NODE1415X | NODE1081X | 0.84521484375    |
| NODE1744X | NODE1338X | GENE1403X | 0.84429931640625 |
| NODE1745X | NODE1519X | NODE1406X | 0.84429931640625 |
| NODE1746X | NODE1390X | NODE1025X | 0.843994140625   |
| NODE1747X | NODE1623X | GENE2024X | 0.84375          |
| NODE1748X | NODE1328X | NODE1409X | 0.84320068359375 |
| NODE1749X | NODE1305X | NODE1088X | 0.8431396484375  |
| NODE1750X | GENE1848X | NODE1279X | 0.84295654296875 |
| NODE1751X | NODE1314X | NODE1396X | 0.8427734375     |
| NODE1752X | GENE1841X | GENE1840X | 0.84271240234375 |
| NODE1753X | NODE1001X | NODE1394X | 0.84271240234375 |
| NODE1754X | NODE1371X | NODE1278X | 0.84259033203125 |
| NODE1755X | NODE969X  | NODE1329X | 0.84246826171875 |
| NODE1756X | NODE1445X | GENE2533X | 0.8424072265625  |
| NODE1757X | NODE1435X | NODE1380X | 0.84222412109375 |
| NODE1758X | NODE1150X | NODE1065X | 0.84185791015625 |
| NODE1759X | NODE1091X | NODE1286X | 0.84173583984375 |
| NODE1760X | GENE1034X | GENE1033X | 0.84149169921875 |
| NODE1761X | GENE1843X | GENE1842X | 0.84124755859375 |
| NODE1762X | NODE1045X | GENE1647X | 0.84100341796875 |
| NODE1763X | NODE1458X | NODE1653X | 0.84088134765625 |
| NODE1764X | NODE1168X | GENE2259X | 0.8408203125     |
| NODE1765X | NODE1691X | NODE1000X | 0.84075927734375 |
| NODE1766X | NODE1324X | GENE713X  | 0.84039306640625 |
| NODE1767X | GENE1289X | GENE1288X | 0.84027099609375 |

|           |           |           |                  |
|-----------|-----------|-----------|------------------|
| NODE1768X | GENE2467X | NODE1321X | 0.840087890625   |
| NODE1769X | GENE1810X | GENE1809X | 0.83953857421875 |
| NODE1770X | GENE2292X | GENE1799X | 0.83917236328125 |
| NODE1771X | NODE1567X | NODE1140X | 0.83905029296875 |
| NODE1772X | GENE1056X | NODE1637X | 0.8388671875     |
| NODE1773X | GENE702X  | NODE1215X | 0.8387451171875  |
| NODE1774X | NODE1535X | NODE1720X | 0.83856201171875 |
| NODE1775X | NODE1576X | GENE1088X | 0.8385009765625  |
| NODE1776X | NODE1261X | GENE919X  | 0.83831787109375 |
| NODE1777X | GENE2582X | NODE1027X | 0.838134765625   |
| NODE1778X | NODE1206X | NODE1431X | 0.83807373046875 |
| NODE1779X | GENE687X  | NODE1194X | 0.83795166015625 |
| NODE1780X | NODE1686X | GENE1149X | 0.83795166015625 |
| NODE1781X | NODE1561X | NODE1399X | 0.837890625      |
| NODE1782X | NODE1446X | NODE1494X | 0.837890625      |
| NODE1783X | NODE1486X | NODE1070X | 0.8377685546875  |
| NODE1784X | NODE757X  | GENE1294X | 0.83758544921875 |
| NODE1785X | NODE1460X | NODE1570X | 0.83758544921875 |
| NODE1786X | NODE1327X | NODE1353X | 0.83740234375    |
| NODE1787X | GENE1707X | NODE1114X | 0.8370361328125  |
| NODE1788X | NODE1018X | NODE1587X | 0.83642578125    |
| NODE1789X | GENE1670X | NODE1161X | 0.8360595703125  |
| NODE1790X | NODE1107X | GENE1890X | 0.8359375        |
| NODE1791X | GENE1007X | GENE1006X | 0.83587646484375 |
| NODE1792X | GENE1348X | NODE1599X | 0.83551025390625 |
| NODE1793X | NODE1627X | GENE2541X | 0.83526611328125 |
| NODE1794X | NODE945X  | GENE1315X | 0.83514404296875 |
| NODE1795X | GENE1082X | NODE907X  | 0.8350830078125  |
| NODE1796X | NODE1413X | NODE1071X | 0.83502197265625 |
| NODE1797X | NODE1621X | NODE1663X | 0.8349609375     |
| NODE1798X | GENE2663X | NODE1488X | 0.83453369140625 |
| NODE1799X | NODE1299X | NODE1097X | 0.83447265625    |
| NODE1800X | NODE1518X | GENE1257X | 0.83416748046875 |
| NODE1801X | GENE1274X | GENE1273X | 0.8341064453125  |
| NODE1802X | GENE1885X | GENE1883X | 0.833740234375   |
| NODE1803X | NODE1573X | NODE1343X | 0.83355712890625 |
| NODE1804X | GENE1229X | GENE1228X | 0.83331298828125 |
| NODE1805X | NODE1464X | GENE1712X | 0.8331298828125  |
| NODE1806X | GENE2567X | NODE1732X | 0.83306884765625 |
| NODE1807X | GENE1934X | NODE1131X | 0.83282470703125 |
| NODE1808X | GENE1020X | GENE527X  | 0.832763671875   |
| NODE1809X | GENE1212X | GENE1211X | 0.832763671875   |
| NODE1810X | GENE1882X | GENE1881X | 0.83270263671875 |
| NODE1811X | GENE1130X | NODE1724X | 0.83245849609375 |
| NODE1812X | NODE1115X | NODE1090X | 0.8323974609375  |
| NODE1813X | NODE1631X | GENE447X  | 0.83233642578125 |
| NODE1814X | NODE1500X | GENE427X  | 0.832275390625   |
| NODE1815X | NODE1625X | NODE1020X | 0.8316650390625  |
| NODE1816X | NODE1408X | NODE1634X | 0.83148193359375 |
| NODE1817X | NODE1592X | NODE1529X | 0.83148193359375 |
| NODE1818X | GENE2287X | GENE2286X | 0.8309326171875  |
| NODE1819X | GENE2209X | GENE1994X | 0.830322265625   |
| NODE1820X | NODE1449X | NODE933X  | 0.83013916015625 |
| NODE1821X | NODE1712X | NODE1473X | 0.83001708984375 |
| NODE1822X | GENE496X  | NODE958X  | 0.82977294921875 |
| NODE1823X | GENE1474X | NODE1459X | 0.82977294921875 |
| NODE1824X | NODE823X  | GENE1636X | 0.82958984375    |



|           |           |           |                  |
|-----------|-----------|-----------|------------------|
| NODE1825X | NODE1062X | NODE1342X | 0.82952880859375 |
| NODE1826X | NODE1487X | NODE1602X | 0.82952880859375 |
| NODE1827X | GENE1476X | GENE1475X | 0.8289794921875  |
| NODE1828X | NODE1366X | NODE1513X | 0.828857421875   |
| NODE1829X | NODE27X   | NODE1157X | 0.82867431640625 |
| NODE1830X | NODE1428X | NODE1424X | 0.82806396484375 |
| NODE1831X | NODE1419X | NODE1647X | 0.82781982421875 |
| NODE1832X | GENE1074X | NODE1361X | 0.82763671875    |
| NODE1833X | NODE1556X | NODE1404X | 0.82757568359375 |
| NODE1834X | NODE1232X | NODE1203X | 0.8271484375     |
| NODE1835X | NODE1264X | NODE1591X | 0.82696533203125 |
| NODE1836X | NODE1719X | NODE1348X | 0.8265380859375  |
| NODE1837X | GENE1922X | NODE1622X | 0.82635498046875 |
| NODE1838X | NODE1257X | GENE2405X | 0.8262939453125  |
| NODE1839X | GENE1511X | NODE1014X | 0.82537841796875 |
| NODE1840X | NODE1291X | NODE1723X | 0.82537841796875 |
| NODE1841X | NODE1475X | NODE1496X | 0.82537841796875 |
| NODE1842X | GENE1058X | GENE1057X | 0.8250732421875  |
| NODE1843X | GENE1218X | GENE1217X | 0.824951171875   |
| NODE1844X | NODE1410X | NODE1524X | 0.8248291015625  |
| NODE1845X | NODE1474X | NODE1527X | 0.8248291015625  |
| NODE1846X | GENE1463X | GENE1462X | 0.82470703125    |
| NODE1847X | NODE1381X | NODE1069X | 0.82470703125    |
| NODE1848X | NODE1270X | NODE884X  | 0.82452392578125 |
| NODE1849X | GENE1105X | GENE1060X | 0.82415771484375 |
| NODE1850X | NODE1427X | NODE1581X | 0.82403564453125 |
| NODE1851X | NODE1614X | NODE1482X | 0.82391357421875 |
| NODE1852X | NODE1648X | NODE1046X | 0.82379150390625 |
| NODE1853X | GENE1327X | GENE1326X | 0.82354736328125 |
| NODE1854X | GENE1392X | NODE1607X | 0.8232421875     |
| NODE1855X | GENE2618X | NODE1275X | 0.8231201171875  |
| NODE1856X | NODE1626X | NODE1480X | 0.82305908203125 |
| NODE1857X | GENE1051X | GENE1050X | 0.822998046875   |
| NODE1858X | NODE1349X | NODE1470X | 0.82293701171875 |
| NODE1859X | NODE1356X | GENE1941X | 0.82244873046875 |
| NODE1860X | GENE2170X | GENE2169X | 0.8218994140625  |
| NODE1861X | NODE874X  | GENE1362X | 0.82171630859375 |
| NODE1862X | GENE1984X | GENE1983X | 0.82171630859375 |
| NODE1863X | GENE1145X | NODE1420X | 0.82147216796875 |
| NODE1864X | GENE2555X | GENE2554X | 0.82135009765625 |
| NODE1865X | GENE1367X | GENE1366X | 0.8209228515625  |
| NODE1866X | GENE1501X | GENE1500X | 0.820556640625   |
| NODE1867X | GENE1776X | GENE1775X | 0.8204345703125  |
| NODE1868X | NODE1610X | NODE1643X | 0.82000732421875 |
| NODE1869X | NODE1598X | NODE1294X | 0.81964111328125 |
| NODE1870X | GENE1156X | GENE1155X | 0.819091796875   |
| NODE1871X | NODE1658X | NODE1540X | 0.81866455078125 |
| NODE1872X | GENE1023X | GENE515X  | 0.81854248046875 |
| NODE1873X | GENE940X  | NODE1660X | 0.81854248046875 |
| NODE1874X | GENE1697X | GENE1566X | 0.81854248046875 |
| NODE1875X | NODE1537X | GENE1762X | 0.81817626953125 |
| NODE1876X | NODE1671X | NODE1398X | 0.81805419921875 |
| NODE1877X | NODE1508X | NODE1429X | 0.81787109375    |
| NODE1878X | NODE1688X | NODE1472X | 0.81781005859375 |
| NODE1879X | NODE1759X | GENE484X  | 0.81781005859375 |
| NODE1880X | NODE1665X | NODE1726X | 0.817626953125   |
| NODE1881X | NODE1710X | NODE1563X | 0.8173828125     |

|           |           |           |                  |
|-----------|-----------|-----------|------------------|
| NODE1882X | NODE1678X | NODE1533X | 0.81732177734375 |
| NODE1883X | GENE999X  | GENE998X  | 0.81707763671875 |
| NODE1884X | GENE1385X | GENE1384X | 0.81695556640625 |
| NODE1885X | NODE1628X | NODE1204X | 0.81689453125    |
| NODE1886X | NODE1541X | NODE1447X | 0.81646728515625 |
| NODE1887X | NODE1787X | NODE1578X | 0.81597900390625 |
| NODE1888X | NODE1317X | NODE1271X | 0.81561279296875 |
| NODE1889X | NODE1514X | GENE1989X | 0.81500244140625 |
| NODE1890X | GENE2196X | GENE2195X | 0.81500244140625 |
| NODE1891X | NODE1564X | NODE1616X | 0.81488037109375 |
| NODE1892X | GENE2183X | GENE2182X | 0.81451416015625 |
| NODE1893X | GENE1245X | GENE1244X | 0.8140869140625  |
| NODE1894X | NODE1466X | NODE1837X | 0.81341552734375 |
| NODE1895X | GENE1820X | GENE1819X | 0.8133544921875  |
| NODE1896X | NODE1850X | GENE1078X | 0.81329345703125 |
| NODE1897X | NODE1785X | NODE1816X | 0.81317138671875 |
| NODE1898X | GENE1861X | GENE1860X | 0.81292724609375 |
| NODE1899X | NODE1418X | GENE944X  | 0.812744140625   |
| NODE1900X | GENE2395X | GENE2394X | 0.812744140625   |
| NODE1901X | GENE1255X | NODE368X  | 0.81268310546875 |
| NODE1902X | GENE1873X | GENE1872X | 0.81243896484375 |
| NODE1903X | NODE1405X | NODE1461X | 0.8123779296875  |
| NODE1904X | GENE1043X | NODE1550X | 0.81231689453125 |
| NODE1905X | NODE1505X | NODE1695X | 0.81231689453125 |
| NODE1906X | GENE1310X | GENE1309X | 0.8111572265625  |
| NODE1907X | NODE1393X | GENE2216X | 0.81085205078125 |
| NODE1908X | GENE1032X | NODE1476X | 0.8106689453125  |
| NODE1909X | GENE401X  | NODE1502X | 0.810546875      |
| NODE1910X | NODE1778X | NODE1574X | 0.81048583984375 |
| NODE1911X | GENE1936X | GENE1935X | 0.8104248046875  |
| NODE1912X | GENE976X  | GENE973X  | 0.81036376953125 |
| NODE1913X | NODE1569X | NODE1669X | 0.810302734375   |
| NODE1914X | GENE684X  | NODE1377X | 0.81024169921875 |
| NODE1915X | GENE904X  | GENE903X  | 0.80975341796875 |
| NODE1916X | GENE975X  | GENE974X  | 0.80963134765625 |
| NODE1917X | NODE1655X | NODE1315X | 0.8095703125     |
| NODE1918X | NODE1659X | NODE1105X | 0.80926513671875 |
| NODE1919X | NODE1624X | NODE1617X | 0.80908203125    |
| NODE1920X | GENE1414X | GENE1413X | 0.80902099609375 |
| NODE1921X | NODE1523X | NODE1402X | 0.80889892578125 |
| NODE1922X | GENE1344X | NODE1333X | 0.80853271484375 |
| NODE1923X | GENE2420X | GENE2181X | 0.8084716796875  |
| NODE1924X | NODE1594X | NODE1448X | 0.80828857421875 |
| NODE1925X | NODE1742X | NODE1379X | 0.80810546875    |
| NODE1926X | NODE1754X | GENE2279X | 0.8079833984375  |
| NODE1927X | GENE1417X | GENE1416X | 0.80780029296875 |
| NODE1928X | GENE935X  | GENE933X  | 0.8076171875     |
| NODE1929X | NODE1451X | NODE1372X | 0.8074951171875  |
| NODE1930X | NODE1555X | GENE1406X | 0.80743408203125 |
| NODE1931X | GENE1063X | GENE1062X | 0.80670166015625 |
| NODE1932X | GENE717X  | NODE1701X | 0.80657958984375 |
| NODE1933X | NODE1689X | GENE1297X | 0.806396484375   |
| NODE1934X | GENE2188X | GENE2031X | 0.80621337890625 |
| NODE1935X | NODE1666X | NODE1498X | 0.80615234375    |
| NODE1936X | GENE2293X | NODE1585X | 0.80560302734375 |
| NODE1937X | NODE1733X | GENE1276X | 0.8055419921875  |
| NODE1938X | NODE1609X | GENE2563X | 0.80523681640625 |

|           |           |           |                  |
|-----------|-----------|-----------|------------------|
| NODE1939X | NODE1395X | NODE1664X | 0.80523681640625 |
| NODE1940X | GENE506X  | GENE505X  | 0.80462646484375 |
| NODE1941X | GENE1787X | GENE1786X | 0.80462646484375 |
| NODE1942X | GENE2429X | NODE1673X | 0.80438232421875 |
| NODE1943X | GENE2608X | GENE2607X | 0.8040771484375  |
| NODE1944X | GENE932X  | GENE931X  | 0.8038330078125  |
| NODE1945X | NODE1714X | NODE1481X | 0.8038330078125  |
| NODE1946X | NODE1360X | NODE1646X | 0.80364990234375 |
| NODE1947X | GENE1429X | GENE1428X | 0.80352783203125 |
| NODE1948X | NODE1789X | NODE1456X | 0.8033447265625  |
| NODE1949X | NODE1559X | NODE1886X | 0.8031005859375  |
| NODE1950X | GENE1864X | GENE1863X | 0.802978515625   |
| NODE1951X | NODE1845X | NODE1656X | 0.802978515625   |
| NODE1952X | GENE1796X | GENE1795X | 0.80242919921875 |
| NODE1953X | NODE1855X | NODE1708X | 0.80224609375    |
| NODE1954X | NODE1605X | NODE1725X | 0.80157470703125 |
| NODE1955X | NODE1359X | NODE1640X | 0.801513671875   |
| NODE1956X | NODE1736X | NODE1763X | 0.80047607421875 |
| NODE1957X | NODE1273X | NODE1813X | 0.80010986328125 |
| NODE1958X | NODE1633X | NODE1220X | 0.79998779296875 |
| NODE1959X | NODE1846X | GENE1461X | 0.79974365234375 |
| NODE1960X | GENE1376X | GENE1375X | 0.7991943359375  |
| NODE1961X | GENE1281X | GENE1280X | 0.79913330078125 |
| NODE1962X | NODE1699X | GENE2646X | 0.799072265625   |
| NODE1963X | GENE1153X | NODE1530X | 0.79833984375    |
| NODE1964X | NODE1135X | NODE1842X | 0.7982177734375  |
| NODE1965X | GENE1148X | NODE1517X | 0.7978515625     |
| NODE1966X | NODE1584X | GENE1803X | 0.797607421875   |
| NODE1967X | GENE1949X | NODE1924X | 0.79730224609375 |
| NODE1968X | NODE1652X | NODE1821X | 0.797119140625   |
| NODE1969X | GENE1219X | GENE1199X | 0.796875         |
| NODE1970X | NODE1858X | GENE2001X | 0.796875         |
| NODE1971X | NODE1015X | NODE1751X | 0.796875         |
| NODE1972X | NODE1619X | NODE1679X | 0.79681396484375 |
| NODE1973X | GENE1203X | NODE1495X | 0.7967529296875  |
| NODE1974X | GENE1440X | GENE1439X | 0.79632568359375 |
| NODE1975X | NODE1195X | NODE1368X | 0.7962646484375  |
| NODE1976X | NODE1635X | NODE1835X | 0.7962646484375  |
| NODE1977X | NODE1579X | GENE1893X | 0.7957763671875  |
| NODE1978X | GENE939X  | NODE1583X | 0.79547119140625 |
| NODE1979X | NODE1914X | GENE681X  | 0.79522705078125 |
| NODE1980X | NODE1596X | GENE1004X | 0.7950439453125  |
| NODE1981X | NODE1841X | NODE1332X | 0.79486083984375 |
| NODE1982X | NODE1547X | GENE727X  | 0.794677734375   |
| NODE1983X | NODE1749X | NODE1741X | 0.79437255859375 |
| NODE1984X | NODE1571X | GENE1783X | 0.7943115234375  |
| NODE1985X | NODE1492X | NODE1840X | 0.794189453125   |
| NODE1986X | NODE1651X | NODE1812X | 0.7940673828125  |
| NODE1987X | GENE1877X | GENE1876X | 0.79376220703125 |
| NODE1988X | GENE1240X | GENE1239X | 0.793212890625   |
| NODE1989X | NODE1697X | NODE1696X | 0.7926025390625  |
| NODE1990X | NODE1820X | NODE1536X | 0.79229736328125 |
| NODE1991X | NODE1856X | NODE1471X | 0.79150390625    |
| NODE1992X | NODE1507X | NODE1793X | 0.791259765625   |
| NODE1993X | NODE1036X | GENE1929X | 0.7908935546875  |
| NODE1994X | NODE1745X | NODE1868X | 0.789794921875   |
| NODE1995X | NODE1672X | NODE1954X | 0.789794921875   |

|           |           |           |                  |
|-----------|-----------|-----------|------------------|
| NODE1996X | GENE2562X | NODE1903X | 0.78955078125    |
| NODE1997X | NODE1618X | NODE1755X | 0.7889404296875  |
| NODE1998X | NODE1604X | GENE1568X | 0.78851318359375 |
| NODE1999X | NODE1703X | NODE1308X | 0.7880859375     |
| NODE2000X | GENE1458X | GENE1457X | 0.78790283203125 |
| NODE2001X | NODE1650X | GENE1835X | 0.787841796875   |
| NODE2002X | NODE1506X | NODE1024X | 0.7877197265625  |
| NODE2003X | GENE1782X | GENE1781X | 0.78765869140625 |
| NODE2004X | GENE1102X | GENE1101X | 0.787353515625   |
| NODE2005X | GENE1394X | GENE1393X | 0.7869873046875  |
| NODE2006X | NODE1645X | NODE1566X | 0.7869873046875  |
| NODE2007X | GENE2180X | GENE1832X | 0.7860107421875  |
| NODE2008X | GENE1485X | GENE1484X | 0.78582763671875 |
| NODE2009X | NODE1608X | NODE1831X | 0.78564453125    |
| NODE2010X | NODE1590X | NODE1512X | 0.785400390625   |
| NODE2011X | GENE1320X | GENE1319X | 0.784912109375   |
| NODE2012X | NODE1146X | GENE1800X | 0.7841796875     |
| NODE2013X | GENE1814X | GENE1813X | 0.7841796875     |
| NODE2014X | NODE1803X | NODE1731X | 0.78369140625    |
| NODE2015X | NODE1612X | GENE1687X | 0.78350830078125 |
| NODE2016X | NODE1309X | NODE1728X | 0.7833251953125  |
| NODE2017X | NODE1572X | NODE1687X | 0.7833251953125  |
| NODE2018X | NODE1649X | GENE1789X | 0.78314208984375 |
| NODE2019X | GENE2427X | GENE2426X | 0.7830810546875  |
| NODE2020X | NODE877X  | NODE1553X | 0.782958984375   |
| NODE2021X | GENE1047X | NODE1711X | 0.78271484375    |
| NODE2022X | NODE1560X | NODE1548X | 0.78271484375    |
| NODE2023X | NODE1762X | NODE1765X | 0.7825927734375  |
| NODE2024X | NODE1638X | NODE1753X | 0.781982421875   |
| NODE2025X | NODE1562X | NODE1606X | 0.7818603515625  |
| NODE2026X | GENE1448X | GENE1447X | 0.781494140625   |
| NODE2027X | NODE1453X | NODE1805X | 0.78125          |
| NODE2028X | NODE1781X | GENE680X  | 0.7806396484375  |
| NODE2029X | NODE1716X | NODE1526X | 0.78033447265625 |
| NODE2030X | GENE1287X | GENE1286X | 0.7799072265625  |
| NODE2031X | NODE1823X | GENE1471X | 0.77978515625    |
| NODE2032X | NODE113X  | GENE1826X | 0.7796630859375  |
| NODE2033X | GENE1398X | GENE1397X | 0.779541015625   |
| NODE2034X | NODE1521X | GENE1975X | 0.7794189453125  |
| NODE2035X | NODE1479X | NODE1175X | 0.77923583984375 |
| NODE2036X | NODE1965X | NODE1863X | 0.778564453125   |
| NODE2037X | NODE1912X | GENE972X  | 0.77838134765625 |
| NODE2038X | NODE1991X | NODE1817X | 0.77825927734375 |
| NODE2039X | GENE1625X | NODE1485X | 0.7781982421875  |
| NODE2040X | GENE1094X | GENE504X  | 0.77801513671875 |
| NODE2041X | GENE1215X | GENE1205X | 0.777587890625   |
| NODE2042X | GENE1086X | GENE1085X | 0.77716064453125 |
| NODE2043X | NODE1847X | NODE1632X | 0.77691650390625 |
| NODE2044X | GENE1361X | NODE1746X | 0.77685546875    |
| NODE2045X | NODE1629X | NODE1112X | 0.77685546875    |
| NODE2046X | NODE1857X | NODE1611X | 0.77679443359375 |
| NODE2047X | NODE1580X | NODE1747X | 0.7767333984375  |
| NODE2048X | GENE1266X | GENE993X  | 0.77630615234375 |
| NODE2049X | NODE1758X | NODE1210X | 0.776123046875   |
| NODE2050X | NODE1734X | NODE1956X | 0.775146484375   |
| NODE2051X | NODE1756X | GENE2532X | 0.77447509765625 |
| NODE2052X | GENE1204X | NODE1973X | 0.77447509765625 |

|           |           |           |                  |
|-----------|-----------|-----------|------------------|
| NODE2053X | NODE1044X | GENE1349X | 0.7742919921875  |
| NODE2054X | NODE1838X | NODE1639X | 0.7738037109375  |
| NODE2055X | GENE1993X | NODE1588X | 0.773681640625   |
| NODE2056X | GENE1536X | GENE1535X | 0.77362060546875 |
| NODE2057X | NODE1844X | NODE976X  | 0.77288818359375 |
| NODE2058X | GENE2178X | NODE1300X | 0.77252197265625 |
| NODE2059X | NODE1915X | NODE1641X | 0.7724609375     |
| NODE2060X | NODE1676X | NODE1667X | 0.7724609375     |
| NODE2061X | NODE1582X | NODE1852X | 0.772216796875   |
| NODE2062X | NODE1918X | NODE1717X | 0.77166748046875 |
| NODE2063X | NODE1707X | NODE1743X | 0.7716064453125  |
| NODE2064X | NODE1683X | NODE1266X | 0.77130126953125 |
| NODE2065X | NODE1943X | GENE2606X | 0.77105712890625 |
| NODE2066X | GENE1093X | GENE1092X | 0.7705078125     |
| NODE2067X | NODE1849X | NODE1908X | 0.7703857421875  |
| NODE2068X | NODE1586X | GENE1869X | 0.77001953125    |
| NODE2069X | NODE1929X | NODE1859X | 0.76953125       |
| NODE2070X | NODE1782X | NODE1469X | 0.7691650390625  |
| NODE2071X | NODE1484X | NODE1516X | 0.76904296875    |
| NODE2072X | NODE1738X | NODE1774X | 0.76898193359375 |
| NODE2073X | NODE1811X | NODE1389X | 0.768798828125   |
| NODE2074X | NODE1493X | NODE1798X | 0.7686767578125  |
| NODE2075X | NODE1284X | NODE1685X | 0.7685546875     |
| NODE2076X | NODE1981X | NODE1822X | 0.76849365234375 |
| NODE2077X | NODE1382X | GENE1246X | 0.76800537109375 |
| NODE2078X | NODE668X  | GENE1477X | 0.76800537109375 |
| NODE2079X | NODE1977X | NODE1790X | 0.76763916015625 |
| NODE2080X | NODE1797X | NODE1897X | 0.76727294921875 |
| NODE2081X | GENE1452X | GENE1451X | 0.7672119140625  |
| NODE2082X | NODE1441X | GENE2023X | 0.7669677734375  |
| NODE2083X | NODE1644X | GENE2278X | 0.7669677734375  |
| NODE2084X | GENE1390X | GENE1389X | 0.76678466796875 |
| NODE2085X | GENE1252X | GENE1251X | 0.7664794921875  |
| NODE2086X | NODE1636X | NODE1877X | 0.76629638671875 |
| NODE2087X | GENE1432X | GENE1431X | 0.76611328125    |
| NODE2088X | NODE1828X | NODE2045X | 0.76580810546875 |
| NODE2089X | NODE1705X | NODE1983X | 0.76373291015625 |
| NODE2090X | GENE2173X | GENE2172X | 0.763427734375   |
| NODE2091X | NODE1520X | GENE1691X | 0.76324462890625 |
| NODE2092X | NODE1511X | GENE1779X | 0.76318359375    |
| NODE2093X | NODE1702X | NODE1814X | 0.76263427734375 |
| NODE2094X | NODE1510X | NODE1477X | 0.76171875       |
| NODE2095X | NODE1904X | NODE1826X | 0.76171875       |
| NODE2096X | NODE1940X | GENE492X  | 0.7613525390625  |
| NODE2097X | NODE1630X | GENE1518X | 0.7607421875     |
| NODE2098X | GENE1285X | GENE1284X | 0.76055908203125 |
| NODE2099X | NODE1401X | NODE1986X | 0.760498046875   |
| NODE2100X | NODE1509X | NODE1989X | 0.76043701171875 |
| NODE2101X | NODE1921X | NODE1693X | 0.76031494140625 |
| NODE2102X | GENE1008X | NODE1791X | 0.76025390625    |
| NODE2103X | NODE1876X | NODE931X  | 0.760009765625   |
| NODE2104X | GENE1017X | NODE1430X | 0.7598876953125  |
| NODE2105X | NODE1575X | NODE1881X | 0.7598876953125  |
| NODE2106X | NODE1704X | NODE1978X | 0.75970458984375 |
| NODE2107X | NODE1391X | NODE2080X | 0.7596435546875  |
| NODE2108X | NODE1896X | NODE1713X | 0.759521484375   |
| NODE2109X | GENE1767X | GENE1766X | 0.75946044921875 |

|           |           |           |                  |
|-----------|-----------|-----------|------------------|
| NODE2110X | NODE1779X | NODE1979X | 0.75927734375    |
| NODE2111X | NODE1933X | NODE1784X | 0.7581787109375  |
| NODE2112X | GENE1377X | NODE1960X | 0.758056640625   |
| NODE2113X | NODE1810X | GENE1880X | 0.75775146484375 |
| NODE2114X | GENE1035X | NODE1760X | 0.75726318359375 |
| NODE2115X | GENE949X  | NODE1680X | 0.757080078125   |
| NODE2116X | NODE1769X | GENE1808X | 0.75701904296875 |
| NODE2117X | GENE1216X | GENE1214X | 0.75677490234375 |
| NODE2118X | NODE1694X | NODE1690X | 0.75628662109375 |
| NODE2119X | NODE1942X | NODE1770X | 0.755859375      |
| NODE2120X | NODE1739X | NODE1462X | 0.75567626953125 |
| NODE2121X | NODE1552X | NODE1718X | 0.75372314453125 |
| NODE2122X | NODE1792X | GENE1345X | 0.75323486328125 |
| NODE2123X | NODE1889X | NODE1539X | 0.753173828125   |
| NODE2124X | NODE1777X | NODE1277X | 0.75311279296875 |
| NODE2125X | NODE1764X | NODE1709X | 0.752685546875   |
| NODE2126X | NODE1531X | NODE1985X | 0.7523193359375  |
| NODE2127X | GENE2197X | NODE1890X | 0.75213623046875 |
| NODE2128X | NODE1899X | GENE943X  | 0.75177001953125 |
| NODE2129X | NODE2025X | NODE1799X | 0.75164794921875 |
| NODE2130X | GENE1793X | GENE1792X | 0.75103759765625 |
| NODE2131X | NODE1727X | NODE1825X | 0.75067138671875 |
| NODE2132X | GENE1419X | GENE1418X | 0.75054931640625 |
| NODE2133X | NODE1783X | NODE1577X | 0.7503662109375  |
| NODE2134X | GENE1392X | GENE1391X | 0.750244140625   |
| NODE2135X | NODE1824X | GENE1565X | 0.7501220703125  |
| NODE2136X | NODE1700X | NODE1976X | 0.74993896484375 |
| NODE2137X | GENE1158X | GENE1157X | 0.749755859375   |
| NODE2138X | NODE1834X | NODE1910X | 0.7493896484375  |
| NODE2139X | GENE996X  | GENE995X  | 0.7490234375     |
| NODE2140X | GENE1839X | GENE1838X | 0.74884033203125 |
| NODE2141X | NODE1829X | GENE1547X | 0.74761962890625 |
| NODE2142X | NODE1916X | NODE1730X | 0.74755859375    |
| NODE2143X | GENE1265X | NODE2024X | 0.7471923828125  |
| NODE2144X | NODE1926X | NODE1768X | 0.7471923828125  |
| NODE2145X | GENE1038X | GENE1014X | 0.74713134765625 |
| NODE2146X | GENE1104X | GENE950X  | 0.746826171875   |
| NODE2147X | NODE1773X | NODE1939X | 0.74664306640625 |
| NODE2148X | NODE1248X | NODE1887X | 0.74658203125    |
| NODE2149X | NODE2002X | GENE1522X | 0.74627685546875 |
| NODE2150X | NODE1682X | NODE1597X | 0.74615478515625 |
| NODE2151X | NODE1854X | NODE1833X | 0.74609375       |
| NODE2152X | NODE1201X | NODE1722X | 0.74542236328125 |
| NODE2153X | GENE1208X | NODE513X  | 0.745361328125   |
| NODE2154X | NODE1843X | NODE1969X | 0.74468994140625 |
| NODE2155X | NODE1729X | GENE1192X | 0.74456787109375 |
| NODE2156X | NODE1830X | NODE2103X | 0.74249267578125 |
| NODE2157X | GENE1262X | GENE1061X | 0.74176025390625 |
| NODE2158X | NODE1888X | NODE2053X | 0.7415771484375  |
| NODE2159X | GENE634X  | NODE1917X | 0.74151611328125 |
| NODE2160X | NODE1871X | NODE1748X | 0.740478515625   |
| NODE2161X | GENE1388X | GENE1387X | 0.73974609375    |
| NODE2162X | NODE2116X | NODE2092X | 0.73974609375    |
| NODE2163X | GENE1421X | GENE1420X | 0.7396240234375  |
| NODE2164X | NODE2049X | NODE1796X | 0.73956298828125 |
| NODE2165X | NODE1836X | NODE1891X | 0.73931884765625 |
| NODE2166X | NODE1851X | NODE1909X | 0.73895263671875 |

|           |           |           |                  |
|-----------|-----------|-----------|------------------|
| NODE2167X | NODE1735X | NODE2021X | 0.73876953125    |
| NODE2168X | NODE2051X | NODE2057X | 0.73870849609375 |
| NODE2169X | NODE2063X | NODE1968X | 0.7386474609375  |
| NODE2170X | NODE1786X | NODE1771X | 0.73614501953125 |
| NODE2171X | NODE2043X | GENE639X  | 0.73529052734375 |
| NODE2172X | GENE1937X | NODE1911X | 0.73492431640625 |
| NODE2173X | NODE1322X | NODE1815X | 0.734619140625   |
| NODE2174X | GENE1322X | GENE1321X | 0.73431396484375 |
| NODE2175X | GENE1238X | NODE1684X | 0.73406982421875 |
| NODE2176X | GENE1807X | GENE1806X | 0.73394775390625 |
| NODE2177X | GENE1383X | GENE1382X | 0.7337646484375  |
| NODE2178X | GENE2033X | GENE2032X | 0.7335205078125  |
| NODE2179X | NODE1957X | NODE2009X | 0.73345947265625 |
| NODE2180X | NODE1788X | NODE1878X | 0.733154296875   |
| NODE2181X | NODE1860X | GENE2168X | 0.73284912109375 |
| NODE2182X | NODE2147X | NODE1385X | 0.732421875      |
| NODE2183X | NODE2031X | NODE1422X | 0.73028564453125 |
| NODE2184X | NODE1970X | NODE1153X | 0.7301025390625  |
| NODE2185X | GENE1378X | NODE2112X | 0.72955322265625 |
| NODE2186X | NODE2040X | GENE503X  | 0.729248046875   |
| NODE2187X | NODE2074X | NODE1951X | 0.7291259765625  |
| NODE2188X | NODE2071X | NODE1953X | 0.72869873046875 |
| NODE2189X | NODE2006X | NODE1882X | 0.72808837890625 |
| NODE2190X | NODE2055X | GENE1897X | 0.727783203125   |
| NODE2191X | NODE1900X | GENE2393X | 0.72772216796875 |
| NODE2192X | GENE1430X | NODE1947X | 0.7275390625     |
| NODE2193X | GENE1075X | NODE1955X | 0.7274169921875  |
| NODE2194X | NODE1775X | GENE1087X | 0.72686767578125 |
| NODE2195X | NODE1879X | NODE1757X | 0.72662353515625 |
| NODE2196X | GENE1368X | NODE1865X | 0.72650146484375 |
| NODE2197X | GENE1790X | GENE1768X | 0.72650146484375 |
| NODE2198X | NODE1642X | NODE1436X | 0.72650146484375 |
| NODE2199X | GENE1761X | GENE1760X | 0.7261962890625  |
| NODE2200X | NODE1675X | NODE1961X | 0.72601318359375 |
| NODE2201X | GENE1295X | GENE1241X | 0.72564697265625 |
| NODE2202X | NODE1497X | NODE1862X | 0.72454833984375 |
| NODE2203X | NODE1922X | NODE2029X | 0.72381591796875 |
| NODE2204X | NODE1937X | GENE1275X | 0.72210693359375 |
| NODE2205X | NODE2014X | NODE2023X | 0.72210693359375 |
| NODE2206X | NODE1715X | NODE2060X | 0.72149658203125 |
| NODE2207X | GENE1369X | GENE1152X | 0.7213134765625  |
| NODE2208X | NODE1620X | NODE1827X | 0.7208251953125  |
| NODE2209X | GENE1225X | GENE1091X | 0.72015380859375 |
| NODE2210X | NODE1906X | NODE1654X | 0.71954345703125 |
| NODE2211X | GENE1243X | GENE1242X | 0.71929931640625 |
| NODE2212X | NODE2093X | NODE1525X | 0.7166748046875  |
| NODE2213X | NODE1832X | NODE1880X | 0.71624755859375 |
| NODE2214X | GENE2179X | NODE2058X | 0.71490478515625 |
| NODE2215X | NODE1936X | NODE1802X | 0.71490478515625 |
| NODE2216X | GENE1555X | GENE1554X | 0.714599609375   |
| NODE2217X | NODE1945X | NODE2013X | 0.71356201171875 |
| NODE2218X | GENE1427X | GENE1426X | 0.71319580078125 |
| NODE2219X | NODE2079X | NODE1600X | 0.71240234375    |
| NODE2220X | NODE1692X | NODE1894X | 0.71160888671875 |
| NODE2221X | NODE2172X | NODE1807X | 0.7113037109375  |
| NODE2222X | NODE1919X | NODE2059X | 0.71014404296875 |
| NODE2223X | NODE1543X | GENE1558X | 0.7098388671875  |

|           |           |           |                  |
|-----------|-----------|-----------|------------------|
| NODE2224X | NODE1958X | NODE2138X | 0.7098388671875  |
| NODE2225X | NODE2170X | NODE1948X | 0.70904541015625 |
| NODE2226X | GENE2421X | NODE1668X | 0.7086181640625  |
| NODE2227X | NODE2125X | NODE1819X | 0.708251953125   |
| NODE2228X | NODE2042X | NODE2075X | 0.708251953125   |
| NODE2229X | GENE1292X | GENE977X  | 0.7081298828125  |
| NODE2230X | NODE1998X | NODE1874X | 0.7076416015625  |
| NODE2231X | NODE1795X | NODE1772X | 0.706787109375   |
| NODE2232X | GENE1504X | GENE1503X | 0.70635986328125 |
| NODE2233X | NODE2142X | NODE1546X | 0.70440673828125 |
| NODE2234X | GENE1887X | GENE1886X | 0.703125         |
| NODE2235X | NODE1721X | GENE1821X | 0.7030029296875  |
| NODE2236X | NODE1974X | NODE1593X | 0.7027587890625  |
| NODE2237X | GENE1459X | NODE2000X | 0.702392578125   |
| NODE2238X | NODE1959X | GENE1460X | 0.702392578125   |
| NODE2239X | NODE2151X | NODE1971X | 0.70220947265625 |
| NODE2240X | NODE2101X | NODE2107X | 0.70196533203125 |
| NODE2241X | NODE2032X | GENE1827X | 0.70111083984375 |
| NODE2242X | NODE1946X | NODE1966X | 0.70050048828125 |
| NODE2243X | GENE1115X | GENE1114X | 0.7001953125     |
| NODE2244X | GENE1444X | GENE1443X | 0.7000732421875  |
| NODE2245X | NODE1938X | NODE1806X | 0.70001220703125 |
| NODE2246X | NODE2222X | NODE2126X | 0.699951171875   |
| NODE2247X | GENE1435X | GENE1434X | 0.699462890625   |
| NODE2248X | GENE1227X | GENE1226X | 0.69927978515625 |
| NODE2249X | NODE1928X | NODE1944X | 0.6988525390625  |
| NODE2250X | NODE1883X | GENE997X  | 0.6983642578125  |
| NODE2251X | NODE2179X | NODE2105X | 0.6982421875     |
| NODE2252X | NODE2187X | NODE2061X | 0.69720458984375 |
| NODE2253X | NODE2124X | NODE1925X | 0.6968994140625  |
| NODE2254X | GENE1774X | GENE1773X | 0.69677734375    |
| NODE2255X | NODE1920X | NODE1141X | 0.696533203125   |
| NODE2256X | NODE1995X | NODE2099X | 0.69635009765625 |
| NODE2257X | NODE1999X | NODE2082X | 0.69561767578125 |
| NODE2258X | NODE1949X | NODE2129X | 0.69512939453125 |
| NODE2259X | NODE1980X | GENE1005X | 0.695068359375   |
| NODE2260X | NODE1766X | NODE1698X | 0.69476318359375 |
| NODE2261X | NODE1661X | GENE1261X | 0.69378662109375 |
| NODE2262X | NODE1987X | GENE1875X | 0.693115234375   |
| NODE2263X | NODE1808X | NODE1972X | 0.6920166015625  |
| NODE2264X | NODE1992X | NODE2144X | 0.6920166015625  |
| NODE2265X | NODE1752X | NODE2140X | 0.6910400390625  |
| NODE2266X | NODE1873X | NODE2086X | 0.689208984375   |
| NODE2267X | NODE1549X | NODE1750X | 0.68914794921875 |
| NODE2268X | NODE2236X | GENE1436X | 0.68902587890625 |
| NODE2269X | NODE1975X | NODE2148X | 0.68896484375    |
| NODE2270X | NODE2065X | NODE1662X | 0.68890380859375 |
| NODE2271X | NODE2076X | NODE2050X | 0.6878662109375  |
| NODE2272X | NODE2260X | NODE1990X | 0.68707275390625 |
| NODE2273X | NODE2020X | NODE2038X | 0.68646240234375 |
| NODE2274X | NODE2083X | NODE1848X | 0.6861572265625  |
| NODE2275X | NODE1930X | NODE1744X | 0.68353271484375 |
| NODE2276X | NODE2174X | NODE2011X | 0.68304443359375 |
| NODE2277X | GENE1526X | NODE2097X | 0.681640625      |
| NODE2278X | NODE1776X | NODE2048X | 0.68121337890625 |
| NODE2279X | NODE2131X | NODE2054X | 0.6810302734375  |
| NODE2280X | NODE2161X | GENE1386X | 0.68048095703125 |



|           |           |           |                  |
|-----------|-----------|-----------|------------------|
| NODE2281X | NODE1902X | NODE2068X | 0.6802978515625  |
| NODE2282X | NODE2191X | NODE1905X | 0.679931640625   |
| NODE2283X | NODE1839X | NODE1087X | 0.67974853515625 |
| NODE2284X | GENE1256X | NODE1901X | 0.6793212890625  |
| NODE2285X | NODE1984X | NODE2003X | 0.6787109375     |
| NODE2286X | NODE1767X | NODE911X  | 0.67828369140625 |
| NODE2287X | NODE2069X | NODE1967X | 0.67828369140625 |
| NODE2288X | GENE1270X | NODE1544X | 0.67803955078125 |
| NODE2289X | NODE2072X | NODE2089X | 0.67767333984375 |
| NODE2290X | NODE1997X | GENE1859X | 0.677490234375   |
| NODE2291X | GENE1493X | GENE1492X | 0.67681884765625 |
| NODE2292X | GENE1396X | GENE1395X | 0.6759033203125  |
| NODE2293X | NODE2166X | NODE2171X | 0.675048828125   |
| NODE2294X | GENE1777X | GENE1464X | 0.6744384765625  |
| NODE2295X | NODE2062X | NODE2010X | 0.67364501953125 |
| NODE2296X | GENE1837X | GENE1836X | 0.67340087890625 |
| NODE2297X | NODE2231X | NODE2095X | 0.67230224609375 |
| NODE2298X | NODE2135X | GENE1557X | 0.67218017578125 |
| NODE2299X | NODE2073X | NODE2120X | 0.67138671875    |
| NODE2300X | NODE2273X | NODE2189X | 0.67138671875    |
| NODE2301X | NODE2088X | NODE2150X | 0.6712646484375  |
| NODE2302X | NODE2108X | NODE2160X | 0.67108154296875 |
| NODE2303X | GENE2082X | GENE1862X | 0.6702880859375  |
| NODE2304X | NODE324X  | NODE2193X | 0.66998291015625 |
| NODE2305X | GENE1495X | GENE1494X | 0.66973876953125 |
| NODE2306X | GENE1499X | GENE1498X | 0.66912841796875 |
| NODE2307X | NODE2034X | GENE1399X | 0.66705322265625 |
| NODE2308X | NODE2127X | NODE1674X | 0.66680908203125 |
| NODE2309X | NODE2146X | GENE951X  | 0.666748046875   |
| NODE2310X | GENE1868X | GENE1867X | 0.66558837890625 |
| NODE2311X | GENE1517X | NODE2152X | 0.6649169921875  |
| NODE2312X | NODE2155X | NODE1963X | 0.66485595703125 |
| NODE2313X | GENE1487X | GENE1486X | 0.664794921875   |
| NODE2314X | NODE1934X | NODE2123X | 0.66473388671875 |
| NODE2315X | GENE1771X | GENE1770X | 0.66412353515625 |
| NODE2316X | GENE994X  | NODE1932X | 0.66351318359375 |
| NODE2317X | NODE2213X | NODE1931X | 0.66241455078125 |
| NODE2318X | NODE2087X | NODE2192X | 0.66241455078125 |
| NODE2319X | GENE1402X | GENE1401X | 0.66204833984375 |
| NODE2320X | GENE942X  | GENE941X  | 0.66119384765625 |
| NODE2321X | NODE1962X | NODE2252X | 0.6561279296875  |
| NODE2322X | NODE2256X | NODE2022X | 0.6551513671875  |
| NODE2323X | NODE1994X | NODE2266X | 0.65399169921875 |
| NODE2324X | NODE2156X | NODE2206X | 0.6536865234375  |
| NODE2325X | GENE1370X | NODE1869X | 0.6531982421875  |
| NODE2326X | NODE2027X | NODE2301X | 0.6502685546875  |
| NODE2327X | NODE2016X | NODE1907X | 0.64990234375    |
| NODE2328X | NODE2267X | NODE2044X | 0.64984130859375 |
| NODE2329X | NODE2130X | NODE2018X | 0.649169921875   |
| NODE2330X | NODE2220X | NODE1895X | 0.64874267578125 |
| NODE2331X | GENE1260X | NODE1800X | 0.64862060546875 |
| NODE2332X | GENE1825X | GENE1824X | 0.64837646484375 |
| NODE2333X | NODE1809X | NODE2041X | 0.64825439453125 |
| NODE2334X | NODE1761X | NODE2265X | 0.64813232421875 |
| NODE2335X | NODE1615X | NODE2085X | 0.6478271484375  |
| NODE2336X | GENE1325X | GENE1324X | 0.64776611328125 |
| NODE2337X | NODE2005X | NODE2134X | 0.6468505859375  |

|           |           |           |                  |
|-----------|-----------|-----------|------------------|
| NODE2338X | NODE2133X | NODE2205X | 0.64605712890625 |
| NODE2339X | NODE2246X | NODE2028X | 0.64593505859375 |
| NODE2340X | GENE1108X | NODE1681X | 0.64508056640625 |
| NODE2341X | NODE2165X | NODE2047X | 0.64288330078125 |
| NODE2342X | NODE1780X | NODE1872X | 0.64263916015625 |
| NODE2343X | NODE2149X | GENE1556X | 0.641845703125   |
| NODE2344X | NODE2019X | NODE2198X | 0.640625         |
| NODE2345X | NODE2007X | GENE1423X | 0.63897705078125 |
| NODE2346X | NODE1996X | NODE2224X | 0.63812255859375 |
| NODE2347X | GENE1293X | NODE2098X | 0.63800048828125 |
| NODE2348X | NODE2035X | NODE2102X | 0.63726806640625 |
| NODE2349X | GENE1425X | GENE1424X | 0.636962890625   |
| NODE2350X | NODE2111X | NODE1988X | 0.63690185546875 |
| NODE2351X | GENE1446X | GENE1445X | 0.63677978515625 |
| NODE2352X | NODE2143X | NODE2271X | 0.63665771484375 |
| NODE2353X | GENE1154X | GENE1109X | 0.636474609375   |
| NODE2354X | GENE728X  | NODE2110X | 0.63525390625    |
| NODE2355X | NODE2137X | NODE1870X | 0.635009765625   |
| NODE2356X | NODE2136X | NODE2323X | 0.63433837890625 |
| NODE2357X | NODE2245X | NODE1864X | 0.6336669921875  |
| NODE2358X | GENE2171X | NODE2181X | 0.63360595703125 |
| NODE2359X | GENE1483X | NODE2248X | 0.63250732421875 |
| NODE2360X | NODE2114X | NODE2263X | 0.6324462890625  |
| NODE2361X | NODE2064X | NODE1892X | 0.632080078125   |
| NODE2362X | GENE1834X | GENE1833X | 0.6318359375     |
| NODE2363X | NODE1818X | GENE1520X | 0.63116455078125 |
| NODE2364X | NODE2046X | NODE2251X | 0.6304931640625  |
| NODE2365X | NODE2017X | NODE2106X | 0.63031005859375 |
| NODE2366X | NODE1801X | NODE2278X | 0.63031005859375 |
| NODE2367X | NODE2194X | NODE1964X | 0.6300048828125  |
| NODE2368X | NODE1303X | GENE1465X | 0.62969970703125 |
| NODE2369X | NODE2195X | NODE2159X | 0.62945556640625 |
| NODE2370X | NODE2145X | NODE2104X | 0.6273193359375  |
| NODE2371X | NODE2081X | GENE1450X | 0.62603759765625 |
| NODE2372X | GENE1313X | NODE2096X | 0.6258544921875  |
| NODE2373X | NODE2207X | GENE1079X | 0.624755859375   |
| NODE2374X | NODE2175X | NODE1885X | 0.62274169921875 |
| NODE2375X | NODE2295X | NODE2226X | 0.6226806640625  |
| NODE2376X | NODE2258X | NODE2118X | 0.6199951171875  |
| NODE2377X | NODE2091X | GENE1561X | 0.619873046875   |
| NODE2378X | GENE2167X | GENE2166X | 0.61883544921875 |
| NODE2379X | GENE1769X | NODE2109X | 0.6168212890625  |
| NODE2380X | NODE2284X | NODE2077X | 0.61541748046875 |
| NODE2381X | NODE2287X | GENE1938X | 0.6148681640625  |
| NODE2382X | NODE1867X | NODE2223X | 0.61383056640625 |
| NODE2383X | NODE2186X | NODE2169X | 0.6136474609375  |
| NODE2384X | NODE2119X | NODE2225X | 0.61285400390625 |
| NODE2385X | GENE1311X | NODE2210X | 0.611083984375   |
| NODE2386X | NODE2322X | NODE1706X | 0.60809326171875 |
| NODE2387X | GENE2077X | NODE1935X | 0.60577392578125 |
| NODE2388X | GENE1224X | GENE1223X | 0.60552978515625 |
| NODE2389X | NODE2164X | NODE2202X | 0.60540771484375 |
| NODE2390X | NODE2327X | NODE2162X | 0.6043701171875  |
| NODE2391X | NODE1893X | NODE2157X | 0.60302734375    |
| NODE2392X | NODE1737X | NODE2090X | 0.60198974609375 |
| NODE2393X | NODE2037X | NODE2233X | 0.60186767578125 |
| NODE2394X | NODE2279X | NODE2282X | 0.601318359375   |

|           |           |           |                  |
|-----------|-----------|-----------|------------------|
| NODE2395X | GENE1106X | NODE2067X | 0.60089111328125 |
| NODE2396X | NODE2153X | NODE1568X | 0.60089111328125 |
| NODE2397X | NODE2288X | NODE2180X | 0.5997314453125  |
| NODE2398X | GENE1546X | GENE1112X | 0.59930419921875 |
| NODE2399X | NODE2168X | NODE2100X | 0.597900390625   |
| NODE2400X | GENE1279X | NODE2204X | 0.59771728515625 |
| NODE2401X | NODE2250X | NODE2139X | 0.59716796875    |
| NODE2402X | NODE2341X | NODE2303X | 0.59661865234375 |
| NODE2403X | NODE2316X | NODE2182X | 0.59625244140625 |
| NODE2404X | NODE2177X | NODE1528X | 0.59619140625    |
| NODE2405X | GENE1497X | GENE1331X | 0.59417724609375 |
| NODE2406X | GENE1433X | NODE2318X | 0.59222412109375 |
| NODE2407X | NODE2208X | NODE2183X | 0.59130859375    |
| NODE2408X | NODE2261X | NODE2331X | 0.5909423828125  |
| NODE2409X | NODE2078X | GENE1467X | 0.58935546875    |
| NODE2410X | NODE2281X | NODE2070X | 0.588134765625   |
| NODE2411X | NODE1923X | NODE2349X | 0.58721923828125 |
| NODE2412X | NODE1913X | NODE2399X | 0.5865478515625  |
| NODE2413X | NODE2052X | NODE2272X | 0.58587646484375 |
| NODE2414X | NODE2293X | NODE2240X | 0.5853271484375  |
| NODE2415X | NODE2389X | NODE2239X | 0.5841064453125  |
| NODE2416X | GENE1111X | GENE1110X | 0.58160400390625 |
| NODE2417X | GENE1791X | NODE2121X | 0.5804443359375  |
| NODE2418X | NODE2290X | NODE2184X | 0.5802001953125  |
| NODE2419X | NODE2188X | NODE2321X | 0.5799560546875  |
| NODE2420X | NODE2376X | NODE2346X | 0.57867431640625 |
| NODE2421X | GENE1507X | GENE1230X | 0.5780029296875  |
| NODE2422X | NODE2128X | NODE2297X | 0.577880859375   |
| NODE2423X | NODE2309X | GENE952X  | 0.5770263671875  |
| NODE2424X | NODE2289X | NODE2269X | 0.576416015625   |
| NODE2425X | NODE81X   | GENE1328X | 0.5762939453125  |
| NODE2426X | NODE2243X | NODE2249X | 0.5751953125     |
| NODE2427X | NODE2214X | NODE2230X | 0.57366943359375 |
| NODE2428X | NODE2298X | NODE2173X | 0.573486328125   |
| NODE2429X | NODE2302X | NODE2365X | 0.573486328125   |
| NODE2430X | NODE1804X | NODE2036X | 0.57275390625    |
| NODE2431X | NODE2324X | NODE2227X | 0.5711669921875  |
| NODE2432X | GENE1506X | GENE1296X | 0.57073974609375 |
| NODE2433X | GENE1323X | NODE2276X | 0.56890869140625 |
| NODE2434X | NODE1927X | GENE1415X | 0.56787109375    |
| NODE2435X | GENE1456X | NODE2004X | 0.56634521484375 |
| NODE2436X | GENE1879X | GENE1878X | 0.56591796875    |
| NODE2437X | GENE1496X | NODE2305X | 0.5655517578125  |
| NODE2438X | GENE1213X | GENE1103X | 0.56494140625    |
| NODE2439X | NODE2030X | NODE2200X | 0.5625           |
| NODE2440X | NODE2012X | NODE2039X | 0.561767578125   |
| NODE2441X | NODE2286X | NODE2115X | 0.56036376953125 |
| NODE2442X | GENE1780X | GENE1562X | 0.55889892578125 |
| NODE2443X | NODE2221X | NODE1993X | 0.558837890625   |
| NODE2444X | NODE2158X | NODE2203X | 0.5584716796875  |
| NODE2445X | NODE2094X | NODE2350X | 0.5579833984375  |
| NODE2446X | NODE2379X | NODE1875X | 0.557373046875   |
| NODE2447X | GENE1553X | GENE1552X | 0.5565185546875  |
| NODE2448X | NODE2339X | NODE2393X | 0.55523681640625 |
| NODE2449X | NODE2033X | NODE2292X | 0.55413818359375 |
| NODE2450X | NODE2196X | NODE2325X | 0.5540771484375  |
| NODE2451X | NODE2244X | GENE1442X | 0.55401611328125 |

|           |           |           |                  |
|-----------|-----------|-----------|------------------|
| NODE2452X | NODE2257X | NODE2178X | 0.55322265625    |
| NODE2453X | NODE1950X | NODE2218X | 0.552734375      |
| NODE2454X | NODE2253X | NODE2264X | 0.55224609375    |
| NODE2455X | NODE2363X | NODE2015X | 0.5430908203125  |
| NODE2456X | NODE1898X | NODE1866X | 0.5386962890625  |
| NODE2457X | NODE2167X | NODE2397X | 0.5380859375     |
| NODE2458X | GENE1365X | NODE2450X | 0.53753662109375 |
| NODE2459X | NODE2217X | NODE2176X | 0.53662109375    |
| NODE2460X | NODE2300X | NODE2212X | 0.53619384765625 |
| NODE2461X | GENE2411X | NODE2332X | 0.5360107421875  |
| NODE2462X | NODE2254X | GENE1772X | 0.5340576171875  |
| NODE2463X | NODE2391X | NODE2228X | 0.5333251953125  |
| NODE2464X | GENE1410X | NODE1982X | 0.53289794921875 |
| NODE2465X | NODE1941X | GENE1502X | 0.53289794921875 |
| NODE2466X | NODE2402X | NODE2418X | 0.53167724609375 |
| NODE2467X | NODE2357X | NODE2219X | 0.5311279296875  |
| NODE2468X | NODE2275X | NODE2319X | 0.531005859375   |
| NODE2469X | NODE2403X | NODE2354X | 0.5291748046875  |
| NODE2470X | NODE2235X | NODE1952X | 0.526123046875   |
| NODE2471X | GENE1468X | GENE1455X | 0.5252685546875  |
| NODE2472X | NODE2412X | NODE2424X | 0.52520751953125 |
| NODE2473X | NODE2001X | NODE2387X | 0.5247802734375  |
| NODE2474X | NODE2141X | NODE2056X | 0.52471923828125 |
| NODE2475X | NODE2242X | NODE2190X | 0.523681640625   |
| NODE2476X | NODE2307X | NODE2008X | 0.521240234375   |
| NODE2477X | NODE2163X | NODE2132X | 0.51812744140625 |
| NODE2478X | NODE2361X | NODE2285X | 0.51727294921875 |
| NODE2479X | NODE2348X | NODE2259X | 0.51580810546875 |
| NODE2480X | NODE2314X | NODE2443X | 0.51153564453125 |
| NODE2481X | NODE2428X | NODE2343X | 0.51068115234375 |
| NODE2482X | GENE1480X | NODE2368X | 0.50897216796875 |
| NODE2483X | NODE2360X | NODE2383X | 0.506103515625   |
| NODE2484X | GENE1318X | GENE1314X | 0.50555419921875 |
| NODE2485X | NODE2234X | NODE1740X | 0.505126953125   |
| NODE2486X | GENE1107X | NODE2342X | 0.504150390625   |
| NODE2487X | NODE2237X | NODE2370X | 0.50390625       |
| NODE2488X | NODE2375X | NODE2390X | 0.50347900390625 |
| NODE2489X | NODE2262X | GENE1874X | 0.503173828125   |
| NODE2490X | NODE610X  | NODE2268X | 0.5029296875     |
| NODE2491X | NODE2312X | NODE2356X | 0.49957275390625 |
| NODE2492X | NODE2197X | GENE1441X | 0.49920654296875 |
| NODE2493X | NODE2084X | NODE2280X | 0.4986572265625  |
| NODE2494X | NODE2431X | NODE2308X | 0.4984130859375  |
| NODE2495X | NODE2419X | NODE2270X | 0.495849609375   |
| NODE2496X | NODE2311X | NODE2283X | 0.49560546875    |
| NODE2497X | NODE2299X | NODE2429X | 0.4945068359375  |
| NODE2498X | NODE2344X | NODE2442X | 0.4945068359375  |
| NODE2499X | NODE2364X | NODE2483X | 0.49017333984375 |
| NODE2500X | NODE2388X | NODE2438X | 0.48980712890625 |
| NODE2501X | NODE2435X | NODE2367X | 0.4852294921875  |
| NODE2502X | NODE2371X | GENE1449X | 0.48388671875    |
| NODE2503X | NODE2460X | NODE2414X | 0.4822998046875  |
| NODE2504X | NODE2384X | NODE2274X | 0.48175048828125 |
| NODE2505X | GENE1907X | NODE2296X | 0.4798583984375  |
| NODE2506X | NODE2310X | NODE2410X | 0.4793701171875  |
| NODE2507X | NODE2334X | NODE2328X | 0.47918701171875 |
| NODE2508X | GENE1220X | NODE2066X | 0.4779052734375  |

|           |           |           |                  |
|-----------|-----------|-----------|------------------|
| NODE2509X | NODE2317X | NODE2304X | 0.475341796875   |
| NODE2510X | NODE2392X | NODE2358X | 0.47412109375    |
| NODE2511X | NODE2382X | NODE2216X | 0.47247314453125 |
| NODE2512X | NODE2313X | GENE1454X | 0.4716796875     |
| NODE2513X | GENE1312X | NODE2385X | 0.46966552734375 |
| NODE2514X | NODE2472X | NODE2504X | 0.4677734375     |
| NODE2515X | NODE2446X | NODE2199X | 0.46636962890625 |
| NODE2516X | GENE2285X | NODE2338X | 0.4659423828125  |
| NODE2517X | NODE2241X | NODE2345X | 0.4649658203125  |
| NODE2518X | NODE2026X | NODE2351X | 0.46466064453125 |
| NODE2519X | NODE2430X | NODE2413X | 0.46441650390625 |
| NODE2520X | NODE2495X | NODE2330X | 0.4627685546875  |
| NODE2521X | NODE2449X | NODE1434X | 0.46240234375    |
| NODE2522X | NODE2247X | NODE2406X | 0.458984375      |
| NODE2523X | NODE2185X | GENE1374X | 0.4581298828125  |
| NODE2524X | NODE2386X | NODE2215X | 0.45733642578125 |
| NODE2525X | NODE2113X | GENE1508X | 0.45574951171875 |
| NODE2526X | NODE2117X | NODE2333X | 0.4542236328125  |
| NODE2527X | NODE2440X | GENE1505X | 0.452392578125   |
| NODE2528X | NODE1884X | NODE2404X | 0.4501953125     |
| NODE2529X | NODE2369X | NODE2352X | 0.4481201171875  |
| NODE2530X | NODE2154X | NODE2487X | 0.447509765625   |
| NODE2531X | NODE2433X | NODE2229X | 0.4473876953125  |
| NODE2532X | NODE1861X | NODE2122X | 0.4373779296875  |
| NODE2533X | NODE2394X | NODE2467X | 0.436279296875   |
| NODE2534X | NODE2232X | NODE2306X | 0.4327392578125  |
| NODE2535X | NODE2497X | NODE2491X | 0.43145751953125 |
| NODE2536X | NODE2415X | NODE2480X | 0.430908203125   |
| NODE2537X | NODE2423X | NODE2320X | 0.4305419921875  |
| NODE2538X | NODE2396X | NODE2422X | 0.423095703125   |
| NODE2539X | NODE2434X | NODE2209X | 0.42022705078125 |
| NODE2540X | NODE2420X | NODE2473X | 0.418212890625   |
| NODE2541X | NODE2444X | NODE2355X | 0.4132080078125  |
| NODE2542X | NODE2452X | NODE2466X | 0.41278076171875 |
| NODE2543X | NODE2294X | NODE2238X | 0.4119873046875  |
| NODE2544X | NODE2381X | NODE2451X | 0.40838623046875 |
| NODE2545X | NODE2448X | NODE2503X | 0.4024658203125  |
| NODE2546X | NODE2377X | NODE2335X | 0.40130615234375 |
| NODE2547X | NODE2277X | NODE2336X | 0.401123046875   |
| NODE2548X | NODE2353X | GENE1113X | 0.40069580078125 |
| NODE2549X | NODE2329X | NODE2522X | 0.39910888671875 |
| NODE2550X | NODE2468X | GENE1400X | 0.39471435546875 |
| NODE2551X | NODE2436X | GENE1453X | 0.39324951171875 |
| NODE2552X | NODE2514X | NODE2516X | 0.39208984375    |
| NODE2553X | NODE2459X | NODE2470X | 0.3907470703125  |
| NODE2554X | NODE2366X | NODE2441X | 0.385009765625   |
| NODE2555X | NODE2395X | NODE2457X | 0.38409423828125 |
| NODE2556X | NODE2437X | NODE2291X | 0.38397216796875 |
| NODE2557X | NODE2511X | GENE1422X | 0.38372802734375 |
| NODE2558X | NODE2439X | NODE2400X | 0.38165283203125 |
| NODE2559X | NODE2513X | NODE2372X | 0.38153076171875 |
| NODE2560X | NODE2477X | NODE2421X | 0.37518310546875 |
| NODE2561X | NODE2340X | NODE2537X | 0.368896484375   |
| NODE2562X | NODE2489X | NODE2506X | 0.3680419921875  |
| NODE2563X | NODE2532X | NODE2458X | 0.363525390625   |
| NODE2564X | NODE2538X | NODE2499X | 0.36224365234375 |
| NODE2565X | NODE2315X | NODE2326X | 0.3582763671875  |

|           |           |           |                  |
|-----------|-----------|-----------|------------------|
| NODE2566X | NODE2337X | NODE2526X | 0.35760498046875 |
| NODE2567X | NODE2211X | NODE2463X | 0.3575439453125  |
| NODE2568X | NODE2505X | NODE2409X | 0.35321044921875 |
| NODE2569X | NODE2535X | NODE2469X | 0.35150146484375 |
| NODE2570X | NODE2465X | NODE2492X | 0.348876953125   |
| NODE2571X | NODE2432X | NODE2201X | 0.3486328125     |
| NODE2572X | NODE2359X | NODE2373X | 0.34381103515625 |
| NODE2573X | NODE2571X | NODE2380X | 0.3343505859375  |
| NODE2574X | NODE2524X | NODE2510X | 0.32464599609375 |
| NODE2575X | NODE2447X | NODE2474X | 0.323974609375   |
| NODE2576X | NODE2570X | NODE2549X | 0.32305908203125 |
| NODE2577X | NODE2461X | NODE2362X | 0.32159423828125 |
| NODE2578X | NODE2494X | NODE2427X | 0.320556640625   |
| NODE2579X | NODE2488X | NODE2475X | 0.318115234375   |
| NODE2580X | NODE2520X | NODE2407X | 0.3072509765625  |
| NODE2581X | NODE2476X | NODE2471X | 0.3013916015625  |
| NODE2582X | NODE2478X | NODE2411X | 0.2967529296875  |
| NODE2583X | NODE2501X | NODE2567X | 0.2965087890625  |
| NODE2584X | NODE2531X | NODE2374X | 0.29339599609375 |
| NODE2585X | NODE2485X | NODE2517X | 0.291259765625   |
| NODE2586X | GENE1759X | NODE2493X | 0.28924560546875 |
| NODE2587X | NODE2455X | NODE2481X | 0.28790283203125 |
| NODE2588X | NODE2574X | NODE2378X | 0.2822265625     |
| NODE2589X | GENE1466X | NODE1794X | 0.27996826171875 |
| NODE2590X | NODE2539X | NODE2508X | 0.278076171875   |
| NODE2591X | NODE2545X | NODE2529X | 0.27325439453125 |
| NODE2592X | NODE2575X | NODE2445X | 0.2718505859375  |
| NODE2593X | NODE2496X | NODE2547X | 0.2640380859375  |
| NODE2594X | NODE2255X | NODE2426X | 0.26171875       |
| NODE2595X | NODE2462X | NODE2515X | 0.25634765625    |
| NODE2596X | NODE2500X | NODE2509X | 0.25250244140625 |
| NODE2597X | NODE2454X | NODE2552X | 0.25213623046875 |
| NODE2598X | NODE2347X | NODE2554X | 0.24908447265625 |
| NODE2599X | NODE2581X | NODE2490X | 0.23687744140625 |
| NODE2600X | NODE2425X | NODE1853X | 0.23272705078125 |
| NODE2601X | NODE2555X | NODE2564X | 0.232421875      |
| NODE2602X | NODE2548X | NODE2486X | 0.23046875       |
| NODE2603X | NODE2479X | NODE2569X | 0.2266845703125  |
| NODE2604X | NODE2582X | NODE2453X | 0.216064453125   |
| NODE2605X | NODE2541X | NODE2519X | 0.2158203125     |
| NODE2606X | NODE2592X | NODE2398X | 0.20672607421875 |
| NODE2607X | NODE2534X | NODE2417X | 0.2056884765625  |
| NODE2608X | NODE2527X | NODE2587X | 0.204345703125   |
| NODE2609X | NODE2559X | NODE2401X | 0.20245361328125 |
| NODE2610X | NODE2599X | NODE2482X | 0.19952392578125 |
| NODE2611X | NODE2502X | NODE2518X | 0.19879150390625 |
| NODE2612X | NODE2533X | NODE2579X | 0.19879150390625 |
| NODE2613X | NODE2543X | NODE2573X | 0.1708984375     |
| NODE2614X | NODE2540X | NODE2542X | 0.16845703125    |
| NODE2615X | NODE2498X | NODE2565X | 0.15972900390625 |
| NODE2616X | NODE2557X | GENE1409X | 0.156982421875   |
| NODE2617X | NODE2580X | NODE2536X | 0.14898681640625 |
| NODE2618X | NODE2589X | NODE2484X | 0.14434814453125 |
| NODE2619X | NODE2544X | NODE2585X | 0.142578125      |
| NODE2620X | NODE2562X | NODE2507X | 0.1297607421875  |
| NODE2621X | NODE2594X | NODE2561X | 0.125732421875   |
| NODE2622X | NODE2405X | NODE2600X | 0.1162109375     |

|           |           |           |                   |
|-----------|-----------|-----------|-------------------|
| NODE2623X | NODE2578X | NODE2553X | 0.10870361328125  |
| NODE2624X | NODE2528X | NODE2523X | 0.10516357421875  |
| NODE2625X | NODE2586X | NODE2464X | 0.0953369140625   |
| NODE2626X | NODE2603X | NODE2591X | 0.09478759765625  |
| NODE2627X | NODE2512X | NODE2416X | 0.08892822265625  |
| NODE2628X | NODE2525X | NODE2456X | 0.08355712890625  |
| NODE2629X | NODE2595X | NODE2615X | 0.0731201171875   |
| NODE2630X | NODE2566X | NODE2530X | 0.0633544921875   |
| NODE2631X | NODE2550X | NODE2521X | 0.0631103515625   |
| NODE2632X | NODE2614X | NODE2551X | 0.058349609375    |
| NODE2633X | NODE2583X | NODE2601X | 0.0513916015625   |
| NODE2634X | NODE2588X | NODE2597X | 0.04534912109375  |
| NODE2635X | NODE2546X | NODE2606X | 0.02777099609375  |
| NODE2636X | NODE2617X | NODE2568X | 0.01959228515625  |
| NODE2637X | NODE2560X | NODE2590X | 0.0035400390625   |
| NODE2638X | NODE2558X | NODE2598X | -0.0023193359375  |
| NODE2639X | NODE2572X | NODE2630X | -0.00567626953125 |
| NODE2640X | NODE2634X | NODE2604X | -0.019287109375   |
| NODE2641X | NODE2616X | NODE2408X | -0.0308837890625  |
| NODE2642X | NODE2556X | NODE2611X | -0.05401611328125 |
| NODE2643X | NODE2612X | NODE2619X | -0.0570068359375  |
| NODE2644X | NODE2624X | NODE2563X | -0.06036376953125 |
| NODE2645X | NODE2621X | NODE2602X | -0.0782470703125  |
| NODE2646X | NODE2639X | NODE2596X | -0.0806884765625  |
| NODE2647X | NODE2628X | NODE2607X | -0.082275390625   |
| NODE2648X | NODE2635X | NODE2593X | -0.09173583984375 |
| NODE2649X | NODE2632X | NODE2577X | -0.120361328125   |
| NODE2650X | NODE2584X | NODE2609X | -0.13482666015625 |
| NODE2651X | NODE2623X | NODE2576X | -0.1534423828125  |
| NODE2652X | NODE2648X | NODE2641X | -0.16180419921875 |
| NODE2653X | NODE2629X | NODE2608X | -0.17266845703125 |
| NODE2654X | NODE2649X | NODE2620X | -0.1864013671875  |
| NODE2655X | NODE2610X | NODE2631X | -0.197509765625   |
| NODE2656X | NODE2650X | NODE2626X | -0.208984375      |
| NODE2657X | NODE2636X | NODE2643X | -0.221435546875   |
| NODE2658X | NODE2656X | NODE2633X | -0.2232666015625  |
| NODE2659X | NODE2627X | NODE2625X | -0.25689697265625 |
| NODE2660X | NODE2637X | NODE2638X | -0.26312255859375 |
| NODE2661X | NODE2640X | NODE2647X | -0.26763916015625 |
| NODE2662X | NODE2644X | NODE2605X | -0.27288818359375 |
| NODE2663X | NODE2651X | NODE2642X | -0.2933349609375  |
| NODE2664X | NODE2622X | NODE2618X | -0.311767578125   |
| NODE2665X | NODE2652X | NODE2613X | -0.3934326171875  |
| NODE2666X | NODE2659X | NODE2646X | -0.44537353515625 |
| NODE2667X | NODE2653X | NODE2665X | -0.4530029296875  |
| NODE2668X | NODE2645X | NODE2658X | -0.46063232421875 |
| NODE2669X | NODE2664X | NODE2662X | -0.48321533203125 |
| NODE2670X | NODE2657X | NODE2654X | -0.4915771484375  |
| NODE2671X | NODE2661X | NODE2663X | -0.516845703125   |
| NODE2672X | NODE2670X | NODE2655X | -0.577392578125   |
| NODE2673X | NODE2669X | NODE2666X | -0.65106201171875 |
| NODE2674X | NODE2660X | NODE2668X | -0.676025390625   |
| NODE2675X | NODE2671X | NODE2667X | -0.71856689453125 |
| NODE2676X | NODE2673X | NODE2674X | -0.83319091796875 |
| NODE2677X | NODE2672X | NODE2675X | -0.92205810546875 |
| NODE2678X | NODE2677X | NODE2676X | -0.98870849609375 |
