# Supplementary material
Source: PubMed Central journal article supplement (PMC141204)

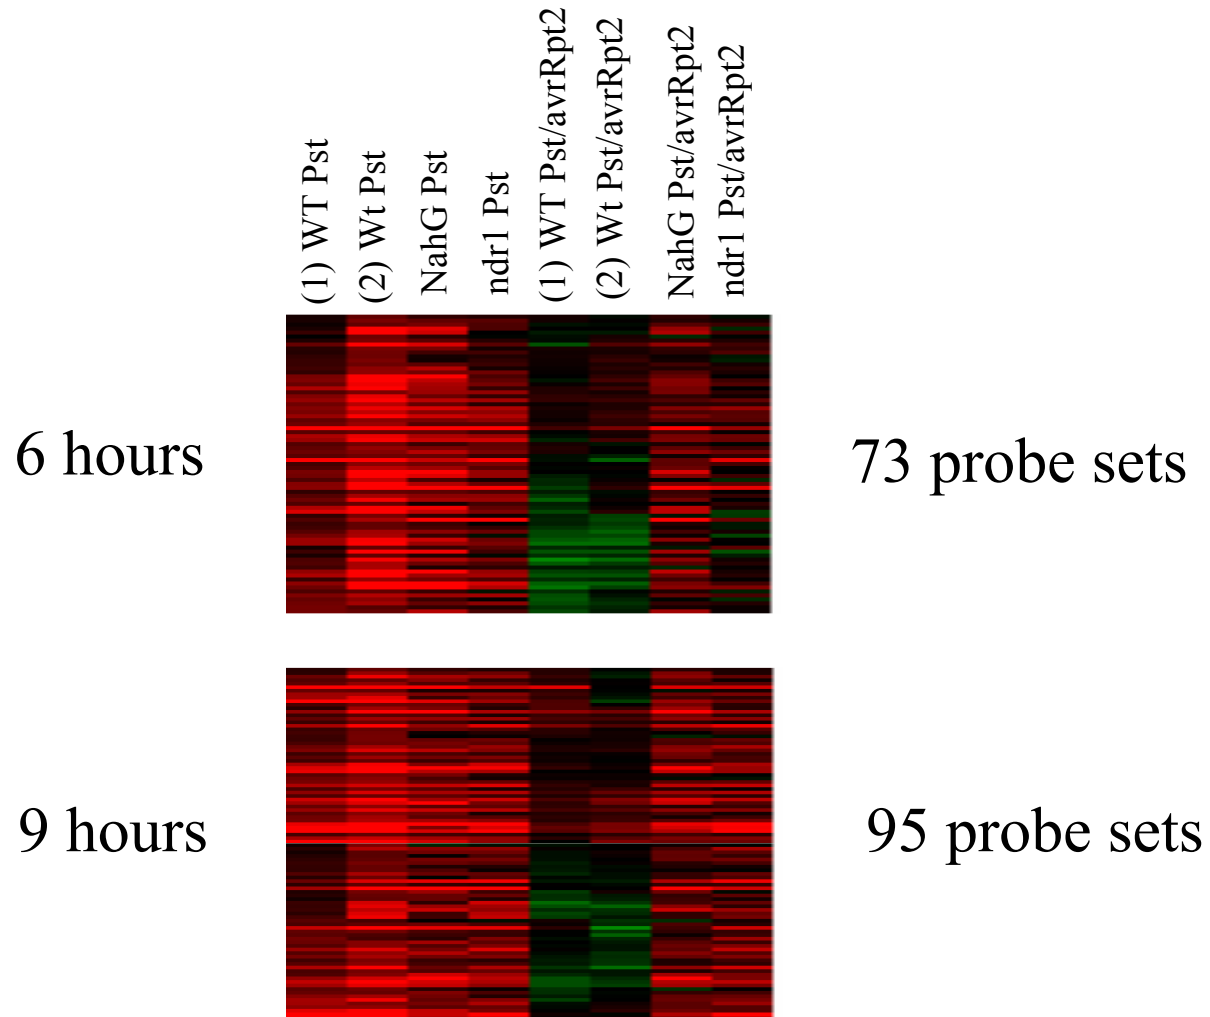

Examples for Genes A and B

Supplement: plntcell_15_2_317__11.pdf [file plntcell_15_2_317__11.pdf]
